# Supplementary material for: Profiling stress-triggered RNA condensation with photocatalytic proximity labeling
Source: Research Square preprint supplement (doi:10.21203/rs.3.rs-2513504/v1), 2023-02-14
Supplement: Supplementary file 1 [file 427332c37e0eb6cca4d033ac.xlsx]

## Sheet: primer and sequence
Primer	Sequence (5' to 3')
APLP2_1	CTAAATCTGCATCTGCTCCAGGTATTTGTAGCCTCCTAAGTTTCGAGCTGGACTCAGTG
APLP2_2	TCTTGGGCTACATAAGGTACTTTGTAGAGCACCTCCTAAGTTTCGAGCTGGACTCAGTG
APLP2_3	CAACATCATTGGTTGGCAGAGGAGTTGGAGGCCTCCTAAGTTTCGAGCTGGACTCAGTG
APLP2_4	ACACATATTCAGTGCCATGGAACTGGTCTCCTCCTAAGTTTCGAGCTGGACTCAGTG
APLP2_5	TGGCACTTTTCTGGAACTAGCAGGACATCCCTCCTAAGTTTCGAGCTGGACTCAGTG
APLP2_6	CAACAGCAAATCCTGTTCCGGCATTGGCCCTCCTAAGTTTCGAGCTGGACTCAGTG
APLP2_7	TCCTGAAGGAGCTCATCAATTTCCTCTTGCCTCCTAAGTTTCGAGCTGGACTCAGTG
APLP2_8	GAGGCTTTGGTTCCTCCTTTCTTCAATCACCTCCTAAGTTTCGAGCTGGACTCAGTG
APLP2_9	GAGATGTGTCATCACCTGGGATTTCATCTGCCTCCTAAGTTTCGAGCTGGACTCAGTG
APLP2_10	GGATGGTATGTAAGCGATCTTTGTTCTCAGCCCTCCTAAGTTTCGAGCTGGACTCAGTG
APLP2_11	ATGAGTAATTTCCTTGTCTGACATGGTGCCCCTCCTAAGTTTCGAGCTGGACTCAGTG
APLP2_12	AAAGCGACTCTTGCATTGCTTTTTGTCCCCCTCCTAAGTTTCGAGCTGGACTCAGTG
APLP2_13	TTTGTTTCAAAGCAGCTCTTGGTGCCTGTTCCTCCTAAGTTTCGAGCTGGACTCAGTG
APLP2_14	CAGGTTCCCATTTCCCAGTCTGAATGTTCCCTCCTAAGTTTCGAGCTGGACTCAGTG
APLP2_15	TGAGAGCACTGCTACTCAGACTGAAGTCCCTCCTAAGTTTCGAGCTGGACTCAGTG
APLP2_16	ACATAACGCCGTAAGGCCTGGAGAATGCCCTCCTAAGTTTCGAGCTGGACTCAGTG
APLP2_17	TTTAACCATGGCTTGGAAGTGCTGAATCAGACCTCCTAAGTTTCGAGCTGGACTCAGTG
APLP2_18	CTCATTATCATCTGCAGAGGTCTCGAAATACCCTCCTAAGTTTCGAGCTGGACTCAGTG
APLP2_19	ATCGCTTTACACACAGCCATACAATAATCCCCTCCTAAGTTTCGAGCTGGACTCAGTG
APLP2_20	ACCATATATAAAGCGCACGCACTTTCCCCCTCCTAAGTTTCGAGCTGGACTCAGTG
APLP2_21	AGAGGTCGAAGTACCAACGAGGCATCACGCCTCCTAAGTTTCGAGCTGGACTCAGTG
APLP2_22	TGACACAGATCCAATAATCTTTGTCTGAGGGCCTCCTAAGTTTCGAGCTGGACTCAGTG
APLP2_23	ACAAATTCACCCACGAGACACTTGAAAGGTGCCTCCTAAGTTTCGAGCTGGACTCAGTG
APLP2_24	GATACATCTCCTGACAGTACTGAAGAACTTCCCTCCTAAGTTTCGAGCTGGACTCAGTG
BMS1_1	GATGTTACTGGGTTATAGAACGCTGGGATGGCCTCCTAAGTTTCGAGCTGGACTCAGTG
BMS1_2	CTTCAAAGTCACCGTAGAGCTCCTCATCCCTCCTAAGTTTCGAGCTGGACTCAGTG
BMS1_3	CTTTCCAGTCACGAAGCAATCTCTGATACTCCTCCTAAGTTTCGAGCTGGACTCAGTG
BMS1_4	CCAGAATCGAAAGTGGGGAGAGCTGCTTTCCCTCCTAAGTTTCGAGCTGGACTCAGTG
BMS1_5	GCCGGGTAAAGTTCCGAATGAGGCATTGTATCCTCCTAAGTTTCGAGCTGGACTCAGTG
BMS1_6	TTCTGAAGAGCTTCTTCCTGAGGTCCTTCCCTCCTAAGTTTCGAGCTGGACTCAGTG
BMS1_7	CTTCTTCATCTTCTGACTATGCACCGTACCCTCCTAAGTTTCGAGCTGGACTCAGTG
BMS1_8	GCATCCAGCAGTGCAAGGATCTTTCTTTCCTCCTAAGTTTCGAGCTGGACTCAGTG
BMS1_9	TTGGGCTTGTTCTTAAATGGCAGGGCCTCCTCCTAAGTTTCGAGCTGGACTCAGTG
BMS1_10	ATGTTTCTTTTGCCTCAGGATTGGCTTATACCCTCCTAAGTTTCGAGCTGGACTCAGTG
BMS1_11	ATGATTGGATCTCGGGACTTGAGGATTTTCTCCTCCTAAGTTTCGAGCTGGACTCAGTG
BMS1_12	CTTCATCATCTTGATCTTCAAATTCTGCGCCCTCCTAAGTTTCGAGCTGGACTCAGTG
BMS1_13	AGCTGTGCTTGTTTCTGCATTTCTCCTTCCTCCTAAGTTTCGAGCTGGACTCAGTG
BMS1_14	TTCTCTATATCTTCATTCTGAGTATTGGGGCCCTCCTAAGTTTCGAGCTGGACTCAGTG
BMS1_15	CTAAGACCTTGGCTGCATCTTTATCATCTCCTCCTAAGTTTCGAGCTGGACTCAGTG
BMS1_16	ATAAGCTTTCGGAGGTTTGGAGCTGCTTGCCCTCCTAAGTTTCGAGCTGGACTCAGTG
BMS1_17	TGCACTGAGTGAGGAGCTTTCTTCAGATTCCCTCCTAAGTTTCGAGCTGGACTCAGTG
BMS1_18	CTGTCTTCTTCCAACTCAAGTTTCCGTCGTCCTCCTAAGTTTCGAGCTGGACTCAGTG
BMS1_19	ACCAGTGTTCAAGTCCATTTGTTTTTCCTCCCCTCCTAAGTTTCGAGCTGGACTCAGTG
BMS1_20	AGCTTCTCCTTCTCATTTAAACAGCGCTCCTCCTAAGTTTCGAGCTGGACTCAGTG
BMS1_21	TGTTGTTCAGGAAGAGCGCAAGGGTCTGGGCCTCCTAAGTTTCGAGCTGGACTCAGTG
BMS1_22	ACATTTGATGTTTGTTCGGATATCCTCTGGGCCTCCTAAGTTTCGAGCTGGACTCAGTG
BMS1_23	TGCTCTTTCCAACTTTTGGAGGTCCCATCCTCCTAAGTTTCGAGCTGGACTCAGTG
GAS1_1	CCTGAACACTGCAGCTAGCTTTCTGGACCTCCTAAGTTTCGAGCTGGACTCAGTG
GAS1_2	AGCTCCGGAGAGGAGCTTCAGGGGAAGCCTCCTAAGTTTCGAGCTGGACTCAGTG
GAS1_3	GAATGAGGGCCGAGATGCAGTGACTCGGCCTCCTAAGTTTCGAGCTGGACTCAGTG
GAS1_4	TGGAAATGAACAGCTGTCGAGATCTGGTCCCCTCCTAAGTTTCGAGCTGGACTCAGTG
GAS1_5	TTAGGGGTTCCCTCTAAGGCAATCGCCCCTCCTAAGTTTCGAGCTGGACTCAGTG
GAS1_6	TCCCTTTCGAGTCCAGGACTACTGTTCTCCTCCTAAGTTTCGAGCTGGACTCAGTG
GAS1_7	CCACATGCTTGCTTCCTCCCGGACCCTCCTAAGTTTCGAGCTGGACTCAGTG
GAS1_8	GCAGACGAGTTGGGAGTTTCTGGAGCTTGGCCTCCTAAGTTTCGAGCTGGACTCAGTG
GAS1_9	TTGGGGCGGGGGAGGAGGTCCAAGAAGTCCTCCTAAGTTTCGAGCTGGACTCAGTG
GAS1_10	CTATCTGTCCCAAGCCACAGGTGCCCCTCCTAAGTTTCGAGCTGGACTCAGTG
GAS1_11	CCTCATCGTAGTAGTCGTCCAGGCCCCCTCCTAAGTTTCGAGCTGGACTCAGTG
GAS1_12	CCATGTTCTCCTTGACCGACTCGCAGCCTCCTAAGTTTCGAGCTGGACTCAGTG
GAS1_13	TTGAGCAGCGCCGCCTTGGGCATACCTCCTAAGTTTCGAGCTGGACTCAGTG
GAS1_14	CAGCATGTCCTCAATGACGGTGCGGCCCTCCTAAGTTTCGAGCTGGACTCAGTG
GAS1_15	GACTTTGCCGCAGTAGGTCAGGTAGCGGCCTCCTAAGTTTCGAGCTGGACTCAGTG
GAS1_16	GCGCGCTTGGTGGACTTGCAGTTCTCCCTCCTAAGTTTCGAGCTGGACTCAGTG
GAS1_17	TTCATAAATCCATGCGCGCCGCTGGCCTCCTAAGTTTCGAGCTGGACTCAGTG
GAS1_18	CTTTCGCTCTGGCTGCGGTGGCTTCCTCCTAAGTTTCGAGCTGGACTCAGTG
GAS1_19	NNNNNNNNCGGGTGCATTTTGCTCCGCGCCTCCTCCTAAGTTTCGAGCTGGACTCAGTG
GAS1_20	AAATATAGCACACTTCACAATGGACTGTGGGCCTCCTAAGTTTCGAGCTGGACTCAGTG
GAS1_21	TTATATACGATGTACCAGGGTTTAGCAACCCCCTCCTAAGTTTCGAGCTGGACTCAGTG
GAS1_22	ATAGGAGCAGAGGCAATATACATTCTCCGCCCTCCTAAGTTTCGAGCTGGACTCAGTG
GAS1_23	AAAGAGACTTTCATACATGGCAGTGCAGAGCCCTCCTAAGTTTCGAGCTGGACTCAGTG
GAS1_24	AGATCAGCATTTTTGGACCCTTAATCCTAAGCCTCCTAAGTTTCGAGCTGGACTCAGTG
GAS1_25	TTTACATAGGATTATAATATCCTCACTGGCCCCTCCTAAGTTTCGAGCTGGACTCAGTG
GAS1_26	ATATAATTCCTCCTTCCCAACCCTTCAACCTCCTAAGTTTCGAGCTGGACTCAGTG
GAS1_27	NNCGGACGCGGAGCCGGTGGAAAAGTTTGTCCCTCCTAAGTTTCGAGCTGGACTCAGTG
GAS1_28	AGTCCTGCCCACTTCTTGCATGAGTGCCTCCTAAGTTTCGAGCTGGACTCAGTG
GAS1_29	CGGGAAGCGCGGGGAGAACAAGAAAGTCGGCCTCCTAAGTTTCGAGCTGGACTCAGTG
GAS1_30	AAAAGTTGCATTGTTCAACACCATGGCAACCCCTCCTAAGTTTCGAGCTGGACTCAGTG
GAS1_31	AAGGTCAAGGGCTCAAACTTATCCAAAACCACCTCCTAAGTTTCGAGCTGGACTCAGTG
USP7_1	AATGGCCTTTTCAAGGTAAGTGTAGCGACTCCCTCCTAAGTTTCGAGCTGGACTCAGTG
USP7_2	TCGGTTTAACTTCCTCATAGAGGATAAGGCTCCTCCTAAGTTTCGAGCTGGACTCAGTG
USP7_3	TTACAGGATATTGGTGTGTAGATATGCCCACCCTCCTAAGTTTCGAGCTGGACTCAGTG
USP7_4	GATCTTTATCAAACTTGGGTAAGGTCGCTCCCCTCCTAAGTTTCGAGCTGGACTCAGTG
USP7_5	GCAGTGTCGAACAGACAGGTCGTCATCGTCCTCCTAAGTTTCGAGCTGGACTCAGTG
USP7_6	TTCATCAAGTGGTAACTGCTCTGGGAATTCACCTCCTAAGTTTCGAGCTGGACTCAGTG
USP7_7	TCTCATCAGTTGTAGATGTAACACTGGTGGCCCTCCTAAGTTTCGAGCTGGACTCAGTG
USP7_8	TTTACACTGGATATAGGACACCATTTTGCCGCCTCCTAAGTTTCGAGCTGGACTCAGTG
USP7_9	TGGGGCTTTGTTGAAGTGGTCGAGCCCTCCTCCTAAGTTTCGAGCTGGACTCAGTG
USP7_10	TCTTTGTCTATGTCCACCTGGTCCAAAGGCCTCCTAAGTTTCGAGCTGGACTCAGTG
USP7_11	CTCTATTCGAAACGTCCGGCTCGTTGCACCTCCTAAGTTTCGAGCTGGACTCAGTG
USP7_12	ACTTCGCCTGTTCTCAAAGTCTGTGATTTTCCCTCCTAAGTTTCGAGCTGGACTCAGTG
USP7_13	ACTCCTTTGCGGTGGGTAATTCACTGTTATCCTCCTAAGTTTCGAGCTGGACTCAGTG
USP7_14	TTCAAGCTCCGCGTTTTGGGATCATACATCCTCCTAAGTTTCGAGCTGGACTCAGTG
USP7_15	TGGTCGTTTTGTTCCATTACTCCTTGCTTGCCTCCTAAGTTTCGAGCTGGACTCAGTG
USP7_16	CACTTGCATATAGAGATGGGCTTCCTGCCCTCCTAAGTTTCGAGCTGGACTCAGTG
USP7_17	ATTTGCAGGGTCCTTAGGATCTGTTTTTTGCCCTCCTAAGTTTCGAGCTGGACTCAGTG
USP7_18	TGATCTTGATATTTTGGTCCGTCTGAGGGTCCCTCCTAAGTTTCGAGCTGGACTCAGTG
USP7_19	TAGGAATTTCACACCTTTCTCTGCTTCCTCCTCCTAAGTTTCGAGCTGGACTCAGTG
USP7_20	TAATTTGGGTATGGTGCCCTCTACACAGGCCTCCTAAGTTTCGAGCTGGACTCAGTG
USP7_21	GGTTGGCATCATGTACACAGCCTTTCGTCCTCCTAAGTTTCGAGCTGGACTCAGTG
USP7_22	TCCCTGATTCTTTAAGCCGACGTAGCCCCTCCTAAGTTTCGAGCTGGACTCAGTG
USP7_23	TTTATTATCTTCAGCACTGCTTGTGCATGGCCTCCTAAGTTTCGAGCTGGACTCAGTG
USP7_24	AGAATCCTACGCTTTTTTGGTGTGGTCTGTCCCTCCTAAGTTTCGAGCTGGACTCAGTG
USP7_25	TCTGAGTAATTCTTGGTGGGTCATCTGTATCCCTCCTAAGTTTCGAGCTGGACTCAGTG
PCBP2_1	CTACACAGATGGATCATGGGTGGTGGTGAACCTCCTAAGTTTCGAGCTGGACTCAGTG
PCBP2_2	AGGGATTATGGATGAATCTGCATTGTTCTAGCCCTCCTAAGTTTCGAGCTGGACTCAGTG
PCBP2_3	TGTGGAATGGCATACTGTCCTTGAATGGTATCCTCCTAAGTTTCGAGCTGGACTCAGTG
PCBP2_4	TTGATCTTGCATCCACCTTTTCCAATGAGACCTCCTAAGTTTCGAGCTGGACTCAGTG
PCBP2_5	GTGGGTCCAGCCAAAGTGATAATTCTCTCACCTCCTAAGTTTCGAGCTGGACTCAGTG
PCBP2_6	GTAGATCCTTCCACTGGGTTCGCAATTTTGCCTCCTAAGTTTCGAGCTGGACTCAGTG
PCBP2_7	CGCTCAGTTGAGTTGGGTAGCATATCCCCCTCCTAAGTTTCGAGCTGGACTCAGTG
PCBP2_8	TATTGGTCATAGAGCTGCTTATGTCCTCTTCCTCCTAAGTTTCGAGCTGGACTCAGTG
PCBP2_9	AATTCCCTTCTGAGATGTTGATACGTGCACCCTCCTAAGTTTCGAGCTGGACTCAGTG
PCBP2_10	TTCTTTCCGATGATACTGCCAACTTCCTCCTCCTAAGTTTCGAGCTGGACTCAGTG
PCBP2_11	CGAGCAGTGTTCTGGGGAGCTGGACTTTCCTCCTAAGTTTCGAGCTGGACTCAGTG
PCBP2_12	GGTCAAGTCTTTGGTCACTGGTTGGGGGTGCCTCCTAAGTTTCGAGCTGGACTCAGTG
PCBP2_13	ACATTGATTAGATATTGAGCCAGGCTAATGCCCTCCTAAGTTTCGAGCTGGACTCAGTG
PCBP2_14	GTGAGTTCATGAGAAGTAGTCTGAGCAGATGCCCTCCTAAGTTTCGAGCTGGACTCAGTG
PCBP2_15	ATGATGGATTGTGGAATGCCAGCAATAGTGATCCTCCTAAGTTTCGAGCTGGACTCAGTG
PCBP2_16	TCAATGATCATAGCAAAGGCTTTGAAGATGGCCCTCCTAAGTTTCGAGCTGGACTCAGTG
PCBP2_17	ATGCATAAGTAGCCGGATGGTGAGAGTGACACCTCCTAAGTTTCGAGCTGGACTCAGTG
PCBP2_18	CTGACCACCTGCAAAGATGACCGGAGAGCCTCCTAAGTTTCGAGCTGGACTCAGTG
PCBP2_19	TCCGTTTACTCTGTTTACACATTTTGCACTTGCCTCCTAAGTTTCGAGCTGGACTCAGTG
PCBP2_20	TGAGGTTTCTCAGGTGGCAATGTAACTCATTTCCTCCTAAGTTTCGAGCTGGACTCAGTG
PCBP2_21	CCTGTCTTAAGGCCCAGGGGGAGGTTAGCCTCCTAAGTTTCGAGCTGGACTCAGTG
PCBP2_22	CGGGGTGCTGTTTAAGTCCCTGCTTTTATCCTCCTAAGTTTCGAGCTGGACTCAGTG
PCBP2_23	CTCCGGACTTTATCTGAGGTGTCTGGAGAACCTCCTAAGTTTCGAGCTGGACTCAGTG
PCBP2_24	GTCTAATCCTCAATCTTTTGGGCACAAGTTTTCCTCCTAAGTTTCGAGCTGGACTCAGTG
CCNL2_1	AGAGAGTTGTGTTTATTCACCATGTCATACGCCCTCCTAAGTTTCGAGCTGGACTCAGTG
CCNL2_2	ATAGGGAACCTCTATTTAGGAGCTGGTGGCCCTCCTAAGTTTCGAGCTGGACTCAGTG
CCNL2_3	ATTATCTTATGAGGATGCTTCACATGGACGCCCTCCTAAGTTTCGAGCTGGACTCAGTG
CCNL2_4	AAACGGAGCTTGTCGTCAGGCAGGAGGCCCTCCTAAGTTTCGAGCTGGACTCAGTG
CCNL2_5	GCTGACGGGATTCAAGTTCTGAGTTTTCATACCCTCCTAAGTTTCGAGCTGGACTCAGTG
CCNL2_6	CACTTTTTCATTGAGCTGCCCTCAGAGCCCTCCTAAGTTTCGAGCTGGACTCAGTG
CCNL2_7	CGCTGATCTCTGTAGTAATGACTTTTCTTCTTCCTCCTAAGTTTCGAGCTGGACTCAGTG
CCNL2_8	AAGAACTCCGGCTCCGAGACTTGTGTGGCCTCCTAAGTTTCGAGCTGGACTCAGTG
CCNL2_9	GTGCTTTCTTTTTTCCACTTCACCCTCCCCTCCTAAGTTTCGAGCTGGACTCAGTG
CCNL2_10	AAGCAGATTTCCTGAATTTCTTCTTCAGTTGCCCTCCTAAGTTTCGAGCTGGACTCAGTG
CCNL2_11	CGAAGACGTCGGTGCGAAGGCTGTCGTTCCCTCCTAAGTTTCGAGCTGGACTCAGTG
CCNL2_12	AATTCCATGAGGTCTGGACCAGGTGTTGGCCTCCTAAGTTTCGAGCTGGACTCAGTG
CCNL2_13	CTTTTTGTCTCTCAGCTGTCGAAGGCGGTCCTCCTAAGTTTCGAGCTGGACTCAGTG
CCNL2_14	CACATTGATGACGTCCCGTATGCGTCTTGCCTCCTAAGTTTCGAGCTGGACTCAGTG
CCNL2_15	CTCTTCTATCTTGGAAGCCAGGTGGACACCTCCTAAGTTTCGAGCTGGACTCAGTG
CCNL2_16	CCTGGACACTTTCACAAGCACACAGAACGCCTCCTAAGTTTCGAGCTGGACTCAGTG
CCNL2_17	ACGTGGAGAGAGAATAAGGGGCAGTTAAGGCCCCTCCTAAGTTTCGAGCTGGACTCAGTG
CCNL2_18	GTGTGAGATCAACCTTTTTCCGAGCATAAAGCCCTCCTAAGTTTCGAGCTGGACTCAGTG
CCNL2_19	AAAGAAACCAATGGGGACGATTGGGCAAAGGGCCTCCTAAGTTTCGAGCTGGACTCAGTG
CCNL2_20	GCTCACACTCTAACACCTGAAGGTACATCCTCCTAAGTTTCGAGCTGGACTCAGTG
CCNL2_21	ACCCAACTCTTTGAGAACTCGTCTTTCCGCCTCCTAAGTTTCGAGCTGGACTCAGTG
CCNL2_22	AACATAATCTTGATCCAGTAGTAGAGGCACGGCCTCCTAAGTTTCGAGCTGGACTCAGTG
SMC1A_1	CTTGAGAGAGATGACGATGGCCTGGAAGTTGCCTCCTAAGTTTCGAGCTGGACTCAGTG
SMC1A_2	CAGGACGAAGAAGGGGGCTGGCTTGTAGCCCTCCTAAGTTTCGAGCTGGACTCAGTG
SMC1A_3	CAGGGCCTTATAGATCTCATCAATGTTGGTACCTCCTAAGTTTCGAGCTGGACTCAGTG
SMC1A_4	TGATTCTCAAACTCCAAACGCTTCTTGGCCCTCCTAAGTTTCGAGCTGGACTCAGTG
SMC1A_5	AATTAAACTGTGTGTCCTCTTCAGCCTTCACCTCCTAAGTTTCGAGCTGGACTCAGTG
SMC1A_6	ATGAGAATGCCCAACTTCTCTAATTCCTCCCTCCTAAGTTTCGAGCTGGACTCAGTG
SMC1A_7	GATTTGACTTACCAGAGCCATTGGGTCCACCTCCTAAGTTTCGAGCTGGACTCAGTG
SMC1A_8	GGCGGTGAACCTCTGAAATGGTCCGATAATCCTCCTAAGTTTCGAGCTGGACTCAGTG
SMC1A_9	GACCCTTGTACGACTTAAAGTTCTCAATCTCCCTCCTAAGTTTCGAGCTGGACTCAGTG
SMC1A_10	GGTACTTGGTGAGGTCGAAGGTCAGGACTTTCCTCCTAAGTTTCGAGCTGGACTCAGTG
SMC1A_11	AATGAGGCTCTCGGCCTTGGTGTAGAACCCTCCTAAGTTTCGAGCTGGACTCAGTG
SMC1A_12	CGACTGCTCCTTGATGTAATTTGCCACCCCTCCTAAGTTTCGAGCTGGACTCAGTG
SMC1A_13	TTGATGCCATCCAAGTAGGGCTCTTCAGCCTCCTAAGTTTCGAGCTGGACTCAGTG
SMC1A_14	GAGGTCTCCTGGAACTTGTCTCGGACACCCTCCTAAGTTTCGAGCTGGACTCAGTG
SMC1A_15	CCGTAGTCAATCTCAATGAGGGCCTCTCCCTCCTAAGTTTCGAGCTGGACTCAGTG
SMC1A_16	TCCATGGTGCCTTTTGACAGTGGCAACTCCTCCTAAGTTTCGAGCTGGACTCAGTG
SMC1A_17	CTCAATGGCTGTCACCTCCTTCTGTAAACCTCCTAAGTTTCGAGCTGGACTCAGTG
SMC1A_18	ATGTGTACTTTATCTTGGTCCTCCTTCAGTCCTCCTAAGTTTCGAGCTGGACTCAGTG
SMC1A_19	CATTCTGCCGTTTCACCTTTTCTTCCTCCCTCCTAAGTTTCGAGCTGGACTCAGTG
SMC1A_20	GATTTTTCCTGCAGATTCAGGGCTAGATGTCCCTCCTAAGTTTCGAGCTGGACTCAGTG
SMC1A_21	TTGGTCTGTTCTAGGTCACTCTGGGAGTACCCTCCTAAGTTTCGAGCTGGACTCAGTG
SMC1A_22	TCCTTCTTCTCTTTCAACTTGTCTACTGCCCTCCTAAGTTTCGAGCTGGACTCAGTG
SMC1A_23	GCAGGGCCTTTTTGATATGAGGTGGCTCCCTCCTAAGTTTCGAGCTGGACTCAGTG
SMC1A_24	AATCTGATACTTCTTTTGTGTGGGCTGGCACCTCCTAAGTTTCGAGCTGGACTCAGTG
SMC1A_25	AAGGCGCTTGATGCTTTCCATTATCTCTCCTCCTAAGTTTCGAGCTGGACTCAGTG
SMC1A_26	GCTTGCTAGTGGTGATGTATTCCTCCAGCCTCCTAAGTTTCGAGCTGGACTCAGTG
SMC1A_27	CAATCCGCTTCTGATTCTCTTCAATTTCCCCTCCTAAGTTTCGAGCTGGACTCAGTG
SMC1A_28	TCAGCTTTCTGGTCTCGATTGAATTTCTCCCCTCCTAAGTTTCGAGCTGGACTCAGTG
SMC1A_29	GTGGTATTTCTTCACCTGATTCTCCTCCCCTCCTAAGTTTCGAGCTGGACTCAGTG
SMC1A_30	TTCTTGTAGTGCTTCTGAGCATTCTGCAGACCTCCTAAGTTTCGAGCTGGACTCAGTG
SRRM2_1	ATCCTGTGCTGGAGGGAGAAGAGACTGTGCCTCCTAAGTTTCGAGCTGGACTCAGTG
SRRM2_2	GGTGAGGTTTGCACCAGACAATGCTGGAGCCTCCTAAGTTTCGAGCTGGACTCAGTG
SRRM2_3	AAGTGCAATCCTGGACTGAGCATGATTTTCCCTCCTAAGTTTCGAGCTGGACTCAGTG
SRRM2_4	ATCTGCAGCGATCAAGAGGTGTTGGGGACCCTCCTAAGTTTCGAGCTGGACTCAGTG
SRRM2_5	ATGGCTGGAGGAGATCTTGTTAAGGACCGTCCTCCTAAGTTTCGAGCTGGACTCAGTG
SRRM2_6	AGGGGATGCACTGGGTTTCACATCAAGTTCCCTCCTAAGTTTCGAGCTGGACTCAGTG
SRRM2_7	AAGAATCACATTCGCTTCTCCCTCTAGATCCTCCTAAGTTTCGAGCTGGACTCAGTG
SRRM2_8	TGTTCTGGGTACAGCATCAAGCACAGGTGCCTCCTAAGTTTCGAGCTGGACTCAGTG
SRRM2_9	GTATCTGGTGAGGAGGACCCAGAATGACTGCCTCCTAAGTTTCGAGCTGGACTCAGTG
SRRM2_10	TGGCAACAATCTGGATTCCACATTGGAGCCCTCCTAAGTTTCGAGCTGGACTCAGTG
SRRM2_11	TTTAGGGCATGGGGAAGACCCTGAAAGGCCCTCCTAAGTTTCGAGCTGGACTCAGTG
SRRM2_12	CACTTCGAGACCGACTGCGGGAAGTATCGCCTCCTAAGTTTCGAGCTGGACTCAGTG
SRRM2_13	AACAAGGCTGTAAGGTTTGGGAGGCTCAGGCCTCCTAAGTTTCGAGCTGGACTCAGTG
SRRM2_14	CCAAAGGCAGCACGGAGTCTTTCATTCTTCCTCCTAAGTTTCGAGCTGGACTCAGTG
SRRM2_15	CAGATGTTCTCTGGTGGTCAGGTATTCGGGCCTCCTAAGTTTCGAGCTGGACTCAGTG
SRRM2_16	GAGAGCGGGACCTTCTTCGAGTTACTGGACCTCCTAAGTTTCGAGCTGGACTCAGTG
SRRM2_17	ATGTTCTGGATCTTGATCTTCTGCGAGTGACCTCCTAAGTTTCGAGCTGGACTCAGTG
SRRM2_18	TCACTGGTGGAGTTCTAGAACGGGAGCGGCCTCCTAAGTTTCGAGCTGGACTCAGTG
SRRM2_19	TTGTTTTCTCTCTCCTTGAGCGGGAACGGCCTCCTAAGTTTCGAGCTGGACTCAGTG
SRRM2_20	GCGAGTTTCTGGTGAGGATGAGGCAGAGCCCTCCTAAGTTTCGAGCTGGACTCAGTG
SRRM2_21	CTTCTTTCTCTCTGGGGGGTAAGACACTTGCCTCCTAAGTTTCGAGCTGGACTCAGTG
SRRM2_22	CCTAGGAGTCTGAGGCAAAGCTTTCGGTTCCCTCCTAAGTTTCGAGCTGGACTCAGTG
SRRM2_23	CTTCATCTTGGCTTGACGTAGGCAATGCACCTCCTAAGTTTCGAGCTGGACTCAGTG
SRRM2_24	TTGCTCTTTTGTTTCTGGAGATGACCCAGCCCTCCTAAGTTTCGAGCTGGACTCAGTG
SRRM2_25	TTCTTTCCCTTGGCGGGGTTCTAAGTGTGCCTCCTAAGTTTCGAGCTGGACTCAGTG
SRRM2_26	TCTGGGAGGTGTGCTAGATTTCACTCTAGGCCTCCTAAGTTTCGAGCTGGACTCAGTG
SRRM2_27	GCTGGAGCAGGTTTAGGACTTTCTGGGGACCTCCTAAGTTTCGAGCTGGACTCAGTG
SRRM2_28	CCCAGCCAAGGCAGTTGTATGAGTTTTAGCCCTCCTAAGTTTCGAGCTGGACTCAGTG
SRRM2_29	CTCTTTGGAGTGGGAGACCTATGCTTACGTCCTCCTAAGTTTCGAGCTGGACTCAGTG
SRRM2_30	CATTTAATTCTGCCAACTGGTGAGTCTCCGCCTCCTAAGTTTCGAGCTGGACTCAGTG
PKD1_1	CTTCTTCCTTGGCCAGGAAGAGTGCAAAGCCTCCTAAGTTTCGAGCTGGACTCAGTG
PKD1_2	TCTGATGCTGAGAAGGATTTGGCAGGCGACCTCCTAAGTTTCGAGCTGGACTCAGTG
PKD1_3	CAGCAGCGTATAGTTGAGCTGCAGATGCCCTCCTAAGTTTCGAGCTGGACTCAGTG
PKD1_4	GAAGGTGCCCACGGAGCGGAAGGTGTAAGCCTCCTAAGTTTCGAGCTGGACTCAGTG
PKD1_5	ATGTTGTTGGACGCGGTGACTGTCACAAGACCTCCTAAGTTTCGAGCTGGACTCAGTG
PKD1_6	AAGGTCCAGTCGAAGAGGTAGTGGGCCGGCCTCCTAAGTTTCGAGCTGGACTCAGTG
PKD1_7	CTAAGTGCTGCTGGGGTGGACCTTGTTCCCTCCTAAGTTTCGAGCTGGACTCAGTG
PKD1_8	TTGAGTCGGTCAAACTGGGTGAGCAGGGCCCTCCTAAGTTTCGAGCTGGACTCAGTG
PKD1_9	CTGAGCAGGTCCGTTTCCATGTGGGTGTCCTCCTAAGTTTCGAGCTGGACTCAGTG
PKD1_10	TTGGTGGAGACGGTGTAGTTGCTGATATAGCCCTCCTAAGTTTCGAGCTGGACTCAGTG
PKD1_11	GCATGAGGGCAGAGGTCAGGTTGTAGGCCCTCCTAAGTTTCGAGCTGGACTCAGTG
PKD1_12	CCTGTGATGTTGAGGATGCTGTCTCCGACCTCCTAAGTTTCGAGCTGGACTCAGTG
PKD1_13	TGATGTTCTTGCGTATCTGGGCTCGGTGCCTCCTAAGTTTCGAGCTGGACTCAGTG
PKD1_14	CACCAGCGTCTTGTTGCTGAACGTACGTGCCTCCTAAGTTTCGAGCTGGACTCAGTG
PKD1_15	GGGCAGCGTAGGTGTGCATGACATTGTGCCTCCTAAGTTTCGAGCTGGACTCAGTG
PKD1_16	GTTGTACGGAGGCTGGAACTGGTGGAGGGCCTCCTAAGTTTCGAGCTGGACTCAGTG
PKD1_17	TAGTTCACGGTGACGTTGCTCACGTGGTTGCCTCCTAAGTTTCGAGCTGGACTCAGTG
PKD1_18	TGCTTGTCGTTGATGGTCCACCGGAAGACCTCCTAAGTTTCGAGCTGGACTCAGTG
PKD1_19	ATCCAGAAACAAGTCACTCTTCATCTGTCCCCTCCTAAGTTTCGAGCTGGACTCAGTG
PKD1_20	AGGATGGCCAGGTAGACGGGATAGACAACCCTCCTAAGTTTCGAGCTGGACTCAGTG
PKD1_21	CATATGGAGAGCCAGATGTGCTTGTCAAAGACCTCCTAAGTTTCGAGCTGGACTCAGTG
PKD1_22	AGCACATGTCAGCATGACGATGTAGTTTACACCTCCTAAGTTTCGAGCTGGACTCAGTG
PKD1_23	TGTCGGCTCAGGAAACACAAAGCGGACATCCTCCTAAGTTTCGAGCTGGACTCAGTG
PKD1_24	AAAGGGATTGGAGTCCACCAGAAAGATGAGCCCTCCTAAGTTTCGAGCTGGACTCAGTG
PKD1_25	ATGACATTGAAGACCACGTTCTGGAAGGTCACCTCCTAAGTTTCGAGCTGGACTCAGTG
PKD1_26	CGGAGCAGAGGGACAGGCAGGCAAAGGACCTCCTAAGTTTCGAGCTGGACTCAGTG
MT-ND4_1	AATGAGGATGTAAGCCCGTGGGCGATTATGCCTCCTAAGTTTCGAGCTGGACTCAGTG
MT-ND4_2	GGATGAGAATGGCTGTTACTACGAGGGCTACCTCCTAAGTTTCGAGCTGGACTCAGTG
MT-ND4_3	ACATGGGCTTTAGGGAGTCATAAGTGGAGTCCCTCCTAAGTTTCGAGCTGGACTCAGTG
MT-ND4_4	AGCTAGTCATATTAAGTTGTTGGCTCAGGAGTCCTCCTAAGTTTCGAGCTGGACTCAGTG
MT-ND4_5	TTATGTTGTTAATGTGGTGGGTGAGTGAGCCCCCTCCTAAGTTTCGAGCTGGACTCAGTG
MT-ND4_6	GTGCGTTCGTAGTTTGAGTTTGCTAGGCAGAACCTCCTAAGTTTCGAGCTGGACTCAGTG
MT-ND4_7	ATGAGCGATTTTAGGTCTGTTTGTCGTAGGCACCTCCTAAGTTTCGAGCTGGACTCAGTG
MT-ND4_8	TTTTGTCAGGGGGTTGAGAATGAGTGTGAGGCCCTCCTAAGTTTCGAGCTGGACTCAGTG
MT-ND4_9	AGCCTAGGGTGTTGTGAGTGTAAATTAGTGCGCCTCCTAAGTTTCGAGCTGGACTCAGTG
MT-ND4_10	AAGTATGTGCCTGCGTTCAGGCGTTCTGCCTCCTAAGTTTCGAGCTGGACTCAGTG
MT-ND4_11	GTTGCCTCATCGGGTGATGATAGCCAAGCCTCCTAAGTTTCGAGCTGGACTCAGTG
MT-ND4_12	TTTCGTGATAGTGGTTCACTGGATAAGTGGCGCCTCCTAAGTTTCGAGCTGGACTCAGTG
MT-ND4_13	CTTGCCATGATTGTGAGGGGTAGGAGTCAGCCTCCTAAGTTTCGAGCTGGACTCAGTG
MT-ND4_14	TAGTATTAGGAGGGGGGTTGTTAGGGGGTCGGCCTCCTAAGTTTCGAGCTGGACTCAGTG
MT-ND4_15	TTCTCCCAGTAGGTTAATAGTGGGGGGTAAGGCCTCCTAAGTTTCGAGCTGGACTCAGTG
PLXNB2_1	TCTTGACGCCACCTGTGAAGTTCTCAAAGCCTCCTAAGTTTCGAGCTGGACTCAGTG
PLXNB2_2	GTGAACTGGACATTGGGAGGCGAACGGCCCTCCTAAGTTTCGAGCTGGACTCAGTG
PLXNB2_3	ACTGGTAGGACGTGAGGAAGATGTTGCCTCCCTCCTAAGTTTCGAGCTGGACTCAGTG
PLXNB2_4	TGACTCTCTTGTTTATCTCCACAAGGATAGAGCCTCCTAAGTTTCGAGCTGGACTCAGTG
PLXNB2_5	TCAGAGGTCAGTGACCTTGTTCTCCAGTGCCTCCTAAGTTTCGAGCTGGACTCAGTG
PLXNB2_6	CGTCATAGTACTTCTGCGTGTATTGGTAGAGCCCTCCTAAGTTTCGAGCTGGACTCAGTG
PLXNB2_7	GAGTGCCACGAGGGTGTTCAAGGAGTCCCCTCCTAAGTTTCGAGCTGGACTCAGTG
PLXNB2_8	CACCATCTTCTTGTAGGTGGAGATCTCCCCTCCTAAGTTTCGAGCTGGACTCAGTG
PLXNB2_9	TACAGCAGCTTGTTGCTGGGAGAATCGCCCTCCTAAGTTTCGAGCTGGACTCAGTG
PLXNB2_10	CTGTTCGTCTTCCAGATGTGGATGGTGTCTCCTCCTAAGTTTCGAGCTGGACTCAGTG
PLXNB2_11	TCCTTGACCTGGGAGATGGTGTCACAGTCCTCCTAAGTTTCGAGCTGGACTCAGTG
PLXNB2_12	CTGTCCTTGAGGTACTGGTACAGGCAGATCCTCCTAAGTTTCGAGCTGGACTCAGTG
PLXNB2_13	TGTGCATGATGTCCGTGTAGTACTCCAGTCCTCCTAAGTTTCGAGCTGGACTCAGTG
PLXNB2_14	ACGCGGTCGGTGTAGGTCTTGTAGTCCACCTCCTAAGTTTCGAGCTGGACTCAGTG
PLXNB2_15	CTCGATCATCAGGTCTGTGAATTCCTTCTTCCTCCTAAGTTTCGAGCTGGACTCAGTG
PLXNB2_16	CGGGCAGGTTGTGTGTGGTGTCTCGTTTCCCTCCTAAGTTTCGAGCTGGACTCAGTG
PLXNB2_17	TTGGTGTCATTGTGGAACACGTAGTCTGTACCCCTCCTAAGTTTCGAGCTGGACTCAGTG
PLXNB2_18	CGAAGGCTCGCAGTACGGGGTTTTCGCGCCTCCTAAGTTTCGAGCTGGACTCAGTG
PLXNB2_19	TGAAGAAGATGCCGGGGTTGGGCACGGGCCTCCTAAGTTTCGAGCTGGACTCAGTG
PLXNB2_20	GGTCACATGGAGCTTGCTGTCGATATTCTCCTCCTAAGTTTCGAGCTGGACTCAGTG
PLXNB2_21	GTGTCCAGGTTCTTGCCCTGGAAGTTCACCTCCTAAGTTTCGAGCTGGACTCAGTG
PLXNB2_22	CGAACTGCTGTGTGTTGGTGGACAGGTAGCCCTCCTAAGTTTCGAGCTGGACTCAGTG
PLXNB2_23	TTGTAGGTGGCGTGGTCCGTGTAGGCTTCCTCCTAAGTTTCGAGCTGGACTCAGTG
PLXNB2_24	TTGACATTGTCAGTCATCTCAGCCTCATGCCTCCTAAGTTTCGAGCTGGACTCAGTG
MAD2L1_1	AGGTGACGAAACACTCCTTTTGATATGCTTGCCTCCTAAGTTTCGAGCTGGACTCAGTG
MAD2L1_2	ATATTTGTTGCCAGGAATTCCAATGCTGAGTCCTCCTAAGTTTCGAGCTGGACTCAGTG
MAD2L1_3	AGGGTCTCTTTTTTAAAGGAGAGCCCATACCCCTCCTAAGTTTCGAGCTGGACTCAGTG
MAD2L1_4	ACATTCTGTTTGAGATACTATGGATGGAGGCCCTCCTAAGTTTCGAGCTGGACTCAGTG
MAD2L1_5	CACAAGCATTCTCACAGAGGTTTGACTTCTCCCTCCTAAGTTTCGAGCTGGACTCAGTG
MAD2L1_6	CTTTCAGCTGTTGATTTAAACATCATCCTCCCCTCCTAAGTTTCGAGCTGGACTCAGTG
MAD2L1_7	ACTTGGAGCTACAGGGCAAAGCTTTTCCACCTCCTAAGTTTCGAGCTGGACTCAGTG
MAD2L1_8	ATTGACAGGAATTTTGTAGGCCACCATGCTCCTCCTAAGTTTCGAGCTGGACTCAGTG
MAD2L1_9	GTCATCTTTTGCAGTCTTGTCACACTCAATACCTCCTAAGTTTCGAGCTGGACTCAGTG
MAD2L1_10	TGTATAACCAATCTTTCAGTTGTTCCACCACCCTCCTAAGTTTCGAGCTGGACTCAGTG
MAD2L1_11	AGTTACAAGCAAGGTGAGTCCGTATTTCTGCCCTCCTAAGTTTCGAGCTGGACTCAGTG
MAD2L1_12	GGAGTCAGGATGAACTTCCTTGGCTAGGGCCTCCTAAGTTTCGAGCTGGACTCAGTG
MAD2L1_13	GACCTTGATGGGCTTAACCTCTGTTCATCCTCCTAAGTTTCGAGCTGGACTCAGTG
MAD2L1_14	TGCCACTTTTCTTGAAATCATCTAGGTTGGTCCTCCTAAGTTTCGAGCTGGACTCAGTG
MAD2L1_15	AAACTGTGGTCCCGACTCTTCCCATTTTCCTCCTAAGTTTCGAGCTGGACTCAGTG
MAD2L1_16	CTGTGATCTGTCTGATCACTGAACGGATTTCCCTCCTAAGTTTCGAGCTGGACTCAGTG
MAD2L1_17	TGGATAGCTTTCTGAGACTTTTCTCTGGGTGCCTCCTAAGTTTCGAGCTGGACTCAGTG
MAD2L1_18	TGGTCAAAGTCATCTGACAACAGACTATCTGCCTCCTAAGTTTCGAGCTGGACTCAGTG
MAD2L1_19	AACCACAATACAATTTGCATACTTCCTTGGCCCTCCTAAGTTTCGAGCTGGACTCAGTG
MAD2L1_20	TTTTTATGGCATCACATGCCAAAGAACCTCCCTCCTAAGTTTCGAGCTGGACTCAGTG
MAD2L1_21	TTACGGTATCAAATGCTCTGAACTAGGGAGGCCTCCTAAGTTTCGAGCTGGACTCAGTG
MAD2L1_22	TACATATGGTAAGCAACACTGAGCCAGAGTCCCTCCTAAGTTTCGAGCTGGACTCAGTG
MAD2L1_23	ACCTTCTCTTTAACATGGTGTAGAAACCACTCCTCCTAAGTTTCGAGCTGGACTCAGTG
MAD2L1_24	AAGCCTCAAGGTCTAGAAAGAGGATGGGACACCTCCTAAGTTTCGAGCTGGACTCAGTG
MAD2L1_25	ACAAATTTGTCACTGAGAACCCAGAAACTGCCCTCCTAAGTTTCGAGCTGGACTCAGTG
MAD2L1_26	ACTTTACAAATCTGCCTTAAACTGACCTTGGCCTCCTAAGTTTCGAGCTGGACTCAGTG
MAD2L1_27	ACTGGATAGAAAGCATGTACCAGATGAGGGTCCTCCTAAGTTTCGAGCTGGACTCAGTG
MAD2L1_28	ATCCATTAGATTGAAGACACCTCAAGACTCACCTCCTAAGTTTCGAGCTGGACTCAGTG
MAD2L1_29	AATGAACGAAGGCGGACTTCCTCAGAATTGGCCTCCTAAGTTTCGAGCTGGACTCAGTG
MAD2L1_30	AGAAACTTCCAACAGTGGCAGAAATGTCACCCCTCCTAAGTTTCGAGCTGGACTCAGTG
MORF4L2_1	CTCATCAAGGGGCGTATAGGCCAACATTGCCTCCTAAGTTTCGAGCTGGACTCAGTG
MORF4L2_2	TTCTTAAACGCCTCCTCACTTTCAACAGTGCCTCCTAAGTTTCGAGCTGGACTCAGTG
MORF4L2_3	AGGTTGAGAACCCTGCTTTCTGGAACTCACCTCCTAAGTTTCGAGCTGGACTCAGTG
MORF4L2_4	CCCTGTTTTTATTCCAACCAACAATCTTCCCCTCCTAAGTTTCGAGCTGGACTCAGTG
MORF4L2_5	ATAGATCTTCTGGGATGGTCTAGAAGGGTGACCTCCTAAGTTTCGAGCTGGACTCAGTG
MORF4L2_6	TCCAAGATTCTGTAATCAGGGAAGGTTCTGCCCTCCTAAGTTTCGAGCTGGACTCAGTG
MORF4L2_7	GGATCAGATCTCCTGATCCTCACTATACCCTCCTAAGTTTCGAGCTGGACTCAGTG
MORF4L2_8	TGCATTGCCTCTATCATGTTAGAACGTGCCCTCCTAAGTTTCGAGCTGGACTCAGTG
MORF4L2_9	TTCTTGGCAGGGAGTTGAAACAGCTGCTTCCCTCCTAAGTTTCGAGCTGGACTCAGTG
MORF4L2_10	CTGCTTGTTCTTTCTGGTCTTCCTCACGCCTCCTAAGTTTCGAGCTGGACTCAGTG
MORF4L2_11	ATCTTCCTGGGAGAGCTGGTTCAAGATTTTTCCTCCTAAGTTTCGAGCTGGACTCAGTG
MORF4L2_12	TTTGAAGTTCTCTTCTTCTGCAGATTGCTGTCCTCCTAAGTTTCGAGCTGGACTCAGTG
MORF4L2_13	ACTTAGCTTTTCTGATGGTGACCTTTGCGTCCTCCTAAGTTTCGAGCTGGACTCAGTG
MORF4L2_14	TGTGAGTAAGGTTTATACCTCTCGAGTCTGCCCTCCTAAGTTTCGAGCTGGACTCAGTG
MORF4L2_15	ATGCCTAAGAACAACATAGATGGACTTGCAGCCTCCTAAGTTTCGAGCTGGACTCAGTG
MORF4L2_16	AAGTTGAACCTTTGGCACTAGGAATCAGGGCCCTCCTAAGTTTCGAGCTGGACTCAGTG
MORF4L2_17	GTGTAGTGTCAAAGGGATAGGAACCACCAGCCCTCCTAAGTTTCGAGCTGGACTCAGTG
MORF4L2_18	TGTTCTAATTACTGCATACACTGGTAGCAACCCTCCTAAGTTTCGAGCTGGACTCAGTG
MORF4L2_19	ATCATGCAAATAGCCCAACAATAATGCAAGGCCTCCTAAGTTTCGAGCTGGACTCAGTG
MORF4L2_20	TACAAATAATCTCAGTAGGTGTGGTGCTCCACCTCCTAAGTTTCGAGCTGGACTCAGTG
MORF4L2_21	GGTAACTAAGTCCCAGTCCTCAACAAGCCCCTCCTAAGTTTCGAGCTGGACTCAGTG
MORF4L2_22	CCTCTCATTTTACTTCTCTGCATGTTGCCCTCCTAAGTTTCGAGCTGGACTCAGTG
MORF4L2_23	TCCCTTCCAAGAACTCCTAGTGATTTCCCCTCCTAAGTTTCGAGCTGGACTCAGTG
PRDX3_1	TCAGGACCGTTGATCAGAAGCTTTCAATGTGCCTCCTAAGTTTCGAGCTGGACTCAGTG
PRDX3_2	AAAGCAGGTTTCAACTGTGGTTCTTCTCTCACCTCCTAAGTTTCGAGCTGGACTCAGTG
PRDX3_3	TACCTTCTGAAAGTACTCTTTGGAAGCAGCTCCTCCTAAGTTTCGAGCTGGACTCAGTG
PRDX3_4	TCAAATGCTTGATGACTCCATTGGGGTCAACCTCCTAAGTTTCGAGCTGGACTCAGTG
PRDX3_5	AAGTCTGACAAGAGTGCGATGTTCATGTGGCCCTCCTAAGTTTCGAGCTGGACTCAGTG
PRDX3_6	TTAGGTCTTTGAACTCTCCATTGACAACGGCCCTCCTAAGTTTCGAGCTGGACTCAGTG
PRDX3_7	ATAAATTTGTCAAGCTCGTTCTTCCACATGCCCTCCTAAGTTTCGAGCTGGACTCAGTG
PRDX3_8	TTGGCTTGATCGTAGGAGAATCCGGTGTCCCCTCCTAAGTTTCGAGCTGGACTCAGTG
PRDX3_9	CCCTTAAAATAGGGTGCATGCTGGGTGACCCTCCTAAGTTTCGAGCTGGACTCAGTG
PRDX3_10	AAACTCAATTTCAGGGATGAGGGATCATGCACCTCCTAAGTTTCGAGCTGGACTCAGTG
PRDX3_11	ACATAAACATTCATTGCAGGAGTTACACGGCCCTCCTAAGTTTCGAGCTGGACTCAGTG
PRDX3_12	TCCATTGAGACATGATCTAAGAATAGCCTTCCCTCCTAAGTTTCGAGCTGGACTCAGTG
PRDX3_13	ATTATGTTCTGTAGAAACTAGCTAGCCAGCCCCTCCTAAGTTTCGAGCTGGACTCAGTG
PRDX3_14	AAGGATTCCTTGTACTAGCAACTAACCATGTCCTCCTAAGTTTCGAGCTGGACTCAGTG
PRDX3_15	AGAAGGTGCAGATACACATGGGTGATCTACTCCTCCTAAGTTTCGAGCTGGACTCAGTG
PRDX3_16	GAAGAGACCTCTTAGTGCAAGACCAGAACCCCTCCTAAGTTTCGAGCTGGACTCAGTG
PRDX3_17	ACCACCATTCTTTCTTGGTGTATTTATCCAGCCTCCTAAGTTTCGAGCTGGACTCAGTG
PRDX3_18	GATGGCTAAAGTGGGAATCCACTGAGACTGCCTCCTAAGTTTCGAGCTGGACTCAGTG
PRDX3_19	CAAGGAATGGCACTCACATGTCGGGCAACCTCCTAAGTTTCGAGCTGGACTCAGTG
PRDX3_20	AACAGCACACCGTAGTCTCGGGAAATCTGCCTCCTAAGTTTCGAGCTGGACTCAGTG
