# Supplementary material for: Profiling stress-triggered RNA condensation with photocatalytic proximity labeling
Source: Research Square preprint supplement (doi:10.21203/rs.3.rs-2513504/v1), 2023-02-14
Supplement: Supplementary file 2 [file 9dd91e33ef56624974ea73c0.xlsx]

## Sheet: A-arsenite_U-2 OS
arsenite-stressed U-2 OS					G3BP1 vs. untargeted				post- vs. pre- enrichment				label vs. omit probe
geneName	geneID	geneType	SG-proximity?	SG-excluded?	log2FC	padj	enriched?	depleted?	log2FC	padj	enriched?	depleted?	log2FC	padj	enriched?
TSPAN6	ENSG00000000003	protein_coding	0	0	0.35334	0.0975251	0	0	1.0679	0.000528182	1	0	0.723845	0.00435332	1
TNMD	ENSG00000000005	protein_coding	0	0	NA	NA	0	0	NA	NA	0	0	NA	NA	0
DPM1	ENSG00000000419	protein_coding	0	0	0.347442	0.0960582	0	0	0.542344	0.0850809	0	0	0.62001	0.0120548	1
SCYL3	ENSG00000000457	protein_coding	0	0	-0.204526	0.747553	0	0	-0.400303	0.640289	0	0	-0.672671	0.195435	0
C1orf112	ENSG00000000460	protein_coding	0	0	0.229834	0.595346	0	0	-0.250745	0.684116	0	0	-0.783391	0.0120373	0
FGR	ENSG00000000938	protein_coding	0	0	NA	NA	0	0	-2.58625	NA	0	0	NA	NA	0
CFH	ENSG00000000971	protein_coding	0	0	-1.26178	NA	0	0	-0.0430991	NA	0	0	0.586932	NA	0
FUCA2	ENSG00000001036	protein_coding	0	0	0.396922	0.059501	0	0	0.512049	0.121091	0	0	0.211185	0.45068	0
GCLC	ENSG00000001084	protein_coding	1	0	0.572241	8.3903e-05	1	0	0.660455	0.0034304	1	0	1.09479	1.10943e-08	1
NFYA	ENSG00000001167	protein_coding	1	0	0.881325	2.36097e-13	1	0	1.25872	1.11967e-11	1	0	1.38623	3.88683e-17	1
STPG1	ENSG00000001460	protein_coding	0	0	-0.702594	0.200003	0	0	-0.114306	0.930107	0	0	0.469332	0.905419	0
NIPAL3	ENSG00000001461	protein_coding	0	0	-0.60006	0.0986078	0	0	0.304045	0.722762	0	0	0.210999	0.741369	0
LAS1L	ENSG00000001497	protein_coding	1	0	0.385653	0.00249418	1	0	0.714939	0.000102243	1	0	0.874902	1.20573e-08	1
ENPP4	ENSG00000001561	protein_coding	0	0	0.46737	0.22224	0	0	1.03887	0.054039	0	0	1.14784	0.0116876	1
SEMA3F	ENSG00000001617	protein_coding	0	0	0.947705	2.56384e-05	1	0	-0.0744007	0.884345	0	0	-0.144646	0.617787	0
CFTR	ENSG00000001626	protein_coding	0	0	-2.29695	NA	0	0	NA	NA	0	0	-5.82577	0.395796	0
ANKIB1	ENSG00000001629	protein_coding	0	0	0.0685438	0.701821	0	0	0.2801	0.243746	0	0	0.45794	0.00511727	1
CYP51A1	ENSG00000001630	protein_coding	0	0	1.54581	0.0252418	1	0	0.164739	0.894394	0	0	-0.38311	0.602077	0
KRIT1	ENSG00000001631	protein_coding	0	0	0.14225	0.650906	0	0	0.237397	0.619335	0	0	0.211977	0.542213	0
RAD52	ENSG00000002016	protein_coding	0	0	-0.576023	0.0870199	0	0	-0.523812	0.346082	0	0	0.234656	0.677408	0
MYH16	ENSG00000002079	unitary_pseudogene	0	0	-1.03338	NA	0	0	-1.5641	0.52082	0	0	-0.126528	NA	0
BAD	ENSG00000002330	protein_coding	0	0	-0.165226	0.858581	0	0	-0.604558	0.541143	0	0	0.0410849	0.969053	0
LAP3	ENSG00000002549	protein_coding	0	0	0.367448	0.0780073	0	0	0.451028	0.175314	0	0	0.39304	0.145043	0
CD99	ENSG00000002586	protein_coding	0	0	0.0077523	0.982044	0	0	-0.0234253	0.962275	0	0	0.0530848	0.8764	0
HS3ST1	ENSG00000002587	protein_coding	0	0	NA	NA	0	0	NA	NA	0	0	-5.26449	NA	0
AOC1	ENSG00000002726	protein_coding	0	0	NA	NA	0	0	NA	NA	0	0	-3.33993	NA	0
WNT16	ENSG00000002745	protein_coding	0	0	-3.27007	NA	0	0	-2.58625	NA	0	0	-3.47269	NA	0
HECW1	ENSG00000002746	protein_coding	0	0	-0.62378	0.635252	0	0	-0.127711	0.957698	0	0	-1.11561	0.369589	0
MAD1L1	ENSG00000002822	protein_coding	0	0	0.302262	0.100901	0	0	0.13892	0.700558	0	0	0.377014	0.0923766	0
LASP1	ENSG00000002834	protein_coding	0	0	0.629082	1.90706e-14	1	0	0.247712	0.0645168	0	0	-0.238704	0.0268538	0
SNX11	ENSG00000002919	protein_coding	0	0	-0.200763	0.614724	0	0	-0.125591	0.865843	0	0	-0.362266	0.350426	0
TMEM176A	ENSG00000002933	protein_coding	0	0	-0.974921	0.587337	0	0	-1.62433	0.39122	0	0	-0.614433	0.819797	0
M6PR	ENSG00000003056	protein_coding	1	0	0.419122	0.00201395	1	0	0.550318	0.0102404	1	0	0.366707	0.0355665	1
KLHL13	ENSG00000003096	protein_coding	0	0	0.804615	0.152218	0	0	0.766227	0.409159	0	0	0.877398	0.221068	0
CYP26B1	ENSG00000003137	protein_coding	0	0	1.02013	7.10224e-06	1	0	0.652505	0.0706684	0	0	0.406793	0.167771	0
ICA1	ENSG00000003147	protein_coding	0	0	-0.081654	0.963298	0	0	0.854978	0.740203	0	0	1.46551	0.56159	0
DBNDD1	ENSG00000003249	protein_coding	0	0	0.336414	0.570307	0	0	-1.16895	0.0144574	0	1	-0.891168	0.0332336	0
ALS2	ENSG00000003393	protein_coding	0	0	0.429985	0.038073	1	0	0.497557	0.127476	0	0	0.944797	0.000216978	1
CASP10	ENSG00000003400	protein_coding	0	0	1.54914	0.38996	0	0	0.788111	0.76865	0	0	-1.08869	0.403985	0
CFLAR	ENSG00000003402	protein_coding	0	0	-0.143182	0.670445	0	0	0.0760668	0.901855	0	0	-0.00253594	0.994769	0
TFPI	ENSG00000003436	protein_coding	0	0	-0.404459	0.124293	0	0	0.536846	0.297842	0	0	0.157696	0.721206	0
NDUFAF7	ENSG00000003509	protein_coding	0	0	-0.102959	0.836665	0	0	-0.283477	0.678251	0	0	-0.0642602	0.907719	0
RBM5	ENSG00000003756	protein_coding	0	0	-0.196799	0.378925	0	0	-0.332139	0.328746	0	0	-0.442101	0.0392987	0
MTMR7	ENSG00000003987	protein_coding	0	0	-1.15641	NA	0	0	-1.63796	0.448403	0	0	-1.93553	0.262561	0
SLC7A2	ENSG00000003989	protein_coding	0	0	0.269621	0.315402	0	0	0.894278	0.0218267	1	0	0.567076	0.0626304	0
ARF5	ENSG00000004059	protein_coding	0	0	-0.253964	0.375772	0	0	-0.0880195	0.878886	0	0	-0.294525	0.378195	0
SARM1	ENSG00000004139	protein_coding	0	0	-1.67505	0.21802	0	0	-2.60517	0.048755	0	1	-2.07056	0.163998	0
POLDIP2	ENSG00000004142	protein_coding	0	0	-0.339801	0.0615264	0	0	-0.23019	0.493364	0	0	-0.528224	0.00668401	0
PLXND1	ENSG00000004399	protein_coding	0	0	0.100517	0.637084	0	0	-0.386652	0.133128	0	0	-0.104608	0.666932	0
AK2	ENSG00000004455	protein_coding	0	0	-0.118607	0.497346	0	0	0.188095	0.548205	0	0	0.102306	0.633704	0
CD38	ENSG00000004468	protein_coding	0	0	NA	NA	0	0	NA	NA	0	0	NA	NA	0
FKBP4	ENSG00000004478	protein_coding	0	0	0.640535	8.94282e-13	1	0	-0.0357708	0.875244	0	0	-0.138077	0.292939	0
KDM1A	ENSG00000004487	protein_coding	1	0	0.465795	2.57649e-06	1	0	0.719905	8.3189e-07	1	0	0.544938	1.28865e-05	1
RBM6	ENSG00000004534	protein_coding	0	0	0.198234	0.312056	0	0	0.0959912	0.816015	0	0	0.332641	0.142288	0
CAMKK1	ENSG00000004660	protein_coding	0	0	0.711414	0.00395252	1	0	0.871448	0.0217461	1	0	0.410116	0.200593	0
RECQL	ENSG00000004700	protein_coding	1	0	1.12952	3.72561e-12	1	0	1.37966	2.55992e-08	1	0	1.61848	8.16662e-14	1
VPS50	ENSG00000004766	protein_coding	0	0	0.24901	0.389502	0	0	1.21528	0.00110783	1	0	0.860048	0.00689405	1
HSPB6	ENSG00000004776	protein_coding	0	0	-2.42927	NA	0	0	-3.02165	NA	0	0	-2.82066	NA	0
ARHGAP33	ENSG00000004777	protein_coding	0	0	-0.315016	0.697365	0	0	-1.29408	0.0588177	0	0	-1.48635	0.00287166	0
NDUFAB1	ENSG00000004779	protein_coding	0	0	0.658124	0.0258527	1	0	0.592328	0.210274	0	0	0.731757	0.0439986	1
PDK4	ENSG00000004799	protein_coding	0	0	0.644927	0.418173	0	0	0.663314	0.588575	0	0	1.67241	0.120897	0
SLC22A16	ENSG00000004809	protein_coding	0	0	NA	NA	0	0	NA	NA	0	0	NA	NA	0
ZMYND10	ENSG00000004838	protein_coding	0	0	0.90428	NA	0	0	1.25556	NA	0	0	0.470531	NA	0
ABCB5	ENSG00000004846	protein_coding	0	0	0.742077	0.616225	0	0	0.235419	0.918282	0	0	0.821231	0.672398	0
ARX	ENSG00000004848	protein_coding	0	0	2.59723	NA	0	0	-0.146764	NA	0	0	-1.62264	NA	0
SLC25A13	ENSG00000004864	protein_coding	0	0	0.440485	0.00449328	1	0	0.476013	0.0513722	0	0	0.557981	0.00403877	1
ST7	ENSG00000004866	protein_coding	0	0	-0.100423	0.895224	0	0	-0.352849	0.720475	0	0	-0.822024	0.112156	0
CDC27	ENSG00000004897	protein_coding	0	0	0.11093	0.496856	0	0	0.361212	0.161083	0	0	0.561405	0.000349111	1
SLC4A1	ENSG00000004939	protein_coding	0	0	NA	NA	0	0	NA	NA	0	0	NA	NA	0
CALCR	ENSG00000004948	protein_coding	0	0	0.604634	NA	0	0	0.380163	NA	0	0	-0.48692	NA	0
HCCS	ENSG00000004961	protein_coding	0	0	0.56393	0.163411	0	0	0.426797	0.535149	0	0	0.675372	0.174567	0
DVL2	ENSG00000004975	protein_coding	0	0	-0.313794	0.166678	0	0	0.153091	0.75883	0	0	-0.0681222	0.847163	0
PRSS22	ENSG00000005001	protein_coding	0	0	NA	NA	0	0	NA	NA	0	0	NA	NA	0
UPF1	ENSG00000005007	protein_coding	0	0	0.602915	5.90912e-05	1	0	0.389087	0.101544	0	0	0.940298	8.89605e-07	1
SKAP2	ENSG00000005020	protein_coding	0	0	0.598342	NA	0	0	-2.62476	NA	0	0	-0.493993	NA	0
SLC25A5	ENSG00000005022	protein_coding	0	0	-0.250401	0.0213998	0	0	-0.192265	0.317184	0	0	-0.223625	0.138907	0
MCUB	ENSG00000005059	protein_coding	0	0	0.818084	0.117033	0	0	0.410295	0.648034	0	0	1.14945	0.0889983	0
HOXA11	ENSG00000005073	protein_coding	0	0	0.904306	0.0815347	0	0	1.72783	0.0190242	1	0	1.06923	0.0890175	0
POLR2J	ENSG00000005075	protein_coding	0	0	-0.125027	0.80548	0	0	-1.09341	0.00468454	0	1	-0.878447	0.0103827	0
DHX33	ENSG00000005100	protein_coding	0	0	0.193159	0.451677	0	0	0.721309	0.0244639	1	0	0.603188	0.0308981	1
MEOX1	ENSG00000005102	protein_coding	0	0	3.06827	0.082645	0	0	1.58508	0.480249	0	0	-0.139136	0.933411	0
THSD7A	ENSG00000005108	protein_coding	0	0	-1.42749	NA	0	0	-0.852193	NA	0	0	-0.965272	0.770918	0
LIG3	ENSG00000005156	protein_coding	0	0	-0.228164	0.294628	0	0	0.0877997	0.856505	0	0	0.0513686	0.877235	0
RPAP3	ENSG00000005175	protein_coding	0	0	0.339644	0.113978	0	0	0.731685	0.0152589	1	0	1.30887	4.94177e-07	1
ACSM3	ENSG00000005187	protein_coding	0	0	-0.983865	0.399798	0	0	-0.225493	0.927899	0	0	0.826704	0.734321	0
AC004381.6	ENSG00000005189	protein_coding	0	0	0.651845	0.245399	0	0	0.0608818	0.954252	0	0	-0.263486	0.676097	0
CIAPIN1	ENSG00000005194	protein_coding	0	0	-0.104064	0.7342	0	0	-0.0368418	0.94731	0	0	-0.196432	0.754398	0
SPPL2B	ENSG00000005206	protein_coding	0	0	-0.782157	0.136732	0	0	-1.05109	0.136961	0	0	-1.26254	0.0110954	0
FAM214B	ENSG00000005238	protein_coding	0	0	0.209172	0.535167	0	0	0.0497466	0.935473	0	0	-0.211423	0.540815	0
COPZ2	ENSG00000005243	protein_coding	0	0	-0.314877	0.670634	0	0	-0.0631727	0.962691	0	0	0.158933	0.8764	0
PRKAR2B	ENSG00000005249	protein_coding	1	0	1.11419	9.57031e-07	1	0	1.06328	0.00166409	1	0	1.4274	2.52436e-06	1
MSL3	ENSG00000005302	protein_coding	0	0	0.0278008	0.949663	0	0	-0.025892	0.967237	0	0	0.467811	0.20178	0
CREBBP	ENSG00000005339	protein_coding	0	0	0.0626667	0.767492	0	0	-0.129785	0.651977	0	0	0.489777	0.00571189	1
TSPOAP1	ENSG00000005379	protein_coding	0	0	0.480952	0.685614	0	0	0.0100435	0.995366	0	0	1.36157	0.389944	0
MPO	ENSG00000005381	protein_coding	0	0	NA	NA	0	0	NA	NA	0	0	NA	NA	0
PON1	ENSG00000005421	protein_coding	0	0	-0.507415	NA	0	0	-0.247093	NA	0	0	-0.515825	NA	0
GCFC2	ENSG00000005436	protein_coding	0	0	-0.0569611	0.887247	0	0	0.569008	0.252327	0	0	0.296377	0.45726	0
WDR54	ENSG00000005448	protein_coding	0	0	-0.271435	0.391405	0	0	0.0835163	0.900837	0	0	-0.339576	0.33868	0
CROT	ENSG00000005469	protein_coding	0	0	0.402153	0.520254	0	0	-0.293526	0.757386	0	0	-0.0726051	0.922099	0
ABCB4	ENSG00000005471	protein_coding	0	0	0.0816867	0.913134	0	0	0.0390887	0.972866	0	0	0.307264	0.692336	0
KMT2E	ENSG00000005483	protein_coding	0	0	-0.0999096	0.61842	0	0	-0.25718	0.390962	0	0	-0.087794	0.703374	0
RHBDD2	ENSG00000005486	protein_coding	0	1	-0.777699	1.88725e-05	0	1	-0.66547	0.0297875	0	1	-1.61768	1.54804e-21	0
SOX8	ENSG00000005513	protein_coding	0	0	0.966966	0.583513	0	0	-0.186079	0.942749	0	0	1.45751	0.562779	0
IBTK	ENSG00000005700	protein_coding	0	0	0.896332	0.311399	0	0	2.53004	0.0731467	0	0	1.17471	0.313447	0
ZNF195	ENSG00000005801	protein_coding	0	0	-0.527308	0.0918454	0	0	-0.417379	0.453879	0	0	-0.129859	0.801055	0
MYCBP2	ENSG00000005810	protein_coding	0	0	-0.0970245	0.645034	0	0	0.546418	0.0340453	1	0	0.693959	0.000759741	1
FBXL3	ENSG00000005812	protein_coding	0	0	0.447907	0.069636	0	0	1.2628	0.000362708	1	0	1.37291	1.25443e-05	1
ITGAL	ENSG00000005844	protein_coding	0	0	NA	NA	0	0	NA	NA	0	0	-5.07497	NA	0
PDK2	ENSG00000005882	protein_coding	0	0	-0.119027	0.825202	0	0	-0.495343	0.414155	0	0	-0.450117	0.336365	0
ITGA3	ENSG00000005884	protein_coding	0	0	0.107407	0.340989	0	0	0.433788	0.00233135	1	0	0.391329	0.000476837	1
ZFX	ENSG00000005889	protein_coding	0	0	0.384758	0.0546376	0	0	1.15796	0.00013304	1	0	1.05882	1.81233e-05	1
LAMP2	ENSG00000005893	protein_coding	0	0	0.0171525	0.932506	0	0	0.630866	0.000534534	1	0	0.432877	0.00882707	1
ITGA2B	ENSG00000005961	protein_coding	0	0	0.377397	NA	0	0	-0.697004	0.774672	0	0	-2.25057	0.0298537	0
ASB4	ENSG00000005981	protein_coding	0	0	NA	NA	0	0	NA	NA	0	0	NA	NA	0
GDE1	ENSG00000006007	protein_coding	0	0	0.360482	0.0773655	0	0	0.816696	0.00487063	1	0	0.599707	0.0131726	1
C19orf60	ENSG00000006015	protein_coding	0	0	-0.450467	0.315805	0	0	0.0878558	0.927899	0	0	-0.568905	0.218895	0
CRLF1	ENSG00000006016	protein_coding	0	0	0.156109	0.87485	0	0	-0.826571	0.362113	0	0	-0.180042	0.857855	0
OSBPL7	ENSG00000006025	protein_coding	0	0	-0.284889	0.752255	0	0	-0.501079	0.685449	0	0	-1.27814	0.0396753	0
TMEM98	ENSG00000006042	protein_coding	0	0	0.363042	0.111949	0	0	0.494632	0.154028	0	0	0.196056	0.743737	0
YBX2	ENSG00000006047	protein_coding	0	0	0.0591953	0.949273	0	0	-0.494659	0.604961	0	0	-0.233083	0.774504	0
KRT33A	ENSG00000006059	protein_coding	0	0	-2.29695	NA	0	0	NA	NA	0	0	NA	NA	0
MAP3K14	ENSG00000006062	protein_coding	0	0	0.751069	0.00354034	1	0	0.285027	0.540501	0	0	0.19405	0.583832	0
ABCC8	ENSG00000006071	protein_coding	0	0	0.154948	NA	0	0	-2.00247	NA	0	0	-0.838808	NA	0
CACNG3	ENSG00000006116	protein_coding	0	0	NA	NA	0	0	NA	NA	0	0	NA	NA	0
TMEM132A	ENSG00000006118	protein_coding	0	0	-0.281226	0.115253	0	0	-0.569096	0.0213441	0	1	-0.771068	9.50226e-06	0
AP2B1	ENSG00000006125	protein_coding	0	0	0.0115588	0.946973	0	0	0.419344	0.00319887	1	0	0.172763	0.179645	0
TAC1	ENSG00000006128	protein_coding	0	0	-3.28518	NA	0	0	-3.51116	NA	0	0	NA	NA	0
ZNF263	ENSG00000006194	protein_coding	0	0	0.28828	0.281025	0	0	0.449086	0.272691	0	0	0.768901	0.0109669	1
CX3CL1	ENSG00000006210	protein_coding	0	0	1.47894	0.00424136	1	0	0.578261	0.523686	0	0	-0.158026	0.803267	0
SPATA20	ENSG00000006282	protein_coding	0	0	0.0561579	0.82967	0	0	0.219215	0.529002	0	0	0.322369	0.17887	0
CACNA1G	ENSG00000006283	protein_coding	0	0	0.373018	0.676283	0	0	-1.19143	0.0961067	0	0	-1.38528	0.00927361	0
TNFRSF12A	ENSG00000006327	protein_coding	0	0	-0.47696	8.82568e-05	0	1	0.0384841	0.919463	0	0	0.0328062	0.88078	0
DLX6	ENSG00000006377	protein_coding	0	0	NA	NA	0	0	NA	NA	0	0	NA	NA	0
MAP3K9	ENSG00000006432	protein_coding	0	0	0.0804923	0.772518	0	0	-0.17228	0.64791	0	0	-0.328942	0.153674	0
RALA	ENSG00000006451	protein_coding	0	0	-0.147729	0.529382	0	0	0.2747	0.463957	0	0	0.343332	0.217483	0
BAIAP2L1	ENSG00000006453	protein_coding	0	0	0.489614	0.00823791	1	0	0.252394	0.465085	0	0	0.265536	0.288612	0
KDM7A	ENSG00000006459	protein_coding	0	0	-2.25355	2.92477e-25	0	1	-0.0584347	0.952745	0	0	-0.225985	0.707907	0
ETV1	ENSG00000006468	protein_coding	0	0	0.821067	0.159926	0	0	0.683081	0.465266	0	0	1.3007	0.0971108	0
AGK	ENSG00000006530	protein_coding	0	0	-0.420661	0.513962	0	0	-0.6457	0.460592	0	0	0.0471048	0.960564	0
ALDH3B1	ENSG00000006534	protein_coding	0	0	-0.132841	0.62151	0	0	-0.19064	0.654133	0	0	-0.142255	0.643134	0
TTC22	ENSG00000006555	protein_coding	0	0	NA	NA	0	0	NA	NA	0	0	NA	NA	0
PHTF2	ENSG00000006576	protein_coding	0	0	0.249461	0.122603	0	0	0.603733	0.00545068	1	0	0.601934	0.000722932	1
CCL26	ENSG00000006606	protein_coding	0	0	-0.447464	0.759059	0	0	-2.05463	0.0397841	0	1	-1.38442	0.25885	0
FARP2	ENSG00000006607	protein_coding	0	0	0.837174	9.90143e-06	1	0	0.447444	0.162056	0	0	0.240632	0.36079	0
USH1C	ENSG00000006611	protein_coding	0	0	0.655655	0.7893	0	0	-0.781342	0.549617	0	0	-0.511933	0.659478	0
GGCT	ENSG00000006625	protein_coding	0	0	0.185758	0.700741	0	0	0.0685074	0.937337	0	0	1.29146	0.0125733	1
DBF4	ENSG00000006634	protein_coding	1	0	0.471935	0.000888343	1	0	0.769828	0.000234075	1	0	0.943324	1.338e-07	1
TBXA2R	ENSG00000006638	protein_coding	0	0	1.89281	NA	0	0	-1.39974	0.304134	0	0	-1.18519	0.34262	0
IFRD1	ENSG00000006652	protein_coding	0	1	-1.00115	0.000433935	0	1	-0.596053	0.0298162	0	1	-0.310927	0.21757	0
LGALS14	ENSG00000006659	protein_coding	0	0	NA	NA	0	0	NA	NA	0	0	NA	NA	0
COX10	ENSG00000006695	protein_coding	0	0	-0.502359	0.259949	0	0	-0.392634	0.593494	0	0	-0.76501	0.0716226	0
GTF2IRD1	ENSG00000006704	protein_coding	0	0	-0.364989	0.103518	0	0	-0.0433335	0.938086	0	0	-0.118357	0.732882	0
PAF1	ENSG00000006712	protein_coding	0	0	0.0404478	0.87636	0	0	0.21146	0.494902	0	0	0.764098	0.000147836	1
VPS41	ENSG00000006715	protein_coding	0	0	0.0275311	0.915478	0	0	0.805239	0.00123315	1	0	0.614602	0.00431505	1
ARHGAP44	ENSG00000006740	protein_coding	0	0	-0.0460915	0.953857	0	0	0.0352001	0.975153	0	0	-0.601296	0.245908	0
ELAC2	ENSG00000006744	protein_coding	0	0	0.644598	0.000154624	1	0	0.461088	0.10268	0	0	0.606441	0.005387	1
SCIN	ENSG00000006747	protein_coding	0	0	1.03713	0.35906	0	0	-0.779031	0.524269	0	0	-0.214385	0.867761	0
ARSD	ENSG00000006756	protein_coding	0	0	4.18236	NA	0	0	-0.0432247	0.989059	0	0	0.0882241	0.976295	0
PNPLA4	ENSG00000006757	protein_coding	0	0	-1.44393	0.0287539	0	1	-0.648725	0.698426	0	0	-0.420629	0.760099	0
MYH13	ENSG00000006788	protein_coding	0	0	-0.513272	0.338052	0	0	-0.976739	0.126675	0	0	-1.81389	2.76988e-07	0
ADIPOR2	ENSG00000006831	protein_coding	1	0	0.424066	0.000236862	1	0	0.631398	0.000814384	1	0	0.56467	0.000100592	1
CDKL3	ENSG00000006837	protein_coding	0	0	-1.43009	NA	0	0	-0.441259	NA	0	0	-1.3961	0.616122	0
UPP2	ENSG00000007001	protein_coding	0	0	-0.833151	NA	0	0	-1.03278	NA	0	0	-2.02209	NA	0
PRSS21	ENSG00000007038	protein_coding	0	0	NA	NA	0	0	NA	NA	0	0	NA	NA	0
MARK4	ENSG00000007047	protein_coding	0	0	-0.167771	0.610911	0	0	0.173877	0.758629	0	0	0.171443	0.682148	0
PROM1	ENSG00000007062	protein_coding	0	0	0.604634	NA	0	0	0.380163	NA	0	0	-0.48692	NA	0
CCDC124	ENSG00000007080	protein_coding	0	0	-0.144041	0.665273	0	0	-0.794666	0.00910162	0	1	0.171164	0.674365	0
CEACAM21	ENSG00000007129	protein_coding	0	0	NA	NA	0	0	NA	NA	0	0	NA	NA	0
PAFAH1B1	ENSG00000007168	protein_coding	1	0	0.432317	0.00170013	1	0	1.06832	9.63833e-08	1	0	0.885908	2.80229e-07	1
NOS2	ENSG00000007171	protein_coding	0	0	1.26607	0.30823	0	0	-0.410484	0.79593	0	0	-0.235044	0.856458	0
DNAH9	ENSG00000007174	protein_coding	0	0	2.92094	NA	0	0	-0.411097	NA	0	0	-1.99416	0.414455	0
KIAA0100	ENSG00000007202	protein_coding	0	0	0.260887	0.0177971	0	0	0.318236	0.059969	0	0	0.418931	0.00147657	1
SLC13A2	ENSG00000007216	protein_coding	0	0	NA	NA	0	0	NA	NA	0	0	NA	NA	0
GAS7	ENSG00000007237	protein_coding	0	0	0.420486	0.34842	0	0	0.0514826	0.952745	0	0	-0.313668	0.515857	0
TRAPPC6A	ENSG00000007255	protein_coding	0	0	-0.970156	0.393407	0	0	-1.32132	0.365563	0	0	-1.11227	0.399198	0
MATK	ENSG00000007264	protein_coding	0	0	0.480415	NA	0	0	3.69971	NA	0	0	-0.881839	0.719648	0
CEACAM7	ENSG00000007306	protein_coding	0	0	NA	NA	0	0	NA	NA	0	0	NA	NA	0
CD79B	ENSG00000007312	protein_coding	0	0	-0.849832	NA	0	0	0.380163	NA	0	0	-0.48692	NA	0
SCN4A	ENSG00000007314	protein_coding	0	0	-1.58831	NA	0	0	0.463675	NA	0	0	-1.35437	NA	0
ST7L	ENSG00000007341	protein_coding	0	0	-0.650065	0.0956873	0	0	-0.733545	0.193756	0	0	-0.55458	0.240423	0
TKTL1	ENSG00000007350	protein_coding	0	0	0.166803	NA	0	0	0.882177	NA	0	0	1.50469	NA	0
PAX6	ENSG00000007372	protein_coding	0	0	-1.32366	NA	0	0	-2.30256	0.291061	0	0	-2.16961	0.328173	0
RPUSD1	ENSG00000007376	protein_coding	0	0	0.142692	0.735372	0	0	-0.0367332	0.958081	0	0	-0.44153	0.205613	0
RHBDF1	ENSG00000007384	protein_coding	0	0	-0.542276	0.148495	0	0	-0.871014	0.100242	0	0	-1.16904	0.000350435	0
LUC7L	ENSG00000007392	protein_coding	0	0	0.478343	0.109683	0	0	-0.0114612	0.984456	0	0	-0.0058427	0.988957	0
CACNA2D2	ENSG00000007402	protein_coding	0	0	1.04817	0.21569	0	0	-0.693284	0.492836	0	0	0.543851	0.632798	0
BAIAP3	ENSG00000007516	protein_coding	0	0	-0.353913	0.689242	0	0	-0.473909	0.718124	0	0	-1.23465	0.0517658	0
TSR3	ENSG00000007520	protein_coding	0	0	0.0871596	0.829896	0	0	0.400715	0.479699	0	0	0.279039	0.487013	0
PIGQ	ENSG00000007541	protein_coding	0	0	-0.0985488	0.880317	0	0	-0.185568	0.843982	0	0	-0.984468	0.0136236	0
CRAMP1	ENSG00000007545	protein_coding	0	0	0.106129	0.871173	0	0	-0.21664	0.807011	0	0	1.1012	0.0949705	0
TEAD3	ENSG00000007866	protein_coding	0	0	0.037126	0.908696	0	0	0.01068	0.982783	0	0	-0.171121	0.535162	0
SELE	ENSG00000007908	protein_coding	0	0	0.598342	NA	0	0	0.375627	NA	0	0	-0.493993	NA	0
DNAJC11	ENSG00000007923	protein_coding	0	0	-0.0457144	0.91775	0	0	0.185255	0.771104	0	0	0.493735	0.210402	0
FMO3	ENSG00000007933	protein_coding	0	0	2.14981	NA	0	0	1.89436	NA	0	0	1.09185	NA	0
MYLIP	ENSG00000007944	protein_coding	0	0	0.432879	0.163563	0	0	0.423019	0.40575	0	0	0.486278	0.194705	0
NOX1	ENSG00000007952	protein_coding	0	0	1.60583	NA	0	0	-0.0330448	NA	0	0	0.514414	NA	0
E2F2	ENSG00000007968	protein_coding	0	0	NA	NA	0	0	NA	NA	0	0	NA	NA	0
PSMB1	ENSG00000008018	protein_coding	0	0	-0.00113281	0.996856	0	0	0.179356	0.545484	0	0	0.126994	0.577363	0
SYN1	ENSG00000008056	protein_coding	0	0	-0.449847	0.731791	0	0	-1.51025	0.20356	0	0	-1.5181	0.139364	0
JARID2	ENSG00000008083	protein_coding	0	0	0.559301	0.0063537	1	0	0.455428	0.205933	0	0	0.754443	0.0033492	1
CDKL5	ENSG00000008086	protein_coding	0	0	-0.769397	0.175941	0	0	-0.282451	0.813203	0	0	-0.578014	0.417839	0
CAMK1G	ENSG00000008118	protein_coding	0	0	-0.617015	NA	0	0	-2.03099	0.30907	0	0	-2.45188	0.103628	0
CDK11A	ENSG00000008128	protein_coding	0	0	-1.10809	NA	0	0	-1.11968	NA	0	0	0.317094	NA	0
NADK	ENSG00000008130	protein_coding	0	0	0.221616	0.477988	0	0	0.558689	0.208798	0	0	0.325309	0.355296	0
TFAP2B	ENSG00000008196	protein_coding	0	0	NA	NA	0	0	NA	NA	0	0	NA	NA	0
TFAP2D	ENSG00000008197	protein_coding	0	0	NA	NA	0	0	NA	NA	0	0	NA	NA	0
DLEC1	ENSG00000008226	protein_coding	0	0	-1.16642	NA	0	0	-3.66314	0.0405139	0	1	-2.4938	0.310764	0
CYTH3	ENSG00000008256	protein_coding	1	0	0.534745	3.94507e-05	1	0	0.95984	1.63379e-07	1	0	1.18061	3.43997e-13	1
ADAM22	ENSG00000008277	protein_coding	0	0	0.0937112	0.889908	0	0	-0.258808	0.770181	0	0	-0.430128	0.430135	0
SYPL1	ENSG00000008282	protein_coding	1	0	1.11904	1.14898e-14	1	0	1.13225	1.04588e-07	1	0	0.914945	2.95847e-07	1
CYB561	ENSG00000008283	protein_coding	0	0	0.94634	9.62271e-07	1	0	0.0741027	0.865084	0	0	-0.2947	0.191547	0
SPAG9	ENSG00000008294	protein_coding	0	0	0.126989	0.432398	0	0	0.816459	1.19047e-05	1	0	0.909157	4.42618e-08	1
CELSR3	ENSG00000008300	protein_coding	0	0	-0.639619	0.00608936	0	1	-0.686834	0.0648988	0	0	-0.703808	0.0131097	0
AASS	ENSG00000008311	protein_coding	0	0	-0.23187	0.647421	0	0	0.142492	0.879367	0	0	0.492196	0.407747	0
PLEKHG6	ENSG00000008323	protein_coding	0	0	-0.713384	0.696962	0	0	-2.52597	0.028802	0	1	-3.45449	3.18739e-06	0
SS18L2	ENSG00000008324	protein_coding	0	0	0.172029	0.818942	0	0	-0.149631	0.893073	0	0	-0.143537	0.856988	0
MPND	ENSG00000008382	protein_coding	0	0	-0.879153	0.273658	0	0	-0.610101	0.681811	0	0	-0.0424885	0.977053	0
MGST1	ENSG00000008394	protein_coding	0	0	0.514148	0.475064	0	0	0.176562	0.888218	0	0	0.797331	0.36564	0
CRY1	ENSG00000008405	protein_coding	0	0	0.334341	0.0906496	0	0	1.07884	0.000186139	1	0	0.900975	0.000147207	1
PGLYRP1	ENSG00000008438	protein_coding	0	0	NA	NA	0	0	NA	NA	0	0	NA	NA	0
NFIX	ENSG00000008441	protein_coding	0	0	0.291425	0.196589	0	0	0.383857	0.255143	0	0	0.258249	0.339636	0
ST3GAL1	ENSG00000008513	protein_coding	0	0	0.152529	0.434524	0	0	0.120279	0.723737	0	0	-0.00838111	0.975409	0
MMP25	ENSG00000008516	protein_coding	0	0	-0.246728	NA	0	0	-2.25398	NA	0	0	-0.42719	NA	0
IL32	ENSG00000008517	protein_coding	0	0	0.0609779	0.905464	0	0	-0.00564006	0.993894	0	0	0.0403852	0.938515	0
PKD1	ENSG00000008710	protein_coding	0	1	-1.82076	5.37731e-46	0	1	-1.14987	1.5667e-06	0	1	-1.24738	4.49979e-12	0
MAPK8IP2	ENSG00000008735	protein_coding	0	0	-0.643972	NA	0	0	-1.24623	0.62628	0	0	-1.23938	0.604409	0
MED24	ENSG00000008838	protein_coding	0	0	0.365124	0.16271	0	0	0.013982	0.980996	0	0	-0.206994	0.499403	0
RHOBTB2	ENSG00000008853	protein_coding	0	0	0.514788	0.21416	0	0	0.190226	0.805047	0	0	0.355695	0.509011	0
HEATR5B	ENSG00000008869	protein_coding	0	0	-0.287381	0.19934	0	0	0.199922	0.658233	0	0	0.0956296	0.778927	0
SEC62	ENSG00000008952	protein_coding	0	0	0.241923	0.189558	0	0	0.962912	3.20405e-05	1	0	1.30427	2.73742e-10	1
RPS20	ENSG00000008988	protein_coding	0	0	0.0312585	0.84398	0	0	-0.409917	0.00308696	0	1	0.0997368	0.539615	0
CSDE1	ENSG00000009307	protein_coding	0	0	0.274642	0.000151532	0	0	0.872804	2.09522e-17	1	0	0.930846	1.11466e-30	1
UBE3C	ENSG00000009335	protein_coding	1	0	0.522861	0.00194442	1	0	1.02499	5.29084e-05	1	0	0.986234	6.6821e-06	1
REV3L	ENSG00000009413	protein_coding	0	0	-0.422128	0.0186191	0	1	-0.0664966	0.888826	0	0	0.133235	0.665633	0
TENM1	ENSG00000009694	protein_coding	0	0	-1.30621	0.466844	0	0	-0.0664434	NA	0	0	-1.73008	0.362585	0
PAX7	ENSG00000009709	protein_coding	0	0	0.560984	0.216376	0	0	0.192832	0.821828	0	0	0.318941	0.575629	0
MASP2	ENSG00000009724	protein_coding	0	0	-0.656935	NA	0	0	-1.94733	0.315274	0	0	-1.24335	0.608897	0
IYD	ENSG00000009765	protein_coding	0	0	-0.833151	NA	0	0	-2.15232	NA	0	0	-0.48692	NA	0
FAM76A	ENSG00000009780	protein_coding	0	0	0.317989	0.572909	0	0	0.639545	0.474722	0	0	0.118458	0.86774	0
TRAF3IP3	ENSG00000009790	protein_coding	0	0	0.147148	NA	0	0	-0.125246	NA	0	0	-2.82978	NA	0
POMT2	ENSG00000009830	protein_coding	0	0	-0.0741415	0.825202	0	0	-0.124203	0.803192	0	0	-0.412501	0.119704	0
VTA1	ENSG00000009844	protein_coding	1	0	0.49199	0.00364136	1	0	0.651967	0.0160359	1	0	0.915302	1.90289e-05	1
MLXIPL	ENSG00000009950	protein_coding	0	0	0.604634	NA	0	0	-3.47841	NA	0	0	-3.62491	NA	0
BAZ1B	ENSG00000009954	protein_coding	0	0	0.294389	0.00103559	0	0	1.04339	2.60279e-18	1	0	1.34577	5.86794e-32	1
RANBP9	ENSG00000010017	protein_coding	0	0	-0.311037	0.134676	0	0	0.157549	0.743096	0	0	0.202105	0.519442	0
ETV7	ENSG00000010030	protein_coding	0	0	-0.423827	NA	0	0	1.95631	NA	0	0	-2.13596	0.17936	0
SPRTN	ENSG00000010072	protein_coding	0	0	0.484475	0.0826036	0	0	0.733079	0.0665324	0	0	0.986862	0.00248781	1
METTL13	ENSG00000010165	protein_coding	0	0	0.4604	0.0708608	0	0	0.145036	0.779068	0	0	0.235432	0.487783	0
DYRK4	ENSG00000010219	protein_coding	0	0	-0.609324	0.269587	0	0	-1.01132	0.120786	0	0	-0.947678	0.0735491	0
ZNF207	ENSG00000010244	protein_coding	0	0	0.07942	0.708022	0	0	-0.419652	0.0359573	0	1	-0.570748	5.91584e-05	0
UQCRC1	ENSG00000010256	protein_coding	0	0	0.138957	0.364239	0	0	0.104303	0.712085	0	0	0.321056	0.425904	0
STARD3NL	ENSG00000010270	protein_coding	0	0	0.302554	0.561783	0	0	0.514326	0.133494	0	0	0.522758	0.0482628	1
CD9	ENSG00000010278	protein_coding	1	0	0.480402	8.51557e-06	1	0	0.541415	0.000980895	1	0	0.41525	0.00289492	1
HHATL	ENSG00000010282	protein_coding	0	0	NA	NA	0	0	NA	NA	0	0	NA	NA	0
NCAPD2	ENSG00000010292	protein_coding	1	0	0.566742	2.6997e-12	1	0	0.508537	8.0749e-06	1	0	0.654578	1.31038e-10	1
IFFO1	ENSG00000010295	protein_coding	0	0	-0.851755	NA	0	0	-1.73697	0.437816	0	0	-3.02165	0.00791804	0
GIPR	ENSG00000010310	protein_coding	0	0	-0.106451	NA	0	0	-1.45365	0.474297	0	0	-0.989651	0.672839	0
PHF7	ENSG00000010318	protein_coding	0	0	-0.841741	0.0716801	0	0	-0.347079	0.752854	0	0	-0.572376	0.382631	0
SEMA3G	ENSG00000010319	protein_coding	0	0	0.643826	0.367745	0	0	-0.011322	0.992675	0	0	0.0634705	0.944875	0
NISCH	ENSG00000010322	protein_coding	0	1	-0.502965	0.0020537	0	1	-0.515527	0.043971	0	1	-0.656381	0.000917596	0
STAB1	ENSG00000010327	protein_coding	0	0	0.74134	NA	0	0	-1.52948	NA	0	0	-1.35876	NA	0
FUZ	ENSG00000010361	protein_coding	0	0	-1.19917	0.0277075	0	1	-0.354729	0.79372	0	0	-0.196091	0.859014	0
SLC6A13	ENSG00000010379	protein_coding	0	0	-0.35992	NA	0	0	-1.69719	0.455864	0	0	-2.94951	0.0161758	0
IDS	ENSG00000010404	protein_coding	0	0	-0.0456673	0.883677	0	0	0.101704	0.830517	0	0	-0.314847	0.201533	0
PRSS3	ENSG00000010438	protein_coding	0	0	NA	NA	0	0	NA	NA	0	0	NA	NA	0
ZNF200	ENSG00000010539	protein_coding	0	0	0.45845	0.177342	0	0	0.490913	0.380569	0	0	0.0648753	0.893748	0
CD4	ENSG00000010610	protein_coding	0	0	2.31837	NA	0	0	-1.96199	0.301375	0	0	-2.89544	0.0124159	0
LRRC23	ENSG00000010626	protein_coding	0	0	0.322084	0.644903	0	0	0.00668063	0.995366	0	0	0.0562439	0.945191	0
BTK	ENSG00000010671	protein_coding	0	0	0.598342	NA	0	0	-1.13756	NA	0	0	-1.89933	NA	0
HFE	ENSG00000010704	protein_coding	0	0	3.921	NA	0	0	-1.45365	0.474297	0	0	-2.11456	0.129101	0
SCMH1	ENSG00000010803	protein_coding	0	0	-0.725669	0.000356122	0	1	-0.598953	0.0812613	0	0	-0.945859	2.10217e-05	0
FYN	ENSG00000010810	protein_coding	0	0	-0.94854	0.000119364	0	1	0.113128	0.884345	0	0	0.243301	0.633143	0
HIVEP2	ENSG00000010818	protein_coding	0	0	-0.189932	0.475166	0	0	0.812412	0.0225092	1	0	1.24157	3.99348e-05	1
FMO1	ENSG00000010932	protein_coding	0	0	NA	NA	0	0	NA	NA	0	0	NA	NA	0
TCEB3	ENSG00000011007	protein_coding	1	0	0.729853	2.70344e-07	1	0	0.804552	0.000243309	1	0	1.27568	3.81138e-11	1
LYPLA2	ENSG00000011009	protein_coding	0	0	0.213881	0.542311	0	0	-0.514934	0.193518	0	0	-0.961311	3.04975e-05	0
CLCN6	ENSG00000011021	protein_coding	0	0	-0.556529	0.199629	0	0	-1.31814	0.00174464	0	1	-1.44532	6.15859e-06	0
MRC2	ENSG00000011028	protein_coding	0	1	-0.883053	1.49985e-18	0	1	-0.659975	0.000120748	0	1	-0.610493	3.43137e-06	0
NME1-NME2	ENSG00000011052	protein_coding	0	0	NA	NA	0	0	NA	NA	0	0	NA	NA	0
SLC6A7	ENSG00000011083	protein_coding	0	0	NA	NA	0	0	NA	NA	0	0	-5.50273	NA	0
TSPAN9	ENSG00000011105	protein_coding	0	0	0.422816	0.0700239	0	0	0.452438	0.230341	0	0	-0.00172903	0.995378	0
BTBD7	ENSG00000011114	protein_coding	0	0	2.08392	0.101827	0	0	5.62423	0.0162974	1	0	0.328633	0.826153	0
APBA3	ENSG00000011132	protein_coding	0	0	-0.522879	0.357776	0	0	-0.386114	0.714272	0	0	0.42213	0.635539	0
MKS1	ENSG00000011143	protein_coding	0	0	-0.381974	0.283336	0	0	0.4215	0.533518	0	0	0.413943	0.424746	0
ABHD5	ENSG00000011198	protein_coding	0	0	-0.0648276	0.900922	0	0	0.108056	0.895344	0	0	0.236589	0.651148	0
ANOS1	ENSG00000011201	protein_coding	0	0	-0.550862	0.0102249	0	1	-0.107336	0.844804	0	0	0.0639065	0.874252	0
AKAP8L	ENSG00000011243	protein_coding	0	0	0.355423	0.408558	0	0	0.0208083	0.980122	0	0	0.371259	0.454761	0
MBTD1	ENSG00000011258	protein_coding	0	0	0.108715	0.789331	0	0	0.224563	0.705367	0	0	0.048704	0.91508	0
UTP18	ENSG00000011260	protein_coding	1	0	0.861026	1.63199e-08	1	0	1.08476	1.69821e-06	1	0	1.15868	7.921e-09	1
RNF216	ENSG00000011275	protein_coding	0	0	0.237917	0.0619443	0	0	0.585368	0.000841914	1	0	0.911088	7.21077e-10	1
TTC19	ENSG00000011295	protein_coding	0	0	0.156915	0.680751	0	0	0.0189427	0.978787	0	0	0.0727804	0.874768	0
PTBP1	ENSG00000011304	protein_coding	0	0	0.393143	3.02869e-05	1	0	-0.0483941	0.827096	0	0	-0.478162	2.59129e-06	0
DPF1	ENSG00000011332	protein_coding	0	0	0.122404	0.885351	0	0	0.589802	0.595828	0	0	0.447606	0.608208	0
SYT7	ENSG00000011347	protein_coding	0	0	0.895579	0.156221	0	0	-0.028317	0.981941	0	0	0.240445	0.77489	0
LARS2	ENSG00000011376	protein_coding	0	0	1.0213	2.44413e-05	1	0	0.659114	0.0779313	0	0	0.690262	0.0217288	1
PIK3C2A	ENSG00000011405	protein_coding	0	0	-0.257789	0.0390446	0	0	0.112592	0.720782	0	0	0.182433	0.30917	0
PLAUR	ENSG00000011422	protein_coding	0	0	0.437856	0.0994171	0	0	-0.305699	0.455864	0	0	-0.223046	0.465836	0
ANLN	ENSG00000011426	protein_coding	1	0	0.645863	1.48637e-15	1	0	0.605761	4.1476e-06	1	0	0.767777	3.98062e-15	1
WIZ	ENSG00000011451	protein_coding	0	0	0.0536148	0.891314	0	0	-0.284056	0.525216	0	0	-0.515627	0.0546472	0
RABGAP1	ENSG00000011454	protein_coding	0	0	0.0827208	0.749007	0	0	0.625902	0.0356612	1	0	0.786318	0.00087009	1
DCN	ENSG00000011465	protein_coding	0	0	0.162114	NA	0	0	1.37693	NA	0	0	0.508056	NA	0
QPCTL	ENSG00000011478	protein_coding	0	0	-0.187309	0.660776	0	0	0.033287	0.96792	0	0	-0.947772	0.00139073	0
PPP5C	ENSG00000011485	protein_coding	0	0	0.220616	0.229996	0	0	0.225847	0.460592	0	0	0.141958	0.556516	0
CEP68	ENSG00000011523	protein_coding	0	0	-0.0428598	0.910953	0	0	-0.232364	0.620093	0	0	0.126511	0.743247	0
MAP4K3	ENSG00000011566	protein_coding	1	0	0.422634	0.0101357	1	0	1.01152	4.63956e-05	1	0	1.23453	5.86149e-09	1
ZBTB32	ENSG00000011590	protein_coding	0	0	-3.26133	0.0397953	0	1	-2.32824	NA	0	0	-3.00294	0.193315	0
TYROBP	ENSG00000011600	protein_coding	0	0	NA	NA	0	0	NA	NA	0	0	NA	NA	0
TMEM159	ENSG00000011638	protein_coding	0	0	-0.294015	0.55942	0	0	0.860643	0.331744	0	0	0.102523	0.881658	0
GABRA3	ENSG00000011677	protein_coding	0	0	-0.814588	0.0115138	0	1	0.0972513	0.917877	0	0	-0.33012	0.52318	0
BRCA1	ENSG00000012048	protein_coding	0	0	0.0477616	0.825882	0	0	0.760067	0.000459168	1	0	1.41107	8.87765e-13	1
ERCC1	ENSG00000012061	protein_coding	0	0	-0.11451	0.727997	0	0	-0.379787	0.340589	0	0	-0.593722	0.0162933	0
CD22	ENSG00000012124	protein_coding	0	0	0.425657	NA	0	0	0.955136	NA	0	0	0.648529	0.844547	0
SEMA3B	ENSG00000012171	protein_coding	0	0	0.059402	0.92391	0	0	-0.61357	0.252783	0	0	-0.588705	0.148792	0
MBTPS2	ENSG00000012174	protein_coding	0	0	0.110703	0.839586	0	0	0.537579	0.424546	0	0	-0.389405	0.358756	0
PRICKLE3	ENSG00000012211	protein_coding	0	0	0.100589	0.872945	0	0	-0.141445	0.874917	0	0	0.0261847	0.969754	0
LTF	ENSG00000012223	protein_coding	0	0	-0.832242	NA	0	0	0.0108991	NA	0	0	-0.940159	NA	0
EXTL3	ENSG00000012232	protein_coding	0	0	0.745132	1.27256e-09	1	0	0.275426	0.208243	0	0	0.255537	0.129733	0
NR1H4	ENSG00000012504	protein_coding	0	0	0.598342	NA	0	0	0.375627	NA	0	0	-0.493993	NA	0
ELOVL5	ENSG00000012660	protein_coding	0	0	0.0997406	0.549294	0	0	0.123942	0.643415	0	0	-0.0130496	0.953516	0
ALOX5	ENSG00000012779	protein_coding	0	0	0.478405	NA	0	0	1.27995	NA	0	0	-1.23209	NA	0
KDM5D	ENSG00000012817	protein_coding	0	0	NA	NA	0	0	NA	NA	0	0	NA	NA	0
CALCOCO1	ENSG00000012822	protein_coding	0	0	-0.376696	0.183312	0	0	0.275855	0.645217	0	0	0.168693	0.694819	0
UBR7	ENSG00000012963	protein_coding	0	0	1.03358	NA	0	0	1.45712	NA	0	0	-0.148341	0.963065	0
MAP4K5	ENSG00000012983	protein_coding	0	0	-0.45086	0.00798528	0	1	0.11908	0.801453	0	0	0.323197	0.231848	0
EHD3	ENSG00000013016	protein_coding	0	0	0.109907	0.776877	0	0	0.718221	0.124773	0	0	0.666937	0.0728305	0
PSMC4	ENSG00000013275	protein_coding	0	0	-1.17175	0.0677227	0	0	-2.06995	0.0167676	0	1	-0.170214	0.907719	0
MAN2B2	ENSG00000013288	protein_coding	0	0	-0.254002	0.494906	0	0	-0.207568	0.728635	0	0	-0.250074	0.536541	0
SLC7A14	ENSG00000013293	protein_coding	0	0	NA	NA	0	0	NA	NA	0	0	-4.38142	NA	0
CLDN11	ENSG00000013297	protein_coding	0	0	-3.28518	NA	0	0	-3.41412	NA	0	0	-5.76544	0.0594955	0
SLC25A39	ENSG00000013306	protein_coding	0	0	-0.221564	0.150685	0	0	-0.40543	0.0713871	0	0	-0.584021	8.99053e-05	0
MVP	ENSG00000013364	protein_coding	1	0	0.658569	4.00098e-07	1	0	0.743628	0.000257916	1	0	0.855644	3.8592e-07	1
NUB1	ENSG00000013374	protein_coding	0	0	-0.44947	0.170583	0	0	0.205009	0.784392	0	0	0.341865	0.494152	0
PGM3	ENSG00000013375	protein_coding	0	0	0.789229	0.000574378	1	0	0.782761	0.0328313	1	0	0.497579	0.0831906	0
RWDD2A	ENSG00000013392	protein_coding	0	0	-0.0102284	0.992903	0	0	0.398972	0.796752	0	0	0.434832	0.707168	0
CLK1	ENSG00000013441	protein_coding	0	0	-0.543125	0.0075229	0	1	-0.641232	0.0524682	0	0	-0.464787	0.0720588	0
POLR3B	ENSG00000013503	protein_coding	1	0	0.784366	0.000740082	1	0	1.18805	0.000802412	1	0	1.63336	7.7014e-07	1
ANGEL1	ENSG00000013523	protein_coding	0	0	0.148187	0.750895	0	0	0.504298	0.419679	0	0	-0.380092	0.32271	0
RNF14	ENSG00000013561	protein_coding	0	0	0.257302	0.465082	0	0	0.464006	0.371322	0	0	0.980742	0.0103265	1
DNASE1L1	ENSG00000013563	protein_coding	0	0	-0.512184	0.41918	0	0	0.422023	0.746094	0	0	0.278038	0.781853	0
DDX11	ENSG00000013573	protein_coding	0	0	0.00400714	0.990501	0	0	-0.438431	0.14955	0	0	-0.243409	0.358619	0
HEBP1	ENSG00000013583	protein_coding	0	0	-0.39185	0.224892	0	0	-0.384846	0.467656	0	0	0.0542478	0.916736	0
GPRC5A	ENSG00000013588	protein_coding	0	0	0.737175	7.381e-08	1	0	-0.297796	0.164255	0	0	-1.10552	3.96766e-20	0
MAMLD1	ENSG00000013619	protein_coding	0	0	1.15881	0.0261903	1	0	-0.230969	0.797114	0	0	-0.0262113	0.971715	0
CD6	ENSG00000013725	protein_coding	0	0	-0.856141	NA	0	0	-1.03707	NA	0	0	-2.02904	NA	0
TACC3	ENSG00000013810	protein_coding	0	0	0.568786	6.39459e-06	1	0	-0.0445899	0.882609	0	0	0.340151	0.0418275	1
UFL1	ENSG00000014123	protein_coding	0	0	0.369211	0.14441	0	0	0.843851	0.0201664	1	0	1.02159	0.000475288	1
POLA2	ENSG00000014138	protein_coding	0	0	0.0472672	0.884571	0	0	-0.0789639	0.871629	0	0	-0.289131	0.264015	0
ZC3H3	ENSG00000014164	protein_coding	0	0	-0.467595	0.196083	0	0	-0.668622	0.182088	0	0	-0.797574	0.024155	0
CAPN1	ENSG00000014216	protein_coding	0	0	0.244102	0.217112	0	0	-0.13729	0.720782	0	0	-0.1582	0.503092	0
ACPP	ENSG00000014257	protein_coding	0	0	NA	NA	0	0	NA	NA	0	0	NA	NA	0
MDH1	ENSG00000014641	protein_coding	0	0	0.41748	0.00345577	1	0	0.230919	0.348646	0	0	0.237615	0.193634	0
SLC30A9	ENSG00000014824	protein_coding	0	0	-0.323808	0.0241881	0	1	0.447809	0.0749924	0	0	0.532253	0.00649841	1
MTMR11	ENSG00000014914	protein_coding	0	0	0.00363459	0.995254	0	0	-0.142959	0.8461	0	0	-0.565856	0.120999	0
COX15	ENSG00000014919	protein_coding	0	0	0.451592	0.0411718	1	0	0.841539	0.0107093	1	0	0.531827	0.0527273	0
CCDC88C	ENSG00000015133	protein_coding	0	0	0.40569	0.830589	0	0	-0.109793	0.966614	0	0	-0.246669	0.905999	0
YAF2	ENSG00000015153	protein_coding	0	0	-0.40116	0.190784	0	0	-0.0807709	0.908924	0	0	-0.100895	0.837902	0
ZMYND11	ENSG00000015171	protein_coding	0	0	0.304855	0.227814	0	0	1.60998	5.7516e-06	1	0	1.42959	5.87874e-06	1
WAS	ENSG00000015285	protein_coding	0	0	-3.30014	NA	0	0	NA	NA	0	0	-4.49154	NA	0
DPEP1	ENSG00000015413	protein_coding	0	0	1.60016	NA	0	0	-1.06768	NA	0	0	0.508056	NA	0
BID	ENSG00000015475	protein_coding	0	0	0.36153	0.58976	0	0	-0.135375	0.899984	0	0	0.450284	0.554638	0
MATR3.2	ENSG00000015479	protein_coding	0	0	-1.42716	0.0675106	0	0	-2.16446	0.012228	0	1	-3.00795	5.65339e-08	0
NPC1L1	ENSG00000015520	protein_coding	0	0	NA	NA	0	0	NA	NA	0	0	NA	NA	0
XYLT2	ENSG00000015532	protein_coding	0	0	0.709929	0.0057902	1	0	0.00105162	0.998859	0	0	0.132924	0.721206	0
RGPD5	ENSG00000015568	protein_coding	0	0	0.541643	0.43	0	0	1.15287	0.258894	0	0	0.416426	0.644699	0
STMN4	ENSG00000015592	protein_coding	0	0	NA	NA	0	0	-3.41412	NA	0	0	-3.47269	NA	0
NUDCD3	ENSG00000015676	protein_coding	0	0	-0.0209907	0.932552	0	0	0.622234	0.00680156	1	0	0.167553	0.441787	0
ISL1	ENSG00000016082	protein_coding	0	0	2.18316	NA	0	0	1.96051	NA	0	0	-0.317191	NA	0
CHDH	ENSG00000016391	protein_coding	0	0	0.715264	0.446149	0	0	1.04581	0.453892	0	0	0.860804	0.468691	0
IL20RA	ENSG00000016402	protein_coding	0	0	2.15401	NA	0	0	1.95737	NA	0	0	0.0652996	NA	0
CLCA1	ENSG00000016490	protein_coding	0	0	NA	NA	0	0	NA	NA	0	0	-3.47269	NA	0
CLCA4	ENSG00000016602	protein_coding	0	0	NA	NA	0	0	NA	NA	0	0	-3.47269	NA	0
GLT8D1	ENSG00000016864	protein_coding	0	0	-0.229363	0.466435	0	0	0.284283	0.607063	0	0	-0.116044	0.779993	0
ATP2C1	ENSG00000017260	protein_coding	1	0	0.301558	0.0323912	1	0	0.793884	4.19403e-05	1	0	0.870297	1.44161e-07	1
IGF1	ENSG00000017427	protein_coding	0	0	-1.8244	NA	0	0	-4.06729	NA	0	0	-4.70004	0.0772727	0
SLC38A5	ENSG00000017483	protein_coding	0	0	-1.69407	NA	0	0	-1.41981	NA	0	0	-0.618688	NA	0
RALBP1	ENSG00000017797	protein_coding	1	0	0.441635	2.90011e-06	1	0	0.902536	4.01807e-11	1	0	1.05416	3.72569e-05	1
RUFY3	ENSG00000018189	protein_coding	0	0	-0.290841	0.227377	0	0	-0.322333	0.404346	0	0	-0.155837	0.633963	0
CNTN1	ENSG00000018236	protein_coding	0	0	0.311777	0.774646	0	0	0.419885	0.811402	0	0	0.631351	0.643508	0
SLC11A1	ENSG00000018280	protein_coding	0	0	0.168881	NA	0	0	-0.979201	NA	0	0	-0.351709	NA	0
WWTR1	ENSG00000018408	protein_coding	0	0	0.623533	0.0135034	1	0	0.711575	0.0717283	0	0	0.716319	0.0258868	1
AGPS	ENSG00000018510	protein_coding	0	0	0.034329	0.83036	0	0	0.618816	6.36004e-05	1	0	0.709238	2.28753e-07	1
ZNF806	ENSG00000018607	unprocessed_pseudogene	0	0	0.604634	NA	0	0	0.380163	NA	0	0	-0.48692	NA	0
CXorf56	ENSG00000018610	protein_coding	0	0	0.579803	0.0658882	0	0	0.834477	0.07856	0	0	0.463309	0.24182	0
ATP1A2	ENSG00000018625	protein_coding	0	0	-0.339065	0.847535	0	0	0.0194048	0.994052	0	0	-0.123314	0.958228	0
TTC27	ENSG00000018699	protein_coding	0	0	-0.0340035	0.927376	0	0	0.531936	0.195999	0	0	0.639312	0.0433363	1
ZNF582	ENSG00000018869	protein_coding	0	0	-0.997276	0.189967	0	0	-0.376324	0.827075	0	0	-0.189194	0.904196	0
VSIG2	ENSG00000019102	protein_coding	0	0	0.487629	NA	0	0	-2.18351	0.350846	0	0	-2.03834	0.443538	0
PHLDB1	ENSG00000019144	protein_coding	0	0	-0.0886653	0.634249	0	0	0.0116002	0.973593	0	0	-0.110045	0.574206	0
MARCO	ENSG00000019169	protein_coding	0	0	-0.045361	0.978758	0	0	0.615876	0.791585	0	0	-0.216212	0.89964	0
CYP24A1	ENSG00000019186	protein_coding	0	0	2.12663	3.00968e-16	1	0	0.71635	0.0399822	1	0	0.436834	0.128843	0
PRDM11	ENSG00000019485	protein_coding	0	0	0.208095	0.638825	0	0	0.0694048	0.927899	0	0	-0.230275	0.602887	0
SYT13	ENSG00000019505	protein_coding	0	0	-0.412584	NA	0	0	0.961891	NA	0	0	1.51137	NA	0
SNAI2	ENSG00000019549	protein_coding	0	0	1.22385	0.0106312	1	0	0.522914	0.515563	0	0	1.15828	0.0677026	0
CD74	ENSG00000019582	protein_coding	0	0	-2.16038	NA	0	0	-2.55004	0.268021	0	0	-3.23859	0.0503561	0
HGF	ENSG00000019991	protein_coding	0	0	NA	NA	0	0	NA	NA	0	0	NA	NA	0
ZRANB1	ENSG00000019995	protein_coding	0	0	0.116454	0.736735	0	0	1.19203	0.00250919	1	0	1.34315	0.000107606	1
NCDN	ENSG00000020129	protein_coding	0	0	0.0894863	0.792371	0	0	0.374084	0.409159	0	0	0.130389	0.72325	0
ADGRA2	ENSG00000020181	protein_coding	0	0	-0.475631	0.212987	0	0	-0.979658	0.0329711	0	1	-0.972977	0.0042744	0
CCT8L1P	ENSG00000020219	processed_pseudogene	0	0	NA	NA	0	0	-2.58625	NA	0	0	-4.49154	NA	0
ZFP64	ENSG00000020256	protein_coding	0	0	0.489197	0.0202181	1	0	0.156437	0.713074	0	0	0.484182	0.063635	0
MNAT1	ENSG00000020426	protein_coding	0	0	0.121606	0.744464	0	0	0.309234	0.562068	0	0	0.754825	0.0390575	1
SAMD4A	ENSG00000020577	protein_coding	0	0	-0.29489	0.023946	0	0	-0.189053	0.444864	0	0	0.0284927	0.90418	0
RUNX3	ENSG00000020633	protein_coding	0	0	0.537525	0.347234	0	0	0.357974	0.716055	0	0	0.144148	0.848088	0
MRE11	ENSG00000020922	protein_coding	1	0	0.567114	0.00540638	1	0	0.702707	0.0261159	1	0	0.523861	0.0426355	1
PLEKHB1	ENSG00000021300	protein_coding	0	0	-0.636064	0.486388	0	0	-0.881206	0.48332	0	0	-0.270335	0.837902	0
SERPINB1	ENSG00000021355	protein_coding	0	0	0.00258523	0.996129	0	0	0.419038	0.465516	0	0	0.19466	0.666716	0
CYP3A43	ENSG00000021461	protein_coding	0	0	NA	NA	0	0	NA	NA	0	0	NA	NA	0
SLC7A9	ENSG00000021488	protein_coding	0	0	-3.85522	NA	0	0	-4.85136	NA	0	0	-4.49154	NA	0
SPAST	ENSG00000021574	protein_coding	1	0	0.411376	0.0112004	1	0	1.39937	1.87337e-08	1	0	1.31594	8.47129e-10	1
NRXN3	ENSG00000021645	protein_coding	0	0	0.197764	0.700741	0	0	-0.266523	0.708819	0	0	-0.53424	0.190128	0
OSBPL5	ENSG00000021762	protein_coding	0	0	0.106983	0.739455	0	0	-0.0844265	0.884345	0	0	0.110876	0.760739	0
AQR	ENSG00000021776	protein_coding	0	0	0.192348	0.327934	0	0	0.269382	0.391511	0	0	0.313796	0.158364	0
CPS1	ENSG00000021826	protein_coding	0	0	0.432283	0.0622696	0	0	1.24354	0.000234075	1	0	0.983004	0.000482254	1
C8B	ENSG00000021852	protein_coding	0	0	NA	NA	0	0	NA	NA	0	0	NA	NA	0
FHL1	ENSG00000022267	protein_coding	1	0	0.445603	0.000512031	1	0	0.934962	5.51799e-07	1	0	0.472427	0.00394901	1
RTFDC1	ENSG00000022277	protein_coding	0	0	-0.0631456	0.772962	0	0	0.308722	0.247842	0	0	0.293513	0.172053	0
GABRA1	ENSG00000022355	protein_coding	0	0	-0.431363	NA	0	0	2.37694	NA	0	0	-0.836345	NA	0
NLRP2	ENSG00000022556	protein_coding	0	0	NA	NA	0	0	NA	NA	0	0	NA	NA	0
SLC45A4	ENSG00000022567	protein_coding	0	0	0.605662	0.297947	0	0	0.599121	0.515062	0	0	0.344542	0.639289	0
RNF10	ENSG00000022840	protein_coding	0	0	-0.0675597	0.72842	0	0	0.0181903	0.957169	0	0	0.308292	0.0906188	0
ZNF839	ENSG00000022976	protein_coding	0	0	-1.05696	0.295849	0	0	-0.611808	0.729689	0	0	-0.846861	0.503449	0
ZDHHC6	ENSG00000023041	protein_coding	0	0	-0.0224585	0.95901	0	0	0.219435	0.703057	0	0	-0.148165	0.689601	0
GRAMD1B	ENSG00000023171	protein_coding	0	0	0.287312	0.742495	0	0	-0.119042	0.932347	0	0	-0.426415	0.627493	0
RNH1	ENSG00000023191	protein_coding	0	0	-0.136046	0.926317	0	0	-0.537034	0.734686	0	0	-0.603751	0.616616	0
NDUFS1	ENSG00000023228	protein_coding	0	0	0.383313	0.431077	0	0	0.386206	0.672277	0	0	0.42294	0.461161	0
RB1CC1	ENSG00000023287	protein_coding	0	0	-0.305908	0.00319035	0	1	1.06129	4.84334e-10	1	0	1.33618	9.22457e-20	1
ERP44	ENSG00000023318	protein_coding	0	0	0.357254	0.0927172	0	0	0.330472	0.354361	0	0	0.304971	0.254782	0
ALAS1	ENSG00000023330	protein_coding	0	0	0.275702	0.196494	0	0	0.318913	0.364644	0	0	0.245073	0.351197	0
BIRC3	ENSG00000023445	protein_coding	0	0	-0.387818	0.312329	0	0	1.31395	0.0382069	1	0	1.49424	0.264638	0
AKAP11	ENSG00000023516	protein_coding	0	0	-0.0800591	0.710486	0	0	0.841264	0.000465791	1	0	0.879628	2.05805e-05	1
GLRX2	ENSG00000023572	protein_coding	0	0	-0.986996	0.380699	0	0	0.619305	0.821954	0	0	0.750104	0.764825	0
SNAPC1	ENSG00000023608	protein_coding	0	0	-0.181191	0.423	0	0	0.725661	0.0305657	1	0	1.0215	8.67689e-05	1
DERA	ENSG00000023697	protein_coding	0	0	-0.118183	0.732016	0	0	0.0430908	0.946033	0	0	0.206903	0.602077	0
STRAP	ENSG00000023734	protein_coding	1	0	0.443261	3.07023e-05	1	0	0.542949	0.000700063	1	0	0.68667	6.39483e-07	1
ABCC2	ENSG00000023839	protein_coding	0	0	-1.75706	0.182081	0	0	-1.88776	0.289441	0	0	-2.67946	0.0187207	0
DEF6	ENSG00000023892	protein_coding	0	0	-0.286283	0.790079	0	0	0.0308227	0.986842	0	0	2.49197	0.171051	0
PLEKHO1	ENSG00000023902	protein_coding	0	0	0.702396	0.00463452	1	0	-0.160435	0.73896	0	0	-0.0426276	0.91003	0
GCLM	ENSG00000023909	protein_coding	0	0	1.01266	2.82114e-06	1	0	0.618803	0.067129	0	0	0.90278	0.000825373	1
UBR2	ENSG00000024048	protein_coding	0	0	0.102178	0.651252	0	0	0.691635	0.0204111	1	0	0.932084	1.62084e-05	1
EHD2	ENSG00000024422	protein_coding	0	0	0.022256	0.962812	0	0	-0.255521	0.595885	0	0	-0.941223	2.7655e-05	0
DEPDC1	ENSG00000024526	protein_coding	1	0	0.511113	0.00234235	1	0	0.985961	1.87535e-05	1	0	1.25233	2.27815e-09	1
CCDC28A	ENSG00000024862	protein_coding	0	0	-0.387267	0.384139	0	0	0.426915	0.615164	0	0	0.506814	0.430304	0
RRAGD	ENSG00000025039	protein_coding	0	0	0.58622	0.234434	0	0	0.824613	0.262732	0	0	0.790855	0.185165	0
HSF2	ENSG00000025156	protein_coding	0	0	-0.124334	0.718458	0	0	0.512945	0.321987	0	0	0.548422	0.136423	0
PHF20	ENSG00000025293	protein_coding	1	0	0.592279	0.00119856	1	0	1.2904	4.72487e-06	1	0	1.18028	8.58201e-07	1
HSD17B6	ENSG00000025423	protein_coding	0	0	-0.838655	NA	0	0	-0.564776	NA	0	0	-0.490668	0.882558	0
NR1H3	ENSG00000025434	protein_coding	0	0	0.051192	0.957777	0	0	-0.186746	0.893496	0	0	0.295826	0.758704	0
TYMP	ENSG00000025708	protein_coding	0	0	-0.426342	NA	0	0	-1.0462	0.712772	0	0	-1.49026	0.488482	0
NCAPH2	ENSG00000025770	protein_coding	0	0	0.0964817	0.653757	0	0	0.140421	0.70549	0	0	0.341016	0.100967	0
TOMM34	ENSG00000025772	protein_coding	0	0	0.582806	0.000111228	1	0	0.467924	0.0549108	0	0	0.170206	0.459382	0
SEC63	ENSG00000025796	protein_coding	0	0	-0.410919	0.0102104	0	1	0.322933	0.334594	0	0	0.242816	0.33958	0
KPNA6	ENSG00000025800	protein_coding	1	0	0.357228	0.0133199	1	0	0.518919	0.0153314	1	0	0.373059	0.0337624	1
VIM	ENSG00000026025	protein_coding	0	0	-0.0701503	0.546682	0	0	-0.392801	0.00283403	0	1	0.125759	0.330062	0
RTEL1-TNFRSF6B	ENSG00000026036	protein_coding	0	0	-1.84539	NA	0	0	-3.20328	0.132093	0	0	-3.7104	0.02982	0
FAS	ENSG00000026103	protein_coding	0	0	0.14402	0.811839	0	0	1.29663	0.0689891	0	0	1.26293	0.0358889	1
RNASET2	ENSG00000026297	protein_coding	0	0	0.313857	0.7333	0	0	-0.49622	0.653135	0	0	-0.198207	0.838829	0
CD44	ENSG00000026508	protein_coding	0	0	0.239802	0.180324	0	0	0.234866	0.4358	0	0	0.178987	0.428844	0
KCNG1	ENSG00000026559	protein_coding	0	0	-1.2929	1.44306e-09	0	1	-0.214743	0.73896	0	0	-0.589716	0.0743204	0
AGPAT4	ENSG00000026652	protein_coding	0	0	-0.354245	0.383772	0	0	-0.840823	0.069342	0	0	-0.469767	0.27932	0
SLAMF7	ENSG00000026751	protein_coding	0	0	-0.284342	0.843465	0	0	0.403108	0.862488	0	0	-0.110467	0.950648	0
BTN3A1	ENSG00000026950	protein_coding	0	0	0.479888	0.631891	0	0	0.252831	0.873807	0	0	0.673169	0.571107	0
MIPEP	ENSG00000027001	protein_coding	0	0	0.294184	0.594614	0	0	0.852843	0.230669	0	0	0.264916	0.65843	0
PRKCH	ENSG00000027075	protein_coding	0	0	0.886237	0.00515793	1	0	0.76768	0.121091	0	0	0.751029	0.0577073	0
INSRR	ENSG00000027644	protein_coding	0	0	2.18316	NA	0	0	-1.89264	NA	0	0	-0.42719	NA	0
IFNGR1	ENSG00000027697	protein_coding	1	0	0.449791	0.0441217	1	0	0.996615	0.00236108	1	0	0.954314	0.000606569	1
B4GALT7	ENSG00000027847	protein_coding	0	0	-0.0297864	0.960545	0	0	-0.0150194	0.9852	0	0	-0.326858	0.474471	0
SH2D2A	ENSG00000027869	protein_coding	0	0	-1.8244	NA	0	0	-2.73925	NA	0	0	-2.02209	NA	0
VRK2	ENSG00000028116	protein_coding	0	0	-0.235991	0.258186	0	0	0.352743	0.324061	0	0	0.5004	0.0644588	0
TNFRSF1B	ENSG00000028137	protein_coding	0	0	4.84899	NA	0	0	1.18203	0.660916	0	0	0.350553	0.883987	0
VEZT	ENSG00000028203	protein_coding	0	0	0.0880594	0.783661	0	0	0.66487	0.0816274	0	0	0.553705	0.0632308	0
POU2F2	ENSG00000028277	protein_coding	0	0	-0.391228	0.763339	0	0	-0.680825	0.687045	0	0	-1.13654	0.283263	0
BRD9	ENSG00000028310	protein_coding	0	0	0.402742	0.120961	0	0	-0.119303	0.814376	0	0	-0.0899356	0.800305	0
SNX1	ENSG00000028528	protein_coding	0	0	0.0976441	0.593666	0	0	0.380623	0.0887904	0	0	0.329328	0.0577679	0
TBPL1	ENSG00000028839	protein_coding	0	0	0.721605	0.00729146	1	0	0.397245	0.386939	0	0	0.665335	0.0474176	1
ARNTL2	ENSG00000029153	protein_coding	0	0	0.314892	0.177365	0	0	0.775606	0.018054	1	0	0.770364	0.00522333	1
BCLAF1	ENSG00000029363	protein_coding	0	0	-0.05513	0.727427	0	0	0.500418	0.00205318	1	0	0.730602	4.08476e-08	1
SLC39A9	ENSG00000029364	protein_coding	0	0	0.283049	0.0270347	0	0	0.516069	0.00936426	1	0	0.187107	0.274725	0
ANK1	ENSG00000029534	protein_coding	0	0	-0.776237	0.496315	0	0	-0.153374	0.950617	0	0	-0.476528	0.774632	0
IBSP	ENSG00000029559	protein_coding	0	0	NA	NA	0	0	NA	NA	0	0	NA	NA	0
TFB1M	ENSG00000029639	protein_coding	0	0	0.536133	0.374859	0	0	0.250568	0.814115	0	0	0.95047	0.199295	0
RABEP1	ENSG00000029725	protein_coding	1	0	0.431325	0.0337027	1	0	0.734844	0.0349241	1	0	1.00282	7.83074e-05	1
HMGB3	ENSG00000029993	protein_coding	1	0	1.04357	1.99072e-14	1	0	0.913737	6.99509e-06	1	0	1.16012	6.24127e-11	1
NUP160	ENSG00000030066	protein_coding	1	0	0.772538	1.06263e-12	1	0	0.737288	8.19906e-06	1	0	1.10134	2.46138e-14	1
BAK1	ENSG00000030110	protein_coding	0	0	0.620112	0.0759207	0	0	0.319026	0.614423	0	0	0.327183	0.467526	0
MUSK	ENSG00000030304	protein_coding	0	0	0.604634	NA	0	0	0.380163	NA	0	0	-2.02209	NA	0
IKZF2	ENSG00000030419	protein_coding	0	0	-0.699394	0.0215034	0	1	0.13426	0.874744	0	0	0.28218	0.613099	0
GRN	ENSG00000030582	protein_coding	0	0	-0.284352	0.103042	0	0	-0.237852	0.46724	0	0	-0.235536	0.281802	0
FAM13B	ENSG00000031003	protein_coding	0	0	-0.708322	0.000453652	0	1	0.0375953	0.953864	0	0	0.360855	0.303929	0
ARHGAP31	ENSG00000031081	protein_coding	0	0	0.451368	0.0301282	1	0	0.23387	0.546955	0	0	0.813866	0.00139067	1
CENPQ	ENSG00000031691	protein_coding	1	0	0.94637	0.000813366	1	0	1.06273	0.0116126	1	0	1.54734	3.40669e-05	1
SARS	ENSG00000031698	protein_coding	0	0	-1.61727	2.54715e-83	0	1	0.274208	0.200126	0	0	0.456481	0.00168896	1
RANBP3	ENSG00000031823	protein_coding	0	0	0.0706658	0.841776	0	0	0.0610324	0.917322	0	0	0.167374	0.666478	0
ARID4A	ENSG00000032219	protein_coding	0	0	0.0631209	0.841776	0	0	0.575243	0.102446	0	0	1.23731	1.41174e-05	1
TSSC1	ENSG00000032389	protein_coding	0	0	-0.201329	0.752978	0	0	-0.335111	0.698426	0	0	-0.252852	0.705972	0
PNPLA6	ENSG00000032444	protein_coding	0	0	-0.0284822	0.939265	0	0	-0.224005	0.616459	0	0	-0.602652	0.00845273	0
IFT88	ENSG00000032742	protein_coding	0	0	-0.197869	0.69843	0	0	0.29048	0.73311	0	0	0.770824	0.194477	0
ALG1	ENSG00000033011	protein_coding	0	0	0.436797	0.367745	0	0	0.545504	0.463903	0	0	0.349079	0.565727	0
ZCCHC8	ENSG00000033030	protein_coding	0	0	0.0102488	0.977775	0	0	0.116817	0.825191	0	0	0.155916	0.632566	0
ABCF2	ENSG00000033050	protein_coding	0	0	-0.297046	0.503945	0	0	0.517965	0.176604	0	0	0.0709026	0.851337	0
CHPF2	ENSG00000033100	protein_coding	0	0	0.682442	0.194127	0	0	0.617123	0.461802	0	0	-0.00510237	0.993756	0
LRRC7	ENSG00000033122	protein_coding	0	0	-0.637204	0.604352	0	0	-1.4955	0.206471	0	0	-1.24118	0.26869	0
FUT8	ENSG00000033170	protein_coding	0	0	0.0961988	0.679718	0	0	0.726318	0.00587269	1	0	0.735839	0.000673396	1
UBA6	ENSG00000033178	protein_coding	0	0	0.154738	0.274318	0	0	0.749059	5.10118e-05	1	0	0.860158	6.19309e-09	1
GAB2	ENSG00000033327	protein_coding	0	0	-0.449677	0.313677	0	0	-0.645972	0.287891	0	0	-0.446196	0.381321	0
ATP6V0A1	ENSG00000033627	protein_coding	0	0	-1.73327	0.0839711	0	0	-1.42919	0.40575	0	0	-2.0746	0.0713622	0
PIAS1	ENSG00000033800	protein_coding	0	0	0.330952	0.061539	0	0	0.0927053	0.81006	0	0	0.22392	0.3325	0
SLC4A7	ENSG00000033867	protein_coding	0	0	0.11845	0.58097	0	0	1.04506	2.76467e-05	1	0	0.615155	0.00320973	1
APBA2	ENSG00000034053	protein_coding	0	0	0.310259	0.781463	0	0	0.557423	0.729564	0	0	1.05986	0.437152	0
MAP2K3	ENSG00000034152	protein_coding	0	0	0.485678	0.0243805	1	0	-0.250774	0.479009	0	0	-0.138066	0.646917	0
EFCAB1	ENSG00000034239	protein_coding	0	0	-3.28518	NA	0	0	NA	NA	0	0	-3.47269	NA	0
TMSB10	ENSG00000034510	protein_coding	0	0	-0.0283538	0.941177	0	0	-0.812499	1.36647e-10	0	1	-0.403227	0.104121	0
ASTE1	ENSG00000034533	protein_coding	0	0	-0.438107	0.428204	0	0	0.133471	0.910508	0	0	0.0438186	0.958938	0
RNF19A	ENSG00000034677	protein_coding	0	0	0.147453	0.465683	0	0	0.913835	0.000196434	1	0	0.873331	2.30517e-05	1
PEX3	ENSG00000034693	protein_coding	0	0	0.238664	0.660295	0	0	0.325166	0.696617	0	0	0.611685	0.287923	0
GABARAPL2	ENSG00000034713	protein_coding	0	0	0.256502	0.292561	0	0	0.386083	0.289658	0	0	0.544943	0.0427899	1
MYOC	ENSG00000034971	protein_coding	0	0	NA	NA	0	0	NA	NA	0	0	NA	NA	0
SH3YL1	ENSG00000035115	protein_coding	0	0	-1.24667	0.0906496	0	0	-0.91615	0.497225	0	0	-1.21864	0.18867	0
FAM136A	ENSG00000035141	protein_coding	0	0	0.186071	0.3372	0	0	0.413627	0.154688	0	0	0.452968	0.0310082	1
VCL	ENSG00000035403	protein_coding	1	0	0.484515	1.72965e-06	1	0	0.488742	0.00100094	1	0	0.627569	3.26409e-07	1
DEPDC1B	ENSG00000035499	protein_coding	1	0	1.83447	4.91345e-25	1	0	1.5685	1.55707e-09	1	0	1.6465	3.33885e-13	1
DAPK2	ENSG00000035664	protein_coding	0	0	0.123311	0.925362	0	0	-0.950104	0.386836	0	0	-0.489813	0.654961	0
NSMAF	ENSG00000035681	protein_coding	0	0	-0.0456703	0.881795	0	0	0.231841	0.565978	0	0	0.226084	0.438978	0
ADSS	ENSG00000035687	protein_coding	0	0	0.158108	0.601159	0	0	0.619024	0.109118	0	0	0.691159	0.0200094	1
STAP1	ENSG00000035720	protein_coding	0	0	-1.82993	NA	0	0	-4.52025	0.110014	0	0	-2.02904	NA	0
TIMP2	ENSG00000035862	protein_coding	0	0	0.553722	2.1711e-06	1	0	0.337224	0.0900851	0	0	0.510306	0.000312461	1
RFC1	ENSG00000035928	protein_coding	0	0	0.160241	0.144518	0	0	1.13872	9.31299e-15	1	0	1.55407	2.78091e-30	1
TBC1D23	ENSG00000036054	protein_coding	0	0	0.0958481	0.727023	0	0	0.595584	0.0676977	0	0	0.269075	0.331126	0
CUL3	ENSG00000036257	protein_coding	1	0	0.592275	7.29976e-06	1	0	0.538347	0.0138453	1	0	0.745352	1.21068e-05	1
MYOM2	ENSG00000036448	protein_coding	0	0	2.18316	NA	0	0	0.544593	NA	0	0	-0.42719	NA	0
OTC	ENSG00000036473	protein_coding	0	0	NA	NA	0	0	NA	NA	0	0	NA	NA	0
CYP46A1	ENSG00000036530	protein_coding	0	0	NA	NA	0	0	-2.58625	NA	0	0	-5.00223	NA	0
ZZZ3	ENSG00000036549	protein_coding	0	0	0.252784	0.0677857	0	0	1.15172	2.32014e-09	1	0	1.06267	1.19053e-10	1
SLC18A1	ENSG00000036565	protein_coding	0	0	NA	NA	0	0	NA	NA	0	0	NA	NA	0
USP2	ENSG00000036672	protein_coding	0	0	-0.143254	0.926822	0	0	-0.510026	0.787903	0	0	1.1618	0.576326	0
CASR.1	ENSG00000036828	protein_coding	0	0	NA	NA	0	0	NA	NA	0	0	-5.07497	NA	0
TUBG2	ENSG00000037042	protein_coding	0	0	0.154446	0.924792	0	0	-0.665237	0.680854	0	0	0.176449	0.919342	0
RPL26L1	ENSG00000037241	protein_coding	0	0	-0.375724	0.352205	0	0	-0.221331	0.786049	0	0	-0.267813	0.595505	0
FLT4	ENSG00000037280	protein_coding	0	0	0.5927	0.243356	0	0	-0.252499	0.777815	0	0	-0.365105	0.488004	0
NSUN2	ENSG00000037474	protein_coding	1	0	0.512275	5.04331e-05	1	0	0.789205	2.97148e-06	1	0	1.01677	7.2022e-12	1
FBXO42	ENSG00000037637	protein_coding	0	0	-0.0320629	0.939912	0	0	0.325956	0.529559	0	0	0.293945	0.460986	0
MFAP3	ENSG00000037749	protein_coding	1	0	0.546754	0.0120866	1	0	1.11684	0.000561848	1	0	1.08821	9.19805e-05	1
MRI1	ENSG00000037757	protein_coding	0	0	0.1099	0.875549	0	0	0.313586	0.75326	0	0	-0.395916	0.494123	0
METTL1	ENSG00000037897	protein_coding	0	0	-0.747214	0.21631	0	0	-1.19712	0.116203	0	0	-0.792512	0.273423	0
HOXC8	ENSG00000037965	protein_coding	0	0	0.467873	0.469852	0	0	0.0502883	0.965353	0	0	0.364296	0.63979	0
AGA	ENSG00000038002	protein_coding	0	0	-0.336626	0.497541	0	0	0.164117	0.865955	0	0	0.577507	0.372167	0
PI4K2B	ENSG00000038210	protein_coding	0	0	0.263699	0.680786	0	0	1.9896	0.0189677	1	0	1.43447	0.0543958	0
BOD1L1	ENSG00000038219	protein_coding	0	0	-0.299707	0.109683	0	0	0.454462	0.162855	0	0	0.670848	0.00517021	1
MAT2B	ENSG00000038274	protein_coding	1	0	0.567464	3.5238e-05	1	0	1.58937	5.57563e-13	1	0	1.52874	2.91672e-15	1
TLL1	ENSG00000038295	protein_coding	0	0	-0.74778	0.413414	0	0	0.249918	0.904368	0	0	0.706222	0.686894	0
EDC4	ENSG00000038358	protein_coding	0	0	0.433515	0.0451972	1	0	-0.0465215	0.922771	0	0	-0.0897353	0.767535	0
TRIO	ENSG00000038382	protein_coding	0	0	-0.0382361	0.779738	0	0	0.411193	0.00186548	1	0	0.707241	1.3299e-10	1
VCAN	ENSG00000038427	protein_coding	0	0	0.335992	0.843333	0	0	-0.184502	0.93707	0	0	0.40097	0.838829	0
CLEC16A	ENSG00000038532	protein_coding	0	0	-0.0536524	0.852751	0	0	-0.0917027	0.83218	0	0	0.0535909	0.865126	0
MSR1	ENSG00000038945	protein_coding	0	0	-0.849832	NA	0	0	0.380163	NA	0	0	-0.48692	NA	0
CDH1	ENSG00000039068	protein_coding	0	0	-0.937358	0.16109	0	0	0.543468	0.775235	0	0	0.0721251	0.957952	0
SKIV2L2	ENSG00000039123	protein_coding	1	0	0.720742	9.57492e-11	1	0	1.04197	3.61657e-10	1	0	1.24276	2.23402e-17	1
DNAH5	ENSG00000039139	protein_coding	0	0	-0.716047	0.404443	0	0	1.13712	0.541143	0	0	0.235425	0.879427	0
ZFYVE16	ENSG00000039319	protein_coding	1	0	0.391866	0.0184596	1	0	0.811441	0.00109989	1	0	0.75076	0.000157716	1
FAM65A	ENSG00000039523	protein_coding	0	0	-0.468278	0.736741	0	0	-1.18711	0.404784	0	0	-1.93656	0.0204155	0
C6	ENSG00000039537	protein_coding	0	0	NA	NA	0	0	NA	NA	0	0	-3.33993	NA	0
RAI14	ENSG00000039560	protein_coding	1	0	0.327239	0.00330052	1	0	0.67149	8.81957e-05	1	0	0.952155	3.16034e-12	1
SOX30	ENSG00000039600	protein_coding	0	0	1.60016	NA	0	0	-0.0379037	NA	0	0	-2.62331	NA	0
PNKP	ENSG00000039650	protein_coding	0	0	-0.229106	0.559923	0	0	-0.485517	0.370456	0	0	-0.507172	0.160481	0
BEST2	ENSG00000039987	protein_coding	0	0	-2.29695	NA	0	0	-4.06527	NA	0	0	-5.00223	NA	0
PHLPP2	ENSG00000040199	protein_coding	0	0	0.508463	0.00598284	1	0	0.373077	0.23864	0	0	0.811151	0.000428597	1
SPDL1	ENSG00000040275	protein_coding	1	0	0.631273	4.44794e-05	1	0	0.735627	0.00187415	1	0	0.886759	1.14096e-05	1
STAU2	ENSG00000040341	protein_coding	0	0	0.421627	0.019934	1	0	0.231311	0.493651	0	0	0.534879	0.0230799	1
PQLC2	ENSG00000040487	protein_coding	0	0	-0.213648	0.681166	0	0	-0.0714339	0.939721	0	0	0.0239853	0.972237	0
CTNS	ENSG00000040531	protein_coding	0	0	0.0269913	0.977149	0	0	-0.21847	0.855251	0	0	0.032792	0.972151	0
RTN4R	ENSG00000040608	protein_coding	0	0	0.61319	0.264651	0	0	-0.548359	0.416615	0	0	-0.23212	0.708195	0
PHF23	ENSG00000040633	protein_coding	0	0	0.594173	0.00256713	1	0	0.588475	0.0633256	0	0	1.03848	4.43097e-05	1
CDH10	ENSG00000040731	protein_coding	0	0	-1.72739	NA	0	0	-1.48534	0.599462	0	0	-1.73405	0.488152	0
INPP4A	ENSG00000040933	protein_coding	0	0	-0.0785495	0.743391	0	0	0.090479	0.823454	0	0	0.268324	0.309797	0
RAB27B	ENSG00000041353	protein_coding	0	0	1.80302	0.282618	0	0	-0.10723	0.962925	0	0	1.76471	0.467089	0
PSMA4	ENSG00000041357	protein_coding	1	0	0.38898	0.000279439	1	0	0.694775	9.81203e-06	1	0	0.759604	1.18842e-08	1
MYO16	ENSG00000041515	protein_coding	0	0	-0.814222	0.201177	0	0	-0.667812	0.543127	0	0	-0.107961	0.926322	0
LSG1	ENSG00000041802	protein_coding	0	0	0.185624	0.351247	0	0	0.717183	0.0134614	1	0	0.969599	5.68929e-06	1
PARP3	ENSG00000041880	protein_coding	0	0	-0.472552	0.352752	0	0	-0.471157	0.586154	0	0	-0.232663	0.74567	0
TNC	ENSG00000041982	protein_coding	0	0	-0.632554	8.14392e-10	0	1	0.239066	0.308333	0	0	0.850843	1.58418e-07	1
THAP3	ENSG00000041988	protein_coding	0	0	0.65321	0.371506	0	0	0.342365	0.778859	0	0	0.552185	0.532484	0
FAM65C	ENSG00000042062	protein_coding	0	0	-1.21316	0.264651	0	0	-1.94379	0.0985142	0	0	-2.33119	0.00704626	0
TDP1	ENSG00000042088	protein_coding	0	0	0.310999	0.458313	0	0	-0.203473	0.762299	0	0	0.117363	0.824362	0
AIFM2	ENSG00000042286	protein_coding	0	0	0.847445	6.33129e-05	1	0	0.00977546	0.984478	0	0	0.382404	0.170499	0
C2orf83	ENSG00000042304	protein_coding	0	0	NA	NA	0	0	NA	NA	0	0	NA	NA	0
SPATA7	ENSG00000042317	protein_coding	0	0	-0.549754	0.381214	0	0	-0.2856	0.817756	0	0	0.639754	0.522641	0
MED17	ENSG00000042429	protein_coding	1	0	0.855888	5.04814e-05	1	0	0.903585	0.00553313	1	0	0.744696	0.00467166	1
RETSAT	ENSG00000042445	protein_coding	0	0	-0.347002	0.365753	0	0	-0.324337	0.615913	0	0	-0.367159	0.401029	0
CAPG	ENSG00000042493	protein_coding	0	0	-0.332606	0.420948	0	0	-0.133076	0.871212	0	0	-0.282567	0.560838	0
AP2S1	ENSG00000042753	protein_coding	0	0	-0.129674	0.628209	0	0	-0.91437	6.01339e-05	0	1	-0.789107	3.95763e-05	0
USH2A	ENSG00000042781	protein_coding	0	0	-3.30014	NA	0	0	-4.55649	NA	0	0	-3.33993	NA	0
ZPBP	ENSG00000042813	protein_coding	0	0	NA	NA	0	0	NA	NA	0	0	NA	NA	0
TG	ENSG00000042832	protein_coding	0	0	1.73645	NA	0	0	-1.0402	NA	0	0	-0.906234	NA	0
ADAM28	ENSG00000042980	protein_coding	0	0	-0.726707	0.660846	0	0	-0.185154	0.952377	0	0	-1.16857	0.524607	0
BARX2	ENSG00000043039	protein_coding	0	0	1.15382	NA	0	0	0.180261	0.957265	0	0	1.60749	NA	0
DCUN1D1	ENSG00000043093	protein_coding	0	0	0.237748	0.252881	0	0	0.779583	0.0107084	1	0	0.679939	0.00336693	1
JADE2	ENSG00000043143	protein_coding	0	0	0.803352	0.000133121	1	0	0.238897	0.562068	0	0	0.308321	0.275478	0
ZIC2	ENSG00000043355	protein_coding	0	0	-2.29695	NA	0	0	-2.47761	NA	0	0	-5.00223	NA	0
LCP2	ENSG00000043462	protein_coding	0	0	NA	NA	0	0	NA	NA	0	0	-4.49154	NA	0
TRIT1	ENSG00000043514	protein_coding	0	0	-0.29722	0.348219	0	0	0.235157	0.722628	0	0	0.106307	0.814492	0
ADRB1	ENSG00000043591	protein_coding	0	0	-2.29695	NA	0	0	NA	NA	0	0	-3.47269	NA	0
GUCA2B	ENSG00000044012	protein_coding	0	0	NA	NA	0	0	NA	NA	0	0	NA	NA	0
CUL7	ENSG00000044090	protein_coding	0	0	-0.189794	0.45124	0	0	-0.118572	0.798317	0	0	-0.0999597	0.76743	0
CTNNA1	ENSG00000044115	protein_coding	1	0	0.575487	1.44008e-11	1	0	1.11741	5.22051e-19	1	0	0.996967	1.62931e-19	1
PHKA2	ENSG00000044446	protein_coding	0	0	-0.172331	0.700741	0	0	5.34007e-05	0.999948	0	0	-0.17216	0.730136	0
CNTLN	ENSG00000044459	protein_coding	0	0	-0.0205014	0.973285	0	0	0.28287	0.716055	0	0	0.0327224	0.958054	0
EPHA3	ENSG00000044524	protein_coding	0	0	-0.327648	NA	0	0	-0.886625	0.745089	0	0	-1.16792	0.584993	0
HSPA5	ENSG00000044574	protein_coding	0	0	0.213469	0.0192228	0	0	0.917738	5.46991e-22	1	0	1.05208	6.61945e-33	1
DSG2	ENSG00000046604	protein_coding	0	0	0.127796	0.698012	0	0	0.926122	0.0213233	1	0	0.76997	0.0177203	1
GEMIN8	ENSG00000046647	protein_coding	0	0	-0.374711	0.729832	0	0	-0.252804	0.892208	0	0	-0.219361	0.875726	0
OFD1	ENSG00000046651	protein_coding	0	0	-0.233175	0.484341	0	0	0.593987	0.245615	0	0	0.767793	0.0608334	0
GPM6B	ENSG00000046653	protein_coding	0	0	0.588223	0.693485	0	0	0.0044545	0.998624	0	0	-0.825664	0.524842	0
MAGEC2	ENSG00000046774	protein_coding	0	0	0.972774	NA	0	0	1.69978	NA	0	0	0.812384	NA	0
PREX2	ENSG00000046889	protein_coding	0	0	1.61691	0.15475	0	0	0.509073	0.779068	0	0	0.938381	0.513158	0
WDR37	ENSG00000047056	protein_coding	0	0	0.32316	0.696476	0	0	0.10314	0.938569	0	0	0.0110955	0.990672	0
YTHDC2	ENSG00000047188	protein_coding	0	0	0.232221	0.33058	0	0	0.669641	0.0261855	1	0	0.814251	0.000850231	1
CTPS2	ENSG00000047230	protein_coding	0	0	0.136567	0.827799	0	0	0.81655	0.299009	0	0	0.343422	0.617787	0
ATP6V1H	ENSG00000047249	protein_coding	1	0	0.627999	0.00521952	1	0	0.917564	0.00725401	1	0	0.85469	0.00259948	1
POLR2B	ENSG00000047315	protein_coding	1	0	0.832054	2.73049e-23	1	0	1.38081	5.09646e-28	1	0	1.51533	4.58503e-40	1
FAM214A	ENSG00000047346	protein_coding	0	0	-0.988874	0.0527589	0	0	0.121998	0.93383	0	0	0.566847	0.604721	0
ARAP2	ENSG00000047365	protein_coding	0	0	-0.490968	0.00315816	0	1	0.435151	0.22047	0	0	0.371849	0.167557	0
TPR	ENSG00000047410	protein_coding	0	0	0.166669	0.117268	0	0	0.608683	1.7981e-05	1	0	0.904955	3.02727e-14	1
CP	ENSG00000047457	protein_coding	0	0	1.48209	NA	0	0	-0.705706	NA	0	0	-1.23209	NA	0
KIAA0556	ENSG00000047578	protein_coding	0	0	-0.259825	0.519316	0	0	-0.287592	0.651211	0	0	-0.370242	0.38909	0
DTNBP1	ENSG00000047579	protein_coding	0	0	0.340699	0.551694	0	0	-0.0958897	0.921855	0	0	0.79246	0.236483	0
XK	ENSG00000047597	protein_coding	0	0	0.280077	0.830337	0	0	0.325015	0.867706	0	0	0.128733	0.932317	0
ANO2	ENSG00000047617	protein_coding	0	0	-1.04926	0.000318143	0	1	-0.253684	0.750122	0	0	-0.0108403	0.987639	0
C12orf4	ENSG00000047621	protein_coding	0	0	0.280935	0.360809	0	0	0.356702	0.450128	0	0	0.114275	0.765266	0
SCML1	ENSG00000047634	protein_coding	0	0	0.268828	0.670738	0	0	0.0226741	0.98302	0	0	-0.288721	0.66944	0
WWC3	ENSG00000047644	protein_coding	0	0	0.204095	0.751512	0	0	0.346632	0.723797	0	0	0.46794	0.535203	0
ARHGAP6	ENSG00000047648	protein_coding	0	0	-0.370957	0.731821	0	0	0.529759	0.783395	0	0	0.692938	0.668598	0
FAM184B	ENSG00000047662	protein_coding	0	0	-1.83902	NA	0	0	-3.62193	NA	0	0	-4.93648	0.0440465	0
MAP4	ENSG00000047849	protein_coding	0	0	0.0453535	0.723287	0	0	0.310498	0.0176406	1	0	0.582154	3.07102e-08	1
GOPC	ENSG00000047932	protein_coding	0	0	0.0174298	0.957777	0	0	1.38934	6.36553e-06	1	0	1.57061	2.57211e-08	1
ROS1	ENSG00000047936	protein_coding	0	0	-2.19472	3.87142e-05	0	1	-0.909721	0.512256	0	0	0.955891	0.61525	0
USP28	ENSG00000048028	protein_coding	0	0	-0.308347	0.0588281	0	0	0.441244	0.127052	0	0	0.341591	0.128463	0
HDAC9	ENSG00000048052	protein_coding	0	0	-0.700866	0.00181637	0	1	0.556118	0.267742	0	0	0.137194	0.753655	0
TSPAN17	ENSG00000048140	protein_coding	0	0	0.242596	0.157029	0	0	0.404317	0.114407	0	0	-0.14467	0.499788	0
NOP16	ENSG00000048162	protein_coding	0	0	-0.0256452	0.961645	0	0	0.151959	0.836963	0	0	0.146073	0.901166	0
CC2D2A	ENSG00000048342	protein_coding	0	0	0.565509	0.0504812	0	0	0.429462	0.38358	0	0	0.53327	0.136562	0
RRM2B	ENSG00000048392	protein_coding	0	0	0.0579467	0.727427	0	0	1.52905	4.18524e-15	1	0	1.72215	3.6548e-27	1
ZNF800	ENSG00000048405	protein_coding	0	0	-0.580065	0.0449899	0	1	-0.230087	0.726415	0	0	-0.0134685	0.979451	0
TNFRSF17	ENSG00000048462	protein_coding	0	0	-4.87475	NA	0	0	-3.51116	NA	0	0	-3.47269	NA	0
SNX29	ENSG00000048471	protein_coding	0	0	0.122595	0.790727	0	0	0.47375	0.437747	0	0	0.506313	0.268681	0
LMO3	ENSG00000048540	protein_coding	0	0	2.60016	NA	0	0	-1.73961	NA	0	0	-1.88849	0.526295	0
MRPS10	ENSG00000048544	protein_coding	0	0	-0.105943	0.644951	0	0	0.695128	0.0140973	1	0	0.715604	0.00162395	1
GUCA1A	ENSG00000048545	protein_coding	0	0	0.604634	NA	0	0	-1.97423	NA	0	0	-0.48692	NA	0
RSF1	ENSG00000048649	protein_coding	0	0	-0.0561017	0.771536	0	0	0.818692	1.36533e-05	1	0	0.960619	1.0713e-09	1
VPS13D	ENSG00000048707	protein_coding	0	0	-0.118656	0.554746	0	0	0.0813889	0.829457	0	0	0.0880734	0.728507	0
CELF2	ENSG00000048740	protein_coding	0	0	0.401692	0.532879	0	0	0.958886	0.303023	0	0	0.439083	0.567908	0
FAM120A	ENSG00000048828	protein_coding	1	0	0.304988	0.0142617	1	0	0.689743	0.000353839	1	0	0.809847	6.46258e-08	1
R3HDM1	ENSG00000048991	protein_coding	0	0	-0.433289	0.0442628	0	1	-0.625856	0.0567768	0	0	-0.398083	0.123145	0
COL9A2	ENSG00000049089	protein_coding	0	0	0.120579	0.799656	0	0	-0.461139	0.416045	0	0	0.271828	0.580631	0
KITLG	ENSG00000049130	protein_coding	0	0	1.27713	1.32803e-05	1	0	1.3869	0.00372089	1	0	1.19025	0.0642171	0
ERCC8	ENSG00000049167	protein_coding	0	0	-0.400831	0.453098	0	0	0.00694055	0.994726	0	0	0.315998	0.685887	0
ADAMTS6	ENSG00000049192	protein_coding	0	0	-1.01594	5.06428e-08	0	1	0.102826	0.870663	0	0	-0.104064	0.796225	0
H6PD	ENSG00000049239	protein_coding	0	0	-0.79636	0.000607008	0	1	0.388629	0.481319	0	0	0.301772	0.477255	0
VAMP3	ENSG00000049245	protein_coding	0	0	0.197979	0.42537	0	0	0.270306	0.546356	0	0	0.444351	0.0980631	0
PER3	ENSG00000049246	protein_coding	0	0	-0.42589	0.00279869	0	1	0.0720957	0.851635	0	0	0.233959	0.303417	0
UTS2	ENSG00000049247	protein_coding	0	0	NA	NA	0	0	-3.60239	NA	0	0	NA	NA	0
TNFRSF9	ENSG00000049249	protein_coding	0	0	-2.6244	3.48086e-30	0	1	0.133805	0.904943	0	0	-0.0892001	0.907345	0
EPN3	ENSG00000049283	protein_coding	0	0	0.517171	0.794268	0	0	-0.628782	0.779068	0	0	-0.101435	0.963414	0
LTBP1	ENSG00000049323	protein_coding	0	0	0.065168	0.73095	0	0	0.781131	7.58059e-05	1	0	1.00296	7.33025e-09	1
RCN1	ENSG00000049449	protein_coding	0	0	0.228521	0.024739	0	0	0.64261	2.26475e-05	1	0	0.995909	1.43097e-16	1
ELN	ENSG00000049540	protein_coding	0	0	-1.44585	NA	0	0	-2.41062	NA	0	0	-2.99306	0.350426	0
RFC2	ENSG00000049541	protein_coding	0	0	0.062073	0.843333	0	0	-0.318793	0.383973	0	0	-0.0871339	0.785115	0
ARID1B	ENSG00000049618	protein_coding	0	0	-0.161414	0.262889	0	0	-0.100377	0.698479	0	0	-0.0321514	0.876839	0
CLPTM1L	ENSG00000049656	protein_coding	0	0	-0.435866	0.000474039	0	1	-0.209817	0.403568	0	0	-0.311896	0.0668582	0
NEDD4L	ENSG00000049759	protein_coding	0	0	-0.168056	0.350482	0	0	0.376008	0.163183	0	0	0.465182	0.0226791	1
FOXP3	ENSG00000049768	protein_coding	0	0	0.162752	NA	0	0	-0.819662	NA	0	0	-0.836056	NA	0
PPP1R3F	ENSG00000049769	protein_coding	0	0	-0.165106	0.902999	0	0	-0.680007	0.660738	0	0	-0.256541	0.860239	0
HEXB	ENSG00000049860	protein_coding	0	0	-0.0760705	0.87303	0	0	-0.159163	0.809562	0	0	-0.187722	0.677683	0
PTCD2	ENSG00000049883	protein_coding	0	0	-0.924549	0.0291457	0	1	-0.51889	0.54892	0	0	-0.415828	0.533839	0
KIAA2022	ENSG00000050030	protein_coding	0	0	0.8235	0.384767	0	0	1.58935	0.248764	0	0	2.32685	0.105442	0
JKAMP	ENSG00000050130	protein_coding	0	0	0.0498578	0.864104	0	0	0.601207	0.036637	1	0	0.19705	0.474145	0
DKK3	ENSG00000050165	protein_coding	0	0	0.277717	0.0194848	0	0	0.688298	4.26667e-05	1	0	0.700799	7.74761e-07	1
ARHGEF5	ENSG00000050327	protein_coding	0	0	-3.88491	NA	0	0	NA	NA	0	0	NA	NA	0
NFE2L3	ENSG00000050344	protein_coding	0	1	-1.27959	5.36186e-05	0	1	-2.35457	1.56824e-11	0	1	-2.78903	9.2035e-32	0
MCUR1	ENSG00000050393	protein_coding	0	0	0.0252457	0.948602	0	0	0.012231	0.98282	0	0	-0.411775	0.112567	0
LIMA1	ENSG00000050405	protein_coding	0	0	-0.0730893	0.631089	0	0	0.683125	0.000133494	1	0	0.581124	3.03156e-05	1
LETMD1	ENSG00000050426	protein_coding	0	0	-1.1655	5.33279e-06	0	1	-0.627963	0.232141	0	0	-1.09514	0.00042279	0
SLC4A8	ENSG00000050438	protein_coding	0	0	0.419443	0.365753	0	0	0.00709451	0.993198	0	0	-0.0527115	0.928563	0
LAMC3	ENSG00000050555	protein_coding	0	0	-0.0593204	0.911288	0	0	-0.558737	0.312087	0	0	-0.607972	0.0919061	0
PTGER3	ENSG00000050628	protein_coding	0	0	0.349403	0.871173	0	0	-0.210654	0.93977	0	0	0.456287	0.866317	0
TNIP3	ENSG00000050730	protein_coding	0	0	-0.47601	0.762663	0	0	0.739512	0.798994	0	0	1.23694	0.649023	0
MAPK9	ENSG00000050748	protein_coding	0	0	-0.310867	0.0687763	0	0	0.144859	0.706238	0	0	-0.110663	0.682147	0
COL23A1	ENSG00000050767	protein_coding	0	0	-0.849832	NA	0	0	-1.13334	NA	0	0	-2.02209	NA	0
BCAR1	ENSG00000050820	protein_coding	0	0	0.529458	2.62634e-05	1	0	0.22775	0.366054	0	0	0.476787	0.00312409	1
FAM160A2	ENSG00000051009	protein_coding	0	0	0.064937	0.879677	0	0	0.064734	0.927899	0	0	-0.740635	0.00419112	0
HERPUD1	ENSG00000051108	protein_coding	0	0	-1.07496	2.52301e-23	0	1	0.0170448	0.968173	0	0	-0.158296	0.458306	0
HOMER3	ENSG00000051128	protein_coding	0	0	0.230829	0.700434	0	0	-0.0862838	0.92882	0	0	-0.542308	0.262504	0
RAD51	ENSG00000051180	protein_coding	0	0	0.329741	0.507199	0	0	-0.174781	0.821108	0	0	-0.183572	0.729143	0
POLQ	ENSG00000051341	protein_coding	0	0	-0.120743	0.623691	0	0	-0.478434	0.0785059	0	0	-0.307569	0.225875	0
PIK3CB	ENSG00000051382	protein_coding	0	0	0.0818997	0.820615	0	0	0.898289	0.0463999	1	0	0.696427	0.0345999	1
CYBA	ENSG00000051523	protein_coding	0	0	-0.849832	NA	0	0	-1.13334	NA	0	0	-2.02209	NA	0
THOC3	ENSG00000051596	protein_coding	0	0	0.551402	0.115412	0	0	0.219423	0.735723	0	0	0.557016	0.188358	0
HEBP2	ENSG00000051620	protein_coding	0	0	-0.0191948	0.955184	0	0	0.0733091	0.879488	0	0	0.182148	0.546959	0
MPHOSPH9	ENSG00000051825	protein_coding	0	0	0.0572652	0.813517	0	0	0.132921	0.707088	0	0	0.184164	0.434884	0
PLEKHA5	ENSG00000052126	protein_coding	0	0	0.13931	0.509681	0	0	0.671538	0.0141922	1	0	0.67469	0.00102543	1
PRSS8	ENSG00000052344	protein_coding	0	0	-0.165402	NA	0	0	0.865029	NA	0	0	-1.80773	0.350426	0
SIKE1	ENSG00000052723	protein_coding	0	0	0.196302	0.358786	0	0	0.570034	0.0476943	1	0	0.429464	0.0673408	0
RRP12	ENSG00000052749	protein_coding	0	0	0.0811021	0.745002	0	0	0.401979	0.19683	0	0	0.437197	0.0765122	0
FNIP2	ENSG00000052795	protein_coding	0	0	0.743724	0.00189524	1	0	0.566713	0.143794	0	0	0.652549	0.0269924	1
MSMO1	ENSG00000052802	protein_coding	0	0	0.387932	0.31155	0	0	0.439256	0.51237	0	0	-0.0405624	0.936282	0
TTC17	ENSG00000052841	protein_coding	0	0	-0.425345	0.0454377	0	1	-0.162622	0.718738	0	0	-0.299748	0.258186	0
ALX4	ENSG00000052850	protein_coding	0	0	1.22654	0.115391	0	0	0.268532	0.834475	0	0	0.852609	0.396448	0
FSTL4	ENSG00000053108	protein_coding	0	0	-0.674013	NA	0	0	-0.87842	0.759882	0	0	0.23183	NA	0
FOXN3	ENSG00000053254	protein_coding	0	0	-0.0334082	0.873599	0	0	0.62715	0.00258639	1	0	0.977132	1.25043e-08	1
METTL24	ENSG00000053328	protein_coding	0	0	3.18322	NA	0	0	0.5916	NA	0	0	2.09076	NA	0
AKR7A2	ENSG00000053371	protein_coding	0	0	0.369757	0.201474	0	0	0.187923	0.719788	0	0	0.216229	0.541999	0
MRTO4	ENSG00000053372	protein_coding	1	0	0.421279	0.0074456	1	0	0.503593	0.0403935	1	0	0.71109	0.000253777	1
NNAT	ENSG00000053438	protein_coding	0	0	-0.263118	NA	0	0	-1.96583	0.37971	0	0	-1.93696	0.362325	0
USE1	ENSG00000053501	protein_coding	0	0	-0.925597	0.140682	0	0	-0.832051	0.433247	0	0	-0.154007	0.901789	0
MCF2L2	ENSG00000053524	protein_coding	0	0	-0.890044	0.351116	0	0	-0.817466	0.601364	0	0	0.61239	0.743512	0
NRIP2	ENSG00000053702	protein_coding	0	0	0.83673	NA	0	0	-1.12084	0.537984	0	0	-1.65588	0.163909	0
LAMA3	ENSG00000053747	protein_coding	0	0	-0.326305	0.795014	0	0	-0.129657	0.951839	0	0	0.176019	0.91917	0
AP5M1	ENSG00000053770	protein_coding	0	0	0.216512	0.335088	0	0	0.448127	0.162506	0	0	0.34913	0.167902	0
ANAPC4	ENSG00000053900	protein_coding	0	0	0.421466	0.215873	0	0	0.361726	0.519378	0	0	0.745107	0.412384	0
KCNQ1	ENSG00000053918	protein_coding	0	0	-0.849832	NA	0	0	-3.11031	NA	0	0	-0.48692	NA	0
TRAPPC3	ENSG00000054116	protein_coding	0	0	-0.0568365	0.869673	0	0	-0.0690565	0.895753	0	0	0.0279506	0.940436	0
THRAP3	ENSG00000054118	protein_coding	1	0	0.503207	1.59561e-09	1	0	1.09822	4.95392e-19	1	0	1.32791	1.90459e-33	1
PHPT1	ENSG00000054148	protein_coding	0	0	-0.41045	0.11267	0	0	-0.209154	0.690451	0	0	0.165236	0.694464	0
ENTPD2	ENSG00000054179	protein_coding	0	0	-2.28029	NA	0	0	NA	NA	0	0	NA	NA	0
LY75	ENSG00000054219	protein_coding	0	0	NA	NA	0	0	NA	NA	0	0	NA	NA	0
ARID4B	ENSG00000054267	protein_coding	1	0	0.454276	0.00555458	1	0	1.03175	3.86414e-05	1	0	1.2567	3.32956e-09	1
OPN3	ENSG00000054277	protein_coding	0	0	0.482515	NA	0	0	-1.41553	NA	0	0	-0.512503	NA	0
SDCCAG8	ENSG00000054282	protein_coding	0	0	1.16844	NA	0	0	0.934326	NA	0	0	2.50971	NA	0
PTPRN	ENSG00000054356	protein_coding	0	0	-0.273623	0.135939	0	0	-0.423136	0.108727	0	0	-0.219801	0.358029	0
HHAT	ENSG00000054392	protein_coding	0	0	1.36572	NA	0	0	1.07925	0.777986	0	0	-0.837552	0.850186	0
KIF1B	ENSG00000054523	protein_coding	0	0	0.12746	0.456263	0	0	0.572392	0.00582814	1	0	0.865209	3.07117e-07	1
FOXC1	ENSG00000054598	protein_coding	0	0	0.53032	0.277556	0	0	0.18514	0.839324	0	0	1.03964	0.0889269	0
TBC1D22A	ENSG00000054611	protein_coding	0	0	-0.202006	0.542347	0	0	0.0169672	0.980059	0	0	-0.00683729	0.987659	0
SYNE2	ENSG00000054654	protein_coding	0	0	-0.11116	0.382849	0	0	0.127741	0.566858	0	0	0.197687	0.160193	0
PLEKHH1	ENSG00000054690	protein_coding	0	0	-0.480275	0.122192	0	0	-0.117779	0.871481	0	0	-0.122136	0.804139	0
ATP9A	ENSG00000054793	protein_coding	0	0	-0.0724709	0.717187	0	0	0.562646	0.0095465	1	0	0.580751	0.000996038	1
SPO11	ENSG00000054796	protein_coding	0	0	NA	NA	0	0	NA	NA	0	0	NA	NA	0
CBLN4	ENSG00000054803	protein_coding	0	0	-0.426617	NA	0	0	-0.621118	NA	0	0	1.51469	NA	0
CHRDL2	ENSG00000054938	protein_coding	0	0	3.18322	NA	0	0	-0.789613	NA	0	0	-1.30672	0.652477	0
FAM168A	ENSG00000054965	protein_coding	0	0	0.258363	0.187543	0	0	0.137697	0.712897	0	0	0.375548	0.101513	0
RELT	ENSG00000054967	protein_coding	0	0	0.427007	0.490128	0	0	-1.34451	0.00590965	0	1	-1.26054	0.00136584	0
GALC	ENSG00000054983	protein_coding	0	0	-0.0479649	0.90717	0	0	0.971073	0.0273704	1	0	0.960442	0.0118047	1
NOP58	ENSG00000055044	protein_coding	0	0	0.247591	0.0420541	0	0	0.737668	1.1654e-05	1	0	0.744476	6.68319e-08	1
SZRD1	ENSG00000055070	protein_coding	1	0	0.615177	2.90169e-07	1	0	0.418339	0.0343903	1	0	0.541098	0.000772858	1
KCNH2	ENSG00000055118	protein_coding	0	0	0.187723	0.752887	0	0	-0.0788537	0.935288	0	0	-0.386158	0.465673	0
CUL1	ENSG00000055130	protein_coding	0	0	0.46392	0.0563619	0	0	1.02905	0.00386289	1	0	0.868845	0.00320973	1
FAM114A2	ENSG00000055147	protein_coding	0	0	0.00873672	0.9853	0	0	1.0924	0.0306927	1	0	1.49503	0.000298412	1
CYFIP2	ENSG00000055163	protein_coding	0	0	-0.874077	1.38405e-08	0	1	-0.389718	0.24443	0	0	-0.130457	0.69081	0
TAB2	ENSG00000055208	protein_coding	0	0	-0.00976195	0.963061	0	0	0.326959	0.18613	0	0	0.559369	0.000286534	1
GINM1	ENSG00000055211	protein_coding	0	0	0.0300673	0.941962	0	0	0.435798	0.346924	0	0	0.341094	0.34109	0
EIF2AK2	ENSG00000055332	protein_coding	0	0	-0.244148	0.0959292	0	0	0.295319	0.263112	0	0	0.389584	0.0392134	1
USP36	ENSG00000055483	protein_coding	0	0	-0.101721	0.652799	0	0	-0.220146	0.479808	0	0	-0.0692508	0.798022	0
KMT2C	ENSG00000055609	protein_coding	0	0	-0.449432	0.0384261	0	1	-0.255315	0.545215	0	0	-0.376882	0.162079	0
MCOLN3	ENSG00000055732	protein_coding	0	0	NA	NA	0	0	-4.06527	NA	0	0	-3.47269	NA	0
CCDC85A	ENSG00000055813	protein_coding	0	0	1.80295	0.0782077	0	0	0.217457	0.899319	0	0	0.505614	0.696685	0
PUM2	ENSG00000055917	protein_coding	1	0	0.3581	0.000215171	1	0	1.27748	9.18123e-20	1	0	1.47122	1.93724e-31	1
MRPL43	ENSG00000055950	protein_coding	0	0	0.0187402	0.967192	0	0	0.35749	0.508502	0	0	0.0565262	0.905415	0
ITIH4	ENSG00000055955	protein_coding	0	0	NA	NA	0	0	-4.4645	NA	0	0	NA	NA	0
ITIH1	ENSG00000055957	protein_coding	0	0	NA	NA	0	0	NA	NA	0	0	NA	NA	0
HPF1	ENSG00000056050	protein_coding	0	0	0.0755925	0.879826	0	0	0.528349	0.386934	0	0	0.839094	0.0698716	0
ZFR	ENSG00000056097	protein_coding	1	0	0.304833	0.0021032	1	0	0.737557	5.41853e-07	1	0	0.975035	9.73443e-16	1
ZNF280C	ENSG00000056277	protein_coding	0	0	-0.0875669	0.892269	0	0	-0.447277	0.545075	0	0	-0.418775	0.439386	0
NPFFR2	ENSG00000056291	protein_coding	0	0	-0.214397	0.686557	0	0	-0.401987	0.551564	0	0	0.0868581	0.894393	0
PHF21B	ENSG00000056487	protein_coding	0	0	-0.200071	0.616633	0	0	-0.526123	0.275205	0	0	-0.131045	0.786792	0
TRAF1	ENSG00000056558	protein_coding	0	0	-1.95777	0.000219658	0	1	0.516204	0.796348	0	0	-0.473595	0.705686	0
RC3H2	ENSG00000056586	protein_coding	1	0	0.43662	0.00884897	1	0	0.674175	0.00384303	1	0	0.896214	3.994e-06	1
IL17RB	ENSG00000056736	protein_coding	0	0	0.774127	0.444634	0	0	0.189294	0.91436	0	0	-0.248865	0.828819	0
TRAF3IP2	ENSG00000056972	protein_coding	0	0	-0.784064	0.0704428	0	0	-0.148091	0.894398	0	0	-0.621834	0.273928	0
GYG2	ENSG00000056998	protein_coding	0	0	0.349875	0.390495	0	0	-0.0498523	0.948447	0	0	0.219963	0.658594	0
DCBLD2	ENSG00000057019	protein_coding	1	0	0.797506	1.56998e-20	1	0	0.845102	1.43429e-13	1	0	0.670772	2.79287e-10	1
SERPINB3	ENSG00000057149	protein_coding	0	0	NA	NA	0	0	NA	NA	0	0	NA	NA	0
SOAT1	ENSG00000057252	protein_coding	0	0	0.212866	0.300286	0	0	0.706625	0.0075682	1	0	0.153867	0.53805	0
PKP2	ENSG00000057294	protein_coding	0	0	0.0304905	0.913519	0	0	0.613823	0.0309896	1	0	0.719584	0.00165644	1
MSH4	ENSG00000057468	protein_coding	0	0	-3.17365	NA	0	0	-2.62476	NA	0	0	-0.493993	NA	0
F7	ENSG00000057593	protein_coding	0	0	0.598342	NA	0	0	-1.97793	NA	0	0	-3.04541	NA	0
GDI2	ENSG00000057608	protein_coding	0	0	-0.148998	0.150964	0	0	0.296505	0.0606587	0	0	0.474512	8.40407e-05	1
PRDM1	ENSG00000057657	protein_coding	0	0	0.91059	0.273658	0	0	0.775076	0.529464	0	0	1.17723	0.277501	0
ATG5	ENSG00000057663	protein_coding	0	0	0.363364	0.382849	0	0	0.489167	0.462971	0	0	0.511057	0.58616	0
TMCC3	ENSG00000057704	protein_coding	0	0	1.01733	0.470456	0	0	0.628841	0.771301	0	0	0.923649	0.619585	0
PITHD1	ENSG00000057757	protein_coding	0	0	0.201521	0.462602	0	0	0.250724	0.569515	0	0	0.236072	0.453184	0
MTA3	ENSG00000057935	protein_coding	0	0	-0.130068	0.583005	0	0	-0.0956342	0.821108	0	0	0.309769	0.260352	0
USP13	ENSG00000058056	protein_coding	1	0	0.487769	0.000426335	1	0	0.898905	1.84482e-05	1	0	1.45033	1.24564e-14	1
ATP11B	ENSG00000058063	protein_coding	0	0	-0.0404301	0.836354	0	0	0.820197	7.21053e-05	1	0	0.696108	1.71704e-05	1
LAMC2	ENSG00000058085	protein_coding	0	0	-0.0925905	0.73967	0	0	1.30629	0.000200774	1	0	1.61682	1.06802e-07	1
CDK14	ENSG00000058091	protein_coding	0	0	0.248208	0.0568485	0	0	0.728687	2.07949e-05	1	0	0.802696	3.74891e-08	1
SEC61A1	ENSG00000058262	protein_coding	0	0	0.350518	0.000205797	1	0	0.289156	0.0575693	0	0	-0.266871	0.0207229	0
PPP1R12A	ENSG00000058272	protein_coding	0	0	0.0974412	0.578963	0	0	1.20665	2.05953e-08	1	0	1.41745	2.67972e-05	1
RASGRF1	ENSG00000058335	protein_coding	0	0	-0.524338	0.0747055	0	0	-0.445806	0.372402	0	0	-0.413612	0.270149	0
CAMK2B	ENSG00000058404	protein_coding	0	0	1.16708	NA	0	0	-0.105476	NA	0	0	-0.980723	0.717901	0
CROCC	ENSG00000058453	protein_coding	0	0	0.228367	0.687475	0	0	-0.728156	0.167552	0	0	-0.351132	0.505838	0
POLR3E	ENSG00000058600	protein_coding	0	0	-0.304108	0.191834	0	0	0.0428299	0.939409	0	0	0.00477052	0.990287	0
ATP2B4	ENSG00000058668	protein_coding	0	0	0.649486	5.09148e-05	1	0	0.363136	0.197185	0	0	0.199303	0.395588	0
ZC3H11A	ENSG00000058673	protein_coding	0	0	0.0119376	0.949663	0	0	0.617766	0.000653985	1	0	0.929199	9.5032e-12	1
RIOK2	ENSG00000058729	protein_coding	1	0	0.607462	0.0106307	1	0	0.812022	0.0295754	1	0	1.10883	0.000209713	1
YIPF1	ENSG00000058799	protein_coding	0	0	-0.574778	0.144692	0	0	-0.208581	0.813389	0	0	-0.491851	0.332581	0
NDC1	ENSG00000058804	protein_coding	0	0	0.767003	6.55257e-07	1	0	0.86905	0.000173581	1	0	0.321662	0.127232	0
DGKG	ENSG00000058866	protein_coding	0	0	0.765978	0.341924	0	0	0.8151	0.499043	0	0	0.113588	0.912332	0
FLYWCH1	ENSG00000059122	protein_coding	0	0	-0.221811	0.550286	0	0	-0.387666	0.446838	0	0	-0.976263	0.000220011	0
UNKL	ENSG00000059145	protein_coding	0	0	1.02369	0.000318214	1	0	0.530653	0.239298	0	0	0.277317	0.460466	0
TBXAS1	ENSG00000059377	protein_coding	0	0	-1.2499	NA	0	0	-2.98169	0.203396	0	0	-3.55229	0.0485705	0
PARP12	ENSG00000059378	protein_coding	0	0	0.16938	0.718842	0	0	0.141441	0.855996	0	0	0.402876	0.4094	0
ALDH18A1	ENSG00000059573	protein_coding	0	0	-0.0032722	0.98791	0	0	0.298062	0.200406	0	0	0.388807	0.030422	1
TARBP1	ENSG00000059588	protein_coding	0	0	-0.71403	0.265491	0	0	-0.0700537	0.962841	0	0	-0.378416	0.687592	0
GATB	ENSG00000059691	protein_coding	0	0	0.0791613	0.906778	0	0	0.304964	0.731073	0	0	0.289879	0.65532	0
MXD1	ENSG00000059728	protein_coding	0	1	-1.50074	0.00961503	0	1	-1.64316	0.0440466	0	1	-1.53869	0.0262975	0
CDK17	ENSG00000059758	protein_coding	0	0	0.303521	0.254257	0	0	0.973677	0.0110429	1	0	1.04376	0.000528067	1
DNAJC25	ENSG00000059769	protein_coding	0	0	0.640446	0.332078	0	0	1.0006	0.324688	0	0	0.947736	0.256709	0
SLC2A3	ENSG00000059804	protein_coding	0	0	0.594996	0.000284517	1	0	0.0347417	0.931352	0	0	-0.350773	0.0517211	0
PSD	ENSG00000059915	protein_coding	0	0	0.414092	0.583661	0	0	-0.508639	0.588575	0	0	-0.0189505	0.982839	0
CTDP1	ENSG00000060069	protein_coding	0	0	0.807911	0.0387256	1	0	0.652432	0.296118	0	0	0.731938	0.137618	0
YBX3	ENSG00000060138	protein_coding	0	1	-0.373224	4.7192e-05	0	1	-0.404838	0.00231028	0	1	-0.0225118	0.89964	0
STYK1	ENSG00000060140	protein_coding	0	0	0.297239	0.829461	0	0	-0.0421631	0.983022	0	0	0.11021	0.94456	0
WNK1	ENSG00000060237	protein_coding	0	0	-0.164138	0.116878	0	0	-0.094965	0.64251	0	0	0.0823908	0.577363	0
RPS17P5	ENSG00000060303	processed_pseudogene	0	0	NA	NA	0	0	NA	NA	0	0	NA	NA	0
CCAR1	ENSG00000060339	protein_coding	0	0	0.255492	0.0376233	0	0	0.753789	6.94987e-05	1	0	0.84113	5.49548e-09	1
OGFR	ENSG00000060491	protein_coding	0	0	0.610236	0.000630066	1	0	0.0939088	0.820006	0	0	0.690766	0.00162811	1
GNA15	ENSG00000060558	protein_coding	0	0	NA	NA	0	0	-2.58625	NA	0	0	-3.33993	NA	0
CREB3L3	ENSG00000060566	protein_coding	0	0	-2.28029	NA	0	0	-3.41412	NA	0	0	NA	NA	0
PIGV	ENSG00000060642	protein_coding	0	0	-1.12026	0.00484652	0	1	-0.460044	0.61664	0	0	-1.88732	9.92204e-08	0
PTPRU	ENSG00000060656	protein_coding	0	0	0.26551	0.253186	0	0	0.0585993	0.904368	0	0	0.194555	0.505838	0
SNRNP40	ENSG00000060688	protein_coding	0	0	0.252097	0.151413	0	0	0.267764	0.348814	0	0	0.271273	0.209054	0
RIMBP2	ENSG00000060709	protein_coding	0	0	-0.593229	0.616225	0	0	-0.57559	0.755532	0	0	-0.863814	0.490428	0
COL11A1	ENSG00000060718	protein_coding	0	0	-0.315217	0.111904	0	0	0.0655592	0.890566	0	0	0.520205	0.0507896	0
QSER1	ENSG00000060749	protein_coding	0	0	0.106192	0.452753	0	0	0.237936	0.260071	0	0	0.411487	0.00258899	1
MPC1	ENSG00000060762	protein_coding	0	0	-0.797309	0.0284544	0	1	-0.00220161	0.998404	0	0	0.173143	0.806602	0
ACAA1	ENSG00000060971	protein_coding	0	0	0.215237	0.64105	0	0	0.394138	0.553632	0	0	0.412989	0.408948	0
BCAT1	ENSG00000060982	protein_coding	0	0	-0.330135	0.000269474	0	1	1.00957	2.17475e-12	1	0	1.14567	1.48541e-20	1
HDAC7	ENSG00000061273	protein_coding	0	0	0.0505234	0.825202	0	0	-0.161866	0.565122	0	0	-0.15713	0.433571	0
LZTS1	ENSG00000061337	protein_coding	0	0	2.45381	5.0064e-06	1	0	1.05827	0.140169	0	0	0.205316	0.739811	0
PRDM6	ENSG00000061455	protein_coding	0	0	0.7336	NA	0	0	2.96329	NA	0	0	-0.254393	NA	0
WNT8A	ENSG00000061492	protein_coding	0	0	NA	NA	0	0	NA	NA	0	0	-3.47269	NA	0
SPAG4	ENSG00000061656	protein_coding	0	0	0.109118	0.944861	0	0	-1.48964	0.147526	0	0	-1.42584	0.087512	0
NCKAP1	ENSG00000061676	protein_coding	0	0	-0.0201759	0.891536	0	0	0.996766	4.29515e-12	1	0	1.02382	6.28202e-19	1
MRPS35	ENSG00000061794	protein_coding	0	0	0.274396	0.261879	0	0	0.694436	0.0449314	1	0	1.08778	4.91593e-05	1
GUCY1B3	ENSG00000061918	protein_coding	0	0	1.42859	0.0478965	1	0	0.763765	0.498761	0	0	0.727468	0.422711	0
SFSWAP	ENSG00000061936	protein_coding	0	0	0.115322	0.639042	0	0	-0.0808349	0.846059	0	0	0.168845	0.534136	0
TNK2	ENSG00000061938	protein_coding	0	0	0.0419293	0.93733	0	0	-0.725246	0.0775745	0	0	-0.763486	0.0123424	0
MON2	ENSG00000061987	protein_coding	0	0	-0.160431	0.46782	0	0	-0.020676	0.965336	0	0	0.219478	0.413478	0
CDH3	ENSG00000062038	protein_coding	0	0	0.604634	NA	0	0	-1.03278	NA	0	0	-0.48692	NA	0
ARSF	ENSG00000062096	protein_coding	0	0	0.604634	NA	0	0	-1.13334	NA	0	0	-0.48692	NA	0
GPBP1	ENSG00000062194	protein_coding	1	0	0.300125	0.0233692	1	0	0.765135	5.43691e-05	1	0	0.898444	9.22392e-09	1
DGAT2	ENSG00000062282	protein_coding	0	0	-0.176752	0.831777	0	0	0.309879	0.817252	0	0	-0.584411	0.397868	0
ZNF112	ENSG00000062370	protein_coding	0	0	-0.224066	0.745768	0	0	0.0591825	0.959852	0	0	0.638137	0.429769	0
CS	ENSG00000062485	protein_coding	0	0	0.275342	0.00929863	0	0	0.0992546	0.680514	0	0	-0.0381324	0.823449	0
LTK	ENSG00000062524	protein_coding	0	0	-1.85289	NA	0	0	-3.02165	NA	0	0	-2.82066	NA	0
MRPS24	ENSG00000062582	protein_coding	0	0	0.169326	NA	0	0	-1.65293	NA	0	0	-1.61909	NA	0
ELMO2	ENSG00000062598	protein_coding	1	0	0.364259	0.0166516	1	0	0.473623	0.0472464	1	0	0.941504	5.14043e-07	1
WAPL	ENSG00000062650	protein_coding	1	0	0.328224	0.00120782	1	0	1.28628	1.45928e-17	1	0	1.29473	2.80095e-22	1
VMP1	ENSG00000062716	protein_coding	0	1	-0.777107	3.81272e-14	0	1	-1.06794	5.83952e-15	0	1	-1.26828	1.47712e-29	0
APPBP2	ENSG00000062725	protein_coding	1	0	0.375333	0.00462369	1	0	0.628543	0.00108505	1	0	0.772691	1.98166e-06	1
POLD1	ENSG00000062822	protein_coding	0	0	-0.194467	0.290596	0	0	-0.270549	0.350793	0	0	-0.257848	0.213838	0
SEZ6	ENSG00000063015	protein_coding	0	0	-0.421136	NA	0	0	-1.474	NA	0	0	-2.48775	0.278335	0
EIF4B	ENSG00000063046	protein_coding	0	0	0.268864	0.000720132	0	0	1.11792	1.09658e-19	1	0	1.20156	1.02599e-36	1
SLC6A16	ENSG00000063127	protein_coding	0	0	0.479856	0.524019	0	0	-0.678857	0.419684	0	0	-1.52145	0.000779159	0
GLTSCR1	ENSG00000063169	protein_coding	0	0	-0.143688	0.781374	0	0	-0.696802	0.17437	0	0	-0.693534	0.0715597	0
SPHK2	ENSG00000063176	protein_coding	0	0	-0.65629	0.0748671	0	0	-0.469786	0.482343	0	0	-1.2387	0.00018217	0
RPL18	ENSG00000063177	protein_coding	0	0	-0.265822	0.0103856	0	0	-0.51546	8.02308e-05	0	1	-0.165321	0.283236	0
CA11	ENSG00000063180	protein_coding	0	0	-0.955142	0.0022968	0	1	-0.472926	0.433419	0	0	-0.594634	0.148792	0
ISOC2	ENSG00000063241	protein_coding	0	0	0.0514555	0.91467	0	0	0.119725	0.863037	0	0	-0.00617486	0.990287	0
U2AF2	ENSG00000063244	protein_coding	1	0	0.410849	0.000111007	1	0	0.364303	0.0457211	1	0	0.387025	0.00476232	1
EPN1	ENSG00000063245	protein_coding	0	0	0.309796	0.0947159	0	0	-0.194923	0.546804	0	0	-0.183648	0.408645	0
MED29	ENSG00000063322	protein_coding	0	0	0.0344603	0.909502	0	0	0.142256	0.735083	0	0	-0.45077	0.0274243	0
AHRR	ENSG00000063438	protein_coding	0	0	0.799165	0.278171	0	0	0.401459	0.749261	0	0	-0.15141	0.873221	0
GSC2	ENSG00000063515	protein_coding	0	0	0.598342	NA	0	0	0.375627	NA	0	0	-0.493993	NA	0
ZNF275	ENSG00000063587	protein_coding	0	0	0.55253	0.0434461	1	0	-0.0788882	0.889063	0	0	-0.369559	0.209874	0
MTMR1	ENSG00000063601	protein_coding	0	0	0.682743	0.0145211	1	0	0.718262	0.100792	0	0	0.68745	0.0487204	1
GPC1	ENSG00000063660	protein_coding	0	0	0.342911	0.00117773	1	0	0.101029	0.658166	0	0	0.295891	0.0205532	0
ADCK1	ENSG00000063761	protein_coding	0	0	-0.559559	0.495796	0	0	0.246005	0.889	0	0	-0.451807	0.667251	0
HAGH	ENSG00000063854	protein_coding	0	0	-0.188796	0.732357	0	0	0.220533	0.811057	0	0	0.208091	0.748538	0
RNF4	ENSG00000063978	protein_coding	0	0	0.505013	0.0274988	1	0	0.126248	0.779174	0	0	0.0279659	0.932317	0
CASP8	ENSG00000064012	protein_coding	0	0	0.195462	0.49689	0	0	0.776831	0.0407672	1	0	0.584626	0.0534204	0
LIMCH1	ENSG00000064042	protein_coding	1	0	0.784484	2.07061e-11	1	0	0.541944	0.00385214	1	0	0.92941	2.76785e-10	1
ASUN	ENSG00000064102	protein_coding	0	0	0.157889	0.563089	0	0	0.399896	0.254573	0	0	0.406867	0.129394	0
TM7SF3	ENSG00000064115	protein_coding	0	0	0.0498096	0.858867	0	0	0.51384	0.0916451	0	0	0.225644	0.386296	0
DLX3	ENSG00000064195	protein_coding	0	0	3.24847	NA	0	0	-0.460445	0.852392	0	0	-0.458032	0.822066	0
SPA17	ENSG00000064199	protein_coding	0	0	-1.2404	0.214193	0	0	-0.829914	0.658567	0	0	-1.28577	0.29963	0
TSPAN32	ENSG00000064201	protein_coding	0	0	1.60016	NA	0	0	1.37693	NA	0	0	0.508056	NA	0
WISP2	ENSG00000064205	protein_coding	0	0	-0.842197	NA	0	0	-0.976777	NA	0	0	-1.2929	0.71758	0
DMRT3	ENSG00000064218	protein_coding	0	0	3.18514	NA	0	0	0.592628	NA	0	0	-0.442114	NA	0
ST3GAL6	ENSG00000064225	protein_coding	0	0	0.156374	0.851027	0	0	-0.696674	0.382543	0	0	-0.208538	0.798022	0
ATP2C2	ENSG00000064270	protein_coding	0	0	-0.0372386	NA	0	0	-2.36194	0.194311	0	0	-2.46691	0.118089	0
NGFR	ENSG00000064300	protein_coding	0	0	2.30612	0.00839684	1	0	-0.0403056	0.977549	0	0	1.42928	0.181752	0
CDON	ENSG00000064309	protein_coding	0	0	0.079111	0.882257	0	0	0.703797	0.282267	0	0	0.330322	0.530788	0
TAF2	ENSG00000064313	protein_coding	0	0	-0.0952401	0.607295	0	0	0.440409	0.0676302	0	0	0.611067	0.000546235	1
HIPK2	ENSG00000064393	protein_coding	0	0	-0.133047	0.635486	0	0	-0.0279618	0.957247	0	0	0.0797732	0.817177	0
TNPO3	ENSG00000064419	protein_coding	0	0	0.0372339	0.871063	0	0	0.322494	0.213688	0	0	0.500649	0.00724304	1
BORCS8-MEF2B	ENSG00000064489	protein_coding	0	0	NA	NA	0	0	NA	NA	0	0	NA	NA	0
RFXANK	ENSG00000064490	protein_coding	0	0	-0.17762	0.797687	0	0	-0.287623	0.777886	0	0	-0.650236	0.247453	0
TMEM161A	ENSG00000064545	protein_coding	0	0	-0.55596	0.378434	0	0	-0.662951	0.486274	0	0	-1.28042	0.0137622	0
LPAR2	ENSG00000064547	protein_coding	0	0	-0.844184	NA	0	0	-1.35019	0.549451	0	0	-2.86932	0.00693712	0
CTSA	ENSG00000064601	protein_coding	0	0	-0.291597	0.25045	0	0	-0.633908	0.0466143	0	1	-0.931272	8.56369e-06	0
SUGP2	ENSG00000064607	protein_coding	0	0	-0.201796	0.266369	0	0	-0.084143	0.823097	0	0	-0.218827	0.31677	0
SLC12A2	ENSG00000064651	protein_coding	1	0	0.742974	7.30562e-08	1	0	0.772881	0.00038609	1	0	0.893304	6.05908e-07	1
SNX24	ENSG00000064652	protein_coding	0	0	-0.876982	0.000908705	0	1	0.195894	0.79474	0	0	0.334972	0.499561	0
EYA2	ENSG00000064655	protein_coding	0	0	0.800754	0.418525	0	0	0.217805	0.899319	0	0	-0.282102	0.794418	0
CNN2	ENSG00000064666	protein_coding	0	0	0.129176	0.37722	0	0	-0.0841416	0.746881	0	0	-0.358668	0.00678593	0
ABCA7	ENSG00000064687	protein_coding	0	0	-0.481819	0.537519	0	0	-1.16526	0.150031	0	0	-1.12753	0.0821008	0
SNCAIP	ENSG00000064692	protein_coding	0	0	1.60583	NA	0	0	-1.73673	NA	0	0	0.514414	NA	0
DDX20	ENSG00000064703	protein_coding	1	0	1.17726	3.28182e-14	1	0	1.15588	1.36874e-06	1	0	1.10203	4.17734e-08	1
BTBD1	ENSG00000064726	protein_coding	1	0	0.466467	0.00142233	1	0	1.32656	1.69429e-09	1	0	1.08416	8.84807e-09	1
FAR2	ENSG00000064763	protein_coding	0	0	-0.629724	0.544226	0	0	-0.830565	0.568192	0	0	-1.16945	0.227083	0
BCAS1	ENSG00000064787	protein_coding	0	0	0.153921	NA	0	0	2.96191	NA	0	0	2.093	NA	0
POU1F1	ENSG00000064835	protein_coding	0	0	-2.29695	NA	0	0	-2.58625	NA	0	0	NA	NA	0
CHI3L2	ENSG00000064886	protein_coding	0	0	-1.25898	NA	0	0	0.463675	NA	0	0	-1.97154	NA	0
SBNO2	ENSG00000064932	protein_coding	0	0	0.26244	0.770682	0	0	0.658904	0.62735	0	0	0.118066	0.911016	0
PMS1	ENSG00000064933	protein_coding	0	0	-0.526601	0.0916192	0	0	0.418124	0.535728	0	0	0.454179	0.356666	0
HMG20B	ENSG00000064961	protein_coding	0	0	0.19843	0.655724	0	0	0.297662	0.450748	0	0	0.386263	0.352012	0
CALCRL	ENSG00000064989	protein_coding	0	0	-3.42741	NA	0	0	-1.14908	NA	0	0	-1.01554	NA	0
TAF11	ENSG00000064995	protein_coding	1	0	0.881903	4.51158e-05	1	0	0.955597	0.00367867	1	0	1.30756	5.86938e-06	1
ANKS1A	ENSG00000064999	protein_coding	0	0	0.213373	0.366453	0	0	0.369113	0.291325	0	0	0.618055	0.0147852	1
AP3D1	ENSG00000065000	protein_coding	0	0	-0.225446	0.132722	0	0	0.173249	0.577941	0	0	0.319805	0.103182	0
ZNF76	ENSG00000065029	protein_coding	0	0	-0.953311	0.000249068	0	1	-0.326525	0.580527	0	0	-0.483166	0.193507	0
SLC9A3R2	ENSG00000065054	protein_coding	0	0	0.699361	0.0496904	1	0	0.0865997	0.904368	0	0	0.257081	0.570108	0
NTHL1	ENSG00000065057	protein_coding	0	0	0.3715	0.678421	0	0	0.132229	0.923551	0	0	0.379896	0.698414	0
UHRF1BP1	ENSG00000065060	protein_coding	0	0	-1.2156	8.25804e-39	0	1	0.566392	0.00779238	1	0	0.701597	2.67903e-05	1
GNAI3	ENSG00000065135	protein_coding	0	0	0.271338	0.0148414	0	0	0.369435	0.0204776	1	0	0.241674	0.0725204	0
IPO5	ENSG00000065150	protein_coding	0	0	0.174844	0.0754636	0	0	0.889464	2.99373e-12	1	0	0.948327	3.48373e-18	1
OAT	ENSG00000065154	protein_coding	0	0	0.263408	0.169013	0	0	0.668991	0.0104021	1	0	0.776269	0.0550818	0
WDR3	ENSG00000065183	protein_coding	0	0	0.360695	0.145326	0	0	1.26866	5.82857e-11	1	0	1.34184	5.45807e-15	1
PKN2	ENSG00000065243	protein_coding	0	0	-0.00266055	0.991114	0	0	0.889978	0.000119045	1	0	0.659463	0.000332902	1
WDR18	ENSG00000065268	protein_coding	0	0	-0.624273	0.0413989	0	1	-0.771816	0.0825813	0	0	-0.546413	0.149129	0
TRAM2	ENSG00000065308	protein_coding	0	0	0.590304	7.36581e-06	1	0	-0.1362	0.610848	0	0	-0.458978	0.00111877	0
NTN1	ENSG00000065320	protein_coding	0	0	0.755138	0.00745753	1	0	0.451462	0.334223	0	0	0.17882	0.644583	0
GLP2R	ENSG00000065325	protein_coding	0	0	-0.344154	0.246076	0	0	0.13451	0.844804	0	0	-0.853884	0.00149109	0
MCM10	ENSG00000065328	protein_coding	1	0	0.721851	1.62206e-09	1	0	0.812672	3.91007e-05	1	0	1.18695	7.38671e-14	1
DGKA	ENSG00000065357	protein_coding	0	0	-0.379434	0.410741	0	0	0.227537	0.806322	0	0	-0.136669	0.826172	0
ERBB3	ENSG00000065361	protein_coding	0	0	-0.258392	0.738258	0	0	-0.702732	0.460664	0	0	-0.154334	0.870313	0
ROPN1	ENSG00000065371	protein_coding	0	0	NA	NA	0	0	NA	NA	0	0	NA	NA	0
ANKRD44	ENSG00000065413	protein_coding	0	0	0.486421	NA	0	0	-0.785381	0.788369	0	0	-1.25656	0.555702	0
KARS	ENSG00000065427	protein_coding	0	0	0.184353	0.129476	0	0	0.105993	0.656395	0	0	0.449864	0.000982015	1
ADAT1	ENSG00000065457	protein_coding	0	0	-0.33516	0.159771	0	0	0.246767	0.622127	0	0	-0.0851417	0.819797	0
PDIA5	ENSG00000065485	protein_coding	0	0	0.516003	0.15863	0	0	-0.193402	0.771104	0	0	0.185069	0.704097	0
TBC1D22B	ENSG00000065491	protein_coding	0	0	-0.0827316	0.820615	0	0	0.259317	0.620093	0	0	0.592482	0.103106	0
NDUFB4	ENSG00000065518	protein_coding	0	0	-0.328154	0.369326	0	0	-1.53691	2.81668e-07	0	1	-0.840486	0.00726137	0
SPEN	ENSG00000065526	protein_coding	0	0	-0.0105649	0.968722	0	0	0.0109263	0.978852	0	0	0.468726	0.0182962	1
MYLK	ENSG00000065534	protein_coding	1	0	0.841506	4.5011e-06	1	0	0.637447	0.0279357	1	0	0.925021	8.85086e-05	1
ZC3H15	ENSG00000065548	protein_coding	0	0	0.156712	0.315902	0	0	0.793075	6.46139e-05	1	0	0.916644	7.16914e-09	1
MAP2K4	ENSG00000065559	protein_coding	1	0	0.618226	0.000253294	1	0	0.96948	0.000210354	1	0	1.00854	3.69483e-06	1
TMEM206	ENSG00000065600	protein_coding	0	0	0.129193	0.807475	0	0	0.642893	0.337266	0	0	0.895231	0.097713	0
SNAP91	ENSG00000065609	protein_coding	0	0	-0.847556	0.618088	0	0	0.240523	0.946365	0	0	0.0354307	0.990672	0
SLK	ENSG00000065613	protein_coding	1	0	0.497246	0.000332825	1	0	1.05334	3.08455e-07	1	0	1.24186	1.20487e-11	1
CYB5R4	ENSG00000065615	protein_coding	0	0	0.134578	0.737512	0	0	0.305863	0.605208	0	0	-0.0461281	0.918325	0
COL17A1	ENSG00000065618	protein_coding	0	0	-1.61612	0.00852081	0	1	-1.46067	0.142358	0	0	-0.541129	0.674512	0
GSTO2	ENSG00000065621	protein_coding	0	0	-0.214319	0.657548	0	0	-0.514515	0.38279	0	0	-0.73429	0.0553453	0
SEC61A2	ENSG00000065665	protein_coding	0	0	-0.0787664	0.864107	0	0	-0.0819941	0.907545	0	0	-0.623682	0.050811	0
PRKCQ	ENSG00000065675	protein_coding	0	0	0.0578921	0.924791	0	0	0.512485	0.484739	0	0	0.548183	0.344585	0
TLE2	ENSG00000065717	protein_coding	0	0	-0.606989	0.0635044	0	0	-0.35424	0.582476	0	0	-0.543858	0.180127	0
ASB1	ENSG00000065802	protein_coding	0	0	-0.303229	0.249901	0	0	0.275731	0.591905	0	0	0.348116	0.309636	0
FAM107B	ENSG00000065809	protein_coding	0	0	-0.934251	2.31116e-15	0	1	1.09332	1.29653e-05	1	0	1.17822	4.99083e-08	1
ME1	ENSG00000065833	protein_coding	0	0	0.137137	0.677075	0	0	0.454359	0.315459	0	0	0.271407	0.440776	0
TBC1D1	ENSG00000065882	protein_coding	0	0	0.152068	0.212843	0	0	0.436338	0.005206	1	0	0.524137	8.5638e-05	1
CDK13	ENSG00000065883	protein_coding	0	0	-0.012793	0.957838	0	0	0.586625	0.00877702	1	0	1.18723	8.63634e-10	1
MTHFD2	ENSG00000065911	protein_coding	0	0	-0.432681	1.38281e-07	0	1	1.04355	3.22278e-13	1	0	0.975757	4.57256e-19	1
SLC9A7	ENSG00000065923	protein_coding	0	0	0.210231	0.536299	0	0	0.58391	0.214188	0	0	0.218522	0.576221	0
FOXJ2	ENSG00000065970	protein_coding	0	0	-0.0157693	0.956864	0	0	-0.0837177	0.831894	0	0	-0.158752	0.51766	0
YBX1	ENSG00000065978	protein_coding	0	0	-0.268345	0.000287778	0	0	-0.605526	3.36273e-11	0	1	-0.101302	0.430304	0
PDE4A	ENSG00000065989	protein_coding	0	0	0.349237	0.364091	0	0	-0.0964218	0.884345	0	0	-0.365724	0.299523	0
PPP2R5A	ENSG00000066027	protein_coding	1	0	0.612984	0.00364394	1	0	1.44629	1.01741e-05	1	0	0.857325	0.00132749	1
CTNNA2	ENSG00000066032	protein_coding	0	0	0.843997	NA	0	0	1.32673	0.660569	0	0	-0.0186054	0.993855	0
ELAVL1	ENSG00000066044	protein_coding	0	0	0.209934	0.196291	0	0	0.35139	0.144416	0	0	0.386298	0.0361351	1
TIE1	ENSG00000066056	protein_coding	0	0	-2.28029	NA	0	0	-4.06527	NA	0	0	-5.07497	NA	0
DIP2B	ENSG00000066084	protein_coding	0	0	0.084604	0.710181	0	0	0.60042	0.0226604	1	0	0.760977	0.000450925	1
SMARCD1	ENSG00000066117	protein_coding	0	0	0.733839	5.06711e-07	1	0	0.29996	0.248957	0	0	0.219036	0.287454	0
KDM4A	ENSG00000066135	protein_coding	0	0	-0.349185	0.00808836	0	1	0.706214	0.00130796	1	0	0.879256	3.65999e-06	1
NFYC	ENSG00000066136	protein_coding	0	0	-0.107594	0.676362	0	0	-0.285514	0.379222	0	0	-0.141378	0.604569	0
ZMYND12	ENSG00000066185	protein_coding	0	0	-0.861234	NA	0	0	-0.134294	NA	0	0	-0.904262	NA	0
SLC9A3	ENSG00000066230	protein_coding	0	0	-0.839461	NA	0	0	-3.48103	NA	0	0	-2.02904	NA	0
NGEF	ENSG00000066248	protein_coding	0	0	0.208438	0.800541	0	0	0.0696577	0.95938	0	0	1.12922	0.223507	0
ASPM	ENSG00000066279	protein_coding	0	0	0.36543	0.000951421	1	0	0.187642	0.357998	0	0	0.564155	3.04975e-05	1
CD84	ENSG00000066294	protein_coding	0	0	NA	NA	0	0	NA	NA	0	0	-3.33993	NA	0
ELOVL1	ENSG00000066322	protein_coding	0	0	-0.100192	0.779604	0	0	-0.807834	0.00788392	0	1	-1.94617	1.00576e-30	0
SPI1	ENSG00000066336	protein_coding	0	0	-2.28029	NA	0	0	-3.60239	NA	0	0	NA	NA	0
ZNRD1	ENSG00000066379	protein_coding	0	0	-2.28029	NA	0	0	NA	NA	0	0	NA	NA	0
MPPED2	ENSG00000066382	protein_coding	0	0	0.843235	0.436882	0	0	-0.302229	0.853064	0	0	-0.536034	0.597962	0
CLDN18	ENSG00000066405	protein_coding	0	0	1.9587	NA	0	0	-1.53085	0.543114	0	0	-1.39609	0.578095	0
ZBTB11	ENSG00000066422	protein_coding	0	0	0.218698	0.336264	0	0	0.579078	0.0758399	0	0	0.792901	0.00177707	1
ATXN3	ENSG00000066427	protein_coding	0	0	0.120444	0.812739	0	0	0.074812	0.927216	0	0	-0.328357	0.444447	0
GOLGA5	ENSG00000066455	protein_coding	0	0	-0.00874785	0.982044	0	0	0.352478	0.42206	0	0	0.737183	0.0175082	1
FGFR2	ENSG00000066468	protein_coding	1	0	0.593214	0.0391036	1	0	1.02032	0.0229939	1	0	1.10008	0.00234183	1
LRRC40	ENSG00000066557	protein_coding	0	0	-0.230446	0.428957	0	0	0.540794	0.236152	0	0	0.440956	0.234647	0
ISOC1	ENSG00000066583	protein_coding	0	0	0.32268	0.256971	0	0	0.500895	0.251934	0	0	0.416759	0.205613	0
EML1	ENSG00000066629	protein_coding	0	0	-0.550689	0.328879	0	0	0.167616	0.897243	0	0	0.978878	0.288915	0
TRMT11	ENSG00000066651	protein_coding	0	0	-0.561047	0.116724	0	0	-0.183367	0.821297	0	0	-0.404054	0.387252	0
THUMPD1	ENSG00000066654	protein_coding	1	0	0.795129	6.29346e-06	1	0	1.41708	4.05267e-08	1	0	1.58553	1.96548e-11	1
MSANTD3	ENSG00000066697	protein_coding	0	0	0.0692532	0.775968	0	0	0.395637	0.170861	0	0	0.611047	0.00464529	1
KIF26A	ENSG00000066735	protein_coding	0	0	0.860625	0.0179065	1	0	-0.000945886	0.999087	0	0	0.0115805	0.981636	0
ATG2B	ENSG00000066739	protein_coding	0	0	-0.886361	0.000469696	0	1	0.226627	0.782221	0	0	0.175295	0.739811	0
ARFGEF1	ENSG00000066777	protein_coding	0	0	-0.0643168	0.723189	0	0	0.638167	0.00242962	1	0	0.954002	1.70094e-08	1
ACSM2B	ENSG00000066813	protein_coding	0	0	NA	NA	0	0	NA	NA	0	0	NA	NA	0
ZFAT	ENSG00000066827	protein_coding	0	0	-0.0873321	0.873154	0	0	0.160512	0.853559	0	0	-0.0864275	0.882558	0
MTFR1	ENSG00000066855	protein_coding	0	0	0.342174	0.0848827	0	0	1.10027	8.90554e-05	1	0	0.931259	0.000101281	1
STAG3	ENSG00000066923	protein_coding	0	0	0.0319613	0.985781	0	0	-2.19492	0.0174994	0	1	-1.90751	0.0309057	0
FECH	ENSG00000066926	protein_coding	0	0	0.0748045	0.840232	0	0	0.594736	0.167919	0	0	0.878285	0.00895183	1
MYO9A	ENSG00000066933	protein_coding	0	0	-0.130709	0.591783	0	0	0.609646	0.0453903	1	0	0.34637	0.177196	0
DDX3Y	ENSG00000067048	protein_coding	0	0	NA	NA	0	0	NA	NA	0	0	-3.47269	NA	0
PFKP	ENSG00000067057	protein_coding	0	0	-0.0793216	0.778674	0	0	-0.214886	0.558784	0	0	0.192045	0.509011	0
IDI1	ENSG00000067064	protein_coding	0	0	1.51429	3.22469e-05	1	0	1.0077	0.0717407	0	0	1.1371	0.011329	1
SP100	ENSG00000067066	protein_coding	0	0	-0.496975	0.0718373	0	0	0.486645	0.391952	0	0	0.255365	0.571144	0
KLF6	ENSG00000067082	protein_coding	0	0	0.626075	0.00226934	1	0	0.79745	0.0133636	1	0	0.893237	0.0695819	0
PLPP1	ENSG00000067113	protein_coding	0	0	-0.334533	0.593971	0	0	-0.227693	0.835138	0	0	-0.333581	0.643635	0
NEO1	ENSG00000067141	protein_coding	0	0	0.00234192	0.994875	0	0	0.166046	0.689737	0	0	0.119301	0.689422	0
TRAM1	ENSG00000067167	protein_coding	0	0	0.343843	0.000923003	1	0	0.558904	0.000824668	1	0	0.0349784	0.843419	0
PHKA1	ENSG00000067177	protein_coding	0	0	-0.0239869	0.962292	0	0	0.308625	0.621437	0	0	0.935129	0.0316867	1
TNFRSF1A	ENSG00000067182	protein_coding	0	0	-0.148236	0.435695	0	0	0.200246	0.537251	0	0	-0.307068	0.107117	0
CACNB1	ENSG00000067191	protein_coding	0	0	0.0939392	0.899407	0	0	-0.97907	0.0821258	0	0	-1.13807	0.00499837	0
EVI5	ENSG00000067208	protein_coding	0	0	0.00134085	0.997357	0	0	0.808852	0.0280029	1	0	0.616257	0.0346618	1
STOML1	ENSG00000067221	protein_coding	0	0	-0.104305	0.900747	0	0	0.254178	0.838751	0	0	0.177223	0.849929	0
PKM	ENSG00000067225	protein_coding	0	0	-0.16763	0.0498787	0	0	0.253884	0.00494566	0	0	0.280794	0.00124384	0
DHX29	ENSG00000067248	protein_coding	0	0	0.156897	0.427022	0	0	0.773768	0.00178769	1	0	1.08005	1.26582e-07	1
DNTTIP2	ENSG00000067334	protein_coding	1	0	0.749313	5.21654e-09	1	0	0.911475	1.02942e-05	1	0	1.21078	2.00992e-12	1
METTL22	ENSG00000067365	protein_coding	0	0	-0.740878	0.0609918	0	0	-0.507382	0.483272	0	0	-0.694479	0.147932	0
TP53BP1	ENSG00000067369	protein_coding	1	0	0.408361	0.00373452	1	0	0.779441	0.000247903	1	0	0.998746	1.45506e-08	1
TRO	ENSG00000067445	protein_coding	0	0	0.290864	0.140286	0	0	0.0569466	0.892233	0	0	0.130395	0.62218	0
RRP15	ENSG00000067533	protein_coding	0	0	0.491456	0.0908616	0	0	0.717191	0.112509	0	0	0.964823	0.00630146	1
RHOA	ENSG00000067560	protein_coding	0	0	-0.044505	0.726934	0	0	0.237718	0.0750066	0	0	0.201622	0.0801846	0
DHX8	ENSG00000067596	protein_coding	1	0	0.409825	0.00438364	1	0	0.59412	0.00613024	1	0	0.949476	1.93302e-07	1
PMS2P4	ENSG00000067601	transcribed_unprocessed_pseudogene	0	0	-0.637875	0.535478	0	0	-0.140442	0.946365	0	0	0.175194	0.918776	0
PRKCZ	ENSG00000067606	protein_coding	0	0	-0.362556	0.458249	0	0	0.152187	0.879547	0	0	0.526436	0.450991	0
ZFY	ENSG00000067646	protein_coding	0	0	NA	NA	0	0	NA	NA	0	0	NA	NA	0
IARS2	ENSG00000067704	protein_coding	1	0	0.709638	2.41036e-14	1	0	1.45432	8.51007e-23	1	0	1.5015	7.7189e-31	1
SYT1	ENSG00000067715	protein_coding	0	0	-0.19002	0.908559	0	0	-0.913434	0.576375	0	0	-0.4368	0.801228	0
NAV3	ENSG00000067798	protein_coding	0	0	0.688935	0.00103559	1	0	0.49791	0.163148	0	0	0.500512	0.0639047	0
IDH3G	ENSG00000067829	protein_coding	0	0	-0.631896	0.0469396	0	1	-0.74423	0.111572	0	0	-0.678316	0.0661999	0
ROGDI	ENSG00000067836	protein_coding	0	0	-0.397555	0.279916	0	0	-0.300276	0.657701	0	0	-0.182653	0.723431	0
PDZD4	ENSG00000067840	protein_coding	0	0	1.00079	0.000174803	1	0	0.634	0.121734	0	0	0.48783	0.140524	0
ATP2B3	ENSG00000067842	protein_coding	0	0	-0.0592744	0.977029	0	0	-0.699819	0.731073	0	0	-0.247814	0.905889	0
ROCK1	ENSG00000067900	protein_coding	0	0	0.269932	0.029092	0	0	0.960035	1.77038e-07	1	0	1.19897	4.23566e-15	1
CBFB	ENSG00000067955	protein_coding	1	0	0.981663	8.96194e-14	1	0	1.10895	1.76802e-08	1	0	1.01201	2.2237e-09	1
PDK3	ENSG00000067992	protein_coding	0	0	0.522701	0.477109	0	0	0.454767	0.707088	0	0	-0.0463994	0.959207	0
HYAL2	ENSG00000068001	protein_coding	0	0	0.803422	0.00674109	1	0	0.523029	0.297411	0	0	-0.194141	0.796215	0
HDAC4	ENSG00000068024	protein_coding	0	0	-1.09941	0.15863	0	0	-0.0352736	0.985552	0	0	-1.0725	0.269454	0
RASSF1	ENSG00000068028	protein_coding	0	0	0.291021	0.397401	0	0	0.0438126	0.947678	0	0	0.51967	0.176548	0
FGFR3	ENSG00000068078	protein_coding	0	0	2.17629	0.00306	1	0	0.321107	0.779068	0	0	0.439021	0.596504	0
IFI35	ENSG00000068079	protein_coding	0	0	-0.263118	NA	0	0	-0.820749	NA	0	0	-0.442114	NA	0
HEATR6	ENSG00000068097	protein_coding	0	0	-0.242585	0.191715	0	0	0.427426	0.168922	0	0	0.50176	0.0287604	1
COASY	ENSG00000068120	protein_coding	0	0	0.0546073	0.848938	0	0	0.0139605	0.976842	0	0	-0.0650414	0.830633	0
PLEKHH3	ENSG00000068137	protein_coding	0	0	-0.425445	0.112309	0	0	-0.355968	0.450748	0	0	-0.402121	0.197462	0
MEF2A	ENSG00000068305	protein_coding	0	0	-0.115079	0.66818	0	0	0.671718	0.0422306	1	0	0.612389	0.024155	1
OTUD5	ENSG00000068308	protein_coding	0	0	-0.238787	0.227153	0	0	-0.171179	0.647273	0	0	-0.250624	0.284999	0
TFE3	ENSG00000068323	protein_coding	0	0	-0.266561	0.0938446	0	0	-0.513584	0.0148749	0	1	-0.063388	0.800092	0
TBC1D25	ENSG00000068354	protein_coding	0	0	-0.0265333	0.961361	0	0	-0.429045	0.433137	0	0	-0.313002	0.45142	0
ACSL4	ENSG00000068366	protein_coding	0	0	0.287271	0.188849	0	0	1.86767	3.92749e-09	1	0	1.88532	8.88847e-11	1
INPP5A	ENSG00000068383	protein_coding	0	0	0.131029	0.763374	0	0	0.361812	0.548362	0	0	1.1335	0.0102534	1
GPKOW	ENSG00000068394	protein_coding	0	0	0.372628	0.224997	0	0	0.277851	0.589581	0	0	1.17858	0.000871938	1
GRIPAP1	ENSG00000068400	protein_coding	0	0	-0.0360176	0.920189	0	0	0.118075	0.817359	0	0	-0.0544695	0.879437	0
FTSJ1	ENSG00000068438	protein_coding	0	0	-0.452157	0.0109964	0	1	-0.425483	0.167552	0	0	-0.233375	0.645272	0
PRR11	ENSG00000068489	protein_coding	0	0	0.0874183	0.564994	0	0	0.187896	0.350846	0	0	0.382019	0.00509265	1
REEP1	ENSG00000068615	protein_coding	0	0	1.22856	0.150712	0	0	1.14257	0.405909	0	0	1.2288	0.278335	0
ATP11A	ENSG00000068650	protein_coding	0	0	0.108754	0.572909	0	0	0.0700675	0.838842	0	0	-0.127511	0.542213	0
POLR1A	ENSG00000068654	protein_coding	0	0	0.157985	0.226238	0	0	0.461523	0.0091739	1	0	0.5578	5.02261e-05	1
LAPTM4A	ENSG00000068697	protein_coding	0	0	0.174318	0.279916	0	0	0.362252	0.081504	0	0	0.0543778	0.797823	0
TTC7A	ENSG00000068724	protein_coding	0	0	0.510608	0.100429	0	0	-0.232622	0.675353	0	0	-0.0104173	0.980701	0
IP6K2	ENSG00000068745	protein_coding	0	0	-0.00779401	0.980763	0	0	-0.45926	0.0851057	0	0	-0.537153	0.00386351	0
STON1-GTF2A1L	ENSG00000068781	protein_coding	0	0	NA	NA	0	0	NA	NA	0	0	NA	NA	0
SRBD1	ENSG00000068784	protein_coding	1	0	0.586194	0.00152986	1	0	0.810691	0.00399691	1	0	1.37206	5.55154e-08	1
KIF2A	ENSG00000068796	protein_coding	1	0	0.376566	0.00354133	1	0	1.05785	1.85624e-07	1	0	1.40424	1.71217e-16	1
RASGRP2	ENSG00000068831	protein_coding	0	0	1.00611	0.607295	0	0	-0.305556	0.906442	0	0	-1.43596	0.241333	0
PSME4	ENSG00000068878	protein_coding	0	0	0.10667	0.391183	0	0	0.633649	9.93126e-06	1	0	0.519333	1.09701e-05	1
IFT80	ENSG00000068885	protein_coding	0	0	-0.672003	0.279106	0	0	-0.356581	0.778539	0	0	-0.0714728	0.947504	0
SIRT2	ENSG00000068903	protein_coding	0	0	NA	NA	0	0	NA	NA	0	0	NA	NA	0
ERLEC1	ENSG00000068912	protein_coding	1	0	0.8593	3.4109e-10	1	0	1.78792	3.11631e-16	1	0	1.54059	5.33724e-16	1
PPP2R5B	ENSG00000068971	protein_coding	0	0	-0.359998	0.484362	0	0	-0.172245	0.860439	0	0	-0.631119	0.204427	0
PYGM	ENSG00000068976	protein_coding	0	0	-0.843263	NA	0	0	-1.76394	0.361065	0	0	-2.20167	0.117557	0
PAGE1	ENSG00000068985	protein_coding	0	0	1.46855	NA	0	0	0.215849	NA	0	0	2.8273	NA	0
PITX1	ENSG00000069011	protein_coding	0	0	0.122774	0.772962	0	0	0.657826	0.199241	0	0	0.062123	0.89586	0
TRPC7	ENSG00000069018	protein_coding	0	0	-0.856141	NA	0	0	-3.15841	NA	0	0	-4.36474	0.17455	0
MAST4	ENSG00000069020	protein_coding	0	0	-0.83598	0.0061698	0	1	0.0820134	0.926811	0	0	0.221556	0.712483	0
ADGRF5	ENSG00000069122	protein_coding	0	0	0.753087	NA	0	0	2.96191	NA	0	0	-1.76933	0.490261	0
SDK2	ENSG00000069188	protein_coding	0	0	0.213046	0.544046	0	0	-0.551934	0.139155	0	0	0.0127281	0.975911	0
ADAM7	ENSG00000069206	protein_coding	0	0	NA	NA	0	0	NA	NA	0	0	-4.84825	NA	0
NUP133	ENSG00000069248	protein_coding	0	0	0.313709	0.0765788	0	0	0.544049	0.0413272	1	0	0.533248	0.0115536	1
NUCKS1	ENSG00000069275	protein_coding	1	0	0.30607	7.27312e-05	1	0	0.780928	1.15092e-11	1	0	0.81867	4.40891e-20	1
VPS35	ENSG00000069329	protein_coding	0	0	0.252351	0.0408394	0	0	0.766848	2.04909e-05	1	0	0.909138	3.78511e-10	1
DNAJA2	ENSG00000069345	protein_coding	0	0	0.186934	0.585043	0	0	0.914509	1.93435e-06	1	0	0.994612	2.57938e-09	1
BCL3	ENSG00000069399	protein_coding	0	0	0.494109	0.32141	0	0	-0.148127	0.858254	0	0	-0.631814	0.116278	0
KCNAB2	ENSG00000069424	protein_coding	0	0	0.713633	0.0867886	0	0	0.242531	0.757118	0	0	0.17896	0.752274	0
ABCC9	ENSG00000069431	protein_coding	0	0	-0.587904	NA	0	0	1.5416	NA	0	0	-0.353756	NA	0
GAL	ENSG00000069482	protein_coding	0	0	NA	NA	0	0	-2.47761	NA	0	0	NA	NA	0
CLEC2D	ENSG00000069493	protein_coding	0	0	-0.570473	0.603429	0	0	-1.21615	0.309241	0	0	-0.224256	0.889628	0
FUNDC1	ENSG00000069509	protein_coding	0	0	0.84258	0.0192937	1	0	0.333294	0.605802	0	0	0.650475	0.148343	0
MAOB	ENSG00000069535	protein_coding	0	0	0.59414	0.328521	0	0	0.626453	0.524373	0	0	0.164003	0.835877	0
RORA	ENSG00000069667	protein_coding	0	0	-0.792158	0.00742276	0	1	-0.658548	0.189314	0	0	-0.6498	0.0824244	0
DRD4	ENSG00000069696	protein_coding	0	0	-2.28029	NA	0	0	-2.47761	NA	0	0	NA	NA	0
TGFBR3	ENSG00000069702	protein_coding	0	0	1.59891	9.36972e-05	1	0	0.350821	0.63207	0	0	0.31828	0.526295	0
KIAA1107	ENSG00000069712	protein_coding	0	0	NA	NA	0	0	NA	NA	0	0	NA	NA	0
PLA2G10	ENSG00000069764	protein_coding	0	0	NA	NA	0	0	NA	NA	0	0	NA	NA	0
HES2	ENSG00000069812	protein_coding	0	0	-3.27007	NA	0	0	NA	NA	0	0	-4.49154	NA	0
ATP1B3	ENSG00000069849	protein_coding	0	0	0.404301	0.0970617	0	0	0.342382	0.374016	0	0	0.253036	0.397095	0
NEDD4	ENSG00000069869	protein_coding	0	0	-0.194652	0.374905	0	0	0.898044	0.00370703	1	0	1.37399	0.0143657	1
PIGB	ENSG00000069943	protein_coding	0	0	-0.239522	0.825202	0	0	0.157314	0.931251	0	0	-0.0587501	0.964206	0
MAPK6	ENSG00000069956	protein_coding	1	0	0.729464	9.25373e-13	1	0	1.36699	8.06865e-18	1	0	1.53487	2.30632e-26	1
GNB5	ENSG00000069966	protein_coding	0	0	0.319082	0.358415	0	0	0.142502	0.829599	0	0	0.0364825	0.937127	0
RAB27A	ENSG00000069974	protein_coding	0	0	0.454862	0.26945	0	0	1.1052	0.059139	0	0	1.55402	0.00362275	1
CECR5	ENSG00000069998	protein_coding	0	0	0.411776	0.282038	0	0	-0.0460175	0.94994	0	0	-0.0795247	0.867093	0
UFD1L	ENSG00000070010	protein_coding	0	1	-0.573174	0.000315298	0	1	-0.898414	3.36587e-05	0	1	-0.919835	5.65807e-08	0
LRP6	ENSG00000070018	protein_coding	0	0	NA	NA	0	0	NA	NA	0	0	NA	NA	0
GUCY2C	ENSG00000070019	protein_coding	0	0	-3.30014	NA	0	0	-2.47761	NA	0	0	-3.47269	NA	0
SCT	ENSG00000070031	protein_coding	0	0	NA	NA	0	0	NA	NA	0	0	NA	NA	0
PHRF1	ENSG00000070047	protein_coding	0	0	1.15367	0.246076	0	0	0.658053	0.722762	0	0	1.72086	0.229139	0
IKBKAP	ENSG00000070061	protein_coding	1	0	0.700521	6.99673e-08	1	0	1.18393	1.28042e-08	1	0	1.58415	1.19934e-17	1
NUCB2	ENSG00000070081	protein_coding	0	0	-0.287622	0.0659349	0	0	0.295582	0.326032	0	0	0.387373	0.0686699	0
PFN2	ENSG00000070087	protein_coding	0	0	-0.17679	0.156283	0	0	0.335939	0.0808297	0	0	-0.241423	0.0891872	0
PTPN3	ENSG00000070159	protein_coding	0	0	0.246598	0.387257	0	0	0.0587042	0.918617	0	0	0.166164	0.631768	0
SPTB	ENSG00000070182	protein_coding	0	0	0.840147	0.108993	0	0	0.420599	0.248061	0	0	0.647084	0.0167624	1
DAPP1	ENSG00000070190	protein_coding	0	0	0.169326	NA	0	0	-1.1084	NA	0	0	1.50803	NA	0
FGF10	ENSG00000070193	protein_coding	0	0	-4.2852	NA	0	0	-2.47761	NA	0	0	-4.49154	NA	0
SLC44A1	ENSG00000070214	protein_coding	0	0	0.310734	0.0748493	0	0	0.718321	0.00223985	1	0	0.376161	0.0639047	0
TMEM260	ENSG00000070269	protein_coding	0	0	-1.17173	0.00349357	0	1	-0.538084	0.551651	0	0	-0.526634	0.449484	0
SMG6	ENSG00000070366	protein_coding	0	0	0.178646	0.567256	0	0	0.483962	0.247288	0	0	0.926903	0.00312699	1
EXOC5	ENSG00000070367	protein_coding	1	0	0.481667	5.11643e-06	1	0	1.02193	7.63994e-11	1	0	1.12767	7.01449e-17	1
CLTCL1	ENSG00000070371	protein_coding	0	0	-1.29385	1.65937e-16	0	1	0.0793224	0.891574	0	0	-0.0795906	0.838372	0
FGF22	ENSG00000070388	protein_coding	0	0	0.752552	NA	0	0	-1.15035	NA	0	0	-0.307528	NA	0
FSTL3	ENSG00000070404	protein_coding	0	0	-0.310794	0.0229898	0	1	0.011435	0.975375	0	0	0.0106559	0.964407	0
DGCR2	ENSG00000070413	protein_coding	0	0	0.454094	0.017693	1	0	0.806193	0.00346677	1	0	0.311927	0.208875	0
RNF126	ENSG00000070423	protein_coding	0	0	-0.0530939	0.90514	0	0	-0.0185183	0.979707	0	0	-0.274179	0.460162	0
MNT	ENSG00000070444	protein_coding	0	0	0.0263311	0.971287	0	0	-0.241639	0.760745	0	0	-0.722916	0.0829849	0
ZXDC	ENSG00000070476	protein_coding	0	0	-0.360912	0.160933	0	0	-0.419706	0.288123	0	0	-0.0564963	0.890973	0
JMJD6	ENSG00000070495	protein_coding	0	0	0.0971884	0.77978	0	0	-1.12181	4.54424e-06	0	1	-1.25568	3.50768e-11	0
POLB	ENSG00000070501	protein_coding	0	0	-0.277345	0.526699	0	0	0.145035	0.86531	0	0	0.0573925	0.924981	0
ST6GALNAC1	ENSG00000070526	protein_coding	0	0	-1.83176	NA	0	0	-2.58955	NA	0	0	-2.03604	NA	0
WIPI1	ENSG00000070540	protein_coding	0	0	-0.233177	0.686387	0	0	0.611687	0.500955	0	0	0.239789	0.745479	0
FRMPD1	ENSG00000070601	protein_coding	0	0	0.5825	0.877368	0	0	0.0181331	0.994052	0	0	-0.408652	0.848438	0
GBA2	ENSG00000070610	protein_coding	0	0	0.104213	0.699059	0	0	0.0511208	0.912126	0	0	-0.0388438	0.902308	0
NDST1	ENSG00000070614	protein_coding	0	0	0.00841749	0.963245	0	0	-0.124854	0.559663	0	0	-0.212609	0.124856	0
ASNS	ENSG00000070669	protein_coding	0	0	-1.38508	1.23376e-54	0	1	0.370243	0.0509591	0	0	0.0792336	0.661829	0
AP3M2	ENSG00000070718	protein_coding	0	0	-0.506988	0.064333	0	0	0.285304	0.646775	0	0	0.413158	0.342119	0
CNGB1	ENSG00000070729	protein_coding	0	0	1.16428	NA	0	0	0.886144	NA	0	0	1.51137	NA	0
ST6GALNAC2	ENSG00000070731	protein_coding	0	0	-0.168954	NA	0	0	-2.18292	0.217229	0	0	-1.52444	0.477053	0
CHAT	ENSG00000070748	protein_coding	0	0	0.166803	NA	0	0	0.0108991	NA	0	0	-1.03595	NA	0
PABPC1	ENSG00000070756	protein_coding	0	0	0.0052062	0.973359	0	0	0.464245	1.83285e-06	1	0	0.623162	7.58147e-13	1
TESK2	ENSG00000070759	protein_coding	0	0	-0.32491	0.626721	0	0	-0.631696	0.453282	0	0	-0.933782	0.0797657	0
CFAP20	ENSG00000070761	protein_coding	0	0	0.11854	0.742369	0	0	0.186169	0.72572	0	0	0.518129	0.122475	0
CSNK2A2	ENSG00000070770	protein_coding	0	0	0.014914	0.943086	0	0	0.509775	0.00852874	1	0	0.757402	1.00842e-06	1
PTPN21	ENSG00000070778	protein_coding	0	0	-0.108093	0.712146	0	0	0.251254	0.567868	0	0	0.463983	0.120864	0
EIF2B3	ENSG00000070785	protein_coding	0	0	0.487461	0.0804339	0	0	0.394882	0.433582	0	0	0.618163	0.0693854	0
CAMK2A	ENSG00000070808	protein_coding	0	0	0.899618	NA	0	0	2.27867	NA	0	0	0.473639	NA	0
TCOF1	ENSG00000070814	protein_coding	1	0	0.666524	1.46105e-10	1	0	0.792967	2.39285e-07	1	0	1.20184	2.88186e-18	1
CDC42	ENSG00000070831	protein_coding	0	0	0.309394	0.000471166	1	0	0.511574	0.00156519	1	0	0.26423	0.0280078	0
OSBPL3	ENSG00000070882	protein_coding	0	0	-0.195048	0.429869	0	0	-0.0761726	0.876379	0	0	0.206957	0.507602	0
EPHA8	ENSG00000070886	protein_coding	0	0	1.29306	0.451422	0	0	1.39275	0.569883	0	0	0.187672	0.927801	0
SLC12A3	ENSG00000070915	protein_coding	0	0	-2.44303	NA	0	0	0.375627	NA	0	0	-0.493993	NA	0
RAD18	ENSG00000070950	protein_coding	0	0	0.121396	0.678409	0	0	0.281238	0.499043	0	0	-0.0241162	0.94448	0
ATP2B1	ENSG00000070961	protein_coding	0	0	0.0730101	0.707834	0	0	1.39934	1.098e-09	1	0	1.47223	1.24564e-14	1
TRPM5	ENSG00000070985	protein_coding	0	0	-3.28518	NA	0	0	-2.58625	NA	0	0	-4.9292	NA	0
NCK2	ENSG00000071051	protein_coding	0	0	0.0812729	0.726934	0	0	0.441728	0.122901	0	0	0.59474	0.00447752	1
MAP4K4	ENSG00000071054	protein_coding	0	0	0.0314104	0.826816	0	0	0.3325	0.0467532	1	0	0.547327	1.29698e-06	1
MGAT4A	ENSG00000071073	protein_coding	0	0	-0.529828	0.545193	0	0	0.879148	0.325036	0	0	0.66374	0.35318	0
RPL31	ENSG00000071082	protein_coding	0	0	-0.189096	0.119331	0	0	-1.08584	2.38272e-17	0	1	-0.392186	0.0017075	0
WDR1	ENSG00000071127	protein_coding	0	0	-0.137982	0.324737	0	0	-0.0387304	0.889127	0	0	0.158745	0.339609	0
SNX13	ENSG00000071189	protein_coding	0	0	0.188014	0.346709	0	0	0.66486	0.0104952	1	0	0.572203	0.00739143	1
MS4A12	ENSG00000071203	protein_coding	0	0	-2.29695	NA	0	0	NA	NA	0	0	NA	NA	0
ARHGAP10	ENSG00000071205	protein_coding	0	0	-0.117808	0.763205	0	0	0.0795673	0.906442	0	0	0.0718165	0.879008	0
RPS6KA2	ENSG00000071242	protein_coding	0	0	-1.3881	2.17497e-06	0	1	0.376694	0.701613	0	0	-0.227818	0.724203	0
ING3	ENSG00000071243	protein_coding	0	0	0.248873	0.607983	0	0	0.588163	0.412031	0	0	0.920213	0.0944565	0
VASH1	ENSG00000071246	protein_coding	0	0	0.913994	0.00609758	1	0	0.311165	0.62155	0	0	-0.202075	0.634318	0
LMCD1	ENSG00000071282	protein_coding	0	0	-0.762577	7.54967e-06	0	1	-0.294213	0.449525	0	0	-0.33425	0.210638	0
WBSCR22	ENSG00000071462	protein_coding	0	0	0.253603	0.14441	0	0	0.242129	0.409159	0	0	0.00238138	0.991964	0
SEL1L	ENSG00000071537	protein_coding	0	0	0.110122	0.469095	0	0	1.15272	5.40968e-11	1	0	1.47956	1.27001e-19	1
TRIP13	ENSG00000071539	protein_coding	0	0	0.412153	0.0295798	1	0	0.431753	0.150082	0	0	0.612393	0.00739143	1
ATP6AP1	ENSG00000071553	protein_coding	0	0	-0.382726	0.0329849	0	1	-0.378238	0.215164	0	0	-0.731857	9.06723e-05	0
TCF3	ENSG00000071564	protein_coding	0	0	0.613169	3.75515e-07	1	0	0.187767	0.506775	0	0	0.45887	0.00331653	1
TRIB2	ENSG00000071575	protein_coding	1	0	1.32801	5.83361e-30	1	0	0.806814	3.58355e-06	1	0	0.906717	1.80501e-10	1
DAZAP1	ENSG00000071626	protein_coding	0	0	-0.08432	0.696137	0	0	-0.112156	0.761356	0	0	0.00223861	0.99294	0
MBD3	ENSG00000071655	protein_coding	0	0	0.15824	0.609201	0	0	0.0613105	0.915938	0	0	-0.0427314	0.909647	0
PRLH	ENSG00000071677	protein_coding	0	0	NA	NA	0	0	-2.47761	NA	0	0	NA	NA	0
HLTF	ENSG00000071794	protein_coding	1	0	0.455854	0.00268854	1	0	1.15182	3.86961e-06	1	0	1.59589	2.32342e-14	1
FAM50A	ENSG00000071859	protein_coding	0	0	-0.282609	0.232442	0	0	-0.505418	0.10689	0	0	0.324648	0.338844	0
FAM3A	ENSG00000071889	protein_coding	0	0	-0.610646	0.0878892	0	0	-0.228874	0.781885	0	0	-0.268124	0.617153	0
CPSF1	ENSG00000071894	protein_coding	0	0	-0.16167	0.241988	0	0	-0.188958	0.389437	0	0	-0.233168	0.128053	0
MYO3B	ENSG00000071909	protein_coding	0	0	0.598342	NA	0	0	-2.97517	NA	0	0	-4.2813	0.160996	0
CYBRD1	ENSG00000071967	protein_coding	0	0	0.423173	0.208567	0	0	0.103786	0.876069	0	0	0.489762	0.219552	0
CDH19	ENSG00000071991	protein_coding	0	0	NA	NA	0	0	NA	NA	0	0	NA	NA	0
PDCD2	ENSG00000071994	protein_coding	0	0	0.150914	0.456679	0	0	0.675701	0.00784064	1	0	0.6968	0.000573652	1
SLC6A15	ENSG00000072041	protein_coding	0	0	-0.0678211	0.911902	0	0	1.151	0.114357	0	0	0.444945	0.471699	0
RDH11	ENSG00000072042	protein_coding	1	0	0.332819	0.0245129	1	0	0.726666	0.000754457	1	0	0.642421	0.000279338	1
PRKACA	ENSG00000072062	protein_coding	0	0	-0.0786422	0.824553	0	0	-0.16764	0.735083	0	0	-0.286358	0.343563	0
ADGRL1	ENSG00000072071	protein_coding	0	0	-0.0458495	0.871366	0	0	-0.332989	0.221717	0	0	-0.47635	0.00980529	0
SPP2	ENSG00000072080	protein_coding	0	0	NA	NA	0	0	NA	NA	0	0	NA	NA	0
ACTN1	ENSG00000072110	protein_coding	0	0	0.277233	0.00087126	0	0	-0.159985	0.275619	0	0	0.163814	0.193536	0
ZFYVE26	ENSG00000072121	protein_coding	0	0	-0.0587339	0.81502	0	0	-0.141717	0.690769	0	0	0.2619	0.279467	0
RPS6KA6	ENSG00000072133	protein_coding	0	0	0.36919	0.342097	0	0	1.50606	0.0040241	1	0	0.868507	0.0507896	0
EPN2	ENSG00000072134	protein_coding	0	0	0.342308	0.220841	0	0	0.500429	0.240542	0	0	0.259254	0.457242	0
PTPN18	ENSG00000072135	protein_coding	0	0	-0.205449	0.427768	0	0	-0.019586	0.971923	0	0	-0.401159	0.126579	0
LIMS2	ENSG00000072163	protein_coding	0	0	-0.128902	0.825882	0	0	-0.758657	0.169682	0	0	-1.49852	5.14043e-07	0
ASIC4	ENSG00000072182	protein_coding	0	0	-0.844054	NA	0	0	-2.77303	0.217038	0	0	-3.13579	0.0876607	0
SPEG	ENSG00000072195	protein_coding	0	0	-0.00660938	0.983623	0	0	-0.547924	0.0546259	0	0	-0.430687	0.0347031	0
LNX1	ENSG00000072201	protein_coding	0	0	-0.30994	0.6831	0	0	0.652282	0.617883	0	0	0.339414	0.87662	0
ALDH3A2	ENSG00000072210	protein_coding	1	0	1.13364	3.02923e-08	1	0	0.776186	0.0103625	1	0	0.652293	0.00970615	1
TFRC	ENSG00000072274	protein_coding	1	0	1.25208	7.76324e-42	1	0	0.866396	5.43456e-12	1	0	0.978464	6.7678e-16	1
SREBF1	ENSG00000072310	protein_coding	0	0	-0.153874	0.431551	0	0	-0.447199	0.0666313	0	0	-0.558051	0.000194762	0
TRPC5	ENSG00000072315	protein_coding	0	0	-0.275877	NA	0	0	-0.569617	NA	0	0	-1.25013	NA	0
AFF4	ENSG00000072364	protein_coding	0	0	-0.1411	0.274182	0	0	0.509147	0.00118533	1	0	0.606866	3.02498e-06	1
UBE2D1	ENSG00000072401	protein_coding	0	0	0.188119	0.617665	0	0	0.0938258	0.888218	0	0	0.355087	0.372352	0
MPP5	ENSG00000072415	protein_coding	1	0	0.956285	8.33724e-25	1	0	0.987696	6.01112e-12	1	0	1.36515	2.06509e-32	1
RHOBTB1	ENSG00000072422	protein_coding	1	0	0.546008	7.41289e-05	1	0	0.809739	9.06673e-05	1	0	0.973205	9.81145e-08	1
SMC1A	ENSG00000072501	protein_coding	1	0	0.390756	4.89788e-05	1	0	0.75216	4.17184e-08	1	0	1.25782	8.10127e-24	1
HSD17B10	ENSG00000072506	protein_coding	0	0	-0.0200561	0.957838	0	0	-0.252253	0.542221	0	0	-0.0457861	0.902275	0
MARK2	ENSG00000072518	protein_coding	0	0	0.128226	0.631707	0	0	0.410598	0.251956	0	0	0.248805	0.37512	0
HMMR	ENSG00000072571	protein_coding	0	0	0.343281	0.0830106	0	0	0.717571	0.0237348	1	0	0.80655	0.000391168	1
CHFR	ENSG00000072609	protein_coding	0	0	-0.422734	0.456581	0	0	0.32404	0.781511	0	0	0.192163	0.823489	0
TRHDE	ENSG00000072657	protein_coding	0	0	-0.17393	0.87903	0	0	1.03736	0.525896	0	0	0.357541	0.800326	0
P4HA2	ENSG00000072682	protein_coding	1	0	0.68074	6.32848e-05	1	0	0.567681	0.0374714	1	0	0.616987	0.00418023	1
FCGR2B	ENSG00000072694	protein_coding	0	0	NA	NA	0	0	NA	NA	0	0	-3.47269	NA	0
NFATC3	ENSG00000072736	protein_coding	0	0	0.094602	0.797687	0	0	-0.292364	0.51476	0	0	-0.454292	0.105637	0
TRNT1	ENSG00000072756	protein_coding	0	0	-0.265816	0.400688	0	0	0.114389	0.861101	0	0	0.381151	0.36079	0
ACADVL	ENSG00000072778	protein_coding	0	0	-0.28143	0.112992	0	0	-0.508392	0.0277443	0	1	-0.306822	0.151657	0
STK10	ENSG00000072786	protein_coding	0	0	0.494128	0.0282726	1	0	0.269166	0.534512	0	0	0.387138	0.175905	0
FBXW11	ENSG00000072803	protein_coding	1	0	0.402477	0.00462369	1	0	1.22491	1.99715e-09	1	0	1.04553	1.85267e-09	1
ACAP1	ENSG00000072818	protein_coding	0	0	-1.11108	0.118724	0	0	-2.21046	0.00100094	0	1	-2.34988	1.43555e-05	0
CRMP1	ENSG00000072832	protein_coding	0	0	-0.00183422	0.996129	0	0	0.192389	0.605208	0	0	0.14706	0.589463	0
EVC	ENSG00000072840	protein_coding	0	0	-0.305306	0.578517	0	0	-0.689374	0.306958	0	0	-0.533248	0.322977	0
DERL2	ENSG00000072849	protein_coding	0	0	0.0625267	0.899357	0	0	-0.279035	0.633726	0	0	-0.136888	0.769843	0
SIDT1	ENSG00000072858	protein_coding	0	0	2.18316	NA	0	0	1.96051	NA	0	0	-1.97154	NA	0
NDE1	ENSG00000072864	protein_coding	0	0	-2.28029	NA	0	0	NA	NA	0	0	NA	NA	0
MRVI1	ENSG00000072952	protein_coding	0	0	0.570479	NA	0	0	-0.959558	0.778962	0	0	-0.425524	0.907014	0
TMEM38A	ENSG00000072954	protein_coding	0	0	0.685987	0.231446	0	0	0.507038	0.58893	0	0	0.0900946	0.906996	0
AP1M1	ENSG00000072958	protein_coding	0	0	-0.0743459	0.837314	0	0	-0.572891	0.0880864	0	0	-0.675286	0.00327951	0
PVR	ENSG00000073008	protein_coding	0	0	-0.371103	0.253895	0	0	-0.00970704	0.983061	0	0	0.11826	0.701168	0
XRCC1	ENSG00000073050	protein_coding	0	0	-0.047169	0.913078	0	0	0.0576982	0.932018	0	0	0.842108	0.0293235	1
SCARB1	ENSG00000073060	protein_coding	0	0	0.738919	0.00229025	1	0	-0.61165	0.048598	0	1	-0.594236	0.0104191	0
CYP2W1	ENSG00000073067	protein_coding	0	0	0.604634	NA	0	0	-3.37091	NA	0	0	-3.62491	NA	0
MCM2	ENSG00000073111	protein_coding	1	0	0.73908	1.24991e-14	1	0	0.701917	6.46067e-07	1	0	0.620794	4.04828e-07	1
MOV10L1	ENSG00000073146	protein_coding	0	0	-1.42568	0.0703997	0	0	-0.59356	0.75648	0	0	-0.9347	0.45315	0
PANX2	ENSG00000073150	protein_coding	0	0	0.155213	0.828529	0	0	-0.304073	0.740075	0	0	0.104868	0.893331	0
SELENOO	ENSG00000073169	protein_coding	0	0	-0.0820359	0.887247	0	0	-0.475808	0.451062	0	0	-0.213329	0.707694	0
TP63	ENSG00000073282	protein_coding	0	0	-1.57834	NA	0	0	-0.4012	NA	0	0	1.09081	NA	0
ALPK1	ENSG00000073331	protein_coding	0	0	-0.418396	0.230467	0	0	0.986823	0.109302	0	0	0.488104	0.336002	0
LLGL2	ENSG00000073350	protein_coding	0	0	-0.113614	0.961872	0	0	0.838178	0.792376	0	0	0.303695	0.917614	0
PDE8A	ENSG00000073417	protein_coding	0	0	-0.174669	0.503945	0	0	0.130174	0.794626	0	0	0.79846	0.0073305	1
CLCN4	ENSG00000073464	protein_coding	0	0	0.203644	0.626184	0	0	0.677591	0.204715	0	0	0.705373	0.101927	0
NLE1	ENSG00000073536	protein_coding	0	0	-0.366483	0.215523	0	0	-0.0389308	0.954463	0	0	0.396619	0.346447	0
SDHA	ENSG00000073578	protein_coding	0	0	0.233555	0.130166	0	0	0.55583	0.00922329	1	0	0.548941	0.00187962	1
SMARCE1	ENSG00000073584	protein_coding	0	0	0.111277	0.771018	0	0	0.181902	0.756075	0	0	0.105628	0.803595	0
FNDC8	ENSG00000073598	protein_coding	0	0	0.167818	NA	0	0	-1.67826	NA	0	0	0.514414	NA	0
GSDMB	ENSG00000073605	protein_coding	0	0	-0.842317	0.297947	0	0	-1.96267	0.00769379	0	1	-1.68877	0.0165736	0
KDM5A	ENSG00000073614	protein_coding	1	0	0.664292	8.09324e-10	1	0	0.861165	1.23107e-07	1	0	0.881745	3.12203e-10	1
ADAM11	ENSG00000073670	protein_coding	0	0	-0.0743097	0.950709	0	0	-0.222951	0.885927	0	0	-1.01557	0.157934	0
PPP2R3A	ENSG00000073711	protein_coding	0	0	0.0313123	0.943339	0	0	0.627223	0.187235	0	0	0.729851	0.0532899	0
FERMT2	ENSG00000073712	protein_coding	0	0	0.0123423	0.949273	0	0	0.649502	5.39593e-05	1	0	0.634053	3.41554e-06	1
ABCB11	ENSG00000073734	protein_coding	0	0	NA	NA	0	0	NA	NA	0	0	-3.47269	NA	0
DHRS9	ENSG00000073737	protein_coding	0	0	NA	NA	0	0	NA	NA	0	0	NA	NA	0
CD5L	ENSG00000073754	protein_coding	0	0	NA	NA	0	0	NA	NA	0	0	NA	NA	0
PTGS2	ENSG00000073756	protein_coding	0	0	-1.98881	1.06839e-06	0	1	-1.05622	0.238646	0	0	-0.922059	0.248713	0
IGF2BP2	ENSG00000073792	protein_coding	0	0	-0.343122	0.0171956	0	1	-0.200358	0.473027	0	0	-0.120831	0.58498	0
MAP3K13	ENSG00000073803	protein_coding	0	0	-0.644306	0.0138379	0	1	-0.191486	0.766879	0	0	-0.0900232	0.859014	0
ST6GAL1	ENSG00000073849	protein_coding	0	0	0.155294	0.885864	0	0	-0.187112	0.902378	0	0	-0.270764	0.79453	0
TBX21	ENSG00000073861	protein_coding	0	0	-3.30014	NA	0	0	-2.47761	NA	0	0	-4.26197	NA	0
VDAC1P1	ENSG00000073905	processed_pseudogene	0	0	-0.259865	0.768296	0	0	0.602582	0.673039	0	0	1.15789	0.320473	0
FRY	ENSG00000073910	protein_coding	0	0	-0.193368	0.785928	0	0	0.610845	0.58607	0	0	0.410293	0.630258	0
PICALM	ENSG00000073921	protein_coding	0	0	-0.246975	0.063796	0	0	0.122717	0.663129	0	0	0.239484	0.202752	0
NSF	ENSG00000073969	protein_coding	0	0	4.75937	0.235066	0	0	2.97854	0.163641	0	0	1.36934	0.666581	0
GLI2	ENSG00000074047	protein_coding	0	0	0.713498	8.25324e-06	1	0	-0.0270012	0.94736	0	0	0.515694	0.0138156	1
CLASP1	ENSG00000074054	protein_coding	0	0	-0.0488285	0.790079	0	0	0.0642504	0.824199	0	0	0.263636	0.110251	0
MRPS34	ENSG00000074071	protein_coding	0	0	0.526295	0.00791287	1	0	0.255938	0.482206	0	0	0.935993	0.000136113	1
NOTCH3	ENSG00000074181	protein_coding	0	0	0.406497	0.0292984	1	0	-0.635755	0.00506276	0	1	-0.699531	3.80329e-05	0
CLNS1A	ENSG00000074201	protein_coding	1	0	0.466209	0.000228539	1	0	0.888442	1.22779e-05	1	0	1.14534	4.27891e-11	1
PPP2R2C	ENSG00000074211	protein_coding	1	0	0.599899	0.000211992	1	0	0.646937	0.0122606	1	0	0.75135	0.000377546	1
TEAD2	ENSG00000074219	protein_coding	0	0	-0.00649641	0.986285	0	0	0.239045	0.623844	0	0	-0.211554	0.522608	0
EED	ENSG00000074266	protein_coding	0	0	0.425832	0.0870199	0	0	0.30031	0.487569	0	0	0.13333	0.708608	0
CDHR2	ENSG00000074276	protein_coding	0	0	1.74597	NA	0	0	-1.90294	0.412572	0	0	-1.69221	0.480661	0
SNCB	ENSG00000074317	protein_coding	0	0	0.965114	0.579931	0	0	0.325301	0.900422	0	0	-0.178718	0.929461	0
TSG101	ENSG00000074319	protein_coding	0	0	-0.533361	0.0261521	0	1	0.306661	0.580906	0	0	0.152967	0.706439	0
NCBP3	ENSG00000074356	protein_coding	0	0	0.0477139	0.865184	0	0	0.626061	0.0377067	1	0	0.739257	0.00199803	1
ATP2A3	ENSG00000074370	protein_coding	0	0	0.15659	0.869967	0	0	-0.380077	0.746094	0	0	-0.162374	0.867093	0
CA12	ENSG00000074410	protein_coding	0	0	2.03621	1.717e-09	1	0	0.662382	0.185679	0	0	0.368775	0.338768	0
MGLL	ENSG00000074416	protein_coding	0	0	0.273533	0.433194	0	0	0.328475	0.549892	0	0	0.336472	0.401017	0
NTN4	ENSG00000074527	protein_coding	1	0	0.846918	0.0069624	1	0	1.38688	0.00365158	1	0	1.03948	0.00901106	1
BCS1L	ENSG00000074582	protein_coding	0	0	-0.205236	0.643688	0	0	-0.29389	0.65419	0	0	-0.23581	0.614047	0
NUAK1	ENSG00000074590	protein_coding	1	0	0.397232	0.00131526	1	0	0.895913	5.0836e-07	1	0	0.871172	1.16983e-08	1
DPP8	ENSG00000074603	protein_coding	0	0	0.117976	0.623579	0	0	0.654643	0.0246994	1	0	0.437535	0.0662906	0
SLC24A1	ENSG00000074621	protein_coding	0	0	-0.776997	0.0322546	0	1	-0.332625	0.680179	0	0	-0.768996	0.0763732	0
ZNF532	ENSG00000074657	protein_coding	0	0	0.0585861	0.742369	0	0	0.172955	0.498601	0	0	0.639831	4.0155e-05	1
SCARF1	ENSG00000074660	protein_coding	0	0	NA	NA	0	0	NA	NA	0	0	NA	NA	0
LMAN1	ENSG00000074695	protein_coding	1	0	0.497606	7.49925e-06	1	0	0.906783	3.84575e-08	1	0	1.14579	3.07348e-17	1
HACD3	ENSG00000074696	protein_coding	0	0	0.447129	4.05679e-05	1	0	0.333485	0.0793349	0	0	0.316353	0.0309216	1
IPCEF1	ENSG00000074706	protein_coding	0	0	-3.27007	NA	0	0	NA	NA	0	0	-4.26197	NA	0
ZZEF1	ENSG00000074755	protein_coding	0	0	-0.156027	0.595377	0	0	0.261158	0.568516	0	0	0.151538	0.669363	0
NOX3	ENSG00000074771	protein_coding	0	0	NA	NA	0	0	NA	NA	0	0	NA	NA	0
ENO1	ENSG00000074800	protein_coding	0	0	-0.137746	0.113356	0	0	-0.220914	0.0218631	0	0	-0.130474	0.232603	0
SLC12A1	ENSG00000074803	protein_coding	0	0	NA	NA	0	0	NA	NA	0	0	NA	NA	0
MYDGF	ENSG00000074842	protein_coding	0	0	0.348141	0.12459	0	0	0.116554	0.800009	0	0	0.373586	0.170846	0
ANO8	ENSG00000074855	protein_coding	0	0	-0.220567	0.736523	0	0	-0.644642	0.4066	0	0	-0.981004	0.0365128	0
TUBE1	ENSG00000074935	protein_coding	0	0	-1.63525	4.1453e-07	0	1	-0.418184	0.673592	0	0	-0.288127	0.698786	0
ARHGEF10L	ENSG00000074964	protein_coding	0	0	0.149818	0.689248	0	0	0.211679	0.717226	0	0	0.194564	0.63272	0
TXK	ENSG00000074966	protein_coding	0	0	-2.28029	NA	0	0	NA	NA	0	0	NA	NA	0
WSCD2	ENSG00000075035	protein_coding	0	0	1.7497	NA	0	0	1.54591	NA	0	0	2.09747	NA	0
KCNQ2	ENSG00000075043	protein_coding	0	0	1.7478	NA	0	0	-1.03895	NA	0	0	-0.836056	NA	0
TACR2	ENSG00000075073	protein_coding	0	0	-0.84251	NA	0	0	-0.568103	NA	0	0	-1.49012	NA	0
ACTR6	ENSG00000075089	protein_coding	0	0	0.524405	0.210171	0	0	0.900055	0.144416	0	0	1.18202	0.0239352	1
TIPIN	ENSG00000075131	protein_coding	1	0	1.24254	1.08796e-06	1	0	0.970773	0.0102918	1	0	1.27122	0.000150989	1
SRI	ENSG00000075142	protein_coding	0	0	-0.0577613	0.871173	0	0	-0.479791	0.195135	0	0	-0.264679	0.373523	0
EIF4G3	ENSG00000075151	protein_coding	0	0	-0.274532	0.0949279	0	0	0.135878	0.699524	0	0	0.459933	0.0298674	1
NUP37	ENSG00000075188	protein_coding	0	0	0.127388	0.820615	0	0	0.270185	0.731849	0	0	0.435315	0.420223	0
SEMA3A	ENSG00000075213	protein_coding	0	0	2.05385	5.0762e-06	1	0	-0.0274306	0.975153	0	0	0.161561	0.772891	0
GTSE1	ENSG00000075218	protein_coding	0	0	0.590715	3.09892e-06	1	0	0.201567	0.399034	0	0	0.468747	0.00321644	1
SEMA3C	ENSG00000075223	protein_coding	0	0	0.180354	0.217496	0	0	0.543453	0.00487063	1	0	0.521603	0.00101811	1
TTC38	ENSG00000075234	protein_coding	0	0	0.330392	0.489853	0	0	-0.318403	0.635417	0	0	-0.649919	0.0916263	0
ACAT1	ENSG00000075239	protein_coding	0	0	0.624665	0.00502355	1	0	0.663254	0.0679171	0	0	0.576126	0.0404433	1
GRAMD4	ENSG00000075240	protein_coding	0	0	0.0565477	0.911902	0	0	0.453222	0.463518	0	0	0.746475	0.0993291	0
CELSR1	ENSG00000075275	protein_coding	0	0	0.859101	NA	0	0	-1.36677	0.450519	0	0	-1.2135	0.478257	0
WNT8B	ENSG00000075290	protein_coding	0	0	-2.28029	NA	0	0	-3.51116	NA	0	0	-5.72385	0.0609714	0
ZNF638	ENSG00000075292	protein_coding	0	0	0.108339	0.367556	0	0	0.679853	6.91543e-06	1	0	1.10322	6.43688e-19	1
SLC25A40	ENSG00000075303	protein_coding	0	0	0.5468	0.0501005	0	0	0.569342	0.196339	0	0	0.218898	0.560995	0
TIMM21	ENSG00000075336	protein_coding	1	0	1.42079	6.3227e-10	1	0	0.784371	0.0228538	1	0	1.27861	7.52871e-06	1
ADD2	ENSG00000075340	protein_coding	0	0	0.0596304	0.872664	0	0	-0.00750771	0.989059	0	0	-0.0582407	0.881576	0
FGF4	ENSG00000075388	protein_coding	0	0	3.40508	NA	0	0	0.738871	NA	0	0	0.900534	NA	0
RASAL2	ENSG00000075391	protein_coding	0	0	-0.0254163	0.921254	0	0	0.465025	0.0765357	0	0	0.492547	0.0169327	1
VPS9D1	ENSG00000075399	protein_coding	0	0	0.0815168	0.914614	0	0	-0.445224	0.632056	0	0	-0.706741	0.166997	0
ZNF37A	ENSG00000075407	protein_coding	0	0	-0.504111	0.025055	0	1	0.37101	0.449674	0	0	0.678111	0.0522956	0
MARK3	ENSG00000075413	protein_coding	0	0	-0.217969	0.291196	0	0	0.304135	0.386939	0	0	0.235228	0.404272	0
SLC25A3	ENSG00000075415	protein_coding	0	0	0.0313141	0.845167	0	0	-0.0552325	0.815907	0	0	-0.0244438	0.890963	0
FNDC3B	ENSG00000075420	protein_coding	0	0	-0.0753587	0.686003	0	0	0.234548	0.359379	0	0	0.332936	0.064825	0
FOSL2	ENSG00000075426	protein_coding	0	0	-0.141442	0.201953	0	0	0.290228	0.0959966	0	0	0.00534836	0.975862	0
CACNG5	ENSG00000075429	protein_coding	0	0	1.59447	NA	0	0	1.37283	NA	0	0	0.501674	NA	0
CACNG4	ENSG00000075461	protein_coding	0	0	-3.27007	NA	0	0	NA	NA	0	0	-4.49154	NA	0
FRYL	ENSG00000075539	protein_coding	0	0	-0.0630198	0.712735	0	0	0.355628	0.0632465	0	0	0.457575	0.00202093	1
TMEM131	ENSG00000075568	protein_coding	0	0	-0.485699	0.000419667	0	1	-0.203019	0.497509	0	0	0.0135353	0.962014	0
FSCN1	ENSG00000075618	protein_coding	0	0	0.811273	2.73049e-23	1	0	-0.146109	0.452382	0	0	-0.545996	1.29751e-08	0
ACTB	ENSG00000075624	protein_coding	0	0	0.129616	0.275277	0	0	-0.314973	4.92e-05	0	1	0.0268	0.849845	0
MOCOS	ENSG00000075643	protein_coding	0	0	-1.56616	1.51821e-13	0	1	0.206815	0.79106	0	0	-0.172375	0.733496	0
PLD1	ENSG00000075651	protein_coding	0	0	-0.814221	5.92826e-06	0	1	0.24056	0.643415	0	0	0.586702	0.0688517	0
ATP12A	ENSG00000075673	protein_coding	0	0	-1.8244	NA	0	0	0.380163	NA	0	0	-3.62491	NA	0
WDR62	ENSG00000075702	protein_coding	0	0	-0.0390888	0.903525	0	0	-0.54432	0.0478907	0	1	-0.502812	0.019818	0
DLG1	ENSG00000075711	protein_coding	0	0	-0.174926	0.226055	0	0	0.493158	0.016133	1	0	0.661974	0.000101583	1
RAB7A	ENSG00000075785	protein_coding	1	0	0.33566	0.00608431	1	0	0.698815	7.06675e-05	1	0	0.666131	7.72234e-06	1
BCAP29	ENSG00000075790	protein_coding	0	0	0.697621	0.0509096	0	0	0.803701	0.00682512	1	0	0.745752	0.00164693	1
SEC31B	ENSG00000075826	protein_coding	0	0	-1.85265	0.159295	0	0	-1.99084	0.221061	0	0	-2.3718	0.0633744	0
SART3	ENSG00000075856	protein_coding	1	0	0.484825	0.00611669	1	0	0.660567	0.0107213	1	0	0.904335	2.23759e-05	1
ARHGAP15	ENSG00000075884	protein_coding	0	0	-0.839461	NA	0	0	0.375627	NA	0	0	-0.493993	NA	0
TUBA3D	ENSG00000075886	protein_coding	0	0	0.276605	NA	0	0	-1.35673	0.452501	0	0	-1.07852	0.557824	0
PAX2	ENSG00000075891	protein_coding	0	0	-0.25673	0.874317	0	0	-0.768255	0.675353	0	0	-1.26274	0.283422	0
EXOSC7	ENSG00000075914	protein_coding	0	0	0.559741	0.147538	0	0	0.185088	0.803097	0	0	0.971612	0.0437291	1
KIFAP3	ENSG00000075945	protein_coding	0	0	0.437944	0.183312	0	0	1.41792	0.00236108	1	0	1.45838	0.000435156	1
MKRN2	ENSG00000075975	protein_coding	0	0	-0.273654	0.2094	0	0	0.486827	0.189746	0	0	0.537744	0.0565679	0
MCM6	ENSG00000076003	protein_coding	1	0	0.885305	2.9848e-16	1	0	1.24997	5.64894e-15	1	0	1.42061	7.08615e-22	1
REXO2	ENSG00000076043	protein_coding	0	0	-0.0661915	0.833234	0	0	0.332168	0.411737	0	0	0.464015	0.108625	0
RBM7	ENSG00000076053	protein_coding	0	0	0.277373	0.277295	0	0	0.268357	0.524409	0	0	-0.0211516	0.952309	0
RBMS2	ENSG00000076067	protein_coding	0	0	-0.245693	0.208249	0	0	-0.0723378	0.859956	0	0	-0.248439	0.264317	0
BAZ2A	ENSG00000076108	protein_coding	0	0	0.022559	0.916347	0	0	-0.0730866	0.804462	0	0	-0.130952	0.481815	0
PTPN23	ENSG00000076201	protein_coding	0	0	0.211938	0.452753	0	0	-0.268001	0.490712	0	0	-0.193087	0.533081	0
MLH1	ENSG00000076242	protein_coding	0	0	-0.0292498	0.91064	0	0	0.372704	0.195554	0	0	0.386025	0.0846701	0
UNG	ENSG00000076248	protein_coding	1	0	0.656638	0.000212766	1	0	0.630491	0.0275454	1	0	0.641629	0.00415411	1
FMO4	ENSG00000076258	protein_coding	0	0	0.354849	0.871063	0	0	0.65518	0.830893	0	0	0.505024	0.851448	0
KLHL20	ENSG00000076321	protein_coding	0	0	0.0353536	0.936431	0	0	1.14049	0.0106182	1	0	0.985836	0.00857509	1
RGS11	ENSG00000076344	protein_coding	0	0	NA	NA	0	0	NA	NA	0	0	NA	NA	0
SLC46A1	ENSG00000076351	protein_coding	0	0	-0.116839	0.91691	0	0	-0.183346	0.907526	0	0	-0.672274	0.448951	0
PLXNA2	ENSG00000076356	protein_coding	0	0	-1.02404	0.00425539	0	1	-0.414673	0.610578	0	0	-0.684927	0.168608	0
SPAG5	ENSG00000076382	protein_coding	1	0	1.05429	2.20412e-19	1	0	0.544995	0.00161317	1	0	0.607105	2.74651e-05	1
ANKRD13A	ENSG00000076513	protein_coding	0	0	0.108384	0.826419	0	0	0.263389	0.717521	0	0	0.452205	0.364646	0
TPD52	ENSG00000076554	protein_coding	0	0	-0.425755	0.045993	0	1	0.142886	0.782243	0	0	0.125687	0.720386	0
ACACB	ENSG00000076555	protein_coding	0	0	-0.914189	0.102232	0	0	-0.536048	0.658389	0	0	-0.709663	0.357794	0
TRAF4	ENSG00000076604	protein_coding	0	0	-0.133277	0.587083	0	0	-0.331911	0.287281	0	0	-0.55456	0.00498087	0
PAG1	ENSG00000076641	protein_coding	0	0	0.883075	0.414995	0	0	-0.21283	0.898227	0	0	-0.428833	0.698147	0
GPATCH1	ENSG00000076650	protein_coding	0	0	0.883047	0.00299253	1	0	0.609936	0.206574	0	0	1.82038	2.43052e-05	1
ICAM3	ENSG00000076662	protein_coding	0	0	0.604634	NA	0	0	0.380163	NA	0	0	-0.48692	NA	0
NT5C2	ENSG00000076685	protein_coding	0	0	-0.0410536	0.91553	0	0	0.25473	0.61576	0	0	0.679519	0.0422528	1
MCAM	ENSG00000076706	protein_coding	1	0	0.447632	9.69247e-05	1	0	0.506579	0.00183951	1	0	0.474892	0.000633485	1
GPC4	ENSG00000076716	protein_coding	0	0	0.32357	0.116847	0	0	0.473943	0.154322	0	0	0.272326	0.299244	0
MBNL3	ENSG00000076770	protein_coding	0	0	-0.174069	0.87636	0	0	-0.50538	0.715756	0	0	-0.493404	0.631249	0
CAMSAP3	ENSG00000076826	protein_coding	0	0	-0.584298	0.334763	0	0	-0.375825	0.742502	0	0	-0.721198	0.302031	0
RAP1GAP	ENSG00000076864	protein_coding	0	0	0.581066	0.363567	0	0	0.0779877	0.947695	0	0	-0.0143792	0.985769	0
XAB2	ENSG00000076924	protein_coding	0	0	-0.0209721	0.952978	0	0	0.235977	0.584622	0	0	0.575854	0.0400197	1
ARHGEF1	ENSG00000076928	protein_coding	0	0	0.0604702	0.849496	0	0	0.268481	0.537623	0	0	0.169982	0.591978	0
STXBP2	ENSG00000076944	protein_coding	0	0	-0.324413	0.653601	0	0	-0.262753	0.830878	0	0	-0.434164	0.566342	0
MAP2K7	ENSG00000076984	protein_coding	0	0	0.0489446	0.913134	0	0	-0.228106	0.681907	0	0	-0.260814	0.493887	0
NMRK2	ENSG00000077009	protein_coding	0	0	NA	NA	0	0	-2.47761	NA	0	0	-4.38142	NA	0
DGKD	ENSG00000077044	protein_coding	0	0	0.16854	0.412809	0	0	0.247974	0.437816	0	0	0.289627	0.205918	0
CTTNBP2	ENSG00000077063	protein_coding	0	0	0.564632	0.518869	0	0	0.245019	0.85502	0	0	-0.299727	0.721206	0
ACTL6B	ENSG00000077080	protein_coding	0	0	0.604634	NA	0	0	-2.6218	NA	0	0	-2.93466	NA	0
RARB	ENSG00000077092	protein_coding	0	0	0.970745	NA	0	0	0.434033	0.89197	0	0	0.800343	0.802862	0
TOP2B	ENSG00000077097	protein_coding	1	0	0.462271	2.47325e-07	1	0	1.56727	1.5331e-30	1	0	1.87183	7.37307e-49	1
TM9SF3	ENSG00000077147	protein_coding	1	0	0.30088	0.00834471	1	0	0.829136	1.44915e-07	1	0	0.71242	1.1952e-07	1
NFKB2	ENSG00000077150	protein_coding	0	0	0.106625	0.629396	0	0	0.412438	0.162435	0	0	0.870437	3.43115e-05	1
UBE2T	ENSG00000077152	protein_coding	1	0	1.27689	4.65056e-10	1	0	0.676768	0.0284528	1	0	0.997985	9.19805e-05	1
PPP1R12B	ENSG00000077157	protein_coding	0	1	-0.9744	0.00487557	0	1	-1.706	1.10517e-05	0	1	-1.3758	0.000129072	0
DNAJC10	ENSG00000077232	protein_coding	0	0	0.0731698	0.61924	0	0	0.83194	5.38528e-08	1	0	0.859764	5.18763e-11	1
GTF3C1	ENSG00000077235	protein_coding	1	0	0.621673	2.90169e-07	1	0	0.84596	3.39753e-06	1	0	0.939595	3.62106e-09	1
IL4R	ENSG00000077238	protein_coding	0	0	0.970977	0.0331302	1	0	0.759606	0.28567	0	0	0.944836	0.0956776	0
USP33	ENSG00000077254	protein_coding	0	0	0.0885536	0.688278	0	0	0.783928	0.00128499	1	0	0.95649	6.23808e-06	1
PAK3	ENSG00000077264	protein_coding	0	0	0.117885	0.858078	0	0	0.467069	0.59685	0	0	0.950601	0.144399	0
CAPN6	ENSG00000077274	protein_coding	0	0	-1.38379	0.104052	0	0	0.0555147	0.982598	0	0	-0.035084	0.985887	0
DCX	ENSG00000077279	protein_coding	0	0	2.15625	NA	0	0	2.9509	NA	0	0	2.08696	0.539674	0
SNRPA	ENSG00000077312	protein_coding	0	1	-0.755458	1.95791e-05	0	1	-0.656088	0.0342593	0	1	-0.712785	0.00111178	0
SPAG6	ENSG00000077327	protein_coding	0	0	-2.29695	NA	0	0	NA	NA	0	0	NA	NA	0
EXOSC5	ENSG00000077348	protein_coding	0	0	-1.02774	0.0329805	0	1	-0.731945	0.40459	0	0	-1.10329	0.0473532	0
DYNC1I2	ENSG00000077380	protein_coding	1	0	0.636632	2.71026e-07	1	0	1.03929	4.07339e-08	1	0	1.03045	2.19455e-10	1
APBB1IP	ENSG00000077420	protein_coding	0	0	NA	NA	0	0	-2.58625	NA	0	0	NA	NA	0
LRCH4	ENSG00000077454	protein_coding	0	0	-0.169627	0.821005	0	0	-1.08419	0.0793606	0	0	-1.02972	0.0368781	0
FAM76B	ENSG00000077458	protein_coding	0	0	0.0040979	0.991598	0	0	0.567616	0.202567	0	0	1.0328	0.00203925	1
SIRT6	ENSG00000077463	protein_coding	0	0	-0.728237	0.126217	0	0	-0.542473	0.520966	0	0	-0.229126	0.771236	0
TYR	ENSG00000077498	protein_coding	0	0	-1.84417	NA	0	0	0.375627	NA	0	0	-3.55914	NA	0
POLD3	ENSG00000077514	protein_coding	1	0	0.437138	0.0185051	1	0	0.834035	0.00200771	1	0	0.656566	0.0024141	1
ACTN2	ENSG00000077522	protein_coding	0	0	-1.50964	0.216412	0	0	-2.30926	0.0666306	0	0	-2.05815	0.0877027	0
CAPZB	ENSG00000077549	protein_coding	0	0	-0.16112	0.27728	0	0	-0.330695	0.0888629	0	0	-0.447299	0.00189037	0
GPR137B	ENSG00000077585	protein_coding	0	0	-0.100568	0.877432	0	0	0.178574	0.858254	0	0	-1.2466	0.000513624	0
NAALAD2	ENSG00000077616	protein_coding	0	0	-0.581508	0.135008	0	0	-0.968366	0.0534821	0	0	-0.720363	0.104396	0
JADE1	ENSG00000077684	protein_coding	1	0	0.525819	4.30036e-05	1	0	1.05533	1.70775e-07	1	0	1.49604	1.12183e-16	1
SLC25A43	ENSG00000077713	protein_coding	0	0	0.139702	0.813517	0	0	0.4792	0.551765	0	0	0.514637	0.3926	0
UBE2A	ENSG00000077721	protein_coding	0	0	0.0633086	0.862514	0	0	0.136167	0.800162	0	0	-0.0347459	0.927718	0
FGFR1	ENSG00000077782	protein_coding	0	0	0.44701	0.0077067	1	0	0.339175	0.214455	0	0	0.440851	0.030223	1
FKBP6	ENSG00000077800	protein_coding	0	0	NA	NA	0	0	-2.58625	NA	0	0	-3.33993	NA	0
SMC1B	ENSG00000077935	protein_coding	0	0	-2.06431	NA	0	0	-2.09742	NA	0	0	-3.69363	0.0297716	0
FBLN1	ENSG00000077942	protein_coding	0	0	-0.0217927	0.917665	0	0	-0.300702	0.159483	0	0	-0.272339	0.0748873	0
ITGA8	ENSG00000077943	protein_coding	0	0	-1.82435	NA	0	0	1.38102	NA	0	0	-0.89174	NA	0
CST7	ENSG00000077984	protein_coding	0	0	-0.834291	NA	0	0	-0.663792	NA	0	0	-1.71103	0.439386	0
MAP2	ENSG00000078018	protein_coding	0	0	-0.727734	0.00138102	0	1	0.155875	0.811203	0	0	0.414521	0.324185	0
PIAS2	ENSG00000078043	protein_coding	0	0	-0.175936	0.572909	0	0	-0.210496	0.67671	0	0	-0.211746	0.537107	0
AMPH	ENSG00000078053	protein_coding	0	0	0.785609	0.000258328	1	0	0.505083	0.144416	0	0	0.255655	0.3633	0
ARAF	ENSG00000078061	protein_coding	0	0	-0.0962968	0.764703	0	0	-0.491742	0.138452	0	0	-0.484735	0.0613731	0
MCCC1	ENSG00000078070	protein_coding	0	0	-0.639962	0.0254997	0	1	0.00943336	0.989961	0	0	0.472765	0.313754	0
LAMP3	ENSG00000078081	protein_coding	0	0	-2.53596	1.22729e-05	0	1	-1.24605	0.38037	0	0	-0.72098	0.635299	0
FAP	ENSG00000078098	protein_coding	0	0	-1.79959	0.0441217	0	1	-0.228283	0.933826	0	0	-0.935286	0.573875	0
NEBL	ENSG00000078114	protein_coding	0	0	-0.421025	0.359611	0	0	0.354036	0.711742	0	0	0.592872	0.36903	0
ACER3	ENSG00000078124	protein_coding	0	0	0.102857	0.793976	0	0	0.0684149	0.917877	0	0	-0.254652	0.470062	0
UBE2K	ENSG00000078140	protein_coding	0	0	0.0863868	0.615788	0	0	0.465532	0.0252329	1	0	0.635407	6.64798e-05	1
PIK3C3	ENSG00000078142	protein_coding	0	0	-0.0285852	0.949663	0	0	0.146022	0.821682	0	0	0.499605	0.190079	0
N4BP2	ENSG00000078177	protein_coding	0	0	-0.13063	0.473856	0	0	0.763219	0.00189755	1	0	0.937583	1.31185e-06	1
TIGAR	ENSG00000078237	protein_coding	0	0	0.083325	0.804065	0	0	0.625936	0.107595	0	0	0.459566	0.144558	0
TULP3	ENSG00000078246	protein_coding	0	0	-0.312469	0.0770503	0	0	0.346939	0.289757	0	0	0.632735	0.00655263	1
SYNJ2	ENSG00000078269	protein_coding	0	0	-0.25343	0.126561	0	0	0.217108	0.489022	0	0	0.265109	0.234006	0
ADCY2	ENSG00000078295	protein_coding	0	0	0.0754998	0.951926	0	0	0.165703	0.922771	0	0	-0.372539	0.727575	0
PPP2R5C	ENSG00000078304	protein_coding	0	0	0.0815629	0.709808	0	0	0.150417	0.646056	0	0	0.216582	0.329057	0
PMS2P1	ENSG00000078319	unprocessed_pseudogene	0	0	0.0174578	0.985688	0	0	-0.187783	0.890189	0	0	-0.346345	0.684389	0
RBFOX1	ENSG00000078328	protein_coding	0	0	0.153324	0.952696	0	0	-0.282478	0.92421	0	0	0.793193	0.808581	0
GNB1	ENSG00000078369	protein_coding	0	0	0.035307	0.841968	0	0	-0.319795	0.0602616	0	0	-0.404006	0.00124012	0
HOXA9	ENSG00000078399	protein_coding	0	0	0.979527	0.0342707	1	0	1.06426	0.131124	0	0	0.627403	0.286597	0
EDN1	ENSG00000078401	protein_coding	0	0	0.233079	0.57422	0	0	0.1649	0.819366	0	0	0.229291	0.632798	0
MLLT10	ENSG00000078403	protein_coding	0	0	-0.0126409	0.966263	0	0	-0.149913	0.685745	0	0	-0.181958	0.448344	0
ZCWPW1	ENSG00000078487	protein_coding	0	0	-0.393287	0.741038	0	0	0.374278	0.861649	0	0	-0.334708	0.819797	0
ADCYAP1R1	ENSG00000078549	protein_coding	0	0	2.1591	0.218011	0	0	-0.278985	0.898227	0	0	-0.529048	0.729956	0
FGF20	ENSG00000078579	protein_coding	0	0	-0.839461	NA	0	0	-1.03707	NA	0	0	-2.02904	NA	0
P2RY10	ENSG00000078589	protein_coding	0	0	NA	NA	0	0	NA	NA	0	0	NA	NA	0
ITM2A	ENSG00000078596	protein_coding	0	0	0.598342	NA	0	0	-1.13756	NA	0	0	-0.493993	NA	0
NRDC	ENSG00000078618	protein_coding	0	0	0.212792	0.0635671	0	0	0.755371	6.49857e-06	1	0	0.771278	8.20349e-10	1
VDAC3	ENSG00000078668	protein_coding	0	0	0.336773	0.0390446	1	0	0.435376	0.0759217	0	0	0.357552	0.0704848	0
PCM1	ENSG00000078674	protein_coding	0	0	-0.050026	0.766026	0	0	0.822491	2.53134e-06	1	0	1.05166	1.38318e-12	1
TNRC6C	ENSG00000078687	protein_coding	0	0	-0.56268	0.185891	0	0	-0.413631	0.585393	0	0	0.14344	0.841886	0
CBFA2T2	ENSG00000078699	protein_coding	0	0	-0.186392	0.524565	0	0	-0.204229	0.648587	0	0	-0.489561	0.0478031	0
BRINP1	ENSG00000078725	protein_coding	0	0	0.768959	0.458271	0	0	-0.380026	0.800476	0	0	0.0680024	0.958183	0
ITCH.1	ENSG00000078747	protein_coding	0	0	-0.00876553	0.980351	0	0	0.538008	0.13489	0	0	0.951497	0.000700858	1
PKD2L2	ENSG00000078795	protein_coding	0	0	-2.16698	NA	0	0	-3.51966	0.147271	0	0	-3.52248	0.144982	0
TP53INP2	ENSG00000078804	protein_coding	0	0	-0.225779	0.448992	0	0	-0.757761	0.0195486	0	1	-1.46956	9.50232e-15	0
SDF4	ENSG00000078808	protein_coding	0	0	0.212328	0.567877	0	0	0.522111	0.0183306	1	0	0.656937	0.000136113	1
MYH7B	ENSG00000078814	protein_coding	0	0	-0.257549	0.857218	0	0	-2.02471	0.0200062	0	1	-2.08884	0.00258899	0
BPIFB2	ENSG00000078898	protein_coding	0	0	NA	NA	0	0	NA	NA	0	0	NA	NA	0
TP73	ENSG00000078900	protein_coding	0	0	0.0542092	0.936301	0	0	-0.415828	0.571906	0	0	0.239012	0.714843	0
TOLLIP	ENSG00000078902	protein_coding	0	0	0.103686	0.820263	0	0	0.236735	0.730068	0	0	0.435589	0.329041	0
UBE2D4	ENSG00000078967	protein_coding	0	0	-0.164426	0.736725	0	0	0.132167	0.878312	0	0	-0.424644	0.334192	0
CLUL1	ENSG00000079101	protein_coding	0	0	0.42167	NA	0	0	1.58136	NA	0	0	0.0366572	0.990451	0
RUNX1T1	ENSG00000079102	protein_coding	0	0	-0.246728	NA	0	0	-0.4012	NA	0	0	-2.40247	0.411975	0
CDH17	ENSG00000079112	protein_coding	0	0	1.60583	NA	0	0	1.38102	NA	0	0	-1.01554	NA	0
THOC1	ENSG00000079134	protein_coding	0	0	-0.0600209	0.876331	0	0	-0.17223	0.748182	0	0	-0.0539306	0.895288	0
FKBP7	ENSG00000079150	protein_coding	0	0	0.44228	0.524766	0	0	0.778277	0.468445	0	0	1.17396	0.170911	0
OSBPL6	ENSG00000079156	protein_coding	0	0	-0.948001	3.81518e-05	0	1	0.136683	0.851413	0	0	0.426776	0.349432	0
SLC1A3	ENSG00000079215	protein_coding	0	0	0.664692	0.000363175	1	0	-0.088197	0.819645	0	0	-0.0233125	0.934031	0
XRCC5	ENSG00000079246	protein_coding	1	0	0.826139	1.19452e-32	1	0	0.934376	1.67823e-15	1	0	1.02374	1.55797e-29	1
LXN	ENSG00000079257	protein_coding	0	0	-2.28029	NA	0	0	-3.60239	NA	0	0	-3.47269	NA	0
SP140	ENSG00000079263	protein_coding	0	0	-0.385058	0.797154	0	0	0.0682686	0.979969	0	0	-0.25254	0.897086	0
MKNK1	ENSG00000079277	protein_coding	0	0	-0.853322	0.660756	0	0	-1.79855	0.281885	0	0	-2.41357	0.0335866	0
TNS1	ENSG00000079308	protein_coding	0	0	0.95883	1.65496e-11	1	0	-0.163901	0.53484	0	0	0.092263	0.666694	0
REXO1	ENSG00000079313	protein_coding	0	0	-0.237787	0.48282	0	0	0.0293743	0.96662	0	0	-0.132993	0.755491	0
SAR1A	ENSG00000079332	protein_coding	1	0	0.938803	1.263e-17	1	0	0.556308	0.000759475	1	0	0.496853	0.000330971	1
CDC14A	ENSG00000079335	protein_coding	0	0	-0.0579084	0.923035	0	0	0.155718	0.858254	0	0	0.0785617	0.901789	0
RAPGEF3	ENSG00000079337	protein_coding	0	0	-1.60023	0.138647	0	0	-2.08122	0.112324	0	0	-1.91654	0.115332	0
CEACAM1	ENSG00000079385	protein_coding	0	0	-2.42439	NA	0	0	-2.74241	NA	0	0	-4.32164	0.158175	0
SENP1	ENSG00000079387	protein_coding	0	0	0.290694	0.156795	0	0	0.207198	0.584472	0	0	0.217301	0.40512	0
DUSP13	ENSG00000079393	protein_coding	0	0	0.604634	NA	0	0	-1.03278	NA	0	0	-4.3614	0.174601	0
CIC	ENSG00000079432	protein_coding	0	0	0.0703479	0.732063	0	0	-0.305164	0.232019	0	0	-0.111828	0.608476	0
LIPE	ENSG00000079435	protein_coding	0	0	-0.29412	0.774876	0	0	-0.835803	0.42544	0	0	-1.17507	0.0790517	0
FDFT1	ENSG00000079459	protein_coding	0	0	1.21494	4.38771e-11	1	0	0.34816	0.269633	0	0	0.31517	0.201089	0
PAFAH1B3	ENSG00000079462	protein_coding	0	0	-0.078083	0.855433	0	0	-0.252101	0.64346	0	0	-0.0187041	0.968837	0
OPHN1	ENSG00000079482	protein_coding	0	0	-0.0702834	0.886206	0	0	0.312849	0.633726	0	0	0.756791	0.0963863	0
AFM	ENSG00000079557	protein_coding	0	0	NA	NA	0	0	NA	NA	0	0	NA	NA	0
KIF22	ENSG00000079616	protein_coding	0	0	0.0366845	0.898129	0	0	0.0658353	0.876443	0	0	0.107053	0.681447	0
SCGN	ENSG00000079689	protein_coding	0	0	NA	NA	0	0	NA	NA	0	0	NA	NA	0
CARMIL1	ENSG00000079691	protein_coding	0	0	0.248586	0.390605	0	0	0.183643	0.720409	0	0	0.309808	0.357312	0
PGM1	ENSG00000079739	protein_coding	0	0	0.0192468	0.952865	0	0	0.433908	0.2003	0	0	1.04032	4.68634e-05	1
DDX1	ENSG00000079785	protein_coding	1	0	0.372417	0.000744673	1	0	0.692303	1.02942e-05	1	0	0.783698	7.19095e-09	1
DNM2	ENSG00000079805	protein_coding	0	0	-0.0790209	0.758232	0	0	-0.382423	0.178821	0	0	-0.228002	0.332798	0
EPB41L2	ENSG00000079819	protein_coding	1	0	0.496272	0.00641111	1	0	0.395593	0.0159936	1	0	0.72009	1.14089e-09	1
RIMS1	ENSG00000079841	protein_coding	0	0	0.350335	0.871323	0	0	0.93228	0.756518	0	0	-0.54891	0.787331	0
MOXD1	ENSG00000079931	protein_coding	0	0	-0.194409	0.430095	0	0	0.35712	0.360017	0	0	0.222481	0.469084	0
STX7	ENSG00000079950	protein_coding	0	0	0.331924	0.134245	0	0	0.856068	0.0063623	1	0	1.06566	6.76055e-05	1
RABL2B	ENSG00000079974	protein_coding	0	0	-0.68537	0.0227783	0	1	-0.202919	0.781885	0	0	-0.561994	0.156777	0
KEAP1	ENSG00000079999	protein_coding	0	0	0.164351	0.49974	0	0	0.137924	0.749543	0	0	0.190969	0.496226	0
DDX43	ENSG00000080007	protein_coding	0	0	0.526001	0.23824	0	0	0.551868	0.440477	0	0	1.21191	0.02982	1
PTPRH	ENSG00000080031	protein_coding	0	0	-0.047575	0.959362	0	0	-0.491915	0.62155	0	0	-0.0770591	0.938613	0
DCT	ENSG00000080166	protein_coding	0	0	0.604634	NA	0	0	-2.97218	NA	0	0	-2.02209	NA	0
SLC35C2	ENSG00000080189	protein_coding	0	0	-0.342028	0.0817919	0	0	-0.371578	0.226394	0	0	-0.957883	2.6047e-08	0
CRYBG3	ENSG00000080200	protein_coding	0	0	0.0671146	0.826589	0	0	0.494227	0.136522	0	0	0.743006	0.00411152	1
EPHA6	ENSG00000080224	protein_coding	0	0	0.0225213	0.98517	0	0	0.231456	0.889088	0	0	0.273972	0.825044	0
SCTR	ENSG00000080293	protein_coding	0	0	-2.28029	NA	0	0	-3.99879	NA	0	0	-5.68154	0.0673408	0
RFX3	ENSG00000080298	protein_coding	0	0	-0.393336	0.246305	0	0	-0.0712838	0.924083	0	0	-0.145396	0.766212	0
RIF1	ENSG00000080345	protein_coding	0	0	-0.263464	0.0125321	0	0	0.415932	0.0210612	1	0	0.5227	0.00011475	1
RAB21	ENSG00000080371	protein_coding	0	0	0.229199	0.401465	0	0	0.686686	0.0978423	0	0	0.589205	0.044429	1
SLC4A4	ENSG00000080493	protein_coding	0	0	-0.391415	0.714679	0	0	0.60786	0.760657	0	0	1.24867	0.448729	0
SMARCA2	ENSG00000080503	protein_coding	0	0	-0.0937338	0.739455	0	0	0.541626	0.135868	0	0	0.716824	0.00378183	1
RDH8	ENSG00000080511	protein_coding	0	0	NA	NA	0	0	NA	NA	0	0	-3.33993	NA	0
SESN1	ENSG00000080546	protein_coding	0	0	0.669588	0.0767809	0	0	1.12715	0.0495567	1	0	1.33767	0.00647204	1
MID2	ENSG00000080561	protein_coding	0	0	-0.0955329	0.925362	0	0	0.635805	0.64346	0	0	-0.0783786	0.941471	0
PIH1D3	ENSG00000080572	protein_coding	0	0	NA	NA	0	0	NA	NA	0	0	-3.47269	NA	0
COL5A3	ENSG00000080573	protein_coding	0	0	-0.143114	0.87636	0	0	-1.33365	0.0486118	0	1	-0.639373	0.407153	0
SRCAP	ENSG00000080603	protein_coding	0	0	-0.0650576	0.956337	0	0	-0.639257	0.590137	0	0	-0.349929	0.743865	0
PUM3	ENSG00000080608	protein_coding	0	0	0.150518	0.565991	0	0	0.489744	0.182866	0	0	0.87937	0.00101409	1
CPB2	ENSG00000080618	protein_coding	0	0	0.604634	NA	0	0	0.380163	NA	0	0	-1.89224	NA	0
CHRNA3	ENSG00000080644	protein_coding	0	0	0.405578	0.684807	0	0	-0.0688356	0.965703	0	0	-0.0779415	0.945609	0
KCNN2	ENSG00000080709	protein_coding	0	0	0.0154381	0.994541	0	0	0.413877	0.880795	0	0	-0.115176	0.960213	0
CNOT4	ENSG00000080802	protein_coding	0	0	-0.216993	0.609857	0	0	-0.562054	0.262848	0	0	-0.436251	0.278335	0
PSEN1	ENSG00000080815	protein_coding	0	0	-0.168322	0.356986	0	0	-0.0759552	0.842687	0	0	0.0111853	0.967504	0
CPOX	ENSG00000080819	protein_coding	1	0	1.62265	9.78145e-24	1	0	1.64595	6.39185e-12	1	0	1.75853	1.53851e-05	1
CLDND1	ENSG00000080822	protein_coding	0	0	-0.0757094	0.795023	0	0	0.0572906	0.909631	0	0	-0.279125	0.261419	0
MOK	ENSG00000080823	protein_coding	0	0	-0.395871	0.614911	0	0	-0.589836	0.589087	0	0	-0.323353	0.742716	0
HSP90AA1	ENSG00000080824	protein_coding	1	0	0.836573	2.44203e-27	1	0	0.636241	6.15053e-09	1	0	0.775798	3.04612e-21	1
RBL1	ENSG00000080839	protein_coding	0	0	0.160458	0.533693	0	0	0.747298	0.0115523	1	0	0.892243	0.000305627	1
DLGAP4	ENSG00000080845	protein_coding	0	0	-0.109967	0.627535	0	0	-0.467228	0.0586591	0	0	-1.10547	2.50114e-14	0
IGSF9B	ENSG00000080854	protein_coding	0	0	1.08804	0.204134	0	0	0.033292	0.98297	0	0	-0.892742	0.190333	0
CFHR2	ENSG00000080910	protein_coding	0	0	NA	NA	0	0	NA	NA	0	0	NA	NA	0
CROCCP3	ENSG00000080947	transcribed_unprocessed_pseudogene	0	0	-0.378712	0.670306	0	0	-0.842573	0.420224	0	0	-0.828275	0.307729	0
NDC80	ENSG00000080986	protein_coding	1	0	0.41177	3.7975e-05	1	0	0.514078	0.000898224	1	0	0.608637	1.08381e-06	1
AP4E1	ENSG00000081014	protein_coding	0	0	0.181309	0.636431	0	0	0.433234	0.42015	0	0	0.934427	0.0178658	1
RSBN1	ENSG00000081019	protein_coding	1	0	0.60885	0.00169816	1	0	1.05316	0.000309372	1	0	1.05507	2.40439e-05	1
MAGI3	ENSG00000081026	protein_coding	0	0	0.168989	0.484973	0	0	0.352372	0.326751	0	0	0.425035	0.101628	0
CXCL2	ENSG00000081041	protein_coding	0	0	NA	NA	0	0	NA	NA	0	0	NA	NA	0
AFP	ENSG00000081051	protein_coding	0	0	0.737091	NA	0	0	0.43521	NA	0	0	-1.23388	0.856988	0
COL4A4	ENSG00000081052	protein_coding	0	0	0.150248	0.669684	0	0	-0.276747	0.545574	0	0	0.251683	0.512788	0
TCF7	ENSG00000081059	protein_coding	0	0	-0.519038	0.673667	0	0	-2.76932	4.0894e-05	0	1	-2.74816	1.5029e-06	0
OSTM1	ENSG00000081087	protein_coding	0	0	0.497105	0.172821	0	0	1.10473	0.0377151	1	0	1.34087	0.00389991	1
CDH7	ENSG00000081138	protein_coding	0	0	0.384054	NA	0	0	1.76501	NA	0	0	0.816606	NA	0
IMPG2	ENSG00000081148	protein_coding	0	0	-2.43056	NA	0	0	-2.80433	0.250791	0	0	-4.13376	0.00944053	0
PCNP	ENSG00000081154	protein_coding	0	0	0.0278483	0.894102	0	0	0.374746	0.121369	0	0	0.64683	8.7226e-05	1
EXD2	ENSG00000081177	protein_coding	0	0	0.380651	0.243327	0	0	0.902489	0.0492121	1	0	0.209201	0.612272	0
ARG2	ENSG00000081181	protein_coding	0	0	-0.415336	0.495186	0	0	-0.693844	0.388563	0	0	-0.857511	0.119601	0
MEF2C	ENSG00000081189	protein_coding	0	0	0.0877817	0.948205	0	0	0.171772	0.926811	0	0	0.372248	0.798022	0
PTPRC	ENSG00000081237	protein_coding	0	0	0.92277	NA	0	0	3.03746	NA	0	0	2.17291	0.511133	0
CACNA1S	ENSG00000081248	protein_coding	0	0	NA	NA	0	0	-2.58625	NA	0	0	-3.47269	NA	0
PKP1	ENSG00000081277	protein_coding	0	0	NA	NA	0	0	NA	NA	0	0	-3.47269	NA	0
UBA5	ENSG00000081307	protein_coding	0	0	0.278904	0.222364	0	0	1.07946	0.000506702	1	0	1.23275	4.94185e-06	1
STK17B	ENSG00000081320	protein_coding	0	0	0.480918	0.0176139	1	0	0.49294	0.151145	0	0	0.614598	0.0137099	1
CDC14B	ENSG00000081377	protein_coding	0	0	0.182572	0.609385	0	0	0.398033	0.483958	0	0	0.396283	0.292309	0
ZNF510	ENSG00000081386	protein_coding	0	0	0.163254	0.68507	0	0	0.420765	0.453229	0	0	0.180228	0.689563	0
LRP2	ENSG00000081479	protein_coding	0	0	-3.43743	NA	0	0	-2.74241	NA	0	0	-4.2813	0.160996	0
ZNF506	ENSG00000081665	protein_coding	0	0	1.14975	NA	0	0	-0.1443	NA	0	0	-3.13769	0.0673408	0
JMJD4	ENSG00000081692	protein_coding	0	0	0.241423	0.821445	0	0	-0.063843	0.969262	0	0	-1.21561	0.0737637	0
DUSP12	ENSG00000081721	protein_coding	0	0	0.219113	0.581754	0	0	0.454209	0.43003	0	0	0.992546	0.0172755	1
AACS	ENSG00000081760	protein_coding	0	0	-0.0775549	0.803065	0	0	-0.39554	0.246512	0	0	-0.188301	0.540213	0
KIAA0141	ENSG00000081791	protein_coding	0	0	-0.066345	0.871134	0	0	-0.464008	0.258516	0	0	-0.617538	0.0225266	0
SLC13A1	ENSG00000081800	protein_coding	0	0	NA	NA	0	0	NA	NA	0	0	NA	NA	0
CADPS2	ENSG00000081803	protein_coding	0	0	0.794984	0.11823	0	0	0.51238	0.545932	0	0	1.21987	0.0731466	0
PCDHB4	ENSG00000081818	protein_coding	0	0	-2.42439	NA	0	0	-2.6831	NA	0	0	-0.493993	NA	0
PCDHA6	ENSG00000081842	protein_coding	0	0	-0.0383193	0.967017	0	0	0.379454	0.760616	0	0	0.9698	0.283764	0
PCDHGA2	ENSG00000081853	protein_coding	0	0	-2.84032	NA	0	0	-2.15232	NA	0	0	-0.48692	NA	0
HSPB11	ENSG00000081870	protein_coding	0	0	0.038658	0.938786	0	0	-0.43859	0.362875	0	0	0.0155666	0.97551	0
PHLPP1	ENSG00000081913	protein_coding	0	0	0.536773	0.117206	0	0	0.327814	0.590964	0	0	0.468847	0.293922	0
ATP8B1	ENSG00000081923	protein_coding	0	0	2.23767	NA	0	0	-1.4251	0.337726	0	0	-1.93199	0.0528055	0
IL12RB2	ENSG00000081985	protein_coding	0	0	-1.71686	NA	0	0	-2.72571	0.0956353	0	0	-2.6543	0.0887088	0
SMARCD3	ENSG00000082014	protein_coding	0	0	-0.597562	0.189481	0	0	-0.03391	0.975984	0	0	-0.113812	0.879437	0
WDR70	ENSG00000082068	protein_coding	0	0	0.266053	0.253186	0	0	0.342078	0.370609	0	0	0.382019	0.160996	0
FYB	ENSG00000082074	protein_coding	0	0	-3.28518	NA	0	0	NA	NA	0	0	-3.47269	NA	0
MPP4	ENSG00000082126	protein_coding	0	0	-0.26828	NA	0	0	-2.66193	0.302969	0	0	-2.96791	0.192835	0
STRADB	ENSG00000082146	protein_coding	0	0	0.164881	0.765262	0	0	0.104865	0.904368	0	0	-0.280415	0.580767	0
BZW1	ENSG00000082153	protein_coding	1	0	0.493443	4.70494e-09	1	0	0.838244	7.08867e-10	1	0	0.80925	3.76176e-13	1
PGR	ENSG00000082175	protein_coding	0	0	-0.436604	NA	0	0	-1.11417	NA	0	0	-0.0188449	NA	0
C1QTNF3	ENSG00000082196	protein_coding	0	0	0.430918	0.768369	0	0	-0.507998	0.778786	0	0	1.39827	0.502506	0
ME2	ENSG00000082212	protein_coding	0	0	-0.184649	0.298289	0	0	0.549413	0.0277786	1	0	1.07402	6.46396e-08	1
C5orf22	ENSG00000082213	protein_coding	0	0	0.242785	0.298289	0	0	0.259859	0.48332	0	0	-0.0320088	0.918449	0
CCNT2	ENSG00000082258	protein_coding	0	0	0.0193845	0.950228	0	0	0.443993	0.228285	0	0	0.500311	0.0405391	1
FAM135A	ENSG00000082269	protein_coding	0	0	0.12544	0.714535	0	0	0.728661	0.0879276	0	0	0.813989	0.0167377	1
COL19A1	ENSG00000082293	protein_coding	0	0	0.7486	NA	0	0	0.466268	NA	0	0	-0.313013	NA	0
EPB41L3	ENSG00000082397	protein_coding	0	0	0.435781	0.00122604	1	0	0.190555	0.47892	0	0	0.283804	0.115739	0
COBLL1	ENSG00000082438	protein_coding	0	0	0.0787459	0.862514	0	0	0.66696	0.247313	0	0	0.443574	0.294627	0
DLG3	ENSG00000082458	protein_coding	0	0	0.434612	0.423155	0	0	-0.17063	0.849976	0	0	0.820626	0.19311	0
KCNK2	ENSG00000082482	protein_coding	0	0	0.382635	NA	0	0	1.76387	NA	0	0	-0.21814	NA	0
SERTAD4	ENSG00000082497	protein_coding	0	0	1.88313	0.174451	0	0	3.96414	0.121343	0	0	4.55148	0.0594603	0
TRAF5	ENSG00000082512	protein_coding	0	0	0.315795	0.493523	0	0	0.026213	0.976052	0	0	0.0944193	0.866166	0
MRPL22	ENSG00000082515	protein_coding	0	0	0.10366	0.830104	0	0	-0.184927	0.787416	0	0	0.165651	0.744552	0
GEMIN5	ENSG00000082516	protein_coding	1	0	0.627441	8.4665e-05	1	0	0.96941	0.000205374	1	0	1.24906	5.77873e-09	1
OPRK1	ENSG00000082556	protein_coding	0	0	0.787813	0.53525	0	0	-0.326094	0.856597	0	0	0.262774	0.931602	0
NFE2L1	ENSG00000082641	protein_coding	0	0	-0.506057	5.98211e-08	0	1	0.231323	0.24443	0	0	0.536493	0.000126361	1
SEMA5B	ENSG00000082684	protein_coding	0	0	-3.30014	NA	0	0	-3.51116	NA	0	0	NA	NA	0
GSK3B	ENSG00000082701	protein_coding	0	0	-0.0234215	0.911836	0	0	0.212566	0.392747	0	0	0.293125	0.0998536	0
ITGB5	ENSG00000082781	protein_coding	0	0	0.0453331	0.805596	0	0	0.320125	0.104414	0	0	0.88054	1.85667e-09	1
ERC1	ENSG00000082805	protein_coding	0	0	0.193566	0.178269	0	0	0.137757	0.597451	0	0	0.599995	0.000311988	1
XPO1	ENSG00000082898	protein_coding	0	0	0.19465	0.0268484	0	0	0.843709	2.96073e-12	1	0	0.746181	5.61571e-15	1
LINC01587	ENSG00000082929	processed_transcript	0	0	NA	NA	0	0	-2.58625	NA	0	0	NA	NA	0
RNF13	ENSG00000082996	protein_coding	0	0	-0.0669521	0.884004	0	0	0.539322	0.367681	0	0	0.210344	0.657666	0
TRPM3	ENSG00000083067	protein_coding	0	0	0.163986	NA	0	0	-0.027693	NA	0	0	-1.4582	0.515662	0
PALB2	ENSG00000083093	protein_coding	0	0	-0.499173	0.152444	0	0	0.529953	0.446838	0	0	0.339135	0.53986	0
DOPEY1	ENSG00000083097	protein_coding	0	0	-0.179742	0.73896	0	0	0.944095	0.214188	0	0	1.4401	0.0252822	1
LYRM2	ENSG00000083099	protein_coding	0	0	0.104721	0.781622	0	0	0.943356	0.0355019	1	0	0.647621	0.070473	0
BCKDHB	ENSG00000083123	protein_coding	0	0	-0.170563	0.803739	0	0	0.481818	0.646874	0	0	0.593126	0.466853	0
KAT6A	ENSG00000083168	protein_coding	0	0	0.163648	0.486445	0	0	0.609949	0.0310864	1	0	0.860211	0.000159192	1
ZCCHC6	ENSG00000083223	protein_coding	0	0	-0.183141	0.438883	0	0	-0.0430888	0.928705	0	0	0.512978	0.0576203	0
ULK2	ENSG00000083290	protein_coding	0	0	-0.272479	0.663903	0	0	0.144977	0.901412	0	0	-0.24116	0.746315	0
GRHL2	ENSG00000083307	protein_coding	0	0	-0.833151	NA	0	0	0.380163	NA	0	0	-0.48692	NA	0
TNPO1	ENSG00000083312	protein_coding	1	0	0.468497	2.78722e-09	1	0	1.10867	6.4576e-21	1	0	1.13102	1.66852e-26	1
PLOD1	ENSG00000083444	protein_coding	0	0	-0.109153	0.516061	0	0	-0.298736	0.175453	0	0	-0.234018	0.1603	0
P2RX5	ENSG00000083454	protein_coding	0	0	0.483402	NA	0	0	0.692685	NA	0	0	0.469435	NA	0
ITGAE	ENSG00000083457	protein_coding	0	0	-0.207165	0.795324	0	0	-0.688033	0.44447	0	0	-1.06668	0.0536423	0
DIS3	ENSG00000083520	protein_coding	1	0	0.897355	2.36038e-09	1	0	1.49856	1.28741e-10	1	0	1.80905	2.77249e-16	1
PIBF1	ENSG00000083535	protein_coding	0	0	-0.564487	0.139494	0	0	-0.138551	0.880795	0	0	0.243816	0.721206	0
TDRD3	ENSG00000083544	protein_coding	0	0	-0.128507	0.800187	0	0	0.317264	0.669735	0	0	0.537492	0.313447	0
AC000111.6	ENSG00000083622	antisense	0	0	NA	NA	0	0	NA	NA	0	0	NA	NA	0
NUFIP1	ENSG00000083635	protein_coding	0	0	0.408709	0.476629	0	0	0.105249	0.919163	0	0	0.849775	0.207681	0
PDS5B	ENSG00000083642	protein_coding	1	0	0.343015	0.0219586	1	0	1.08669	9.76368e-08	1	0	0.985327	9.43687e-08	1
OXCT1	ENSG00000083720	protein_coding	1	0	0.617475	1.94132e-05	1	0	0.935637	0.000161022	1	0	1.42611	2.0749e-12	1
RRAGB	ENSG00000083750	protein_coding	0	0	-0.718378	0.194127	0	0	-1.124	0.106538	0	0	-0.932595	0.110589	0
EPYC	ENSG00000083782	protein_coding	0	0	0.604634	NA	0	0	0.380163	NA	0	0	-1.89224	NA	0
CYLD	ENSG00000083799	protein_coding	0	0	-0.153643	0.60999	0	0	1.16803	0.00178769	1	0	1.05354	0.00116665	1
SLC27A5	ENSG00000083807	protein_coding	0	0	-0.581721	NA	0	0	-2.87142	0.0607502	0	0	-2.32905	0.19327	0
ZNF324	ENSG00000083812	protein_coding	0	0	0.0828349	0.939699	0	0	-0.206964	0.888218	0	0	0.0823259	0.942793	0
ZNF671	ENSG00000083814	protein_coding	0	0	0.310535	0.710098	0	0	0.355569	0.8104	0	0	0.12864	0.896706	0
ZNF416	ENSG00000083817	protein_coding	0	0	-0.0923885	0.918134	0	0	0.418109	0.756455	0	0	0.459761	0.637335	0
ZNF586	ENSG00000083828	protein_coding	0	0	0.0245524	0.98046	0	0	0.0444891	0.975208	0	0	0.397494	0.710126	0
ZNF446	ENSG00000083838	protein_coding	0	0	-1.40726	0.210589	0	0	-0.41934	0.869766	0	0	-0.851612	0.621904	0
ZNF264	ENSG00000083844	protein_coding	0	0	0.00198669	0.996673	0	0	0.565893	0.20562	0	0	-0.0196548	0.962014	0
RPS5	ENSG00000083845	protein_coding	0	0	-0.28599	0.0201152	0	0	-0.764453	5.87975e-08	0	1	-0.220673	0.590039	0
FAT1	ENSG00000083857	protein_coding	1	0	0.391548	1.55066e-05	1	0	0.55611	2.76402e-06	1	0	0.942955	6.09211e-20	1
YTHDC1	ENSG00000083896	protein_coding	0	0	0.199516	0.777453	0	0	1.05609	0.269341	0	0	0.232041	0.8764	0
CHMP2B	ENSG00000083937	protein_coding	0	0	0.183545	0.511899	0	0	0.747095	0.0258747	1	0	1.01815	0.000242883	1
SMAP2	ENSG00000084070	protein_coding	0	0	0.316548	0.374971	0	0	0.189049	0.768391	0	0	-0.137842	0.747019	0
PPIE	ENSG00000084072	protein_coding	0	0	0.10895	0.736573	0	0	0.240723	0.63586	0	0	0.0284327	0.93977	0
ZMPSTE24	ENSG00000084073	protein_coding	1	0	0.786074	8.3911e-08	1	0	0.958017	4.74693e-06	1	0	0.737599	2.54665e-05	1
STARD7	ENSG00000084090	protein_coding	1	0	0.98812	4.71741e-25	1	0	1.11144	1.24088e-16	1	0	0.98961	6.40287e-17	1
NOA1	ENSG00000084092	protein_coding	0	0	-0.176231	0.406758	0	0	0.457912	0.1306	0	0	0.368551	0.130158	0
REST	ENSG00000084093	protein_coding	0	0	-0.0130071	0.949663	0	0	1.27052	1.76579e-13	1	0	1.57836	8.85836e-23	1
HAL	ENSG00000084110	protein_coding	0	0	-0.25589	NA	0	0	0.547175	NA	0	0	-1.35059	NA	0
SSH1	ENSG00000084112	protein_coding	0	0	0.181951	0.618197	0	0	0.29047	0.279337	0	0	-0.0328622	0.896307	0
GSTP1	ENSG00000084207	protein_coding	0	1	-0.359028	0.000318592	0	1	-0.618069	1.47971e-05	0	1	-0.434215	0.000265105	0
APLP2	ENSG00000084234	protein_coding	1	0	0.666293	1.73793e-18	1	0	1.23974	1.57638e-29	1	0	1.43626	7.95427e-41	1
FAM234B	ENSG00000084444	protein_coding	0	0	0.217482	0.649871	0	0	0.214497	0.779005	0	0	-0.0672581	0.902615	0
SLCO1A2	ENSG00000084453	protein_coding	0	0	-0.298696	0.86279	0	0	-0.109793	0.966614	0	0	2.28533	0.45694	0
WBP11	ENSG00000084463	protein_coding	0	0	0.290854	0.0396409	0	0	0.0964175	0.734118	0	0	0.453883	0.00506781	1
EIF3I	ENSG00000084623	protein_coding	0	0	-0.412423	0.000221459	0	1	0.141905	0.582663	0	0	0.156311	0.380118	0
NKAIN1	ENSG00000084628	protein_coding	0	0	3.17926	NA	0	0	0.0145336	NA	0	0	-0.838333	NA	0
COL16A1	ENSG00000084636	protein_coding	0	1	-0.661946	1.41449e-08	0	1	-0.859777	3.26431e-06	0	1	-0.800664	2.98078e-09	0
TXLNA	ENSG00000084652	protein_coding	1	0	0.858274	4.64049e-18	1	0	0.899977	1.05491e-09	1	0	0.906455	9.11357e-13	1
APOB	ENSG00000084674	protein_coding	0	0	2.60016	NA	0	0	0.884781	NA	0	0	-2.62029	0.269383	0
NCOA1	ENSG00000084676	protein_coding	0	0	-0.13664	0.605379	0	0	0.131545	0.784053	0	0	0.325491	0.253683	0
AGBL5	ENSG00000084693	protein_coding	0	1	-0.647873	0.000155954	0	1	-0.79077	0.0012854	0	1	-0.784376	5.95132e-05	0
EFR3B	ENSG00000084710	protein_coding	0	0	1.00697	0.033015	1	0	0.381341	0.649977	0	0	0.588042	0.334391	0
KIF3C	ENSG00000084731	protein_coding	0	0	0.0228872	0.936431	0	0	0.205019	0.536106	0	0	0.178606	0.495576	0
RAB10	ENSG00000084733	protein_coding	0	0	0.175336	0.187968	0	0	0.4991	0.00423412	1	0	0.230326	0.151789	0
GCKR	ENSG00000084734	protein_coding	0	0	-2.28029	NA	0	0	NA	NA	0	0	-3.33993	NA	0
HADHA	ENSG00000084754	protein_coding	0	0	-0.0850296	0.490128	0	0	0.555681	1.95904e-05	1	0	0.749303	1.27403e-11	1
MAPRE3	ENSG00000084764	protein_coding	0	0	-0.667559	0.100509	0	0	-0.256717	0.779645	0	0	-0.439908	0.431268	0
CAD	ENSG00000084774	protein_coding	0	0	0.417093	0.000959952	1	0	0.116198	0.649477	0	0	0.199492	0.241321	0
CD59	ENSG00000085063	protein_coding	0	0	-0.112309	0.534055	0	0	0.184156	0.518658	0	0	0.18963	0.362637	0
CD82	ENSG00000085117	protein_coding	0	0	0.06451	0.94078	0	0	0.151875	0.907462	0	0	-0.051364	0.956436	0
BCORL1	ENSG00000085185	protein_coding	0	0	0.776486	0.0114727	1	0	0.0899386	0.886153	0	0	-0.188113	0.614047	0
ATRX	ENSG00000085224	protein_coding	0	0	0.273859	0.0145063	0	0	0.882192	1.22213e-08	1	0	1.02289	1.87181e-15	1
AK6	ENSG00000085231	protein_coding	0	0	NA	NA	0	0	NA	NA	0	0	NA	NA	0
FCN1	ENSG00000085265	protein_coding	0	0	NA	NA	0	0	NA	NA	0	0	NA	NA	0
MYNN	ENSG00000085274	protein_coding	0	0	-0.328247	0.534568	0	0	-0.104259	0.919463	0	0	0.233655	0.765593	0
MECOM	ENSG00000085276	protein_coding	0	0	0.0196333	0.961872	0	0	1.15803	0.00107298	1	0	1.36023	1.41797e-05	1
SCAMP1	ENSG00000085365	protein_coding	0	0	0.118974	0.618132	0	0	0.900712	0.00149383	1	0	0.95596	4.0552e-05	1
PREP	ENSG00000085377	protein_coding	0	0	0.427805	0.035529	1	0	0.612469	0.0546259	0	0	0.329692	0.217188	0
HACE1	ENSG00000085382	protein_coding	0	0	-0.0903373	0.858372	0	0	0.282532	0.698479	0	0	-0.00340977	0.994733	0
SEH1L	ENSG00000085415	protein_coding	1	0	0.39309	0.000950585	1	0	0.566149	0.00200069	1	0	0.389199	0.00861669	1
WDR47	ENSG00000085433	protein_coding	0	0	0.796706	0.00196143	1	0	0.566589	0.188348	0	0	0.661557	0.0445216	1
WDFY1	ENSG00000085449	protein_coding	0	0	0.145133	0.443868	0	0	0.53631	0.0265745	1	0	0.333974	0.113019	0
OVGP1	ENSG00000085465	protein_coding	0	0	-1.00969	NA	0	0	1.00284	NA	0	0	-1.86701	0.324298	0
SLC25A24	ENSG00000085491	protein_coding	1	0	0.988351	2.90253e-08	1	0	1.45261	4.24932e-07	1	0	1.50705	4.58142e-11	1
MAP3K4	ENSG00000085511	protein_coding	1	0	0.434849	0.000994694	1	0	0.735897	0.000345186	1	0	1.08353	2.36111e-10	1
PILRA	ENSG00000085514	protein_coding	0	0	-0.271703	NA	0	0	-3.47293	0.070417	0	0	-3.51276	0.0528055	0
IGSF9	ENSG00000085552	protein_coding	0	0	0.105083	0.874317	0	0	-0.795459	0.165482	0	0	-0.829539	0.0487671	0
ABCB1	ENSG00000085563	protein_coding	0	0	0.0527466	0.937809	0	0	0.235494	0.799347	0	0	1.01144	0.112129	0
ZNF213	ENSG00000085644	protein_coding	0	0	-0.704071	0.0735029	0	0	-0.0556013	0.957169	0	0	-0.900274	0.0327093	0
AKR1B1	ENSG00000085662	protein_coding	0	0	-0.0355647	0.879677	0	0	0.0321744	0.931251	0	0	0.075364	0.755805	0
CPNE3	ENSG00000085719	protein_coding	1	0	0.67254	5.26705e-10	1	0	1.24148	3.46399e-12	1	0	1.11565	1.34277e-14	1
RRN3	ENSG00000085721	protein_coding	0	0	0.886499	0.252214	0	0	2.7937	0.0298087	1	0	4.25008	0.0270295	1
CTTN	ENSG00000085733	protein_coding	0	0	0.183888	0.183312	0	0	0.101096	0.693713	0	0	0.313705	0.0417778	1
WNT11	ENSG00000085741	protein_coding	0	0	0.774127	0.444634	0	0	0.665777	0.679073	0	0	0.882697	0.497859	0
MTIF2	ENSG00000085760	protein_coding	0	0	0.165657	0.339887	0	0	1.13596	2.39285e-07	1	0	1.19289	4.13243e-10	1
DDHD2	ENSG00000085788	protein_coding	1	0	0.649968	5.45627e-05	1	0	1.24485	1.05805e-06	1	0	1.25712	6.83481e-09	1
TTC39A	ENSG00000085831	protein_coding	0	0	-0.308894	0.629487	0	0	-0.274114	0.796423	0	0	-0.103587	0.906182	0
EPS15	ENSG00000085832	protein_coding	0	0	-0.314536	0.0246965	0	1	0.309541	0.233472	0	0	0.564329	0.00245944	1
ORC1	ENSG00000085840	protein_coding	0	0	0.772324	0.000279439	1	0	0.378248	0.313148	0	0	0.587889	0.0307259	1
MGST2	ENSG00000085871	protein_coding	0	0	-0.260007	0.761229	0	0	-1.10968	0.148044	0	0	-0.678364	0.386426	0
CHERP	ENSG00000085872	protein_coding	0	0	0.479904	0.107356	0	0	0.0986855	0.871774	0	0	0.254459	0.511204	0
ATG16L1	ENSG00000085978	protein_coding	0	0	NA	NA	0	0	NA	NA	0	0	NA	NA	0
USP40	ENSG00000085982	protein_coding	0	0	0.0841201	0.766541	0	0	0.654963	0.0435523	1	0	0.750118	0.00402415	1
POMGNT1	ENSG00000085998	protein_coding	0	0	0.243137	0.284298	0	0	0.249854	0.506296	0	0	0.109889	0.715857	0
RAD54L	ENSG00000085999	protein_coding	0	0	0.237381	0.590734	0	0	-0.557277	0.251887	0	0	-0.941356	0.00255944	0
MAST2	ENSG00000086015	protein_coding	0	0	-0.197903	0.232984	0	0	-0.285563	0.276981	0	0	-0.0542828	0.824609	0
DNAJA1	ENSG00000086061	protein_coding	1	0	1.28728	5.17076e-53	1	0	0.549673	8.3344e-06	1	0	0.67986	2.6172e-12	1
B4GALT1	ENSG00000086062	protein_coding	0	0	-0.327901	0.0120632	0	1	0.544371	0.00642659	1	0	0.0774423	0.710896	0
CHMP5	ENSG00000086065	protein_coding	0	0	0.135288	0.487711	0	0	0.992428	1.31043e-05	1	0	1.15291	7.47605e-09	1
NFX1	ENSG00000086102	protein_coding	0	0	-0.262223	0.196291	0	0	-0.0936824	0.834003	0	0	-0.043446	0.892633	0
AQP6	ENSG00000086159	protein_coding	0	0	2.19096	NA	0	0	-2.93204	0.238268	0	0	-3.19824	0.146181	0
DIMT1	ENSG00000086189	protein_coding	0	0	-0.200247	0.495088	0	0	0.305853	0.540513	0	0	0.37494	0.307693	0
IPO11	ENSG00000086200	protein_coding	0	0	0.296519	0.222137	0	0	0.878811	0.0110286	1	0	0.765158	0.00579699	1
FOLH1	ENSG00000086205	protein_coding	0	0	0.747627	0.604352	0	0	0.877108	0.68514	0	0	0.974735	0.59924	0
EIF2AK1	ENSG00000086232	protein_coding	0	0	0.163225	0.189974	0	0	0.248125	0.171328	0	0	0.183011	0.213942	0
NME8	ENSG00000086288	protein_coding	0	0	-2.29695	NA	0	0	NA	NA	0	0	NA	NA	0
EPDR1	ENSG00000086289	protein_coding	1	0	1.38434	5.02661e-07	1	0	0.929006	0.026498	1	0	0.878256	0.00856789	1
SNX10	ENSG00000086300	protein_coding	0	0	-0.286162	0.604416	0	0	0.608056	0.503594	0	0	0.391145	0.581577	0
SEPHS1	ENSG00000086475	protein_coding	1	0	0.740155	1.05425e-10	1	0	1.26486	2.2722e-13	1	0	1.51427	1.3323e-20	1
MRPL28	ENSG00000086504	protein_coding	0	0	0.0681649	0.839238	0	0	0.0613352	0.908973	0	0	0.35004	0.264015	0
HBQ1	ENSG00000086506	protein_coding	0	0	0.604634	NA	0	0	-1.13334	NA	0	0	-1.89224	NA	0
ITPKC	ENSG00000086544	protein_coding	0	0	0.349319	0.356614	0	0	1.25132	0.0172347	1	0	0.558493	0.203404	0
CEACAM6	ENSG00000086548	protein_coding	0	0	NA	NA	0	0	NA	NA	0	0	NA	NA	0
FAT2	ENSG00000086570	protein_coding	0	0	-0.0926842	NA	0	0	-1.2731	NA	0	0	-2.16771	0.328388	0
RBM22	ENSG00000086589	protein_coding	0	0	0.444005	0.0342474	1	0	0.219526	0.588769	0	0	0.21398	0.448461	0
TMED2	ENSG00000086598	protein_coding	1	0	0.382153	0.000157923	1	0	0.818436	9.46016e-07	1	0	0.569315	5.19327e-06	1
ERO1B	ENSG00000086619	protein_coding	0	0	-0.405204	0.502555	0	0	-0.150606	0.899319	0	0	0.0609513	0.94561	0
ZFAND6	ENSG00000086666	protein_coding	0	0	-0.273796	0.18031	0	0	0.257367	0.509532	0	0	-0.09516	0.756014	0
HSD17B2	ENSG00000086696	protein_coding	0	0	-3.30014	NA	0	0	-5.09616	NA	0	0	-6.38051	0.00786588	0
TXLNG	ENSG00000086712	protein_coding	0	0	0.0733367	0.871366	0	0	0.505539	0.351052	0	0	0.590284	0.115427	0
PPEF1	ENSG00000086717	protein_coding	0	0	-0.839461	NA	0	0	0.375627	NA	0	0	-0.493993	NA	0
LAT2	ENSG00000086730	protein_coding	0	0	-0.530789	0.0430718	0	1	-0.0883315	0.891224	0	0	0.157799	0.718759	0
HUWE1	ENSG00000086758	protein_coding	0	0	-0.248107	0.0060503	0	0	0.263925	0.045116	0	0	0.675185	6.57498e-12	1
ZW10	ENSG00000086827	protein_coding	0	0	0.5391	0.000300044	1	0	0.394124	0.111461	0	0	0.676033	0.000382074	1
ALG9	ENSG00000086848	protein_coding	0	0	-0.0911328	0.858372	0	0	0.170646	0.828428	0	0	0.140102	0.797634	0
MYBPC2	ENSG00000086967	protein_coding	0	0	-3.30014	NA	0	0	-2.58625	NA	0	0	-5.00223	NA	0
NOX4	ENSG00000086991	protein_coding	0	0	-0.54186	0.275159	0	0	-0.331006	0.732719	0	0	-0.300862	0.660526	0
ACOX3	ENSG00000087008	protein_coding	0	0	-0.52137	0.171295	0	0	-0.221445	0.786345	0	0	-0.712499	0.0752343	0
MTMR2	ENSG00000087053	protein_coding	0	0	-0.0254091	0.911551	0	0	0.389689	0.0989992	0	0	0.440701	0.00769609	1
PPP1R15A	ENSG00000087074	protein_coding	0	1	-0.769797	0.000245891	0	1	-0.688007	0.000231814	0	1	-0.065715	0.774495	0
HSD17B14	ENSG00000087076	protein_coding	0	0	-1.12509	0.0791077	0	0	-0.932411	0.393662	0	0	-0.416649	0.716251	0
TRIP6	ENSG00000087077	protein_coding	0	0	0.164171	0.363951	0	0	-0.113321	0.733714	0	0	-0.300279	0.0879844	0
ACHE	ENSG00000087085	protein_coding	0	0	0.476911	0.526444	0	0	-0.425734	0.674313	0	0	-1.31676	0.00420999	0
FTL	ENSG00000087086	protein_coding	0	1	-0.32902	0.000363547	0	1	-1.6819	9.88728e-74	0	1	-1.64763	7.65796e-83	0
SRRT	ENSG00000087087	protein_coding	0	0	0.967626	2.23046e-14	1	0	-0.0337738	0.913404	0	0	0.432513	0.00691101	1
BAX	ENSG00000087088	protein_coding	0	0	-0.0100922	0.974873	0	0	-0.519794	0.0447937	0	1	-0.896204	2.25543e-07	0
NLK	ENSG00000087095	protein_coding	0	0	0.1221	0.739831	0	0	0.452729	0.346924	0	0	-0.437202	0.134402	0
PIGS	ENSG00000087111	protein_coding	0	0	0.16362	0.483686	0	0	0.403135	0.222561	0	0	-0.671653	0.000122146	0
ADAMTS2	ENSG00000087116	protein_coding	0	0	0.188453	0.858343	0	0	0.234986	0.796783	0	0	0.431278	0.487605	0
TMPRSS11E	ENSG00000087128	protein_coding	0	0	NA	NA	0	0	NA	NA	0	0	NA	NA	0
ATXN7L3	ENSG00000087152	protein_coding	0	0	0.228968	0.129736	0	0	0.578769	0.00342231	1	0	0.436248	0.00829427	1
PGS1	ENSG00000087157	protein_coding	0	0	0.131151	0.779604	0	0	-0.319666	0.569272	0	0	-0.660009	0.0361834	0
PSMC5	ENSG00000087191	protein_coding	0	0	0.0636822	0.868576	0	0	0.0798689	0.824821	0	0	0.461204	0.0182484	1
UIMC1	ENSG00000087206	protein_coding	0	0	0.201709	0.39428	0	0	0.533311	0.125439	0	0	0.795061	0.00258574	1
CETP	ENSG00000087237	protein_coding	0	0	0.598342	NA	0	0	0.375627	NA	0	0	-0.493993	NA	0
MMP2	ENSG00000087245	protein_coding	0	0	-0.344104	0.0044712	0	1	0.0497745	0.875172	0	0	0.217087	0.232383	0
MT3	ENSG00000087250	protein_coding	0	0	NA	NA	0	0	NA	NA	0	0	NA	NA	0
LPCAT2	ENSG00000087253	protein_coding	0	0	0.265916	NA	0	0	0.0733181	0.982089	0	0	-0.645272	0.79156	0
GNAO1	ENSG00000087258	protein_coding	0	0	-0.407703	0.194711	0	0	-0.0601089	0.937656	0	0	-0.364499	0.34218	0
OGFOD1	ENSG00000087263	protein_coding	0	0	0.0293299	0.937081	0	0	0.467668	0.256746	0	0	0.420335	0.176086	0
SH3BP2	ENSG00000087266	protein_coding	0	0	-0.809012	0.00148078	0	1	-0.239173	0.696629	0	0	-0.47421	0.184117	0
NOP14	ENSG00000087269	protein_coding	0	0	0.0768168	0.847172	0	0	0.145566	0.806627	0	0	0.446153	0.222588	0
ADD1	ENSG00000087274	protein_coding	0	0	0.151108	0.308809	0	0	0.665089	0.000210029	1	0	0.397609	0.249274	0
L2HGDH	ENSG00000087299	protein_coding	0	0	0.359664	0.142637	0	0	0.639195	0.0764179	0	0	1.09545	0.000213881	1
TXNDC16	ENSG00000087301	protein_coding	0	0	0.262057	0.671466	0	0	0.455789	0.615526	0	0	0.715383	0.286954	0
C14orf166	ENSG00000087302	protein_coding	0	0	0.0229152	0.920536	0	0	0.253013	0.326009	0	0	0.55253	0.00156192	1
NID2	ENSG00000087303	protein_coding	0	0	0.690915	0.63394	0	0	-0.773458	0.608381	0	0	-0.555854	0.679823	0
GMCL1	ENSG00000087338	protein_coding	0	0	0.0850867	0.752887	0	0	0.991195	0.00167508	1	0	1.19054	4.61297e-06	1
SF3B2	ENSG00000087365	protein_coding	1	0	0.482447	3.8451e-08	1	0	0.765287	1.05491e-09	1	0	1.16355	4.32015e-24	1
KLHL42	ENSG00000087448	protein_coding	0	0	0.108433	0.749096	0	0	0.481029	0.277709	0	0	0.0554725	0.888365	0
GNAS	ENSG00000087460	protein_coding	0	0	-0.267641	0.00023388	0	0	-0.263355	0.00795466	0	0	0.193753	0.054244	0
DNM1L	ENSG00000087470	protein_coding	0	0	-0.0709052	0.71448	0	0	0.311704	0.217796	0	0	0.249521	0.196001	0
PTHLH	ENSG00000087494	protein_coding	0	0	0.135017	0.888052	0	0	0.451975	0.75584	0	0	0.123498	0.908351	0
PHACTR3	ENSG00000087495	protein_coding	0	0	1.74483	0.0422369	1	0	2.17941	0.0892336	0	0	1.78266	0.131215	0
ERGIC2	ENSG00000087502	protein_coding	0	0	0.442522	0.0413114	1	0	0.584039	0.081504	0	0	1.15408	3.95423e-05	1
TFAP2C	ENSG00000087510	protein_coding	0	0	0.604634	NA	0	0	0.380163	NA	0	0	-0.48692	NA	0
AURKA	ENSG00000087586	protein_coding	0	0	0.605919	1.81339e-07	1	0	0.181758	0.450519	0	0	0.327515	0.0289866	1
CASS4	ENSG00000087589	protein_coding	0	0	1.14314	NA	0	0	-1.34029	NA	0	0	1.50135	NA	0
PIR	ENSG00000087842	protein_coding	0	0	0.835776	0.0932963	0	0	0.148899	0.881349	0	0	0.738345	0.25922	0
AAMDC	ENSG00000087884	protein_coding	0	0	-0.783219	0.449259	0	0	-0.713394	0.67671	0	0	-1.36906	0.164394	0
RFX2	ENSG00000087903	protein_coding	0	0	-0.125129	0.831123	0	0	-0.471198	0.482206	0	0	0.0514101	0.941471	0
METTL2A	ENSG00000087995	protein_coding	0	0	-0.00358229	0.991519	0	0	0.626538	0.0662731	0	0	0.417224	0.132054	0
SULT2B1	ENSG00000088002	protein_coding	0	0	-0.839461	NA	0	0	-2.6831	NA	0	0	-2.94	NA	0
ALG6	ENSG00000088035	protein_coding	0	0	0.0834297	0.897765	0	0	-0.0576292	0.952745	0	0	-0.694924	0.106848	0
CNOT3	ENSG00000088038	protein_coding	0	0	-0.842498	0.214762	0	0	-1.38476	0.0870405	0	0	-1.42088	0.0265265	0
GP6	ENSG00000088053	protein_coding	0	0	NA	NA	0	0	NA	NA	0	0	NA	NA	0
PTPN4	ENSG00000088179	protein_coding	0	0	-0.476137	0.0217718	0	1	-0.0538207	0.928253	0	0	-0.123192	0.720635	0
DDX18	ENSG00000088205	protein_coding	1	0	0.598622	1.02359e-10	1	0	1.26818	1.89023e-18	1	0	1.10135	1.63996e-19	1
KHSRP	ENSG00000088247	protein_coding	0	0	0.477209	2.35022e-06	1	0	0.100259	0.643415	0	0	0.0064817	0.975067	0
GNA11	ENSG00000088256	protein_coding	0	0	0.432797	0.0431646	1	0	0.447569	0.225219	0	0	0.521379	0.0474176	1
ASAP3	ENSG00000088280	protein_coding	0	0	NA	NA	0	0	NA	NA	0	0	NA	NA	0
EDEM2	ENSG00000088298	protein_coding	0	0	0.17928	0.635252	0	0	0.129492	0.838751	0	0	0.132469	0.767765	0
DNMT3B	ENSG00000088305	protein_coding	0	0	0.861566	1.49311e-05	1	0	-0.122292	0.775557	0	0	0.0780823	0.800604	0
REM1	ENSG00000088320	protein_coding	0	0	-3.28518	NA	0	0	-4.18772	NA	0	0	-3.33993	NA	0
TPX2	ENSG00000088325	protein_coding	0	0	0.219099	0.0108889	0	0	0.0581515	0.761356	0	0	0.409538	4.74925e-05	1
FER1L4	ENSG00000088340	transcribed_unitary_pseudogene	0	0	-0.0518392	0.975581	0	0	-1.72706	0.0781337	0	0	-1.9294	0.0094348	0
PDRG1	ENSG00000088356	protein_coding	0	0	-0.117485	0.709808	0	0	0.0527994	0.927884	0	0	-0.295671	0.318248	0
EPB41L1	ENSG00000088367	protein_coding	0	0	0.31131	0.0851918	0	0	0.0459684	0.910409	0	0	0.182408	0.445081	0
SLC15A1	ENSG00000088386	protein_coding	0	0	-2.28029	NA	0	0	NA	NA	0	0	NA	NA	0
DOCK9	ENSG00000088387	protein_coding	0	0	-0.213367	0.610638	0	0	0.663426	0.287093	0	0	0.481286	0.32912	0
ANKRD10	ENSG00000088448	protein_coding	0	1	-0.741381	0.00238042	0	1	-0.903404	0.0102791	0	1	-0.916104	0.000733877	0
TGDS	ENSG00000088451	protein_coding	0	0	0.112831	0.825202	0	0	0.958028	0.117221	0	0	1.29637	0.0118951	1
DOCK3	ENSG00000088538	protein_coding	0	0	-0.370837	0.401417	0	0	-0.807912	0.115928	0	0	-0.884843	0.02211	0
C3orf18	ENSG00000088543	protein_coding	0	0	-0.132184	0.79423	0	0	0.730004	0.267577	0	0	0.356241	0.50731	0
COQ9	ENSG00000088682	protein_coding	0	0	-0.358396	0.156179	0	0	0.0917207	0.876384	0	0	0.347955	0.332711	0
TMEM40	ENSG00000088726	protein_coding	0	0	0.289406	NA	0	0	0.830929	NA	0	0	-0.518083	0.845336	0
KIF9	ENSG00000088727	protein_coding	0	0	-0.876928	0.209167	0	0	-0.806841	0.47305	0	0	-0.198456	0.879437	0
ARHGAP28	ENSG00000088756	protein_coding	0	0	0.0955897	0.747725	0	0	0.224832	0.646459	0	0	0.478603	0.0899279	0
CRLS1	ENSG00000088766	protein_coding	0	0	0.198394	0.515416	0	0	0.578327	0.142585	0	0	0.504706	0.107117	0
DEFB127	ENSG00000088782	protein_coding	0	0	NA	NA	0	0	NA	NA	0	0	NA	NA	0
PPP1R13B	ENSG00000088808	protein_coding	0	0	0.339159	0.531685	0	0	-0.326769	0.665531	0	0	-0.0585724	0.929566	0
ATRN	ENSG00000088812	protein_coding	0	0	0.030352	0.904192	0	0	0.637191	0.0084433	1	0	0.572443	0.00431513	1
SMOX	ENSG00000088826	protein_coding	0	0	-0.738701	0.0214708	0	1	-0.550814	0.344984	0	0	-0.40765	0.364832	0
SIGLEC1	ENSG00000088827	protein_coding	0	0	NA	NA	0	0	-3.41412	NA	0	0	-4.49154	NA	0
FKBP1A	ENSG00000088832	protein_coding	0	0	0.0830793	0.689242	0	0	-0.093359	0.781604	0	0	-0.756618	4.22836e-08	0
NSFL1C	ENSG00000088833	protein_coding	0	0	0.173183	0.391345	0	0	-0.0965636	0.796752	0	0	0.118176	0.649385	0
SLC4A11	ENSG00000088836	protein_coding	0	0	-0.353267	0.638703	0	0	-0.815779	0.36219	0	0	-0.886621	0.168607	0
C20orf194	ENSG00000088854	protein_coding	0	0	0.109397	0.837385	0	0	0.104253	0.900837	0	0	-0.105802	0.845491	0
ZNF343	ENSG00000088876	protein_coding	0	0	-0.101067	0.87636	0	0	0.293801	0.791878	0	0	0.655991	0.326077	0
EBF4	ENSG00000088881	protein_coding	0	0	-0.564633	0.714679	0	0	-0.157923	0.953824	0	0	-0.86746	0.600644	0
CPXM1	ENSG00000088882	protein_coding	0	0	NA	NA	0	0	NA	NA	0	0	NA	NA	0
MAVS	ENSG00000088888	protein_coding	0	0	-0.327222	0.0414567	0	1	0.221425	0.493654	0	0	-0.16	0.507967	0
LZTS3	ENSG00000088899	protein_coding	0	0	0.233071	0.401417	0	0	0.530316	0.168638	0	0	0.33592	0.285434	0
F11	ENSG00000088926	protein_coding	0	0	NA	NA	0	0	NA	NA	0	0	NA	NA	0
XRN2	ENSG00000088930	protein_coding	1	0	0.406993	2.64208e-05	1	0	0.989634	1.45343e-11	1	0	1.0754	1.61246e-17	1
KIZ	ENSG00000088970	protein_coding	0	0	-1.1705	0.000977309	0	1	-0.410999	0.645217	0	0	-0.331108	0.619799	0
DYNLL1	ENSG00000088986	protein_coding	0	0	0.0786706	0.718842	0	0	-0.594356	0.00385862	0	1	-0.242818	0.214952	0
TESC	ENSG00000088992	protein_coding	0	0	-0.642776	NA	0	0	-0.735222	0.842687	0	0	0.157264	NA	0
SNX5	ENSG00000089006	protein_coding	0	0	0.0485482	0.814887	0	0	0.150283	0.622127	0	0	-0.11504	0.578095	0
RPL6	ENSG00000089009	protein_coding	0	0	0.0369872	0.79423	0	0	-0.159041	0.277759	0	0	0.363657	0.000491255	1
SIRPG	ENSG00000089012	protein_coding	0	0	NA	NA	0	0	NA	NA	0	0	NA	NA	0
MAPKAPK5	ENSG00000089022	protein_coding	0	0	-0.00535151	0.988855	0	0	0.5532	0.179638	0	0	0.605256	0.0582038	0
P2RX7	ENSG00000089041	protein_coding	0	0	0.729197	NA	0	0	0.592754	NA	0	0	0.1454	NA	0
ESF1	ENSG00000089048	protein_coding	0	0	0.29242	0.157434	0	0	1.07876	0.000459728	1	0	1.91504	2.40388e-11	1
RBBP9	ENSG00000089050	protein_coding	0	0	-0.225432	0.433233	0	0	0.580805	0.198474	0	0	0.0375039	0.929973	0
ANAPC5	ENSG00000089053	protein_coding	0	0	0.394833	0.0142534	1	0	0.109209	0.749033	0	0	0.0485207	0.845823	0
SLC23A2	ENSG00000089057	protein_coding	0	0	0.260707	0.338881	0	0	-0.052479	0.922043	0	0	-0.0384217	0.916004	0
SLC8B1	ENSG00000089060	protein_coding	0	0	-0.234162	0.600475	0	0	-0.284027	0.659306	0	0	-0.338125	0.420729	0
TMEM230	ENSG00000089063	protein_coding	0	0	-0.120429	0.654573	0	0	-0.170582	0.687914	0	0	-0.326492	0.209481	0
DZANK1	ENSG00000089091	protein_coding	0	0	-0.474729	0.571505	0	0	-0.205373	0.895151	0	0	-0.356857	0.750136	0
KDM2B	ENSG00000089094	protein_coding	0	0	0.520082	0.0441286	1	0	0.34662	0.467656	0	0	0.321084	0.320864	0
CFAP61	ENSG00000089101	protein_coding	0	0	-3.87497	NA	0	0	-2.47761	NA	0	0	-4.38142	NA	0
LHX5	ENSG00000089116	protein_coding	0	0	-0.401593	0.797881	0	0	0.594909	0.829496	0	0	0.348196	0.885212	0
TASP1	ENSG00000089123	protein_coding	0	0	0.0528263	0.943339	0	0	-0.0797671	0.942449	0	0	-0.0397137	0.957952	0
OAS1	ENSG00000089127	protein_coding	0	0	1.1621	NA	0	0	1.52011	NA	0	0	0.651601	0.844547	0
GCN1	ENSG00000089154	protein_coding	0	0	0.133788	0.316572	0	0	-0.0205594	0.942749	0	0	0.00309548	0.986861	0
RPLP0	ENSG00000089157	protein_coding	0	0	-0.277887	0.000365962	0	0	-0.508305	2.06859e-08	0	1	-0.342787	0.00182514	0
PXN	ENSG00000089159	protein_coding	0	0	0.389576	0.036896	1	0	0.355205	0.239499	0	0	-0.13428	0.573688	0
SIRT4	ENSG00000089163	protein_coding	0	0	0.837335	NA	0	0	0.933289	0.755448	0	0	1.06534	0.711954	0
RPH3A	ENSG00000089169	protein_coding	0	0	-4.2852	NA	0	0	-2.58625	NA	0	0	NA	NA	0
KIF16B	ENSG00000089177	protein_coding	0	0	0.545606	0.066791	0	0	0.269567	0.620093	0	0	0.472662	0.216949	0
TRMT6	ENSG00000089195	protein_coding	0	0	0.26534	0.294702	0	0	0.663064	0.0588619	0	0	0.539555	0.0509447	0
CHGB	ENSG00000089199	protein_coding	0	0	0.59396	0.753562	0	0	-0.830289	0.658389	0	0	1.37854	0.61845	0
PEBP1	ENSG00000089220	protein_coding	0	0	0.300755	0.0479227	1	0	0.390582	0.104723	0	0	0.375509	0.0384063	1
TBX5	ENSG00000089225	protein_coding	0	0	4.99381	NA	0	0	-0.171077	0.953265	0	0	-0.316067	0.868544	0
BRAP	ENSG00000089234	protein_coding	0	0	-0.286352	0.315902	0	0	0.380815	0.452476	0	0	0.343985	0.359795	0
ERP29	ENSG00000089248	protein_coding	0	0	-0.752282	4.03391e-10	0	1	0.167925	0.637418	0	0	0.41459	0.0350363	1
NOS1	ENSG00000089250	protein_coding	0	0	0.0739985	0.961785	0	0	-0.279999	0.878589	0	0	-0.841681	0.413844	0
FUS	ENSG00000089280	protein_coding	0	0	0.338578	0.00070804	1	0	-0.120231	0.547074	0	0	0.287868	0.0316516	0
IGBP1	ENSG00000089289	protein_coding	0	0	0.00848573	0.982587	0	0	0.192861	0.697482	0	0	0.367376	0.667524	0
FXYD5	ENSG00000089327	protein_coding	0	0	-0.474703	0.0543143	0	0	-1.39665	2.14258e-08	0	1	-0.900301	0.000143051	0
ZNF302	ENSG00000089335	protein_coding	0	0	0.00575317	0.989753	0	0	0.355702	0.517338	0	0	0.374904	0.350714	0
GRAMD1A	ENSG00000089351	protein_coding	0	0	-0.260994	0.262114	0	0	-0.343854	0.332459	0	0	-0.315258	0.227877	0
FXYD3	ENSG00000089356	protein_coding	0	0	-0.849832	NA	0	0	-1.13334	NA	0	0	-0.48692	NA	0
HEPH	ENSG00000089472	protein_coding	0	0	0.519813	0.792467	0	0	0.7658	0.788974	0	0	1.30118	0.650933	0
CDIP1	ENSG00000089486	protein_coding	0	0	-1.13402	0.441367	0	0	-1.99938	0.158091	0	0	-0.190312	0.9445	0
CMTM1	ENSG00000089505	protein_coding	0	0	0.358351	0.691672	0	0	-0.290527	0.82317	0	0	0.597635	0.570178	0
KCNH4	ENSG00000089558	protein_coding	0	0	0.604634	NA	0	0	0.380163	NA	0	0	-2.02209	NA	0
GANAB	ENSG00000089597	protein_coding	0	0	-0.144597	0.139985	0	0	0.130988	0.413993	0	0	-0.200164	0.071072	0
GMIP	ENSG00000089639	protein_coding	0	0	0.156495	0.869396	0	0	0.0143631	0.991477	0	0	-0.374611	0.657399	0
RBM41	ENSG00000089682	protein_coding	0	0	0.0861065	0.905787	0	0	0.28873	0.789219	0	0	0.195907	0.79474	0
BIRC5	ENSG00000089685	protein_coding	1	0	0.569461	3.6338e-11	1	0	0.598626	3.36866e-06	1	0	0.340341	0.00253749	1
LAG3	ENSG00000089692	protein_coding	0	0	-0.649369	NA	0	0	-2.05807	0.250191	0	0	-1.42403	0.564848	0
MLF2	ENSG00000089693	protein_coding	0	0	0.710869	7.07445e-10	1	0	-0.0185957	0.950617	0	0	-0.278072	0.0555936	0
OTUB2	ENSG00000089723	protein_coding	0	0	1.60016	NA	0	0	-1.5642	NA	0	0	0.508056	NA	0
DDX24	ENSG00000089737	protein_coding	0	0	0.954196	0.386215	0	0	-0.0745536	0.965841	0	0	0.0929786	0.94397	0
ZBTB25	ENSG00000089775	protein_coding	0	0	-0.640892	0.0194305	0	1	-0.285874	0.640289	0	0	-0.146743	0.760033	0
NECAP1	ENSG00000089818	protein_coding	0	0	0.140026	0.817856	0	0	-0.0293195	0.954393	0	0	-0.15932	0.596064	0
ARHGAP4	ENSG00000089820	protein_coding	0	0	-0.188532	NA	0	0	-0.929985	0.706908	0	0	1.55225	NA	0
ANKRD24	ENSG00000089847	protein_coding	0	0	-0.212994	0.92604	0	0	-0.728907	0.764364	0	0	0.945693	0.774632	0
DHX32	ENSG00000089876	protein_coding	0	0	-0.466803	0.0817127	0	0	0.816102	0.0974314	0	0	1.09204	0.00516544	1
RCOR1	ENSG00000089902	protein_coding	0	0	0.314383	0.207424	0	0	0.382227	0.334532	0	0	0.603284	0.0393164	1
GPATCH2L	ENSG00000089916	protein_coding	0	0	0.0106804	0.974559	0	0	-0.40271	0.17128	0	0	-0.415103	0.0576706	0
LTBP4	ENSG00000090006	protein_coding	0	0	-0.582442	5.81714e-06	0	1	-0.475071	0.0551003	0	0	-0.619759	4.40657e-05	0
BLVRB	ENSG00000090013	protein_coding	0	0	-0.617316	0.000527003	0	1	-0.117534	0.808715	0	0	0.0454267	0.900882	0
SLC9A1	ENSG00000090020	protein_coding	0	1	-1.29709	1.76157e-05	0	1	-1.65536	2.02611e-05	0	1	-2.10596	2.38003e-14	0
SPTLC1	ENSG00000090054	protein_coding	1	0	0.425892	0.0263043	1	0	1.0007	0.000202401	1	0	1.02175	6.7462e-06	1
PAPOLA	ENSG00000090060	protein_coding	0	0	-0.00151596	0.995034	0	0	0.112274	0.714272	0	0	0.0267042	0.907297	0
CCNK	ENSG00000090061	protein_coding	0	0	-0.257686	0.715501	0	0	-0.945745	0.213578	0	0	-0.32665	0.677442	0
PCBP4	ENSG00000090097	protein_coding	0	0	-0.0754474	0.79468	0	0	-0.445435	0.130928	0	0	-0.933964	9.27823e-08	0
RGS1	ENSG00000090104	protein_coding	0	0	NA	NA	0	0	-4.4645	NA	0	0	-3.47269	NA	0
YPEL3	ENSG00000090238	protein_coding	0	0	-0.244844	0.78568	0	0	-0.110056	0.942749	0	0	-0.536025	0.544766	0
MRPS33	ENSG00000090263	protein_coding	0	0	-0.316569	0.549032	0	0	-0.0309582	0.9782	0	0	0.831449	0.240785	0
NDUFB2	ENSG00000090266	protein_coding	0	0	0.103521	0.877281	0	0	0.0605671	0.953824	0	0	-0.195162	0.762102	0
NUDC	ENSG00000090273	protein_coding	0	0	0.206748	0.194288	0	0	-0.101207	0.730854	0	0	0.179666	0.358852	0
MAEA	ENSG00000090316	protein_coding	0	0	0.209002	0.426747	0	0	0.381391	0.315501	0	0	0.410384	0.147622	0
ICAM1	ENSG00000090339	protein_coding	0	0	0.1563	NA	0	0	1.00284	NA	0	0	0.151948	NA	0
STRN4	ENSG00000090372	protein_coding	0	0	-0.191827	0.241015	0	0	0.0156935	0.967237	0	0	-0.214585	0.298246	0
IRAK3	ENSG00000090376	protein_coding	0	0	1.59447	NA	0	0	1.37283	NA	0	0	0.501674	NA	0
LYZ	ENSG00000090382	protein_coding	0	0	NA	NA	0	0	NA	NA	0	0	NA	NA	0
SI	ENSG00000090402	protein_coding	0	0	NA	NA	0	0	NA	NA	0	0	NA	NA	0
MUL1	ENSG00000090432	protein_coding	0	0	0.725656	0.00880289	1	0	0.517576	0.261222	0	0	0.572792	0.096263	0
TFAP4	ENSG00000090447	protein_coding	0	0	0.174808	0.749007	0	0	-0.0575465	0.94994	0	0	-1.08312	0.000997988	0
PDCD7	ENSG00000090470	protein_coding	1	0	0.432743	0.0463613	1	0	1.23119	0.000758888	1	0	1.1651	1.93486e-05	1
SPG21	ENSG00000090487	protein_coding	0	0	0.122945	0.516736	0	0	0.385571	0.11758	0	0	-0.23356	0.201954	0
FETUB	ENSG00000090512	protein_coding	0	0	NA	NA	0	0	NA	NA	0	0	NA	NA	0
DNAJB11	ENSG00000090520	protein_coding	0	0	0.939156	1.21915e-06	1	0	0.287522	0.420224	0	0	0.3498	0.174309	0
P3H2	ENSG00000090530	protein_coding	0	0	0.460908	0.0106907	1	0	0.600925	0.0315206	1	0	0.352769	0.136172	0
THPO	ENSG00000090534	protein_coding	0	0	-1.52273	NA	0	0	0.258334	NA	0	0	-1.95217	0.469081	0
CHRD	ENSG00000090539	protein_coding	0	0	0.740367	0.222137	0	0	0.170707	0.877611	0	0	0.061299	0.938383	0
FLT3LG	ENSG00000090554	protein_coding	0	0	-0.842514	NA	0	0	-1.68042	NA	0	0	-0.899003	NA	0
RAB11FIP3	ENSG00000090565	protein_coding	0	0	0.00738031	0.996243	0	0	0.258277	0.893338	0	0	0.0177812	0.990451	0
GNPTG	ENSG00000090581	protein_coding	0	0	-0.452862	0.331334	0	0	-0.698686	0.275426	0	0	-0.822587	0.0616452	0
ZNF268	ENSG00000090612	protein_coding	0	0	-0.145953	0.623579	0	0	0.802582	0.0472475	1	0	0.78897	0.012949	1
GOLGA3	ENSG00000090615	protein_coding	0	0	0.166762	0.593763	0	0	0.0167568	0.977549	0	0	0.119685	0.748548	0
PABPC4	ENSG00000090621	protein_coding	0	0	0.0453024	0.769093	0	0	0.17466	0.373337	0	0	0.299866	0.0268673	0
CD209	ENSG00000090659	protein_coding	0	0	NA	NA	0	0	-2.47761	NA	0	0	NA	NA	0
CERS4	ENSG00000090661	protein_coding	0	0	0.0492059	0.949824	0	0	-0.399085	0.636608	0	0	-1.55415	7.68143e-06	0
MCOLN1	ENSG00000090674	protein_coding	0	0	-0.412924	0.550397	0	0	-0.578768	0.554573	0	0	-1.01654	0.0809744	0
USP48	ENSG00000090686	protein_coding	0	0	0.577494	0.000153829	1	0	0.446232	0.0912518	0	0	0.438245	0.0279745	1
EFNB1	ENSG00000090776	protein_coding	0	0	0.913372	0.00040545	1	0	0.864994	0.0341884	1	0	0.774162	0.289617	0
PDPR	ENSG00000090857	protein_coding	0	0	-0.130093	0.51301	0	0	-0.140267	0.669885	0	0	-0.474655	0.00431081	0
AARS	ENSG00000090861	protein_coding	0	0	-0.884248	1.43225e-30	0	1	0.679727	3.26431e-06	1	0	0.667555	3.84444e-08	1
GLG1	ENSG00000090863	protein_coding	0	0	0.00454629	0.979171	0	0	0.674666	9.9249e-07	1	0	0.764925	9.17468e-11	1
KIF4A	ENSG00000090889	protein_coding	1	0	1.10139	1.69171e-28	1	0	1.31056	4.3149e-12	1	0	1.76413	3.86035e-36	1
TNRC6A	ENSG00000090905	protein_coding	0	0	0.288816	0.153775	0	0	-0.215434	0.489702	0	0	0.0334294	0.908681	0
PLEKHG2	ENSG00000090924	protein_coding	0	0	0.380276	0.0717455	0	0	-0.387916	0.18976	0	0	-0.352543	0.13589	0
DLL3	ENSG00000090932	protein_coding	0	0	-0.412049	0.728345	0	0	0.167172	0.940061	0	0	-0.194427	0.905981	0
NAT14	ENSG00000090971	protein_coding	0	0	-0.441025	0.347696	0	0	-0.381511	0.627445	0	0	-0.742155	0.119593	0
PITPNM2	ENSG00000090975	protein_coding	0	0	-0.0901752	0.898427	0	0	-0.360881	0.677068	0	0	0.0755323	0.926442	0
EXOC1	ENSG00000090989	protein_coding	0	0	-0.0535503	0.831852	0	0	0.925343	0.000424383	1	0	1.01782	4.36779e-06	1
RBM27	ENSG00000091009	protein_coding	0	0	0.32126	0.236241	0	0	1.17309	0.00273837	1	0	1.20161	0.000213291	1
POU4F3	ENSG00000091010	protein_coding	0	0	-1.43172	NA	0	0	-0.125246	NA	0	0	-0.899003	NA	0
OSBPL8	ENSG00000091039	protein_coding	0	0	-0.0703839	0.71481	0	0	1.2043	5.86919e-09	1	0	1.41226	8.31422e-14	1
DTX2	ENSG00000091073	protein_coding	0	0	-0.761979	0.0964963	0	0	-0.915343	0.181194	0	0	-0.814224	0.127561	0
NLRC4	ENSG00000091106	protein_coding	0	0	-0.432241	NA	0	0	-1.37384	0.569854	0	0	-2.43755	0.0862568	0
PUS7	ENSG00000091127	protein_coding	0	0	0.472838	0.024142	1	0	0.369399	0.312621	0	0	0.705282	0.00606881	1
LAMB4	ENSG00000091128	protein_coding	0	0	0.604634	NA	0	0	0.380163	NA	0	0	-3.48487	NA	0
NRCAM	ENSG00000091129	protein_coding	0	0	0.366123	0.603429	0	0	0.333124	0.770181	0	0	0.211567	0.801596	0
LAMB1	ENSG00000091136	protein_coding	1	0	0.410938	0.000346221	1	0	0.495015	0.00431068	1	0	0.809076	3.28327e-08	1
SLC26A4	ENSG00000091137	protein_coding	0	0	0.751381	NA	0	0	1.5416	NA	0	0	-1.35388	0.628756	0
SLC26A3	ENSG00000091138	protein_coding	0	0	NA	NA	0	0	-3.41412	NA	0	0	NA	NA	0
DLD	ENSG00000091140	protein_coding	0	0	0.183515	0.238563	0	0	0.881819	4.90817e-05	1	0	0.982924	7.59386e-09	1
WDR7	ENSG00000091157	protein_coding	0	0	-0.0962836	0.813656	0	0	0.0281757	0.96662	0	0	0.476158	0.25651	0
TXNL1	ENSG00000091164	protein_coding	0	0	0.23363	0.222143	0	0	0.495435	0.0666685	0	0	0.765301	0.000279805	1
IL5RA	ENSG00000091181	protein_coding	0	0	-0.849832	NA	0	0	0.380163	NA	0	0	-4.3614	0.174601	0
ABCC6	ENSG00000091262	protein_coding	0	0	NA	NA	0	0	NA	NA	0	0	NA	NA	0
CMTM6	ENSG00000091317	protein_coding	1	0	1.32315	4.44165e-21	1	0	1.46969	2.96073e-12	1	0	1.68372	4.13763e-18	1
ITGA6	ENSG00000091409	protein_coding	0	0	-0.0169441	0.954665	0	0	0.842426	0.00273429	1	0	0.762507	0.00087009	1
RAPGEF4	ENSG00000091428	protein_coding	0	0	0.968689	0.604352	0	0	-0.371222	0.871629	0	0	0.11763	0.957952	0
AC013461.1	ENSG00000091436	protein_coding	0	0	-0.0760086	0.578963	0	0	0.885296	1.85622e-09	1	0	1.03393	7.07088e-15	1
SMPX	ENSG00000091482	protein_coding	0	0	NA	NA	0	0	NA	NA	0	0	-3.47269	NA	0
FH	ENSG00000091483	protein_coding	1	0	0.776443	8.63315e-12	1	0	1.19378	2.06785e-12	1	0	1.35798	1.72048e-18	1
SEL1L3	ENSG00000091490	protein_coding	0	0	-0.388604	0.014013	0	1	0.26195	0.444443	0	0	0.442675	0.0565151	0
TF	ENSG00000091513	protein_coding	0	0	NA	NA	0	0	NA	NA	0	0	-3.47269	NA	0
CDV3	ENSG00000091527	protein_coding	0	0	0.182503	0.0538428	0	0	1.00435	6.26445e-18	1	0	1.22102	1.3489e-29	1
MYO15A	ENSG00000091536	protein_coding	0	0	-3.27007	NA	0	0	-5.55667	NA	0	0	-6.58335	0.00384735	0
ALKBH5	ENSG00000091542	protein_coding	0	0	0.316627	0.035349	1	0	0.474856	0.0348544	1	0	0.00981522	0.967707	0
APOH	ENSG00000091583	protein_coding	0	0	NA	NA	0	0	NA	NA	0	0	-5.07497	NA	0
NLRP1	ENSG00000091592	protein_coding	0	0	-0.368963	0.322065	0	0	-0.412385	0.486642	0	0	-0.177727	0.728197	0
PITPNM3	ENSG00000091622	protein_coding	0	0	-0.129496	0.826589	0	0	-0.435672	0.529935	0	0	-0.312939	0.571697	0
SPAG7	ENSG00000091640	protein_coding	0	0	0.37335	0.506887	0	0	-0.25788	0.766823	0	0	0.168147	0.809434	0
ORC6	ENSG00000091651	protein_coding	0	0	0.844727	8.41525e-05	1	0	0.575123	0.0935188	0	0	0.693548	0.16338	0
ZFHX4	ENSG00000091656	protein_coding	0	0	0.166984	0.797154	0	0	0.0663308	0.883095	0	0	0.178412	0.510407	0
SLC17A6	ENSG00000091664	protein_coding	0	0	NA	NA	0	0	NA	NA	0	0	NA	NA	0
CPA1	ENSG00000091704	protein_coding	0	0	-2.28029	NA	0	0	-3.51116	NA	0	0	-3.33993	NA	0
ZC3HC1	ENSG00000091732	protein_coding	0	0	0.456628	0.434644	0	0	0.0278713	0.980083	0	0	-0.2785	0.656176	0
ESR1	ENSG00000091831	protein_coding	0	0	-1.25898	NA	0	0	-1.48402	NA	0	0	-2.03825	NA	0
RGS17	ENSG00000091844	protein_coding	0	0	0.308476	0.701288	0	0	-0.151953	0.903801	0	0	-0.605081	0.362325	0
ANGPT2	ENSG00000091879	protein_coding	0	0	-0.102971	NA	0	0	-1.72525	0.33981	0	0	-2.15594	0.114026	0
TMEM101	ENSG00000091947	protein_coding	0	0	-0.299376	0.362475	0	0	0.406024	0.470279	0	0	0.015269	0.975409	0
CD200	ENSG00000091972	protein_coding	0	0	-0.143954	0.939699	0	0	0.00243681	0.999384	0	0	0.492046	0.828321	0
CCDC80	ENSG00000091986	protein_coding	0	0	0.554326	8.18942e-06	1	0	0.391308	0.0568848	0	0	0.914167	1.57071e-08	1
CMA1	ENSG00000092009	protein_coding	0	0	NA	NA	0	0	NA	NA	0	0	NA	NA	0
PSME1	ENSG00000092010	protein_coding	0	0	-0.0633317	0.801949	0	0	0.363469	0.244205	0	0	0.666628	0.00408552	1
PPP2R3C	ENSG00000092020	protein_coding	0	0	-0.118465	0.874109	0	0	-0.0510109	0.965525	0	0	0.13616	0.876407	0
HAUS4	ENSG00000092036	protein_coding	0	0	0.207088	0.765563	0	0	0.326599	0.758764	0	0	0.598774	0.426826	0
JPH4	ENSG00000092051	protein_coding	0	0	0.224582	0.332417	0	0	0.100921	0.830225	0	0	-1.0319	1.27782e-10	0
MYH7	ENSG00000092054	protein_coding	0	0	0.598342	NA	0	0	0.375627	NA	0	0	-3.04541	NA	0
CEBPE	ENSG00000092067	protein_coding	0	0	NA	NA	0	0	NA	NA	0	0	NA	NA	0
SLC7A8	ENSG00000092068	protein_coding	0	0	-0.381308	0.79423	0	0	-0.427658	0.842154	0	0	-0.799064	0.574007	0
OSGEP	ENSG00000092094	protein_coding	0	0	-0.0210177	0.960029	0	0	0.288796	0.568495	0	0	0.15229	0.702577	0
SLC22A17.1	ENSG00000092096	protein_coding	0	0	0.940762	0.48389	0	0	0.0218419	0.992071	0	0	0.0542503	0.975409	0
RNF31	ENSG00000092098	protein_coding	0	0	-0.210627	0.630021	0	0	-0.125677	0.870854	0	0	-0.536545	0.16646	0
SCFD1	ENSG00000092108	protein_coding	0	0	0.363157	0.0727636	0	0	0.577413	0.0838516	0	0	0.945548	9.79816e-05	1
G2E3	ENSG00000092140	protein_coding	0	0	0.362736	0.122728	0	0	0.0475718	0.922771	0	0	0.322551	0.253711	0
HECTD1	ENSG00000092148	protein_coding	1	0	0.316813	0.00185148	1	0	1.12613	6.64141e-11	1	0	1.25454	2.11954e-22	1
HNRNPC	ENSG00000092199	protein_coding	1	0	0.349418	7.32401e-06	1	0	0.753399	4.9671e-13	1	0	0.709525	3.56413e-15	1
RPGRIP1	ENSG00000092200	protein_coding	0	0	-0.827476	NA	0	0	-1.06609	NA	0	0	-1.48717	NA	0
SUPT16H	ENSG00000092201	protein_coding	1	0	0.60115	1.03482e-12	1	0	1.02958	4.99897e-16	1	0	1.3442	1.09541e-31	1
TOX4	ENSG00000092203	protein_coding	0	0	-0.0887658	0.747553	0	0	0.11071	0.806188	0	0	0.0672797	0.835273	0
GEMIN2	ENSG00000092208	protein_coding	0	0	-0.0162232	0.98046	0	0	0.463298	0.560361	0	0	0.137148	0.829141	0
TGM1	ENSG00000092295	protein_coding	0	0	-0.000191233	0.999695	0	0	0.146984	0.901855	0	0	-0.517049	0.42621	0
TINF2	ENSG00000092330	protein_coding	0	0	0.201858	0.552334	0	0	-0.013955	0.982457	0	0	-0.0535504	0.897903	0
DAZL	ENSG00000092345	protein_coding	0	0	NA	NA	0	0	NA	NA	0	0	NA	NA	0
TBL1Y	ENSG00000092377	protein_coding	0	0	NA	NA	0	0	NA	NA	0	0	NA	NA	0
SEMA6A	ENSG00000092421	protein_coding	0	0	0.311213	0.637937	0	0	-0.453608	0.58324	0	0	-0.528435	0.355491	0
TRPM7	ENSG00000092439	protein_coding	0	0	-0.386124	0.0658295	0	0	-0.128779	0.779068	0	0	0.191656	0.551621	0
TYRO3	ENSG00000092445	protein_coding	0	0	0.141311	0.715988	0	0	-0.422206	0.329651	0	0	-0.357471	0.287661	0
WDR76	ENSG00000092470	protein_coding	0	0	0.241431	0.344668	0	0	0.277905	0.500941	0	0	0.363169	0.217483	0
CAPN3	ENSG00000092529	protein_coding	0	0	-0.842514	NA	0	0	-1.5642	NA	0	0	0.508056	NA	0
SNAP23	ENSG00000092531	protein_coding	0	0	-0.230759	0.386215	0	0	0.493826	0.312182	0	0	0.694722	0.0305528	1
TBX15	ENSG00000092607	protein_coding	0	0	0.618419	0.0885721	0	0	0.660309	0.250791	0	0	0.638902	0.154856	0
PHGDH	ENSG00000092621	protein_coding	0	0	-0.765896	3.15738e-23	0	1	0.295883	0.0700753	0	0	0.178592	0.179892	0
COL9A3	ENSG00000092758	protein_coding	0	0	5.05914	NA	0	0	-0.697446	0.776818	0	0	-0.316096	0.864312	0
EZR	ENSG00000092820	protein_coding	1	0	1.51922	1.11546e-76	1	0	0.855705	3.76666e-15	1	0	1.32112	4.21368e-38	1
MYL6	ENSG00000092841	protein_coding	0	0	-0.0295973	0.883219	0	0	-0.565217	0.000424411	0	1	-0.518128	8.84688e-05	0
AGO1	ENSG00000092847	protein_coding	0	0	-0.0909366	0.535522	0	0	0.390868	0.0394301	1	0	0.198859	0.215083	0
TEKT2	ENSG00000092850	protein_coding	0	0	2.19096	NA	0	0	-1.03596	NA	0	0	-0.425496	NA	0
CLSPN	ENSG00000092853	protein_coding	1	0	0.898997	5.53971e-11	1	0	0.776042	0.000399042	1	0	1.18184	1.93811e-10	1
RFFL	ENSG00000092871	protein_coding	0	0	0.0726294	0.895515	0	0	0.137523	0.865818	0	0	-0.334199	0.465232	0
UNC13D	ENSG00000092929	protein_coding	0	0	0.407371	0.00503942	1	0	-0.453016	0.0214368	0	1	-0.212369	0.238496	0
MFSD11	ENSG00000092931	protein_coding	0	0	-0.533226	0.0975271	0	0	-0.364177	0.552744	0	0	-0.404027	0.327461	0
DPYSL2	ENSG00000092964	protein_coding	0	0	0.39643	0.000111065	1	0	0.13023	0.529935	0	0	-0.512653	1.98441e-05	0
TGFB2	ENSG00000092969	protein_coding	1	0	0.466585	3.61551e-06	1	0	0.641015	1.26419e-05	1	0	0.659426	2.99446e-07	1
GPATCH2	ENSG00000092978	protein_coding	0	0	0.176329	0.60207	0	0	0.577107	0.190344	0	0	0.819469	0.018323	1
NUP50	ENSG00000093000	protein_coding	1	0	0.887626	4.07699e-24	1	0	1.02031	1.04254e-14	1	0	1.32019	3.41809e-29	1
CDC45	ENSG00000093009	protein_coding	0	0	-0.0810566	0.720371	0	0	0.0651592	0.868475	0	0	0.210989	0.390198	0
COMT	ENSG00000093010	protein_coding	0	0	-0.313977	0.0813468	0	0	0.184345	0.619335	0	0	0.196847	0.460531	0
CECR1	ENSG00000093072	protein_coding	0	0	1.59447	NA	0	0	1.37283	NA	0	0	-0.904262	NA	0
XXbac-B461K10.4	ENSG00000093100	processed_transcript	0	0	-3.16825	NA	0	0	-2.62476	NA	0	0	-3.04541	NA	0
VNN3	ENSG00000093134	protein_coding	0	0	NA	NA	0	0	NA	NA	0	0	NA	NA	0
[truncated: 55,994 more rows]

## Sheet: B. mRNA features
Gene.info_V87						CAP-seq U-2 OS
geneName	geneID	geneType	log2TE	Transcript length (kb)	AU content (%)	SG-proximal?	SG-excluded?
TSPAN6	ENSG00000000003	protein_coding	-0.359309	3.796	59.6	0	0
TNMD	ENSG00000000005	protein_coding	#N/A	1.339	59.2	0	0
DPM1	ENSG00000000419	protein_coding	1.0893	1.161	60.15	0	0
SCYL3	ENSG00000000457	protein_coding	-1.3396	6.364	59.86	0	0
C1orf112	ENSG00000000460	protein_coding	-0.371247	4.355	60.78	0	0
FGR	ENSG00000000938	protein_coding	#N/A	2.729	47.03	0	0
CFH	ENSG00000000971	protein_coding	#N/A	6.985	64.8	0	0
FUCA2	ENSG00000001036	protein_coding	-0.194324	2.356	60.31	0	0
GCLC	ENSG00000001084	protein_coding	0.0470902	3.813	59.84	1	0
NFYA	ENSG00000001167	protein_coding	0.329965	3.811	60	1	0
STPG1	ENSG00000001460	protein_coding	0.609327	6.016	55.91	0	0
NIPAL3	ENSG00000001461	protein_coding	-0.477838	5.481	55	0	0
LAS1L	ENSG00000001497	protein_coding	0.176754	5.205	49.55	1	0
ENPP4	ENSG00000001561	protein_coding	0.860434	4.651	63.94	0	0
SEMA3F	ENSG00000001617	protein_coding	-1.60266	3.802	42.26	0	0
CFTR	ENSG00000001626	protein_coding	#N/A	6.132	63.41	0	0
ANKIB1	ENSG00000001629	protein_coding	-2.36492	6.081	63.23	0	0
CYP51A1	ENSG00000001630	protein_coding	-0.29237	3.21	60.09	0	0
KRIT1	ENSG00000001631	protein_coding	-1.72756	4.762	63.52	0	0
RAD52	ENSG00000002016	protein_coding	-0.927244	2.826	54.83	0	0
BAD	ENSG00000002330	protein_coding	0.678072	1.157	46.08	0	0
LAP3	ENSG00000002549	protein_coding	-0.973832	2.213	55.83	0	0
CD99	ENSG00000002586	protein_coding	-0.0225867	1.245	52.61	0	0
HS3ST1	ENSG00000002587	protein_coding	#N/A	8.031	56.08	0	0
AOC1	ENSG00000002726	protein_coding	#N/A	3.135	52.2	0	0
WNT16	ENSG00000002745	protein_coding	#N/A	3.147	61.39	0	0
HECW1	ENSG00000002746	protein_coding	#N/A	9.501	57.97	0	0
MAD1L1	ENSG00000002822	protein_coding	-1.20517	2.991	44.35	0	0
LASP1	ENSG00000002834	protein_coding	2.60153	4.109	46.31	0	0
SNX11	ENSG00000002919	protein_coding	-0.447083	2.733	52	0	0
TMEM176A	ENSG00000002933	protein_coding	#N/A	2.065	42.43	0	0
M6PR	ENSG00000003056	protein_coding	-0.0282026	2.756	57.29	1	0
KLHL13	ENSG00000003096	protein_coding	-0.46464	5.331	63.44	0	0
CYP26B1	ENSG00000003137	protein_coding	#N/A	4.732	40.04	0	0
ICA1	ENSG00000003147	protein_coding	-1.49228	2.458	59.7	0	0
DBNDD1	ENSG00000003249	protein_coding	0.82415	2.889	40.61	0	0
ALS2	ENSG00000003393	protein_coding	-1.58316	6.644	61.94	0	0
CASP10	ENSG00000003400	protein_coding	#N/A	5.928	57.69	0	0
CFLAR	ENSG00000003402	protein_coding	-1.13894	14.672	55.65	0	0
TFPI	ENSG00000003436	protein_coding	#N/A	7.69	63.4	0	0
NDUFAF7	ENSG00000003509	protein_coding	-0.593441	2.974	61.03	0	0
RBM5	ENSG00000003756	protein_coding	-1.46949	5.616	55.55	0	0
MTMR7	ENSG00000003987	protein_coding	1.14568	3.85	59.64	0	0
SLC7A2	ENSG00000003989	protein_coding	0.372841	7.638	59.87	0	0
ARF5	ENSG00000004059	protein_coding	1.0171	1.509	43.5	0	0
SARM1	ENSG00000004139	protein_coding	0.61891	10.309	48.45	0	0
POLDIP2	ENSG00000004142	protein_coding	0.225077	2.121	49.84	0	0
PLXND1	ENSG00000004399	protein_coding	-0.0796172	7.094	41.61	0	0
AK2	ENSG00000004455	protein_coding	-0.22708	3.586	53.68	0	0
CD38	ENSG00000004468	protein_coding	#N/A	5.668	58.91	0	0
FKBP4	ENSG00000004478	protein_coding	0.110455	3.732	48.44	0	0
KDM1A	ENSG00000004487	protein_coding	-0.11218	3.059	60.84	1	0
RBM6	ENSG00000004534	protein_coding	-2.67192	4.324	55.86	0	0
CAMKK1	ENSG00000004660	protein_coding	-0.531581	3.898	42.83	0	0
RECQL	ENSG00000004700	protein_coding	0.672188	3.702	62.43	1	0
VPS50	ENSG00000004766	protein_coding	#N/A	5.736	65.17	0	0
HSPB6	ENSG00000004776	protein_coding	#N/A	1.634	37.44	0	0
ARHGAP33	ENSG00000004777	protein_coding	0.434403	4.219	39.07	0	0
NDUFAB1	ENSG00000004779	protein_coding	1.08789	0.885	51.2	0	0
PDK4	ENSG00000004799	protein_coding	#N/A	3.576	63.93	0	0
SLC22A16	ENSG00000004809	protein_coding	#N/A	2.033	58.67	0	0
ZMYND10	ENSG00000004838	protein_coding	#N/A	2.896	42.19	0	0
ABCB5	ENSG00000004846	protein_coding	#N/A	5.811	62.27	0	0
ARX	ENSG00000004848	protein_coding	#N/A	2.876	45.38	0	0
SLC25A13	ENSG00000004864	protein_coding	-0.199615	3.192	60.24	0	0
ST7	ENSG00000004866	protein_coding	-0.281644	2.899	60.85	0	0
CDC27	ENSG00000004897	protein_coding	-0.0967954	5.801	61.34	0	0
SLC4A1	ENSG00000004939	protein_coding	#N/A	4.965	44.2	0	0
CALCR	ENSG00000004948	protein_coding	#N/A	3.696	64.8	0	0
HCCS	ENSG00000004961	protein_coding	-1.41097	2.277	57.01	0	0
DVL2	ENSG00000004975	protein_coding	0.298244	3.018	44.86	0	0
PRSS22	ENSG00000005001	protein_coding	#N/A	1.386	40.65	0	0
UPF1	ENSG00000005007	protein_coding	0.45355	5.348	44.84	0	0
SKAP2	ENSG00000005020	protein_coding	1.1412	3.998	63.06	0	0
SLC25A5	ENSG00000005022	protein_coding	0.487128	1.274	46.75	0	0
MCUB	ENSG00000005059	protein_coding	#N/A	2.278	58.99	0	0
HOXA11	ENSG00000005073	protein_coding	1.58496	2.295	44.78	0	0
POLR2J	ENSG00000005075	protein_coding	1.47319	0.932	44.96	0	0
DHX33	ENSG00000005100	protein_coding	0	5.618	54.19	0	0
MEOX1	ENSG00000005102	protein_coding	#N/A	2.707	48.39	0	0
THSD7A	ENSG00000005108	protein_coding	#N/A	10.663	64.49	0	0
LIG3	ENSG00000005156	protein_coding	-0.147637	8.4	52.77	0	0
RPAP3	ENSG00000005175	protein_coding	-0.0512947	4.37	63.43	0	0
ACSM3	ENSG00000005187	protein_coding	0.475733	3.311	58.92	0	0
AC004381.6	ENSG00000005189	protein_coding	#N/A	2.722	60.11	0	0
CIAPIN1	ENSG00000005194	protein_coding	0.0721899	2.182	55.59	0	0
SPPL2B	ENSG00000005206	protein_coding	-0.741024	3.456	38.94	0	0
FAM214B	ENSG00000005238	protein_coding	#N/A	5.771	45.32	0	0
COPZ2	ENSG00000005243	protein_coding	#N/A	0.895	47.29	0	0
PRKAR2B	ENSG00000005249	protein_coding	0.926548	3.745	61.37	1	0
MSL3	ENSG00000005302	protein_coding	-0.761276	3.446	57.15	0	0
CREBBP	ENSG00000005339	protein_coding	-0.733081	10.803	54.99	0	0
TSPOAP1	ENSG00000005379	protein_coding	#N/A	7.483	42.16	0	0
MPO	ENSG00000005381	protein_coding	#N/A	3.215	44.87	0	0
PON1	ENSG00000005421	protein_coding	#N/A	2.568	59.5	0	0
GCFC2	ENSG00000005436	protein_coding	-1.2728	4.44	63.61	0	0
WDR54	ENSG00000005448	protein_coding	-0.22393	2.356	45.32	0	0
CROT	ENSG00000005469	protein_coding	-0.0590355	3.175	62.57	0	0
ABCB4	ENSG00000005471	protein_coding	#N/A	4.02	61.4	0	0
KMT2E	ENSG00000005483	protein_coding	-2.19004	6.874	62.54	0	0
RHBDD2	ENSG00000005486	protein_coding	0.86287	1.878	52.21	0	1
SOX8	ENSG00000005513	protein_coding	#N/A	4.153	35.19	0	0
IBTK	ENSG00000005700	protein_coding	-0.500764	6.054	63.93	0	0
ZNF195	ENSG00000005801	protein_coding	-1.84299	3.342	58.57	0	0
MYCBP2	ENSG00000005810	protein_coding	-3.27565	14.736	64.28	0	0
FBXL3	ENSG00000005812	protein_coding	-1.35867	3.503	61.64	0	0
ITGAL	ENSG00000005844	protein_coding	#N/A	5.213	49.54	0	0
PDK2	ENSG00000005882	protein_coding	1.74366	3.44	43.33	0	0
ITGA3	ENSG00000005884	protein_coding	0.415037	5.479	47.36	0	0
ZFX	ENSG00000005889	protein_coding	-2.33943	7.558	59.23	0	0
LAMP2	ENSG00000005893	protein_coding	0.811097	4.03	61.21	0	0
ITGA2B	ENSG00000005961	protein_coding	#N/A	3.333	45.17	0	0
ASB4	ENSG00000005981	protein_coding	#N/A	3.825	61.73	0	0
GDE1	ENSG00000006007	protein_coding	-1.61675	2.958	59.83	0	0
C19orf60	ENSG00000006015	protein_coding	0.766741	2.465	39.76	0	0
CRLF1	ENSG00000006016	protein_coding	#N/A	1.792	44.68	0	0
OSBPL7	ENSG00000006025	protein_coding	#N/A	4.497	42.14	0	0
TMEM98	ENSG00000006042	protein_coding	-0.123631	4.434	51.53	0	0
YBX2	ENSG00000006047	protein_coding	#N/A	4.553	42.08	0	0
KRT33A	ENSG00000006059	protein_coding	#N/A	1.287	51.64	0	0
MAP3K14	ENSG00000006062	protein_coding	-0.410788	4.583	50.03	0	0
ABCC8	ENSG00000006071	protein_coding	-2.04182	4.923	50	0	0
CACNG3	ENSG00000006116	protein_coding	#N/A	3.088	55.46	0	0
TMEM132A	ENSG00000006118	protein_coding	-1.08523	3.981	41.29	0	0
AP2B1	ENSG00000006125	protein_coding	0.460897	5.702	60.07	0	0
TAC1	ENSG00000006128	protein_coding	#N/A	1.239	60.2	0	0
ZNF263	ENSG00000006194	protein_coding	-1.95641	3.83	52.91	0	0
CX3CL1	ENSG00000006210	protein_coding	#N/A	5.796	46.3	0	0
SPATA20	ENSG00000006282	protein_coding	-0.942572	3.539	42.95	0	0
CACNA1G	ENSG00000006283	protein_coding	#N/A	8.138	43.17	0	0
TNFRSF12A	ENSG00000006327	protein_coding	#N/A	1.678	39.88	0	0
DLX6	ENSG00000006377	protein_coding	#N/A	2.304	50.49	0	0
MAP3K9	ENSG00000006432	protein_coding	-2.97888	11.169	55.02	0	0
RALA	ENSG00000006451	protein_coding	0.786558	2.88	60.31	0	0
BAIAP2L1	ENSG00000006453	protein_coding	0.405192	3.622	53.23	0	0
KDM7A	ENSG00000006459	protein_coding	#N/A	9.272	60.82	0	0
ETV1	ENSG00000006468	protein_coding	#N/A	6.74	63.7	0	0
AGK	ENSG00000006530	protein_coding	-0.073451	3.849	60.41	0	0
ALDH3B1	ENSG00000006534	protein_coding	#N/A	5.884	41.6	0	0
TTC22	ENSG00000006555	protein_coding	#N/A	3.345	47.74	0	0
PHTF2	ENSG00000006576	protein_coding	-0.86952	5.198	62.35	0	0
CCL26	ENSG00000006606	protein_coding	#N/A	0.703	51.91	0	0
FARP2	ENSG00000006607	protein_coding	-0.0467024	6.065	54.4	0	0
USH1C	ENSG00000006611	protein_coding	#N/A	2.7	48.22	0	0
GGCT	ENSG00000006625	protein_coding	0.236924	1.173	59.45	0	0
DBF4	ENSG00000006634	protein_coding	-2.60033	3.907	63.28	1	0
TBXA2R	ENSG00000006638	protein_coding	#N/A	2.608	44.23	0	0
IFRD1	ENSG00000006652	protein_coding	-1.6632	3.397	60.55	0	1
LGALS14	ENSG00000006659	protein_coding	#N/A	0.774	54.7	0	0
COX10	ENSG00000006695	protein_coding	-1.07587	2.873	61.53	0	0
GTF2IRD1	ENSG00000006704	protein_coding	-0.706394	5.868	47.28	0	0
PAF1	ENSG00000006712	protein_coding	1.23407	2.066	47.27	0	0
VPS41	ENSG00000006715	protein_coding	-1.72389	5.903	61.65	0	0
ARHGAP44	ENSG00000006740	protein_coding	-1.14202	4.428	57.32	0	0
ELAC2	ENSG00000006744	protein_coding	-0.828857	3.738	51.92	0	0
SCIN	ENSG00000006747	protein_coding	#N/A	9.713	61.54	0	0
ARSD	ENSG00000006756	protein_coding	#N/A	5.159	51.12	0	0
PNPLA4	ENSG00000006757	protein_coding	#NUM!	3.372	59.55	0	0
MYH13	ENSG00000006788	protein_coding	#N/A	6.296	54.31	0	0
ADIPOR2	ENSG00000006831	protein_coding	0.396951	4.018	60.6	1	0
CDKL3	ENSG00000006837	protein_coding	#N/A	2.16	59.84	0	0
UPP2	ENSG00000007001	protein_coding	#N/A	2.435	59.76	0	0
PRSS21	ENSG00000007038	protein_coding	#N/A	1.106	44.35	0	0
MARK4	ENSG00000007047	protein_coding	0.232752	5.209	46.43	0	0
PROM1	ENSG00000007062	protein_coding	#N/A	4.349	56.83	0	0
CCDC124	ENSG00000007080	protein_coding	0.930759	1.055	44.16	0	0
CEACAM21	ENSG00000007129	protein_coding	#N/A	1.691	55.34	0	0
PAFAH1B1	ENSG00000007168	protein_coding	0.134938	5.497	57.6	1	0
NOS2	ENSG00000007171	protein_coding	1.03449	4.176	48.64	0	0
DNAH9	ENSG00000007174	protein_coding	#N/A	13.75	57.37	0	0
KIAA0100	ENSG00000007202	protein_coding	-2.99302	7.407	53.25	0	0
SLC13A2	ENSG00000007216	protein_coding	#N/A	2.855	47.45	0	0
GAS7	ENSG00000007237	protein_coding	#N/A	8.033	52.03	0	0
TRAPPC6A	ENSG00000007255	protein_coding	0.227069	0.805	43.14	0	0
MATK	ENSG00000007264	protein_coding	-2.61644	2.133	45.6	0	0
CEACAM7	ENSG00000007306	protein_coding	#N/A	2.489	52.14	0	0
CD79B	ENSG00000007312	protein_coding	#N/A	1.269	39.31	0	0
SCN4A	ENSG00000007314	protein_coding	#N/A	7.805	43.9	0	0
ST7L	ENSG00000007341	protein_coding	-0.0819773	4.528	60.95	0	0
TKTL1	ENSG00000007350	protein_coding	#N/A	2.642	51.66	0	0
PAX6	ENSG00000007372	protein_coding	-0.298015	6.922	50.32	0	0
RPUSD1	ENSG00000007376	protein_coding	-0.598078	2.159	32.83	0	0
RHBDF1	ENSG00000007384	protein_coding	1.09163	2.992	38.85	0	0
LUC7L	ENSG00000007392	protein_coding	-3	2.737	52.67	0	0
CACNA2D2	ENSG00000007402	protein_coding	-0.516398	5.476	43.48	0	0
BAIAP3	ENSG00000007516	protein_coding	#N/A	4.732	34.28	0	0
TSR3	ENSG00000007520	protein_coding	-0.527866	1.243	37.43	0	0
PIGQ	ENSG00000007541	protein_coding	-0.175294	3.006	35.64	0	0
CRAMP1	ENSG00000007545	protein_coding	#N/A	7.772	46.89	0	0
TEAD3	ENSG00000007866	protein_coding	#N/A	2.983	43.25	0	0
SELE	ENSG00000007908	protein_coding	#N/A	3.857	60.63	0	0
DNAJC11	ENSG00000007923	protein_coding	-0.632484	3.311	53.4	0	0
FMO3	ENSG00000007933	protein_coding	#N/A	2.087	63.5	0	0
MYLIP	ENSG00000007944	protein_coding	-0.730539	2.796	59.81	0	0
NOX1	ENSG00000007952	protein_coding	#N/A	2.529	58.86	0	0
E2F2	ENSG00000007968	protein_coding	0.983559	5.191	48.34	0	0
PSMB1	ENSG00000008018	protein_coding	1.24506	1.939	60.19	0	0
SYN1	ENSG00000008056	protein_coding	#N/A	3.209	52.24	0	0
JARID2	ENSG00000008083	protein_coding	-0.872228	5.755	56.08	0	0
CDKL5	ENSG00000008086	protein_coding	-1.49668	12.533	59.79	0	0
CAMK1G	ENSG00000008118	protein_coding	#N/A	2.612	52.99	0	0
CDK11A	ENSG00000008128	protein_coding	#N/A	2.653	48.01	0	0
NADK	ENSG00000008130	protein_coding	-1.04196	3.653	46.3	0	0
TFAP2B	ENSG00000008196	protein_coding	#N/A	5.773	55.86	0	0
TFAP2D	ENSG00000008197	protein_coding	#N/A	1.711	62.76	0	0
DLEC1	ENSG00000008226	protein_coding	#N/A	6.426	51.5	0	0
CYTH3	ENSG00000008256	protein_coding	-0.788024	4.508	55.22	1	0
ADAM22	ENSG00000008277	protein_coding	-1.94322	9.334	62.71	0	0
SYPL1	ENSG00000008282	protein_coding	2.05327	2.151	61.82	1	0
CYB561	ENSG00000008283	protein_coding	0.741932	3.2	42.59	0	0
SPAG9	ENSG00000008294	protein_coding	-0.852488	8.273	60	0	0
CELSR3	ENSG00000008300	protein_coding	-2.83219	11.956	40.11	0	0
AASS	ENSG00000008311	protein_coding	-1.54165	3.233	63.52	0	0
PLEKHG6	ENSG00000008323	protein_coding	#N/A	3.111	44.29	0	0
SS18L2	ENSG00000008324	protein_coding	-0.157791	1.047	52.23	0	0
MPND	ENSG00000008382	protein_coding	-0.749677	1.611	44.05	0	0
MGST1	ENSG00000008394	protein_coding	2.65914	2.152	63.06	0	0
CRY1	ENSG00000008405	protein_coding	-1.24832	3.834	62.38	0	0
PGLYRP1	ENSG00000008438	protein_coding	#N/A	0.72	42.27	0	0
NFIX	ENSG00000008441	protein_coding	1.36591	5.459	44.72	0	0
ST3GAL1	ENSG00000008513	protein_coding	-0.70044	6.951	50.6	0	0
MMP25	ENSG00000008516	protein_coding	#N/A	3.554	41.8	0	0
IL32	ENSG00000008517	protein_coding	#N/A	1.381	46.64	0	0
PKD1	ENSG00000008710	protein_coding	-3.24527	14.138	36.9	0	1
MAPK8IP2	ENSG00000008735	protein_coding	0.973365	5.596	36.93	0	0
MED24	ENSG00000008838	protein_coding	-0.215003	3.896	49.37	0	0
RHOBTB2	ENSG00000008853	protein_coding	-0.268489	5.451	46.49	0	0
HEATR5B	ENSG00000008869	protein_coding	-1.39323	6.905	61.41	0	0
SEC62	ENSG00000008952	protein_coding	-0.462156	6.568	63.4	0	0
RPS20	ENSG00000008988	protein_coding	-1.78862	1.826	58.03	0	0
CSDE1	ENSG00000009307	protein_coding	-1.68212	4.312	61.72	0	0
UBE3C	ENSG00000009335	protein_coding	-1.38721	5.229	57.88	1	0
REV3L	ENSG00000009413	protein_coding	-3.48328	10.964	63.1	0	0
TENM1	ENSG00000009694	protein_coding	-7.61839	12.891	62.83	0	0
PAX7	ENSG00000009709	protein_coding	#N/A	5.538	47.65	0	0
MASP2	ENSG00000009724	protein_coding	#N/A	2.439	49.79	0	0
IYD	ENSG00000009765	protein_coding	#N/A	8.742	58.4	0	0
FAM76A	ENSG00000009780	protein_coding	-1.42139	3.567	56.65	0	0
TRAF3IP3	ENSG00000009790	protein_coding	#N/A	3.302	54.39	0	0
POMT2	ENSG00000009830	protein_coding	-1.93832	5.647	52.92	0	0
VTA1	ENSG00000009844	protein_coding	0.432546	7.028	64.47	1	0
MLXIPL	ENSG00000009950	protein_coding	0.46158	3.278	43.75	0	0
BAZ1B	ENSG00000009954	protein_coding	-1.3333	6.102	56.81	0	0
RANBP9	ENSG00000010017	protein_coding	0.22395	3.113	63.06	0	0
ETV7	ENSG00000010030	protein_coding	#N/A	1.776	50.66	0	0
SPRTN	ENSG00000010072	protein_coding	-1.35752	3.559	58.43	0	0
METTL13	ENSG00000010165	protein_coding	-0.769529	3.327	56.39	0	0
DYRK4	ENSG00000010219	protein_coding	0.201977	3.272	57.23	0	0
ZNF207	ENSG00000010244	protein_coding	0.462742	13.781	61.52	0	0
UQCRC1	ENSG00000010256	protein_coding	-0.560935	1.985	46.96	0	0
STARD3NL	ENSG00000010270	protein_coding	-1.25477	3.653	61.6	0	0
CD9	ENSG00000010278	protein_coding	3.20553	1.556	48.96	1	0
HHATL	ENSG00000010282	protein_coding	#N/A	1.865	43.52	0	0
NCAPD2	ENSG00000010292	protein_coding	0.02539	5.548	53.66	1	0
IFFO1	ENSG00000010295	protein_coding	-0.168754	3.101	45.68	0	0
GIPR	ENSG00000010310	protein_coding	#N/A	3.289	45.06	0	0
PHF7	ENSG00000010318	protein_coding	-4.05311	2.13	54.82	0	0
SEMA3G	ENSG00000010319	protein_coding	-2.39232	4.899	40.37	0	0
NISCH	ENSG00000010322	protein_coding	-1.22988	5.35	46.72	0	1
STAB1	ENSG00000010327	protein_coding	#N/A	7.928	39.35	0	0
FUZ	ENSG00000010361	protein_coding	-0.501634	1.675	47.71	0	0
SLC6A13	ENSG00000010379	protein_coding	#N/A	2.185	52.81	0	0
IDS	ENSG00000010404	protein_coding	-3.86335	7.619	54.66	0	0
PRSS3	ENSG00000010438	protein_coding	#N/A	1.144	57.16	0	0
ZNF200	ENSG00000010539	protein_coding	0.180082	4.308	56.33	0	0
CD4	ENSG00000010610	protein_coding	#N/A	3.114	51.45	0	0
LRRC23	ENSG00000010626	protein_coding	-2.13245	1.628	52.65	0	0
BTK	ENSG00000010671	protein_coding	#N/A	2.767	56.82	0	0
HFE	ENSG00000010704	protein_coding	#N/A	5.286	55.15	0	0
SCMH1	ENSG00000010803	protein_coding	-1.75598	3.323	60.5	0	0
FYN	ENSG00000010810	protein_coding	-0.929881	3.628	57.58	0	0
HIVEP2	ENSG00000010818	protein_coding	-0.89775	9.723	61.68	0	0
FMO1	ENSG00000010932	protein_coding	#N/A	3.13	59.09	0	0
TCEB3	ENSG00000011007	protein_coding	-0.885238	5.154	54.3	1	0
LYPLA2	ENSG00000011009	protein_coding	0.950363	1.81	37.61	0	0
CLCN6	ENSG00000011021	protein_coding	-1.98592	5.631	52.21	0	0
MRC2	ENSG00000011028	protein_coding	0.522227	5.988	47.76	0	1
NME1-NME2	ENSG00000011052	protein_coding	1.03545	1.193	51.14	0	0
SLC6A7	ENSG00000011083	protein_coding	#N/A	3.739	45.31	0	0
TSPAN9	ENSG00000011105	protein_coding	2.31853	4.323	47.87	0	0
BTBD7	ENSG00000011114	protein_coding	-2.02337	8.43	59.92	0	0
APBA3	ENSG00000011132	protein_coding	-0.927592	4.25	43.36	0	0
MKS1	ENSG00000011143	protein_coding	-0.119961	2.397	52.54	0	0
ABHD5	ENSG00000011198	protein_coding	-1.36347	1.69	59.74	0	0
ANOS1	ENSG00000011201	protein_coding	#N/A	6.314	60.41	0	0
AKAP8L	ENSG00000011243	protein_coding	-0.408646	2.749	51.14	0	0
MBTD1	ENSG00000011258	protein_coding	-1.32393	5.382	60.5	0	0
UTP18	ENSG00000011260	protein_coding	-0.304855	1.894	59.62	1	0
RNF216	ENSG00000011275	protein_coding	-1.53611	5.639	54.48	0	0
TTC19	ENSG00000011295	protein_coding	-0.819121	3.075	58.93	0	0
PTBP1	ENSG00000011304	protein_coding	1.05663	4.661	38.83	0	0
DPF1	ENSG00000011332	protein_coding	1.1006	2.356	42.85	0	0
SYT7	ENSG00000011347	protein_coding	#N/A	4.854	42.85	0	0
LARS2	ENSG00000011376	protein_coding	-2.34841	4.744	57.85	0	0
PIK3C2A	ENSG00000011405	protein_coding	-1.62875	8.227	60.16	0	0
PLAUR	ENSG00000011422	protein_coding	1.11136	1.61	50.06	0	0
ANLN	ENSG00000011426	protein_coding	-0.669436	4.787	62.12	1	0
WIZ	ENSG00000011451	protein_coding	0.557848	5.695	41.84	0	0
RABGAP1	ENSG00000011454	protein_coding	-0.770947	4.997	61.51	0	0
DCN	ENSG00000011465	protein_coding	#N/A	7.156	65.08	0	0
QPCTL	ENSG00000011478	protein_coding	0.048726	2.31	47.44	0	0
PPP5C	ENSG00000011485	protein_coding	-0.0416191	4.675	49.25	0	0
CEP68	ENSG00000011523	protein_coding	-0.709039	5.847	52.19	0	0
MAP4K3	ENSG00000011566	protein_coding	-1.23017	4.362	63.1	1	0
ZBTB32	ENSG00000011590	protein_coding	#N/A	2.068	47.51	0	0
TYROBP	ENSG00000011600	protein_coding	#N/A	0.62	48.55	0	0
TMEM159	ENSG00000011638	protein_coding	#N/A	2.014	56.3	0	0
GABRA3	ENSG00000011677	protein_coding	#N/A	3.712	62.64	0	0
BRCA1	ENSG00000012048	protein_coding	-1.83099	7.094	55.91	0	0
ERCC1	ENSG00000012061	protein_coding	-0.341161	3.828	47.9	0	0
CD22	ENSG00000012124	protein_coding	#N/A	3.268	49.75	0	0
SEMA3B	ENSG00000012171	protein_coding	#N/A	3.283	39.29	0	0
MBTPS2	ENSG00000012174	protein_coding	1.22981	4.457	61.51	0	0
PRICKLE3	ENSG00000012211	protein_coding	0.38048	2.246	43.95	0	0
LTF	ENSG00000012223	protein_coding	#N/A	2.979	53.05	0	0
EXTL3	ENSG00000012232	protein_coding	-0.700199	8.257	55.64	0	0
NR1H4	ENSG00000012504	protein_coding	#N/A	2.884	60.26	0	0
ELOVL5	ENSG00000012660	protein_coding	1.5082	3.081	58.12	0	0
ALOX5	ENSG00000012779	protein_coding	#N/A	2.506	52.27	0	0
KDM5D	ENSG00000012817	protein_coding	#N/A	5.579	61.34	0	0
CALCOCO1	ENSG00000012822	protein_coding	0.162271	5.866	50.8	0	0
UBR7	ENSG00000012963	protein_coding	0.52374	3.694	56.71	0	0
MAP4K5	ENSG00000012983	protein_coding	-1.24428	4.812	62.73	0	0
EHD3	ENSG00000013016	protein_coding	-0.798366	4.636	49.87	0	0
PSMC4	ENSG00000013275	protein_coding	1.46639	1.623	49.75	0	0
MAN2B2	ENSG00000013288	protein_coding	-0.458909	7.719	45.42	0	0
SLC7A14	ENSG00000013293	protein_coding	#N/A	10.103	57.85	0	0
CLDN11	ENSG00000013297	protein_coding	#N/A	2.169	58.46	0	0
SLC25A39	ENSG00000013306	protein_coding	-1.03375	2.217	38.89	0	0
MVP	ENSG00000013364	protein_coding	#N/A	2.925	47.46	1	0
NUB1	ENSG00000013374	protein_coding	0.869724	3.21	55.04	0	0
PGM3	ENSG00000013375	protein_coding	0.817349	6.107	61.34	0	0
RWDD2A	ENSG00000013392	protein_coding	0.652805	3.744	55.24	0	0
CLK1	ENSG00000013441	protein_coding	-2.02389	3.208	58.15	0	0
POLR3B	ENSG00000013503	protein_coding	-0.691028	4.273	60.25	1	0
ANGEL1	ENSG00000013523	protein_coding	-1.10178	5.176	55.48	0	0
RNF14	ENSG00000013561	protein_coding	-0.676767	4.235	57.96	0	0
DNASE1L1	ENSG00000013563	protein_coding	-1.56857	3.008	45.53	0	0
DDX11	ENSG00000013573	protein_coding	-1.31952	4.182	47.72	0	0
HEBP1	ENSG00000013583	protein_coding	1.87122	2.056	56.48	0	0
GPRC5A	ENSG00000013588	protein_coding	#N/A	7.362	53.23	0	0
MAMLD1	ENSG00000013619	protein_coding	#N/A	4.854	55.92	0	0
CD6	ENSG00000013725	protein_coding	#N/A	3.252	50.07	0	0
TACC3	ENSG00000013810	protein_coding	0.230889	2.781	43.93	0	0
UFL1	ENSG00000014123	protein_coding	-0.735082	4.224	66.62	0	0
POLA2	ENSG00000014138	protein_coding	-0.579897	3.744	52.1	0	0
ZC3H3	ENSG00000014164	protein_coding	0.531664	3.28	41.62	0	0
CAPN1	ENSG00000014216	protein_coding	1.58496	3.086	48.82	0	0
ACPP	ENSG00000014257	protein_coding	#N/A	3.125	59.6	0	0
MDH1	ENSG00000014641	protein_coding	0.0103947	1.65	61.95	0	0
SLC30A9	ENSG00000014824	protein_coding	-1.90881	6.218	63.02	0	0
MTMR11	ENSG00000014914	protein_coding	#N/A	3.332	49.99	0	0
COX15	ENSG00000014919	protein_coding	0.828	2.788	57.58	0	0
CCDC88C	ENSG00000015133	protein_coding	-0.296665	7.474	48.75	0	0
YAF2	ENSG00000015153	protein_coding	0.97565	5.095	60.98	0	0
ZMYND11	ENSG00000015171	protein_coding	-0.595532	4.306	62.2	0	0
WAS	ENSG00000015285	protein_coding	#N/A	1.849	49.18	0	0
DPEP1	ENSG00000015413	protein_coding	#N/A	1.772	40.92	0	0
BID	ENSG00000015475	protein_coding	1.22882	2.495	47.49	0	0
MATR3.2	ENSG00000015479	protein_coding	-0.603611	7.306	61.16	0	0
NPC1L1	ENSG00000015520	protein_coding	#N/A	5.048	48.5	0	0
XYLT2	ENSG00000015532	protein_coding	-0.562936	3.507	43.46	0	0
RGPD5	ENSG00000015568	protein_coding	#N/A	7.253	60.66	0	0
STMN4	ENSG00000015592	protein_coding	#N/A	2.288	51.97	0	0
NUDCD3	ENSG00000015676	protein_coding	0.394244	8.256	55.48	0	0
ISL1	ENSG00000016082	protein_coding	-0.885357	2.459	55.68	0	0
CHDH	ENSG00000016391	protein_coding	-0.46445	7.665	50.68	0	0
IL20RA	ENSG00000016402	protein_coding	#N/A	3.522	58.8	0	0
CLCA1	ENSG00000016490	protein_coding	#N/A	3.31	59.91	0	0
CLCA4	ENSG00000016602	protein_coding	#N/A	3.211	62.01	0	0
GLT8D1	ENSG00000016864	protein_coding	-1.50589	2.149	55.37	0	0
ATP2C1	ENSG00000017260	protein_coding	-0.883267	5.067	62.44	1	0
IGF1	ENSG00000017427	protein_coding	#N/A	7.37	60.34	0	0
SLC38A5	ENSG00000017483	protein_coding	#N/A	2.659	45.11	0	0
RALBP1	ENSG00000017797	protein_coding	-1.52729	4.368	58.62	1	0
RUFY3	ENSG00000018189	protein_coding	-0.981384	4.233	60.09	0	0
CNTN1	ENSG00000018236	protein_coding	0.26748	5.557	64.79	0	0
SLC11A1	ENSG00000018280	protein_coding	#N/A	5.772	44.66	0	0
WWTR1	ENSG00000018408	protein_coding	3.16551	5.03	58.93	0	0
AGPS	ENSG00000018510	protein_coding	-0.355028	7.764	63.49	0	0
CXorf56	ENSG00000018610	protein_coding	-0.314717	2.372	55.71	0	0
ATP1A2	ENSG00000018625	protein_coding	#N/A	5.421	49.62	0	0
TTC27	ENSG00000018699	protein_coding	-1.08137	2.876	60.54	0	0
ZNF582	ENSG00000018869	protein_coding	-0.568843	2.824	59.16	0	0
VSIG2	ENSG00000019102	protein_coding	#N/A	1.191	46.3	0	0
PHLDB1	ENSG00000019144	protein_coding	0.411497	5.945	45.7	0	0
MARCO	ENSG00000019169	protein_coding	#N/A	1.838	55.67	0	0
CYP24A1	ENSG00000019186	protein_coding	#N/A	3.262	56.64	0	0
PRDM11	ENSG00000019485	protein_coding	-1.953	10.744	52.16	0	0
SYT13	ENSG00000019505	protein_coding	#N/A	5.144	53.73	0	0
SNAI2	ENSG00000019549	protein_coding	-4.24207	2.204	59.05	0	0
CD74	ENSG00000019582	protein_coding	#N/A	1.727	46.7	0	0
HGF	ENSG00000019991	protein_coding	#N/A	5.989	65.58	0	0
ZRANB1	ENSG00000019995	protein_coding	-1.65198	5.695	60.32	0	0
NCDN	ENSG00000020129	protein_coding	0.803618	3.683	42.29	0	0
ADGRA2	ENSG00000020181	protein_coding	#N/A	6.27	44.75	0	0
ZFP64	ENSG00000020256	protein_coding	-0.0731477	3.264	55.95	0	0
MNAT1	ENSG00000020426	protein_coding	-0.819428	2.635	63.38	0	0
SAMD4A	ENSG00000020577	protein_coding	-0.216133	6.833	56.9	0	0
RUNX3	ENSG00000020633	protein_coding	#N/A	4.34	45.2	0	0
MRE11	ENSG00000020922	protein_coding	#N/A	6.897	62.69	1	0
PLEKHB1	ENSG00000021300	protein_coding	#N/A	2.38	47.06	0	0
SERPINB1	ENSG00000021355	protein_coding	1.53542	2.619	56.84	0	0
CYP3A43	ENSG00000021461	protein_coding	#N/A	1.848	59.32	0	0
SLC7A9	ENSG00000021488	protein_coding	#N/A	1.998	53.38	0	0
SPAST	ENSG00000021574	protein_coding	-1.20494	5.212	60.02	1	0
NRXN3	ENSG00000021645	protein_coding	-1.01421	8.504	60.54	0	0
OSBPL5	ENSG00000021762	protein_coding	-0.42711	3.889	43	0	0
AQR	ENSG00000021776	protein_coding	-0.50265	9.694	62.46	0	0
CPS1	ENSG00000021826	protein_coding	-3.5424	5.821	63.69	0	0
C8B	ENSG00000021852	protein_coding	#N/A	2.382	57.18	0	0
FHL1	ENSG00000022267	protein_coding	1.87705	2.878	57.93	1	0
RTFDC1	ENSG00000022277	protein_coding	0.333601	2.212	56.29	0	0
GABRA1	ENSG00000022355	protein_coding	#N/A	4.686	65.01	0	0
NLRP2	ENSG00000022556	protein_coding	#N/A	3.744	50.91	0	0
SLC45A4	ENSG00000022567	protein_coding	-1	7.483	47.36	0	0
RNF10	ENSG00000022840	protein_coding	-1.82706	3.825	54.75	0	0
ZNF839	ENSG00000022976	protein_coding	-1.2708	2.987	50.96	0	0
ZDHHC6	ENSG00000023041	protein_coding	-2.1352	2.906	61.39	0	0
GRAMD1B	ENSG00000023171	protein_coding	-0.0112273	7.723	54.2	0	0
RNH1	ENSG00000023191	protein_coding	0.775313	3.281	39.64	0	0
NDUFS1	ENSG00000023228	protein_coding	0.342934	11.819	59.19	0	0
RB1CC1	ENSG00000023287	protein_coding	-2.79642	6.635	62.27	0	0
ERP44	ENSG00000023318	protein_coding	0.575748	4.854	62.14	0	0
ALAS1	ENSG00000023330	protein_coding	-0.751538	2.43	54.53	0	0
BIRC3	ENSG00000023445	protein_coding	#N/A	5.197	62.4	0	0
AKAP11	ENSG00000023516	protein_coding	-1.27744	9.92	63.55	0	0
GLRX2	ENSG00000023572	protein_coding	-0.53842	1.131	58.08	0	0
SNAPC1	ENSG00000023608	protein_coding	0.169925	2.656	60.39	0	0
DERA	ENSG00000023697	protein_coding	0.307044	1.705	60.84	0	0
STRAP	ENSG00000023734	protein_coding	0.701809	1.866	63.52	1	0
ABCC2	ENSG00000023839	protein_coding	-4.21723	5.312	54.88	0	0
DEF6	ENSG00000023892	protein_coding	#N/A	2.262	51.55	0	0
PLEKHO1	ENSG00000023902	protein_coding	-1.45873	3.741	48.37	0	0
GCLM	ENSG00000023909	protein_coding	0.466332	4.857	63.63	0	0
UBR2	ENSG00000024048	protein_coding	-0.661368	7.857	60.9	0	0
EHD2	ENSG00000024422	protein_coding	#N/A	3.585	47.04	0	0
DEPDC1	ENSG00000024526	protein_coding	-1.43143	5.331	65.06	1	0
CCDC28A	ENSG00000024862	protein_coding	0.330149	1.505	60.82	0	0
RRAGD	ENSG00000025039	protein_coding	-1.0778	4.9	57.75	0	0
HSF2	ENSG00000025156	protein_coding	-0.145736	2.643	64.45	0	0
PHF20	ENSG00000025293	protein_coding	-1.97454	5.922	55.92	1	0
HSD17B6	ENSG00000025423	protein_coding	-0.522678	1.751	55.08	0	0
NR1H3	ENSG00000025434	protein_coding	-1.09592	2.731	49.13	0	0
TYMP	ENSG00000025708	protein_coding	#N/A	2.049	35.47	0	0
NCAPH2	ENSG00000025770	protein_coding	-0.761203	2.077	44.92	0	0
TOMM34	ENSG00000025772	protein_coding	0.409294	2.062	54.89	0	0
SEC63	ENSG00000025796	protein_coding	0.522027	6.411	60.18	0	0
KPNA6	ENSG00000025800	protein_coding	-0.000753366	7.378	55.79	1	0
VIM	ENSG00000026025	protein_coding	1.08198	2.666	53.75	0	0
RTEL1-TNFRSF6B	ENSG00000026036	protein_coding	#N/A	5.751	40.17	0	0
FAS	ENSG00000026103	protein_coding	1.5776	2.563	62.16	0	0
RNASET2	ENSG00000026297	protein_coding	-0.171697	2.445	51.3	0	0
CD44	ENSG00000026508	protein_coding	#N/A	4.589	58.44	0	0
KCNG1	ENSG00000026559	protein_coding	-0.909585	3.722	47.79	0	0
AGPAT4	ENSG00000026652	protein_coding	-0.453572	7.865	54.64	0	0
SLAMF7	ENSG00000026751	protein_coding	#N/A	3.542	56.01	0	0
BTN3A1	ENSG00000026950	protein_coding	-0.691314	3.442	55.55	0	0
MIPEP	ENSG00000027001	protein_coding	-0.210968	2.4	60.24	0	0
PRKCH	ENSG00000027075	protein_coding	1.19482	3.582	57.52	0	0
INSRR	ENSG00000027644	protein_coding	#N/A	5.101	44.49	0	0
IFNGR1	ENSG00000027697	protein_coding	-0.943473	2.139	61.19	1	0
B4GALT7	ENSG00000027847	protein_coding	-0.764711	2.653	42.08	0	0
SH2D2A	ENSG00000027869	protein_coding	#N/A	1.673	44.44	0	0
VRK2	ENSG00000028116	protein_coding	-1.22401	2.446	64.76	0	0
TNFRSF1B	ENSG00000028137	protein_coding	#N/A	3.683	44.58	0	0
VEZT	ENSG00000028203	protein_coding	-1.02716	4.562	61.4	0	0
POU2F2	ENSG00000028277	protein_coding	#N/A	6.901	48.69	0	0
BRD9	ENSG00000028310	protein_coding	-1.45241	4.865	44.86	0	0
SNX1	ENSG00000028528	protein_coding	0.193344	8.119	56.32	0	0
TBPL1	ENSG00000028839	protein_coding	-0.0912805	4.228	62.4	0	0
ARNTL2	ENSG00000029153	protein_coding	-3.23861	6.785	60.74	0	0
BCLAF1	ENSG00000029363	protein_coding	-1.13906	7.263	64.39	0	0
SLC39A9	ENSG00000029364	protein_coding	-0.515192	5.192	59.8	0	0
ANK1	ENSG00000029534	protein_coding	-1.46755	8.297	50.68	0	0
IBSP	ENSG00000029559	protein_coding	#N/A	1.546	63.89	0	0
TFB1M	ENSG00000029639	protein_coding	-1.7702	1.424	61.65	0	0
RABEP1	ENSG00000029725	protein_coding	-1.465	5.365	58.63	1	0
HMGB3	ENSG00000029993	protein_coding	-0.842804	3.56	48.84	1	0
NUP160	ENSG00000030066	protein_coding	-1.06595	5.376	58.14	1	0
BAK1	ENSG00000030110	protein_coding	0.759809	2.212	42.82	0	0
MUSK	ENSG00000030304	protein_coding	#N/A	3.344	63.55	0	0
IKZF2	ENSG00000030419	protein_coding	-0.63743	9.35	65.16	0	0
GRN	ENSG00000030582	protein_coding	1.01544	2.342	42.36	0	0
FAM13B	ENSG00000031003	protein_coding	-4.26053	5.465	59.95	0	0
ARHGAP31	ENSG00000031081	protein_coding	-0.851677	9.317	56.56	0	0
CENPQ	ENSG00000031691	protein_coding	0.0425047	1.733	62.01	1	0
SARS	ENSG00000031698	protein_coding	-0.436837	1.882	56.88	0	0
RANBP3	ENSG00000031823	protein_coding	0.669402	3.233	47.26	0	0
ARID4A	ENSG00000032219	protein_coding	-1.46695	5.891	62.52	0	0
TSSC1	ENSG00000032389	protein_coding	-0.755935	2.932	51.73	0	0
PNPLA6	ENSG00000032444	protein_coding	-0.55793	4.617	44.12	0	0
IFT88	ENSG00000032742	protein_coding	0.0198539	3.091	61.26	0	0
ALG1	ENSG00000033011	protein_coding	-0.327575	2.671	50.72	0	0
ZCCHC8	ENSG00000033030	protein_coding	-0.697575	5.663	57.32	0	0
ABCF2	ENSG00000033050	protein_coding	-0.63062	3.546	50.81	0	0
CHPF2	ENSG00000033100	protein_coding	-0.726352	3.978	43.18	0	0
LRRC7	ENSG00000033122	protein_coding	#N/A	6.507	64.65	0	0
FUT8	ENSG00000033170	protein_coding	-2.12474	5.166	62.59	0	0
UBA6	ENSG00000033178	protein_coding	-0.564175	9.564	64.48	0	0
GAB2	ENSG00000033327	protein_coding	#N/A	6.092	58.29	0	0
ATP6V0A1	ENSG00000033627	protein_coding	-0.38267	4.652	54.53	0	0
PIAS1	ENSG00000033800	protein_coding	0.117866	8.115	61.91	0	0
SLC4A7	ENSG00000033867	protein_coding	-1.2511	7.97	63.15	0	0
APBA2	ENSG00000034053	protein_coding	-0.812721	4.031	51.37	0	0
MAP2K3	ENSG00000034152	protein_coding	-0.155178	2.401	43.03	0	0
EFCAB1	ENSG00000034239	protein_coding	#N/A	2.286	59.91	0	0
TMSB10	ENSG00000034510	protein_coding	3.07039	0.496	36.63	0	0
ASTE1	ENSG00000034533	protein_coding	-0.429219	2.669	60.3	0	0
RNF19A	ENSG00000034677	protein_coding	-1.54635	4.33	61.39	0	0
PEX3	ENSG00000034693	protein_coding	-0.338416	1.969	64.89	0	0
GABARAPL2	ENSG00000034713	protein_coding	0.98397	2.274	52.82	0	0
MYOC	ENSG00000034971	protein_coding	#N/A	2.095	54.29	0	0
SH3YL1	ENSG00000035115	protein_coding	-1.79837	3.54	59.22	0	0
FAM136A	ENSG00000035141	protein_coding	0.766624	2.398	51.54	0	0
VCL	ENSG00000035403	protein_coding	0.0327479	7.995	58.55	1	0
DEPDC1B	ENSG00000035499	protein_coding	-0.965366	2.499	61.37	1	0
DAPK2	ENSG00000035664	protein_coding	#N/A	8.086	53.11	0	0
NSMAF	ENSG00000035681	protein_coding	-2.5417	3.569	61.59	0	0
ADSS	ENSG00000035687	protein_coding	-1.18166	2.78	61.7	0	0
STAP1	ENSG00000035720	protein_coding	#N/A	1.511	62.2	0	0
TIMP2	ENSG00000035862	protein_coding	1.73073	3.652	47.4	0	0
RFC1	ENSG00000035928	protein_coding	-1.09637	4.886	60.74	0	0
TBC1D23	ENSG00000036054	protein_coding	-0.735434	4.054	63.54	0	0
CUL3	ENSG00000036257	protein_coding	-0.082619	6.741	62.77	1	0
MYOM2	ENSG00000036448	protein_coding	-0.0455147	5.014	53.36	0	0
OTC	ENSG00000036473	protein_coding	#N/A	1.585	60.7	0	0
CYP46A1	ENSG00000036530	protein_coding	#N/A	6.609	52.72	0	0
ZZZ3	ENSG00000036549	protein_coding	-3.40892	4.737	62.83	0	0
SLC18A1	ENSG00000036565	protein_coding	#N/A	2.956	56	0	0
USP2	ENSG00000036672	protein_coding	-0.141661	3.732	45.36	0	0
CASR.1	ENSG00000036828	protein_coding	#N/A	5.011	59.12	0	0
TUBG2	ENSG00000037042	protein_coding	0.367262	1.776	48.1	0	0
RPL26L1	ENSG00000037241	protein_coding	0.711955	0.742	53.88	0	0
FLT4	ENSG00000037280	protein_coding	-0.441649	5.857	39.76	0	0
NSUN2	ENSG00000037474	protein_coding	-0.102952	3.558	56.71	1	0
FBXO42	ENSG00000037637	protein_coding	-0.516158	6.202	56.15	0	0
MFAP3	ENSG00000037749	protein_coding	-0.181055	2.891	56.46	1	0
MRI1	ENSG00000037757	protein_coding	-0.18303	3.027	47.84	0	0
METTL1	ENSG00000037897	protein_coding	0.922939	2.066	45.78	0	0
HOXC8	ENSG00000037965	protein_coding	1.40484	1.889	47.22	0	0
AGA	ENSG00000038002	protein_coding	0.0995357	2.107	60.11	0	0
PI4K2B	ENSG00000038210	protein_coding	-1.13693	3.54	58.18	0	0
BOD1L1	ENSG00000038219	protein_coding	-1.65764	10.565	61.12	0	0
MAT2B	ENSG00000038274	protein_coding	0.538023	3.409	61.75	1	0
TLL1	ENSG00000038295	protein_coding	-4.52356	6.708	64.28	0	0
EDC4	ENSG00000038358	protein_coding	0.0684676	5.267	42.68	0	0
TRIO	ENSG00000038382	protein_coding	-2.08479	11.1	56.65	0	0
VCAN	ENSG00000038427	protein_coding	-0.476951	12.625	62.78	0	0
CLEC16A	ENSG00000038532	protein_coding	-1.79989	6.891	51.94	0	0
MSR1	ENSG00000038945	protein_coding	#N/A	3.572	64.48	0	0
CDH1	ENSG00000039068	protein_coding	#N/A	4.889	53.11	0	0
SKIV2L2	ENSG00000039123	protein_coding	-0.747989	4.192	63.15	1	0
DNAH5	ENSG00000039139	protein_coding	#N/A	15.633	61.03	0	0
ZFYVE16	ENSG00000039319	protein_coding	-0.989229	6.773	62.35	1	0
FAM65A	ENSG00000039523	protein_coding	1.18107	4.26	42.95	0	0
C6	ENSG00000039537	protein_coding	#N/A	3.661	63.32	0	0
RAI14	ENSG00000039560	protein_coding	0.482468	5.092	57.87	1	0
SOX30	ENSG00000039600	protein_coding	#N/A	3.265	59.29	0	0
PNKP	ENSG00000039650	protein_coding	-1.32079	2.111	40.47	0	0
BEST2	ENSG00000039987	protein_coding	#N/A	2.183	42.05	0	0
PHLPP2	ENSG00000040199	protein_coding	-1.87129	8.467	58.18	0	0
SPDL1	ENSG00000040275	protein_coding	-0.933149	2.668	62.72	1	0
STAU2	ENSG00000040341	protein_coding	-0.656847	4.061	61.75	0	0
PQLC2	ENSG00000040487	protein_coding	1.2555	2.153	45.07	0	0
CTNS	ENSG00000040531	protein_coding	0.445626	2.866	45.73	0	0
RTN4R	ENSG00000040608	protein_coding	#N/A	2.157	39.55	0	0
PHF23	ENSG00000040633	protein_coding	-0.336267	2.037	40.49	0	0
CDH10	ENSG00000040731	protein_coding	#N/A	3.438	66	0	0
INPP4A	ENSG00000040933	protein_coding	-1.64316	9.996	52.67	0	0
RAB27B	ENSG00000041353	protein_coding	#N/A	7.281	62.26	0	0
PSMA4	ENSG00000041357	protein_coding	-0.0577812	4.411	57.68	1	0
MYO16	ENSG00000041515	protein_coding	#N/A	7.436	61.52	0	0
LSG1	ENSG00000041802	protein_coding	-0.612802	3.572	58.31	0	0
PARP3	ENSG00000041880	protein_coding	-3.3837	2.472	40.79	0	0
TNC	ENSG00000041982	protein_coding	#N/A	7.641	58.15	0	0
THAP3	ENSG00000041988	protein_coding	0.372201	2.053	43.23	0	0
FAM65C	ENSG00000042062	protein_coding	#N/A	4.377	48.4	0	0
TDP1	ENSG00000042088	protein_coding	-0.940558	3.702	57.86	0	0
AIFM2	ENSG00000042286	protein_coding	2.60459	3.247	49.75	0	0
C2orf83	ENSG00000042304	protein_coding	#N/A	2.086	56.82	0	0
SPATA7	ENSG00000042317	protein_coding	-1.43244	3.61	62.1	0	0
MED17	ENSG00000042429	protein_coding	-0.359717	4.874	60.19	1	0
RETSAT	ENSG00000042445	protein_coding	-0.357295	3.1	48.3	0	0
CAPG	ENSG00000042493	protein_coding	-1.86507	1.442	48.68	0	0
AP2S1	ENSG00000042753	protein_coding	0.324883	0.935	47.13	0	0
USH2A	ENSG00000042781	protein_coding	#N/A	18.883	63.64	0	0
ZPBP	ENSG00000042813	protein_coding	#N/A	1.213	63.62	0	0
TG	ENSG00000042832	protein_coding	#N/A	8.45	54.1	0	0
ADAM28	ENSG00000042980	protein_coding	#N/A	7.052	64.29	0	0
BARX2	ENSG00000043039	protein_coding	#N/A	2.148	57.27	0	0
DCUN1D1	ENSG00000043093	protein_coding	0.203872	7.954	60.44	0	0
JADE2	ENSG00000043143	protein_coding	#N/A	6.465	46.21	0	0
ZIC2	ENSG00000043355	protein_coding	1.84415	2.983	43.4	0	0
LCP2	ENSG00000043462	protein_coding	#N/A	4.678	55.36	0	0
TRIT1	ENSG00000043514	protein_coding	-0.537421	2.112	57.54	0	0
ADRB1	ENSG00000043591	protein_coding	#N/A	2.853	42.55	0	0
GUCA2B	ENSG00000044012	protein_coding	#N/A	0.597	40.06	0	0
CUL7	ENSG00000044090	protein_coding	0.0358363	5.504	45.3	0	0
CTNNA1	ENSG00000044115	protein_coding	0.91468	3.831	55.85	1	0
PHKA2	ENSG00000044446	protein_coding	-0.661483	5.559	54.25	0	0
CNTLN	ENSG00000044459	protein_coding	-1.08918	5.576	63.57	0	0
EPHA3	ENSG00000044524	protein_coding	-0.785713	5.809	65.4	0	0
HSPA5	ENSG00000044574	protein_coding	0.428601	3.908	56.02	0	0
DSG2	ENSG00000046604	protein_coding	0.0530652	5.831	60.73	0	0
GEMIN8	ENSG00000046647	protein_coding	1.57898	1.682	59.21	0	0
OFD1	ENSG00000046651	protein_coding	-1.82562	4.259	60.2	0	0
GPM6B	ENSG00000046653	protein_coding	1.71921	3.957	58.5	0	0
MAGEC2	ENSG00000046774	protein_coding	#N/A	1.991	48.23	0	0
PREX2	ENSG00000046889	protein_coding	-0.406475	10.75	62.84	0	0
WDR37	ENSG00000047056	protein_coding	-0.441435	4.582	54.5	0	0
YTHDC2	ENSG00000047188	protein_coding	-0.543945	6.708	65.33	0	0
CTPS2	ENSG00000047230	protein_coding	-0.730695	4.319	56.49	0	0
ATP6V1H	ENSG00000047249	protein_coding	-0.00306793	2.365	60.8	1	0
POLR2B	ENSG00000047315	protein_coding	-0.754471	4.108	59.81	1	0
FAM214A	ENSG00000047346	protein_coding	-0.49445	4.59	62.79	0	0
ARAP2	ENSG00000047365	protein_coding	-1.49679	7.514	64.47	0	0
TPR	ENSG00000047410	protein_coding	-2.20807	9.708	65.84	0	0
CP	ENSG00000047457	protein_coding	#N/A	4.676	62.65	0	0
KIAA0556	ENSG00000047578	protein_coding	-1.76799	6.616	52.16	0	0
DTNBP1	ENSG00000047579	protein_coding	1.06723	1.88	60.07	0	0
XK	ENSG00000047597	protein_coding	0.173648	5.206	60.46	0	0
ANO2	ENSG00000047617	protein_coding	#N/A	3.72	55.6	0	0
C12orf4	ENSG00000047621	protein_coding	0.010656	3.826	63.45	0	0
SCML1	ENSG00000047634	protein_coding	0.924808	4.615	61.11	0	0
WWC3	ENSG00000047644	protein_coding	#N/A	6.647	53.79	0	0
ARHGAP6	ENSG00000047648	protein_coding	#N/A	6.299	60.89	0	0
FAM184B	ENSG00000047662	protein_coding	#N/A	6.622	55.95	0	0
MAP4	ENSG00000047849	protein_coding	0.158266	8.92	56.57	0	0
GOPC	ENSG00000047932	protein_coding	#N/A	4.59	63.34	0	0
ROS1	ENSG00000047936	protein_coding	#N/A	7.435	62.76	0	0
USP28	ENSG00000048028	protein_coding	-1.5552	4.669	58.55	0	0
HDAC9	ENSG00000048052	protein_coding	#N/A	9.705	63.87	0	0
TSPAN17	ENSG00000048140	protein_coding	-2.26388	4.445	41.3	0	0
NOP16	ENSG00000048162	protein_coding	-0.701483	1.258	50.67	0	0
CC2D2A	ENSG00000048342	protein_coding	-1.20286	5.249	59.79	0	0
RRM2B	ENSG00000048392	protein_coding	0.288554	4.931	62.01	0	0
ZNF800	ENSG00000048405	protein_coding	-0.720361	4.358	62.2	0	0
TNFRSF17	ENSG00000048462	protein_coding	#N/A	0.994	59.52	0	0
SNX29	ENSG00000048471	protein_coding	-2.795	8.171	52.87	0	0
LMO3	ENSG00000048540	protein_coding	#N/A	3.81	64.37	0	0
MRPS10	ENSG00000048544	protein_coding	1.132	2.11	58.96	0	0
GUCA1A	ENSG00000048545	protein_coding	#N/A	2.233	48.77	0	0
RSF1	ENSG00000048649	protein_coding	-1.11788	11.55	60.96	0	0
VPS13D	ENSG00000048707	protein_coding	-2.45783	16.32	57.66	0	0
CELF2	ENSG00000048740	protein_coding	2.59413	8.044	58.09	0	0
FAM120A	ENSG00000048828	protein_coding	-1.13284	5.118	57.6	1	0
R3HDM1	ENSG00000048991	protein_coding	-2.10529	4.648	62.02	0	0
COL9A2	ENSG00000049089	protein_coding	#N/A	2.887	42.57	0	0
KITLG	ENSG00000049130	protein_coding	0.252643	5.191	63.16	0	0
ERCC8	ENSG00000049167	protein_coding	-2.28011	3.424	62.84	0	0
ADAMTS6	ENSG00000049192	protein_coding	-3.45943	7.311	64.09	0	0
H6PD	ENSG00000049239	protein_coding	-0.0449124	9.146	47.71	0	0
VAMP3	ENSG00000049245	protein_coding	0.751877	2.205	57.23	0	0
PER3	ENSG00000049246	protein_coding	-0.485427	6.318	59.47	0	0
UTS2	ENSG00000049247	protein_coding	#N/A	1.601	59.19	0	0
TNFRSF9	ENSG00000049249	protein_coding	#N/A	5.97	56.05	0	0
EPN3	ENSG00000049283	protein_coding	#N/A	4.071	41.29	0	0
LTBP1	ENSG00000049323	protein_coding	-0.360128	6.333	59.75	0	0
RCN1	ENSG00000049449	protein_coding	-0.44679	2.653	56.62	0	0
ELN	ENSG00000049540	protein_coding	#N/A	3.967	45.05	0	0
RFC2	ENSG00000049541	protein_coding	-0.145061	1.695	51.04	0	0
ARID1B	ENSG00000049618	protein_coding	-1.23163	10.194	59.13	0	0
CLPTM1L	ENSG00000049656	protein_coding	-0.966924	3.54	43.83	0	0
NEDD4L	ENSG00000049759	protein_coding	1.10253	8.436	56.64	0	0
FOXP3	ENSG00000049768	protein_coding	#N/A	2.448	46.49	0	0
PPP1R3F	ENSG00000049769	protein_coding	-0.683143	3.421	52.15	0	0
HEXB	ENSG00000049860	protein_coding	-0.608809	2.021	57.89	0	0
PTCD2	ENSG00000049883	protein_coding	-0.674759	11.151	59.62	0	0
KIAA2022	ENSG00000050030	protein_coding	-5.70044	11.719	60.51	0	0
JKAMP	ENSG00000050130	protein_coding	0.0550876	2.524	63.22	0	0
DKK3	ENSG00000050165	protein_coding	#N/A	2.65	50.82	0	0
ARHGEF5	ENSG00000050327	protein_coding	#N/A	5.544	51.94	0	0
NFE2L3	ENSG00000050344	protein_coding	0.631727	3.686	55.36	0	1
MCUR1	ENSG00000050393	protein_coding	-0.667991	5.471	58.76	0	0
LIMA1	ENSG00000050405	protein_coding	1.32256	3.92	57.68	0	0
LETMD1	ENSG00000050426	protein_coding	0.263485	2.948	54.66	0	0
SLC4A8	ENSG00000050438	protein_coding	-0.742504	11.824	57.28	0	0
LAMC3	ENSG00000050555	protein_coding	1.47846	6.133	46.31	0	0
PTGER3	ENSG00000050628	protein_coding	#N/A	6.982	61.95	0	0
TNIP3	ENSG00000050730	protein_coding	#N/A	2.416	62.86	0	0
MAPK9	ENSG00000050748	protein_coding	-0.558636	4.815	56.42	0	0
COL23A1	ENSG00000050767	protein_coding	#N/A	3.061	49.38	0	0
BCAR1	ENSG00000050820	protein_coding	0.0429466	4.659	40.3	0	0
FAM160A2	ENSG00000051009	protein_coding	-1.60716	3.481	55.45	0	0
HERPUD1	ENSG00000051108	protein_coding	0.117133	2.946	56.84	0	0
HOMER3	ENSG00000051128	protein_coding	0.0749621	1.979	43.23	0	0
RAD51	ENSG00000051180	protein_coding	0.456434	2.449	56.53	0	0
POLQ	ENSG00000051341	protein_coding	-3.09215	9.055	60.94	0	0
PIK3CB	ENSG00000051382	protein_coding	-1.70334	5.919	59.41	0	0
CYBA	ENSG00000051523	protein_coding	1.2178	1.415	38.11	0	0
THOC3	ENSG00000051596	protein_coding	-0.53716	1.796	56.99	0	0
HEBP2	ENSG00000051620	protein_coding	-0.0502586	10.014	52.88	0	0
MPHOSPH9	ENSG00000051825	protein_coding	-2.82526	6.351	57.01	0	0
PLEKHA5	ENSG00000052126	protein_coding	-0.256865	6.487	61.91	0	0
PRSS8	ENSG00000052344	protein_coding	#N/A	1.872	40.95	0	0
SIKE1	ENSG00000052723	protein_coding	-0.7398	5.506	63.1	0	0
RRP12	ENSG00000052749	protein_coding	-0.0370442	4.476	49.51	0	0
FNIP2	ENSG00000052795	protein_coding	-1.70695	6.925	59.44	0	0
MSMO1	ENSG00000052802	protein_coding	0.442737	2.269	62.9	0	0
TTC17	ENSG00000052841	protein_coding	-1.66881	4.469	62.11	0	0
ALX4	ENSG00000052850	protein_coding	-0.0824622	5.75	47.16	0	0
FSTL4	ENSG00000053108	protein_coding	#N/A	5.419	53.31	0	0
FOXN3	ENSG00000053254	protein_coding	-1.36257	7.832	55.69	0	0
METTL24	ENSG00000053328	protein_coding	#N/A	1.119	59.36	0	0
AKR7A2	ENSG00000053371	protein_coding	0.835043	1.362	47.13	0	0
MRTO4	ENSG00000053372	protein_coding	0.448062	2.315	46.51	1	0
NNAT	ENSG00000053438	protein_coding	#N/A	1.297	45.95	0	0
USE1	ENSG00000053501	protein_coding	0.318682	1.776	44.74	0	0
MCF2L2	ENSG00000053524	protein_coding	#N/A	7.813	57.61	0	0
NRIP2	ENSG00000053702	protein_coding	#N/A	2.746	48.61	0	0
LAMA3	ENSG00000053747	protein_coding	-2.48409	10.661	57.54	0	0
AP5M1	ENSG00000053770	protein_coding	-1.56694	11.737	64.83	0	0
ANAPC4	ENSG00000053900	protein_coding	-0.597195	3.807	62.03	0	0
KCNQ1	ENSG00000053918	protein_coding	#N/A	3.245	48.45	0	0
TRAPPC3	ENSG00000054116	protein_coding	0.65138	2.428	50.2	0	0
THRAP3	ENSG00000054118	protein_coding	-0.589543	4.432	56.28	1	0
PHPT1	ENSG00000054148	protein_coding	1.22184	1.316	33.77	0	0
ENTPD2	ENSG00000054179	protein_coding	#N/A	2.095	34.26	0	0
LY75	ENSG00000054219	protein_coding	#N/A	6.886	62.03	0	0
ARID4B	ENSG00000054267	protein_coding	-1.90371	6.067	60.05	1	0
OPN3	ENSG00000054277	protein_coding	-0.650416	2.62	60.38	0	0
SDCCAG8	ENSG00000054282	protein_coding	-2.0424	2.567	60.19	0	0
PTPRN	ENSG00000054356	protein_coding	#N/A	5.099	46.41	0	0
HHAT	ENSG00000054392	protein_coding	-0.408806	3.626	57.74	0	0
KIF1B	ENSG00000054523	protein_coding	-0.642972	10.669	58.01	0	0
FOXC1	ENSG00000054598	protein_coding	1.7178	3.926	43.68	0	0
TBC1D22A	ENSG00000054611	protein_coding	-0.107149	3.934	50.58	0	0
SYNE2	ENSG00000054654	protein_coding	-2.61248	21.842	59.24	0	0
PLEKHH1	ENSG00000054690	protein_coding	-1.40871	6.604	51.98	0	0
ATP9A	ENSG00000054793	protein_coding	-0.441296	8.106	53.31	0	0
SPO11	ENSG00000054796	protein_coding	#N/A	1.834	63.22	0	0
CBLN4	ENSG00000054803	protein_coding	#N/A	3.024	55.99	0	0
CHRDL2	ENSG00000054938	protein_coding	#N/A	1.971	48.43	0	0
FAM168A	ENSG00000054965	protein_coding	2.79099	7.296	58.45	0	0
RELT	ENSG00000054967	protein_coding	-0.727474	4.346	40.16	0	0
GALC	ENSG00000054983	protein_coding	0.544321	3.883	60.88	0	0
NOP58	ENSG00000055044	protein_coding	-1.31632	2.046	58.85	0	0
SZRD1	ENSG00000055070	protein_coding	0.147479	3.636	51.9	1	0
KCNH2	ENSG00000055118	protein_coding	#N/A	4.286	40.43	0	0
CUL1	ENSG00000055130	protein_coding	-0.6344	3.064	58.78	0	0
FAM114A2	ENSG00000055147	protein_coding	-0.201169	4.443	62.65	0	0
CYFIP2	ENSG00000055163	protein_coding	0.673292	6.37	55.71	0	0
TAB2	ENSG00000055208	protein_coding	-0.0269951	4.553	61.13	0	0
GINM1	ENSG00000055211	protein_coding	-0.481365	2.024	57.95	0	0
EIF2AK2	ENSG00000055332	protein_coding	0.250207	10.042	58.86	0	0
USP36	ENSG00000055483	protein_coding	-1.02683	6.063	49.97	0	0
KMT2C	ENSG00000055609	protein_coding	-2.32116	16.862	61.35	0	0
MCOLN3	ENSG00000055732	protein_coding	0.143814	2.953	59.23	0	0
CCDC85A	ENSG00000055813	protein_coding	#N/A	3.982	61.51	0	0
PUM2	ENSG00000055917	protein_coding	-1.27281	6.251	62.58	1	0
MRPL43	ENSG00000055950	protein_coding	2.26373	2.134	46.82	0	0
ITIH4	ENSG00000055955	protein_coding	-4.88264	3.336	44.35	0	0
ITIH1	ENSG00000055957	protein_coding	#N/A	2.911	45.08	0	0
HPF1	ENSG00000056050	protein_coding	#N/A	1.23	61.4	0	0
ZFR	ENSG00000056097	protein_coding	-0.305348	4.738	61.67	1	0
ZNF280C	ENSG00000056277	protein_coding	-1.06274	4.634	61.97	0	0
NPFFR2	ENSG00000056291	protein_coding	#N/A	1.922	63.23	0	0
PHF21B	ENSG00000056487	protein_coding	#N/A	3.671	47.27	0	0
TRAF1	ENSG00000056558	protein_coding	#N/A	6.324	50.05	0	0
RC3H2	ENSG00000056586	protein_coding	-2.69006	9.248	59.5	1	0
IL17RB	ENSG00000056736	protein_coding	-1.19199	2.822	54.63	0	0
TRAF3IP2	ENSG00000056972	protein_coding	0.910297	5.128	55.55	0	0
GYG2	ENSG00000056998	protein_coding	-7.92481	3.393	56.33	0	0
DCBLD2	ENSG00000057019	protein_coding	-1.71995	6.122	61.42	1	0
SERPINB3	ENSG00000057149	protein_coding	#N/A	1.777	61.95	0	0
SOAT1	ENSG00000057252	protein_coding	-0.203909	6.861	60.37	0	0
PKP2	ENSG00000057294	protein_coding	1.35333	4.302	59.2	0	0
MSH4	ENSG00000057468	protein_coding	#NUM!	3.266	62.99	0	0
F7	ENSG00000057593	protein_coding	#N/A	3.109	38.64	0	0
GDI2	ENSG00000057608	protein_coding	0.56308	2.499	56.26	0	0
PRDM1	ENSG00000057657	protein_coding	#N/A	5.164	58.71	0	0
ATG5	ENSG00000057663	protein_coding	-0.640235	3.216	60.38	0	0
TMCC3	ENSG00000057704	protein_coding	#N/A	5.877	56.89	0	0
PITHD1	ENSG00000057757	protein_coding	0.864918	1.603	55.41	0	0
MTA3	ENSG00000057935	protein_coding	0.512689	5.832	56.92	0	0
USP13	ENSG00000058056	protein_coding	0.107098	8.323	57.27	1	0
ATP11B	ENSG00000058063	protein_coding	-1.08482	7.325	63.98	0	0
LAMC2	ENSG00000058085	protein_coding	#N/A	5.147	56.72	0	0
CDK14	ENSG00000058091	protein_coding	-0.910601	5.163	62.03	0	0
SEC61A1	ENSG00000058262	protein_coding	1.32554	3.635	52.7	0	0
PPP1R12A	ENSG00000058272	protein_coding	-0.144412	5.721	63.93	0	0
RASGRF1	ENSG00000058335	protein_coding	#N/A	6.294	50.05	0	0
CAMK2B	ENSG00000058404	protein_coding	#N/A	4.447	44.83	0	0
CROCC	ENSG00000058453	protein_coding	-0.94669	6.656	50.86	0	0
POLR3E	ENSG00000058600	protein_coding	-2.00763	4.8	48.33	0	0
ATP2B4	ENSG00000058668	protein_coding	-2.74129	8.968	53.5	0	0
ZC3H11A	ENSG00000058673	protein_coding	-2.15845	8.404	59.15	0	0
RIOK2	ENSG00000058729	protein_coding	-0.232255	3.922	63.29	1	0
YIPF1	ENSG00000058799	protein_coding	0.38405	1.851	56.54	0	0
NDC1	ENSG00000058804	protein_coding	-0.290393	5.134	59.74	0	0
DGKG	ENSG00000058866	protein_coding	#N/A	6.054	55.3	0	0
FLYWCH1	ENSG00000059122	protein_coding	-1.14155	5.037	47.67	0	0
UNKL	ENSG00000059145	protein_coding	0.379087	5.116	42.18	0	0
TBXAS1	ENSG00000059377	protein_coding	#N/A	2.505	55.2	0	0
PARP12	ENSG00000059378	protein_coding	#N/A	3.796	54.19	0	0
ALDH18A1	ENSG00000059573	protein_coding	-1.14882	3.359	56.84	0	0
TARBP1	ENSG00000059588	protein_coding	-2.46377	5.13	59.73	0	0
GATB	ENSG00000059691	protein_coding	#N/A	6.552	56.19	0	0
MXD1	ENSG00000059728	protein_coding	1.18982	5.587	59.26	0	1
CDK17	ENSG00000059758	protein_coding	0.354155	4.157	62.18	0	0
DNAJC25	ENSG00000059769	protein_coding	-2.13313	2.572	57.26	0	0
SLC2A3	ENSG00000059804	protein_coding	#N/A	4.414	55.37	0	0
PSD	ENSG00000059915	protein_coding	#N/A	4.183	40.33	0	0
CTDP1	ENSG00000060069	protein_coding	-0.16135	5.866	46.48	0	0
YBX3	ENSG00000060138	protein_coding	0.440212	6.393	60.91	0	1
STYK1	ENSG00000060140	protein_coding	#N/A	2.995	60.56	0	0
WNK1	ENSG00000060237	protein_coding	-0.654151	11.804	61.28	0	0
CCAR1	ENSG00000060339	protein_coding	-1.10387	4.683	58.25	0	0
OGFR	ENSG00000060491	protein_coding	0.0748614	4.506	36.55	0	0
GNA15	ENSG00000060558	protein_coding	#N/A	2.133	47.45	0	0
CREB3L3	ENSG00000060566	protein_coding	#N/A	2.618	47.29	0	0
PIGV	ENSG00000060642	protein_coding	-0.878321	2.713	51.66	0	0
PTPRU	ENSG00000060656	protein_coding	-1.94408	5.579	48.42	0	0
SNRNP40	ENSG00000060688	protein_coding	-2.54674	1.928	57.99	0	0
RIMBP2	ENSG00000060709	protein_coding	#N/A	6.321	49.62	0	0
COL11A1	ENSG00000060718	protein_coding	#N/A	7.327	66.87	0	0
QSER1	ENSG00000060749	protein_coding	-2.05813	9.335	61.46	0	0
MPC1	ENSG00000060762	protein_coding	-0.329622	1.192	61.07	0	0
ACAA1	ENSG00000060971	protein_coding	0.189677	4.72	48.54	0	0
BCAT1	ENSG00000060982	protein_coding	0.709634	9.674	59.94	0	0
HDAC7	ENSG00000061273	protein_coding	1.3168	6.414	45.12	0	0
LZTS1	ENSG00000061337	protein_coding	#N/A	5.706	49.57	0	0
PRDM6	ENSG00000061455	protein_coding	0.892144	9.267	59.81	0	0
WNT8A	ENSG00000061492	protein_coding	#N/A	1.597	52.03	0	0
SPAG4	ENSG00000061656	protein_coding	#N/A	1.453	40.6	0	0
NCKAP1	ENSG00000061676	protein_coding	-0.902221	20.347	64.18	0	0
MRPS35	ENSG00000061794	protein_coding	0.695598	1.888	61.36	0	0
GUCY1B3	ENSG00000061918	protein_coding	1.41741	3.124	63.48	0	0
SFSWAP	ENSG00000061936	protein_coding	-0.528366	5.593	53.55	0	0
TNK2	ENSG00000061938	protein_coding	-1.66626	5.94	41.73	0	0
MON2	ENSG00000061987	protein_coding	-0.565029	13.275	63.79	0	0
CDH3	ENSG00000062038	protein_coding	#N/A	4.929	50.74	0	0
ARSF	ENSG00000062096	protein_coding	#N/A	2.164	59.27	0	0
GPBP1	ENSG00000062194	protein_coding	-2.62692	4.683	59.98	1	0
DGAT2	ENSG00000062282	protein_coding	#N/A	5.926	47.98	0	0
ZNF112	ENSG00000062370	protein_coding	#N/A	3.654	61.69	0	0
CS	ENSG00000062485	protein_coding	1.16814	3.057	53.84	0	0
LTK	ENSG00000062524	protein_coding	#N/A	3.444	42.1	0	0
MRPS24	ENSG00000062582	protein_coding	0.0976711	1.727	49.07	0	0
ELMO2	ENSG00000062598	protein_coding	0.0945379	4.121	55.85	1	0
WAPL	ENSG00000062650	protein_coding	#N/A	6.333	60.13	1	0
VMP1	ENSG00000062716	protein_coding	0.440781	4.325	60.25	0	1
APPBP2	ENSG00000062725	protein_coding	-0.0951357	6.478	60.31	1	0
POLD1	ENSG00000062822	protein_coding	-0.718454	3.542	44.94	0	0
SEZ6	ENSG00000063015	protein_coding	#N/A	4.471	45.79	0	0
EIF4B	ENSG00000063046	protein_coding	-1.64732	4.148	57.2	0	0
SLC6A16	ENSG00000063127	protein_coding	#N/A	2.983	56.93	0	0
GLTSCR1	ENSG00000063169	protein_coding	0.407	5.739	48.1	0	0
SPHK2	ENSG00000063176	protein_coding	-0.311708	3.085	43.22	0	0
RPL18	ENSG00000063177	protein_coding	-0.417023	3.844	43.17	0	0
CA11	ENSG00000063180	protein_coding	-0.941897	1.844	46.17	0	0
ISOC2	ENSG00000063241	protein_coding	-0.0849603	2.283	43.31	0	0
U2AF2	ENSG00000063244	protein_coding	0.366339	3.022	43.97	1	0
EPN1	ENSG00000063245	protein_coding	0.285732	16.219	45.15	0	0
MED29	ENSG00000063322	protein_coding	3.09207	3.653	47.64	0	0
AHRR	ENSG00000063438	protein_coding	-3.52878	5.661	47.73	0	0
GSC2	ENSG00000063515	protein_coding	#N/A	1.033	29.33	0	0
ZNF275	ENSG00000063587	protein_coding	-0.34825	6.32	50.92	0	0
MTMR1	ENSG00000063601	protein_coding	-0.967316	4.516	57.52	0	0
GPC1	ENSG00000063660	protein_coding	0.50772	3.713	35.37	0	0
ADCK1	ENSG00000063761	protein_coding	-0.684843	3.56	52.37	0	0
HAGH	ENSG00000063854	protein_coding	0.409916	2.984	46.67	0	0
RNF4	ENSG00000063978	protein_coding	-0.285561	4.123	52.62	0	0
CASP8	ENSG00000064012	protein_coding	2.22882	2.93	56.1	0	0
LIMCH1	ENSG00000064042	protein_coding	-0.284839	6.165	59.5	1	0
ASUN	ENSG00000064102	protein_coding	-1.11349	2.974	63.62	0	0
TM7SF3	ENSG00000064115	protein_coding	-0.720937	2.709	59.49	0	0
DLX3	ENSG00000064195	protein_coding	#N/A	2.602	42.59	0	0
SPA17	ENSG00000064199	protein_coding	-0.196191	4.949	62.03	0	0
TSPAN32	ENSG00000064201	protein_coding	#N/A	3.325	36.97	0	0
WISP2	ENSG00000064205	protein_coding	#N/A	2.759	48.54	0	0
DMRT3	ENSG00000064218	protein_coding	#N/A	2.183	56.27	0	0
ST3GAL6	ENSG00000064225	protein_coding	-1.36751	3.571	61.12	0	0
ATP2C2	ENSG00000064270	protein_coding	#N/A	3.6	51.17	0	0
NGFR	ENSG00000064300	protein_coding	#N/A	3.417	43.26	0	0
CDON	ENSG00000064309	protein_coding	-1.69119	9.138	60.05	0	0
TAF2	ENSG00000064313	protein_coding	-1.67001	5.048	62.5	0	0
HIPK2	ENSG00000064393	protein_coding	-0.698421	15.049	54.38	0	0
TNPO3	ENSG00000064419	protein_coding	-0.563071	4.514	60.2	0	0
BORCS8-MEF2B	ENSG00000064489	protein_coding	#N/A	1.804	45.45	0	0
RFXANK	ENSG00000064490	protein_coding	-0.277825	1.407	45.34	0	0
TMEM161A	ENSG00000064545	protein_coding	0.0649073	1.93	48.4	0	0
LPAR2	ENSG00000064547	protein_coding	#N/A	2.546	41.04	0	0
CTSA	ENSG00000064601	protein_coding	0.561084	3.056	43.96	0	0
SUGP2	ENSG00000064607	protein_coding	-1.3965	6.176	50	0	0
SLC12A2	ENSG00000064651	protein_coding	0.201869	6.885	64.76	1	0
SNX24	ENSG00000064652	protein_coding	0.205749	2.158	59.68	0	0
EYA2	ENSG00000064655	protein_coding	2	2.702	54.56	0	0
CNN2	ENSG00000064666	protein_coding	2.34956	2.266	40.27	0	0
ABCA7	ENSG00000064687	protein_coding	-1.38622	6.816	39.51	0	0
SNCAIP	ENSG00000064692	protein_coding	#N/A	4.986	60.74	0	0
DDX20	ENSG00000064703	protein_coding	-0.408513	4.332	59.76	1	0
BTBD1	ENSG00000064726	protein_coding	-1.04353	3.297	60.47	1	0
FAR2	ENSG00000064763	protein_coding	0.364852	3.616	61.1	0	0
BCAS1	ENSG00000064787	protein_coding	#N/A	6.112	59.27	0	0
POU1F1	ENSG00000064835	protein_coding	#N/A	1.491	67.61	0	0
CHI3L2	ENSG00000064886	protein_coding	#N/A	2.169	55.36	0	0
SBNO2	ENSG00000064932	protein_coding	-0.82103	4.923	36.82	0	0
PMS1	ENSG00000064933	protein_coding	-1.27713	3.417	63.19	0	0
HMG20B	ENSG00000064961	protein_coding	-1.93411	2.434	34.66	0	0
CALCRL	ENSG00000064989	protein_coding	#N/A	5.223	66.91	0	0
TAF11	ENSG00000064995	protein_coding	-0.521079	1.58	58.51	1	0
ANKS1A	ENSG00000064999	protein_coding	0.0393487	6.347	55.07	0	0
AP3D1	ENSG00000065000	protein_coding	0.104471	5.034	43.59	0	0
ZNF76	ENSG00000065029	protein_coding	-1.17783	4.651	51.77	0	0
SLC9A3R2	ENSG00000065054	protein_coding	0.782971	2.194	35.4	0	0
NTHL1	ENSG00000065057	protein_coding	-0.860764	1.067	38.56	0	0
UHRF1BP1	ENSG00000065060	protein_coding	-1.12356	9.57	57.35	0	0
GNAI3	ENSG00000065135	protein_coding	0.421903	27.174	60.05	0	0
IPO5	ENSG00000065150	protein_coding	-0.915041	6.003	59.73	0	0
OAT	ENSG00000065154	protein_coding	0.854224	2.048	57.51	0	0
WDR3	ENSG00000065183	protein_coding	-0.849648	9.974	63.05	0	0
PKN2	ENSG00000065243	protein_coding	-0.788671	6.121	63.75	0	0
WDR18	ENSG00000065268	protein_coding	1.5652	1.608	37.71	0	0
TRAM2	ENSG00000065308	protein_coding	0.481623	6.908	53.4	0	0
NTN1	ENSG00000065320	protein_coding	1.993	5.954	50.23	0	0
GLP2R	ENSG00000065325	protein_coding	#N/A	4.572	55.03	0	0
MCM10	ENSG00000065328	protein_coding	-0.768651	4.587	56.41	1	0
DGKA	ENSG00000065357	protein_coding	-0.0976108	5.436	51.29	0	0
ERBB3	ENSG00000065361	protein_coding	#N/A	5.919	50.08	0	0
ROPN1	ENSG00000065371	protein_coding	#N/A	2.056	57.75	0	0
ANKRD44	ENSG00000065413	protein_coding	-0.52402	3.686	59.76	0	0
KARS	ENSG00000065427	protein_coding	-0.85876	2.421	54.43	0	0
ADAT1	ENSG00000065457	protein_coding	-2.21009	2.768	55.35	0	0
PDIA5	ENSG00000065485	protein_coding	-1.41134	2.232	54.79	0	0
TBC1D22B	ENSG00000065491	protein_coding	-0.475128	3.462	56.66	0	0
NDUFB4	ENSG00000065518	protein_coding	0.957222	1.426	60.61	0	0
SPEN	ENSG00000065526	protein_coding	-2.84984	12.232	57.01	0	0
MYLK	ENSG00000065534	protein_coding	-2.00705	10.027	54.66	1	0
ZC3H15	ENSG00000065548	protein_coding	-1.26527	2.138	62.78	0	0
MAP2K4	ENSG00000065559	protein_coding	-0.73441	3.856	62.91	1	0
TMEM206	ENSG00000065600	protein_coding	-1.1527	2.475	55.43	0	0
SNAP91	ENSG00000065609	protein_coding	#N/A	4.521	63.38	0	0
SLK	ENSG00000065613	protein_coding	-0.725978	7.766	63.45	1	0
CYB5R4	ENSG00000065615	protein_coding	-0.545639	9.252	62.54	0	0
COL17A1	ENSG00000065618	protein_coding	#N/A	5.734	51.69	0	0
GSTO2	ENSG00000065621	protein_coding	#N/A	6.423	56.52	0	0
SEC61A2	ENSG00000065665	protein_coding	0.423366	2.462	56.86	0	0
PRKCQ	ENSG00000065675	protein_coding	0.350497	3.285	56.9	0	0
TLE2	ENSG00000065717	protein_coding	#N/A	2.705	45.33	0	0
ASB1	ENSG00000065802	protein_coding	-0.707298	6.994	52.69	0	0
FAM107B	ENSG00000065809	protein_coding	1.02528	3.785	56.81	0	0
ME1	ENSG00000065833	protein_coding	1.60629	3.371	63.09	0	0
TBC1D1	ENSG00000065882	protein_coding	-0.0755071	5.7	57.16	0	0
CDK13	ENSG00000065883	protein_coding	-1.92112	7.298	61.13	0	0
MTHFD2	ENSG00000065911	protein_coding	-0.88694	4.456	56.7	0	0
SLC9A7	ENSG00000065923	protein_coding	0.146334	10.024	58.93	0	0
FOXJ2	ENSG00000065970	protein_coding	0.623437	5.523	52.43	0	0
YBX1	ENSG00000065978	protein_coding	-0.727413	1.524	59.59	0	0
PDE4A	ENSG00000065989	protein_coding	-0.420332	4.781	45.48	0	0
PPP2R5A	ENSG00000066027	protein_coding	-1.89359	3.128	60.72	1	0
CTNNA2	ENSG00000066032	protein_coding	#N/A	4.349	61.35	0	0
ELAVL1	ENSG00000066044	protein_coding	1.30709	6.015	47.79	0	0
TIE1	ENSG00000066056	protein_coding	#N/A	3.882	45.41	0	0
DIP2B	ENSG00000066084	protein_coding	-0.653786	8.593	58.16	0	0
SMARCD1	ENSG00000066117	protein_coding	0.068729	3.658	51.32	0	0
KDM4A	ENSG00000066135	protein_coding	-0.693314	4.474	53.25	0	0
NFYC	ENSG00000066136	protein_coding	1.21689	2.363	57.35	0	0
ZMYND12	ENSG00000066185	protein_coding	#N/A	1.775	57.17	0	0
SLC9A3	ENSG00000066230	protein_coding	#N/A	2.584	38.66	0	0
NGEF	ENSG00000066248	protein_coding	1.2205	3.215	51.62	0	0
ASPM	ENSG00000066279	protein_coding	-2.63759	10.887	65.34	0	0
CD84	ENSG00000066294	protein_coding	#N/A	8.181	58.4	0	0
ELOVL1	ENSG00000066322	protein_coding	1.74608	1.625	41.26	0	0
SPI1	ENSG00000066336	protein_coding	#N/A	1.403	47.38	0	0
ZNRD1	ENSG00000066379	protein_coding	-0.0873197	3.672	58.61	0	0
MPPED2	ENSG00000066382	protein_coding	#N/A	5.591	59.99	0	0
CLDN18	ENSG00000066405	protein_coding	#N/A	3.52	57.06	0	0
ZBTB11	ENSG00000066422	protein_coding	-1.6299	6.02	59.55	0	0
ATXN3	ENSG00000066427	protein_coding	0.386701	26.812	57.22	0	0
GOLGA5	ENSG00000066455	protein_coding	-0.536259	2.969	60.39	0	0
FGFR2	ENSG00000066468	protein_coding	-1.36551	4.369	54.59	1	0
LRRC40	ENSG00000066557	protein_coding	-0.534367	2.884	64.86	0	0
ISOC1	ENSG00000066583	protein_coding	0.703138	1.94	61.07	0	0
EML1	ENSG00000066629	protein_coding	0.0032203	4.535	54.81	0	0
TRMT11	ENSG00000066651	protein_coding	-1.80288	2.093	63.98	0	0
THUMPD1	ENSG00000066654	protein_coding	-1.03605	4.122	59.81	1	0
MSANTD3	ENSG00000066697	protein_coding	#N/A	1.991	56.24	0	0
KIF26A	ENSG00000066735	protein_coding	-1.0126	6.714	36.23	0	0
ATG2B	ENSG00000066739	protein_coding	-0.751597	13.684	62.69	0	0
ARFGEF1	ENSG00000066777	protein_coding	-1.50669	7.225	61.64	0	0
ACSM2B	ENSG00000066813	protein_coding	#N/A	2.935	60.83	0	0
ZFAT	ENSG00000066827	protein_coding	-1.71874	5.472	55.21	0	0
MTFR1	ENSG00000066855	protein_coding	-1.32814	2.64	59.78	0	0
STAG3	ENSG00000066923	protein_coding	-0.731183	4.45	52.89	0	0
FECH	ENSG00000066926	protein_coding	0.573056	3.853	57.34	0	0
MYO9A	ENSG00000066933	protein_coding	-2.8108	12.411	62.07	0	0
DDX3Y	ENSG00000067048	protein_coding	0.201345	4.445	62.3	0	0
PFKP	ENSG00000067057	protein_coding	2.3316	2.769	48.55	0	0
IDI1	ENSG00000067064	protein_coding	0.330438	2.301	56.68	0	0
SP100	ENSG00000067066	protein_coding	#N/A	3.882	60.8	0	0
KLF6	ENSG00000067082	protein_coding	0.860348	4.656	51.92	0	0
PLPP1	ENSG00000067113	protein_coding	#N/A	1.597	60.38	0	0
NEO1	ENSG00000067141	protein_coding	0.156663	7.342	61.27	0	0
TRAM1	ENSG00000067167	protein_coding	-0.513866	3.394	61.73	0	0
PHKA1	ENSG00000067177	protein_coding	-0.653436	6.173	62.13	0	0
TNFRSF1A	ENSG00000067182	protein_coding	0.795461	2.223	45.92	0	0
CACNB1	ENSG00000067191	protein_coding	#N/A	5.308	45.61	0	0
EVI5	ENSG00000067208	protein_coding	-1.71985	7.436	61.81	0	0
STOML1	ENSG00000067221	protein_coding	0.277534	6.336	47.16	0	0
PKM	ENSG00000067225	protein_coding	-1.10401	3.016	51.62	0	0
DHX29	ENSG00000067248	protein_coding	-1.39606	4.557	62.92	0	0
DNTTIP2	ENSG00000067334	protein_coding	-2.0002	5.897	60.72	1	0
METTL22	ENSG00000067365	protein_coding	-2.76657	4.984	50.44	0	0
TP53BP1	ENSG00000067369	protein_coding	-0.714907	10.384	58.28	1	0
TRO	ENSG00000067445	protein_coding	-0.615465	4.647	48.59	0	0
RRP15	ENSG00000067533	protein_coding	-1.08406	7.771	62.36	0	0
RHOA	ENSG00000067560	protein_coding	-0.312104	2.031	53.43	0	0
DHX8	ENSG00000067596	protein_coding	-0.665115	6.215	53.64	1	0
PRKCZ	ENSG00000067606	protein_coding	-0.365898	2.326	43.56	0	0
ZFY	ENSG00000067646	protein_coding	0.0253111	5.239	62.73	0	0
IARS2	ENSG00000067704	protein_coding	-2.47688	3.56	60.79	1	0
SYT1	ENSG00000067715	protein_coding	0.192645	4.808	64.39	0	0
NAV3	ENSG00000067798	protein_coding	#N/A	9.821	64.11	0	0
IDH3G	ENSG00000067829	protein_coding	0.522625	1.712	41.23	0	0
ROGDI	ENSG00000067836	protein_coding	-0.169925	2.684	36.74	0	0
PDZD4	ENSG00000067840	protein_coding	-0.934112	3.763	43.65	0	0
ATP2B3	ENSG00000067842	protein_coding	#N/A	6.742	41.79	0	0
ROCK1	ENSG00000067900	protein_coding	-1.46413	9.484	63.08	0	0
CBFB	ENSG00000067955	protein_coding	0.660428	3.136	59.55	1	0
PDK3	ENSG00000067992	protein_coding	0.798591	1.921	59.05	0	0
HYAL2	ENSG00000068001	protein_coding	-2.21937	4.054	38.95	0	0
HDAC4	ENSG00000068024	protein_coding	0.0572573	8.99	48.67	0	0
RASSF1	ENSG00000068028	protein_coding	-0.499233	2.06	45.43	0	0
FGFR3	ENSG00000068078	protein_coding	-2.02198	4.438	34.18	0	0
IFI35	ENSG00000068079	protein_coding	#N/A	1.241	49.03	0	0
HEATR6	ENSG00000068097	protein_coding	-0.457896	3.932	59.6	0	0
COASY	ENSG00000068120	protein_coding	-0.39526	2.458	42.44	0	0
PLEKHH3	ENSG00000068137	protein_coding	-0.740913	4.339	38	0	0
MEF2A	ENSG00000068305	protein_coding	-0.524842	5.824	63.14	0	0
OTUD5	ENSG00000068308	protein_coding	0.568745	2.74	50.07	0	0
TFE3	ENSG00000068323	protein_coding	0.415037	3.415	47.42	0	0
TBC1D25	ENSG00000068354	protein_coding	-0.418313	4.042	51.83	0	0
ACSL4	ENSG00000068366	protein_coding	0.56246	5.333	60.84	0	0
INPP5A	ENSG00000068383	protein_coding	-1.60507	2.967	45.87	0	0
GPKOW	ENSG00000068394	protein_coding	-0.23418	1.742	49.13	0	0
GRIPAP1	ENSG00000068400	protein_coding	-0.649738	3.278	49.78	0	0
FTSJ1	ENSG00000068438	protein_coding	0.0513635	1.986	49.4	0	0
PRR11	ENSG00000068489	protein_coding	1.25268	2.334	55.53	0	0
REEP1	ENSG00000068615	protein_coding	0.584963	3.857	53.95	0	0
ATP11A	ENSG00000068650	protein_coding	-0.856473	8.858	49.67	0	0
POLR1A	ENSG00000068654	protein_coding	-1.00677	12.749	53.31	0	0
LAPTM4A	ENSG00000068697	protein_coding	1.48552	1.765	58.39	0	0
TTC7A	ENSG00000068724	protein_coding	-1.54579	5.157	49.12	0	0
IP6K2	ENSG00000068745	protein_coding	-0.953626	2.49	52.39	0	0
STON1-GTF2A1L	ENSG00000068781	protein_coding	1.32599	3.824	59.02	0	0
SRBD1	ENSG00000068784	protein_coding	-1.55946	3.681	63.45	1	0
KIF2A	ENSG00000068796	protein_coding	-0.562672	3.36	61.14	1	0
RASGRP2	ENSG00000068831	protein_coding	#N/A	2.983	44.37	0	0
PSME4	ENSG00000068878	protein_coding	-1.53712	7.099	62.02	0	0
IFT80	ENSG00000068885	protein_coding	-2.39906	4.306	63.48	0	0
SIRT2	ENSG00000068903	protein_coding	0.65268	4.734	46.45	0	0
ERLEC1	ENSG00000068912	protein_coding	-0.989583	2.433	61.9	1	0
PPP2R5B	ENSG00000068971	protein_coding	-2.02915	2.745	45.58	0	0
PYGM	ENSG00000068976	protein_coding	#N/A	3.198	43.01	0	0
PAGE1	ENSG00000068985	protein_coding	#N/A	0.665	59.56	0	0
PITX1	ENSG00000069011	protein_coding	0.536328	2.406	40.6	0	0
TRPC7	ENSG00000069018	protein_coding	#N/A	2.987	57.49	0	0
MAST4	ENSG00000069020	protein_coding	-0.646163	10.711	60.8	0	0
ADGRF5	ENSG00000069122	protein_coding	#N/A	5.81	58.35	0	0
SDK2	ENSG00000069188	protein_coding	0.444258	10.723	47.7	0	0
ADAM7	ENSG00000069206	protein_coding	#N/A	3.367	63.24	0	0
NUP133	ENSG00000069248	protein_coding	-1.32729	5.207	59.75	0	0
NUCKS1	ENSG00000069275	protein_coding	-1.53448	6.496	60.43	1	0
VPS35	ENSG00000069329	protein_coding	-0.276301	6.79	61.14	0	0
DNAJA2	ENSG00000069345	protein_coding	-0.225931	3.122	57.28	0	0
BCL3	ENSG00000069399	protein_coding	#N/A	2.038	41.27	0	0
KCNAB2	ENSG00000069424	protein_coding	#N/A	4.273	43.95	0	0
ABCC9	ENSG00000069431	protein_coding	#N/A	8.293	63.88	0	0
GAL	ENSG00000069482	protein_coding	-5.63097	0.818	42.86	0	0
CLEC2D	ENSG00000069493	protein_coding	#N/A	5.279	62.62	0	0
FUNDC1	ENSG00000069509	protein_coding	0.720526	1.196	58.82	0	0
MAOB	ENSG00000069535	protein_coding	#N/A	2.566	60.69	0	0
RORA	ENSG00000069667	protein_coding	-0.791413	10.844	58.36	0	0
DRD4	ENSG00000069696	protein_coding	#N/A	1.375	32.98	0	0
TGFBR3	ENSG00000069702	protein_coding	-0.941897	6.465	57.71	0	0
KIAA1107	ENSG00000069712	protein_coding	0.195446	4.065	65.3	0	0
PLA2G10	ENSG00000069764	protein_coding	#N/A	1	52.09	0	0
HES2	ENSG00000069812	protein_coding	#N/A	4.262	42.49	0	0
ATP1B3	ENSG00000069849	protein_coding	0.928797	1.951	59.39	0	0
NEDD4	ENSG00000069869	protein_coding	0.150651	7.235	61.49	0	0
PIGB	ENSG00000069943	protein_coding	-0.492598	2.172	60.01	0	0
MAPK6	ENSG00000069956	protein_coding	-1.56374	5.345	56.86	1	0
GNB5	ENSG00000069966	protein_coding	0.667425	8.906	54.61	0	0
RAB27A	ENSG00000069974	protein_coding	0.834414	3.459	58.4	0	0
CECR5	ENSG00000069998	protein_coding	-0.636899	3.614	49.88	0	0
UFD1L	ENSG00000070010	protein_coding	0.996582	5.038	53.06	0	1
LRP6	ENSG00000070018	protein_coding	-1.70276	10.02	61.47	0	0
GUCY2C	ENSG00000070019	protein_coding	#N/A	3.844	60.43	0	0
SCT	ENSG00000070031	protein_coding	#N/A	0.366	26.65	0	0
PHRF1	ENSG00000070047	protein_coding	-1.03342	5.523	43.69	0	0
IKBKAP	ENSG00000070061	protein_coding	-1.32294	5.905	60.09	1	0
NUCB2	ENSG00000070081	protein_coding	-0.339228	3.256	58.56	0	0
PFN2	ENSG00000070087	protein_coding	0.819763	2.261	60.41	0	0
PTPN3	ENSG00000070159	protein_coding	-0.502891	8.765	54.66	0	0
SPTB	ENSG00000070182	protein_coding	-1.26039	10.153	51.79	0	0
DAPP1	ENSG00000070190	protein_coding	#N/A	2.955	61.29	0	0
FGF10	ENSG00000070193	protein_coding	#N/A	2.193	64.33	0	0
SLC44A1	ENSG00000070214	protein_coding	-0.601806	10.511	61.14	0	0
TMEM260	ENSG00000070269	protein_coding	-0.89503	4.264	60.87	0	0
SMG6	ENSG00000070366	protein_coding	-0.601142	5.96	54.25	0	0
EXOC5	ENSG00000070367	protein_coding	-1.23458	10.589	64.03	1	0
CLTCL1	ENSG00000070371	protein_coding	-1.63062	5.513	53.59	0	0
FGF22	ENSG00000070388	protein_coding	#N/A	1.712	32.07	0	0
FSTL3	ENSG00000070404	protein_coding	#N/A	2.542	35.01	0	0
DGCR2	ENSG00000070413	protein_coding	-0.804537	4.814	51.38	0	0
RNF126	ENSG00000070423	protein_coding	0.259977	2.092	36.45	0	0
MNT	ENSG00000070444	protein_coding	1.22471	4.996	38.33	0	0
ZXDC	ENSG00000070476	protein_coding	-0.88733	4.639	51.32	0	0
JMJD6	ENSG00000070495	protein_coding	0.452786	5.517	51.17	0	0
POLB	ENSG00000070501	protein_coding	-0.733315	1.341	59.56	0	0
ST6GALNAC1	ENSG00000070526	protein_coding	#N/A	2.657	51.38	0	0
WIPI1	ENSG00000070540	protein_coding	0.341037	1.886	53.42	0	0
FRMPD1	ENSG00000070601	protein_coding	#N/A	5.465	55.85	0	0
GBA2	ENSG00000070610	protein_coding	-2.6679	3.757	49.3	0	0
NDST1	ENSG00000070614	protein_coding	-1.77052	8.03	47.96	0	0
ASNS	ENSG00000070669	protein_coding	-0.118345	2.356	61.58	0	0
AP3M2	ENSG00000070718	protein_coding	-0.488474	3.669	58.6	0	0
CNGB1	ENSG00000070729	protein_coding	#N/A	5.641	49.73	0	0
ST6GALNAC2	ENSG00000070731	protein_coding	#N/A	2.17	45.9	0	0
CHAT	ENSG00000070748	protein_coding	#N/A	2.528	48.96	0	0
PABPC1	ENSG00000070756	protein_coding	-0.823916	3.485	59.25	0	0
TESK2	ENSG00000070759	protein_coding	-0.68226	3.074	57.77	0	0
CFAP20	ENSG00000070761	protein_coding	#N/A	1.605	55.07	0	0
CSNK2A2	ENSG00000070770	protein_coding	#NUM!	4.978	58.69	0	0
PTPN21	ENSG00000070778	protein_coding	-2.04122	6.166	58.72	0	0
EIF2B3	ENSG00000070785	protein_coding	-0.194433	1.923	57.45	0	0
CAMK2A	ENSG00000070808	protein_coding	#N/A	5.322	47.89	0	0
TCOF1	ENSG00000070814	protein_coding	-0.519534	5.24	47.55	1	0
CDC42	ENSG00000070831	protein_coding	0.922142	2.274	58.18	0	0
OSBPL3	ENSG00000070882	protein_coding	-0.768095	6.76	59.28	0	0
EPHA8	ENSG00000070886	protein_coding	-0.494765	4.943	43.21	0	0
SLC12A3	ENSG00000070915	protein_coding	#N/A	5.567	47.17	0	0
RAD18	ENSG00000070950	protein_coding	-0.103657	5.886	59.56	0	0
ATP2B1	ENSG00000070961	protein_coding	-0.463676	7.032	63.63	0	0
TRPM5	ENSG00000070985	protein_coding	#N/A	3.929	36.3	0	0
NCK2	ENSG00000071051	protein_coding	-0.695689	2.683	55.46	0	0
MAP4K4	ENSG00000071054	protein_coding	-1.38666	7.64	58.96	0	0
MGAT4A	ENSG00000071073	protein_coding	-0.796205	8.432	59.99	0	0
RPL31	ENSG00000071082	protein_coding	-0.66259	2.328	57.16	0	0
WDR1	ENSG00000071127	protein_coding	0.475239	4.482	45.02	0	0
SNX13	ENSG00000071189	protein_coding	-2.8402	6.817	64.91	0	0
MS4A12	ENSG00000071203	protein_coding	#N/A	1.167	60.68	0	0
ARHGAP10	ENSG00000071205	protein_coding	-1.03068	8.188	59.06	0	0
RPS6KA2	ENSG00000071242	protein_coding	-2.7425	5.992	53.52	0	0
ING3	ENSG00000071243	protein_coding	-0.0980691	3.777	64.45	0	0
VASH1	ENSG00000071246	protein_coding	-2.96467	5.728	45.17	0	0
LMCD1	ENSG00000071282	protein_coding	#N/A	8.405	56.12	0	0
WBSCR22	ENSG00000071462	protein_coding	0.252429	3.886	45.93	0	0
SEL1L	ENSG00000071537	protein_coding	-0.566385	7.925	61.52	0	0
TRIP13	ENSG00000071539	protein_coding	1.00428	2.672	49.51	0	0
ATP6AP1	ENSG00000071553	protein_coding	1.1882	4.515	43.22	0	0
TCF3	ENSG00000071564	protein_coding	-0.413076	4.451	40.43	0	0
TRIB2	ENSG00000071575	protein_coding	#N/A	4.391	52.32	1	0
DAZAP1	ENSG00000071626	protein_coding	0.106572	3.943	41.25	0	0
MBD3	ENSG00000071655	protein_coding	-0.337922	5.518	41.96	0	0
PRLH	ENSG00000071677	protein_coding	#N/A	0.264	34.72	0	0
HLTF	ENSG00000071794	protein_coding	-0.0576728	5.317	64.05	1	0
FAM50A	ENSG00000071859	protein_coding	0.0570632	1.47	39.52	0	0
FAM3A	ENSG00000071889	protein_coding	-1.3545	3.995	44.68	0	0
CPSF1	ENSG00000071894	protein_coding	-0.520166	4.494	40.02	0	0
MYO3B	ENSG00000071909	protein_coding	#N/A	5.529	59.79	0	0
CYBRD1	ENSG00000071967	protein_coding	0.612184	4.365	58.72	0	0
CDH19	ENSG00000071991	protein_coding	#N/A	6.341	67.7	0	0
PDCD2	ENSG00000071994	protein_coding	-0.723406	3.378	58.36	0	0
SLC6A15	ENSG00000072041	protein_coding	-0.556171	4.879	65.46	0	0
RDH11	ENSG00000072042	protein_coding	0.306302	4.035	57.34	1	0
PRKACA	ENSG00000072062	protein_coding	1.9542	3.105	46.65	0	0
ADGRL1	ENSG00000072071	protein_coding	#N/A	7.853	43.58	0	0
SPP2	ENSG00000072080	protein_coding	#N/A	1.024	58.29	0	0
ACTN1	ENSG00000072110	protein_coding	0.856956	4.674	49.19	0	0
ZFYVE26	ENSG00000072121	protein_coding	-2.60174	9.675	57	0	0
RPS6KA6	ENSG00000072133	protein_coding	-3.65412	8.169	64.83	0	0
EPN2	ENSG00000072134	protein_coding	-0.809316	4.871	51.28	0	0
PTPN18	ENSG00000072135	protein_coding	-0.702614	3.669	52.35	0	0
LIMS2	ENSG00000072163	protein_coding	#N/A	4.807	43.64	0	0
ASIC4	ENSG00000072182	protein_coding	#N/A	3.34	43.04	0	0
SPEG	ENSG00000072195	protein_coding	-0.446402	10.782	42.32	0	0
LNX1	ENSG00000072201	protein_coding	#N/A	3.757	58.58	0	0
ALDH3A2	ENSG00000072210	protein_coding	-0.727264	3.928	55.78	1	0
TFRC	ENSG00000072274	protein_coding	-1.12638	5.111	57.53	1	0
SREBF1	ENSG00000072310	protein_coding	-0.825267	4.653	41.96	0	0
TRPC5	ENSG00000072315	protein_coding	#N/A	5.839	59.76	0	0
AFF4	ENSG00000072364	protein_coding	0.000444248	9.552	59.58	0	0
UBE2D1	ENSG00000072401	protein_coding	1.43597	2.659	63.95	0	0
MPP5	ENSG00000072415	protein_coding	-1.16523	5.552	62.37	1	0
RHOBTB1	ENSG00000072422	protein_coding	-0.540996	4.473	61.06	1	0
SMC1A	ENSG00000072501	protein_coding	-0.0718952	9.93	54.46	1	0
HSD17B10	ENSG00000072506	protein_coding	0.206369	0.96	47.98	0	0
MARK2	ENSG00000072518	protein_coding	-0.852412	4.728	50.35	0	0
HMMR	ENSG00000072571	protein_coding	-0.278687	3.102	63.03	0	0
CHFR	ENSG00000072609	protein_coding	-0.400213	11.133	51.31	0	0
TRHDE	ENSG00000072657	protein_coding	#N/A	10.733	63.86	0	0
P4HA2	ENSG00000072682	protein_coding	1.13678	3.349	50.61	1	0
FCGR2B	ENSG00000072694	protein_coding	#N/A	4.68	52.76	0	0
NFATC3	ENSG00000072736	protein_coding	-1.53561	6.328	58.47	0	0
TRNT1	ENSG00000072756	protein_coding	-1.22136	2.276	61.11	0	0
ACADVL	ENSG00000072778	protein_coding	-0.289161	2.352	41.5	0	0
STK10	ENSG00000072786	protein_coding	-1.01244	6.06	50.97	0	0
FBXW11	ENSG00000072803	protein_coding	-0.624676	4.539	60.28	1	0
ACAP1	ENSG00000072818	protein_coding	#N/A	4.898	45.44	0	0
CRMP1	ENSG00000072832	protein_coding	#N/A	3.146	51.02	0	0
EVC	ENSG00000072840	protein_coding	-3.259	6.431	52.6	0	0
DERL2	ENSG00000072849	protein_coding	0.778973	4.209	58.62	0	0
SIDT1	ENSG00000072858	protein_coding	#N/A	5.08	59.21	0	0
NDE1	ENSG00000072864	protein_coding	-0.826707	3.936	51.46	0	0
MRVI1	ENSG00000072952	protein_coding	#N/A	6.155	54.35	0	0
TMEM38A	ENSG00000072954	protein_coding	0.869416	2.649	50.07	0	0
AP1M1	ENSG00000072958	protein_coding	1.63296	13.193	48.41	0	0
PVR	ENSG00000073008	protein_coding	0.209308	3.325	49.64	0	0
XRCC1	ENSG00000073050	protein_coding	1.00718	2.802	49.06	0	0
SCARB1	ENSG00000073060	protein_coding	1.31702	5.527	48.55	0	0
CYP2W1	ENSG00000073067	protein_coding	#N/A	2.361	33.19	0	0
MCM2	ENSG00000073111	protein_coding	-0.130966	3.622	49.27	1	0
MOV10L1	ENSG00000073146	protein_coding	#N/A	3.96	52.36	0	0
PANX2	ENSG00000073150	protein_coding	#N/A	3.051	35.82	0	0
SELENOO	ENSG00000073169	protein_coding	-0.586121	2.315	44.22	0	0
TP63	ENSG00000073282	protein_coding	-2.57779	4.909	62.87	0	0
ALPK1	ENSG00000073331	protein_coding	-0.247218	5.633	59.55	0	0
LLGL2	ENSG00000073350	protein_coding	-3.48113	3.527	43.94	0	0
PDE8A	ENSG00000073417	protein_coding	-2.80735	4.664	58.2	0	0
CLCN4	ENSG00000073464	protein_coding	#N/A	6.75	54.76	0	0
NLE1	ENSG00000073536	protein_coding	0.172269	5.286	47.87	0	0
SDHA	ENSG00000073578	protein_coding	0.0954474	3.001	53.93	0	0
SMARCE1	ENSG00000073584	protein_coding	-0.380386	5.84	62.28	0	0
FNDC8	ENSG00000073598	protein_coding	#N/A	1.388	51.65	0	0
GSDMB	ENSG00000073605	protein_coding	#N/A	4.655	51.15	0	0
KDM5A	ENSG00000073614	protein_coding	-1.57719	10.763	60.54	1	0
ADAM11	ENSG00000073670	protein_coding	-0.479993	4.571	40.72	0	0
PPP2R3A	ENSG00000073711	protein_coding	-0.78795	6.795	60.93	0	0
FERMT2	ENSG00000073712	protein_coding	0.432307	6.001	60.7	0	0
ABCB11	ENSG00000073734	protein_coding	#N/A	4.775	63.07	0	0
DHRS9	ENSG00000073737	protein_coding	#N/A	2.863	60.37	0	0
CD5L	ENSG00000073754	protein_coding	#N/A	2.191	60.31	0	0
PTGS2	ENSG00000073756	protein_coding	-1.65896	4.514	65.14	0	0
IGF2BP2	ENSG00000073792	protein_coding	0.849448	3.688	57.46	0	0
MAP3K13	ENSG00000073803	protein_coding	#N/A	9.876	59.93	0	0
ST6GAL1	ENSG00000073849	protein_coding	-0.230613	4.893	55.62	0	0
TBX21	ENSG00000073861	protein_coding	#N/A	2.572	46.78	0	0
FRY	ENSG00000073910	protein_coding	-1.60245	13.2	61.13	0	0
PICALM	ENSG00000073921	protein_coding	-0.179788	3.613	62.67	0	0
NSF	ENSG00000073969	protein_coding	-0.398383	3.983	61.38	0	0
GLI2	ENSG00000074047	protein_coding	0.710493	6.799	47.58	0	0
CLASP1	ENSG00000074054	protein_coding	-1.20124	8.092	58.95	0	0
MRPS34	ENSG00000074071	protein_coding	0.233167	1.04	34.6	0	0
NOTCH3	ENSG00000074181	protein_coding	0.806275	8.666	45.12	0	0
CLNS1A	ENSG00000074201	protein_coding	-0.119385	2.993	58.24	1	0
PPP2R2C	ENSG00000074211	protein_coding	#N/A	4.538	48.52	1	0
TEAD2	ENSG00000074219	protein_coding	-1.72085	2.44	46.43	0	0
EED	ENSG00000074266	protein_coding	-0.771597	2.767	62.9	0	0
CDHR2	ENSG00000074276	protein_coding	#N/A	4.509	46.22	0	0
SNCB	ENSG00000074317	protein_coding	#N/A	1.407	43.05	0	0
TSG101	ENSG00000074319	protein_coding	1.27202	2.101	60.3	0	0
NCBP3	ENSG00000074356	protein_coding	#N/A	12.77	55.43	0	0
ATP2A3	ENSG00000074370	protein_coding	#N/A	4.826	43.1	0	0
CA12	ENSG00000074410	protein_coding	#N/A	6.413	51.55	0	0
MGLL	ENSG00000074416	protein_coding	#N/A	4.941	50.68	0	0
NTN4	ENSG00000074527	protein_coding	#N/A	3.615	59.9	1	0
BCS1L	ENSG00000074582	protein_coding	-0.533169	2.015	45.58	0	0
NUAK1	ENSG00000074590	protein_coding	-0.619857	6.828	54.03	1	0
DPP8	ENSG00000074603	protein_coding	-1.05817	8.699	59.03	0	0
SLC24A1	ENSG00000074621	protein_coding	-3.0915	5.768	55.27	0	0
ZNF532	ENSG00000074657	protein_coding	-8.12153	6.696	56.66	0	0
SCARF1	ENSG00000074660	protein_coding	#N/A	3.443	41.93	0	0
LMAN1	ENSG00000074695	protein_coding	-0.2988	5.521	62.67	1	0
HACD3	ENSG00000074696	protein_coding	#N/A	3.228	57.45	0	0
IPCEF1	ENSG00000074706	protein_coding	0.04828	6.689	59.86	0	0
ZZEF1	ENSG00000074755	protein_coding	-1.3248	11.456	55.51	0	0
NOX3	ENSG00000074771	protein_coding	#N/A	2.042	59.21	0	0
ENO1	ENSG00000074800	protein_coding	0.492922	2.266	49.77	0	0
SLC12A1	ENSG00000074803	protein_coding	#N/A	8.632	61.89	0	0
MYDGF	ENSG00000074842	protein_coding	#N/A	1.018	45.26	0	0
ANO8	ENSG00000074855	protein_coding	-0.365649	4.618	37.33	0	0
TUBE1	ENSG00000074935	protein_coding	-1.2083	3.61	65.36	0	0
ARHGEF10L	ENSG00000074964	protein_coding	-0.459432	4.585	45.64	0	0
TXK	ENSG00000074966	protein_coding	#N/A	2.914	60.54	0	0
WSCD2	ENSG00000075035	protein_coding	#N/A	4.71	53.01	0	0
KCNQ2	ENSG00000075043	protein_coding	-2.92832	9.213	37.7	0	0
TACR2	ENSG00000075073	protein_coding	#N/A	2.083	48.01	0	0
ACTR6	ENSG00000075089	protein_coding	0.21654	2.464	59	0	0
TIPIN	ENSG00000075131	protein_coding	-0.304639	1.744	55.95	1	0
SRI	ENSG00000075142	protein_coding	-0.0182314	2.01	60.47	0	0
EIF4G3	ENSG00000075151	protein_coding	-0.447816	6.196	60.64	0	0
NUP37	ENSG00000075188	protein_coding	0.513852	2.372	63.48	0	0
SEMA3A	ENSG00000075213	protein_coding	0.963474	8.225	65.65	0	0
GTSE1	ENSG00000075218	protein_coding	0.804001	3.112	49.87	0	0
SEMA3C	ENSG00000075223	protein_coding	-1.72727	5.174	64.18	0	0
TTC38	ENSG00000075234	protein_coding	-0.538654	2.61	45.84	0	0
ACAT1	ENSG00000075239	protein_coding	0.077317	2.258	57.51	0	0
GRAMD4	ENSG00000075240	protein_coding	-0.879146	4.484	42.32	0	0
CELSR1	ENSG00000075275	protein_coding	-1.34903	11.389	46.07	0	0
WNT8B	ENSG00000075290	protein_coding	#N/A	2.112	57.26	0	0
ZNF638	ENSG00000075292	protein_coding	-2.29322	6.821	61.84	0	0
SLC25A40	ENSG00000075303	protein_coding	-1.21826	4.045	64.53	0	0
TIMM21	ENSG00000075336	protein_coding	0.621488	3.095	57.69	1	0
ADD2	ENSG00000075340	protein_coding	-0.382877	9.267	55.19	0	0
FGF4	ENSG00000075388	protein_coding	#N/A	3.233	44.51	0	0
RASAL2	ENSG00000075391	protein_coding	-1.61298	14.453	63.01	0	0
VPS9D1	ENSG00000075399	protein_coding	#N/A	2.791	40.46	0	0
ZNF37A	ENSG00000075407	protein_coding	-1.63414	8.738	60.89	0	0
MARK3	ENSG00000075413	protein_coding	-1.26751	3.584	57.85	0	0
SLC25A3	ENSG00000075415	protein_coding	-0.165953	6.087	57.61	0	0
FNDC3B	ENSG00000075420	protein_coding	0.115228	7.904	60.24	0	0
FOSL2	ENSG00000075426	protein_coding	#N/A	6.708	48.2	0	0
CACNG5	ENSG00000075429	protein_coding	#N/A	1.311	52.83	0	0
CACNG4	ENSG00000075461	protein_coding	#N/A	3.38	47.63	0	0
FRYL	ENSG00000075539	protein_coding	-1.39444	11.706	63.06	0	0
TMEM131	ENSG00000075568	protein_coding	-1.32161	7.476	60.71	0	0
FSCN1	ENSG00000075618	protein_coding	3.18423	2.777	40.38	0	0
ACTB	ENSG00000075624	protein_coding	1.57736	2.245	43.3	0	0
MOCOS	ENSG00000075643	protein_coding	-1.81558	6.16	57.24	0	0
PLD1	ENSG00000075651	protein_coding	0.940946	5.855	61.14	0	0
ATP12A	ENSG00000075673	protein_coding	#N/A	4.258	50.74	0	0
WDR62	ENSG00000075702	protein_coding	-0.262559	5.971	48.55	0	0
DLG1	ENSG00000075711	protein_coding	-1.12023	5.034	63.41	0	0
RAB7A	ENSG00000075785	protein_coding	2.42089	2.244	55.94	1	0
BCAP29	ENSG00000075790	protein_coding	-0.0786325	5.773	62.58	0	0
SEC31B	ENSG00000075826	protein_coding	-6.20163	5.087	53.72	0	0
SART3	ENSG00000075856	protein_coding	-0.783674	4.004	57.35	1	0
ARHGAP15	ENSG00000075884	protein_coding	#N/A	2.968	63.52	0	0
TUBA3D	ENSG00000075886	protein_coding	#N/A	1.546	47.91	0	0
PAX2	ENSG00000075891	protein_coding	#N/A	4.14	48.77	0	0
EXOSC7	ENSG00000075914	protein_coding	-1.29496	1.647	53.13	0	0
KIFAP3	ENSG00000075945	protein_coding	0.0326589	4.111	65.73	0	0
MKRN2	ENSG00000075975	protein_coding	-0.393061	2.848	54.82	0	0
MCM6	ENSG00000076003	protein_coding	-0.263374	3.736	59.72	1	0
REXO2	ENSG00000076043	protein_coding	0.11063	1.161	60.39	0	0
RBM7	ENSG00000076053	protein_coding	0.400879	6.725	61.73	0	0
RBMS2	ENSG00000076067	protein_coding	0.701238	8.382	55.98	0	0
BAZ2A	ENSG00000076108	protein_coding	0.00692891	8.831	51.36	0	0
PTPN23	ENSG00000076201	protein_coding	-0.0371391	5.244	48.47	0	0
MLH1	ENSG00000076242	protein_coding	#N/A	2.752	58.11	0	0
UNG	ENSG00000076248	protein_coding	0.318051	2.234	52.68	1	0
FMO4	ENSG00000076258	protein_coding	-0.649093	2.252	59.87	0	0
KLHL20	ENSG00000076321	protein_coding	-1.19971	3.421	61.67	0	0
RGS11	ENSG00000076344	protein_coding	#N/A	4.294	35.44	0	0
SLC46A1	ENSG00000076351	protein_coding	1.02584	6.376	47.36	0	0
PLXNA2	ENSG00000076356	protein_coding	-0.830075	11.444	52.02	0	0
SPAG5	ENSG00000076382	protein_coding	-0.975057	4.04	53.5	1	0
ANKRD13A	ENSG00000076513	protein_coding	-0.48765	4.148	56	0	0
TPD52	ENSG00000076554	protein_coding	1.18688	4.339	58.85	0	0
ACACB	ENSG00000076555	protein_coding	-2.84029	9.36	53.22	0	0
TRAF4	ENSG00000076604	protein_coding	-0.320007	2.923	40.36	0	0
PAG1	ENSG00000076641	protein_coding	-0.74742	10.744	59.44	0	0
GPATCH1	ENSG00000076650	protein_coding	0.191852	3.492	54.29	0	0
ICAM3	ENSG00000076662	protein_coding	#N/A	2.491	43.85	0	0
NT5C2	ENSG00000076685	protein_coding	0.47703	3.435	59.91	0	0
MCAM	ENSG00000076706	protein_coding	-0.0790716	4.865	40.41	1	0
GPC4	ENSG00000076716	protein_coding	1.77594	4.96	58.75	0	0
MBNL3	ENSG00000076770	protein_coding	0.626542	11.294	63.04	0	0
CAMSAP3	ENSG00000076826	protein_coding	1.03052	4.179	41.34	0	0
RAP1GAP	ENSG00000076864	protein_coding	1.25846	4.294	43.37	0	0
XAB2	ENSG00000076924	protein_coding	1.37598	4.555	39.18	0	0
ARHGEF1	ENSG00000076928	protein_coding	0.770599	3.439	41.75	0	0
STXBP2	ENSG00000076944	protein_coding	1.08831	1.974	38.83	0	0
MAP2K7	ENSG00000076984	protein_coding	1.22191	3.43	36.86	0	0
NMRK2	ENSG00000077009	protein_coding	#N/A	1.139	42.21	0	0
DGKD	ENSG00000077044	protein_coding	-1.63202	6.297	52.24	0	0
CTTNBP2	ENSG00000077063	protein_coding	-0.143432	5.97	61.23	0	0
ACTL6B	ENSG00000077080	protein_coding	#N/A	1.537	46.92	0	0
RARB	ENSG00000077092	protein_coding	-0.744383	3.084	59.86	0	0
TOP2B	ENSG00000077097	protein_coding	-1.87216	5.389	64.85	1	0
TM9SF3	ENSG00000077147	protein_coding	-0.473511	6.141	62.97	1	0
NFKB2	ENSG00000077150	protein_coding	1.08989	3.416	38.63	0	0
UBE2T	ENSG00000077152	protein_coding	0.294725	0.922	59.29	1	0
PPP1R12B	ENSG00000077157	protein_coding	-3.19172	15.431	60.37	0	1
DNAJC10	ENSG00000077232	protein_coding	-2.51924	20.129	63.61	0	0
GTF3C1	ENSG00000077235	protein_coding	-0.839302	7.018	50.58	1	0
IL4R	ENSG00000077238	protein_coding	-1.16046	3.685	50.08	0	0
USP33	ENSG00000077254	protein_coding	-0.772909	4.502	61.65	0	0
PAK3	ENSG00000077264	protein_coding	#N/A	8.94	60.78	0	0
CAPN6	ENSG00000077274	protein_coding	#N/A	3.568	58.64	0	0
DCX	ENSG00000077279	protein_coding	#N/A	9.405	60.52	0	0
SNRPA	ENSG00000077312	protein_coding	0.970944	1.621	49.23	0	1
SPAG6	ENSG00000077327	protein_coding	#N/A	2.77	61.61	0	0
EXOSC5	ENSG00000077348	protein_coding	0.755763	1.118	47.47	0	0
DYNC1I2	ENSG00000077380	protein_coding	-0.00860502	2.604	63.51	1	0
APBB1IP	ENSG00000077420	protein_coding	#N/A	2.771	58.45	0	0
LRCH4	ENSG00000077454	protein_coding	0.419775	4.754	39.64	0	0
FAM76B	ENSG00000077458	protein_coding	-1.47738	3.952	65.4	0	0
SIRT6	ENSG00000077463	protein_coding	0.693447	1.641	42.09	0	0
TYR	ENSG00000077498	protein_coding	#N/A	2.485	64.71	0	0
POLD3	ENSG00000077514	protein_coding	-1.22672	3.821	58.28	1	0
ACTN2	ENSG00000077522	protein_coding	-1.23412	5.103	56.94	0	0
CAPZB	ENSG00000077549	protein_coding	1.50748	2.068	50.79	0	0
GPR137B	ENSG00000077585	protein_coding	-0.724635	2.042	56.37	0	0
NAALAD2	ENSG00000077616	protein_coding	-0.79518	3.6	65.02	0	0
JADE1	ENSG00000077684	protein_coding	#N/A	5.772	55.79	1	0
SLC25A43	ENSG00000077713	protein_coding	-6.70044	2.783	54.66	0	0
UBE2A	ENSG00000077721	protein_coding	2.0374	2.643	59.86	0	0
FGFR1	ENSG00000077782	protein_coding	-0.699039	6.054	49.45	0	0
FKBP6	ENSG00000077800	protein_coding	#N/A	1.933	52.24	0	0
SMC1B	ENSG00000077935	protein_coding	#N/A	4.201	60.11	0	0
FBLN1	ENSG00000077942	protein_coding	1.52192	2.896	46.87	0	0
ITGA8	ENSG00000077943	protein_coding	0.726036	6.755	59.98	0	0
CST7	ENSG00000077984	protein_coding	#N/A	0.93	43.54	0	0
MAP2	ENSG00000078018	protein_coding	#N/A	9.711	64.1	0	0
PIAS2	ENSG00000078043	protein_coding	-0.703706	11.075	61.41	0	0
AMPH	ENSG00000078053	protein_coding	0.476753	3.418	60.85	0	0
ARAF	ENSG00000078061	protein_coding	-0.26638	2.504	48.77	0	0
MCCC1	ENSG00000078070	protein_coding	-0.0122436	2.874	58.38	0	0
LAMP3	ENSG00000078081	protein_coding	#N/A	3.375	55.83	0	0
FAP	ENSG00000078098	protein_coding	#N/A	2.78	63.3	0	0
NEBL	ENSG00000078114	protein_coding	-0.229201	9.216	60.96	0	0
ACER3	ENSG00000078124	protein_coding	0.0219148	7.378	61.26	0	0
UBE2K	ENSG00000078140	protein_coding	1.15116	5.245	57.98	0	0
PIK3C3	ENSG00000078142	protein_coding	0.18233	9.443	64.67	0	0
N4BP2	ENSG00000078177	protein_coding	-1.79435	9.747	59.48	0	0
TIGAR	ENSG00000078237	protein_coding	#N/A	3.633	58.07	0	0
TULP3	ENSG00000078246	protein_coding	0.117357	3.076	55	0	0
SYNJ2	ENSG00000078269	protein_coding	-0.43515	7.378	50.33	0	0
ADCY2	ENSG00000078295	protein_coding	#N/A	9.908	59.08	0	0
PPP2R5C	ENSG00000078304	protein_coding	-0.170522	4.481	55.37	0	0
RBFOX1	ENSG00000078328	protein_coding	#N/A	4.775	58.63	0	0
GNB1	ENSG00000078369	protein_coding	1.45984	3.145	53.3	0	0
HOXA9	ENSG00000078399	protein_coding	1.14162	2.06	44.77	0	0
EDN1	ENSG00000078401	protein_coding	#N/A	2.033	57.17	0	0
MLLT10	ENSG00000078403	protein_coding	-1.32988	5.126	60.23	0	0
ZCWPW1	ENSG00000078487	protein_coding	0.298081	2.356	55.18	0	0
ADCYAP1R1	ENSG00000078549	protein_coding	#N/A	6.575	48.11	0	0
FGF20	ENSG00000078579	protein_coding	#N/A	1.688	60.76	0	0
P2RY10	ENSG00000078589	protein_coding	#N/A	1.714	61.56	0	0
ITM2A	ENSG00000078596	protein_coding	#N/A	1.698	63.04	0	0
NRDC	ENSG00000078618	protein_coding	#N/A	3.895	60.65	0	0
VDAC3	ENSG00000078668	protein_coding	0.410712	1.355	59.58	0	0
PCM1	ENSG00000078674	protein_coding	-1.03583	8.287	63.46	0	0
TNRC6C	ENSG00000078687	protein_coding	-1.27555	9.74	57.78	0	0
CBFA2T2	ENSG00000078699	protein_coding	0.332753	7.803	57.64	0	0
BRINP1	ENSG00000078725	protein_coding	#N/A	3.202	59.24	0	0
ITCH.1	ENSG00000078747	protein_coding	-1.25092	6.401	59.47	0	0
PKD2L2	ENSG00000078795	protein_coding	#N/A	2.333	60.67	0	0
TP53INP2	ENSG00000078804	protein_coding	#N/A	4.184	44.82	0	0
SDF4	ENSG00000078808	protein_coding	0.507528	3.516	38.65	0	0
MYH7B	ENSG00000078814	protein_coding	#N/A	6.293	42.14	0	0
BPIFB2	ENSG00000078898	protein_coding	#N/A	1.898	45	0	0
TP73	ENSG00000078900	protein_coding	1.86532	5.188	40.48	0	0
TOLLIP	ENSG00000078902	protein_coding	0.993602	3.666	42.51	0	0
UBE2D4	ENSG00000078967	protein_coding	-0.263034	3.974	54.21	0	0
CLUL1	ENSG00000079101	protein_coding	#N/A	2.449	58.49	0	0
RUNX1T1	ENSG00000079102	protein_coding	#N/A	7.687	61.89	0	0
CDH17	ENSG00000079112	protein_coding	#N/A	3.693	59.39	0	0
THOC1	ENSG00000079134	protein_coding	-0.783114	2.791	62.69	0	0
FKBP7	ENSG00000079150	protein_coding	-1	2.834	62.42	0	0
OSBPL6	ENSG00000079156	protein_coding	-1.03887	10.513	60.66	0	0
SLC1A3	ENSG00000079215	protein_coding	-0.794314	4.17	59.64	0	0
XRCC5	ENSG00000079246	protein_coding	0.226163	3.761	60.54	1	0
LXN	ENSG00000079257	protein_coding	#N/A	1.116	63.04	0	0
SP140	ENSG00000079263	protein_coding	#N/A	3.246	58.71	0	0
MKNK1	ENSG00000079277	protein_coding	-0.0590355	3.408	51.76	0	0
TNS1	ENSG00000079308	protein_coding	#N/A	10.331	47.62	0	0
REXO1	ENSG00000079313	protein_coding	-1.43373	4.591	39.06	0	0
SAR1A	ENSG00000079332	protein_coding	0.671076	5.981	59.44	1	0
CDC14A	ENSG00000079335	protein_coding	1.16993	4.137	61.61	0	0
RAPGEF3	ENSG00000079337	protein_coding	#N/A	6.061	45.66	0	0
CEACAM1	ENSG00000079385	protein_coding	#N/A	3.519	52.48	0	0
SENP1	ENSG00000079387	protein_coding	-0.88829	4.967	61.38	0	0
DUSP13	ENSG00000079393	protein_coding	#N/A	1.778	45.15	0	0
CIC	ENSG00000079432	protein_coding	-1.12995	8.218	38.48	0	0
LIPE	ENSG00000079435	protein_coding	#N/A	3.813	45.04	0	0
FDFT1	ENSG00000079459	protein_coding	0.643762	2.66	55.64	0	0
PAFAH1B3	ENSG00000079462	protein_coding	0.650992	1.098	46.27	0	0
OPHN1	ENSG00000079482	protein_coding	-1.84951	7.879	60.25	0	0
AFM	ENSG00000079557	protein_coding	#N/A	2.059	63.78	0	0
KIF22	ENSG00000079616	protein_coding	-0.217311	2.505	49.81	0	0
SCGN	ENSG00000079689	protein_coding	#N/A	1.447	60.43	0	0
CARMIL1	ENSG00000079691	protein_coding	-0.21747	5.431	60.46	0	0
PGM1	ENSG00000079739	protein_coding	-0.395705	2.657	57.58	0	0
DDX1	ENSG00000079785	protein_coding	-0.475608	2.817	60.51	1	0
DNM2	ENSG00000079805	protein_coding	0.26896	5.651	46.93	0	0
EPB41L2	ENSG00000079819	protein_coding	-0.0494212	4.457	61.4	1	0
RIMS1	ENSG00000079841	protein_coding	#N/A	7.055	64.43	0	0
MOXD1	ENSG00000079931	protein_coding	-0.223543	3.059	62.92	0	0
STX7	ENSG00000079950	protein_coding	1.89308	15.791	62.59	0	0
RABL2B	ENSG00000079974	protein_coding	-0.195551	2.498	49.95	0	0
KEAP1	ENSG00000079999	protein_coding	-0.718729	2.955	45.99	0	0
DDX43	ENSG00000080007	protein_coding	#N/A	2.513	59.12	0	0
PTPRH	ENSG00000080031	protein_coding	#N/A	3.877	47.36	0	0
DCT	ENSG00000080166	protein_coding	#N/A	5.064	60.14	0	0
SLC35C2	ENSG00000080189	protein_coding	-0.440366	5.74	46.03	0	0
CRYBG3	ENSG00000080200	protein_coding	-2.49856	10.729	62.89	0	0
EPHA6	ENSG00000080224	protein_coding	-1.96248	3.971	64.59	0	0
SCTR	ENSG00000080293	protein_coding	#N/A	2.275	53.16	0	0
RFX3	ENSG00000080298	protein_coding	0.535494	9.307	65	0	0
RIF1	ENSG00000080345	protein_coding	-1.68317	15.003	61.96	0	0
RAB21	ENSG00000080371	protein_coding	1.57908	15.546	62.86	0	0
SLC4A4	ENSG00000080493	protein_coding	-0.605427	7.64	62.46	0	0
SMARCA2	ENSG00000080503	protein_coding	0.0444275	7.061	59.63	0	0
RDH8	ENSG00000080511	protein_coding	#N/A	1.715	49.01	0	0
SESN1	ENSG00000080546	protein_coding	0.929008	3.509	62.34	0	0
MID2	ENSG00000080561	protein_coding	-1.50808	2.876	59.9	0	0
PIH1D3	ENSG00000080572	protein_coding	#N/A	1.926	63.06	0	0
COL5A3	ENSG00000080573	protein_coding	#N/A	6.174	47.66	0	0
SRCAP	ENSG00000080603	protein_coding	-2.23815	11.754	50.37	0	0
PUM3	ENSG00000080608	protein_coding	#N/A	2.321	60.39	0	0
CPB2	ENSG00000080618	protein_coding	#N/A	1.717	61	0	0
CHRNA3	ENSG00000080644	protein_coding	#N/A	3.202	52.98	0	0
KCNN2	ENSG00000080709	protein_coding	#N/A	3.076	61.65	0	0
CNOT4	ENSG00000080802	protein_coding	0.493865	4.642	62.81	0	0
PSEN1	ENSG00000080815	protein_coding	-0.348895	6.078	57.27	0	0
CPOX	ENSG00000080819	protein_coding	-0.325085	2.825	61.93	1	0
CLDND1	ENSG00000080822	protein_coding	-1.02726	2.818	61.09	0	0
MOK	ENSG00000080823	protein_coding	-1.58972	3.809	53.49	0	0
HSP90AA1	ENSG00000080824	protein_coding	0.482255	3.51	52.75	1	0
RBL1	ENSG00000080839	protein_coding	-0.51977	5.684	56.93	0	0
DLGAP4	ENSG00000080845	protein_coding	0.905673	5.056	48.91	0	0
IGSF9B	ENSG00000080854	protein_coding	-1.93441	5.05	43.34	0	0
CFHR2	ENSG00000080910	protein_coding	#N/A	1.059	64.25	0	0
NDC80	ENSG00000080986	protein_coding	-0.395322	2.172	63.64	1	0
AP4E1	ENSG00000081014	protein_coding	-1.13955	6.758	62.08	0	0
RSBN1	ENSG00000081019	protein_coding	-0.881494	6.621	62.78	1	0
MAGI3	ENSG00000081026	protein_coding	-2.44918	6.508	62.89	0	0
CXCL2	ENSG00000081041	protein_coding	#N/A	1.218	51.84	0	0
AFP	ENSG00000081051	protein_coding	#N/A	2.484	65.49	0	0
COL4A4	ENSG00000081052	protein_coding	1.64508	9.895	59.07	0	0
TCF7	ENSG00000081059	protein_coding	#N/A	5.34	45.46	0	0
OSTM1	ENSG00000081087	protein_coding	0.488258	4.467	57.52	0	0
CDH7	ENSG00000081138	protein_coding	#N/A	12.231	64.73	0	0
IMPG2	ENSG00000081148	protein_coding	#N/A	8.337	62.4	0	0
PCNP	ENSG00000081154	protein_coding	0.242987	2.342	60.18	0	0
EXD2	ENSG00000081177	protein_coding	-0.975926	5.107	58.63	0	0
ARG2	ENSG00000081181	protein_coding	1.06848	2.045	57.8	0	0
MEF2C	ENSG00000081189	protein_coding	0.597453	7.561	63.95	0	0
PTPRC	ENSG00000081237	protein_coding	#N/A	5.164	65.75	0	0
CACNA1S	ENSG00000081248	protein_coding	#N/A	6.166	48.4	0	0
PKP1	ENSG00000081277	protein_coding	#N/A	5.447	47.75	0	0
UBA5	ENSG00000081307	protein_coding	-0.44537	3.902	63.24	0	0
STK17B	ENSG00000081320	protein_coding	-0.141155	5.287	62.33	0	0
CDC14B	ENSG00000081377	protein_coding	-1.99616	5.589	57.16	0	0
ZNF510	ENSG00000081386	protein_coding	-1.69569	5.616	61.02	0	0
LRP2	ENSG00000081479	protein_coding	-1.57409	15.808	60.4	0	0
ZNF506	ENSG00000081665	protein_coding	#N/A	4.14	59.51	0	0
JMJD4	ENSG00000081692	protein_coding	-0.857386	3.749	38.74	0	0
DUSP12	ENSG00000081721	protein_coding	-1.15585	1.27	60.13	0	0
AACS	ENSG00000081760	protein_coding	0.758421	6.646	48.78	0	0
KIAA0141	ENSG00000081791	protein_coding	0.449946	4.97	51.79	0	0
SLC13A1	ENSG00000081800	protein_coding	#N/A	3.815	64.27	0	0
CADPS2	ENSG00000081803	protein_coding	-0.343954	6.066	63.44	0	0
PCDHB4	ENSG00000081818	protein_coding	#N/A	3.825	54.33	0	0
PCDHA6	ENSG00000081842	protein_coding	#N/A	5.374	59.8	0	0
PCDHGA2	ENSG00000081853	protein_coding	#N/A	4.605	54.82	0	0
HSPB11	ENSG00000081870	protein_coding	0.579145	0.915	59.83	0	0
PHLPP1	ENSG00000081913	protein_coding	-0.251462	6.39	60.53	0	0
ATP8B1	ENSG00000081923	protein_coding	#N/A	5.818	57.01	0	0
IL12RB2	ENSG00000081985	protein_coding	1.0658	4.04	58.35	0	0
SMARCD3	ENSG00000082014	protein_coding	-1.1365	2.415	43.86	0	0
WDR70	ENSG00000082068	protein_coding	-0.345054	5.716	61	0	0
FYB	ENSG00000082074	protein_coding	#N/A	4.75	62.03	0	0
MPP4	ENSG00000082126	protein_coding	#N/A	2.462	58.62	0	0
STRADB	ENSG00000082146	protein_coding	-2.07653	2.293	61.77	0	0
BZW1	ENSG00000082153	protein_coding	-0.719924	6.875	58.88	1	0
PGR	ENSG00000082175	protein_coding	#N/A	13.748	62.27	0	0
C1QTNF3	ENSG00000082196	protein_coding	#N/A	2.802	59.92	0	0
ME2	ENSG00000082212	protein_coding	0.935004	9.1	61.4	0	0
C5orf22	ENSG00000082213	protein_coding	0.600904	3.612	60.12	0	0
CCNT2	ENSG00000082258	protein_coding	-1.7153	6.917	62.52	0	0
FAM135A	ENSG00000082269	protein_coding	-2.207	6.415	63.91	0	0
COL19A1	ENSG00000082293	protein_coding	-1.06413	6.233	63.43	0	0
EPB41L3	ENSG00000082397	protein_coding	0.608278	6.962	60.17	0	0
COBLL1	ENSG00000082438	protein_coding	-0.485946	9.523	63.73	0	0
DLG3	ENSG00000082458	protein_coding	-0.0964045	6.112	53.11	0	0
KCNK2	ENSG00000082482	protein_coding	#N/A	3.379	63.63	0	0
SERTAD4	ENSG00000082497	protein_coding	1.2777	5.219	56.85	0	0
TRAF5	ENSG00000082512	protein_coding	-0.371141	4.958	55.35	0	0
MRPL22	ENSG00000082515	protein_coding	1.20561	3.176	61.17	0	0
GEMIN5	ENSG00000082516	protein_coding	-0.633935	5.397	58.67	1	0
OPRK1	ENSG00000082556	protein_coding	#N/A	5.196	57.88	0	0
NFE2L1	ENSG00000082641	protein_coding	0.420767	4.774	45.65	0	0
SEMA5B	ENSG00000082684	protein_coding	#N/A	4.933	49.84	0	0
GSK3B	ENSG00000082701	protein_coding	-0.928447	7.711	62.85	0	0
ITGB5	ENSG00000082781	protein_coding	-1.13446	4.372	53.39	0	0
ERC1	ENSG00000082805	protein_coding	-0.801194	9.241	60.65	0	0
XPO1	ENSG00000082898	protein_coding	-0.977372	6.776	59.1	0	0
RNF13	ENSG00000082996	protein_coding	-1.04114	2.866	63.61	0	0
TRPM3	ENSG00000083067	protein_coding	#N/A	12.258	61.96	0	0
PALB2	ENSG00000083093	protein_coding	-2.07487	4.003	56.47	0	0
DOPEY1	ENSG00000083097	protein_coding	-1.68115	8.21	64.04	0	0
LYRM2	ENSG00000083099	protein_coding	0.858562	5.353	55.63	0	0
BCKDHB	ENSG00000083123	protein_coding	0.141356	3.692	63.18	0	0
KAT6A	ENSG00000083168	protein_coding	-1.30413	9.285	61.11	0	0
ZCCHC6	ENSG00000083223	protein_coding	-1.38929	5.724	62.01	0	0
ULK2	ENSG00000083290	protein_coding	-4.02975	6.01	58.55	0	0
GRHL2	ENSG00000083307	protein_coding	#N/A	5.239	59.08	0	0
TNPO1	ENSG00000083312	protein_coding	-0.857176	11.183	62.75	1	0
PLOD1	ENSG00000083444	protein_coding	0.551279	2.94	46.46	0	0
P2RX5	ENSG00000083454	protein_coding	#N/A	2.309	42.05	0	0
ITGAE	ENSG00000083457	protein_coding	-0.440573	3.858	49.12	0	0
DIS3	ENSG00000083520	protein_coding	-1.17151	10.604	63.54	1	0
PIBF1	ENSG00000083535	protein_coding	-1.15638	3.154	63.01	0	0
TDRD3	ENSG00000083544	protein_coding	-0.772522	3.234	63.59	0	0
NUFIP1	ENSG00000083635	protein_coding	-0.296326	3.492	61.29	0	0
PDS5B	ENSG00000083642	protein_coding	-0.86151	7.497	63.38	1	0
OXCT1	ENSG00000083720	protein_coding	0.875106	3.388	62.52	1	0
RRAGB	ENSG00000083750	protein_coding	-1.4184	2.061	59.13	0	0
EPYC	ENSG00000083782	protein_coding	#N/A	1.539	65.14	0	0
CYLD	ENSG00000083799	protein_coding	-1.85542	8.503	63.58	0	0
SLC27A5	ENSG00000083807	protein_coding	-1.70044	5.032	48.64	0	0
ZNF324	ENSG00000083812	protein_coding	-0.654004	5.653	42.25	0	0
ZNF671	ENSG00000083814	protein_coding	#N/A	2.903	50.56	0	0
ZNF416	ENSG00000083817	protein_coding	-0.199564	2.561	51.39	0	0
ZNF586	ENSG00000083828	protein_coding	-0.429113	2.265	53.87	0	0
ZNF446	ENSG00000083838	protein_coding	0.0415193	3.922	40.86	0	0
ZNF264	ENSG00000083844	protein_coding	-0.781943	12.163	55.53	0	0
RPS5	ENSG00000083845	protein_coding	-0.291101	1.747	48.85	0	0
FAT1	ENSG00000083857	protein_coding	-1.41733	14.786	58.47	1	0
YTHDC1	ENSG00000083896	protein_coding	-0.793087	6.232	64.6	0	0
CHMP2B	ENSG00000083937	protein_coding	-0.113898	2.557	65.22	0	0
SMAP2	ENSG00000084070	protein_coding	0.745553	2.939	58.05	0	0
PPIE	ENSG00000084072	protein_coding	0.88436	4.651	54.96	0	0
ZMPSTE24	ENSG00000084073	protein_coding	0.443213	3.108	59.22	1	0
STARD7	ENSG00000084090	protein_coding	-1.81431	3.368	57.03	1	0
NOA1	ENSG00000084092	protein_coding	-1.05202	3.415	54.34	0	0
REST	ENSG00000084093	protein_coding	-0.487477	7.3	57.13	0	0
HAL	ENSG00000084110	protein_coding	#N/A	3.913	56.64	0	0
SSH1	ENSG00000084112	protein_coding	-1.8661	13.04	51.57	0	0
GSTP1	ENSG00000084207	protein_coding	-1.92279	1.681	36.95	0	1
APLP2	ENSG00000084234	protein_coding	-0.096341	3.727	56.4	1	0
FAM234B	ENSG00000084444	protein_coding	#N/A	4.808	56.77	0	0
SLCO1A2	ENSG00000084453	protein_coding	#N/A	7.682	63.36	0	0
WBP11	ENSG00000084463	protein_coding	0.205844	4.646	62.83	0	0
EIF3I	ENSG00000084623	protein_coding	0.266633	1.458	49.5	0	0
NKAIN1	ENSG00000084628	protein_coding	#N/A	2.589	49.54	0	0
COL16A1	ENSG00000084636	protein_coding	#N/A	5.736	44	0	1
TXLNA	ENSG00000084652	protein_coding	-0.411222	5.012	49.7	1	0
APOB	ENSG00000084674	protein_coding	#N/A	14.121	57.03	0	0
NCOA1	ENSG00000084676	protein_coding	-1.02995	7.405	62.9	0	0
AGBL5	ENSG00000084693	protein_coding	-2.17976	3.261	51.53	0	1
EFR3B	ENSG00000084710	protein_coding	1	7.434	51.62	0	0
KIF3C	ENSG00000084731	protein_coding	-0.721284	5.462	51.75	0	0
RAB10	ENSG00000084733	protein_coding	0.223883	3.535	59.38	0	0
GCKR	ENSG00000084734	protein_coding	#N/A	2.186	54.67	0	0
HADHA	ENSG00000084754	protein_coding	-0.70629	3.037	58.07	0	0
MAPRE3	ENSG00000084764	protein_coding	2.67417	1.892	54.11	0	0
CAD	ENSG00000084774	protein_coding	-0.444657	7.265	48.83	0	0
CD59	ENSG00000085063	protein_coding	0.889186	3.716	55.97	0	0
CD82	ENSG00000085117	protein_coding	#N/A	2.289	46.45	0	0
BCORL1	ENSG00000085185	protein_coding	0.921288	7.127	50.3	0	0
ATRX	ENSG00000085224	protein_coding	-2.2185	11.22	62.27	0	0
AK6	ENSG00000085231	protein_coding	#N/A	1.648	58.36	0	0
FCN1	ENSG00000085265	protein_coding	#N/A	4.369	47.13	0	0
MYNN	ENSG00000085274	protein_coding	-1.98423	4.999	62.71	0	0
MECOM	ENSG00000085276	protein_coding	-0.717732	5.732	62.55	0	0
SCAMP1	ENSG00000085365	protein_coding	0.766969	4.509	62.41	0	0
PREP	ENSG00000085377	protein_coding	0.793365	2.905	59.05	0	0
HACE1	ENSG00000085382	protein_coding	-2.03966	5.318	62.61	0	0
SEH1L	ENSG00000085415	protein_coding	-0.0426767	5.206	56.45	1	0
WDR47	ENSG00000085433	protein_coding	-0.447971	4.24	58.83	0	0
WDFY1	ENSG00000085449	protein_coding	0.54979	4.66	57.28	0	0
OVGP1	ENSG00000085465	protein_coding	-5.59246	2.243	54.3	0	0
SLC25A24	ENSG00000085491	protein_coding	-0.439689	4.271	60.56	1	0
MAP3K4	ENSG00000085511	protein_coding	-2.4756	5.49	61.21	1	0
PILRA	ENSG00000085514	protein_coding	-4.24793	1.316	51.32	0	0
IGSF9	ENSG00000085552	protein_coding	#N/A	4.205	44.19	0	0
ABCB1	ENSG00000085563	protein_coding	2.32777	4.778	62.96	0	0
ZNF213	ENSG00000085644	protein_coding	-1.01089	5.889	46.53	0	0
AKR1B1	ENSG00000085662	protein_coding	1.14698	1.93	49.96	0	0
CPNE3	ENSG00000085719	protein_coding	-0.143989	4.865	62.38	1	0
RRN3	ENSG00000085721	protein_coding	-0.562285	3.762	57.91	0	0
CTTN	ENSG00000085733	protein_coding	-0.160313	3.272	47.19	0	0
WNT11	ENSG00000085741	protein_coding	#N/A	1.93	42.16	0	0
MTIF2	ENSG00000085760	protein_coding	-2.06821	2.528	60.4	0	0
DDHD2	ENSG00000085788	protein_coding	-1.31817	4.921	57.75	1	0
TTC39A	ENSG00000085831	protein_coding	1.73434	6.287	48.6	0	0
EPS15	ENSG00000085832	protein_coding	-0.754546	5.225	61.95	0	0
ORC1	ENSG00000085840	protein_coding	-0.924007	3.157	55.24	0	0
MGST2	ENSG00000085871	protein_coding	1.66022	1.78	56.54	0	0
CHERP	ENSG00000085872	protein_coding	2.43407	4.173	42.7	0	0
ATG16L1	ENSG00000085978	protein_coding	-0.77329	4.208	54.67	0	0
USP40	ENSG00000085982	protein_coding	-2.04348	5.692	61.14	0	0
POMGNT1	ENSG00000085998	protein_coding	-1.3061	3.48	50.61	0	0
RAD54L	ENSG00000085999	protein_coding	-1.14419	3.108	53.5	0	0
MAST2	ENSG00000086015	protein_coding	-1.08558	5.738	58.68	0	0
DNAJA1	ENSG00000086061	protein_coding	-0.432447	2.381	58.78	1	0
B4GALT1	ENSG00000086062	protein_coding	1.4039	4.201	52.9	0	0
CHMP5	ENSG00000086065	protein_coding	0.208011	1.957	58.35	0	0
NFX1	ENSG00000086102	protein_coding	-1.34302	4.604	57.43	0	0
AQP6	ENSG00000086159	protein_coding	#N/A	5.129	42.48	0	0
DIMT1	ENSG00000086189	protein_coding	-0.355729	2.859	60.05	0	0
IPO11	ENSG00000086200	protein_coding	-0.752733	4.356	61.7	0	0
FOLH1	ENSG00000086205	protein_coding	#N/A	2.697	64.36	0	0
EIF2AK1	ENSG00000086232	protein_coding	-0.749931	4.469	55.3	0	0
NME8	ENSG00000086288	protein_coding	#N/A	2.312	62.53	0	0
EPDR1	ENSG00000086289	protein_coding	2.7794	2.599	61.63	1	0
SNX10	ENSG00000086300	protein_coding	1.51165	2.613	57.34	0	0
SEPHS1	ENSG00000086475	protein_coding	-0.164918	3.273	54.22	1	0
MRPL28	ENSG00000086504	protein_coding	1.67281	2.229	35.15	0	0
HBQ1	ENSG00000086506	protein_coding	#N/A	0.536	28.12	0	0
ITPKC	ENSG00000086544	protein_coding	0.514012	3.385	48.68	0	0
CEACAM6	ENSG00000086548	protein_coding	#N/A	2.7	54.09	0	0
FAT2	ENSG00000086570	protein_coding	#N/A	14.534	53.65	0	0
RBM22	ENSG00000086589	protein_coding	-0.311493	2.342	56.73	0	0
TMED2	ENSG00000086598	protein_coding	0.522929	2.56	57.73	1	0
ERO1B	ENSG00000086619	protein_coding	#N/A	4.567	62.53	0	0
ZFAND6	ENSG00000086666	protein_coding	0.676012	2.594	61.83	0	0
HSD17B2	ENSG00000086696	protein_coding	#N/A	7.925	57.61	0	0
TXLNG	ENSG00000086712	protein_coding	0.154653	4.401	57.07	0	0
PPEF1	ENSG00000086717	protein_coding	#N/A	2.89	58.29	0	0
LAT2	ENSG00000086730	protein_coding	#N/A	2.527	46.93	0	0
HUWE1	ENSG00000086758	protein_coding	-1.24551	14.796	58.8	0	0
ZW10	ENSG00000086827	protein_coding	-0.874565	2.992	60.85	0	0
ALG9	ENSG00000086848	protein_coding	-0.316184	4.485	59.31	0	0
MYBPC2	ENSG00000086967	protein_coding	#N/A	3.593	46.22	0	0
NOX4	ENSG00000086991	protein_coding	#N/A	4.184	64.53	0	0
ACOX3	ENSG00000087008	protein_coding	-1.01519	2.86	48.07	0	0
MTMR2	ENSG00000087053	protein_coding	-0.599552	4.681	63.44	0	0
PPP1R15A	ENSG00000087074	protein_coding	-2.06471	2.378	43.32	0	1
HSD17B14	ENSG00000087076	protein_coding	#N/A	1.238	48.51	0	0
TRIP6	ENSG00000087077	protein_coding	1.16645	1.942	43.55	0	0
ACHE	ENSG00000087085	protein_coding	#N/A	2.956	35.51	0	0
FTL	ENSG00000087086	protein_coding	-1.75346	0.878	44.04	0	1
SRRT	ENSG00000087087	protein_coding	-0.298754	2.964	46.83	0	0
BAX	ENSG00000087088	protein_coding	0.67714	1.358	46.43	0	0
NLK	ENSG00000087095	protein_coding	-1.25956	4.047	62.7	0	0
PIGS	ENSG00000087111	protein_coding	-0.483978	3.088	52.73	0	0
ADAMTS2	ENSG00000087116	protein_coding	#N/A	6.754	46.13	0	0
TMPRSS11E	ENSG00000087128	protein_coding	#N/A	2.136	63.31	0	0
ATXN7L3	ENSG00000087152	protein_coding	-2.29134	3.811	40.85	0	0
PGS1	ENSG00000087157	protein_coding	-0.377756	3.062	47.96	0	0
PSMC5	ENSG00000087191	protein_coding	1.06247	2.586	49.05	0	0
UIMC1	ENSG00000087206	protein_coding	-1.86774	2.57	57.62	0	0
CETP	ENSG00000087237	protein_coding	#N/A	1.791	49.2	0	0
MMP2	ENSG00000087245	protein_coding	#N/A	3.741	54.33	0	0
MT3	ENSG00000087250	protein_coding	#N/A	1.55	38.61	0	0
LPCAT2	ENSG00000087253	protein_coding	-0.101402	5.391	64.48	0	0
GNAO1	ENSG00000087258	protein_coding	#N/A	5.574	50.53	0	0
OGFOD1	ENSG00000087263	protein_coding	-0.549948	4.647	59.61	0	0
SH3BP2	ENSG00000087266	protein_coding	-1.62149	9.211	40.77	0	0
NOP14	ENSG00000087269	protein_coding	-1.31354	3.538	50.01	0	0
ADD1	ENSG00000087274	protein_coding	0.226737	5.179	55.16	0	0
L2HGDH	ENSG00000087299	protein_coding	-0.466673	6.414	59.22	0	0
TXNDC16	ENSG00000087301	protein_coding	-0.897454	4.564	63.17	0	0
C14orf166	ENSG00000087302	protein_coding	-0.00428051	7.075	63.27	0	0
NID2	ENSG00000087303	protein_coding	0.856194	4.811	56.75	0	0
GMCL1	ENSG00000087338	protein_coding	-1.99704	4.191	62.23	0	0
SF3B2	ENSG00000087365	protein_coding	-0.418832	3.932	51.59	1	0
KLHL42	ENSG00000087448	protein_coding	0.26018	6.703	56.97	0	0
GNAS	ENSG00000087460	protein_coding	0.991092	4.029	52.91	0	0
DNM1L	ENSG00000087470	protein_coding	-0.134876	4.439	61.79	0	0
PTHLH	ENSG00000087494	protein_coding	#N/A	1.891	59.74	0	0
PHACTR3	ENSG00000087495	protein_coding	#N/A	2.728	52.37	0	0
ERGIC2	ENSG00000087502	protein_coding	-0.807119	5.014	65.96	0	0
TFAP2C	ENSG00000087510	protein_coding	1.66297	2.866	51.03	0	0
AURKA	ENSG00000087586	protein_coding	0.436368	2.248	57.07	0	0
CASS4	ENSG00000087589	protein_coding	#N/A	2.888	54.78	0	0
PIR	ENSG00000087842	protein_coding	-0.434882	1.539	61.01	0	0
AAMDC	ENSG00000087884	protein_coding	-0.833808	0.726	58.18	0	0
RFX2	ENSG00000087903	protein_coding	-0.63743	3.993	52.46	0	0
METTL2A	ENSG00000087995	protein_coding	-0.252122	3.15	54.8	0	0
SULT2B1	ENSG00000088002	protein_coding	#N/A	1.447	48.25	0	0
ALG6	ENSG00000088035	protein_coding	-1.21035	3.371	62.07	0	0
CNOT3	ENSG00000088038	protein_coding	0.787323	4.516	42.09	0	0
GP6	ENSG00000088053	protein_coding	#N/A	2.268	51.69	0	0
PTPN4	ENSG00000088179	protein_coding	-3.57116	10.3	62.96	0	0
DDX18	ENSG00000088205	protein_coding	-0.886069	5.674	60.74	1	0
KHSRP	ENSG00000088247	protein_coding	0.529508	2.993	40.97	0	0
GNA11	ENSG00000088256	protein_coding	0.150417	4.147	38.34	0	0
ASAP3	ENSG00000088280	protein_coding	-0.681552	4.05	50.33	0	0
EDEM2	ENSG00000088298	protein_coding	-1.93383	1.919	54.18	0	0
DNMT3B	ENSG00000088305	protein_coding	-0.857396	4.336	50.6	0	0
REM1	ENSG00000088320	protein_coding	#N/A	1.665	49.33	0	0
TPX2	ENSG00000088325	protein_coding	-0.763756	3.605	58.48	0	0
PDRG1	ENSG00000088356	protein_coding	0.481317	1.998	50.59	0	0
EPB41L1	ENSG00000088367	protein_coding	-1.09311	6.665	50.02	0	0
SLC15A1	ENSG00000088386	protein_coding	#N/A	3.106	55.49	0	0
DOCK9	ENSG00000088387	protein_coding	-1.43689	11.831	58.22	0	0
ANKRD10	ENSG00000088448	protein_coding	-1.73085	2.495	60	0	1
TGDS	ENSG00000088451	protein_coding	-1.03769	1.905	63.02	0	0
DOCK3	ENSG00000088538	protein_coding	-2.76323	8.755	59.85	0	0
C3orf18	ENSG00000088543	protein_coding	#N/A	2.655	44.02	0	0
COQ9	ENSG00000088682	protein_coding	-0.769756	1.827	54.17	0	0
TMEM40	ENSG00000088726	protein_coding	#N/A	2.308	51.39	0	0
KIF9	ENSG00000088727	protein_coding	-1.46713	3.357	51.55	0	0
ARHGAP28	ENSG00000088756	protein_coding	1.04495	5.492	60.9	0	0
CRLS1	ENSG00000088766	protein_coding	-0.92797	3.958	60.64	0	0
DEFB127	ENSG00000088782	protein_coding	#N/A	0.514	60.15	0	0
PPP1R13B	ENSG00000088808	protein_coding	0.070527	4.958	55.49	0	0
ATRN	ENSG00000088812	protein_coding	-0.626405	8.633	59.66	0	0
SMOX	ENSG00000088826	protein_coding	-0.522953	2.322	50.13	0	0
SIGLEC1	ENSG00000088827	protein_coding	#N/A	6.72	43.75	0	0
FKBP1A	ENSG00000088832	protein_coding	2.8234	1.622	54.53	0	0
NSFL1C	ENSG00000088833	protein_coding	0.669128	3.799	54.14	0	0
SLC4A11	ENSG00000088836	protein_coding	-0.237039	3.229	38.7	0	0
C20orf194	ENSG00000088854	protein_coding	-0.786921	6.869	56.21	0	0
ZNF343	ENSG00000088876	protein_coding	-2.30447	3.675	56.96	0	0
EBF4	ENSG00000088881	protein_coding	#N/A	2.91	50.78	0	0
CPXM1	ENSG00000088882	protein_coding	#N/A	2.391	40.28	0	0
MAVS	ENSG00000088888	protein_coding	1.54683	11.714	47.48	0	0
LZTS3	ENSG00000088899	protein_coding	-1.38904	5.257	40.6	0	0
F11	ENSG00000088926	protein_coding	#N/A	2.396	59.88	0	0
XRN2	ENSG00000088930	protein_coding	-0.66284	3.437	62.78	1	0
KIZ	ENSG00000088970	protein_coding	#N/A	3.856	58.83	0	0
DYNLL1	ENSG00000088986	protein_coding	1.09917	1.376	52.96	0	0
TESC	ENSG00000088992	protein_coding	2.10992	1.057	48.6	0	0
SNX5	ENSG00000089006	protein_coding	-2.55888	3.931	57.87	0	0
RPL6	ENSG00000089009	protein_coding	-0.528481	2.008	54.33	0	0
SIRPG	ENSG00000089012	protein_coding	#N/A	1.732	56.27	0	0
MAPKAPK5	ENSG00000089022	protein_coding	-2.44132	11.349	56.22	0	0
P2RX7	ENSG00000089041	protein_coding	#N/A	5.161	53.71	0	0
ESF1	ENSG00000089048	protein_coding	-1.14912	3.216	62.03	0	0
RBBP9	ENSG00000089050	protein_coding	2.05232	3.861	58.32	0	0
ANAPC5	ENSG00000089053	protein_coding	-0.90717	6.149	55.45	0	0
SLC23A2	ENSG00000089057	protein_coding	1.14813	6.962	55.07	0	0
SLC8B1	ENSG00000089060	protein_coding	#N/A	3.289	50.07	0	0
TMEM230	ENSG00000089063	protein_coding	1.57321	1.735	55.02	0	0
DZANK1	ENSG00000089091	protein_coding	-0.350497	3.739	58.29	0	0
KDM2B	ENSG00000089094	protein_coding	-0.289914	6.676	49.21	0	0
CFAP61	ENSG00000089101	protein_coding	#N/A	4.082	58.67	0	0
LHX5	ENSG00000089116	protein_coding	#N/A	2.939	39.11	0	0
TASP1	ENSG00000089123	protein_coding	-2.99447	2.352	62.68	0	0
OAS1	ENSG00000089127	protein_coding	#N/A	2.416	56.66	0	0
GCN1	ENSG00000089154	protein_coding	#N/A	8.675	50.33	0	0
RPLP0	ENSG00000089157	protein_coding	-1.66881	2.591	51.08	0	0
PXN	ENSG00000089159	protein_coding	1.7546	5.457	46.99	0	0
SIRT4	ENSG00000089163	protein_coding	#N/A	1.217	51.23	0	0
RPH3A	ENSG00000089169	protein_coding	#N/A	5.188	56.21	0	0
KIF16B	ENSG00000089177	protein_coding	-1.7868	5.261	59.3	0	0
TRMT6	ENSG00000089195	protein_coding	-0.434682	3.025	57.44	0	0
CHGB	ENSG00000089199	protein_coding	#N/A	2.55	57.13	0	0
PEBP1	ENSG00000089220	protein_coding	1.91549	1.697	50.81	0	0
TBX5	ENSG00000089225	protein_coding	#N/A	3.825	54.15	0	0
BRAP	ENSG00000089234	protein_coding	0.0355537	4.026	55.59	0	0
ERP29	ENSG00000089248	protein_coding	0.134679	1.735	52.78	0	0
NOS1	ENSG00000089250	protein_coding	#N/A	12.283	52.65	0	0
FUS	ENSG00000089280	protein_coding	2.44082	5.119	53.13	0	0
IGBP1	ENSG00000089289	protein_coding	-0.376028	1.862	57.11	0	0
FXYD5	ENSG00000089327	protein_coding	4.86423	1.58	50.13	0	0
ZNF302	ENSG00000089335	protein_coding	0.632345	3.839	60.17	0	0
GRAMD1A	ENSG00000089351	protein_coding	1.87814	2.825	44.32	0	0
FXYD3	ENSG00000089356	protein_coding	#N/A	1.467	46.13	0	0
HEPH	ENSG00000089472	protein_coding	#N/A	6.013	61.49	0	0
CDIP1	ENSG00000089486	protein_coding	2.14743	3.009	48.03	0	0
CMTM1	ENSG00000089505	protein_coding	#N/A	1.064	56.7	0	0
KCNH4	ENSG00000089558	protein_coding	#N/A	3.92	44.99	0	0
GANAB	ENSG00000089597	protein_coding	0.156109	3.906	49.98	0	0
GMIP	ENSG00000089639	protein_coding	-0.0329146	3.538	43.86	0	0
RBM41	ENSG00000089682	protein_coding	-1.50513	3.315	63.98	0	0
BIRC5	ENSG00000089685	protein_coding	-0.221739	2.711	50.73	1	0
LAG3	ENSG00000089692	protein_coding	#N/A	2.587	42.63	0	0
MLF2	ENSG00000089693	protein_coding	1.10096	1.969	47.73	0	0
OTUB2	ENSG00000089723	protein_coding	0.529253	3.922	47.23	0	0
DDX24	ENSG00000089737	protein_coding	0.154808	5.612	56.63	0	0
ZBTB25	ENSG00000089775	protein_coding	-0.0962153	10.372	57.75	0	0
NECAP1	ENSG00000089818	protein_coding	0.624491	3.129	57.93	0	0
ARHGAP4	ENSG00000089820	protein_coding	#N/A	3.372	41.86	0	0
ANKRD24	ENSG00000089847	protein_coding	#N/A	4.026	46.4	0	0
DHX32	ENSG00000089876	protein_coding	-0.624112	3.07	58.55	0	0
RCOR1	ENSG00000089902	protein_coding	0.396944	5.754	56.52	0	0
GPATCH2L	ENSG00000089916	protein_coding	-1.20896	14.007	60.24	0	0
LTBP4	ENSG00000090006	protein_coding	-0.417139	5.032	43.52	0	0
BLVRB	ENSG00000090013	protein_coding	2.11867	1.392	50.2	0	0
SLC9A1	ENSG00000090020	protein_coding	1.5645	4.516	48.29	0	1
SPTLC1	ENSG00000090054	protein_coding	-0.184672	1.894	58.4	1	0
PAPOLA	ENSG00000090060	protein_coding	-0.671377	4.519	63.43	0	0
CCNK	ENSG00000090061	protein_coding	0.961314	5.627	49.86	0	0
PCBP4	ENSG00000090097	protein_coding	0.152003	2.599	41.25	0	0
RGS1	ENSG00000090104	protein_coding	#N/A	2.653	66.11	0	0
YPEL3	ENSG00000090238	protein_coding	#N/A	1.941	41.59	0	0
MRPS33	ENSG00000090263	protein_coding	0.271673	4.241	58.17	0	0
NDUFB2	ENSG00000090266	protein_coding	0.863399	1.666	56.43	0	0
NUDC	ENSG00000090273	protein_coding	1.29422	1.8	51.57	0	0
MAEA	ENSG00000090316	protein_coding	0.31783	5.371	44.97	0	0
ICAM1	ENSG00000090339	protein_coding	#N/A	3.252	47.92	0	0
STRN4	ENSG00000090372	protein_coding	-0.828786	3.628	42.65	0	0
IRAK3	ENSG00000090376	protein_coding	#N/A	8.663	59.9	0	0
LYZ	ENSG00000090382	protein_coding	#N/A	1.53	63.39	0	0
SI	ENSG00000090402	protein_coding	#N/A	6.011	68.74	0	0
MUL1	ENSG00000090432	protein_coding	0.700014	2.438	52.48	0	0
TFAP4	ENSG00000090447	protein_coding	0.209453	6.491	43.61	0	0
PDCD7	ENSG00000090470	protein_coding	0.0433274	2.851	54.28	1	0
SPG21	ENSG00000090487	protein_coding	-0.607024	2.059	55.96	0	0
FETUB	ENSG00000090512	protein_coding	#N/A	1.64	58.66	0	0
DNAJB11	ENSG00000090520	protein_coding	0.129125	4.079	59.93	0	0
P3H2	ENSG00000090530	protein_coding	#N/A	3.509	61.82	0	0
THPO	ENSG00000090534	protein_coding	#N/A	1.855	49.42	0	0
CHRD	ENSG00000090539	protein_coding	#N/A	4.719	40.63	0	0
FLT3LG	ENSG00000090554	protein_coding	#N/A	1.301	46.01	0	0
RAB11FIP3	ENSG00000090565	protein_coding	-2.14349	4.831	47.15	0	0
GNPTG	ENSG00000090581	protein_coding	-0.961526	2.4	43.52	0	0
ZNF268	ENSG00000090612	protein_coding	-1.24924	13.475	58.02	0	0
GOLGA3	ENSG00000090615	protein_coding	-1.17563	9.252	46.44	0	0
PABPC4	ENSG00000090621	protein_coding	-0.0406618	3.592	52.73	0	0
CD209	ENSG00000090659	protein_coding	#N/A	4.283	46.9	0	0
CERS4	ENSG00000090661	protein_coding	1.30724	2.401	47.12	0	0
MCOLN1	ENSG00000090674	protein_coding	0.866046	2.253	42.99	0	0
USP48	ENSG00000090686	protein_coding	-0.409244	4.595	58.16	0	0
EFNB1	ENSG00000090776	protein_coding	0.927355	3.314	43.57	0	0
PDPR	ENSG00000090857	protein_coding	-2.42602	9.255	52.68	0	0
AARS	ENSG00000090861	protein_coding	-0.138103	3.477	50.53	0	0
GLG1	ENSG00000090863	protein_coding	-0.58229	8.261	57.62	0	0
KIF4A	ENSG00000090889	protein_coding	-0.694807	4.348	59.52	1	0
TNRC6A	ENSG00000090905	protein_coding	-1.98558	8.438	57.41	0	0
PLEKHG2	ENSG00000090924	protein_coding	1.24576	8.132	43.23	0	0
DLL3	ENSG00000090932	protein_coding	#N/A	2.332	43.16	0	0
NAT14	ENSG00000090971	protein_coding	-0.297905	1.536	33.92	0	0
PITPNM2	ENSG00000090975	protein_coding	-1.76818	6.785	48.65	0	0
EXOC1	ENSG00000090989	protein_coding	-0.800665	3.551	65.01	0	0
RBM27	ENSG00000091009	protein_coding	-0.607764	6.451	61.3	0	0
POU4F3	ENSG00000091010	protein_coding	#N/A	1.182	40.15	0	0
OSBPL8	ENSG00000091039	protein_coding	-0.651624	7.239	63.52	0	0
DTX2	ENSG00000091073	protein_coding	0.309684	2.769	45.72	0	0
NLRC4	ENSG00000091106	protein_coding	#N/A	3.581	57.12	0	0
PUS7	ENSG00000091127	protein_coding	-0.728538	3.48	57	0	0
LAMB4	ENSG00000091128	protein_coding	#N/A	5.858	59.29	0	0
NRCAM	ENSG00000091129	protein_coding	1.11672	6.685	61	0	0
LAMB1	ENSG00000091136	protein_coding	1.57774	5.766	57.58	1	0
SLC26A4	ENSG00000091137	protein_coding	#N/A	4.93	60.1	0	0
SLC26A3	ENSG00000091138	protein_coding	#N/A	2.863	60.72	0	0
DLD	ENSG00000091140	protein_coding	1.18361	3.755	63.33	0	0
WDR7	ENSG00000091157	protein_coding	-1.4423	14.083	63.63	0	0
TXNL1	ENSG00000091164	protein_coding	1.2182	6.894	61.42	0	0
IL5RA	ENSG00000091181	protein_coding	#N/A	5.521	58.03	0	0
ABCC6	ENSG00000091262	protein_coding	#N/A	5.747	50.14	0	0
CMTM6	ENSG00000091317	protein_coding	0.0931094	3.863	61.32	1	0
ITGA6	ENSG00000091409	protein_coding	-0.0979752	5.618	58.2	0	0
RAPGEF4	ENSG00000091428	protein_coding	-0.491966	4.299	59.44	0	0
AC013461.1	ENSG00000091436	protein_coding	#N/A	7.179	61.09	0	0
SMPX	ENSG00000091482	protein_coding	#N/A	0.938	59.85	0	0
FH	ENSG00000091483	protein_coding	-0.387886	1.797	63.13	1	0
SEL1L3	ENSG00000091490	protein_coding	-0.228659	4.52	56.36	0	0
TF	ENSG00000091513	protein_coding	#N/A	4.602	54.79	0	0
CDV3	ENSG00000091527	protein_coding	0.0280438	3.621	57.6	0	0
MYO15A	ENSG00000091536	protein_coding	#N/A	11.863	44.8	0	0
ALKBH5	ENSG00000091542	protein_coding	-2.02056	2.748	49.76	0	0
APOH	ENSG00000091583	protein_coding	#N/A	1.176	57.12	0	0
NLRP1	ENSG00000091592	protein_coding	#N/A	5.444	53.26	0	0
PITPNM3	ENSG00000091622	protein_coding	#N/A	7.086	48.01	0	0
SPAG7	ENSG00000091640	protein_coding	-0.170541	1.668	48.35	0	0
ORC6	ENSG00000091651	protein_coding	0.0233981	1.833	55.84	0	0
ZFHX4	ENSG00000091656	protein_coding	-1.81293	14.019	63.62	0	0
SLC17A6	ENSG00000091664	protein_coding	#N/A	3.949	63.46	0	0
CPA1	ENSG00000091704	protein_coding	#N/A	1.931	43.84	0	0
ZC3HC1	ENSG00000091732	protein_coding	0.462742	2.017	55.54	0	0
ESR1	ENSG00000091831	protein_coding	#N/A	6.466	60.34	0	0
RGS17	ENSG00000091844	protein_coding	-2.46949	7.773	62.57	0	0
ANGPT2	ENSG00000091879	protein_coding	#N/A	5.416	59.29	0	0
TMEM101	ENSG00000091947	protein_coding	1.55492	1.83	50.06	0	0
CD200	ENSG00000091972	protein_coding	#N/A	2.129	61.39	0	0
CCDC80	ENSG00000091986	protein_coding	-0.159199	12.43	59.72	0	0
CMA1	ENSG00000092009	protein_coding	#N/A	0.937	48.44	0	0
PSME1	ENSG00000092010	protein_coding	1.00107	1.136	42.6	0	0
PPP2R3C	ENSG00000092020	protein_coding	-1.12769	1.846	57.8	0	0
HAUS4	ENSG00000092036	protein_coding	-1.13511	1.642	54.41	0	0
JPH4	ENSG00000092051	protein_coding	#N/A	4.386	43.31	0	0
MYH7	ENSG00000092054	protein_coding	#N/A	6.087	46.91	0	0
CEBPE	ENSG00000092067	protein_coding	#N/A	1.554	39	0	0
SLC7A8	ENSG00000092068	protein_coding	#N/A	4.216	52.87	0	0
OSGEP	ENSG00000092094	protein_coding	-1.59466	3.258	54.85	0	0
SLC22A17.1	ENSG00000092096	protein_coding	0.652077	2.455	42.14	0	0
RNF31	ENSG00000092098	protein_coding	-1.56181	3.627	47.08	0	0
SCFD1	ENSG00000092108	protein_coding	-1.04215	2.359	63.83	0	0
G2E3	ENSG00000092140	protein_coding	-1.2577	5.804	64.52	0	0
HECTD1	ENSG00000092148	protein_coding	-1.93943	9.134	60.65	1	0
HNRNPC	ENSG00000092199	protein_coding	-0.502509	4.501	60.22	1	0
RPGRIP1	ENSG00000092200	protein_coding	#N/A	3.94	55.6	0	0
SUPT16H	ENSG00000092201	protein_coding	-1.07359	4.684	59.59	1	0
TOX4	ENSG00000092203	protein_coding	0.239593	4.711	56.19	0	0
GEMIN2	ENSG00000092208	protein_coding	-0.664617	1.476	60.35	0	0
TGM1	ENSG00000092295	protein_coding	#N/A	2.777	45.06	0	0
TINF2	ENSG00000092330	protein_coding	-1.145	2.168	46.7	0	0
DAZL	ENSG00000092345	protein_coding	#N/A	3.104	60.87	0	0
TBL1Y	ENSG00000092377	protein_coding	#N/A	2.407	56.68	0	0
SEMA6A	ENSG00000092421	protein_coding	-0.237039	6.878	59.42	0	0
TRPM7	ENSG00000092439	protein_coding	-3.11	10.4	61.11	0	0
TYRO3	ENSG00000092445	protein_coding	-1.25921	8.207	46.81	0	0
WDR76	ENSG00000092470	protein_coding	-0.413315	3.978	58.13	0	0
CAPN3	ENSG00000092529	protein_coding	#N/A	3.228	53.15	0	0
SNAP23	ENSG00000092531	protein_coding	1.08913	2.687	57.75	0	0
TBX15	ENSG00000092607	protein_coding	#N/A	3.504	58.88	0	0
PHGDH	ENSG00000092621	protein_coding	-0.0383308	3.18	55.82	0	0
COL9A3	ENSG00000092758	protein_coding	#N/A	2.485	38.16	0	0
EZR	ENSG00000092820	protein_coding	0.660432	3.096	53.83	1	0
MYL6	ENSG00000092841	protein_coding	0.380325	1.564	48.44	0	0
AGO1	ENSG00000092847	protein_coding	-0.744452	13.708	55.16	0	0
TEKT2	ENSG00000092850	protein_coding	#N/A	1.738	41.68	0	0
CLSPN	ENSG00000092853	protein_coding	-0.756909	4.769	57.21	1	0
RFFL	ENSG00000092871	protein_coding	0.344446	7.293	56.66	0	0
UNC13D	ENSG00000092929	protein_coding	#N/A	4.393	40.33	0	0
MFSD11	ENSG00000092931	protein_coding	-0.310701	3.612	55.84	0	0
DPYSL2	ENSG00000092964	protein_coding	1.86982	4.805	55.03	0	0
TGFB2	ENSG00000092969	protein_coding	#N/A	5.053	58.15	1	0
GPATCH2	ENSG00000092978	protein_coding	-1.66789	5.851	63.64	0	0
NUP50	ENSG00000093000	protein_coding	-0.830498	5.233	56.38	1	0
CDC45	ENSG00000093009	protein_coding	-0.75829	2.09	51.97	0	0
COMT	ENSG00000093010	protein_coding	0.889929	2.437	46.59	0	0
CECR1	ENSG00000093072	protein_coding	#N/A	4.505	50.47	0	0
VNN3	ENSG00000093134	protein_coding	#N/A	1.761	62.34	0	0
ECHDC1	ENSG00000093144	protein_coding	0.0454067	2.585	64	0	0
LRRFIP2	ENSG00000093167	protein_coding	-1.81765	3.585	61.4	0	0
SEC22C	ENSG00000093183	protein_coding	-1.08351	5.955	56.71	0	0
XYLB	ENSG00000093217	protein_coding	-2.00624	3.664	55.17	0	0
HDAC6	ENSG00000094631	protein_coding	-1.15421	4.832	49.45	0	0
OR1I1	ENSG00000094661	protein_coding	#N/A	1.242	47.58	0	0
GABRP	ENSG00000094755	protein_coding	#N/A	3.576	54.66	0	0
KRT31	ENSG00000094796	protein_coding	#N/A	1.596	50.19	0	0
CDC6	ENSG00000094804	protein_coding	-0.678381	4.81	56.25	0	0
UPRT	ENSG00000094841	protein_coding	-0.11011	2.234	62.48	0	0
CDC23	ENSG00000094880	protein_coding	0.234687	3.155	58.79	0	0
AAAS	ENSG00000094914	protein_coding	0.462598	2.016	50.61	0	0
[truncated: 17,934 more rows]

## Sheet: C-Notes and Column definition
Notes:
Sequencing reads were mapped to the human genome assembly GRCh38 (hg38) with gene annotation (v.87)
A: U-2 OS cells treated with arsenite stress
geneID	Ensembl Gene ID V87
geneName	Gene name
geneType	Gene type
SG-proximal?	Defined as the overlap of three RNA enrichment datasets (G3BP1 vs. untargeted, post- vs. pre-enrichment, label vs. omit probe) (1=yes, 0=no)
SG-excluded?	Defined as the overlap of two RNA depletion datasets (G3BP1 vs. untargeted, post- vs. pre-enrichment) (1=yes, 0=no)
G3BP1 vs. untargeted	DESeq2 analysis between RNA labeled with G3BP1-miniSOG versus untargeted miniSOG
post- vs. pre-enrichment	DESeq2 analysis between post- versus pre-enrichment of RNA labeled with G3BP1-miniSOG
label vs. omit probe	DESeq2 analysis between RNA labeled with G3BP1-miniSOG versus RNA from negative control omitting PA
log2FC	log2 of RNA abundance ratio in each DESeq2 analysis
padj	adjusted p value counted in each DESeq2 analysis
enriched?	log2FC > 0.3, padj < 0.05 in DESeq2 analysis (1=yes, 0=no)
depleted?	log2FC < -0.3, padj < 0.05 in DESeq2 analysis (1=yes, 0=no)
B: features of mRNAs
geneID	Ensembl Gene ID referenced from Ensembl release 87
geneName	Gene name
geneType	Gene type
log2TE	Log2 of Translation Efficiency, which is defined as TE = Ribosome protected fragment reads/RNA-seq reads (Sidrauski et al., 2015)
Transcript length (kb)	length of the longest isoform of each transcript from Ensembl release 87
AU content (%)	Gene % AU content = 1-Gene % GC content, where Gene % GC content is provided by Ensembl release 87
SG-proximal?	CAP-seq defined SG-proximal RNAs in arsenite-stressed U-2 OS, (1 = yes, 0 = no)
SG-depleted?	CAP-seq defined SG-depleted RNAs in arsenite-stressed U-2 OS, (1 = yes, 0 = no)
