# Supplementary material for: Profiling stress-triggered RNA condensation with photocatalytic proximity labeling
Source: Research Square preprint supplement (doi:10.21203/rs.3.rs-2513504/v1), 2023-02-14
Supplement: Supplementary file 3 [file beff6cc69fb35d8964b9ef79.xlsx]

## Sheet:  A-TE & m6A sites
Gene_info V87		log2TE	m6A sites
geneID	geneType
ENSG00000000003	protein_coding	-0.359309	0
ENSG00000000005	protein_coding	#N/A	0
ENSG00000000419	protein_coding	1.0893	0
ENSG00000000457	protein_coding	-1.3396	2
ENSG00000000460	protein_coding	-0.371247	0
ENSG00000000938	protein_coding	#N/A	0
ENSG00000000971	protein_coding	#N/A	0
ENSG00000001036	protein_coding	-0.194324	0
ENSG00000001084	protein_coding	0.0470902	0
ENSG00000001167	protein_coding	0.329965	6
ENSG00000001460	protein_coding	0.609327	2
ENSG00000001461	protein_coding	-0.477838	1
ENSG00000001497	protein_coding	0.176754	0
ENSG00000001561	protein_coding	0.860434	1
ENSG00000001617	protein_coding	-1.60266	2
ENSG00000001626	protein_coding	#N/A	0
ENSG00000001629	protein_coding	-2.36492	4
ENSG00000001630	protein_coding	-0.29237	0
ENSG00000001631	protein_coding	-1.72756	0
ENSG00000002016	protein_coding	-0.927244	0
ENSG00000002330	protein_coding	0.678072	0
ENSG00000002549	protein_coding	-0.973832	0
ENSG00000002586	protein_coding	-0.0225867	0
ENSG00000002587	protein_coding	#N/A	0
ENSG00000002726	protein_coding	#N/A	0
ENSG00000002745	protein_coding	#N/A	0
ENSG00000002746	protein_coding	#N/A	0
ENSG00000002822	protein_coding	-1.20517	0
ENSG00000002834	protein_coding	2.60153	0
ENSG00000002919	protein_coding	-0.447083	0
ENSG00000002933	protein_coding	#N/A	0
ENSG00000003056	protein_coding	-0.0282026	0
ENSG00000003096	protein_coding	-0.46464	2
ENSG00000003137	protein_coding	#N/A	0
ENSG00000003147	protein_coding	-1.49228	0
ENSG00000003249	protein_coding	0.82415	4
ENSG00000003393	protein_coding	-1.58316	2
ENSG00000003400	protein_coding	#N/A	1
ENSG00000003402	protein_coding	-1.13894	1
ENSG00000003436	protein_coding	#N/A	0
ENSG00000003509	protein_coding	-0.593441	1
ENSG00000003756	protein_coding	-1.46949	0
ENSG00000003987	protein_coding	1.14568	0
ENSG00000003989	protein_coding	0.372841	1
ENSG00000004059	protein_coding	1.0171	0
ENSG00000004139	protein_coding	0.61891	2
ENSG00000004142	protein_coding	0.225077	3
ENSG00000004399	protein_coding	-0.0796172	1
ENSG00000004455	protein_coding	-0.22708	4
ENSG00000004468	protein_coding	#N/A	0
ENSG00000004478	protein_coding	0.110455	0
ENSG00000004487	protein_coding	-0.11218	0
ENSG00000004534	protein_coding	-2.67192	6
ENSG00000004660	protein_coding	-0.531581	4
ENSG00000004700	protein_coding	0.672188	0
ENSG00000004766	protein_coding	#N/A	1
ENSG00000004776	protein_coding	#N/A	0
ENSG00000004777	protein_coding	0.434403	0
ENSG00000004779	protein_coding	1.08789	0
ENSG00000004799	protein_coding	#N/A	0
ENSG00000004809	protein_coding	#N/A	0
ENSG00000004838	protein_coding	#N/A	0
ENSG00000004846	protein_coding	#N/A	0
ENSG00000004848	protein_coding	#N/A	0
ENSG00000004864	protein_coding	-0.199615	0
ENSG00000004866	protein_coding	-0.281644	0
ENSG00000004897	protein_coding	-0.0967954	0
ENSG00000004939	protein_coding	#N/A	0
ENSG00000004948	protein_coding	#N/A	0
ENSG00000004961	protein_coding	-1.41097	0
ENSG00000004975	protein_coding	0.298244	0
ENSG00000005001	protein_coding	#N/A	0
ENSG00000005007	protein_coding	0.45355	4
ENSG00000005020	protein_coding	1.1412	0
ENSG00000005022	protein_coding	0.487128	0
ENSG00000005059	protein_coding	#N/A	0
ENSG00000005073	protein_coding	1.58496	6
ENSG00000005075	protein_coding	1.47319	1
ENSG00000005100	protein_coding	0	3
ENSG00000005102	protein_coding	#N/A	0
ENSG00000005108	protein_coding	#N/A	0
ENSG00000005156	protein_coding	-0.147637	2
ENSG00000005175	protein_coding	-0.0512947	0
ENSG00000005187	protein_coding	0.475733	0
ENSG00000005189	protein_coding	#N/A	0
ENSG00000005194	protein_coding	0.0721899	0
ENSG00000005206	protein_coding	-0.741024	6
ENSG00000005238	protein_coding	#N/A	0
ENSG00000005243	protein_coding	#N/A	0
ENSG00000005249	protein_coding	0.926548	0
ENSG00000005302	protein_coding	-0.761276	0
ENSG00000005339	protein_coding	-0.733081	5
ENSG00000005379	protein_coding	#N/A	0
ENSG00000005381	protein_coding	#N/A	0
ENSG00000005421	protein_coding	#N/A	0
ENSG00000005436	protein_coding	-1.2728	0
ENSG00000005448	protein_coding	-0.22393	0
ENSG00000005469	protein_coding	-0.0590355	0
ENSG00000005471	protein_coding	#N/A	0
ENSG00000005483	protein_coding	-2.19004	1
ENSG00000005486	protein_coding	0.86287	0
ENSG00000005513	protein_coding	#N/A	1
ENSG00000005700	protein_coding	-0.500764	1
ENSG00000005801	protein_coding	-1.84299	2
ENSG00000005810	protein_coding	-3.27565	1
ENSG00000005812	protein_coding	-1.35867	3
ENSG00000005844	protein_coding	#N/A	0
ENSG00000005882	protein_coding	1.74366	0
ENSG00000005884	protein_coding	0.415037	2
ENSG00000005889	protein_coding	-2.33943	8
ENSG00000005893	protein_coding	0.811097	0
ENSG00000005961	protein_coding	#N/A	0
ENSG00000005981	protein_coding	#N/A	0
ENSG00000006007	protein_coding	-1.61675	2
ENSG00000006015	protein_coding	0.766741	0
ENSG00000006016	protein_coding	#N/A	0
ENSG00000006025	protein_coding	#N/A	0
ENSG00000006042	protein_coding	-0.123631	0
ENSG00000006047	protein_coding	#N/A	0
ENSG00000006059	protein_coding	#N/A	0
ENSG00000006062	protein_coding	-0.410788	0
ENSG00000006071	protein_coding	-2.04182	0
ENSG00000006116	protein_coding	#N/A	0
ENSG00000006118	protein_coding	-1.08523	3
ENSG00000006125	protein_coding	0.460897	0
ENSG00000006128	protein_coding	#N/A	0
ENSG00000006194	protein_coding	-1.95641	6
ENSG00000006210	protein_coding	#N/A	0
ENSG00000006282	protein_coding	-0.942572	0
ENSG00000006283	protein_coding	#N/A	0
ENSG00000006327	protein_coding	#N/A	0
ENSG00000006377	protein_coding	#N/A	1
ENSG00000006432	protein_coding	-2.97888	2
ENSG00000006451	protein_coding	0.786558	0
ENSG00000006453	protein_coding	0.405192	2
ENSG00000006459	protein_coding	#N/A	2
ENSG00000006468	protein_coding	#N/A	0
ENSG00000006530	protein_coding	-0.073451	0
ENSG00000006534	protein_coding	#N/A	0
ENSG00000006555	protein_coding	#N/A	0
ENSG00000006576	protein_coding	-0.86952	0
ENSG00000006606	protein_coding	#N/A	0
ENSG00000006607	protein_coding	-0.0467024	1
ENSG00000006611	protein_coding	#N/A	0
ENSG00000006625	protein_coding	0.236924	0
ENSG00000006634	protein_coding	-2.60033	2
ENSG00000006638	protein_coding	#N/A	0
ENSG00000006652	protein_coding	-1.6632	0
ENSG00000006659	protein_coding	#N/A	0
ENSG00000006695	protein_coding	-1.07587	0
ENSG00000006704	protein_coding	-0.706394	0
ENSG00000006712	protein_coding	1.23407	2
ENSG00000006715	protein_coding	-1.72389	2
ENSG00000006740	protein_coding	-1.14202	0
ENSG00000006744	protein_coding	-0.828857	3
ENSG00000006747	protein_coding	#N/A	0
ENSG00000006756	protein_coding	#N/A	0
ENSG00000006757	protein_coding	#NUM!	0
ENSG00000006788	protein_coding	#N/A	0
ENSG00000006831	protein_coding	0.396951	1
ENSG00000006837	protein_coding	#N/A	0
ENSG00000007001	protein_coding	#N/A	0
ENSG00000007038	protein_coding	#N/A	0
ENSG00000007047	protein_coding	0.232752	0
ENSG00000007062	protein_coding	#N/A	0
ENSG00000007080	protein_coding	0.930759	0
ENSG00000007129	protein_coding	#N/A	0
ENSG00000007168	protein_coding	0.134938	0
ENSG00000007171	protein_coding	1.03449	0
ENSG00000007174	protein_coding	#N/A	0
ENSG00000007202	protein_coding	-2.99302	5
ENSG00000007216	protein_coding	#N/A	0
ENSG00000007237	protein_coding	#N/A	0
ENSG00000007255	protein_coding	0.227069	0
ENSG00000007264	protein_coding	-2.61644	0
ENSG00000007306	protein_coding	#N/A	0
ENSG00000007312	protein_coding	#N/A	0
ENSG00000007314	protein_coding	#N/A	0
ENSG00000007341	protein_coding	-0.0819773	1
ENSG00000007350	protein_coding	#N/A	0
ENSG00000007372	protein_coding	-0.298015	1
ENSG00000007376	protein_coding	-0.598078	3
ENSG00000007384	protein_coding	1.09163	0
ENSG00000007392	protein_coding	-3	0
ENSG00000007402	protein_coding	-0.516398	0
ENSG00000007516	protein_coding	#N/A	1
ENSG00000007520	protein_coding	-0.527866	0
ENSG00000007541	protein_coding	-0.175294	3
ENSG00000007545	protein_coding	#N/A	4
ENSG00000007866	protein_coding	#N/A	0
ENSG00000007908	protein_coding	#N/A	0
ENSG00000007923	protein_coding	-0.632484	1
ENSG00000007933	protein_coding	#N/A	0
ENSG00000007944	protein_coding	-0.730539	2
ENSG00000007952	protein_coding	#N/A	0
ENSG00000007968	protein_coding	0.983559	2
ENSG00000008018	protein_coding	1.24506	0
ENSG00000008056	protein_coding	#N/A	0
ENSG00000008083	protein_coding	-0.872228	8
ENSG00000008086	protein_coding	-1.49668	1
ENSG00000008118	protein_coding	#N/A	0
ENSG00000008128	protein_coding	#N/A	0
ENSG00000008130	protein_coding	-1.04196	0
ENSG00000008196	protein_coding	#N/A	0
ENSG00000008197	protein_coding	#N/A	0
ENSG00000008226	protein_coding	#N/A	0
ENSG00000008256	protein_coding	-0.788024	2
ENSG00000008277	protein_coding	-1.94322	1
ENSG00000008282	protein_coding	2.05327	0
ENSG00000008283	protein_coding	0.741932	0
ENSG00000008294	protein_coding	-0.852488	0
ENSG00000008300	protein_coding	-2.83219	11
ENSG00000008311	protein_coding	-1.54165	0
ENSG00000008323	protein_coding	#N/A	0
ENSG00000008324	protein_coding	-0.157791	1
ENSG00000008382	protein_coding	-0.749677	0
ENSG00000008394	protein_coding	2.65914	0
ENSG00000008405	protein_coding	-1.24832	0
ENSG00000008438	protein_coding	#N/A	0
ENSG00000008441	protein_coding	1.36591	0
ENSG00000008513	protein_coding	-0.70044	2
ENSG00000008516	protein_coding	#N/A	0
ENSG00000008517	protein_coding	#N/A	0
ENSG00000008710	protein_coding	-3.24527	5
ENSG00000008735	protein_coding	0.973365	1
ENSG00000008838	protein_coding	-0.215003	1
ENSG00000008853	protein_coding	-0.268489	2
ENSG00000008869	protein_coding	-1.39323	0
ENSG00000008952	protein_coding	-0.462156	3
ENSG00000008988	protein_coding	-1.78862	0
ENSG00000009307	protein_coding	-1.68212	0
ENSG00000009335	protein_coding	-1.38721	1
ENSG00000009413	protein_coding	-3.48328	7
ENSG00000009694	protein_coding	-7.61839	2
ENSG00000009709	protein_coding	#N/A	0
ENSG00000009724	protein_coding	#N/A	0
ENSG00000009765	protein_coding	#N/A	0
ENSG00000009780	protein_coding	-1.42139	0
ENSG00000009790	protein_coding	#N/A	0
ENSG00000009830	protein_coding	-1.93832	1
ENSG00000009844	protein_coding	0.432546	0
ENSG00000009950	protein_coding	0.46158	0
ENSG00000009954	protein_coding	-1.3333	7
ENSG00000010017	protein_coding	0.22395	0
ENSG00000010030	protein_coding	#N/A	0
ENSG00000010072	protein_coding	-1.35752	0
ENSG00000010165	protein_coding	-0.769529	5
ENSG00000010219	protein_coding	0.201977	0
ENSG00000010244	protein_coding	0.462742	0
ENSG00000010256	protein_coding	-0.560935	0
ENSG00000010270	protein_coding	-1.25477	0
ENSG00000010278	protein_coding	3.20553	0
ENSG00000010282	protein_coding	#N/A	0
ENSG00000010292	protein_coding	0.02539	0
ENSG00000010295	protein_coding	-0.168754	0
ENSG00000010310	protein_coding	#N/A	0
ENSG00000010318	protein_coding	-4.05311	0
ENSG00000010319	protein_coding	-2.39232	0
ENSG00000010322	protein_coding	-1.22988	7
ENSG00000010327	protein_coding	#N/A	0
ENSG00000010361	protein_coding	-0.501634	0
ENSG00000010379	protein_coding	#N/A	0
ENSG00000010404	protein_coding	-3.86335	1
ENSG00000010438	protein_coding	#N/A	0
ENSG00000010539	protein_coding	0.180082	4
ENSG00000010610	protein_coding	#N/A	0
ENSG00000010626	protein_coding	-2.13245	0
ENSG00000010671	protein_coding	#N/A	0
ENSG00000010704	protein_coding	#N/A	0
ENSG00000010803	protein_coding	-1.75598	0
ENSG00000010810	protein_coding	-0.929881	0
ENSG00000010818	protein_coding	-0.89775	7
ENSG00000010932	protein_coding	#N/A	0
ENSG00000011007	protein_coding	-0.885238	7
ENSG00000011009	protein_coding	0.950363	0
ENSG00000011021	protein_coding	-1.98592	0
ENSG00000011028	protein_coding	0.522227	0
ENSG00000011052	protein_coding	1.03545	0
ENSG00000011083	protein_coding	#N/A	0
ENSG00000011105	protein_coding	2.31853	0
ENSG00000011114	protein_coding	-2.02337	8
ENSG00000011132	protein_coding	-0.927592	4
ENSG00000011143	protein_coding	-0.119961	0
ENSG00000011198	protein_coding	-1.36347	1
ENSG00000011201	protein_coding	#N/A	0
ENSG00000011243	protein_coding	-0.408646	0
ENSG00000011258	protein_coding	-1.32393	0
ENSG00000011260	protein_coding	-0.304855	1
ENSG00000011275	protein_coding	-1.53611	2
ENSG00000011295	protein_coding	-0.819121	0
ENSG00000011304	protein_coding	1.05663	0
ENSG00000011332	protein_coding	1.1006	0
ENSG00000011347	protein_coding	#N/A	0
ENSG00000011376	protein_coding	-2.34841	5
ENSG00000011405	protein_coding	-1.62875	4
ENSG00000011422	protein_coding	1.11136	0
ENSG00000011426	protein_coding	-0.669436	0
ENSG00000011451	protein_coding	0.557848	0
ENSG00000011454	protein_coding	-0.770947	2
ENSG00000011465	protein_coding	#N/A	0
ENSG00000011478	protein_coding	0.048726	1
ENSG00000011485	protein_coding	-0.0416191	0
ENSG00000011523	protein_coding	-0.709039	2
ENSG00000011566	protein_coding	-1.23017	0
ENSG00000011590	protein_coding	#N/A	0
ENSG00000011600	protein_coding	#N/A	0
ENSG00000011638	protein_coding	#N/A	0
ENSG00000011677	protein_coding	#N/A	0
ENSG00000012048	protein_coding	-1.83099	0
ENSG00000012061	protein_coding	-0.341161	2
ENSG00000012124	protein_coding	#N/A	0
ENSG00000012171	protein_coding	#N/A	0
ENSG00000012174	protein_coding	1.22981	0
ENSG00000012211	protein_coding	0.38048	0
ENSG00000012223	protein_coding	#N/A	0
ENSG00000012232	protein_coding	-0.700199	9
ENSG00000012504	protein_coding	#N/A	0
ENSG00000012660	protein_coding	1.5082	0
ENSG00000012779	protein_coding	#N/A	0
ENSG00000012817	protein_coding	#N/A	0
ENSG00000012822	protein_coding	0.162271	0
ENSG00000012963	protein_coding	0.52374	0
ENSG00000012983	protein_coding	-1.24428	0
ENSG00000013016	protein_coding	-0.798366	0
ENSG00000013275	protein_coding	1.46639	0
ENSG00000013288	protein_coding	-0.458909	0
ENSG00000013293	protein_coding	#N/A	0
ENSG00000013297	protein_coding	#N/A	0
ENSG00000013306	protein_coding	-1.03375	0
ENSG00000013364	protein_coding	#N/A	0
ENSG00000013374	protein_coding	0.869724	0
ENSG00000013375	protein_coding	0.817349	2
ENSG00000013392	protein_coding	0.652805	3
ENSG00000013441	protein_coding	-2.02389	0
ENSG00000013503	protein_coding	-0.691028	2
ENSG00000013523	protein_coding	-1.10178	1
ENSG00000013561	protein_coding	-0.676767	0
ENSG00000013563	protein_coding	-1.56857	0
ENSG00000013573	protein_coding	-1.31952	1
ENSG00000013583	protein_coding	1.87122	0
ENSG00000013588	protein_coding	#N/A	1
ENSG00000013619	protein_coding	#N/A	0
ENSG00000013725	protein_coding	#N/A	0
ENSG00000013810	protein_coding	0.230889	4
ENSG00000014123	protein_coding	-0.735082	0
ENSG00000014138	protein_coding	-0.579897	1
ENSG00000014164	protein_coding	0.531664	0
ENSG00000014216	protein_coding	1.58496	0
ENSG00000014257	protein_coding	#N/A	0
ENSG00000014641	protein_coding	0.0103947	0
ENSG00000014824	protein_coding	-1.90881	1
ENSG00000014914	protein_coding	#N/A	0
ENSG00000014919	protein_coding	0.828	1
ENSG00000015133	protein_coding	-0.296665	0
ENSG00000015153	protein_coding	0.97565	0
ENSG00000015171	protein_coding	-0.595532	0
ENSG00000015285	protein_coding	#N/A	0
ENSG00000015413	protein_coding	#N/A	0
ENSG00000015475	protein_coding	1.22882	0
ENSG00000015479	protein_coding	-0.603611	1
ENSG00000015520	protein_coding	#N/A	0
ENSG00000015532	protein_coding	-0.562936	3
ENSG00000015568	protein_coding	#N/A	0
ENSG00000015592	protein_coding	#N/A	0
ENSG00000015676	protein_coding	0.394244	5
ENSG00000016082	protein_coding	-0.885357	1
ENSG00000016391	protein_coding	-0.46445	5
ENSG00000016402	protein_coding	#N/A	0
ENSG00000016490	protein_coding	#N/A	0
ENSG00000016602	protein_coding	#N/A	0
ENSG00000016864	protein_coding	-1.50589	2
ENSG00000017260	protein_coding	-0.883267	0
ENSG00000017427	protein_coding	#N/A	0
ENSG00000017483	protein_coding	#N/A	0
ENSG00000017797	protein_coding	-1.52729	7
ENSG00000018189	protein_coding	-0.981384	1
ENSG00000018236	protein_coding	0.26748	0
ENSG00000018280	protein_coding	#N/A	0
ENSG00000018408	protein_coding	3.16551	0
ENSG00000018510	protein_coding	-0.355028	0
ENSG00000018610	protein_coding	-0.314717	0
ENSG00000018625	protein_coding	#N/A	0
ENSG00000018699	protein_coding	-1.08137	0
ENSG00000018869	protein_coding	-0.568843	0
ENSG00000019102	protein_coding	#N/A	0
ENSG00000019144	protein_coding	0.411497	1
ENSG00000019169	protein_coding	#N/A	0
ENSG00000019186	protein_coding	#N/A	0
ENSG00000019485	protein_coding	-1.953	0
ENSG00000019505	protein_coding	#N/A	0
ENSG00000019549	protein_coding	-4.24207	1
ENSG00000019582	protein_coding	#N/A	0
ENSG00000019991	protein_coding	#N/A	0
ENSG00000019995	protein_coding	-1.65198	6
ENSG00000020129	protein_coding	0.803618	1
ENSG00000020181	protein_coding	#N/A	0
ENSG00000020256	protein_coding	-0.0731477	10
ENSG00000020426	protein_coding	-0.819428	0
ENSG00000020577	protein_coding	-0.216133	2
ENSG00000020633	protein_coding	#N/A	0
ENSG00000020922	protein_coding	#N/A	0
ENSG00000021300	protein_coding	#N/A	0
ENSG00000021355	protein_coding	1.53542	0
ENSG00000021461	protein_coding	#N/A	0
ENSG00000021488	protein_coding	#N/A	0
ENSG00000021574	protein_coding	-1.20494	0
ENSG00000021645	protein_coding	-1.01421	4
ENSG00000021762	protein_coding	-0.42711	0
ENSG00000021776	protein_coding	-0.50265	0
ENSG00000021826	protein_coding	-3.5424	0
ENSG00000021852	protein_coding	#N/A	0
ENSG00000022267	protein_coding	1.87705	0
ENSG00000022277	protein_coding	0.333601	0
ENSG00000022355	protein_coding	#N/A	0
ENSG00000022556	protein_coding	#N/A	0
ENSG00000022567	protein_coding	-1	2
ENSG00000022840	protein_coding	-1.82706	0
ENSG00000022976	protein_coding	-1.2708	5
ENSG00000023041	protein_coding	-2.1352	0
ENSG00000023171	protein_coding	-0.0112273	0
ENSG00000023191	protein_coding	0.775313	0
ENSG00000023228	protein_coding	0.342934	0
ENSG00000023287	protein_coding	-2.79642	4
ENSG00000023318	protein_coding	0.575748	0
ENSG00000023330	protein_coding	-0.751538	0
ENSG00000023445	protein_coding	#N/A	0
ENSG00000023516	protein_coding	-1.27744	3
ENSG00000023572	protein_coding	-0.53842	0
ENSG00000023608	protein_coding	0.169925	1
ENSG00000023697	protein_coding	0.307044	0
ENSG00000023734	protein_coding	0.701809	0
ENSG00000023839	protein_coding	-4.21723	0
ENSG00000023892	protein_coding	#N/A	0
ENSG00000023902	protein_coding	-1.45873	5
ENSG00000023909	protein_coding	0.466332	0
ENSG00000024048	protein_coding	-0.661368	0
ENSG00000024422	protein_coding	#N/A	0
ENSG00000024526	protein_coding	-1.43143	0
ENSG00000024862	protein_coding	0.330149	0
ENSG00000025039	protein_coding	-1.0778	0
ENSG00000025156	protein_coding	-0.145736	0
ENSG00000025293	protein_coding	-1.97454	3
ENSG00000025423	protein_coding	-0.522678	0
ENSG00000025434	protein_coding	-1.09592	1
ENSG00000025708	protein_coding	#N/A	0
ENSG00000025770	protein_coding	-0.761203	3
ENSG00000025772	protein_coding	0.409294	0
ENSG00000025796	protein_coding	0.522027	0
ENSG00000025800	protein_coding	-0.000753366	4
ENSG00000026025	protein_coding	1.08198	0
ENSG00000026036	protein_coding	#N/A	0
ENSG00000026103	protein_coding	1.5776	0
ENSG00000026297	protein_coding	-0.171697	0
ENSG00000026508	protein_coding	#N/A	0
ENSG00000026559	protein_coding	-0.909585	2
ENSG00000026652	protein_coding	-0.453572	2
ENSG00000026751	protein_coding	#N/A	0
ENSG00000026950	protein_coding	-0.691314	1
ENSG00000027001	protein_coding	-0.210968	0
ENSG00000027075	protein_coding	1.19482	0
ENSG00000027644	protein_coding	#N/A	0
ENSG00000027697	protein_coding	-0.943473	0
ENSG00000027847	protein_coding	-0.764711	2
ENSG00000027869	protein_coding	#N/A	0
ENSG00000028116	protein_coding	-1.22401	0
ENSG00000028137	protein_coding	#N/A	0
ENSG00000028203	protein_coding	-1.02716	2
ENSG00000028277	protein_coding	#N/A	0
ENSG00000028310	protein_coding	-1.45241	2
ENSG00000028528	protein_coding	0.193344	0
ENSG00000028839	protein_coding	-0.0912805	0
ENSG00000029153	protein_coding	-3.23861	0
ENSG00000029363	protein_coding	-1.13906	1
ENSG00000029364	protein_coding	-0.515192	3
ENSG00000029534	protein_coding	-1.46755	0
ENSG00000029559	protein_coding	#N/A	0
ENSG00000029639	protein_coding	-1.7702	1
ENSG00000029725	protein_coding	-1.465	7
ENSG00000029993	protein_coding	-0.842804	0
ENSG00000030066	protein_coding	-1.06595	1
ENSG00000030110	protein_coding	0.759809	0
ENSG00000030304	protein_coding	#N/A	0
ENSG00000030419	protein_coding	-0.63743	2
ENSG00000030582	protein_coding	1.01544	0
ENSG00000031003	protein_coding	-4.26053	1
ENSG00000031081	protein_coding	-0.851677	0
ENSG00000031691	protein_coding	0.0425047	0
ENSG00000031698	protein_coding	-0.436837	5
ENSG00000031823	protein_coding	0.669402	2
ENSG00000032219	protein_coding	-1.46695	2
ENSG00000032389	protein_coding	-0.755935	0
ENSG00000032444	protein_coding	-0.55793	0
ENSG00000032742	protein_coding	0.0198539	0
ENSG00000033011	protein_coding	-0.327575	1
ENSG00000033030	protein_coding	-0.697575	4
ENSG00000033050	protein_coding	-0.63062	3
ENSG00000033100	protein_coding	-0.726352	8
ENSG00000033122	protein_coding	#N/A	0
ENSG00000033170	protein_coding	-2.12474	4
ENSG00000033178	protein_coding	-0.564175	3
ENSG00000033327	protein_coding	#N/A	0
ENSG00000033627	protein_coding	-0.38267	0
ENSG00000033800	protein_coding	0.117866	3
ENSG00000033867	protein_coding	-1.2511	0
ENSG00000034053	protein_coding	-0.812721	4
ENSG00000034152	protein_coding	-0.155178	0
ENSG00000034239	protein_coding	#N/A	0
ENSG00000034510	protein_coding	3.07039	0
ENSG00000034533	protein_coding	-0.429219	1
ENSG00000034677	protein_coding	-1.54635	3
ENSG00000034693	protein_coding	-0.338416	0
ENSG00000034713	protein_coding	0.98397	0
ENSG00000034971	protein_coding	#N/A	0
ENSG00000035115	protein_coding	-1.79837	2
ENSG00000035141	protein_coding	0.766624	0
ENSG00000035403	protein_coding	0.0327479	0
ENSG00000035499	protein_coding	-0.965366	0
ENSG00000035664	protein_coding	#N/A	0
ENSG00000035681	protein_coding	-2.5417	0
ENSG00000035687	protein_coding	-1.18166	0
ENSG00000035720	protein_coding	#N/A	0
ENSG00000035862	protein_coding	1.73073	0
ENSG00000035928	protein_coding	-1.09637	2
ENSG00000036054	protein_coding	-0.735434	0
ENSG00000036257	protein_coding	-0.082619	0
ENSG00000036448	protein_coding	-0.0455147	1
ENSG00000036473	protein_coding	#N/A	0
ENSG00000036530	protein_coding	#N/A	0
ENSG00000036549	protein_coding	-3.40892	4
ENSG00000036565	protein_coding	#N/A	0
ENSG00000036672	protein_coding	-0.141661	0
ENSG00000036828	protein_coding	#N/A	0
ENSG00000037042	protein_coding	0.367262	0
ENSG00000037241	protein_coding	0.711955	0
ENSG00000037280	protein_coding	-0.441649	5
ENSG00000037474	protein_coding	-0.102952	3
ENSG00000037637	protein_coding	-0.516158	6
ENSG00000037749	protein_coding	-0.181055	5
ENSG00000037757	protein_coding	-0.18303	1
ENSG00000037897	protein_coding	0.922939	3
ENSG00000037965	protein_coding	1.40484	1
ENSG00000038002	protein_coding	0.0995357	0
ENSG00000038210	protein_coding	-1.13693	0
ENSG00000038219	protein_coding	-1.65764	14
ENSG00000038274	protein_coding	0.538023	0
ENSG00000038295	protein_coding	-4.52356	0
ENSG00000038358	protein_coding	0.0684676	0
ENSG00000038382	protein_coding	-2.08479	6
ENSG00000038427	protein_coding	-0.476951	14
ENSG00000038532	protein_coding	-1.79989	4
ENSG00000038945	protein_coding	#N/A	0
ENSG00000039068	protein_coding	#N/A	1
ENSG00000039123	protein_coding	-0.747989	1
ENSG00000039139	protein_coding	#N/A	0
ENSG00000039319	protein_coding	-0.989229	2
ENSG00000039523	protein_coding	1.18107	0
ENSG00000039537	protein_coding	#N/A	0
ENSG00000039560	protein_coding	0.482468	2
ENSG00000039600	protein_coding	#N/A	0
ENSG00000039650	protein_coding	-1.32079	0
ENSG00000039987	protein_coding	#N/A	0
ENSG00000040199	protein_coding	-1.87129	4
ENSG00000040275	protein_coding	-0.933149	0
ENSG00000040341	protein_coding	-0.656847	0
ENSG00000040487	protein_coding	1.2555	5
ENSG00000040531	protein_coding	0.445626	3
ENSG00000040608	protein_coding	#N/A	3
ENSG00000040633	protein_coding	-0.336267	5
ENSG00000040731	protein_coding	#N/A	0
ENSG00000040933	protein_coding	-1.64316	2
ENSG00000041353	protein_coding	#N/A	0
ENSG00000041357	protein_coding	-0.0577812	0
ENSG00000041515	protein_coding	#N/A	0
ENSG00000041802	protein_coding	-0.612802	6
ENSG00000041880	protein_coding	-3.3837	0
ENSG00000041982	protein_coding	#N/A	0
ENSG00000041988	protein_coding	0.372201	3
ENSG00000042062	protein_coding	#N/A	0
ENSG00000042088	protein_coding	-0.940558	2
ENSG00000042286	protein_coding	2.60459	0
ENSG00000042304	protein_coding	#N/A	0
ENSG00000042317	protein_coding	-1.43244	0
ENSG00000042429	protein_coding	-0.359717	0
ENSG00000042445	protein_coding	-0.357295	0
ENSG00000042493	protein_coding	-1.86507	0
ENSG00000042753	protein_coding	0.324883	0
ENSG00000042781	protein_coding	#N/A	0
ENSG00000042813	protein_coding	#N/A	0
ENSG00000042832	protein_coding	#N/A	0
ENSG00000042980	protein_coding	#N/A	0
ENSG00000043039	protein_coding	#N/A	0
ENSG00000043093	protein_coding	0.203872	0
ENSG00000043143	protein_coding	#N/A	1
ENSG00000043355	protein_coding	1.84415	3
ENSG00000043462	protein_coding	#N/A	0
ENSG00000043514	protein_coding	-0.537421	0
ENSG00000043591	protein_coding	#N/A	0
ENSG00000044012	protein_coding	#N/A	0
ENSG00000044090	protein_coding	0.0358363	1
ENSG00000044115	protein_coding	0.91468	0
ENSG00000044446	protein_coding	-0.661483	0
ENSG00000044459	protein_coding	-1.08918	0
ENSG00000044524	protein_coding	-0.785713	2
ENSG00000044574	protein_coding	0.428601	2
ENSG00000046604	protein_coding	0.0530652	1
ENSG00000046647	protein_coding	1.57898	1
ENSG00000046651	protein_coding	-1.82562	1
ENSG00000046653	protein_coding	1.71921	0
ENSG00000046774	protein_coding	#N/A	0
ENSG00000046889	protein_coding	-0.406475	0
ENSG00000047056	protein_coding	-0.441435	0
ENSG00000047188	protein_coding	-0.543945	1
ENSG00000047230	protein_coding	-0.730695	0
ENSG00000047249	protein_coding	-0.00306793	0
ENSG00000047315	protein_coding	-0.754471	0
ENSG00000047346	protein_coding	-0.49445	1
ENSG00000047365	protein_coding	-1.49679	3
ENSG00000047410	protein_coding	-2.20807	0
ENSG00000047457	protein_coding	#N/A	0
ENSG00000047578	protein_coding	-1.76799	3
ENSG00000047579	protein_coding	1.06723	1
ENSG00000047597	protein_coding	0.173648	0
ENSG00000047617	protein_coding	#N/A	0
ENSG00000047621	protein_coding	0.010656	0
ENSG00000047634	protein_coding	0.924808	0
ENSG00000047644	protein_coding	#N/A	0
ENSG00000047648	protein_coding	#N/A	0
ENSG00000047662	protein_coding	#N/A	0
ENSG00000047849	protein_coding	0.158266	6
ENSG00000047932	protein_coding	#N/A	0
ENSG00000047936	protein_coding	#N/A	0
ENSG00000048028	protein_coding	-1.5552	0
ENSG00000048052	protein_coding	#N/A	0
ENSG00000048140	protein_coding	-2.26388	2
ENSG00000048162	protein_coding	-0.701483	0
ENSG00000048342	protein_coding	-1.20286	0
ENSG00000048392	protein_coding	0.288554	0
ENSG00000048405	protein_coding	-0.720361	5
ENSG00000048462	protein_coding	#N/A	0
ENSG00000048471	protein_coding	-2.795	1
ENSG00000048540	protein_coding	#N/A	0
ENSG00000048544	protein_coding	1.132	0
ENSG00000048545	protein_coding	#N/A	0
ENSG00000048649	protein_coding	-1.11788	3
ENSG00000048707	protein_coding	-2.45783	6
ENSG00000048740	protein_coding	2.59413	0
ENSG00000048828	protein_coding	-1.13284	0
ENSG00000048991	protein_coding	-2.10529	0
ENSG00000049089	protein_coding	#N/A	0
ENSG00000049130	protein_coding	0.252643	0
ENSG00000049167	protein_coding	-2.28011	0
ENSG00000049192	protein_coding	-3.45943	0
ENSG00000049239	protein_coding	-0.0449124	7
ENSG00000049245	protein_coding	0.751877	3
ENSG00000049246	protein_coding	-0.485427	0
ENSG00000049247	protein_coding	#N/A	0
ENSG00000049249	protein_coding	#N/A	0
ENSG00000049283	protein_coding	#N/A	0
ENSG00000049323	protein_coding	-0.360128	0
ENSG00000049449	protein_coding	-0.44679	1
ENSG00000049540	protein_coding	#N/A	0
ENSG00000049541	protein_coding	-0.145061	1
ENSG00000049618	protein_coding	-1.23163	9
ENSG00000049656	protein_coding	-0.966924	2
ENSG00000049759	protein_coding	1.10253	0
ENSG00000049768	protein_coding	#N/A	0
ENSG00000049769	protein_coding	-0.683143	0
ENSG00000049860	protein_coding	-0.608809	0
ENSG00000049883	protein_coding	-0.674759	0
ENSG00000050030	protein_coding	-5.70044	0
ENSG00000050130	protein_coding	0.0550876	0
ENSG00000050165	protein_coding	#N/A	0
ENSG00000050327	protein_coding	#N/A	0
ENSG00000050344	protein_coding	0.631727	3
ENSG00000050393	protein_coding	-0.667991	0
ENSG00000050405	protein_coding	1.32256	4
ENSG00000050426	protein_coding	0.263485	0
ENSG00000050438	protein_coding	-0.742504	0
ENSG00000050555	protein_coding	1.47846	0
ENSG00000050628	protein_coding	#N/A	0
ENSG00000050730	protein_coding	#N/A	0
ENSG00000050748	protein_coding	-0.558636	0
ENSG00000050767	protein_coding	#N/A	0
ENSG00000050820	protein_coding	0.0429466	6
ENSG00000051009	protein_coding	-1.60716	3
ENSG00000051108	protein_coding	0.117133	1
ENSG00000051128	protein_coding	0.0749621	0
ENSG00000051180	protein_coding	0.456434	0
ENSG00000051341	protein_coding	-3.09215	2
ENSG00000051382	protein_coding	-1.70334	1
ENSG00000051523	protein_coding	1.2178	1
ENSG00000051596	protein_coding	-0.53716	0
ENSG00000051620	protein_coding	-0.0502586	0
ENSG00000051825	protein_coding	-2.82526	1
ENSG00000052126	protein_coding	-0.256865	0
ENSG00000052344	protein_coding	#N/A	0
ENSG00000052723	protein_coding	-0.7398	1
ENSG00000052749	protein_coding	-0.0370442	2
ENSG00000052795	protein_coding	-1.70695	9
ENSG00000052802	protein_coding	0.442737	1
ENSG00000052841	protein_coding	-1.66881	0
ENSG00000052850	protein_coding	-0.0824622	2
ENSG00000053108	protein_coding	#N/A	0
ENSG00000053254	protein_coding	-1.36257	7
ENSG00000053328	protein_coding	#N/A	0
ENSG00000053371	protein_coding	0.835043	0
ENSG00000053372	protein_coding	0.448062	2
ENSG00000053438	protein_coding	#N/A	0
ENSG00000053501	protein_coding	0.318682	0
ENSG00000053524	protein_coding	#N/A	0
ENSG00000053702	protein_coding	#N/A	0
ENSG00000053747	protein_coding	-2.48409	0
ENSG00000053770	protein_coding	-1.56694	2
ENSG00000053900	protein_coding	-0.597195	0
ENSG00000053918	protein_coding	#N/A	0
ENSG00000054116	protein_coding	0.65138	2
ENSG00000054118	protein_coding	-0.589543	7
ENSG00000054148	protein_coding	1.22184	0
ENSG00000054179	protein_coding	#N/A	0
ENSG00000054219	protein_coding	#N/A	0
ENSG00000054267	protein_coding	-1.90371	4
ENSG00000054277	protein_coding	-0.650416	1
ENSG00000054282	protein_coding	-2.0424	0
ENSG00000054356	protein_coding	#N/A	0
ENSG00000054392	protein_coding	-0.408806	0
ENSG00000054523	protein_coding	-0.642972	9
ENSG00000054598	protein_coding	1.7178	5
ENSG00000054611	protein_coding	-0.107149	0
ENSG00000054654	protein_coding	-2.61248	5
ENSG00000054690	protein_coding	-1.40871	1
ENSG00000054793	protein_coding	-0.441296	4
ENSG00000054796	protein_coding	#N/A	0
ENSG00000054803	protein_coding	#N/A	0
ENSG00000054938	protein_coding	#N/A	0
ENSG00000054965	protein_coding	2.79099	0
ENSG00000054967	protein_coding	-0.727474	1
ENSG00000054983	protein_coding	0.544321	0
ENSG00000055044	protein_coding	-1.31632	0
ENSG00000055070	protein_coding	0.147479	2
ENSG00000055118	protein_coding	#N/A	0
ENSG00000055130	protein_coding	-0.6344	4
ENSG00000055147	protein_coding	-0.201169	0
ENSG00000055163	protein_coding	0.673292	2
ENSG00000055208	protein_coding	-0.0269951	4
ENSG00000055211	protein_coding	-0.481365	1
ENSG00000055332	protein_coding	0.250207	0
ENSG00000055483	protein_coding	-1.02683	5
ENSG00000055609	protein_coding	-2.32116	13
ENSG00000055732	protein_coding	0.143814	0
ENSG00000055813	protein_coding	#N/A	0
ENSG00000055917	protein_coding	-1.27281	0
ENSG00000055950	protein_coding	2.26373	1
ENSG00000055955	protein_coding	-4.88264	0
ENSG00000055957	protein_coding	#N/A	0
ENSG00000056050	protein_coding	#N/A	0
ENSG00000056097	protein_coding	-0.305348	0
ENSG00000056277	protein_coding	-1.06274	0
ENSG00000056291	protein_coding	#N/A	0
ENSG00000056487	protein_coding	#N/A	0
ENSG00000056558	protein_coding	#N/A	2
ENSG00000056586	protein_coding	-2.69006	1
ENSG00000056736	protein_coding	-1.19199	2
ENSG00000056972	protein_coding	0.910297	1
ENSG00000056998	protein_coding	-7.92481	2
ENSG00000057019	protein_coding	-1.71995	0
ENSG00000057149	protein_coding	#N/A	0
ENSG00000057252	protein_coding	-0.203909	1
ENSG00000057294	protein_coding	1.35333	0
ENSG00000057468	protein_coding	#NUM!	0
ENSG00000057593	protein_coding	#N/A	0
ENSG00000057608	protein_coding	0.56308	0
ENSG00000057657	protein_coding	#N/A	0
ENSG00000057663	protein_coding	-0.640235	3
ENSG00000057704	protein_coding	#N/A	2
ENSG00000057757	protein_coding	0.864918	0
ENSG00000057935	protein_coding	0.512689	0
ENSG00000058056	protein_coding	0.107098	0
ENSG00000058063	protein_coding	-1.08482	0
ENSG00000058085	protein_coding	#N/A	0
ENSG00000058091	protein_coding	-0.910601	0
ENSG00000058262	protein_coding	1.32554	7
ENSG00000058272	protein_coding	-0.144412	0
ENSG00000058335	protein_coding	#N/A	0
ENSG00000058404	protein_coding	#N/A	0
ENSG00000058453	protein_coding	-0.94669	0
ENSG00000058600	protein_coding	-2.00763	4
ENSG00000058668	protein_coding	-2.74129	2
ENSG00000058673	protein_coding	-2.15845	3
ENSG00000058729	protein_coding	-0.232255	2
ENSG00000058799	protein_coding	0.38405	0
ENSG00000058804	protein_coding	-0.290393	1
ENSG00000058866	protein_coding	#N/A	0
ENSG00000059122	protein_coding	-1.14155	4
ENSG00000059145	protein_coding	0.379087	2
ENSG00000059377	protein_coding	#N/A	0
ENSG00000059378	protein_coding	#N/A	0
ENSG00000059573	protein_coding	-1.14882	0
ENSG00000059588	protein_coding	-2.46377	0
ENSG00000059691	protein_coding	#N/A	0
ENSG00000059728	protein_coding	1.18982	1
ENSG00000059758	protein_coding	0.354155	0
ENSG00000059769	protein_coding	-2.13313	2
ENSG00000059804	protein_coding	#N/A	0
ENSG00000059915	protein_coding	#N/A	0
ENSG00000060069	protein_coding	-0.16135	6
ENSG00000060138	protein_coding	0.440212	0
ENSG00000060140	protein_coding	#N/A	0
ENSG00000060237	protein_coding	-0.654151	7
ENSG00000060339	protein_coding	-1.10387	0
ENSG00000060491	protein_coding	0.0748614	5
ENSG00000060558	protein_coding	#N/A	0
ENSG00000060566	protein_coding	#N/A	0
ENSG00000060642	protein_coding	-0.878321	0
ENSG00000060656	protein_coding	-1.94408	0
ENSG00000060688	protein_coding	-2.54674	0
ENSG00000060709	protein_coding	#N/A	0
ENSG00000060718	protein_coding	#N/A	0
ENSG00000060749	protein_coding	-2.05813	5
ENSG00000060762	protein_coding	-0.329622	0
ENSG00000060971	protein_coding	0.189677	0
ENSG00000060982	protein_coding	0.709634	0
ENSG00000061273	protein_coding	1.3168	0
ENSG00000061337	protein_coding	#N/A	0
ENSG00000061455	protein_coding	0.892144	1
ENSG00000061492	protein_coding	#N/A	0
ENSG00000061656	protein_coding	#N/A	0
ENSG00000061676	protein_coding	-0.902221	0
ENSG00000061794	protein_coding	0.695598	0
ENSG00000061918	protein_coding	1.41741	0
ENSG00000061936	protein_coding	-0.528366	0
ENSG00000061938	protein_coding	-1.66626	2
ENSG00000061987	protein_coding	-0.565029	1
ENSG00000062038	protein_coding	#N/A	0
ENSG00000062096	protein_coding	#N/A	0
ENSG00000062194	protein_coding	-2.62692	4
ENSG00000062282	protein_coding	#N/A	0
ENSG00000062370	protein_coding	#N/A	0
ENSG00000062485	protein_coding	1.16814	0
ENSG00000062524	protein_coding	#N/A	0
ENSG00000062582	protein_coding	0.0976711	0
ENSG00000062598	protein_coding	0.0945379	2
ENSG00000062650	protein_coding	#N/A	6
ENSG00000062716	protein_coding	0.440781	0
ENSG00000062725	protein_coding	-0.0951357	0
ENSG00000062822	protein_coding	-0.718454	0
ENSG00000063015	protein_coding	#N/A	0
ENSG00000063046	protein_coding	-1.64732	0
ENSG00000063127	protein_coding	#N/A	0
ENSG00000063169	protein_coding	0.407	0
ENSG00000063176	protein_coding	-0.311708	1
ENSG00000063177	protein_coding	-0.417023	0
ENSG00000063180	protein_coding	-0.941897	0
ENSG00000063241	protein_coding	-0.0849603	2
ENSG00000063244	protein_coding	0.366339	3
ENSG00000063245	protein_coding	0.285732	0
ENSG00000063322	protein_coding	3.09207	2
ENSG00000063438	protein_coding	-3.52878	7
ENSG00000063515	protein_coding	#N/A	0
ENSG00000063587	protein_coding	-0.34825	13
ENSG00000063601	protein_coding	-0.967316	2
ENSG00000063660	protein_coding	0.50772	1
ENSG00000063761	protein_coding	-0.684843	0
ENSG00000063854	protein_coding	0.409916	0
ENSG00000063978	protein_coding	-0.285561	1
ENSG00000064012	protein_coding	2.22882	0
ENSG00000064042	protein_coding	-0.284839	0
ENSG00000064102	protein_coding	-1.11349	0
ENSG00000064115	protein_coding	-0.720937	1
ENSG00000064195	protein_coding	#N/A	0
ENSG00000064199	protein_coding	-0.196191	0
ENSG00000064201	protein_coding	#N/A	0
ENSG00000064205	protein_coding	#N/A	0
ENSG00000064218	protein_coding	#N/A	0
ENSG00000064225	protein_coding	-1.36751	0
ENSG00000064270	protein_coding	#N/A	0
ENSG00000064300	protein_coding	#N/A	0
ENSG00000064309	protein_coding	-1.69119	2
ENSG00000064313	protein_coding	-1.67001	2
ENSG00000064393	protein_coding	-0.698421	4
ENSG00000064419	protein_coding	-0.563071	0
ENSG00000064489	protein_coding	#N/A	0
ENSG00000064490	protein_coding	-0.277825	0
ENSG00000064545	protein_coding	0.0649073	0
ENSG00000064547	protein_coding	#N/A	0
ENSG00000064601	protein_coding	0.561084	0
ENSG00000064607	protein_coding	-1.3965	6
ENSG00000064651	protein_coding	0.201869	1
ENSG00000064652	protein_coding	0.205749	0
ENSG00000064655	protein_coding	2	0
ENSG00000064666	protein_coding	2.34956	0
ENSG00000064687	protein_coding	-1.38622	1
ENSG00000064692	protein_coding	#N/A	0
ENSG00000064703	protein_coding	-0.408513	5
ENSG00000064726	protein_coding	-1.04353	0
ENSG00000064763	protein_coding	0.364852	0
ENSG00000064787	protein_coding	#N/A	0
ENSG00000064835	protein_coding	#N/A	0
ENSG00000064886	protein_coding	#N/A	0
ENSG00000064932	protein_coding	-0.82103	0
ENSG00000064933	protein_coding	-1.27713	1
ENSG00000064961	protein_coding	-1.93411	0
ENSG00000064989	protein_coding	#N/A	0
ENSG00000064995	protein_coding	-0.521079	2
ENSG00000064999	protein_coding	0.0393487	2
ENSG00000065000	protein_coding	0.104471	1
ENSG00000065029	protein_coding	-1.17783	1
ENSG00000065054	protein_coding	0.782971	2
ENSG00000065057	protein_coding	-0.860764	2
ENSG00000065060	protein_coding	-1.12356	6
ENSG00000065135	protein_coding	0.421903	2
ENSG00000065150	protein_coding	-0.915041	1
ENSG00000065154	protein_coding	0.854224	0
ENSG00000065183	protein_coding	-0.849648	1
ENSG00000065243	protein_coding	-0.788671	2
ENSG00000065268	protein_coding	1.5652	0
ENSG00000065308	protein_coding	0.481623	2
ENSG00000065320	protein_coding	1.993	4
ENSG00000065325	protein_coding	#N/A	0
ENSG00000065328	protein_coding	-0.768651	2
ENSG00000065357	protein_coding	-0.0976108	0
ENSG00000065361	protein_coding	#N/A	0
ENSG00000065371	protein_coding	#N/A	0
ENSG00000065413	protein_coding	-0.52402	0
ENSG00000065427	protein_coding	-0.85876	0
ENSG00000065457	protein_coding	-2.21009	3
ENSG00000065485	protein_coding	-1.41134	0
ENSG00000065491	protein_coding	-0.475128	0
ENSG00000065518	protein_coding	0.957222	0
ENSG00000065526	protein_coding	-2.84984	32
ENSG00000065534	protein_coding	-2.00705	0
ENSG00000065548	protein_coding	-1.26527	1
ENSG00000065559	protein_coding	-0.73441	2
ENSG00000065600	protein_coding	-1.1527	1
ENSG00000065609	protein_coding	#N/A	0
ENSG00000065613	protein_coding	-0.725978	1
ENSG00000065615	protein_coding	-0.545639	0
ENSG00000065618	protein_coding	#N/A	0
ENSG00000065621	protein_coding	#N/A	0
ENSG00000065665	protein_coding	0.423366	0
ENSG00000065675	protein_coding	0.350497	1
ENSG00000065717	protein_coding	#N/A	0
ENSG00000065802	protein_coding	-0.707298	1
ENSG00000065809	protein_coding	1.02528	2
ENSG00000065833	protein_coding	1.60629	0
ENSG00000065882	protein_coding	-0.0755071	1
ENSG00000065883	protein_coding	-1.92112	11
ENSG00000065911	protein_coding	-0.88694	0
ENSG00000065923	protein_coding	0.146334	0
ENSG00000065970	protein_coding	0.623437	0
ENSG00000065978	protein_coding	-0.727413	1
ENSG00000065989	protein_coding	-0.420332	1
ENSG00000066027	protein_coding	-1.89359	1
ENSG00000066032	protein_coding	#N/A	0
ENSG00000066044	protein_coding	1.30709	0
ENSG00000066056	protein_coding	#N/A	0
ENSG00000066084	protein_coding	-0.653786	0
ENSG00000066117	protein_coding	0.068729	0
ENSG00000066135	protein_coding	-0.693314	2
ENSG00000066136	protein_coding	1.21689	0
ENSG00000066185	protein_coding	#N/A	0
ENSG00000066230	protein_coding	#N/A	7
ENSG00000066248	protein_coding	1.2205	0
ENSG00000066279	protein_coding	-2.63759	1
ENSG00000066294	protein_coding	#N/A	0
ENSG00000066322	protein_coding	1.74608	1
ENSG00000066336	protein_coding	#N/A	0
ENSG00000066379	protein_coding	-0.0873197	0
ENSG00000066382	protein_coding	#N/A	0
ENSG00000066405	protein_coding	#N/A	4
ENSG00000066422	protein_coding	-1.6299	6
ENSG00000066427	protein_coding	0.386701	0
ENSG00000066455	protein_coding	-0.536259	3
ENSG00000066468	protein_coding	-1.36551	0
ENSG00000066557	protein_coding	-0.534367	1
ENSG00000066583	protein_coding	0.703138	1
ENSG00000066629	protein_coding	0.0032203	0
ENSG00000066651	protein_coding	-1.80288	0
ENSG00000066654	protein_coding	-1.03605	4
ENSG00000066697	protein_coding	#N/A	2
ENSG00000066735	protein_coding	-1.0126	7
ENSG00000066739	protein_coding	-0.751597	2
ENSG00000066777	protein_coding	-1.50669	0
ENSG00000066813	protein_coding	#N/A	0
ENSG00000066827	protein_coding	-1.71874	2
ENSG00000066855	protein_coding	-1.32814	0
ENSG00000066923	protein_coding	-0.731183	0
ENSG00000066926	protein_coding	0.573056	0
ENSG00000066933	protein_coding	-2.8108	9
ENSG00000067048	protein_coding	0.201345	0
ENSG00000067057	protein_coding	2.3316	0
ENSG00000067064	protein_coding	0.330438	0
ENSG00000067066	protein_coding	#N/A	0
ENSG00000067082	protein_coding	0.860348	3
ENSG00000067113	protein_coding	#N/A	0
ENSG00000067141	protein_coding	0.156663	2
ENSG00000067167	protein_coding	-0.513866	0
ENSG00000067177	protein_coding	-0.653436	1
ENSG00000067182	protein_coding	0.795461	0
ENSG00000067191	protein_coding	#N/A	0
ENSG00000067208	protein_coding	-1.71985	2
ENSG00000067221	protein_coding	0.277534	0
ENSG00000067225	protein_coding	-1.10401	0
ENSG00000067248	protein_coding	-1.39606	2
ENSG00000067334	protein_coding	-2.0002	0
ENSG00000067365	protein_coding	-2.76657	1
ENSG00000067369	protein_coding	-0.714907	7
ENSG00000067445	protein_coding	-0.615465	5
ENSG00000067533	protein_coding	-1.08406	1
ENSG00000067560	protein_coding	-0.312104	0
ENSG00000067596	protein_coding	-0.665115	3
ENSG00000067606	protein_coding	-0.365898	2
ENSG00000067646	protein_coding	0.0253111	0
ENSG00000067704	protein_coding	-2.47688	0
ENSG00000067715	protein_coding	0.192645	0
ENSG00000067798	protein_coding	#N/A	0
ENSG00000067829	protein_coding	0.522625	0
ENSG00000067836	protein_coding	-0.169925	0
ENSG00000067840	protein_coding	-0.934112	1
ENSG00000067842	protein_coding	#N/A	0
ENSG00000067900	protein_coding	-1.46413	3
ENSG00000067955	protein_coding	0.660428	0
ENSG00000067992	protein_coding	0.798591	0
ENSG00000068001	protein_coding	-2.21937	3
ENSG00000068024	protein_coding	0.0572573	0
ENSG00000068028	protein_coding	-0.499233	2
ENSG00000068078	protein_coding	-2.02198	0
ENSG00000068079	protein_coding	#N/A	0
ENSG00000068097	protein_coding	-0.457896	3
ENSG00000068120	protein_coding	-0.39526	0
ENSG00000068137	protein_coding	-0.740913	2
ENSG00000068305	protein_coding	-0.524842	2
ENSG00000068308	protein_coding	0.568745	5
ENSG00000068323	protein_coding	0.415037	0
ENSG00000068354	protein_coding	-0.418313	2
ENSG00000068366	protein_coding	0.56246	0
ENSG00000068383	protein_coding	-1.60507	0
ENSG00000068394	protein_coding	-0.23418	0
ENSG00000068400	protein_coding	-0.649738	0
ENSG00000068438	protein_coding	0.0513635	1
ENSG00000068489	protein_coding	1.25268	2
ENSG00000068615	protein_coding	0.584963	0
ENSG00000068650	protein_coding	-0.856473	1
ENSG00000068654	protein_coding	-1.00677	3
ENSG00000068697	protein_coding	1.48552	0
ENSG00000068724	protein_coding	-1.54579	0
ENSG00000068745	protein_coding	-0.953626	4
ENSG00000068781	protein_coding	1.32599	0
ENSG00000068784	protein_coding	-1.55946	4
ENSG00000068796	protein_coding	-0.562672	0
ENSG00000068831	protein_coding	#N/A	0
ENSG00000068878	protein_coding	-1.53712	2
ENSG00000068885	protein_coding	-2.39906	0
ENSG00000068903	protein_coding	0.65268	0
ENSG00000068912	protein_coding	-0.989583	0
ENSG00000068971	protein_coding	-2.02915	0
ENSG00000068976	protein_coding	#N/A	0
ENSG00000068985	protein_coding	#N/A	0
ENSG00000069011	protein_coding	0.536328	4
ENSG00000069018	protein_coding	#N/A	0
ENSG00000069020	protein_coding	-0.646163	3
ENSG00000069122	protein_coding	#N/A	0
ENSG00000069188	protein_coding	0.444258	1
ENSG00000069206	protein_coding	#N/A	0
ENSG00000069248	protein_coding	-1.32729	0
ENSG00000069275	protein_coding	-1.53448	3
ENSG00000069329	protein_coding	-0.276301	0
ENSG00000069345	protein_coding	-0.225931	0
ENSG00000069399	protein_coding	#N/A	0
ENSG00000069424	protein_coding	#N/A	0
ENSG00000069431	protein_coding	#N/A	0
ENSG00000069482	protein_coding	-5.63097	0
ENSG00000069493	protein_coding	#N/A	0
ENSG00000069509	protein_coding	0.720526	1
ENSG00000069535	protein_coding	#N/A	0
ENSG00000069667	protein_coding	-0.791413	0
ENSG00000069696	protein_coding	#N/A	0
ENSG00000069702	protein_coding	-0.941897	0
ENSG00000069712	protein_coding	0.195446	1
ENSG00000069764	protein_coding	#N/A	0
ENSG00000069812	protein_coding	#N/A	0
ENSG00000069849	protein_coding	0.928797	0
ENSG00000069869	protein_coding	0.150651	1
ENSG00000069943	protein_coding	-0.492598	0
ENSG00000069956	protein_coding	-1.56374	2
ENSG00000069966	protein_coding	0.667425	0
ENSG00000069974	protein_coding	0.834414	0
ENSG00000069998	protein_coding	-0.636899	1
ENSG00000070010	protein_coding	0.996582	0
ENSG00000070018	protein_coding	-1.70276	5
ENSG00000070019	protein_coding	#N/A	0
ENSG00000070031	protein_coding	#N/A	0
ENSG00000070047	protein_coding	-1.03342	8
ENSG00000070061	protein_coding	-1.32294	0
ENSG00000070081	protein_coding	-0.339228	0
ENSG00000070087	protein_coding	0.819763	0
ENSG00000070159	protein_coding	-0.502891	0
ENSG00000070182	protein_coding	-1.26039	0
ENSG00000070190	protein_coding	#N/A	0
ENSG00000070193	protein_coding	#N/A	0
ENSG00000070214	protein_coding	-0.601806	1
ENSG00000070269	protein_coding	-0.89503	1
ENSG00000070366	protein_coding	-0.601142	1
ENSG00000070367	protein_coding	-1.23458	0
ENSG00000070371	protein_coding	-1.63062	2
ENSG00000070388	protein_coding	#N/A	0
ENSG00000070404	protein_coding	#N/A	1
ENSG00000070413	protein_coding	-0.804537	8
ENSG00000070423	protein_coding	0.259977	1
ENSG00000070444	protein_coding	1.22471	0
ENSG00000070476	protein_coding	-0.88733	7
ENSG00000070495	protein_coding	0.452786	0
ENSG00000070501	protein_coding	-0.733315	0
ENSG00000070526	protein_coding	#N/A	0
ENSG00000070540	protein_coding	0.341037	0
ENSG00000070601	protein_coding	#N/A	0
ENSG00000070610	protein_coding	-2.6679	5
ENSG00000070614	protein_coding	-1.77052	8
ENSG00000070669	protein_coding	-0.118345	0
ENSG00000070718	protein_coding	-0.488474	3
ENSG00000070729	protein_coding	#N/A	0
ENSG00000070731	protein_coding	#N/A	0
ENSG00000070748	protein_coding	#N/A	0
ENSG00000070756	protein_coding	-0.823916	0
ENSG00000070759	protein_coding	-0.68226	0
ENSG00000070761	protein_coding	#N/A	0
ENSG00000070770	protein_coding	#NUM!	2
ENSG00000070778	protein_coding	-2.04122	1
ENSG00000070785	protein_coding	-0.194433	0
ENSG00000070808	protein_coding	#N/A	0
ENSG00000070814	protein_coding	-0.519534	3
ENSG00000070831	protein_coding	0.922142	0
ENSG00000070882	protein_coding	-0.768095	0
ENSG00000070886	protein_coding	-0.494765	2
ENSG00000070915	protein_coding	#N/A	0
ENSG00000070950	protein_coding	-0.103657	0
ENSG00000070961	protein_coding	-0.463676	3
ENSG00000070985	protein_coding	#N/A	0
ENSG00000071051	protein_coding	-0.695689	1
ENSG00000071054	protein_coding	-1.38666	2
ENSG00000071073	protein_coding	-0.796205	2
ENSG00000071082	protein_coding	-0.66259	0
ENSG00000071127	protein_coding	0.475239	0
ENSG00000071189	protein_coding	-2.8402	0
ENSG00000071203	protein_coding	#N/A	0
ENSG00000071205	protein_coding	-1.03068	0
ENSG00000071242	protein_coding	-2.7425	0
ENSG00000071243	protein_coding	-0.0980691	0
ENSG00000071246	protein_coding	-2.96467	5
ENSG00000071282	protein_coding	#N/A	0
ENSG00000071462	protein_coding	0.252429	0
ENSG00000071537	protein_coding	-0.566385	4
ENSG00000071539	protein_coding	1.00428	0
ENSG00000071553	protein_coding	1.1882	0
ENSG00000071564	protein_coding	-0.413076	0
ENSG00000071575	protein_coding	#N/A	5
ENSG00000071626	protein_coding	0.106572	0
ENSG00000071655	protein_coding	-0.337922	7
ENSG00000071677	protein_coding	#N/A	0
ENSG00000071794	protein_coding	-0.0576728	0
ENSG00000071859	protein_coding	0.0570632	0
ENSG00000071889	protein_coding	-1.3545	0
ENSG00000071894	protein_coding	-0.520166	0
ENSG00000071909	protein_coding	#N/A	0
ENSG00000071967	protein_coding	0.612184	0
ENSG00000071991	protein_coding	#N/A	0
ENSG00000071994	protein_coding	-0.723406	2
ENSG00000072041	protein_coding	-0.556171	0
ENSG00000072042	protein_coding	0.306302	0
ENSG00000072062	protein_coding	1.9542	0
ENSG00000072071	protein_coding	#N/A	6
ENSG00000072080	protein_coding	#N/A	0
ENSG00000072110	protein_coding	0.856956	0
ENSG00000072121	protein_coding	-2.60174	6
ENSG00000072133	protein_coding	-3.65412	0
ENSG00000072134	protein_coding	-0.809316	4
ENSG00000072135	protein_coding	-0.702614	0
ENSG00000072163	protein_coding	#N/A	0
ENSG00000072182	protein_coding	#N/A	0
ENSG00000072195	protein_coding	-0.446402	0
ENSG00000072201	protein_coding	#N/A	0
ENSG00000072210	protein_coding	-0.727264	0
ENSG00000072274	protein_coding	-1.12638	1
ENSG00000072310	protein_coding	-0.825267	0
ENSG00000072315	protein_coding	#N/A	0
ENSG00000072364	protein_coding	0.000444248	7
ENSG00000072401	protein_coding	1.43597	0
ENSG00000072415	protein_coding	-1.16523	2
ENSG00000072422	protein_coding	-0.540996	2
ENSG00000072501	protein_coding	-0.0718952	4
ENSG00000072506	protein_coding	0.206369	0
ENSG00000072518	protein_coding	-0.852412	2
ENSG00000072571	protein_coding	-0.278687	0
ENSG00000072609	protein_coding	-0.400213	0
ENSG00000072657	protein_coding	#N/A	0
ENSG00000072682	protein_coding	1.13678	0
ENSG00000072694	protein_coding	#N/A	0
ENSG00000072736	protein_coding	-1.53561	3
ENSG00000072756	protein_coding	-1.22136	2
ENSG00000072778	protein_coding	-0.289161	1
ENSG00000072786	protein_coding	-1.01244	3
ENSG00000072803	protein_coding	-0.624676	0
ENSG00000072818	protein_coding	#N/A	0
ENSG00000072832	protein_coding	#N/A	2
ENSG00000072840	protein_coding	-3.259	2
ENSG00000072849	protein_coding	0.778973	2
ENSG00000072858	protein_coding	#N/A	0
ENSG00000072864	protein_coding	-0.826707	5
ENSG00000072952	protein_coding	#N/A	0
ENSG00000072954	protein_coding	0.869416	0
ENSG00000072958	protein_coding	1.63296	0
ENSG00000073008	protein_coding	0.209308	6
ENSG00000073050	protein_coding	1.00718	0
ENSG00000073060	protein_coding	1.31702	1
ENSG00000073067	protein_coding	#N/A	0
ENSG00000073111	protein_coding	-0.130966	2
ENSG00000073146	protein_coding	#N/A	0
ENSG00000073150	protein_coding	#N/A	0
ENSG00000073169	protein_coding	-0.586121	3
ENSG00000073282	protein_coding	-2.57779	0
ENSG00000073331	protein_coding	-0.247218	3
ENSG00000073350	protein_coding	-3.48113	0
ENSG00000073417	protein_coding	-2.80735	2
ENSG00000073464	protein_coding	#N/A	0
ENSG00000073536	protein_coding	0.172269	0
ENSG00000073578	protein_coding	0.0954474	0
ENSG00000073584	protein_coding	-0.380386	0
ENSG00000073598	protein_coding	#N/A	0
ENSG00000073605	protein_coding	#N/A	0
ENSG00000073614	protein_coding	-1.57719	8
ENSG00000073670	protein_coding	-0.479993	2
ENSG00000073711	protein_coding	-0.78795	0
ENSG00000073712	protein_coding	0.432307	0
ENSG00000073734	protein_coding	#N/A	0
ENSG00000073737	protein_coding	#N/A	0
ENSG00000073754	protein_coding	#N/A	0
ENSG00000073756	protein_coding	-1.65896	0
ENSG00000073792	protein_coding	0.849448	0
ENSG00000073803	protein_coding	#N/A	0
ENSG00000073849	protein_coding	-0.230613	2
ENSG00000073861	protein_coding	#N/A	0
ENSG00000073910	protein_coding	-1.60245	0
ENSG00000073921	protein_coding	-0.179788	1
ENSG00000073969	protein_coding	-0.398383	0
ENSG00000074047	protein_coding	0.710493	2
ENSG00000074054	protein_coding	-1.20124	2
ENSG00000074071	protein_coding	0.233167	2
ENSG00000074181	protein_coding	0.806275	0
ENSG00000074201	protein_coding	-0.119385	0
ENSG00000074211	protein_coding	#N/A	0
ENSG00000074219	protein_coding	-1.72085	0
ENSG00000074266	protein_coding	-0.771597	1
ENSG00000074276	protein_coding	#N/A	0
ENSG00000074317	protein_coding	#N/A	0
ENSG00000074319	protein_coding	1.27202	0
ENSG00000074356	protein_coding	#N/A	4
ENSG00000074370	protein_coding	#N/A	0
ENSG00000074410	protein_coding	#N/A	1
ENSG00000074416	protein_coding	#N/A	0
ENSG00000074527	protein_coding	#N/A	0
ENSG00000074582	protein_coding	-0.533169	1
ENSG00000074590	protein_coding	-0.619857	6
ENSG00000074603	protein_coding	-1.05817	1
ENSG00000074621	protein_coding	-3.0915	2
ENSG00000074657	protein_coding	-8.12153	1
ENSG00000074660	protein_coding	#N/A	0
ENSG00000074695	protein_coding	-0.2988	0
ENSG00000074696	protein_coding	#N/A	1
ENSG00000074706	protein_coding	0.04828	0
ENSG00000074755	protein_coding	-1.3248	3
ENSG00000074771	protein_coding	#N/A	0
ENSG00000074800	protein_coding	0.492922	0
ENSG00000074803	protein_coding	#N/A	0
ENSG00000074842	protein_coding	#N/A	0
ENSG00000074855	protein_coding	-0.365649	3
ENSG00000074935	protein_coding	-1.2083	0
ENSG00000074964	protein_coding	-0.459432	0
ENSG00000074966	protein_coding	#N/A	0
ENSG00000075035	protein_coding	#N/A	0
ENSG00000075043	protein_coding	-2.92832	0
ENSG00000075073	protein_coding	#N/A	0
ENSG00000075089	protein_coding	0.21654	0
ENSG00000075131	protein_coding	-0.304639	0
ENSG00000075142	protein_coding	-0.0182314	0
ENSG00000075151	protein_coding	-0.447816	2
ENSG00000075188	protein_coding	0.513852	0
ENSG00000075213	protein_coding	0.963474	2
ENSG00000075218	protein_coding	0.804001	1
ENSG00000075223	protein_coding	-1.72727	2
ENSG00000075234	protein_coding	-0.538654	0
ENSG00000075239	protein_coding	0.077317	0
ENSG00000075240	protein_coding	-0.879146	2
ENSG00000075275	protein_coding	-1.34903	9
ENSG00000075290	protein_coding	#N/A	0
ENSG00000075292	protein_coding	-2.29322	9
ENSG00000075303	protein_coding	-1.21826	0
ENSG00000075336	protein_coding	0.621488	0
ENSG00000075340	protein_coding	-0.382877	0
ENSG00000075388	protein_coding	#N/A	0
ENSG00000075391	protein_coding	-1.61298	3
ENSG00000075399	protein_coding	#N/A	5
ENSG00000075407	protein_coding	-1.63414	5
ENSG00000075413	protein_coding	-1.26751	1
ENSG00000075415	protein_coding	-0.165953	0
ENSG00000075420	protein_coding	0.115228	0
ENSG00000075426	protein_coding	#N/A	2
ENSG00000075429	protein_coding	#N/A	0
ENSG00000075461	protein_coding	#N/A	0
ENSG00000075539	protein_coding	-1.39444	3
ENSG00000075568	protein_coding	-1.32161	2
ENSG00000075618	protein_coding	3.18423	0
ENSG00000075624	protein_coding	1.57736	1
ENSG00000075643	protein_coding	-1.81558	2
ENSG00000075651	protein_coding	0.940946	1
ENSG00000075673	protein_coding	#N/A	0
ENSG00000075702	protein_coding	-0.262559	0
ENSG00000075711	protein_coding	-1.12023	0
ENSG00000075785	protein_coding	2.42089	0
ENSG00000075790	protein_coding	-0.0786325	1
ENSG00000075826	protein_coding	-6.20163	2
ENSG00000075856	protein_coding	-0.783674	2
ENSG00000075884	protein_coding	#N/A	0
ENSG00000075886	protein_coding	#N/A	0
ENSG00000075891	protein_coding	#N/A	0
ENSG00000075914	protein_coding	-1.29496	0
ENSG00000075945	protein_coding	0.0326589	0
ENSG00000075975	protein_coding	-0.393061	0
ENSG00000076003	protein_coding	-0.263374	0
ENSG00000076043	protein_coding	0.11063	0
ENSG00000076053	protein_coding	0.400879	2
ENSG00000076067	protein_coding	0.701238	0
ENSG00000076108	protein_coding	0.00692891	0
ENSG00000076201	protein_coding	-0.0371391	0
ENSG00000076242	protein_coding	#N/A	0
ENSG00000076248	protein_coding	0.318051	0
ENSG00000076258	protein_coding	-0.649093	0
ENSG00000076321	protein_coding	-1.19971	1
ENSG00000076344	protein_coding	#N/A	0
ENSG00000076351	protein_coding	1.02584	0
ENSG00000076356	protein_coding	-0.830075	0
ENSG00000076382	protein_coding	-0.975057	2
ENSG00000076513	protein_coding	-0.48765	0
ENSG00000076554	protein_coding	1.18688	0
ENSG00000076555	protein_coding	-2.84029	2
ENSG00000076604	protein_coding	-0.320007	3
ENSG00000076641	protein_coding	-0.74742	6
ENSG00000076650	protein_coding	0.191852	0
ENSG00000076662	protein_coding	#N/A	2
ENSG00000076685	protein_coding	0.47703	0
ENSG00000076706	protein_coding	-0.0790716	1
ENSG00000076716	protein_coding	1.77594	0
ENSG00000076770	protein_coding	0.626542	0
ENSG00000076826	protein_coding	1.03052	0
ENSG00000076864	protein_coding	1.25846	0
ENSG00000076924	protein_coding	1.37598	0
ENSG00000076928	protein_coding	0.770599	0
ENSG00000076944	protein_coding	1.08831	0
ENSG00000076984	protein_coding	1.22191	2
ENSG00000077009	protein_coding	#N/A	0
ENSG00000077044	protein_coding	-1.63202	0
ENSG00000077063	protein_coding	-0.143432	1
ENSG00000077080	protein_coding	#N/A	0
ENSG00000077092	protein_coding	-0.744383	3
ENSG00000077097	protein_coding	-1.87216	0
ENSG00000077147	protein_coding	-0.473511	1
ENSG00000077150	protein_coding	1.08989	0
ENSG00000077152	protein_coding	0.294725	0
ENSG00000077157	protein_coding	-3.19172	0
ENSG00000077232	protein_coding	-2.51924	0
ENSG00000077235	protein_coding	-0.839302	3
ENSG00000077238	protein_coding	-1.16046	0
ENSG00000077254	protein_coding	-0.772909	0
ENSG00000077264	protein_coding	#N/A	0
ENSG00000077274	protein_coding	#N/A	0
ENSG00000077279	protein_coding	#N/A	0
ENSG00000077312	protein_coding	0.970944	0
ENSG00000077327	protein_coding	#N/A	0
ENSG00000077348	protein_coding	0.755763	0
ENSG00000077380	protein_coding	-0.00860502	0
ENSG00000077420	protein_coding	#N/A	0
ENSG00000077454	protein_coding	0.419775	0
ENSG00000077458	protein_coding	-1.47738	0
ENSG00000077463	protein_coding	0.693447	0
ENSG00000077498	protein_coding	#N/A	0
ENSG00000077514	protein_coding	-1.22672	1
ENSG00000077522	protein_coding	-1.23412	0
ENSG00000077549	protein_coding	1.50748	0
ENSG00000077585	protein_coding	-0.724635	0
ENSG00000077616	protein_coding	-0.79518	0
ENSG00000077684	protein_coding	#N/A	6
ENSG00000077713	protein_coding	-6.70044	1
ENSG00000077721	protein_coding	2.0374	0
ENSG00000077782	protein_coding	-0.699039	0
ENSG00000077800	protein_coding	#N/A	0
ENSG00000077935	protein_coding	#N/A	0
ENSG00000077942	protein_coding	1.52192	0
ENSG00000077943	protein_coding	0.726036	1
ENSG00000077984	protein_coding	#N/A	0
ENSG00000078018	protein_coding	#N/A	0
ENSG00000078043	protein_coding	-0.703706	1
ENSG00000078053	protein_coding	0.476753	0
ENSG00000078061	protein_coding	-0.26638	1
ENSG00000078070	protein_coding	-0.0122436	0
ENSG00000078081	protein_coding	#N/A	0
ENSG00000078098	protein_coding	#N/A	0
ENSG00000078114	protein_coding	-0.229201	0
ENSG00000078124	protein_coding	0.0219148	0
ENSG00000078140	protein_coding	1.15116	0
ENSG00000078142	protein_coding	0.18233	0
ENSG00000078177	protein_coding	-1.79435	2
ENSG00000078237	protein_coding	#N/A	1
ENSG00000078246	protein_coding	0.117357	3
ENSG00000078269	protein_coding	-0.43515	3
ENSG00000078295	protein_coding	#N/A	0
ENSG00000078304	protein_coding	-0.170522	1
ENSG00000078328	protein_coding	#N/A	0
ENSG00000078369	protein_coding	1.45984	0
ENSG00000078399	protein_coding	1.14162	1
ENSG00000078401	protein_coding	#N/A	0
ENSG00000078403	protein_coding	-1.32988	0
ENSG00000078487	protein_coding	0.298081	0
ENSG00000078549	protein_coding	#N/A	0
ENSG00000078579	protein_coding	#N/A	0
ENSG00000078589	protein_coding	#N/A	0
ENSG00000078596	protein_coding	#N/A	0
ENSG00000078618	protein_coding	#N/A	2
ENSG00000078668	protein_coding	0.410712	0
ENSG00000078674	protein_coding	-1.03583	0
ENSG00000078687	protein_coding	-1.27555	4
ENSG00000078699	protein_coding	0.332753	7
ENSG00000078725	protein_coding	#N/A	0
ENSG00000078747	protein_coding	-1.25092	0
ENSG00000078795	protein_coding	#N/A	0
ENSG00000078804	protein_coding	#N/A	0
ENSG00000078808	protein_coding	0.507528	0
ENSG00000078814	protein_coding	#N/A	0
ENSG00000078898	protein_coding	#N/A	0
ENSG00000078900	protein_coding	1.86532	0
ENSG00000078902	protein_coding	0.993602	0
ENSG00000078967	protein_coding	-0.263034	2
ENSG00000079101	protein_coding	#N/A	0
ENSG00000079102	protein_coding	#N/A	2
ENSG00000079112	protein_coding	#N/A	0
ENSG00000079134	protein_coding	-0.783114	1
ENSG00000079150	protein_coding	-1	0
ENSG00000079156	protein_coding	-1.03887	0
ENSG00000079215	protein_coding	-0.794314	2
ENSG00000079246	protein_coding	0.226163	0
ENSG00000079257	protein_coding	#N/A	0
ENSG00000079263	protein_coding	#N/A	0
ENSG00000079277	protein_coding	-0.0590355	0
ENSG00000079308	protein_coding	#N/A	0
ENSG00000079313	protein_coding	-1.43373	5
ENSG00000079332	protein_coding	0.671076	2
ENSG00000079335	protein_coding	1.16993	0
ENSG00000079337	protein_coding	#N/A	0
ENSG00000079385	protein_coding	#N/A	0
ENSG00000079387	protein_coding	-0.88829	2
ENSG00000079393	protein_coding	#N/A	0
ENSG00000079432	protein_coding	-1.12995	1
ENSG00000079435	protein_coding	#N/A	0
ENSG00000079459	protein_coding	0.643762	0
ENSG00000079462	protein_coding	0.650992	0
ENSG00000079482	protein_coding	-1.84951	2
ENSG00000079557	protein_coding	#N/A	0
ENSG00000079616	protein_coding	-0.217311	0
ENSG00000079689	protein_coding	#N/A	0
ENSG00000079691	protein_coding	-0.21747	0
ENSG00000079739	protein_coding	-0.395705	1
ENSG00000079785	protein_coding	-0.475608	0
ENSG00000079805	protein_coding	0.26896	0
ENSG00000079819	protein_coding	-0.0494212	0
ENSG00000079841	protein_coding	#N/A	0
ENSG00000079931	protein_coding	-0.223543	0
ENSG00000079950	protein_coding	1.89308	0
ENSG00000079974	protein_coding	-0.195551	0
ENSG00000079999	protein_coding	-0.718729	2
ENSG00000080007	protein_coding	#N/A	0
ENSG00000080031	protein_coding	#N/A	0
ENSG00000080166	protein_coding	#N/A	0
ENSG00000080189	protein_coding	-0.440366	5
ENSG00000080200	protein_coding	-2.49856	0
ENSG00000080224	protein_coding	-1.96248	5
ENSG00000080293	protein_coding	#N/A	0
ENSG00000080298	protein_coding	0.535494	1
ENSG00000080345	protein_coding	-1.68317	4
ENSG00000080371	protein_coding	1.57908	1
ENSG00000080493	protein_coding	-0.605427	0
ENSG00000080503	protein_coding	0.0444275	0
ENSG00000080511	protein_coding	#N/A	0
ENSG00000080546	protein_coding	0.929008	3
ENSG00000080561	protein_coding	-1.50808	4
ENSG00000080572	protein_coding	#N/A	0
ENSG00000080573	protein_coding	#N/A	0
ENSG00000080603	protein_coding	-2.23815	9
ENSG00000080608	protein_coding	#N/A	0
ENSG00000080618	protein_coding	#N/A	0
ENSG00000080644	protein_coding	#N/A	0
ENSG00000080709	protein_coding	#N/A	0
ENSG00000080802	protein_coding	0.493865	0
ENSG00000080815	protein_coding	-0.348895	2
ENSG00000080819	protein_coding	-0.325085	0
ENSG00000080822	protein_coding	-1.02726	0
ENSG00000080823	protein_coding	-1.58972	0
ENSG00000080824	protein_coding	0.482255	1
ENSG00000080839	protein_coding	-0.51977	0
ENSG00000080845	protein_coding	0.905673	0
ENSG00000080854	protein_coding	-1.93441	0
ENSG00000080910	protein_coding	#N/A	0
ENSG00000080986	protein_coding	-0.395322	0
ENSG00000081014	protein_coding	-1.13955	0
ENSG00000081019	protein_coding	-0.881494	2
ENSG00000081026	protein_coding	-2.44918	5
ENSG00000081041	protein_coding	#N/A	0
ENSG00000081051	protein_coding	#N/A	0
ENSG00000081052	protein_coding	1.64508	0
ENSG00000081059	protein_coding	#N/A	0
ENSG00000081087	protein_coding	0.488258	0
ENSG00000081138	protein_coding	#N/A	0
ENSG00000081148	protein_coding	#N/A	0
ENSG00000081154	protein_coding	0.242987	0
ENSG00000081177	protein_coding	-0.975926	0
ENSG00000081181	protein_coding	1.06848	0
ENSG00000081189	protein_coding	0.597453	0
ENSG00000081237	protein_coding	#N/A	0
ENSG00000081248	protein_coding	#N/A	0
ENSG00000081277	protein_coding	#N/A	0
ENSG00000081307	protein_coding	-0.44537	2
ENSG00000081320	protein_coding	-0.141155	1
ENSG00000081377	protein_coding	-1.99616	1
ENSG00000081386	protein_coding	-1.69569	3
ENSG00000081479	protein_coding	-1.57409	4
ENSG00000081665	protein_coding	#N/A	0
ENSG00000081692	protein_coding	-0.857386	7
ENSG00000081721	protein_coding	-1.15585	0
ENSG00000081760	protein_coding	0.758421	0
ENSG00000081791	protein_coding	0.449946	0
ENSG00000081800	protein_coding	#N/A	0
ENSG00000081803	protein_coding	-0.343954	1
ENSG00000081818	protein_coding	#N/A	0
ENSG00000081842	protein_coding	#N/A	0
ENSG00000081853	protein_coding	#N/A	0
ENSG00000081870	protein_coding	0.579145	0
ENSG00000081913	protein_coding	-0.251462	5
ENSG00000081923	protein_coding	#N/A	0
ENSG00000081985	protein_coding	1.0658	0
ENSG00000082014	protein_coding	-1.1365	0
ENSG00000082068	protein_coding	-0.345054	0
ENSG00000082074	protein_coding	#N/A	0
ENSG00000082126	protein_coding	#N/A	0
ENSG00000082146	protein_coding	-2.07653	0
ENSG00000082153	protein_coding	-0.719924	0
ENSG00000082175	protein_coding	#N/A	0
ENSG00000082196	protein_coding	#N/A	0
ENSG00000082212	protein_coding	0.935004	0
ENSG00000082213	protein_coding	0.600904	2
ENSG00000082258	protein_coding	-1.7153	2
ENSG00000082269	protein_coding	-2.207	2
ENSG00000082293	protein_coding	-1.06413	0
ENSG00000082397	protein_coding	0.608278	0
ENSG00000082438	protein_coding	-0.485946	2
ENSG00000082458	protein_coding	-0.0964045	2
ENSG00000082482	protein_coding	#N/A	0
ENSG00000082497	protein_coding	1.2777	0
ENSG00000082512	protein_coding	-0.371141	2
ENSG00000082515	protein_coding	1.20561	0
ENSG00000082516	protein_coding	-0.633935	4
ENSG00000082556	protein_coding	#N/A	0
ENSG00000082641	protein_coding	0.420767	11
ENSG00000082684	protein_coding	#N/A	0
ENSG00000082701	protein_coding	-0.928447	2
ENSG00000082781	protein_coding	-1.13446	0
ENSG00000082805	protein_coding	-0.801194	13
ENSG00000082898	protein_coding	-0.977372	2
ENSG00000082996	protein_coding	-1.04114	1
ENSG00000083067	protein_coding	#N/A	0
ENSG00000083093	protein_coding	-2.07487	5
ENSG00000083097	protein_coding	-1.68115	5
ENSG00000083099	protein_coding	0.858562	1
ENSG00000083123	protein_coding	0.141356	0
ENSG00000083168	protein_coding	-1.30413	12
ENSG00000083223	protein_coding	-1.38929	6
ENSG00000083290	protein_coding	-4.02975	2
ENSG00000083307	protein_coding	#N/A	0
ENSG00000083312	protein_coding	-0.857176	0
ENSG00000083444	protein_coding	0.551279	0
ENSG00000083454	protein_coding	#N/A	0
ENSG00000083457	protein_coding	-0.440573	1
ENSG00000083520	protein_coding	-1.17151	0
ENSG00000083535	protein_coding	-1.15638	0
ENSG00000083544	protein_coding	-0.772522	0
ENSG00000083635	protein_coding	-0.296326	0
ENSG00000083642	protein_coding	-0.86151	1
ENSG00000083720	protein_coding	0.875106	0
ENSG00000083750	protein_coding	-1.4184	0
ENSG00000083782	protein_coding	#N/A	0
ENSG00000083799	protein_coding	-1.85542	2
ENSG00000083807	protein_coding	-1.70044	0
ENSG00000083812	protein_coding	-0.654004	9
ENSG00000083814	protein_coding	#N/A	0
ENSG00000083817	protein_coding	-0.199564	3
ENSG00000083828	protein_coding	-0.429113	1
ENSG00000083838	protein_coding	0.0415193	5
ENSG00000083844	protein_coding	-0.781943	5
ENSG00000083845	protein_coding	-0.291101	0
ENSG00000083857	protein_coding	-1.41733	31
ENSG00000083896	protein_coding	-0.793087	0
ENSG00000083937	protein_coding	-0.113898	0
ENSG00000084070	protein_coding	0.745553	0
ENSG00000084072	protein_coding	0.88436	0
ENSG00000084073	protein_coding	0.443213	1
ENSG00000084090	protein_coding	-1.81431	2
ENSG00000084092	protein_coding	-1.05202	4
ENSG00000084093	protein_coding	-0.487477	9
ENSG00000084110	protein_coding	#N/A	0
ENSG00000084112	protein_coding	-1.8661	5
ENSG00000084207	protein_coding	-1.92279	0
ENSG00000084234	protein_coding	-0.096341	1
ENSG00000084444	protein_coding	#N/A	0
ENSG00000084453	protein_coding	#N/A	0
ENSG00000084463	protein_coding	0.205844	0
ENSG00000084623	protein_coding	0.266633	1
ENSG00000084628	protein_coding	#N/A	0
ENSG00000084636	protein_coding	#N/A	0
ENSG00000084652	protein_coding	-0.411222	4
ENSG00000084674	protein_coding	#N/A	0
ENSG00000084676	protein_coding	-1.02995	2
ENSG00000084693	protein_coding	-2.17976	0
ENSG00000084710	protein_coding	1	0
ENSG00000084731	protein_coding	-0.721284	5
ENSG00000084733	protein_coding	0.223883	1
ENSG00000084734	protein_coding	#N/A	0
ENSG00000084754	protein_coding	-0.70629	0
ENSG00000084764	protein_coding	2.67417	0
ENSG00000084774	protein_coding	-0.444657	0
ENSG00000085063	protein_coding	0.889186	4
ENSG00000085117	protein_coding	#N/A	0
ENSG00000085185	protein_coding	0.921288	1
ENSG00000085224	protein_coding	-2.2185	0
ENSG00000085231	protein_coding	#N/A	0
ENSG00000085265	protein_coding	#N/A	0
ENSG00000085274	protein_coding	-1.98423	2
ENSG00000085276	protein_coding	-0.717732	4
ENSG00000085365	protein_coding	0.766969	0
ENSG00000085377	protein_coding	0.793365	2
ENSG00000085382	protein_coding	-2.03966	0
ENSG00000085415	protein_coding	-0.0426767	0
ENSG00000085433	protein_coding	-0.447971	2
ENSG00000085449	protein_coding	0.54979	0
ENSG00000085465	protein_coding	-5.59246	0
ENSG00000085491	protein_coding	-0.439689	2
ENSG00000085511	protein_coding	-2.4756	8
ENSG00000085514	protein_coding	-4.24793	0
ENSG00000085552	protein_coding	#N/A	0
ENSG00000085563	protein_coding	2.32777	0
ENSG00000085644	protein_coding	-1.01089	0
ENSG00000085662	protein_coding	1.14698	0
ENSG00000085719	protein_coding	-0.143989	0
ENSG00000085721	protein_coding	-0.562285	1
ENSG00000085733	protein_coding	-0.160313	2
ENSG00000085741	protein_coding	#N/A	2
ENSG00000085760	protein_coding	-2.06821	0
ENSG00000085788	protein_coding	-1.31817	0
ENSG00000085831	protein_coding	1.73434	0
ENSG00000085832	protein_coding	-0.754546	0
ENSG00000085840	protein_coding	-0.924007	0
ENSG00000085871	protein_coding	1.66022	0
ENSG00000085872	protein_coding	2.43407	5
ENSG00000085978	protein_coding	-0.77329	0
ENSG00000085982	protein_coding	-2.04348	1
ENSG00000085998	protein_coding	-1.3061	1
ENSG00000085999	protein_coding	-1.14419	0
ENSG00000086015	protein_coding	-1.08558	5
ENSG00000086061	protein_coding	-0.432447	2
ENSG00000086062	protein_coding	1.4039	0
ENSG00000086065	protein_coding	0.208011	0
ENSG00000086102	protein_coding	-1.34302	4
ENSG00000086159	protein_coding	#N/A	0
ENSG00000086189	protein_coding	-0.355729	0
ENSG00000086200	protein_coding	-0.752733	0
ENSG00000086205	protein_coding	#N/A	0
ENSG00000086232	protein_coding	-0.749931	2
ENSG00000086288	protein_coding	#N/A	0
ENSG00000086289	protein_coding	2.7794	1
ENSG00000086300	protein_coding	1.51165	0
ENSG00000086475	protein_coding	-0.164918	2
ENSG00000086504	protein_coding	1.67281	0
ENSG00000086506	protein_coding	#N/A	0
ENSG00000086544	protein_coding	0.514012	5
ENSG00000086548	protein_coding	#N/A	0
ENSG00000086570	protein_coding	#N/A	0
ENSG00000086589	protein_coding	-0.311493	0
ENSG00000086598	protein_coding	0.522929	0
ENSG00000086619	protein_coding	#N/A	0
ENSG00000086666	protein_coding	0.676012	0
ENSG00000086696	protein_coding	#N/A	0
ENSG00000086712	protein_coding	0.154653	2
ENSG00000086717	protein_coding	#N/A	0
ENSG00000086730	protein_coding	#N/A	0
ENSG00000086758	protein_coding	-1.24551	3
ENSG00000086827	protein_coding	-0.874565	0
ENSG00000086848	protein_coding	-0.316184	0
ENSG00000086967	protein_coding	#N/A	0
ENSG00000086991	protein_coding	#N/A	0
ENSG00000087008	protein_coding	-1.01519	2
ENSG00000087053	protein_coding	-0.599552	0
ENSG00000087074	protein_coding	-2.06471	1
ENSG00000087076	protein_coding	#N/A	0
ENSG00000087077	protein_coding	1.16645	0
ENSG00000087085	protein_coding	#N/A	0
ENSG00000087086	protein_coding	-1.75346	0
ENSG00000087087	protein_coding	-0.298754	0
ENSG00000087088	protein_coding	0.67714	0
ENSG00000087095	protein_coding	-1.25956	0
ENSG00000087111	protein_coding	-0.483978	0
ENSG00000087116	protein_coding	#N/A	0
ENSG00000087128	protein_coding	#N/A	0
ENSG00000087152	protein_coding	-2.29134	3
ENSG00000087157	protein_coding	-0.377756	3
ENSG00000087191	protein_coding	1.06247	0
ENSG00000087206	protein_coding	-1.86774	2
ENSG00000087237	protein_coding	#N/A	0
ENSG00000087245	protein_coding	#N/A	0
ENSG00000087250	protein_coding	#N/A	0
ENSG00000087253	protein_coding	-0.101402	0
ENSG00000087258	protein_coding	#N/A	0
ENSG00000087263	protein_coding	-0.549948	2
ENSG00000087266	protein_coding	-1.62149	0
ENSG00000087269	protein_coding	-1.31354	0
ENSG00000087274	protein_coding	0.226737	0
ENSG00000087299	protein_coding	-0.466673	0
ENSG00000087301	protein_coding	-0.897454	0
ENSG00000087302	protein_coding	-0.00428051	0
ENSG00000087303	protein_coding	0.856194	1
ENSG00000087338	protein_coding	-1.99704	1
ENSG00000087365	protein_coding	-0.418832	0
ENSG00000087448	protein_coding	0.26018	5
ENSG00000087460	protein_coding	0.991092	0
ENSG00000087470	protein_coding	-0.134876	0
ENSG00000087494	protein_coding	#N/A	0
ENSG00000087495	protein_coding	#N/A	0
ENSG00000087502	protein_coding	-0.807119	0
ENSG00000087510	protein_coding	1.66297	1
ENSG00000087586	protein_coding	0.436368	0
ENSG00000087589	protein_coding	#N/A	0
ENSG00000087842	protein_coding	-0.434882	0
ENSG00000087884	protein_coding	-0.833808	0
ENSG00000087903	protein_coding	-0.63743	0
ENSG00000087995	protein_coding	-0.252122	1
ENSG00000088002	protein_coding	#N/A	0
ENSG00000088035	protein_coding	-1.21035	0
ENSG00000088038	protein_coding	0.787323	0
ENSG00000088053	protein_coding	#N/A	0
ENSG00000088179	protein_coding	-3.57116	0
ENSG00000088205	protein_coding	-0.886069	0
ENSG00000088247	protein_coding	0.529508	1
ENSG00000088256	protein_coding	0.150417	0
ENSG00000088280	protein_coding	-0.681552	0
ENSG00000088298	protein_coding	-1.93383	2
ENSG00000088305	protein_coding	-0.857396	0
ENSG00000088320	protein_coding	#N/A	0
ENSG00000088325	protein_coding	-0.763756	0
ENSG00000088356	protein_coding	0.481317	3
ENSG00000088367	protein_coding	-1.09311	2
ENSG00000088386	protein_coding	#N/A	0
ENSG00000088387	protein_coding	-1.43689	0
ENSG00000088448	protein_coding	-1.73085	4
ENSG00000088451	protein_coding	-1.03769	0
ENSG00000088538	protein_coding	-2.76323	2
ENSG00000088543	protein_coding	#N/A	1
ENSG00000088682	protein_coding	-0.769756	0
ENSG00000088726	protein_coding	#N/A	0
ENSG00000088727	protein_coding	-1.46713	0
ENSG00000088756	protein_coding	1.04495	0
ENSG00000088766	protein_coding	-0.92797	1
ENSG00000088782	protein_coding	#N/A	0
ENSG00000088808	protein_coding	0.070527	0
ENSG00000088812	protein_coding	-0.626405	4
ENSG00000088826	protein_coding	-0.522953	0
ENSG00000088827	protein_coding	#N/A	0
ENSG00000088832	protein_coding	2.8234	0
ENSG00000088833	protein_coding	0.669128	0
ENSG00000088836	protein_coding	-0.237039	0
ENSG00000088854	protein_coding	-0.786921	0
ENSG00000088876	protein_coding	-2.30447	6
ENSG00000088881	protein_coding	#N/A	0
ENSG00000088882	protein_coding	#N/A	0
ENSG00000088888	protein_coding	1.54683	3
ENSG00000088899	protein_coding	-1.38904	0
ENSG00000088926	protein_coding	#N/A	0
ENSG00000088930	protein_coding	-0.66284	0
ENSG00000088970	protein_coding	#N/A	0
ENSG00000088986	protein_coding	1.09917	3
ENSG00000088992	protein_coding	2.10992	0
ENSG00000089006	protein_coding	-2.55888	1
ENSG00000089009	protein_coding	-0.528481	0
ENSG00000089012	protein_coding	#N/A	0
ENSG00000089022	protein_coding	-2.44132	0
ENSG00000089041	protein_coding	#N/A	0
ENSG00000089048	protein_coding	-1.14912	3
ENSG00000089050	protein_coding	2.05232	0
ENSG00000089053	protein_coding	-0.90717	0
ENSG00000089057	protein_coding	1.14813	2
ENSG00000089060	protein_coding	#N/A	0
ENSG00000089063	protein_coding	1.57321	0
ENSG00000089091	protein_coding	-0.350497	1
ENSG00000089094	protein_coding	-0.289914	3
ENSG00000089101	protein_coding	#N/A	0
ENSG00000089116	protein_coding	#N/A	0
ENSG00000089123	protein_coding	-2.99447	0
ENSG00000089127	protein_coding	#N/A	0
ENSG00000089154	protein_coding	#N/A	2
ENSG00000089157	protein_coding	-1.66881	0
ENSG00000089159	protein_coding	1.7546	0
ENSG00000089163	protein_coding	#N/A	1
ENSG00000089169	protein_coding	#N/A	0
ENSG00000089177	protein_coding	-1.7868	4
ENSG00000089195	protein_coding	-0.434682	2
ENSG00000089199	protein_coding	#N/A	0
ENSG00000089220	protein_coding	1.91549	0
ENSG00000089225	protein_coding	#N/A	0
ENSG00000089234	protein_coding	0.0355537	3
ENSG00000089248	protein_coding	0.134679	2
ENSG00000089250	protein_coding	#N/A	0
ENSG00000089280	protein_coding	2.44082	0
ENSG00000089289	protein_coding	-0.376028	1
ENSG00000089327	protein_coding	4.86423	0
ENSG00000089335	protein_coding	0.632345	2
ENSG00000089351	protein_coding	1.87814	0
ENSG00000089356	protein_coding	#N/A	0
ENSG00000089472	protein_coding	#N/A	0
ENSG00000089486	protein_coding	2.14743	0
ENSG00000089505	protein_coding	#N/A	3
ENSG00000089558	protein_coding	#N/A	0
ENSG00000089597	protein_coding	0.156109	0
ENSG00000089639	protein_coding	-0.0329146	0
ENSG00000089682	protein_coding	-1.50513	1
ENSG00000089685	protein_coding	-0.221739	1
ENSG00000089692	protein_coding	#N/A	0
ENSG00000089693	protein_coding	1.10096	0
ENSG00000089723	protein_coding	0.529253	4
ENSG00000089737	protein_coding	0.154808	10
ENSG00000089775	protein_coding	-0.0962153	4
ENSG00000089818	protein_coding	0.624491	0
ENSG00000089820	protein_coding	#N/A	0
ENSG00000089847	protein_coding	#N/A	0
ENSG00000089876	protein_coding	-0.624112	1
ENSG00000089902	protein_coding	0.396944	1
ENSG00000089916	protein_coding	-1.20896	4
ENSG00000090006	protein_coding	-0.417139	0
ENSG00000090013	protein_coding	2.11867	0
ENSG00000090020	protein_coding	1.5645	0
ENSG00000090054	protein_coding	-0.184672	1
ENSG00000090060	protein_coding	-0.671377	1
ENSG00000090061	protein_coding	0.961314	0
ENSG00000090097	protein_coding	0.152003	0
ENSG00000090104	protein_coding	#N/A	0
ENSG00000090238	protein_coding	#N/A	0
ENSG00000090263	protein_coding	0.271673	0
ENSG00000090266	protein_coding	0.863399	0
ENSG00000090273	protein_coding	1.29422	0
ENSG00000090316	protein_coding	0.31783	2
ENSG00000090339	protein_coding	#N/A	0
ENSG00000090372	protein_coding	-0.828786	0
ENSG00000090376	protein_coding	#N/A	0
ENSG00000090382	protein_coding	#N/A	0
ENSG00000090402	protein_coding	#N/A	0
ENSG00000090432	protein_coding	0.700014	6
ENSG00000090447	protein_coding	0.209453	0
ENSG00000090470	protein_coding	0.0433274	0
ENSG00000090487	protein_coding	-0.607024	0
ENSG00000090512	protein_coding	#N/A	0
ENSG00000090520	protein_coding	0.129125	0
ENSG00000090530	protein_coding	#N/A	0
ENSG00000090534	protein_coding	#N/A	0
ENSG00000090539	protein_coding	#N/A	0
ENSG00000090554	protein_coding	#N/A	0
ENSG00000090565	protein_coding	-2.14349	3
ENSG00000090581	protein_coding	-0.961526	0
ENSG00000090612	protein_coding	-1.24924	4
ENSG00000090615	protein_coding	-1.17563	4
ENSG00000090621	protein_coding	-0.0406618	0
ENSG00000090659	protein_coding	#N/A	0
ENSG00000090661	protein_coding	1.30724	0
ENSG00000090674	protein_coding	0.866046	0
ENSG00000090686	protein_coding	-0.409244	0
ENSG00000090776	protein_coding	0.927355	0
ENSG00000090857	protein_coding	-2.42602	6
ENSG00000090861	protein_coding	-0.138103	2
ENSG00000090863	protein_coding	-0.58229	4
ENSG00000090889	protein_coding	-0.694807	0
ENSG00000090905	protein_coding	-1.98558	11
ENSG00000090924	protein_coding	1.24576	3
ENSG00000090932	protein_coding	#N/A	0
ENSG00000090971	protein_coding	-0.297905	1
ENSG00000090975	protein_coding	-1.76818	0
ENSG00000090989	protein_coding	-0.800665	0
ENSG00000091009	protein_coding	-0.607764	0
ENSG00000091010	protein_coding	#N/A	0
ENSG00000091039	protein_coding	-0.651624	0
ENSG00000091073	protein_coding	0.309684	0
ENSG00000091106	protein_coding	#N/A	0
ENSG00000091127	protein_coding	-0.728538	2
ENSG00000091128	protein_coding	#N/A	0
ENSG00000091129	protein_coding	1.11672	0
ENSG00000091136	protein_coding	1.57774	0
ENSG00000091137	protein_coding	#N/A	0
ENSG00000091138	protein_coding	#N/A	0
ENSG00000091140	protein_coding	1.18361	0
ENSG00000091157	protein_coding	-1.4423	1
ENSG00000091164	protein_coding	1.2182	0
ENSG00000091181	protein_coding	#N/A	0
ENSG00000091262	protein_coding	#N/A	0
ENSG00000091317	protein_coding	0.0931094	0
ENSG00000091409	protein_coding	-0.0979752	0
ENSG00000091428	protein_coding	-0.491966	0
ENSG00000091436	protein_coding	#N/A	3
ENSG00000091482	protein_coding	#N/A	0
ENSG00000091483	protein_coding	-0.387886	0
ENSG00000091490	protein_coding	-0.228659	0
ENSG00000091513	protein_coding	#N/A	0
ENSG00000091527	protein_coding	0.0280438	2
ENSG00000091536	protein_coding	#N/A	0
ENSG00000091542	protein_coding	-2.02056	4
ENSG00000091583	protein_coding	#N/A	0
ENSG00000091592	protein_coding	#N/A	0
ENSG00000091622	protein_coding	#N/A	0
ENSG00000091640	protein_coding	-0.170541	0
ENSG00000091651	protein_coding	0.0233981	1
ENSG00000091656	protein_coding	-1.81293	18
ENSG00000091664	protein_coding	#N/A	0
ENSG00000091704	protein_coding	#N/A	0
ENSG00000091732	protein_coding	0.462742	2
ENSG00000091831	protein_coding	#N/A	0
ENSG00000091844	protein_coding	-2.46949	0
ENSG00000091879	protein_coding	#N/A	0
ENSG00000091947	protein_coding	1.55492	0
ENSG00000091972	protein_coding	#N/A	0
ENSG00000091986	protein_coding	-0.159199	2
ENSG00000092009	protein_coding	#N/A	0
ENSG00000092010	protein_coding	1.00107	0
ENSG00000092020	protein_coding	-1.12769	0
ENSG00000092036	protein_coding	-1.13511	0
ENSG00000092051	protein_coding	#N/A	0
ENSG00000092054	protein_coding	#N/A	0
ENSG00000092067	protein_coding	#N/A	0
ENSG00000092068	protein_coding	#N/A	0
ENSG00000092094	protein_coding	-1.59466	0
ENSG00000092096	protein_coding	0.652077	0
ENSG00000092098	protein_coding	-1.56181	0
ENSG00000092108	protein_coding	-1.04215	0
ENSG00000092140	protein_coding	-1.2577	0
ENSG00000092148	protein_coding	-1.93943	5
ENSG00000092199	protein_coding	-0.502509	0
ENSG00000092200	protein_coding	#N/A	0
ENSG00000092201	protein_coding	-1.07359	1
ENSG00000092203	protein_coding	0.239593	0
ENSG00000092208	protein_coding	-0.664617	0
ENSG00000092295	protein_coding	#N/A	0
ENSG00000092330	protein_coding	-1.145	3
ENSG00000092345	protein_coding	#N/A	0
ENSG00000092377	protein_coding	#N/A	0
ENSG00000092421	protein_coding	-0.237039	6
ENSG00000092439	protein_coding	-3.11	0
ENSG00000092445	protein_coding	-1.25921	0
ENSG00000092470	protein_coding	-0.413315	0
ENSG00000092529	protein_coding	#N/A	0
ENSG00000092531	protein_coding	1.08913	0
ENSG00000092607	protein_coding	#N/A	0
ENSG00000092621	protein_coding	-0.0383308	0
ENSG00000092758	protein_coding	#N/A	0
ENSG00000092820	protein_coding	0.660432	1
ENSG00000092841	protein_coding	0.380325	0
ENSG00000092847	protein_coding	-0.744452	0
ENSG00000092850	protein_coding	#N/A	0
ENSG00000092853	protein_coding	-0.756909	6
ENSG00000092871	protein_coding	0.344446	2
ENSG00000092929	protein_coding	#N/A	0
ENSG00000092931	protein_coding	-0.310701	1
ENSG00000092964	protein_coding	1.86982	0
ENSG00000092969	protein_coding	#N/A	0
ENSG00000092978	protein_coding	-1.66789	3
ENSG00000093000	protein_coding	-0.830498	5
ENSG00000093009	protein_coding	-0.75829	0
ENSG00000093010	protein_coding	0.889929	0
ENSG00000093072	protein_coding	#N/A	0
ENSG00000093134	protein_coding	#N/A	0
ENSG00000093144	protein_coding	0.0454067	0
ENSG00000093167	protein_coding	-1.81765	0
ENSG00000093183	protein_coding	-1.08351	2
ENSG00000093217	protein_coding	-2.00624	0
ENSG00000094631	protein_coding	-1.15421	2
ENSG00000094661	protein_coding	#N/A	0
ENSG00000094755	protein_coding	#N/A	0
ENSG00000094796	protein_coding	#N/A	0
ENSG00000094804	protein_coding	-0.678381	0
ENSG00000094841	protein_coding	-0.11011	0
ENSG00000094880	protein_coding	0.234687	0
ENSG00000094914	protein_coding	0.462598	0
[truncated: 17,934 more rows]

## Sheet: B-all mRNAs length 
Gene_info V107		longest length (kb)
geneID	geneType	total	5'UTR	CDS	3'UTR
ENSG00000000003	protein coding	3.796	0.312	0.738	2.879
ENSG00000000005	protein coding	1.205	0.083	0.954	0.168
ENSG00000000419	protein coding	3.004	0.4	0.888	0.37
ENSG00000000457	protein coding	6.308	0.261	2.229	4.082
ENSG00000000460	protein coding	4.355	0.575	2.562	1.291
ENSG00000000938	protein coding	2.637	0.195	1.59	0.85
ENSG00000000971	protein coding	6.985	0.364	3.696	0.491
ENSG00000001036	protein coding	2.385	0.086	1.404	0.895
ENSG00000001084	protein coding	3.785	1.273	1.92	1.415
ENSG00000001167	protein coding	6.209	0.111	1.044	4.993
ENSG00000001460	protein coding	6.016	0.187	1.005	1.544
ENSG00000001461	protein coding	5.481	0.35	1.221	3.791
ENSG00000001497	protein coding	7.57	0.112	2.205	3.006
ENSG00000001561	protein coding	4.644	0.201	1.362	3.048
ENSG00000001617	protein coding	3.607	0.506	2.358	0.96
ENSG00000001626	protein coding	6.223	0.233	4.443	2
ENSG00000001629	protein coding	6.34	0.546	3.27	2.434
ENSG00000001630	protein coding	3.155	0.139	1.53	1.512
ENSG00000001631	protein coding	6.688	3.036	2.211	1.767
ENSG00000002016	protein coding	3.023	0.245	1.257	1.655
ENSG00000002330	protein coding	1.157	0.271	0.507	0.379
ENSG00000002549	protein coding	2.209	0.268	1.56	0.381
ENSG00000002586	protein coding	1.278	0.174	0.558	0.522
ENSG00000002587	protein coding	7.16	0.196	0.924	5.932
ENSG00000002726	protein coding	3.135	0.337	2.313	0.295
ENSG00000002745	protein coding	3.15	0.293	1.098	1.759
ENSG00000002746	protein coding	9.453	0.293	4.821	4.075
ENSG00000002822	protein coding	2.991	0.462	2.157	0.276
ENSG00000002834	protein coding	4.023	0.4	0.786	2.992
ENSG00000002919	protein coding	2.992	0.29	0.813	2.093
ENSG00000002933	protein coding	2.065	0.566	0.708	0.292
ENSG00000003056	protein coding	2.45	0.444	0.834	1.578
ENSG00000003096	protein coding	5.331	0.91	1.977	1.095
ENSG00000003137	protein coding	4.556	0.144	1.539	2.989
ENSG00000003147	protein coding	2.44	0.248	1.539	0.739
ENSG00000003249	protein coding	2.889	0.732	0.537	1.464
ENSG00000003393	protein coding	9.251	0.9	5.076	3.967
ENSG00000003400	protein coding	5.668	0.437	1.569	3.924
ENSG00000003402	protein coding	14.612	0.411	1.443	12.714
ENSG00000003436	protein coding	7.69	0.293	0.915	2.706
ENSG00000003509	protein coding	2.974	0.148	1.326	0.81
ENSG00000003756	protein coding	5.616	0.214	2.448	2.12
ENSG00000003987	protein coding	5.11	0.059	1.983	3.068
ENSG00000003989	protein coding	7.638	0.15	2.097	5.427
ENSG00000004059	protein coding	1.509	0.096	0.543	0.401
ENSG00000004139	protein coding	10.277	0.339	2.175	7.763
ENSG00000004142	protein coding	2.67	0.079	1.107	1.484
ENSG00000004399	protein coding	6.913	0.087	5.778	1.211
ENSG00000004455	protein coding	7.687	0.176	0.72	5.195
ENSG00000004468	protein coding	5.62	0.14	0.903	4.63
ENSG00000004478	protein coding	3.715	0.284	1.38	2.165
ENSG00000004487	protein coding	5.786	0.154	2.637	2.859
ENSG00000004534	protein coding	4.324	0.624	3.372	0.51
ENSG00000004660	protein coding	3.898	0.115	1.599	1.896
ENSG00000004700	protein coding	3.745	0.466	1.95	1.284
ENSG00000004766	protein coding	5.736	0.161	2.895	2.687
ENSG00000004776	protein coding	1.46	0.172	0.483	0.956
ENSG00000004777	protein coding	4.352	0.15	3.864	0.393
ENSG00000004779	protein coding	0.885	0.268	0.471	0.413
ENSG00000004799	protein coding	3.601	0.223	1.236	2.142
ENSG00000004809	protein coding	2.033	0.265	1.734	0.669
ENSG00000004838	protein coding	1.774	0.187	1.323	0.298
ENSG00000004846	protein coding	5.35	0.306	3.774	1.384
ENSG00000004848	protein coding	2.893	0.228	1.689	0.976
ENSG00000004864	protein coding	3.192	0.191	2.031	0.971
ENSG00000004866	protein coding	2.899	0.412	1.758	1.018
ENSG00000004897	protein coding	5.83	0.123	2.493	3.232
ENSG00000004939	protein coding	4.954	0.082	2.736	2.068
ENSG00000004948	protein coding	3.829	0.442	1.473	1.87
ENSG00000004961	protein coding	2.312	0.187	0.807	1.276
ENSG00000004975	protein coding	2.989	0.255	2.211	0.523
ENSG00000005001	protein coding	1.383	0.066	0.954	0.363
ENSG00000005007	protein coding	5.321	0.251	3.39	1.71
ENSG00000005020	protein coding	3.839	0.161	1.08	2.589
ENSG00000005022	protein coding	1.307	0.072	0.897	0.338
ENSG00000005059	protein coding	2.23	0.092	1.011	1.127
ENSG00000005073	protein coding	2.669	0.088	0.942	1.639
ENSG00000005075	protein coding	0.937	0.062	0.354	0.521
ENSG00000005100	protein coding	5.535	0.123	2.124	3.288
ENSG00000005102	protein coding	2.674	0.388	0.765	1.521
ENSG00000005108	protein coding	10.655	0.252	4.974	5.429
ENSG00000005156	protein coding	8.382	0.144	3.03	5.237
ENSG00000005175	protein coding	4.339	0.141	1.998	2.256
ENSG00000005187	protein coding	3.311	0.586	1.761	0.609
ENSG00000005189	protein coding	2.691	0.277	2.325	0.241
ENSG00000005194	protein coding	2.021	0.169	0.939	0.983
ENSG00000005206	protein coding	3.691	0.123	1.779	1.886
ENSG00000005238	protein coding	5.771	2.981	1.617	1.109
ENSG00000005243	protein coding	0.914	0.075	0.633	0.506
ENSG00000005249	protein coding	3.689	0.203	1.257	2.229
ENSG00000005302	protein coding	6.544	0.456	1.566	2.698
ENSG00000005339	protein coding	10.79	0.797	7.329	2.664
ENSG00000005379	protein coding	7.698	0.875	5.574	1.217
ENSG00000005381	protein coding	3.216	0.177	2.238	0.994
ENSG00000005421	protein coding	2.393	0.057	1.068	1.268
ENSG00000005436	protein coding	4.367	0.13	2.346	2.076
ENSG00000005448	protein coding	2.356	0.087	1.005	0.097
ENSG00000005469	protein coding	3.205	0.104	1.923	1.15
ENSG00000005471	protein coding	4.293	1.277	3.861	0.4
ENSG00000005483	protein coding	7.782	0.372	5.577	2.537
ENSG00000005486	protein coding	1.878	0.262	1.095	0.893
ENSG00000005513	protein coding	4.153	0.153	1.341	1.593
ENSG00000005700	protein coding	6.04	0.357	4.062	1.438
ENSG00000005801	protein coding	9.943	0.284	1.902	1.191
ENSG00000005810	protein coding	17.482	0.319	14.319	2.904
ENSG00000005812	protein coding	3.506	0.369	1.287	1.885
ENSG00000005844	protein coding	7.524	0.298	3.513	2.642
ENSG00000005882	protein coding	3.364	0.162	1.224	2.055
ENSG00000005884	protein coding	5.479	0.33	3.201	1.372
ENSG00000005889	protein coding	7.612	0.166	2.535	4.879
ENSG00000005893	protein coding	6.535	0.196	1.236	5.175
ENSG00000005961	protein coding	3.479	0.176	3.12	0.184
ENSG00000005981	protein coding	3.784	0.071	1.281	2.474
ENSG00000006007	protein coding	2.907	0.366	0.996	1.777
ENSG00000006015	protein coding	2.465	0.006	0.606	0.229
ENSG00000006016	protein coding	1.746	0.143	1.281	0.329
ENSG00000006025	protein coding	4.497	0.58	2.529	1.026
ENSG00000006042	protein coding	4.218	0.495	0.681	3.322
ENSG00000006047	protein coding	4.553	0.139	1.095	0.381
ENSG00000006059	protein coding	1.303	0.061	1.215	0.027
ENSG00000006062	protein coding	4.583	0.231	2.844	1.673
ENSG00000006071	protein coding	6.565	0.115	4.812	1.946
ENSG00000006116	protein coding	1.917	0.42	0.948	0.549
ENSG00000006118	protein coding	3.981	0.252	3.075	1.672
ENSG00000006125	protein coding	5.702	0.53	2.856	2.714
ENSG00000006128	protein coding	1.061	0.112	0.39	0.552
ENSG00000006194	protein coding	3.282	0.334	2.052	2.29
ENSG00000006210	protein coding	5.796	2.706	1.212	2.012
ENSG00000006282	protein coding	3.539	0.478	2.409	0.361
ENSG00000006283	protein coding	8.602	0.745	7.134	0.75
ENSG00000006327	protein coding	1.678	0.092	0.681	0.557
ENSG00000006377	protein coding	2.3	0.425	0.882	0.993
ENSG00000006432	protein coding	11.511	0.363	3.357	7.854
ENSG00000006451	protein coding	2.787	0.542	0.621	1.875
ENSG00000006453	protein coding	3.645	0.238	1.536	1.871
ENSG00000006459	protein coding	9.22	0.046	2.826	6.348
ENSG00000006468	protein coding	6.459	0.399	1.476	4.637
ENSG00000006530	protein coding	3.874	0.157	1.269	2.707
ENSG00000006534	protein coding	5.884	0.115	1.407	1.337
ENSG00000006555	protein coding	3.401	0.16	1.71	1.531
ENSG00000006576	protein coding	5.198	0.199	2.358	2.625
ENSG00000006606	protein coding	0.703	0.18	0.285	0.16
ENSG00000006607	protein coding	6.065	0.259	3.165	4.616
ENSG00000006611	protein coding	3.241	0.245	2.7	0.482
ENSG00000006625	protein coding	1.158	0.132	0.567	0.615
ENSG00000006634	protein coding	3.655	0.517	2.025	1.39
ENSG00000006638	protein coding	2.642	0.346	1.224	1.181
ENSG00000006652	protein coding	3.65	0.546	1.356	1.684
ENSG00000006659	protein coding	0.773	0.203	0.507	0.131
ENSG00000006695	protein coding	4.948	0.116	1.332	1.464
ENSG00000006704	protein coding	5.868	1.685	2.931	1.294
ENSG00000006712	protein coding	2.2	0.29	1.596	0.362
ENSG00000006715	protein coding	5.854	0.117	2.565	3.272
ENSG00000006740	protein coding	4.428	0.341	2.457	1.611
ENSG00000006744	protein coding	3.767	0.178	2.481	1.206
ENSG00000006747	protein coding	9.682	0.21	2.148	7.467
ENSG00000006756	protein coding	5.145	0.064	1.782	3.299
ENSG00000006757	protein coding	3.342	0.128	0.762	2.439
ENSG00000006788	protein coding	6.067	0.152	5.817	0.086
ENSG00000006831	protein coding	3.971	0.122	1.161	2.602
ENSG00000006837	protein coding	2.222	0.195	1.779	0.466
ENSG00000007001	protein coding	2.435	0.188	1.125	1.264
ENSG00000007038	protein coding	1.106	0.089	0.945	0.293
ENSG00000007047	protein coding	5.209	0.318	2.259	2.845
ENSG00000007062	protein coding	4.349	0.401	2.598	1.141
ENSG00000007080	protein coding	1.055	0.17	0.672	0.276
ENSG00000007129	protein coding	1.691	0.375	0.882	0.381
ENSG00000007168	protein coding	8.092	0.353	1.287	3.88
ENSG00000007171	protein coding	5.071	0.191	3.462	1.54
ENSG00000007174	protein coding	13.711	0.271	13.461	0.997
ENSG00000007202	protein coding	7.428	0.148	6.708	0.618
ENSG00000007216	protein coding	2.855	0.42	1.926	0.68
ENSG00000007237	protein coding	8.269	0.311	1.431	6.622
ENSG00000007255	protein coding	0.805	0.019	0.522	0.296
ENSG00000007264	protein coding	2.098	0.404	1.527	0.213
ENSG00000007306	protein coding	2.489	0.202	0.798	1.453
ENSG00000007312	protein coding	1.254	0.075	0.693	0.486
ENSG00000007314	protein coding	7.805	0.077	5.511	2.217
ENSG00000007341	protein coding	4.483	0.174	1.728	2.594
ENSG00000007350	protein coding	2.566	0.281	1.791	0.662
ENSG00000007372	protein coding	6.944	1.555	1.422	5.155
ENSG00000007376	protein coding	2.159	0.244	0.939	1.387
ENSG00000007384	protein coding	2.992	0.119	2.568	0.698
ENSG00000007392	protein coding	2.737	0.445	1.116	1.224
ENSG00000007402	protein coding	5.696	0.211	3.462	2.053
ENSG00000007516	protein coding	4.732	0.253	3.564	0.959
ENSG00000007520	protein coding	1.21	0.074	0.939	0.197
ENSG00000007541	protein coding	2.958	0.129	2.283	1.212
ENSG00000007545	protein coding	7.972	0.298	3.81	3.863
ENSG00000007866	protein coding	2.986	0.182	1.308	1.561
ENSG00000007908	protein coding	3.875	0.323	1.833	1.87
ENSG00000007923	protein coding	5.004	0.124	1.68	1.517
ENSG00000007933	protein coding	2.059	0.077	1.599	0.377
ENSG00000007944	protein coding	3.072	0.239	1.338	1.497
ENSG00000007952	protein coding	2.543	0.22	1.695	0.628
ENSG00000007968	protein coding	5.196	0.44	1.314	3.442
ENSG00000008018	protein coding	1.939	0.065	0.726	0.1
ENSG00000008056	protein coding	3.21	0.129	2.118	1.033
ENSG00000008083	protein coding	6.003	0.471	3.741	1.791
ENSG00000008086	protein coding	14.695	0.211	3.093	11.439
ENSG00000008118	protein coding	3.089	0.648	1.431	0.9
ENSG00000008128	protein coding	2.984	0.326	2.352	0.528
ENSG00000008130	protein coding	3.653	0.182	1.776	1.672
ENSG00000008196	protein coding	5.631	0.202	1.383	4.227
ENSG00000008197	protein coding	2.058	0.53	1.359	0.169
ENSG00000008226	protein coding	6.899	0.021	5.337	1.613
ENSG00000008256	protein coding	4.508	0.137	1.203	3.168
ENSG00000008277	protein coding	9.508	0.323	2.895	6.398
ENSG00000008282	protein coding	2.13	0.104	0.78	1.3
ENSG00000008283	protein coding	3.2	0.402	0.957	2.29
ENSG00000008294	protein coding	8.276	0.218	3.966	4.098
ENSG00000008300	protein coding	11.933	0.252	9.939	1.742
ENSG00000008311	protein coding	8.554	0.304	2.781	3.025
ENSG00000008323	protein coding	3.111	0.494	2.373	0.361
ENSG00000008324	protein coding	2.697	0.119	0.234	2.425
ENSG00000008382	protein coding	1.614	0.067	1.512	0.198
ENSG00000008394	protein coding	2.152	0.121	0.468	1.028
ENSG00000008405	protein coding	3.834	0.588	1.761	0.638
ENSG00000008438	protein coding	0.708	0.032	0.591	0.085
ENSG00000008441	protein coding	6.019	0.363	1.533	4.162
ENSG00000008513	protein coding	6.951	0.576	1.023	4.916
ENSG00000008516	protein coding	4.413	0.856	1.689	1.891
ENSG00000008517	protein coding	1.381	0.443	0.705	0.464
ENSG00000008710	protein coding	14.14	0.209	12.912	1.019
ENSG00000008735	protein coding	5.7	0.026	2.475	3.199
ENSG00000008838	protein coding	3.896	0.419	3.045	0.501
ENSG00000008853	protein coding	5.551	0.558	2.25	3.04
ENSG00000008869	protein coding	6.937	0.104	6.216	0.595
ENSG00000008952	protein coding	6.526	0.022	1.2	5.31
ENSG00000008988	protein coding	4.711	0.447	0.429	3.497
ENSG00000009307	protein coding	5.66	0.391	2.535	1.296
ENSG00000009335	protein coding	5.214	0.347	3.252	1.615
ENSG00000009413	protein coding	10.964	0.48	9.393	4.162
ENSG00000009694	protein coding	13.547	0.509	8.178	4.633
ENSG00000009709	protein coding	6.213	0.758	1.563	3.937
ENSG00000009724	protein coding	2.67	0.032	2.061	1.365
ENSG00000009765	protein coding	8.622	0.14	0.882	7.732
ENSG00000009780	protein coding	3.579	0.12	1.026	2.535
ENSG00000009790	protein coding	3.302	0.357	1.656	0.341
ENSG00000009830	protein coding	5.647	0.202	2.4	2.42
ENSG00000009844	protein coding	6.991	0.205	0.924	6.042
ENSG00000009950	protein coding	3.252	0.051	2.559	1.064
ENSG00000009954	protein coding	6.115	0.36	4.452	1.288
ENSG00000010017	protein coding	3.384	0.33	2.19	0.864
ENSG00000010030	protein coding	1.776	0.265	1.026	0.551
ENSG00000010072	protein coding	3.559	1.28	1.47	1.662
ENSG00000010165	protein coding	3.368	0.308	2.1	0.961
ENSG00000010219	protein coding	3.272	0.121	1.905	1.549
ENSG00000010244	protein coding	13.74	0.274	1.494	12.126
ENSG00000010256	protein coding	1.595	0.026	1.443	0.199
ENSG00000010270	protein coding	3.653	0.253	0.705	0.747
ENSG00000010278	protein coding	3.345	0.358	0.813	1.531
ENSG00000010282	protein coding	1.836	0.22	1.515	0.088
ENSG00000010292	protein coding	4.825	0.117	4.206	0.543
ENSG00000010295	protein coding	3.001	0.306	1.716	1.522
ENSG00000010310	protein coding	3.404	0.479	1.401	1.787
ENSG00000010318	protein coding	2.127	0.588	1.146	0.324
ENSG00000010319	protein coding	4.993	0.076	2.349	2.568
ENSG00000010322	protein coding	5.35	0.038	4.515	1.391
ENSG00000010327	protein coding	7.928	0.076	7.713	0.139
ENSG00000010361	protein coding	1.728	0.206	1.257	0.506
ENSG00000010379	protein coding	2.188	0.135	1.809	0.754
ENSG00000010404	protein coding	7.58	0.21	1.653	5.758
ENSG00000010438	protein coding	0.92	0.16	0.78	0.051
ENSG00000010539	protein coding	4.308	0.551	1.188	1.567
ENSG00000010610	protein coding	3.049	0.195	1.377	1.47
ENSG00000010626	protein coding	1.698	0.361	1.032	0.339
ENSG00000010671	protein coding	4.568	0.247	2.082	0.619
ENSG00000010704	protein coding	5.176	0.16	1.047	4.117
ENSG00000010803	protein coding	3.37	0.248	2.013	0.992
ENSG00000010810	protein coding	3.628	0.485	1.614	1.407
ENSG00000010818	protein coding	10.032	0.422	7.341	1.638
ENSG00000010932	protein coding	3.13	0.153	1.599	1.239
ENSG00000011007	protein coding	5.075	0.056	2.319	2.538
ENSG00000011009	protein coding	1.635	0.131	0.696	0.807
ENSG00000011021	protein coding	5.631	0.167	2.862	2.92
ENSG00000011028	protein coding	5.719	0.48	4.44	1.146
ENSG00000011052	protein coding	1.193	0.149	0.879	0.237
ENSG00000011083	protein coding	3.625	0.266	2.001	1.448
ENSG00000011105	protein coding	4.322	0.937	0.816	3.448
ENSG00000011114	protein coding	8.445	0.273	3.399	5.539
ENSG00000011132	protein coding	4.25	0.157	1.728	0.254
ENSG00000011143	protein coding	4.123	0.156	1.686	1.757
ENSG00000011198	protein coding	5.298	0.416	1.05	4.193
ENSG00000011201	protein coding	6.265	0.101	2.043	4.121
ENSG00000011243	protein coding	4.863	0.198	1.941	0.454
ENSG00000011258	protein coding	5.365	0.215	1.887	3.151
ENSG00000011260	protein coding	1.876	0.039	1.671	0.155
ENSG00000011275	protein coding	5.777	0.175	2.772	2.813
ENSG00000011295	protein coding	3.075	0.025	1.143	1.882
ENSG00000011304	protein coding	4.661	0.423	1.767	1.563
ENSG00000011332	protein coding	2.356	0.464	1.308	1.057
ENSG00000011347	protein coding	7.23	0.328	2.061	4.913
ENSG00000011376	protein coding	10.049	0.271	2.712	7.196
ENSG00000011405	protein coding	8.428	0.139	5.061	3.166
ENSG00000011422	protein coding	1.61	0.504	1.008	0.383
ENSG00000011426	protein coding	4.731	0.307	3.375	1.191
ENSG00000011451	protein coding	8.987	0.159	5.67	3.098
ENSG00000011454	protein coding	4.986	0.288	3.21	1.653
ENSG00000011465	protein coding	6.85	0.563	1.08	5.574
ENSG00000011478	protein coding	2.703	0.301	1.149	1.05
ENSG00000011485	protein coding	4.675	0.197	1.5	0.629
ENSG00000011523	protein coding	5.803	0.807	2.274	3.366
ENSG00000011566	protein coding	4.335	0.314	2.685	1.352
ENSG00000011590	protein coding	2.037	0.117	1.464	0.561
ENSG00000011600	protein coding	0.62	0.067	0.435	0.234
ENSG00000011638	protein coding	1.812	0.37	0.558	1.06
ENSG00000011677	protein coding	3.669	0.192	1.479	1.994
ENSG00000012048	protein coding	7.27	0.628	5.655	3.426
ENSG00000012061	protein coding	3.379	0.545	0.972	2.341
ENSG00000012124	protein coding	3.274	0.363	2.544	0.701
ENSG00000012171	protein coding	3.283	0.325	2.265	0.84
ENSG00000012174	protein coding	4.457	0.118	1.56	3.383
ENSG00000012211	protein coding	2.795	0.231	1.848	1.002
ENSG00000012223	protein coding	2.721	0.249	2.133	0.55
ENSG00000012232	protein coding	9.103	0.475	2.76	5.695
ENSG00000012504	protein coding	2.884	0.352	1.461	0.925
ENSG00000012660	protein coding	3.081	0.363	0.981	1.729
ENSG00000012779	protein coding	2.519	0.104	2.025	0.432
ENSG00000012817	protein coding	6.825	0.269	4.713	2.13
ENSG00000012822	protein coding	5.866	0.342	2.076	3.427
ENSG00000012963	protein coding	3.494	0.051	1.278	2.18
ENSG00000012983	protein coding	4.812	0.21	2.541	1.498
ENSG00000013016	protein coding	4.825	0.47	1.608	2.747
ENSG00000013275	protein coding	1.754	0.038	1.257	0.459
ENSG00000013288	protein coding	7.719	0.022	3.03	4.858
ENSG00000013293	protein coding	10.14	0.165	2.316	7.507
ENSG00000013297	protein coding	2.758	0.199	0.624	1.935
ENSG00000013306	protein coding	2.217	0.472	1.08	0.376
ENSG00000013364	protein coding	2.925	0.151	2.682	0.308
ENSG00000013374	protein coding	3.21	0.154	1.848	1.224
ENSG00000013375	protein coding	7.896	0.246	1.713	4.429
ENSG00000013392	protein coding	3.769	0.14	0.879	2.663
ENSG00000013441	protein coding	3.208	0.335	1.581	0.369
ENSG00000013503	protein coding	4.183	0.141	3.402	0.649
ENSG00000013523	protein coding	5.287	0.448	2.013	3.219
ENSG00000013561	protein coding	4.213	0.349	1.425	2.502
ENSG00000013563	protein coding	3.008	0.721	0.909	1.471
ENSG00000013573	protein coding	4.182	0.24	2.913	1.215
ENSG00000013583	protein coding	2.056	0.151	0.624	1.503
ENSG00000013588	protein coding	6.582	0.103	1.074	5.398
ENSG00000013619	protein coding	5.148	0.569	3.072	2.175
ENSG00000013725	protein coding	3.252	0.186	2.007	1.085
ENSG00000013810	protein coding	2.943	0.275	2.517	1.386
ENSG00000014123	protein coding	4.226	0.068	2.385	1.773
ENSG00000014138	protein coding	3.544	0.373	1.797	1.416
ENSG00000014164	protein coding	3.27	0.026	2.847	0.397
ENSG00000014216	protein coding	3.086	0.378	2.145	0.72
ENSG00000014257	protein coding	3.174	0.088	1.257	1.963
ENSG00000014641	protein coding	1.647	0.499	1.062	0.333
ENSG00000014824	protein coding	6.164	0.15	1.707	4.335
ENSG00000014914	protein coding	3.332	0.232	2.13	0.478
ENSG00000014919	protein coding	5.03	0.078	1.233	3.719
ENSG00000015133	protein coding	7.519	0.154	6.087	2.331
ENSG00000015153	protein coding	5.095	0.169	0.615	4.572
ENSG00000015171	protein coding	4.229	0.409	1.854	2.261
ENSG00000015285	protein coding	2.761	0.153	1.773	0.939
ENSG00000015413	protein coding	1.772	0.185	1.236	0.234
ENSG00000015475	protein coding	2.495	0.327	0.726	1.442
ENSG00000015479	protein coding	7.306	0.36	2.544	2.282
ENSG00000015520	protein coding	5.048	0.071	4.08	0.912
ENSG00000015532	protein coding	3.507	0.015	2.598	1.183
ENSG00000015568	protein coding	7.268	0.392	5.298	1.809
ENSG00000015592	protein coding	2.321	0.078	0.777	1.538
ENSG00000015676	protein coding	8.036	0.058	1.086	6.892
ENSG00000016082	protein coding	2.394	0.224	1.05	1.12
ENSG00000016391	protein coding	7.694	0.337	1.785	5.442
ENSG00000016402	protein coding	3.522	0.54	1.662	1.587
ENSG00000016490	protein coding	3.31	0.26	2.745	0.214
ENSG00000016602	protein coding	3.211	0.042	2.76	0.409
ENSG00000016864	protein coding	1.889	0.345	1.116	0.364
ENSG00000017260	protein coding	4.994	0.347	2.922	1.8
ENSG00000017427	protein coding	7.277	0.229	0.588	6.633
ENSG00000017483	protein coding	2.659	0.843	1.419	0.396
ENSG00000017797	protein coding	4.379	0.285	1.968	2.87
ENSG00000018189	protein coding	4.433	0.61	1.863	2.26
ENSG00000018236	protein coding	5.667	0.243	3.057	2.38
ENSG00000018280	protein coding	5.772	0.2	1.653	1.859
ENSG00000018408	protein coding	5.037	0.538	1.203	3.57
ENSG00000018510	protein coding	11.009	0.261	2.031	5.74
ENSG00000018610	protein coding	2.372	0.249	0.669	1.578
ENSG00000018625	protein coding	5.435	0.103	3.063	2.269
ENSG00000018699	protein coding	3.044	0.243	2.532	0.228
ENSG00000018869	protein coding	3.061	0.315	1.554	1.112
ENSG00000019102	protein coding	1.191	0.118	0.984	0.28
ENSG00000019144	protein coding	5.945	0.233	4.134	1.346
ENSG00000019169	protein coding	1.81	0.133	1.563	0.14
ENSG00000019186	protein coding	3.278	0.407	1.545	1.316
ENSG00000019485	protein coding	10.73	0.239	3.534	6.951
ENSG00000019505	protein coding	5.165	0.134	1.281	3.75
ENSG00000019549	protein coding	2.828	0.264	0.807	1.209
ENSG00000019582	protein coding	3.06	0.161	0.891	0.614
ENSG00000019991	protein coding	5.834	0.165	2.187	3.571
ENSG00000019995	protein coding	5.695	0.371	2.127	3.197
ENSG00000020129	protein coding	3.698	0.411	2.19	1.116
ENSG00000020181	protein coding	6.944	0.386	4.017	2.541
ENSG00000020256	protein coding	3.057	0.407	2.046	0.868
ENSG00000020426	protein coding	2.648	0.102	0.93	1.616
ENSG00000020577	protein coding	7.157	0.519	2.157	4.371
ENSG00000020633	protein coding	4.34	0.439	1.29	2.611
ENSG00000020922	protein coding	6.841	0.236	2.136	4.555
ENSG00000021300	protein coding	2.275	0.431	0.732	1.217
ENSG00000021355	protein coding	2.476	0.052	1.14	1.276
ENSG00000021461	protein coding	1.848	0.103	1.515	0.227
ENSG00000021488	protein coding	1.998	0.111	1.464	0.81
ENSG00000021574	protein coding	5.268	0.276	1.851	3.264
ENSG00000021645	protein coding	12.048	0.953	4.716	6.327
ENSG00000021762	protein coding	3.854	0.562	2.64	1.098
ENSG00000021776	protein coding	9.597	0.129	4.458	5.01
ENSG00000021826	protein coding	5.775	0.32	4.521	1.122
ENSG00000021852	protein coding	2.871	0.192	1.776	1.123
ENSG00000022267	protein coding	2.878	0.685	0.972	1.428
ENSG00000022277	protein coding	2.193	0.113	1.011	1.184
ENSG00000022355	protein coding	4.878	0.404	1.416	2.819
ENSG00000022556	protein coding	3.744	0.202	3.189	0.244
ENSG00000022567	protein coding	7.483	0.4	2.427	5.025
ENSG00000022840	protein coding	3.814	0.456	2.451	0.922
ENSG00000022976	protein coding	2.992	0.325	2.784	1.045
ENSG00000023041	protein coding	4.324	0.468	1.326	1.225
ENSG00000023171	protein coding	8.33	0.693	2.634	5.179
ENSG00000023191	protein coding	3.281	1.408	1.386	0.256
ENSG00000023228	protein coding	11.66	0.174	2.226	9.368
ENSG00000023287	protein coding	6.636	0.361	4.785	1.324
ENSG00000023318	protein coding	5.953	0.212	1.221	3.475
ENSG00000023330	protein coding	2.43	0.177	1.923	0.147
ENSG00000023445	protein coding	6.877	2.673	1.938	2.301
ENSG00000023516	protein coding	9.915	0.077	5.706	4.033
ENSG00000023572	protein coding	5.612	0.476	0.498	4.384
ENSG00000023608	protein coding	2.593	0.041	1.107	1.445
ENSG00000023697	protein coding	1.644	0.2	0.957	0.635
ENSG00000023734	protein coding	1.874	0.323	1.092	0.526
ENSG00000023839	protein coding	5.806	0.205	4.638	0.963
ENSG00000023892	protein coding	3.217	0.039	1.896	0.585
ENSG00000023902	protein coding	3.741	0.604	1.23	0.542
ENSG00000023909	protein coding	4.883	0.293	0.825	3.791
ENSG00000024048	protein coding	7.891	0.291	5.268	2.332
ENSG00000024422	protein coding	3.506	0.117	1.632	1.702
ENSG00000024526	protein coding	5.299	0.222	2.436	2.78
ENSG00000024862	protein coding	1.247	0.134	0.555	0.516
ENSG00000025039	protein coding	4.923	0.28	1.203	3.44
ENSG00000025156	protein coding	2.643	0.187	1.611	0.899
ENSG00000025293	protein coding	5.879	0.282	3.039	2.743
ENSG00000025423	protein coding	1.751	0.217	0.954	0.448
ENSG00000025434	protein coding	2.731	1.238	1.401	0.337
ENSG00000025708	protein coding	2.049	0.287	1.464	0.119
ENSG00000025770	protein coding	3.337	0.114	1.821	1.405
ENSG00000025772	protein coding	1.973	0.064	0.93	0.979
ENSG00000025796	protein coding	6.43	0.199	2.283	3.948
ENSG00000025800	protein coding	7.355	0.075	1.611	5.669
ENSG00000026025	protein coding	2.666	0.629	1.401	0.986
ENSG00000026036	protein coding	5.843	0.103	2.358	0.432
ENSG00000026103	protein coding	16.484	0.402	1.101	15.155
ENSG00000026297	protein coding	8.614	0.515	0.771	7.475
ENSG00000026508	protein coding	5.431	0.422	2.229	3.069
ENSG00000026559	protein coding	3.722	0.428	1.542	0.383
ENSG00000026652	protein coding	7.923	0.124	1.137	6.656
ENSG00000026751	protein coding	3.542	0.245	1.008	1.657
ENSG00000026950	protein coding	3.442	0.206	1.542	1.516
ENSG00000027001	protein coding	2.381	0.08	2.142	0.159
ENSG00000027075	protein coding	3.72	0.523	2.052	1.145
ENSG00000027644	protein coding	5.2	0.496	3.894	0.81
ENSG00000027697	protein coding	2.519	0.573	1.47	1.155
ENSG00000027847	protein coding	2.653	0.405	0.984	0.635
ENSG00000027869	protein coding	1.673	0.149	1.2	0.331
ENSG00000028116	protein coding	2.657	0.327	1.527	0.523
ENSG00000028137	protein coding	3.687	0.101	1.386	2.2
ENSG00000028203	protein coding	4.51	0.134	2.34	2.126
ENSG00000028277	protein coding	7.057	0.203	1.875	5.442
ENSG00000028310	protein coding	4.865	0.436	1.794	0.828
ENSG00000028528	protein coding	8.214	0.213	1.674	6.664
ENSG00000028839	protein coding	4.199	0.561	0.561	3.392
ENSG00000029153	protein coding	6.902	0.237	1.911	4.757
ENSG00000029363	protein coding	7.719	0.139	2.763	4.489
ENSG00000029364	protein coding	5.399	0.68	0.924	3.797
ENSG00000029534	protein coding	8.478	0.282	5.694	2.529
ENSG00000029559	protein coding	1.573	0.08	0.954	0.525
ENSG00000029639	protein coding	2.799	0.056	1.041	1.702
ENSG00000029725	protein coding	5.909	0.222	2.589	3.117
ENSG00000029993	protein coding	3.507	0.207	0.603	2.857
ENSG00000030066	protein coding	5.376	0.135	4.311	1.018
ENSG00000030110	protein coding	2.212	0.269	0.636	1.361
ENSG00000030304	protein coding	8.294	0.126	2.61	5.57
ENSG00000030419	protein coding	9.562	0.302	1.599	7.669
ENSG00000030582	protein coding	2.13	0.341	1.782	0.391
ENSG00000031003	protein coding	5.579	0.305	2.814	2.265
ENSG00000031081	protein coding	9.307	0.522	4.335	4.45
ENSG00000031691	protein coding	1.741	0.084	0.807	0.832
ENSG00000031698	protein coding	1.914	0.075	1.611	0.294
ENSG00000031823	protein coding	3.233	0.12	1.704	1.471
ENSG00000032219	protein coding	5.864	0.361	3.774	1.898
ENSG00000032389	protein coding	2.932	0.141	1.245	0.725
ENSG00000032444	protein coding	4.617	0.386	4.128	0.202
ENSG00000032742	protein coding	3.091	0.328	2.502	1.485
ENSG00000033011	protein coding	5.967	0.873	1.395	2.498
ENSG00000033030	protein coding	5.663	1.769	2.124	1.898
ENSG00000033050	protein coding	4.527	0.179	1.872	2.57
ENSG00000033100	protein coding	4.424	1.529	2.319	0.961
ENSG00000033122	protein coding	27.923	0.718	4.728	22.477
ENSG00000033170	protein coding	5.166	1.402	1.728	1.711
ENSG00000033178	protein coding	9.54	0.036	3.159	6.345
ENSG00000033327	protein coding	6.11	0.134	2.031	3.979
ENSG00000033627	protein coding	4.652	0.253	2.517	1.462
ENSG00000033800	protein coding	7.98	0.656	1.962	6.012
ENSG00000033867	protein coding	8.079	0.321	3.78	4.043
ENSG00000034053	protein coding	4.031	0.378	2.25	1.182
ENSG00000034152	protein coding	2.401	0.249	1.044	1.082
ENSG00000034239	protein coding	2.286	0.16	0.636	1.62
ENSG00000034510	protein coding	0.461	0.063	0.135	0.248
ENSG00000034533	protein coding	2.687	0.422	2.115	0.406
ENSG00000034677	protein coding	4.33	0.242	2.517	1.496
ENSG00000034693	protein coding	2.75	0.238	1.122	1.39
ENSG00000034713	protein coding	2.274	0.165	0.354	0.564
ENSG00000034971	protein coding	2.1	0.077	1.515	1.293
ENSG00000035115	protein coding	3.54	1.239	1.029	2.616
ENSG00000035141	protein coding	2.398	0.079	0.738	1.314
ENSG00000035403	protein coding	7.995	0.094	3.405	3.194
ENSG00000035499	protein coding	2.504	0.097	1.59	0.841
ENSG00000035664	protein coding	8.086	0.212	1.467	6.588
ENSG00000035681	protein coding	3.764	0.222	2.847	0.669
ENSG00000035687	protein coding	2.555	0.092	1.371	1.092
ENSG00000035720	protein coding	1.951	0.083	0.888	0.98
ENSG00000035862	protein coding	3.652	0.318	0.663	2.69
ENSG00000035928	protein coding	4.886	0.134	3.447	1.305
ENSG00000036054	protein coding	4.054	0.321	2.1	1.583
ENSG00000036257	protein coding	6.756	0.6	2.307	4.095
ENSG00000036448	protein coding	5.008	0.123	4.398	0.475
ENSG00000036473	protein coding	1.522	0.111	1.065	0.364
ENSG00000036530	protein coding	6.609	0.12	1.503	5.87
ENSG00000036549	protein coding	6.412	0.158	2.712	3.224
ENSG00000036565	protein coding	2.956	0.204	1.578	1.018
ENSG00000036672	protein coding	3.697	0.218	1.818	1.62
ENSG00000036828	protein coding	10.062	0.297	3.267	6.438
ENSG00000037042	protein coding	1.782	0.22	1.356	0.206
ENSG00000037241	protein coding	0.742	0.115	0.438	0.23
ENSG00000037280	protein coding	5.833	0.117	4.092	1.686
ENSG00000037474	protein coding	3.558	0.312	2.304	0.993
ENSG00000037637	protein coding	6.227	0.257	2.154	3.83
ENSG00000037749	protein coding	5.157	0.316	1.089	4.501
ENSG00000037757	protein coding	3.178	0.067	1.11	2.001
ENSG00000037897	protein coding	1.378	0.036	0.831	0.57
ENSG00000037965	protein coding	2.417	0.3	0.729	1.388
ENSG00000038002	protein coding	2.037	0.062	1.041	0.934
ENSG00000038210	protein coding	3.594	0.131	1.446	2.017
ENSG00000038219	protein coding	10.567	0.138	9.297	2.884
ENSG00000038274	protein coding	4.416	0.766	1.026	2.556
ENSG00000038295	protein coding	7.291	0.668	3.111	3.581
ENSG00000038358	protein coding	5.267	0.21	4.206	0.351
ENSG00000038382	protein coding	11.46	1.13	9.294	2.325
ENSG00000038427	protein coding	12.345	0.35	10.191	1.869
ENSG00000038532	protein coding	6.827	0.179	3.162	3.847
ENSG00000038945	protein coding	3.618	0.194	1.41	2.207
ENSG00000039068	protein coding	4.811	0.124	2.649	2.038
ENSG00000039123	protein coding	3.961	0.025	3.129	1.968
ENSG00000039139	protein coding	15.781	0.25	13.875	1.656
ENSG00000039319	protein coding	10.805	0.284	4.62	6.002
ENSG00000039523	protein coding	4.26	0.476	3.72	0.325
ENSG00000039537	protein coding	3.691	0.245	2.805	0.709
ENSG00000039560	protein coding	5.064	0.258	2.952	1.847
ENSG00000039600	protein coding	3.283	0.36	2.262	0.924
ENSG00000039650	protein coding	2.111	0.231	1.566	0.3
ENSG00000039987	protein coding	2.183	0.273	1.53	0.407
ENSG00000040199	protein coding	8.467	0.734	4.077	3.966
ENSG00000040275	protein coding	2.529	0.254	1.818	0.742
ENSG00000040341	protein coding	4.061	0.322	1.713	2.402
ENSG00000040487	protein coding	2.175	0.564	0.876	0.713
ENSG00000040531	protein coding	4.139	0.25	1.203	2.734
ENSG00000040608	protein coding	1.973	0.226	1.679	0.296
ENSG00000040633	protein coding	1.978	0.231	1.212	0.597
ENSG00000040731	protein coding	3.438	0.385	2.367	0.806
ENSG00000040933	protein coding	10.096	0.232	2.934	6.784
ENSG00000041353	protein coding	7.003	0.224	0.657	6.103
ENSG00000041357	protein coding	4.378	0.27	0.786	3.473
ENSG00000041515	protein coding	7.046	0.234	5.643	1.169
ENSG00000041802	protein coding	3.283	0.029	1.977	1.277
ENSG00000041880	protein coding	2.472	0.67	1.602	0.387
ENSG00000041982	protein coding	8.5	0.276	6.606	1.582
ENSG00000041988	protein coding	2.053	0.087	0.72	1.498
ENSG00000042062	protein coding	4.391	0.414	2.853	1.124
ENSG00000042088	protein coding	3.722	0.739	1.827	1.621
ENSG00000042286	protein coding	3.247	0.201	1.122	1.908
ENSG00000042317	protein coding	3.61	0.421	1.8	0.483
ENSG00000042429	protein coding	5.087	0.272	1.959	2.899
ENSG00000042445	protein coding	3.141	0.021	1.833	1.294
ENSG00000042493	protein coding	1.25	0.166	1.047	0.14
ENSG00000042753	protein coding	0.898	0.132	0.477	0.311
ENSG00000042781	protein coding	19.01	0.235	15.681	2.89
ENSG00000042813	protein coding	1.195	0.189	1.056	0.104
ENSG00000042832	protein coding	8.455	0.317	8.307	0.222
ENSG00000042980	protein coding	7.082	0.081	2.391	4.61
ENSG00000043039	protein coding	2.148	0.188	0.84	0.877
ENSG00000043093	protein coding	7.849	0.14	0.78	7.02
ENSG00000043143	protein coding	6.757	0.342	2.505	3.913
ENSG00000043355	protein coding	2.963	0.281	1.599	1.083
ENSG00000043462	protein coding	4.232	0.246	1.602	2.464
ENSG00000043514	protein coding	5.93	0.187	1.404	3.804
ENSG00000043591	protein coding	3.039	0.267	1.434	1.338
ENSG00000044012	protein coding	0.604	0.041	0.339	0.224
ENSG00000044090	protein coding	5.947	0.322	5.193	0.597
ENSG00000044115	protein coding	3.831	0.509	2.721	1.21
ENSG00000044446	protein coding	5.077	0.182	3.708	1.187
ENSG00000044459	protein coding	5.518	0.026	4.221	3.669
ENSG00000044524	protein coding	5.712	0.128	2.952	2.632
ENSG00000044574	protein coding	5.402	0.256	1.965	1.739
ENSG00000046604	protein coding	5.697	0.075	3.357	2.265
ENSG00000046647	protein coding	3.17	0.222	0.729	2.187
ENSG00000046651	protein coding	6.735	0.327	3.039	3.061
ENSG00000046653	protein coding	3.957	0.442	0.987	3.088
ENSG00000046774	protein coding	1.994	0.188	1.122	0.524
ENSG00000046889	protein coding	10.824	0.349	4.821	5.654
ENSG00000047056	protein coding	5.137	0.584	1.731	3.04
ENSG00000047188	protein coding	6.708	0.202	4.293	1.803
ENSG00000047230	protein coding	4.319	0.705	1.761	1.777
ENSG00000047249	protein coding	2.365	0.525	1.452	0.421
ENSG00000047315	protein coding	4.108	0.346	3.525	0.17
ENSG00000047346	protein coding	4.726	0.561	3.252	2.668
ENSG00000047365	protein coding	7.513	0.336	5.115	1.903
ENSG00000047410	protein coding	9.636	0.297	7.092	2.319
ENSG00000047457	protein coding	4.452	0.037	3.198	1.217
ENSG00000047578	protein coding	6.599	0.027	4.857	1.715
ENSG00000047579	protein coding	1.88	0.254	1.056	0.862
ENSG00000047597	protein coding	5.174	0.171	1.335	3.668
ENSG00000047617	protein coding	3.72	0.072	3.012	0.648
ENSG00000047621	protein coding	3.817	0.182	1.659	2.072
ENSG00000047634	protein coding	4.615	0.258	0.99	1.596
ENSG00000047644	protein coding	6.949	0.325	3.651	2.973
ENSG00000047648	protein coding	6.299	1.092	2.925	1.987
ENSG00000047662	protein coding	6.731	0.322	3.183	3.226
ENSG00000047849	protein coding	9.232	0.5	6.894	2.374
ENSG00000047932	protein coding	4.597	0.254	1.389	2.985
ENSG00000047936	protein coding	8.451	0.286	7.044	1.139
ENSG00000048028	protein coding	4.856	0.315	3.42	1.366
ENSG00000048052	protein coding	10.118	0.554	3.21	6.354
ENSG00000048140	protein coding	4.445	0.229	0.999	2.094
ENSG00000048162	protein coding	1.161	0.388	0.699	0.518
ENSG00000048342	protein coding	6.514	0.193	4.899	1.373
ENSG00000048392	protein coding	4.774	0.087	1.225	3.631
ENSG00000048405	protein coding	4.473	0.649	1.995	1.771
ENSG00000048462	protein coding	0.891	0.115	0.555	0.221
ENSG00000048471	protein coding	8.173	0.073	2.442	5.658
ENSG00000048540	protein coding	3.81	0.515	0.504	2.904
ENSG00000048544	protein coding	2.1	0.012	0.606	1.482
ENSG00000048545	protein coding	2.52	0.25	0.606	1.935
ENSG00000048649	protein coding	11.242	1.061	4.326	6.908
ENSG00000048707	protein coding	16.357	0.31	13.167	3.023
ENSG00000048740	protein coding	9.406	0.368	1.602	7.622
ENSG00000048828	protein coding	5.16	0.231	3.357	1.673
ENSG00000048991	protein coding	4.781	0.257	3.405	0.978
ENSG00000049089	protein coding	2.887	0.26	2.07	0.693
ENSG00000049130	protein coding	5.737	0.573	0.822	4.389
ENSG00000049167	protein coding	9.414	0.142	1.248	8.161
ENSG00000049192	protein coding	7.309	0.578	3.354	3.207
ENSG00000049239	protein coding	9.147	0.293	2.409	6.468
ENSG00000049245	protein coding	2.178	0.492	0.303	1.787
ENSG00000049246	protein coding	6.365	0.224	3.633	2.422
ENSG00000049247	protein coding	1.601	0.206	0.42	0.86
ENSG00000049249	protein coding	5.872	0.15	0.768	4.964
ENSG00000049283	protein coding	3.879	0.261	1.899	1.593
ENSG00000049323	protein coding	6.502	0.372	5.166	0.964
ENSG00000049449	protein coding	2.653	0.194	0.996	1.25
ENSG00000049540	protein coding	3.452	0.399	2.361	1.207
ENSG00000049541	protein coding	1.685	0.188	1.065	0.607
ENSG00000049618	protein coding	10.813	0.819	7.119	8.292
ENSG00000049656	protein coding	3.54	0.258	1.617	0.617
ENSG00000049759	protein coding	8.633	0.623	3.765	5.271
ENSG00000049768	protein coding	2.264	0.266	1.371	0.896
ENSG00000049769	protein coding	3.477	0.661	2.4	1
ENSG00000049860	protein coding	2.021	0.536	1.671	0.349
ENSG00000049883	protein coding	11.145	0.143	1.167	9.968
ENSG00000050030	protein coding	12.338	0.59	4.551	7.24
ENSG00000050130	protein coding	2.524	0.526	0.978	1.338
ENSG00000050165	protein coding	9.549	0.213	1.095	8.257
ENSG00000050327	protein coding	5.482	0.28	4.794	0.576
ENSG00000050344	protein coding	3.74	0.301	2.085	1.354
ENSG00000050393	protein coding	5.46	0.139	1.08	4.252
ENSG00000050405	protein coding	3.92	1.27	2.283	1.276
ENSG00000050426	protein coding	2.948	0.314	1.122	1.064
ENSG00000050438	protein coding	11.764	0.298	3.282	8.325
ENSG00000050555	protein coding	7.455	0.041	4.728	2.686
ENSG00000050628	protein coding	6.982	0.239	1.278	5.584
ENSG00000050730	protein coding	2.397	0.196	1.131	1.223
ENSG00000050748	protein coding	4.799	0.252	1.275	3.241
ENSG00000050767	protein coding	2.899	0.216	1.623	1.225
ENSG00000050820	protein coding	4.659	0.715	2.751	1.33
ENSG00000051009	protein coding	3.481	0.191	2.961	0.499
ENSG00000051108	protein coding	2.853	0.111	1.176	1.574
ENSG00000051128	protein coding	1.979	0.653	1.086	0.242
ENSG00000051180	protein coding	2.439	0.438	1.023	1.162
ENSG00000051341	protein coding	8.757	0.111	7.773	0.873
ENSG00000051382	protein coding	6.259	0.505	3.213	2.691
ENSG00000051523	protein coding	1.969	0.07	0.765	1.37
ENSG00000051596	protein coding	1.796	0.107	1.056	0.74
ENSG00000051620	protein coding	10.01	0.273	0.618	9.119
ENSG00000051825	protein coding	6.369	0.162	3.552	2.592
ENSG00000052126	protein coding	6.487	0.182	3.849	2.947
ENSG00000052344	protein coding	1.837	0.229	1.032	0.576
ENSG00000052723	protein coding	5.506	0.078	0.636	4.792
ENSG00000052749	protein coding	4.476	0.303	3.894	0.393
ENSG00000052795	protein coding	7.038	0.187	3.345	3.506
ENSG00000052802	protein coding	2.227	0.28	0.882	1.218
ENSG00000052841	protein coding	4.488	0.035	3.426	1.027
ENSG00000052850	protein coding	5.727	0.077	1.236	4.414
ENSG00000053108	protein coding	5.396	0.245	2.529	2.64
ENSG00000053254	protein coding	8.021	0.363	1.473	6.242
ENSG00000053328	protein coding	3.184	0.077	1.101	2.006
ENSG00000053371	protein coding	1.36	0.02	1.08	0.26
ENSG00000053372	protein coding	2.049	0.031	0.72	1.298
ENSG00000053438	protein coding	1.259	0.126	0.378	0.931
ENSG00000053501	protein coding	1.776	0.103	0.78	1.35
ENSG00000053524	protein coding	7.813	0.642	3.345	1.523
ENSG00000053702	protein coding	2.757	0.115	0.846	1.859
ENSG00000053747	protein coding	10.651	0.231	10.002	1.574
ENSG00000053770	protein coding	11.675	0.344	1.515	9.858
ENSG00000053900	protein coding	3.807	0.108	2.43	0.116
ENSG00000053918	protein coding	3.224	0.269	2.031	1.102
ENSG00000054116	protein coding	2.428	0.406	0.567	0.633
ENSG00000054118	protein coding	4.405	0.132	2.868	1.34
ENSG00000054148	protein coding	1.316	0.32	0.378	0.233
ENSG00000054179	protein coding	2.102	0.064	1.488	0.55
ENSG00000054219	protein coding	6.932	0.074	5.169	1.689
ENSG00000054267	protein coding	6.022	0.451	3.939	1.63
ENSG00000054277	protein coding	2.628	0.115	1.209	1.304
ENSG00000054282	protein coding	2.581	0.133	2.142	1.404
ENSG00000054356	protein coding	5.099	0.166	2.94	0.638
ENSG00000054392	protein coding	3.639	0.203	1.485	2.332
ENSG00000054523	protein coding	10.855	0.309	5.514	5.435
ENSG00000054598	protein coding	3.983	0.531	1.662	1.79
ENSG00000054611	protein coding	3.934	0.545	1.554	2.073
ENSG00000054654	protein coding	21.842	0.351	20.724	2.101
ENSG00000054690	protein coding	6.615	0.109	4.095	2.377
ENSG00000054793	protein coding	7.862	0.021	3.144	4.697
ENSG00000054796	protein coding	1.789	0.065	1.191	0.654
ENSG00000054803	protein coding	3.154	1.348	0.606	1.2
ENSG00000054938	protein coding	1.971	0.538	1.356	0.195
ENSG00000054965	protein coding	7.296	0.267	0.735	6.258
ENSG00000054967	protein coding	4.346	0.202	1.293	1.983
ENSG00000054983	protein coding	3.794	0.508	2.058	1.718
ENSG00000055044	protein coding	1.994	0.206	1.59	0.225
ENSG00000055070	protein coding	3.48	0.17	0.459	3.005
ENSG00000055118	protein coding	4.717	0.408	3.48	0.404
ENSG00000055130	protein coding	3.247	0.365	2.331	0.585
ENSG00000055147	protein coding	4.414	0.589	1.518	2.828
ENSG00000055163	protein coding	6.452	0.411	3.903	2.595
ENSG00000055208	protein coding	4.553	0.339	2.082	1.94
ENSG00000055211	protein coding	2.026	0.121	0.993	1.022
ENSG00000055332	protein coding	10.103	0.401	1.656	8.063
ENSG00000055483	protein coding	6.063	0.306	3.372	2.251
ENSG00000055609	protein coding	16.86	0.36	14.907	3.862
ENSG00000055732	protein coding	2.953	0.3	1.662	1.61
ENSG00000055813	protein coding	4.114	0.635	1.662	1.817
ENSG00000055917	protein coding	6.309	0.248	3.195	2.894
ENSG00000055950	protein coding	2.134	0.072	0.786	1.432
ENSG00000055955	protein coding	3.282	0.031	2.808	0.459
ENSG00000055957	protein coding	2.904	0.173	2.736	0.214
ENSG00000056050	protein coding	1.216	0.067	1.041	0.108
ENSG00000056097	protein coding	4.717	0.082	3.225	1.41
ENSG00000056277	protein coding	4.638	0.138	2.214	2.27
ENSG00000056291	protein coding	1.964	0.299	1.272	0.493
ENSG00000056487	protein coding	3.976	0.456	1.596	1.924
ENSG00000056558	protein coding	4.351	0.247	1.251	2.627
ENSG00000056586	protein coding	9.248	0.601	3.576	5.071
ENSG00000056736	protein coding	2.822	0.021	1.509	0.486
ENSG00000056972	protein coding	5.833	0.503	1.758	4.024
ENSG00000056998	protein coding	3.393	0.154	1.506	1.607
ENSG00000057019	protein coding	6.128	0.369	2.37	3.431
ENSG00000057149	protein coding	1.707	0.048	1.173	0.46
ENSG00000057252	protein coding	6.861	0.223	1.653	5.039
ENSG00000057294	protein coding	4.361	0.081	2.646	1.679
ENSG00000057468	protein coding	3.27	0.104	2.811	0.355
ENSG00000057593	protein coding	3.109	0.054	1.401	1.677
ENSG00000057608	protein coding	2.499	0.222	1.338	0.783
ENSG00000057657	protein coding	5.148	0.328	2.52	2.453
ENSG00000057663	protein coding	3.185	0.266	0.828	2.201
ENSG00000057704	protein coding	5.874	0.139	1.434	4.313
ENSG00000057757	protein coding	1.59	0.544	0.636	0.856
ENSG00000057935	protein coding	5.832	0.513	1.785	3.548
ENSG00000058056	protein coding	9.431	0.194	2.592	5.26
ENSG00000058063	protein coding	7.315	0.257	3.534	3.525
ENSG00000058085	protein coding	5.398	0.115	3.582	1.727
ENSG00000058091	protein coding	5.171	0.427	1.41	3.426
ENSG00000058262	protein coding	5.354	0.245	1.458	2.23
ENSG00000058272	protein coding	5.62	0.199	3.093	2.366
ENSG00000058335	protein coding	6.294	0.949	3.822	2.238
ENSG00000058404	protein coding	4.545	0.316	2.001	2.369
ENSG00000058453	protein coding	6.66	0.088	6.054	0.518
ENSG00000058600	protein coding	4.8	0.295	2.127	1.401
ENSG00000058668	protein coding	8.918	0.464	3.618	4.508
ENSG00000058673	protein coding	11.825	6.566	2.433	2.859
ENSG00000058729	protein coding	3.909	0.056	1.659	2.194
ENSG00000058799	protein coding	1.821	0.22	0.921	0.552
ENSG00000058804	protein coding	4.552	0.035	2.025	2.492
ENSG00000058866	protein coding	6.054	0.289	2.376	2.889
ENSG00000059122	protein coding	5.043	0.245	2.151	2.481
ENSG00000059145	protein coding	5.25	0.351	2.202	3.19
ENSG00000059377	protein coding	2.505	0.235	1.743	0.842
ENSG00000059378	protein coding	3.021	0.104	2.106	1.137
ENSG00000059573	protein coding	3.352	0.115	2.388	0.821
ENSG00000059588	protein coding	5.206	0.076	4.866	0.264
ENSG00000059691	protein coding	6.552	0.025	1.674	0.717
ENSG00000059728	protein coding	5.58	0.295	0.666	4.661
ENSG00000059758	protein coding	4.036	0.495	1.572	1.981
ENSG00000059769	protein coding	2.572	0.074	1.083	1.252
ENSG00000059804	protein coding	4.414	0.153	1.491	2.183
ENSG00000059915	protein coding	3.861	0.367	3.075	0.583
ENSG00000060069	protein coding	3.744	0.145	2.886	0.832
ENSG00000060138	protein coding	6.393	0.212	1.119	0.566
ENSG00000060140	protein coding	2.771	0.353	1.269	1.221
ENSG00000060237	protein coding	11.804	0.987	8.502	2.66
ENSG00000060339	protein coding	4.658	0.285	3.453	1.169
ENSG00000060491	protein coding	4.506	2.277	2.034	0.351
ENSG00000060558	protein coding	2.273	0.418	1.125	0.73
ENSG00000060566	protein coding	2.588	0.117	1.386	1.085
ENSG00000060642	protein coding	4.972	2.838	1.521	2.815
ENSG00000060656	protein coding	5.573	0.129	4.341	1.152
ENSG00000060688	protein coding	1.928	0.341	1.074	0.504
ENSG00000060709	protein coding	6.321	0.363	4.089	2.998
ENSG00000060718	protein coding	7.327	0.344	5.457	1.552
ENSG00000060749	protein coding	9.706	0.315	5.595	3.796
ENSG00000060762	protein coding	1.192	0.219	0.33	0.51
ENSG00000060971	protein coding	4.72	0.207	1.275	0.64
ENSG00000060982	protein coding	9.314	0.331	1.197	7.984
ENSG00000061273	protein coding	6.414	0.215	3.045	1.161
ENSG00000061337	protein coding	5.706	0.224	1.791	3.557
ENSG00000061455	protein coding	9.147	0.279	1.788	7.065
ENSG00000061492	protein coding	1.673	0.113	1.11	0.468
ENSG00000061656	protein coding	1.561	0.387	1.314	0.072
ENSG00000061676	protein coding	20.332	0.759	3.405	16.587
ENSG00000061794	protein coding	1.829	0.022	0.972	1.114
ENSG00000061918	protein coding	3.466	0.186	1.956	1.402
ENSG00000061936	protein coding	5.593	0.14	3.012	0.266
ENSG00000061938	protein coding	5.94	1.318	3.261	1.993
ENSG00000061987	protein coding	13.263	0.391	5.157	7.727
ENSG00000062038	protein coding	4.452	0.387	2.49	1.892
ENSG00000062096	protein coding	2.165	0.193	1.773	0.171
ENSG00000062194	protein coding	4.683	0.953	1.482	1.927
ENSG00000062282	protein coding	5.926	0.259	1.167	1.027
ENSG00000062370	protein coding	3.66	0.125	2.742	0.878
ENSG00000062485	protein coding	3.057	0.232	1.401	1.556
ENSG00000062524	protein coding	3.444	0.178	2.595	0.359
ENSG00000062582	protein coding	1.727	0.21	0.504	0.141
ENSG00000062598	protein coding	4.121	0.128	2.163	1.511
ENSG00000062650	protein coding	6.31	0.428	3.573	2.287
ENSG00000062716	protein coding	4.325	0.36	1.221	2.344
ENSG00000062725	protein coding	6.492	0.311	1.758	4.423
ENSG00000062822	protein coding	3.703	0.187	3.402	0.176
ENSG00000063015	protein coding	4.306	0.32	2.985	1.073
ENSG00000063046	protein coding	3.856	0.053	1.851	1.992
ENSG00000063127	protein coding	2.983	0.168	2.211	0.801
ENSG00000063169	protein coding	5.739	0.935	4.683	0.862
ENSG00000063176	protein coding	3.085	0.991	1.992	1.093
ENSG00000063177	protein coding	3.844	0.568	0.571	0.507
ENSG00000063180	protein coding	1.715	0.555	0.987	0.173
ENSG00000063241	protein coding	2.283	0.832	0.666	0.323
ENSG00000063244	protein coding	3.067	0.959	1.428	0.774
ENSG00000063245	protein coding	16.219	0.547	1.989	14.177
ENSG00000063322	protein coding	3.59	0.12	0.666	2.942
ENSG00000063438	protein coding	5.661	0.4	2.094	3.457
ENSG00000063515	protein coding	2.625	0.009	0.618	1.998
ENSG00000063587	protein coding	6.42	0.139	1.29	5.153
ENSG00000063601	protein coding	4.536	0.165	2.022	2.379
ENSG00000063660	protein coding	3.719	0.284	1.677	1.786
ENSG00000063761	protein coding	3.56	0.062	1.572	1.623
ENSG00000063854	protein coding	2.619	0.272	0.927	1.654
ENSG00000063978	protein coding	4.123	1.358	0.573	2.106
ENSG00000064012	protein coding	2.93	0.346	1.617	1.196
ENSG00000064042	protein coding	7.697	0.366	4.404	2.859
ENSG00000064102	protein coding	2.634	0.186	2.121	0.316
ENSG00000064115	protein coding	4.315	0.277	1.713	2.386
ENSG00000064195	protein coding	2.602	0.226	0.864	1.512
ENSG00000064199	protein coding	4.949	1.421	0.456	3.072
ENSG00000064201	protein coding	3.325	0.203	0.963	0.28
ENSG00000064205	protein coding	2.759	0.508	0.753	0.504
ENSG00000064218	protein coding	2.493	0.347	1.419	0.727
ENSG00000064225	protein coding	3.571	0.308	0.996	2.171
ENSG00000064270	protein coding	3.6	0.089	2.928	0.455
ENSG00000064300	protein coding	3.408	0.474	1.284	1.999
ENSG00000064309	protein coding	9.138	0.288	3.864	5.146
ENSG00000064313	protein coding	7.061	0.299	3.756	2.266
ENSG00000064393	protein coding	15.329	0.375	3.597	11.357
ENSG00000064419	protein coding	4.514	0.443	2.874	1.206
ENSG00000064489	protein coding	1.804	0.089	1.149	0.454
ENSG00000064490	protein coding	1.376	0.457	0.783	0.218
ENSG00000064545	protein coding	2.251	0.098	1.44	0.761
ENSG00000064547	protein coding	2.546	0.503	1.047	0.601
ENSG00000064601	protein coding	6.632	1.182	1.497	1.145
ENSG00000064607	protein coding	6.189	0.387	3.291	2.848
ENSG00000064651	protein coding	6.874	0.189	3.639	3.046
ENSG00000064652	protein coding	1.987	0.116	0.609	1.456
ENSG00000064655	protein coding	2.612	0.364	1.617	0.711
ENSG00000064666	protein coding	2.266	0.25	0.993	1.168
ENSG00000064687	protein coding	6.883	0.16	6.441	0.523
ENSG00000064692	protein coding	4.986	1.304	3.051	1.069
ENSG00000064703	protein coding	7.416	0.15	2.475	4.024
ENSG00000064726	protein coding	3.194	0.101	1.449	1.644
ENSG00000064763	protein coding	7.106	0.358	1.548	1.967
ENSG00000064787	protein coding	6.112	0.381	1.89	4.681
ENSG00000064835	protein coding	1.566	0.122	0.954	0.49
ENSG00000064886	protein coding	2.169	0.615	1.173	0.27
ENSG00000064932	protein coding	4.906	0.453	4.101	0.583
ENSG00000064933	protein coding	3.417	0.509	2.799	1.172
ENSG00000064961	protein coding	2.434	0.333	0.954	0.562
ENSG00000064989	protein coding	6.112	0.422	1.386	4.22
ENSG00000064995	protein coding	4.924	0.114	0.636	1.259
ENSG00000064999	protein coding	6.35	1.754	3.585	2.797
ENSG00000065000	protein coding	5.065	0.232	3.648	1.185
ENSG00000065029	protein coding	4.651	0.405	1.713	2.233
ENSG00000065054	protein coding	2.16	0.16	1.014	1.042
ENSG00000065057	protein coding	1.067	0.019	0.939	0.227
ENSG00000065060	protein coding	9.567	0.168	4.323	5.076
ENSG00000065135	protein coding	9.044	0.106	1.065	7.851
ENSG00000065150	protein coding	6.002	0.367	3.348	2.474
ENSG00000065154	protein coding	2.039	0.215	1.32	0.639
ENSG00000065183	protein coding	10.004	0.063	2.832	7.096
ENSG00000065243	protein coding	6.07	0.359	2.955	2.807
ENSG00000065268	protein coding	1.521	0.022	1.299	0.345
ENSG00000065308	protein coding	7.047	0.145	1.113	5.789
ENSG00000065320	protein coding	5.986	0.076	1.815	4.032
ENSG00000065325	protein coding	4.196	0.16	1.662	2.394
ENSG00000065328	protein coding	4.587	0.233	2.628	1.944
ENSG00000065357	protein coding	5.436	0.335	2.208	0.343
ENSG00000065361	protein coding	6.264	0.456	4.029	1.45
ENSG00000065371	protein coding	2.056	0.257	0.639	1.63
ENSG00000065413	protein coding	7.218	0.193	3.171	4.005
ENSG00000065427	protein coding	2.421	0.192	1.878	0.421
ENSG00000065457	protein coding	5.757	0.879	1.509	3.348
ENSG00000065485	protein coding	2.232	0.228	1.56	0.225
ENSG00000065491	protein coding	3.462	0.146	1.518	1.798
ENSG00000065518	protein coding	1.426	0.032	0.39	1.031
ENSG00000065526	protein coding	12.385	0.791	10.995	1.029
ENSG00000065534	protein coding	10.113	5.022	5.775	4.301
ENSG00000065548	protein coding	2.032	0.13	1.281	0.628
ENSG00000065559	protein coding	3.856	0.058	1.233	2.57
ENSG00000065600	protein coding	2.469	0.144	1.236	1.287
ENSG00000065609	protein coding	4.521	0.366	2.724	1.406
ENSG00000065613	protein coding	7.827	0.606	3.708	3.513
ENSG00000065615	protein coding	9.205	0.202	1.566	7.545
ENSG00000065618	protein coding	5.612	0.158	4.494	0.949
ENSG00000065621	protein coding	6.715	0.397	0.732	5.666
ENSG00000065665	protein coding	2.495	0.151	1.431	0.958
ENSG00000065675	protein coding	3.255	0.196	2.121	1.064
ENSG00000065717	protein coding	2.812	0.376	2.235	0.285
ENSG00000065802	protein coding	6.891	0.144	1.008	5.739
ENSG00000065809	protein coding	3.788	0.427	0.921	2.633
ENSG00000065833	protein coding	3.338	0.097	1.719	1.522
ENSG00000065882	protein coding	5.985	0.265	3.789	1.838
ENSG00000065883	protein coding	9.525	0.521	4.539	4.6
ENSG00000065911	protein coding	6.506	1.263	1.053	3.425
ENSG00000065923	protein coding	9.971	0.089	2.181	7.701
ENSG00000065970	protein coding	5.524	1.118	1.725	2.667
ENSG00000065978	protein coding	2.979	0.148	1.124	1.825
ENSG00000065989	protein coding	4.897	0.325	2.661	2.009
ENSG00000066027	protein coding	3.245	0.701	1.461	1.083
ENSG00000066032	protein coding	4.349	0.276	2.862	0.989
ENSG00000066044	protein coding	6.054	0.165	0.981	4.91
ENSG00000066056	protein coding	3.893	0.09	3.417	0.386
ENSG00000066084	protein coding	8.705	0.156	4.731	3.818
ENSG00000066117	protein coding	3.283	0.188	1.548	1.707
ENSG00000066135	protein coding	4.486	0.139	3.195	1.148
ENSG00000066136	protein coding	2.363	0.436	1.377	0.775
ENSG00000066185	protein coding	1.53	0.256	1.098	0.444
ENSG00000066230	protein coding	5.555	0.127	2.67	2.923
ENSG00000066248	protein coding	3.184	0.189	2.133	0.788
ENSG00000066279	protein coding	11.085	0.257	10.656	0.468
ENSG00000066294	protein coding	8.204	0.079	1.038	7.161
ENSG00000066322	protein coding	1.625	0.253	0.84	0.518
ENSG00000066336	protein coding	1.374	0.194	0.816	0.418
ENSG00000066379	protein coding	3.672	0.26	0.381	0.212
ENSG00000066382	protein coding	5.591	0.312	0.885	4.396
ENSG00000066405	protein coding	3.434	0.134	0.786	2.514
ENSG00000066422	protein coding	5.657	1.067	3.162	2.277
ENSG00000066427	protein coding	6.95	0.088	1.113	5.768
ENSG00000066455	protein coding	2.879	0.152	2.196	0.501
ENSG00000066468	protein coding	6.964	2.994	2.469	1.835
ENSG00000066557	protein coding	2.843	0.039	1.809	0.995
ENSG00000066583	protein coding	1.942	0.018	0.897	1.027
ENSG00000066629	protein coding	4.804	1.065	2.523	1.948
ENSG00000066651	protein coding	4.437	0.221	1.392	1.79
ENSG00000066654	protein coding	4.357	0.345	1.062	3.216
ENSG00000066697	protein coding	1.991	0.251	0.828	0.768
ENSG00000066735	protein coding	6.889	0.249	5.745	1.104
ENSG00000066739	protein coding	13.162	0.365	6.237	6.56
ENSG00000066777	protein coding	7.32	0.494	5.55	2.044
ENSG00000066813	protein coding	2.935	0.382	1.734	1.032
ENSG00000066827	protein coding	5.472	0.186	3.732	1.457
ENSG00000066855	protein coding	2.651	0.08	1.002	1.518
ENSG00000066923	protein coding	4.45	0.343	3.681	1.355
ENSG00000066926	protein coding	7.695	0.14	1.29	6.335
ENSG00000066933	protein coding	12.478	0.471	7.647	4.289
ENSG00000067048	protein coding	4.408	0.307	1.983	2.356
ENSG00000067057	protein coding	3.265	0.419	2.508	1.139
ENSG00000067064	protein coding	3.37	0.62	0.855	2.035
ENSG00000067066	protein coding	5.414	0.355	2.658	2.66
ENSG00000067082	protein coding	4.59	0.267	0.852	3.556
ENSG00000067113	protein coding	1.55	0.34	0.858	0.352
ENSG00000067141	protein coding	7.342	0.255	4.386	2.509
ENSG00000067167	protein coding	3.394	0.902	1.125	1.714
ENSG00000067177	protein coding	6.286	0.439	3.723	2.188
ENSG00000067182	protein coding	2.99	0.3	1.587	0.866
ENSG00000067191	protein coding	5.308	0.208	1.797	2.202
ENSG00000067208	protein coding	7.795	0.273	2.481	4.96
ENSG00000067221	protein coding	6.28	0.258	1.197	5.011
ENSG00000067225	protein coding	3.016	0.487	1.818	0.728
ENSG00000067248	protein coding	4.664	0.121	4.11	0.433
ENSG00000067334	protein coding	5.896	0.058	2.271	3.567
ENSG00000067365	protein coding	4.974	0.266	1.215	3.511
ENSG00000067369	protein coding	10.369	0.245	5.934	4.322
ENSG00000067445	protein coding	4.634	0.462	4.296	0.231
ENSG00000067533	protein coding	7.765	0.024	0.849	6.892
ENSG00000067560	protein coding	3.941	0.323	0.582	3.35
ENSG00000067596	protein coding	6.215	0.173	3.663	1.823
ENSG00000067606	protein coding	2.385	0.468	1.779	0.386
ENSG00000067646	protein coding	5.336	0.389	2.406	2.513
ENSG00000067704	protein coding	3.53	0.085	3.039	0.406
ENSG00000067715	protein coding	4.705	0.41	1.269	2.884
ENSG00000067798	protein coding	10.219	0.607	7.158	2.493
ENSG00000067829	protein coding	1.712	0.186	1.182	0.584
ENSG00000067836	protein coding	2.684	0.102	0.864	0.533
ENSG00000067840	protein coding	3.761	0.25	2.328	1.187
ENSG00000067842	protein coding	6.774	0.278	3.663	2.936
ENSG00000067900	protein coding	9.446	0.903	4.065	4.478
ENSG00000067955	protein coding	3.134	0.259	0.672	2.326
ENSG00000067992	protein coding	12.72	0.186	1.248	11.302
ENSG00000068001	protein coding	4.054	2.293	1.422	0.339
ENSG00000068024	protein coding	8.976	0.573	3.27	4.929
ENSG00000068028	protein coding	2.06	0.381	1.035	0.94
ENSG00000068078	protein coding	4.301	0.173	2.427	1.61
ENSG00000068079	protein coding	1.232	0.208	0.867	0.157
ENSG00000068097	protein coding	6.108	0.007	3.546	2.555
ENSG00000068120	protein coding	2.479	0.475	1.782	0.309
ENSG00000068137	protein coding	4.339	0.431	2.382	0.39
ENSG00000068305	protein coding	5.824	0.405	1.536	3.717
ENSG00000068308	protein coding	2.888	0.155	1.716	1.15
ENSG00000068323	protein coding	3.291	0.184	1.728	1.876
ENSG00000068354	protein coding	3.785	0.084	2.067	1.634
ENSG00000068366	protein coding	7.223	0.265	2.136	2.694
ENSG00000068383	protein coding	3	0.31	1.239	1.444
ENSG00000068394	protein coding	1.658	0.013	1.431	0.214
ENSG00000068400	protein coding	3.278	0.124	2.526	0.47
ENSG00000068438	protein coding	1.986	0.376	0.99	0.629
ENSG00000068489	protein coding	6.226	0.118	1.083	5.078
ENSG00000068615	protein coding	4.017	0.154	0.963	3.107
ENSG00000068650	protein coding	9.086	0.379	3.576	5.356
ENSG00000068654	protein coding	12.48	0.379	5.163	7.207
ENSG00000068697	protein coding	1.365	0.108	0.702	0.555
ENSG00000068724	protein coding	6.587	0.421	2.649	2.436
ENSG00000068745	protein coding	2.49	0.331	1.281	1.378
ENSG00000068781	protein coding	3.824	0.067	3.549	0.202
ENSG00000068784	protein coding	3.667	0.049	2.988	0.63
ENSG00000068796	protein coding	8.764	0.378	2.235	5.456
ENSG00000068831	protein coding	2.983	1.723	1.833	0.282
ENSG00000068878	protein coding	7.25	0.209	5.532	1.505
ENSG00000068885	protein coding	4.044	0.241	2.334	1.539
ENSG00000068903	protein coding	4.734	0.458	1.17	0.756
ENSG00000068912	protein coding	4.69	0.202	1.452	2.296
ENSG00000068971	protein coding	2.729	0.34	1.494	0.631
ENSG00000068976	protein coding	2.866	0.076	2.529	0.27
ENSG00000068985	protein coding	0.659	0.116	0.441	0.094
ENSG00000069011	protein coding	2.337	0.347	0.945	1.045
ENSG00000069018	protein coding	3.57	0.291	2.589	0.69
ENSG00000069020	protein coding	10.677	0.378	7.872	2.542
ENSG00000069122	protein coding	5.761	0.226	4.041	1.47
ENSG00000069188	protein coding	11.079	0.357	6.519	4.203
ENSG00000069206	protein coding	3.367	0.179	2.331	1.019
ENSG00000069248	protein coding	5.208	0.092	3.471	1.645
ENSG00000069275	protein coding	6.399	0.209	0.732	5.458
ENSG00000069329	protein coding	6.776	0.061	2.391	4.34
ENSG00000069345	protein coding	3.008	1.482	1.239	1.667
ENSG00000069399	protein coding	1.877	0.083	1.365	0.429
ENSG00000069424	protein coding	5.979	0.527	1.248	3.736
ENSG00000069431	protein coding	8.844	0.228	4.65	3.793
ENSG00000069482	protein coding	0.749	0.189	0.372	0.188
ENSG00000069493	protein coding	5.277	0.203	0.585	4.679
ENSG00000069509	protein coding	1.069	0.027	0.468	0.559
ENSG00000069535	protein coding	2.57	0.151	1.563	0.856
ENSG00000069667	protein coding	10.827	0.124	1.671	9.171
ENSG00000069696	protein coding	1.399	0.036	1.26	0.103
ENSG00000069702	protein coding	6.455	0.515	2.556	3.515
ENSG00000069764	protein coding	0.636	0.079	0.498	0.078
ENSG00000069812	protein coding	4.262	0.193	0.522	3.641
ENSG00000069849	protein coding	1.951	0.271	0.84	0.984
ENSG00000069869	protein coding	7.235	0.3	3.96	3.078
ENSG00000069943	protein coding	1.937	0.291	1.668	0.362
ENSG00000069956	protein coding	5.489	0.631	2.166	2.375
ENSG00000069966	protein coding	8.934	0.122	1.188	7.657
ENSG00000069974	protein coding	4.661	0.23	0.666	2.541
ENSG00000069998	protein coding	3.614	0.043	1.272	0.51
ENSG00000070010	protein coding	5.038	0.169	0.924	0.759
ENSG00000070018	protein coding	10.252	0.332	4.842	5.101
ENSG00000070019	protein coding	3.858	0.151	3.222	0.485
ENSG00000070031	protein coding	0.526	0.038	0.366	0.122
ENSG00000070047	protein coding	5.539	0.123	4.95	0.445
ENSG00000070061	protein coding	10.045	0.465	4.041	1.803
ENSG00000070081	protein coding	3.262	0.297	1.263	0.792
ENSG00000070087	protein coding	2.325	0.285	0.567	1.585
ENSG00000070159	protein coding	8.765	2.554	2.742	3.94
ENSG00000070182	protein coding	10.177	0.116	6.987	3.023
ENSG00000070190	protein coding	2.955	0.087	0.843	2.038
ENSG00000070193	protein coding	6.113	0.738	0.627	4.748
ENSG00000070214	protein coding	10.482	0.247	2.181	8.29
ENSG00000070269	protein coding	4.259	0.239	2.124	2.273
ENSG00000070366	protein coding	5.974	0.241	4.26	1.649
ENSG00000070367	protein coding	10.486	0.257	2.136	8.102
ENSG00000070371	protein coding	5.518	0.09	4.923	0.497
ENSG00000070388	protein coding	1.712	0.047	0.513	0.769
ENSG00000070404	protein coding	2.501	0.284	0.792	1.684
ENSG00000070413	protein coding	4.814	0.248	1.653	2.836
ENSG00000070423	protein coding	2.092	0.112	0.936	0.752
ENSG00000070444	protein coding	4.925	0.392	1.749	2.828
ENSG00000070476	protein coding	4.639	0.026	2.577	0.843
ENSG00000070495	protein coding	5.517	0.324	1.245	3.891
ENSG00000070501	protein coding	1.341	0.4	1.008	0.203
ENSG00000070526	protein coding	2.657	0.148	1.803	0.767
ENSG00000070540	protein coding	1.908	0.138	1.341	0.511
ENSG00000070601	protein coding	5.465	0.589	4.737	0.135
ENSG00000070610	protein coding	3.757	0.524	2.784	0.77
ENSG00000070614	protein coding	8.011	0.387	2.649	4.879
ENSG00000070669	protein coding	2.385	0.44	1.686	0.582
ENSG00000070718	protein coding	3.669	1.695	1.257	2.122
ENSG00000070729	protein coding	5.657	0.242	3.756	1.824
ENSG00000070731	protein coding	1.904	0.222	1.125	0.727
ENSG00000070748	protein coding	5.296	0.439	2.247	2.896
ENSG00000070756	protein coding	3.429	1.004	1.911	1.309
ENSG00000070759	protein coding	3.071	0.312	1.716	0.957
ENSG00000070761	protein coding	1.605	0.266	0.582	0.433
ENSG00000070770	protein coding	7.382	0.37	1.053	0.447
ENSG00000070778	protein coding	6.443	0.357	3.525	2.359
ENSG00000070785	protein coding	1.923	0.23	1.359	0.478
ENSG00000070808	protein coding	4.848	0.199	1.68	3.219
ENSG00000070814	protein coding	5.24	0.118	4.47	0.499
ENSG00000070831	protein coding	10.503	1.911	0.576	9.843
ENSG00000070882	protein coding	6.749	0.293	2.664	3.643
ENSG00000070886	protein coding	5.019	0.147	3.018	1.854
ENSG00000070915	protein coding	5.567	0.029	3.093	2.445
ENSG00000070950	protein coding	5.857	0.208	1.488	4.282
ENSG00000070961	protein coding	7.062	0.243	3.663	3.221
ENSG00000070985	protein coding	5.689	1.158	3.522	0.422
ENSG00000071051	protein coding	2.666	0.227	1.143	1.267
ENSG00000071054	protein coding	7.97	0.374	4.155	3.441
ENSG00000071073	protein coding	8.432	0.364	1.608	6.46
ENSG00000071082	protein coding	2.328	0.409	0.393	2.077
ENSG00000071127	protein coding	4.721	0.306	1.98	1.387
ENSG00000071189	protein coding	6.817	0.206	2.874	3.977
ENSG00000071203	protein coding	1.167	0.233	0.804	0.306
ENSG00000071205	protein coding	8.188	0.214	2.361	0.695
ENSG00000071242	protein coding	5.992	0.381	2.277	3.398
ENSG00000071243	protein coding	3.749	0.134	1.257	2.372
ENSG00000071246	protein coding	6.449	1.354	1.098	3.997
ENSG00000071282	protein coding	8.284	0.174	1.098	7.07
ENSG00000071462	protein coding	3.886	0.157	0.897	1.783
ENSG00000071537	protein coding	7.919	0.109	2.385	5.425
ENSG00000071539	protein coding	2.431	0.115	1.299	1.017
ENSG00000071553	protein coding	4.515	0.06	1.413	2.366
ENSG00000071564	protein coding	4.735	0.497	2.04	2.415
ENSG00000071575	protein coding	4.344	1.372	1.032	1.94
ENSG00000071626	protein coding	3.943	0.205	1.224	0.948
ENSG00000071655	protein coding	5.678	0.458	0.876	4.563
ENSG00000071677	protein coding	0.264	0	0.264	0
ENSG00000071794	protein coding	5.32	0.218	3.03	2.093
ENSG00000071859	protein coding	1.47	0.451	1.02	0.222
ENSG00000071889	protein coding	3.995	0.47	0.735	0.736
ENSG00000071894	protein coding	4.48	0.13	4.332	0.089
ENSG00000071909	protein coding	6.213	0.143	4.026	2.046
ENSG00000071967	protein coding	4.235	0.158	0.861	3.302
ENSG00000071991	protein coding	6.297	0.185	2.319	3.729
ENSG00000071994	protein coding	3.355	0.111	1.035	2.264
ENSG00000072041	protein coding	6.442	0.369	2.193	3.758
ENSG00000072042	protein coding	4.035	0.071	0.957	1.521
ENSG00000072062	protein coding	3.996	1.467	1.284	1.55
ENSG00000072071	protein coding	7.853	0.203	4.425	3.13
ENSG00000072080	protein coding	1.021	0.108	0.636	0.29
ENSG00000072110	protein coding	5.441	0.477	2.793	0.886
ENSG00000072121	protein coding	9.719	0.083	7.665	1.914
ENSG00000072133	protein coding	8.465	0.3	2.238	5.931
ENSG00000072134	protein coding	4.846	1.165	1.926	2.461
ENSG00000072135	protein coding	3.616	0.063	1.383	2.181
ENSG00000072163	protein coding	4.807	0.632	1.098	0.9
ENSG00000072182	protein coding	3.34	0.243	2.001	0.726
ENSG00000072195	protein coding	10.782	0.231	9.804	0.843
ENSG00000072201	protein coding	3.978	0.346	2.187	1.606
ENSG00000072210	protein coding	5.084	0.446	1.566	2.039
ENSG00000072274	protein coding	6.872	0.44	2.388	2.897
ENSG00000072310	protein coding	4.901	0.185	3.534	1.288
ENSG00000072315	protein coding	12.143	0.898	2.922	8.302
ENSG00000072364	protein coding	9.536	0.376	3.492	5.664
ENSG00000072401	protein coding	2.623	0.247	0.444	1.986
ENSG00000072415	protein coding	5.468	0.359	2.028	3.105
ENSG00000072422	protein coding	4.411	0.215	2.091	2.044
ENSG00000072501	protein coding	9.93	0.237	3.702	5.954
ENSG00000072506	protein coding	2.663	0.025	0.786	0.478
ENSG00000072518	protein coding	5.298	0.579	2.367	2.143
ENSG00000072571	protein coding	3.016	0.327	2.178	0.777
ENSG00000072609	protein coding	11.228	0.372	1.995	9.198
ENSG00000072657	protein coding	11.047	0.274	3.21	7.563
ENSG00000072682	protein coding	4.553	0.562	1.608	2.863
ENSG00000072694	protein coding	4.68	0.099	0.933	1.101
ENSG00000072736	protein coding	6.328	0.338	3.228	2.91
ENSG00000072756	protein coding	7.518	1.053	1.422	5.504
ENSG00000072778	protein coding	2.352	0.141	2.037	0.31
ENSG00000072786	protein coding	5.892	0.182	2.907	2.803
ENSG00000072803	protein coding	4.539	0.371	1.692	2.553
ENSG00000072818	protein coding	4.898	0.208	2.223	0.082
ENSG00000072832	protein coding	3.174	0.534	2.061	0.996
ENSG00000072840	protein coding	6.427	0.18	2.979	3.268
ENSG00000072849	protein coding	4.167	0.115	0.72	3.43
ENSG00000072858	protein coding	4.818	0.467	2.499	1.867
ENSG00000072864	protein coding	5.861	0.661	1.155	2.749
ENSG00000072952	protein coding	6.155	0.453	2.739	3.241
ENSG00000072954	protein coding	2.631	0.079	0.9	1.652
ENSG00000072958	protein coding	12.859	0.173	1.308	11.471
ENSG00000073008	protein coding	5.792	0.299	1.254	4.351
ENSG00000073050	protein coding	2.052	0.105	1.902	0.196
ENSG00000073060	protein coding	5.527	0.248	1.659	1.731
ENSG00000073067	protein coding	2.361	0.031	1.473	1.112
ENSG00000073111	protein coding	3.434	0.287	2.715	0.663
ENSG00000073146	protein coding	3.957	0.305	3.636	1.203
ENSG00000073150	protein coding	3.052	0	2.034	1.464
ENSG00000073169	protein coding	2.283	0.026	2.01	0.247
ENSG00000073282	protein coding	4.944	0.142	2.043	2.774
ENSG00000073331	protein coding	5.633	0.162	3.735	2.134
ENSG00000073350	protein coding	3.553	0.438	3.063	0.331
ENSG00000073417	protein coding	4.664	0.307	2.49	1.242
ENSG00000073464	protein coding	6.759	0.263	2.307	4.076
ENSG00000073536	protein coding	5.286	0.306	1.458	3.707
ENSG00000073578	protein coding	3.001	0.053	1.995	0.662
ENSG00000073584	protein coding	8.466	0.882	1.236	3.823
ENSG00000073598	protein coding	1.352	0.079	0.975	0.298
ENSG00000073605	protein coding	4.655	0.224	1.251	0.217
ENSG00000073614	protein coding	10.701	0.229	5.073	5.399
ENSG00000073670	protein coding	4.614	0.212	2.31	2.092
ENSG00000073711	protein coding	6.743	0.44	3.453	2.728
ENSG00000073712	protein coding	6.001	0.355	2.064	1.109
ENSG00000073734	protein coding	6.934	0.1	3.966	2.841
ENSG00000073737	protein coding	2.863	0.72	1.14	0.4
ENSG00000073754	protein coding	2.204	0.107	1.044	1.053
ENSG00000073756	protein coding	4.709	0.219	1.815	2.972
ENSG00000073792	protein coding	4.283	0.082	1.818	2.401
ENSG00000073803	protein coding	9.857	0.233	2.901	6.638
ENSG00000073849	protein coding	4.893	0.402	1.221	2.75
ENSG00000073861	protein coding	2.583	0.219	1.608	0.756
ENSG00000073910	protein coding	13.017	0.496	9.177	3.665
ENSG00000073921	protein coding	4.134	0.317	1.959	1.871
ENSG00000073969	protein coding	3.983	0.227	2.235	1.641
ENSG00000074047	protein coding	7.136	0.418	4.761	3.173
ENSG00000074054	protein coding	8.141	0.285	4.68	3.085
ENSG00000074071	protein coding	1.04	0.031	0.678	0.331
ENSG00000074181	protein coding	8.68	0.09	6.966	1.624
ENSG00000074201	protein coding	2.982	0.08	0.714	2.166
ENSG00000074211	protein coding	4.538	0.385	1.344	2.724
ENSG00000074219	protein coding	2.44	0.363	1.356	0.729
ENSG00000074266	protein coding	2.767	0.887	1.506	0.74
ENSG00000074276	protein coding	4.509	0.259	3.933	0.302
ENSG00000074317	protein coding	1.407	0.277	0.405	0.729
ENSG00000074319	protein coding	2.101	0.135	1.173	0.868
ENSG00000074356	protein coding	12.772	0.023	1.863	10.886
ENSG00000074370	protein coding	4.826	0.173	3.159	1.563
ENSG00000074410	protein coding	6.098	0.126	1.065	4.907
ENSG00000074416	protein coding	4.271	0.865	0.942	3.136
ENSG00000074527	protein coding	3.621	0.455	1.887	1.279
ENSG00000074582	protein coding	2.015	0.65	1.26	0.187
ENSG00000074590	protein coding	5.744	0.301	1.986	3.457
ENSG00000074603	protein coding	8.699	1.581	2.697	4.421
ENSG00000074621	protein coding	5.762	0.363	3.3	2.181
ENSG00000074657	protein coding	6.696	0.567	3.906	2.014
ENSG00000074660	protein coding	3.428	0.047	2.493	1.753
ENSG00000074695	protein coding	4.824	0.021	1.533	3.27
ENSG00000074696	protein coding	3.228	0.301	1.203	1.97
ENSG00000074706	protein coding	6.842	0.234	1.317	5.332
ENSG00000074755	protein coding	11.466	0.135	8.886	2.445
ENSG00000074771	protein coding	1.98	0.039	1.707	0.207
ENSG00000074800	protein coding	2.548	0.379	1.305	0.423
ENSG00000074803	protein coding	8.632	0.209	3.438	1.193
ENSG00000074842	protein coding	0.99	0.028	0.57	0.46
ENSG00000074855	protein coding	4.618	0.185	3.699	1.038
ENSG00000074935	protein coding	3.61	0.075	1.428	0.749
ENSG00000074964	protein coding	4.625	0.253	3.84	1.021
ENSG00000074966	protein coding	2.908	0.129	1.584	1.244
ENSG00000075035	protein coding	5.082	0.639	1.758	2.194
ENSG00000075043	protein coding	9.247	0.214	2.619	6.436
ENSG00000075073	protein coding	2.715	0.595	1.197	0.923
ENSG00000075089	protein coding	2.045	0.987	1.191	0.638
ENSG00000075131	protein coding	1.728	0.327	0.906	0.798
ENSG00000075142	protein coding	1.972	0.079	0.597	1.363
ENSG00000075151	protein coding	7.832	1.807	5.688	1.027
ENSG00000075188	protein coding	2.362	0.426	0.981	1.251
ENSG00000075213	protein coding	8.113	0.265	2.316	5.594
ENSG00000075218	protein coding	2.983	0.062	2.22	0.68
ENSG00000075223	protein coding	4.874	0.356	2.256	2.356
ENSG00000075234	protein coding	2.566	0.079	1.41	1.124
ENSG00000075239	protein coding	2.258	0.208	1.305	1.51
ENSG00000075240	protein coding	4.5	0.18	1.737	2.539
ENSG00000075275	protein coding	11.839	0.45	9.06	2.818
ENSG00000075290	protein coding	2.144	0.16	1.056	0.928
ENSG00000075292	protein coding	6.821	0.528	5.937	0.397
ENSG00000075303	protein coding	4.056	0.265	1.017	2.681
ENSG00000075336	protein coding	3.084	0.286	0.747	2.051
ENSG00000075340	protein coding	9.29	0.327	2.181	6.641
ENSG00000075388	protein coding	3.165	0.257	0.621	2.287
ENSG00000075391	protein coding	14.453	2.982	4.251	10.908
ENSG00000075399	protein coding	2.791	0.343	1.896	0.727
ENSG00000075407	protein coding	8.738	0.294	1.686	6.707
ENSG00000075413	protein coding	6.433	0.656	2.391	1.985
ENSG00000075415	protein coding	6.087	0.354	1.089	4.851
ENSG00000075420	protein coding	8.031	0.194	3.615	4.194
ENSG00000075426	protein coding	6.713	0.863	0.981	4.869
ENSG00000075429	protein coding	10.576	0.134	0.828	9.511
ENSG00000075461	protein coding	3.583	0.205	0.984	2.394
ENSG00000075539	protein coding	11.692	0.202	9.042	2.065
ENSG00000075568	protein coding	7.476	0.286	5.652	0.763
ENSG00000075618	protein coding	2.784	0.35	1.482	1.181
ENSG00000075624	protein coding	2.554	0.292	1.128	1.339
ENSG00000075643	protein coding	6.182	0.043	2.667	3.472
ENSG00000075651	protein coding	6.015	0.165	3.225	2.674
ENSG00000075673	protein coding	4.406	0.336	3.138	0.95
ENSG00000075702	protein coding	5.973	0.281	4.572	1.638
ENSG00000075711	protein coding	5.972	0.451	2.781	3.221
ENSG00000075785	protein coding	3.182	0.35	0.654	2.099
ENSG00000075790	protein coding	2.911	0.305	1.047	2.115
ENSG00000075826	protein coding	5.087	0.091	3.54	1.149
ENSG00000075856	protein coding	4.154	0.246	2.946	1.243
ENSG00000075884	protein coding	2.968	0.102	1.428	2.374
ENSG00000075886	protein coding	1.52	0.081	1.353	0.086
ENSG00000075891	protein coding	4.189	0.841	1.254	2.399
ENSG00000075914	protein coding	1.647	0.034	0.876	0.132
ENSG00000075945	protein coding	4.111	1.414	2.379	0.35
ENSG00000075975	protein coding	5.191	0.419	1.284	3.539
ENSG00000076003	protein coding	3.753	0.078	2.466	1.209
ENSG00000076043	protein coding	1.088	0.063	0.714	0.425
ENSG00000076053	protein coding	6.725	0.642	0.804	6.21
ENSG00000076067	protein coding	8.488	0.204	1.224	7.054
ENSG00000076108	protein coding	8.938	0.325	5.718	3.022
ENSG00000076201	protein coding	5.237	0.086	4.911	1.759
ENSG00000076242	protein coding	2.827	0.314	2.271	0.371
ENSG00000076248	protein coding	2.868	0.209	0.942	2.123
ENSG00000076258	protein coding	2.303	0.231	1.677	0.245
ENSG00000076321	protein coding	3.414	0.098	1.83	1.445
ENSG00000076344	protein coding	4.294	0.103	1.404	1.083
ENSG00000076351	protein coding	6.492	0.474	1.38	5.014
ENSG00000076356	protein coding	11.508	0.742	5.685	5.001
ENSG00000076382	protein coding	3.786	0.079	3.582	0.451
ENSG00000076513	protein coding	4.241	0.259	1.773	2.209
ENSG00000076554	protein coding	4.339	0.378	0.744	3.371
ENSG00000076555	protein coding	9.368	0.662	7.377	1.864
ENSG00000076604	protein coding	2.894	0.522	1.413	1.379
ENSG00000076641	protein coding	10.744	0.478	1.299	8.734
ENSG00000076650	protein coding	3.191	0.295	2.796	0.382
ENSG00000076662	protein coding	2.491	0.452	1.644	0.831
ENSG00000076685	protein coding	4.917	0.617	1.71	2.724
ENSG00000076706	protein coding	4.865	0.029	1.941	1.357
ENSG00000076716	protein coding	4.959	0.524	1.671	2.764
ENSG00000076770	protein coding	12.302	0.703	1.065	10.346
ENSG00000076826	protein coding	4.179	0.14	3.831	0.247
ENSG00000076864	protein coding	4.294	0.174	2.247	1.044
ENSG00000076924	protein coding	4.555	0.018	2.568	0.061
ENSG00000076928	protein coding	3.54	0.106	2.952	0.496
ENSG00000076944	protein coding	2.812	0.329	1.815	0.18
ENSG00000076984	protein coding	3.43	0.102	1.308	2.047
ENSG00000077009	protein coding	1.16	0.214	0.708	0.288
ENSG00000077044	protein coding	6.308	0.079	3.645	2.734
ENSG00000077063	protein coding	5.904	0.139	4.992	0.92
ENSG00000077080	protein coding	1.524	0.141	1.281	0.149
ENSG00000077092	protein coding	4.897	0.636	1.368	4.542
ENSG00000077097	protein coding	7.848	0.61	4.881	1.526
ENSG00000077147	protein coding	6.25	0.177	1.77	4.153
ENSG00000077150	protein coding	3.411	0.491	2.703	0.148
ENSG00000077152	protein coding	1.719	0.13	0.594	0.294
ENSG00000077157	protein coding	15.431	0.355	3.132	12.146
ENSG00000077232	protein coding	21.051	0.229	2.382	17.344
ENSG00000077235	protein coding	7.09	0.023	6.33	0.737
ENSG00000077238	protein coding	3.624	0.309	2.478	1.652
ENSG00000077254	protein coding	4.502	0.21	2.829	1.484
ENSG00000077264	protein coding	9.126	0.344	1.743	6.914
ENSG00000077274	protein coding	3.532	0.113	1.926	1.478
ENSG00000077279	protein coding	9.406	0.393	1.101	7.936
ENSG00000077312	protein coding	1.277	0.206	0.849	0.222
ENSG00000077327	protein coding	2.77	0.319	1.53	0.978
ENSG00000077348	protein coding	2.272	0.031	0.774	0.262
ENSG00000077380	protein coding	4.354	0.219	1.917	2.269
ENSG00000077420	protein coding	2.633	0.202	2.001	0.761
ENSG00000077454	protein coding	4.754	0.029	2.052	1.096
ENSG00000077458	protein coding	3.932	0.613	1.02	2.698
ENSG00000077463	protein coding	1.6	0.128	1.068	0.838
ENSG00000077498	protein coding	2.062	0.079	1.59	0.393
ENSG00000077514	protein coding	3.788	0.433	1.401	2.31
ENSG00000077522	protein coding	10.302	0.245	2.685	2.135
ENSG00000077549	protein coding	6.18	0.416	0.906	5.109
ENSG00000077585	protein coding	2.033	0.118	1.2	0.749
ENSG00000077616	protein coding	3.466	0.303	2.223	1.147
ENSG00000077684	protein coding	5.695	0.373	2.529	2.962
ENSG00000077713	protein coding	2.699	0.068	1.026	1.413
ENSG00000077721	protein coding	2.643	0.218	0.675	1.17
ENSG00000077782	protein coding	6.216	0.854	2.679	2.734
ENSG00000077800	protein coding	3.265	0.268	0.984	2.257
ENSG00000077935	protein coding	4.233	0.052	3.708	0.493
ENSG00000077942	protein coding	2.904	0.212	2.166	0.709
ENSG00000077943	protein coding	6.547	0.151	3.192	3.204
ENSG00000077984	protein coding	0.891	0.237	0.438	0.216
ENSG00000078018	protein coding	10.012	0.335	5.973	3.721
ENSG00000078043	protein coding	11.243	0.233	1.866	9.215
ENSG00000078053	protein coding	3.224	0.069	2.088	1.114
ENSG00000078061	protein coding	2.378	0.059	1.821	0.621
ENSG00000078070	protein coding	2.874	0.756	2.178	0.347
ENSG00000078081	protein coding	3.196	0.276	1.251	1.866
ENSG00000078098	protein coding	2.696	0.167	2.283	0.397
ENSG00000078114	protein coding	8.925	0.354	3.045	5.951
ENSG00000078124	protein coding	7.333	0.196	0.825	6.47
ENSG00000078140	protein coding	5.153	0.219	0.603	4.358
ENSG00000078142	protein coding	9.415	0.062	2.664	6.693
ENSG00000078177	protein coding	9.747	0.181	5.313	4.06
ENSG00000078237	protein coding	8.209	0.994	0.813	7.337
ENSG00000078246	protein coding	3.08	0.097	1.506	1.694
ENSG00000078269	protein coding	7.402	0.379	4.491	2.812
ENSG00000078295	protein coding	9.908	0.159	3.276	3.21
ENSG00000078304	protein coding	4.63	0.185	1.74	2.717
ENSG00000078328	protein coding	4.884	0.969	1.749	2.717
ENSG00000078369	protein coding	3.163	0.298	1.023	1.769
ENSG00000078399	protein coding	2.064	0.08	0.819	1.165
ENSG00000078401	protein coding	2.035	0.269	0.639	1.127
ENSG00000078403	protein coding	5.681	0.493	3.207	1.692
ENSG00000078487	protein coding	2.364	0.248	1.95	0.302
ENSG00000078549	protein coding	6.639	0.371	1.575	4.795
ENSG00000078579	protein coding	1.84	0.313	0.636	0.891
ENSG00000078589	protein coding	3.517	0.164	1.02	2.187
ENSG00000078596	protein coding	1.698	0.337	0.792	0.705
ENSG00000078618	protein coding	3.895	0.19	3.66	0.045
ENSG00000078668	protein coding	1.418	0.305	0.855	0.475
ENSG00000078674	protein coding	8.652	0.201	6.075	2.286
ENSG00000078687	protein coding	10.391	0.566	5.835	3.977
ENSG00000078699	protein coding	7.803	0.97	1.845	5.39
ENSG00000078725	protein coding	3.171	0.38	2.286	0.455
ENSG00000078747	protein coding	6.743	0.482	2.712	3.979
ENSG00000078795	protein coding	2.333	1.227	1.875	0.689
ENSG00000078804	protein coding	4.127	0.174	0.663	3.132
ENSG00000078808	protein coding	3.516	0.174	1.068	0.874
ENSG00000078814	protein coding	6.551	0.14	5.949	0.249
ENSG00000078898	protein coding	1.788	0.057	1.377	0.32
ENSG00000078900	protein coding	5.192	0.234	1.911	3.439
ENSG00000078902	protein coding	3.666	0.207	0.825	2.668
ENSG00000078967	protein coding	3.982	0.097	0.444	3.441
ENSG00000079101	protein coding	2.449	0.909	1.401	0.433
ENSG00000079102	protein coding	7.687	0.43	1.992	5.275
ENSG00000079112	protein coding	3.67	0.106	2.499	1.078
ENSG00000079134	protein coding	2.791	0.031	1.974	0.401
ENSG00000079150	protein coding	4.455	0.101	0.669	2.243
ENSG00000079156	protein coding	10.652	0.195	2.88	7.334
ENSG00000079215	protein coding	6.868	0.68	1.77	2.266
ENSG00000079246	protein coding	3.761	0.346	2.199	1.101
ENSG00000079257	protein coding	1.071	0.17	0.669	0.277
ENSG00000079263	protein coding	3.244	0.17	2.604	0.531
ENSG00000079277	protein coding	3.408	0.168	1.398	1.354
ENSG00000079308	protein coding	10.68	0.3	5.583	4.871
ENSG00000079313	protein coding	4.609	0.205	3.666	0.818
ENSG00000079332	protein coding	5.981	0.342	0.597	5.187
ENSG00000079335	protein coding	4.231	0.488	1.875	1.997
ENSG00000079337	protein coding	6.3	0.324	2.772	3.204
ENSG00000079385	protein coding	3.491	0.107	1.581	1.915
ENSG00000079387	protein coding	4.967	0.433	1.935	2.487
ENSG00000079393	protein coding	1.778	0.218	1.005	0.445
ENSG00000079432	protein coding	8.299	0.685	7.554	0.606
ENSG00000079435	protein coding	3.768	0.587	3.231	0.298
ENSG00000079459	protein coding	2.66	0.507	1.431	0.695
ENSG00000079462	protein coding	1.098	0.341	0.696	0.045
ENSG00000079482	protein coding	7.569	0.701	2.409	4.82
ENSG00000079557	protein coding	1.997	0.031	1.8	0.126
ENSG00000079616	protein coding	4.673	0.491	2.04	1.029
ENSG00000079689	protein coding	1.468	0.203	0.831	0.568
ENSG00000079691	protein coding	5.485	0.422	4.116	0.947
ENSG00000079739	protein coding	2.657	0.368	1.755	0.59
ENSG00000079785	protein coding	5.418	0.402	2.223	1.786
ENSG00000079805	protein coding	5.651	0.164	2.613	0.856
ENSG00000079819	protein coding	4.456	2.494	3.018	1.252
ENSG00000079841	protein coding	7.984	0.474	5.079	2.436
ENSG00000079931	protein coding	2.989	0.228	1.842	1.794
ENSG00000079950	protein coding	15.845	0.192	0.786	14.891
ENSG00000079974	protein coding	2.597	0.277	0.717	1.897
ENSG00000079999	protein coding	2.648	0.3	1.875	0.527
ENSG00000080007	protein coding	2.43	0.078	1.947	0.38
ENSG00000080031	protein coding	3.923	0.068	3.348	0.507
ENSG00000080166	protein coding	5.074	0.427	1.659	3.087
ENSG00000080189	protein coding	5.82	0.452	1.185	4.414
ENSG00000080200	protein coding	10.779	0.196	8.913	1.67
ENSG00000080224	protein coding	16.254	0.163	3.393	12.831
ENSG00000080293	protein coding	2.275	0.257	1.323	0.274
ENSG00000080298	protein coding	9.307	0.292	2.25	6.745
ENSG00000080345	protein coding	15.003	0.483	7.419	7.101
ENSG00000080371	protein coding	15.558	0.267	0.678	14.613
ENSG00000080493	protein coding	7.716	0.443	3.285	4.296
ENSG00000080503	protein coding	7.061	0.52	4.773	5.971
ENSG00000080511	protein coding	1.714	0.189	0.996	0.53
ENSG00000080546	protein coding	5.664	0.773	1.656	3.235
ENSG00000080561	protein coding	7.333	0.561	2.208	4.564
ENSG00000080572	protein coding	1.882	0.279	0.645	1.068
ENSG00000080573	protein coding	6.207	0.119	5.238	0.85
ENSG00000080603	protein coding	11.724	0.253	9.693	1.676
ENSG00000080608	protein coding	2.187	0.051	1.947	0.179
ENSG00000080618	protein coding	5.585	0.024	1.272	4.942
ENSG00000080644	protein coding	3.015	0.501	1.518	1.295
ENSG00000080709	protein coding	3.594	0.943	2.574	0.318
ENSG00000080802	protein coding	4.642	0.239	2.142	2.643
ENSG00000080815	protein coding	11.342	0.461	1.431	4.547
ENSG00000080819	protein coding	2.709	0.144	1.365	1.237
ENSG00000080822	protein coding	2.818	0.862	0.831	1.179
ENSG00000080823	protein coding	3.809	0.74	1.26	1.255
ENSG00000080824	protein coding	3.51	0.295	2.565	0.97
ENSG00000080839	protein coding	5.686	0.069	3.207	2.41
ENSG00000080845	protein coding	5.058	0.822	2.979	1.606
ENSG00000080854	protein coding	17.159	0.214	4.314	12.631
ENSG00000080910	protein coding	1.498	0.826	1.068	0.542
ENSG00000080986	protein coding	2.126	0.127	1.929	0.568
ENSG00000081014	protein coding	6.743	0.256	3.414	3.233
ENSG00000081019	protein coding	6.621	0.064	2.409	4.148
ENSG00000081026	protein coding	6.874	0.519	4.446	3.027
ENSG00000081041	protein coding	1.115	0.075	0.324	0.716
ENSG00000081051	protein coding	2.426	0.042	1.869	0.544
ENSG00000081052	protein coding	9.984	0.199	5.073	4.611
ENSG00000081059	protein coding	5.34	0.328	1.446	2.025
ENSG00000081087	protein coding	5.024	0.451	1.041	3.432
ENSG00000081138	protein coding	12.136	0.498	2.358	9.443
ENSG00000081148	protein coding	8.352	0.203	3.726	4.423
ENSG00000081154	protein coding	2.285	0.086	0.537	1.781
ENSG00000081177	protein coding	5.107	0.38	1.866	2.92
ENSG00000081181	protein coding	1.911	0.058	1.065	0.788
ENSG00000081189	protein coding	7.281	0.512	1.452	5.487
ENSG00000081237	protein coding	7.205	0.242	3.921	1.378
ENSG00000081248	protein coding	6.307	0.112	5.622	0.571
ENSG00000081277	protein coding	5.447	0.251	2.244	2.92
ENSG00000081307	protein coding	4.692	0.687	1.386	3.268
ENSG00000081320	protein coding	5.273	0.278	1.119	3.864
ENSG00000081377	protein coding	5.602	0.465	1.497	3.682
ENSG00000081386	protein coding	6.507	0.475	2.052	4.225
ENSG00000081479	protein coding	15.657	0.135	13.968	1.554
ENSG00000081665	protein coding	4.14	0.148	1.335	1.841
ENSG00000081692	protein coding	3.749	0.138	1.254	1.201
ENSG00000081721	protein coding	1.33	0.075	1.023	0.453
ENSG00000081760	protein coding	6.646	0.151	2.019	1.087
ENSG00000081791	protein coding	4.907	0.087	1.548	3.288
ENSG00000081800	protein coding	3.798	0.138	1.788	1.987
ENSG00000081803	protein coding	6.065	0.74	3.891	1.754
ENSG00000081818	protein coding	3.806	0.181	2.388	1.237
ENSG00000081842	protein coding	5.395	0.134	2.853	2.41
ENSG00000081853	protein coding	4.813	0.212	2.799	1.859
ENSG00000081870	protein coding	0.894	0.145	0.645	0.522
ENSG00000081913	protein coding	6.299	0.143	5.154	1.002
ENSG00000081923	protein coding	6.161	0.469	3.756	2.27
ENSG00000081985	protein coding	5.443	0.604	2.589	2.635
ENSG00000082014	protein coding	2.415	0.376	1.452	1.229
ENSG00000082068	protein coding	5.716	0.083	1.965	0.862
ENSG00000082074	protein coding	4.829	0.34	2.52	2.191
ENSG00000082126	protein coding	2.436	0.137	1.914	0.34
ENSG00000082146	protein coding	2.222	0.205	1.257	0.818
ENSG00000082153	protein coding	6.511	0.401	1.356	5.16
ENSG00000082175	protein coding	13.037	0.743	2.802	9.492
ENSG00000082196	protein coding	3.773	0.088	0.96	2.725
ENSG00000082212	protein coding	9.031	0.229	1.755	7.073
ENSG00000082213	protein coding	3.572	0.106	1.329	2.151
ENSG00000082258	protein coding	6.92	0.62	2.193	4.694
ENSG00000082269	protein coding	6.215	0.282	4.548	1.768
ENSG00000082293	protein coding	8.74	0.222	3.429	5.194
ENSG00000082397	protein coding	6.962	0.398	3.264	2.822
ENSG00000082438	protein coding	9.367	0.431	3.702	5.758
ENSG00000082458	protein coding	6.112	0.367	2.55	3.221
ENSG00000082482	protein coding	3.875	0.649	1.281	1.945
ENSG00000082497	protein coding	5.222	0.216	1.071	3.918
ENSG00000082512	protein coding	4.958	0.059	1.674	2.244
ENSG00000082515	protein coding	3.173	0.049	0.699	2.514
ENSG00000082516	protein coding	5.404	0.078	4.527	0.799
ENSG00000082556	protein coding	4.954	0.375	1.23	3.573
ENSG00000082641	protein coding	4.839	0.512	2.319	1.904
ENSG00000082684	protein coding	4.933	0.489	3.618	1.108
ENSG00000082701	protein coding	7.743	1.013	1.413	5.467
ENSG00000082781	protein coding	4.44	0.365	2.4	1.675
ENSG00000082805	protein coding	9.308	0.255	3.363	5.703
ENSG00000082898	protein coding	8.93	1.448	3.216	1.525
ENSG00000082996	protein coding	2.866	0.584	1.146	1.035
ENSG00000083067	protein coding	12.32	0.267	5.16	6.893
ENSG00000083093	protein coding	5.177	1.053	3.561	0.495
ENSG00000083097	protein coding	7.995	0.114	7.431	0.304
ENSG00000083099	protein coding	5.347	0.033	0.297	5.049
ENSG00000083123	protein coding	3.668	0.047	1.179	2.466
ENSG00000083168	protein coding	9.254	0.73	6.021	2.726
ENSG00000083223	protein coding	5.724	0.551	4.488	0.944
ENSG00000083290	protein coding	9.149	0.519	3.111	5.519
ENSG00000083307	protein coding	5.232	0.331	1.878	3.023
ENSG00000083312	protein coding	11.04	0.426	2.697	8.001
ENSG00000083444	protein coding	2.976	0.086	2.184	0.729
ENSG00000083454	protein coding	2.126	0.211	1.335	0.641
ENSG00000083457	protein coding	3.803	0.044	3.54	0.219
ENSG00000083520	protein coding	10.571	0.492	2.877	7.626
ENSG00000083535	protein coding	3.08	0.217	2.274	0.542
ENSG00000083544	protein coding	3.388	0.801	2.235	0.471
ENSG00000083635	protein coding	3.48	0.035	1.488	1.957
ENSG00000083642	protein coding	7.472	0.142	4.344	2.967
ENSG00000083720	protein coding	3.294	0.214	1.563	1.664
ENSG00000083750	protein coding	2.051	0.579	1.125	0.431
ENSG00000083782	protein coding	1.482	0.08	0.969	0.474
ENSG00000083799	protein coding	8.54	0.15	2.871	5.427
ENSG00000083807	protein coding	5.032	0.153	2.073	1.294
ENSG00000083812	protein coding	5.653	0.703	1.662	3.282
ENSG00000083814	protein coding	2.903	0.096	1.605	1.947
ENSG00000083817	protein coding	2.545	0.207	1.785	0.553
ENSG00000083828	protein coding	2.695	0.224	1.209	2.217
ENSG00000083838	protein coding	3.922	2.18	1.353	0.761
ENSG00000083844	protein coding	12.163	0.414	1.884	9.865
ENSG00000083845	protein coding	1.747	0.849	0.678	0.056
ENSG00000083857	protein coding	14.776	0.369	13.767	0.798
ENSG00000083896	protein coding	6.233	0.337	2.208	3.712
ENSG00000083937	protein coding	5.984	0.283	0.69	1.734
ENSG00000084070	protein coding	2.905	0.394	1.29	1.225
ENSG00000084072	protein coding	4.651	0.407	0.945	3.414
ENSG00000084073	protein coding	3.357	0.231	1.428	1.73
ENSG00000084090	protein coding	3.377	0.393	1.113	1.871
ENSG00000084092	protein coding	2.218	0.021	2.097	0.1
ENSG00000084093	protein coding	7.371	0.398	3.294	6.004
ENSG00000084110	protein coding	3.892	0.328	1.974	1.57
ENSG00000084112	protein coding	13.034	0.146	3.15	9.797
ENSG00000084207	protein coding	1.681	0.102	0.633	0.216
ENSG00000084234	protein coding	3.742	0.141	2.292	1.363
ENSG00000084444	protein coding	4.711	0.023	1.869	2.819
ENSG00000084453	protein coding	7.682	0.532	2.013	4.948
ENSG00000084463	protein coding	4.581	0.155	1.926	2.483
ENSG00000084623	protein coding	3.176	0.51	1.317	2.293
ENSG00000084628	protein coding	2.922	0.34	0.624	1.958
ENSG00000084636	protein coding	5.418	0.483	4.815	0.388
ENSG00000084652	protein coding	5.012	0.281	1.641	3.09
ENSG00000084674	protein coding	14.121	0.128	13.692	1.299
ENSG00000084676	protein coding	7.405	0.349	4.326	2.482
ENSG00000084693	protein coding	3.261	0.367	2.661	0.531
ENSG00000084710	protein coding	7.486	0.237	2.454	4.795
ENSG00000084731	protein coding	5.462	0.58	2.382	2.47
ENSG00000084733	protein coding	3.561	0.525	0.603	2.433
ENSG00000084734	protein coding	2.189	0.066	1.878	0.245
ENSG00000084754	protein coding	3.087	0.076	2.379	0.958
ENSG00000084764	protein coding	1.89	0.231	0.846	0.871
ENSG00000084774	protein coding	7.286	0.183	6.678	0.425
ENSG00000085063	protein coding	7.724	0.265	0.387	7.116
ENSG00000085117	protein coding	2.212	0.278	0.804	1.232
ENSG00000085185	protein coding	7.465	0.227	5.358	1.935
ENSG00000085224	protein coding	11.165	0.632	7.479	3.471
ENSG00000085231	protein coding	1.626	0.338	0.519	1.077
ENSG00000085265	protein coding	7.588	0.041	0.981	6.566
ENSG00000085274	protein coding	4.969	0.067	1.833	3.038
ENSG00000085276	protein coding	5.732	1.292	3.72	1.41
ENSG00000085365	protein coding	6.143	0.252	1.017	5.071
ENSG00000085377	protein coding	7.25	0.618	2.133	4.926
ENSG00000085382	protein coding	5.318	0.277	2.73	1.668
ENSG00000085415	protein coding	5.206	0.494	1.266	2.284
ENSG00000085433	protein coding	4.24	0.252	2.784	1.216
ENSG00000085449	protein coding	4.607	0.073	1.233	3.323
ENSG00000085465	protein coding	2.196	0.014	2.037	0.145
ENSG00000085491	protein coding	4.249	0.711	1.434	2.61
ENSG00000085511	protein coding	5.5	0.205	4.827	0.515
ENSG00000085514	protein coding	1.271	0.199	0.912	0.244
ENSG00000085552	protein coding	4.205	0.174	3.54	0.306
ENSG00000085563	protein coding	5.205	0.324	3.843	1.226
ENSG00000085644	protein coding	5.889	0.359	1.38	2.116
ENSG00000085662	protein coding	1.93	0.04	0.951	0.468
ENSG00000085719	protein coding	4.857	0.161	1.614	3.088
ENSG00000085721	protein coding	3.706	0.078	1.956	1.711
ENSG00000085733	protein coding	3.272	0.211	1.905	1.422
ENSG00000085741	protein coding	1.9	0.265	1.065	0.74
ENSG00000085760	protein coding	2.536	0.461	2.184	0.053
ENSG00000085788	protein coding	4.682	0.927	2.136	2.237
ENSG00000085831	protein coding	6.287	0.27	1.842	4.863
ENSG00000085832	protein coding	5.163	0.035	2.691	2.437
ENSG00000085840	protein coding	3.121	0.178	2.586	0.352
ENSG00000085871	protein coding	1.78	0.252	0.444	1.161
ENSG00000085872	protein coding	4.084	0.059	2.784	1.265
ENSG00000085978	protein coding	4.208	0.257	1.875	1.418
ENSG00000085982	protein coding	5.695	0.743	3.744	1.872
ENSG00000085998	protein coding	6.035	0.601	2.247	0.869
ENSG00000085999	protein coding	3.114	0.643	2.244	0.401
ENSG00000086015	protein coding	5.737	0.284	5.397	0.056
ENSG00000086061	protein coding	2.319	0.111	1.194	1.004
ENSG00000086062	protein coding	4.176	0.187	1.197	2.812
ENSG00000086065	protein coding	1.957	0.2	0.66	1.241
ENSG00000086102	protein coding	4.599	0.057	3.363	1.179
ENSG00000086159	protein coding	5.129	0.337	0.849	1.468
ENSG00000086189	protein coding	3.507	0.235	0.954	1.929
ENSG00000086200	protein coding	4.365	0.269	3.048	1.383
ENSG00000086205	protein coding	4.11	0.345	2.253	1.664
ENSG00000086232	protein coding	4.411	0.092	1.893	2.426
ENSG00000086288	protein coding	2.308	0.233	1.767	0.154
ENSG00000086289	protein coding	2.515	0.3	0.675	1.54
ENSG00000086300	protein coding	4.2	0.392	0.672	1.816
ENSG00000086475	protein coding	3.265	0.299	1.179	1.714
ENSG00000086504	protein coding	2.229	0.223	0.771	0.706
ENSG00000086506	protein coding	0.528	0.028	0.429	0.071
ENSG00000086544	protein coding	3.376	0.024	2.052	1.477
ENSG00000086548	protein coding	2.594	0.246	1.035	1.41
ENSG00000086570	protein coding	14.71	0.167	13.05	1.473
ENSG00000086589	protein coding	2.299	0.077	1.263	0.959
ENSG00000086598	protein coding	2.544	1.26	0.606	1.853
ENSG00000086619	protein coding	7.818	0.175	1.404	3.415
ENSG00000086666	protein coding	2.594	0.317	0.627	0.765
ENSG00000086696	protein coding	7.925	0.172	1.164	7.358
ENSG00000086712	protein coding	4.362	0.056	1.587	2.753
ENSG00000086717	protein coding	3.204	0.421	1.962	0.434
ENSG00000086730	protein coding	2.453	0.693	0.732	1.566
ENSG00000086758	protein coding	14.796	0.296	13.125	1.213
ENSG00000086827	protein coding	2.873	0.069	2.34	0.54
ENSG00000086848	protein coding	6.158	0.527	1.857	4.202
ENSG00000086967	protein coding	3.604	0.062	3.426	0.116
ENSG00000086991	protein coding	4.269	0.319	1.737	2.403
ENSG00000087008	protein coding	2.872	0.141	2.103	0.679
ENSG00000087053	protein coding	7.939	0.249	1.932	3.405
ENSG00000087074	protein coding	2.35	0.231	2.025	0.949
ENSG00000087076	protein coding	1.05	0.099	0.813	0.234
ENSG00000087077	protein coding	1.75	0.111	1.431	0.364
ENSG00000087085	protein coding	2.956	0.422	1.854	0.964
ENSG00000087086	protein coding	0.871	0.199	0.528	0.144
ENSG00000087087	protein coding	2.99	0.226	2.631	0.632
ENSG00000087088	protein coding	1.358	0.054	0.657	0.701
ENSG00000087095	protein coding	3.526	0.197	1.584	1.745
ENSG00000087111	protein coding	3.088	0.338	1.668	1.113
ENSG00000087116	protein coding	6.783	0.133	3.636	3.014
ENSG00000087128	protein coding	2.122	0.05	1.272	0.8
ENSG00000087152	protein coding	3.951	0.389	1.065	2.458
ENSG00000087157	protein coding	3.062	0.017	1.671	0.599
ENSG00000087191	protein coding	2.586	0.26	1.221	0.231
ENSG00000087206	protein coding	2.574	0.139	2.16	0.703
ENSG00000087237	protein coding	1.786	0.19	1.482	0.179
ENSG00000087245	protein coding	3.514	0.336	1.983	1.249
ENSG00000087250	protein coding	1.55	0.063	0.342	0.249
ENSG00000087253	protein coding	5.313	0.11	1.635	3.568
ENSG00000087258	protein coding	5.767	0.846	1.065	4.249
ENSG00000087263	protein coding	4.587	0.092	1.629	2.899
ENSG00000087266	protein coding	9.211	0.308	1.857	7.264
ENSG00000087269	protein coding	3.556	0.087	2.574	0.895
ENSG00000087274	protein coding	5.179	0.685	2.4	1.902
ENSG00000087299	protein coding	6.095	0.079	1.392	4.624
ENSG00000087301	protein coding	4.557	0.19	2.478	1.708
ENSG00000087302	protein coding	7.007	0.126	0.735	6.178
ENSG00000087303	protein coding	4.87	0.065	4.128	0.677
ENSG00000087338	protein coding	4.161	0.233	1.548	2.38
ENSG00000087365	protein coding	3.932	0.124	2.688	0.563
ENSG00000087448	protein coding	6.49	0.283	1.518	4.874
ENSG00000087460	protein coding	7.318	0.552	3.117	0.51
ENSG00000087470	protein coding	5.892	0.394	2.25	2.24
ENSG00000087494	protein coding	1.891	0.367	0.63	1.022
ENSG00000087495	protein coding	2.736	0.617	1.68	0.581
ENSG00000087502	protein coding	5.033	0.576	1.134	3.804
ENSG00000087510	protein coding	2.862	0.239	1.353	1.27
ENSG00000087586	protein coding	2.248	0.278	1.212	0.805
ENSG00000087589	protein coding	4.195	0.199	2.361	1.64
ENSG00000087842	protein coding	1.539	0.409	0.873	0.205
ENSG00000087884	protein coding	0.726	0.128	0.507	0.333
ENSG00000087903	protein coding	3.959	0.209	2.172	1.671
ENSG00000087995	protein coding	5.799	0.115	1.137	4.656
ENSG00000088002	protein coding	1.447	0.375	1.098	0.019
ENSG00000088035	protein coding	3.325	0.207	1.524	1.533
ENSG00000088038	protein coding	4.537	1.583	2.262	1.93
ENSG00000088053	protein coding	2.268	0.36	1.863	1.216
ENSG00000088179	protein coding	11.09	0.463	2.781	7.829
ENSG00000088205	protein coding	5.674	0.087	2.013	1.653
ENSG00000088247	protein coding	4.276	0.14	2.244	1.922
ENSG00000088256	protein coding	4.19	0.29	1.08	2.82
ENSG00000088280	protein coding	4.051	0.097	2.712	1.293
ENSG00000088298	protein coding	1.884	0.078	1.737	0.069
ENSG00000088305	protein coding	4.369	0.315	2.562	1.594
ENSG00000088320	protein coding	1.66	0.219	0.897	0.465
ENSG00000088325	protein coding	3.605	0.351	2.352	0.725
ENSG00000088356	protein coding	1.957	0.085	0.402	1.47
ENSG00000088367	protein coding	8.418	0.214	4.788	3.459
ENSG00000088386	protein coding	3.124	0.074	2.127	0.923
ENSG00000088387	protein coding	11.831	1.165	6.279	4.625
ENSG00000088448	protein coding	2.495	0.135	1.263	1.097
ENSG00000088451	protein coding	1.797	0.016	1.053	0.728
ENSG00000088538	protein coding	9.069	0.337	6.093	2.639
ENSG00000088543	protein coding	2.657	0.285	0.489	1.632
ENSG00000088682	protein coding	1.827	0.169	0.957	0.646
ENSG00000088726	protein coding	2.025	0.207	0.702	1.246
ENSG00000088727	protein coding	3.337	0.625	2.373	0.654
ENSG00000088756	protein coding	5.858	3.177	2.19	3.562
ENSG00000088766	protein coding	3.925	0.154	0.906	2.97
ENSG00000088782	protein coding	0.53	0.091	0.3	0.139
ENSG00000088808	protein coding	5.5	0.268	3.273	1.959
ENSG00000088812	protein coding	8.651	0.09	4.29	4.271
ENSG00000088826	protein coding	2.322	0.199	1.758	0.34
ENSG00000088827	protein coding	6.96	0.131	5.13	2.936
ENSG00000088832	protein coding	3.564	0.166	0.39	3.112
ENSG00000088833	protein coding	3.799	0.094	1.119	1.75
ENSG00000088836	protein coding	3.229	0.212	2.757	0.37
ENSG00000088854	protein coding	6.912	0.112	3.534	3.266
ENSG00000088876	protein coding	3.675	0.252	1.923	1.344
ENSG00000088881	protein coding	3.521	0.866	1.809	0.841
ENSG00000088882	protein coding	2.376	0.055	2.205	0.116
ENSG00000088888	protein coding	11.731	0.184	1.623	9.976
ENSG00000088899	protein coding	5.257	1.398	2.022	1.837
ENSG00000088926	protein coding	3.053	0.107	1.878	1.067
ENSG00000088930	protein coding	3.408	0.068	2.853	0.487
ENSG00000088970	protein coding	3.856	0.198	2.022	2.29
ENSG00000088986	protein coding	1.376	0.321	0.27	1.048
ENSG00000088992	protein coding	1.057	0.197	0.645	0.288
ENSG00000089006	protein coding	3.931	0.369	1.215	0.76
ENSG00000089009	protein coding	2.008	0.534	0.867	0.035
ENSG00000089012	protein coding	1.732	0.154	1.164	0.485
ENSG00000089022	protein coding	11.083	0.506	1.422	9.161
ENSG00000089041	protein coding	5.113	0.152	1.788	3.23
ENSG00000089048	protein coding	3.216	0.065	2.556	0.552
ENSG00000089050	protein coding	3.843	0.058	0.561	3.224
ENSG00000089053	protein coding	6.149	0.689	2.268	0.335
ENSG00000089057	protein coding	6.962	0.154	1.953	4.616
ENSG00000089060	protein coding	3.51	1.153	1.755	1.198
ENSG00000089063	protein coding	1.735	0.331	0.552	0.951
ENSG00000089091	protein coding	3.739	1.567	2.334	1.206
ENSG00000089094	protein coding	6.676	0.407	4.011	1.299
ENSG00000089101	protein coding	4.098	0.174	3.714	0.528
ENSG00000089116	protein coding	2.739	0.373	1.209	1.157
ENSG00000089123	protein coding	2.342	0.074	1.263	0.966
ENSG00000089127	protein coding	7.546	0.387	1.245	2.94
ENSG00000089154	protein coding	8.681	0.018	8.016	0.647
ENSG00000089157	protein coding	2.591	0.325	0.954	0.227
ENSG00000089159	protein coding	5.457	0.476	3.246	2.133
ENSG00000089163	protein coding	1.217	0.148	0.945	0.213
ENSG00000089169	protein coding	5.188	0.265	2.085	2.101
ENSG00000089177	protein coding	5.276	0.173	4.179	1.149
ENSG00000089195	protein coding	3.025	0.281	1.494	1.307
ENSG00000089199	protein coding	2.462	0.153	2.034	0.304
ENSG00000089220	protein coding	1.431	0.086	0.564	0.781
ENSG00000089225	protein coding	3.825	0.629	1.557	1.621
ENSG00000089234	protein coding	3.996	0.164	1.779	2.053
ENSG00000089248	protein coding	1.698	0.54	0.786	1.053
ENSG00000089250	protein coding	12.283	0.42	4.407	7.167
ENSG00000089280	protein coding	4.92	0.077	1.584	0.204
ENSG00000089289	protein coding	1.862	0.499	1.02	0.343
ENSG00000089327	protein coding	1.58	0.778	0.585	0.392
ENSG00000089335	protein coding	3.839	0.465	1.332	2.223
ENSG00000089351	protein coding	2.825	0.156	2.424	0.421
ENSG00000089356	protein coding	1.467	0.137	0.435	0.867
ENSG00000089472	protein coding	6.751	0.254	3.477	2.875
ENSG00000089486	protein coding	3.009	0.535	0.627	1.903
ENSG00000089505	protein coding	1.07	0.202	0.861	0.305
ENSG00000089558	protein coding	3.788	0.197	3.054	0.309
ENSG00000089597	protein coding	3.906	0.165	2.901	1.099
ENSG00000089639	protein coding	3.528	0.128	2.913	0.487
ENSG00000089682	protein coding	7.005	0.05	1.314	5.642
ENSG00000089685	protein coding	2.711	0.131	0.498	2.082
ENSG00000089692	protein coding	2.587	0.334	1.578	0.159
ENSG00000089693	protein coding	1.555	0.344	0.747	0.552
ENSG00000089723	protein coding	3.911	0.198	0.705	3.008
ENSG00000089737	protein coding	5.573	0.084	2.58	2.904
ENSG00000089775	protein coding	10.365	0.727	1.308	8.872
ENSG00000089818	protein coding	5.166	0.454	0.828	1.791
ENSG00000089820	protein coding	3.372	0.168	2.961	0.586
ENSG00000089847	protein coding	4.026	0.152	3.711	0.309
ENSG00000089876	protein coding	3.05	0.899	2.232	0.35
ENSG00000089902	protein coding	5.751	0.238	1.458	4.055
ENSG00000089916	protein coding	14.021	0.718	1.449	12.492
ENSG00000090006	protein coding	5.032	0.283	4.875	0.268
ENSG00000090013	protein coding	1.392	0.076	0.738	0.525
ENSG00000090020	protein coding	4.737	0.791	2.448	1.498
ENSG00000090054	protein coding	4.92	0.043	1.515	3.041
ENSG00000090060	protein coding	4.515	0.211	2.238	2.214
ENSG00000090061	protein coding	5.627	0.375	1.743	1.658
ENSG00000090097	protein coding	2.599	0.34	1.212	0.891
ENSG00000090104	protein coding	2.653	0.02	0.63	0.702
ENSG00000090238	protein coding	1.941	0.731	0.474	0.997
ENSG00000090263	protein coding	4.21	0.134	0.321	3.82
ENSG00000090266	protein coding	1.666	0.193	0.318	1.239
ENSG00000090273	protein coding	1.792	0.351	0.996	0.69
ENSG00000090316	protein coding	5.371	0.21	1.305	0.968
ENSG00000090339	protein coding	2.967	0.067	1.599	1.328
ENSG00000090372	protein coding	3.628	0.451	2.283	0.828
ENSG00000090376	protein coding	8.328	0.105	1.791	6.451
ENSG00000090382	protein coding	1.49	0.028	0.447	1.015
ENSG00000090402	protein coding	6.012	0.064	5.484	0.464
ENSG00000090432	protein coding	2.428	0.127	1.059	1.242
ENSG00000090447	protein coding	6.491	0.277	1.017	0.869
ENSG00000090470	protein coding	2.823	0.027	1.458	1.338
ENSG00000090487	protein coding	2.059	0.764	0.927	0.681
ENSG00000090512	protein coding	1.721	0.26	1.149	0.879
ENSG00000090520	protein coding	5.684	0.735	1.077	0.414
ENSG00000090530	protein coding	3.477	0.235	2.127	1.184
ENSG00000090534	protein coding	2.186	0.325	1.482	0.578
ENSG00000090539	protein coding	4.719	0.265	2.868	0.463
ENSG00000090554	protein coding	1.301	0.128	0.708	0.764
ENSG00000090565	protein coding	4.801	0.358	2.271	2.172
ENSG00000090581	protein coding	3.926	0.035	1.002	1.391
ENSG00000090612	protein coding	13.39	0.278	2.844	10.302
ENSG00000090615	protein coding	9.426	0.543	4.497	4.334
ENSG00000090621	protein coding	7.336	0.839	1.983	0.414
ENSG00000090659	protein coding	4.284	0.107	1.215	3.046
ENSG00000090661	protein coding	2.401	0.315	1.185	0.312
ENSG00000090674	protein coding	2.253	0.127	1.743	0.214
ENSG00000090686	protein coding	4.419	0.957	3.144	1.119
ENSG00000090776	protein coding	3.303	0.756	1.041	1.506
ENSG00000090857	protein coding	8.549	0.389	2.64	5.658
ENSG00000090861	protein coding	6.004	0.159	3	1.154
ENSG00000090863	protein coding	9.287	0.22	3.612	5.727
ENSG00000090889	protein coding	4.388	0.047	3.699	0.621
ENSG00000090905	protein coding	8.491	0.191	5.889	2.796
ENSG00000090924	protein coding	8.048	0.744	4.161	3.121
ENSG00000090932	protein coding	2.332	0.028	1.857	0.468
ENSG00000090971	protein coding	1.35	0.071	0.621	0.74
ENSG00000090975	protein coding	7.134	0.522	4.05	2.547
ENSG00000090989	protein coding	3.592	0.306	2.685	0.591
ENSG00000091009	protein coding	6.537	0.161	3.183	3.193
ENSG00000091010	protein coding	2.575	0.274	1.017	1.284
ENSG00000091039	protein coding	7.239	0.614	2.67	4.092
ENSG00000091073	protein coding	2.769	0.265	1.869	0.393
ENSG00000091106	protein coding	3.416	0.164	3.075	0.297
ENSG00000091127	protein coding	3.525	0.22	1.986	1.287
ENSG00000091128	protein coding	5.861	0.056	5.286	0.491
ENSG00000091129	protein coding	6.701	0.235	3.915	2.284
ENSG00000091136	protein coding	6.737	0.306	5.361	0.37
ENSG00000091137	protein coding	4.737	0.204	2.343	2.363
ENSG00000091138	protein coding	2.882	0.115	2.295	0.412
ENSG00000091140	protein coding	3.537	0.087	1.53	1.939
ENSG00000091157	protein coding	7.295	0.234	4.473	2.604
ENSG00000091164	protein coding	6.84	0.599	0.87	5.818
ENSG00000091181	protein coding	5.739	0.43	1.263	3.901
ENSG00000091262	protein coding	5.203	0.088	4.512	0.677
ENSG00000091317	protein coding	3.307	0.107	0.552	2.648
ENSG00000091409	protein coding	5.816	0.203	3.393	2.369
ENSG00000091428	protein coding	4.301	0.39	3.036	1.126
ENSG00000091436	protein coding	7.179	0.236	2.403	5.616
ENSG00000091482	protein coding	0.885	0.175	0.267	0.417
ENSG00000091483	protein coding	5.122	0.077	1.533	1.646
ENSG00000091490	protein coding	4.543	0.297	3.399	0.992
ENSG00000091513	protein coding	20.166	0.21	2.097	18.021
ENSG00000091527	protein coding	3.621	0.359	0.777	3.086
ENSG00000091536	protein coding	11.811	0.502	10.593	0.93
ENSG00000091542	protein coding	3.159	0.416	1.185	1.558
ENSG00000091583	protein coding	1.174	0.12	1.038	0.1
ENSG00000091592	protein coding	7.742	0.552	4.434	2.613
ENSG00000091622	protein coding	7.149	0.149	2.925	4.075
ENSG00000091640	protein coding	1.668	0.791	0.684	0.49
ENSG00000091651	protein coding	1.833	0.287	0.759	0.809
ENSG00000091656	protein coding	13.987	0.374	10.851	2.716
ENSG00000091664	protein coding	3.665	0.153	1.749	1.763
ENSG00000091704	protein coding	1.931	0.117	1.26	0.103
ENSG00000091732	protein coding	2.164	0.194	1.509	0.44
ENSG00000091831	protein coding	6.466	1.39	1.788	4.308
ENSG00000091844	protein coding	7.932	0.159	0.633	7.115
ENSG00000091879	protein coding	5.416	0.475	1.491	3.469
ENSG00000091947	protein coding	1.83	0.34	0.774	0.74
ENSG00000091972	protein coding	2.129	0.355	0.885	1.267
ENSG00000091986	protein coding	12.301	0.817	2.853	8.62
ENSG00000092009	protein coding	0.937	0.124	0.744	0.163
ENSG00000092010	protein coding	1.136	0.179	0.753	0.32
ENSG00000092020	protein coding	1.846	0.558	1.362	0.722
ENSG00000092036	protein coding	1.642	0.403	1.092	0.297
ENSG00000092051	protein coding	4.386	0.611	1.887	1.596
ENSG00000092054	protein coding	6.027	0.056	5.808	0.114
ENSG00000092067	protein coding	1.266	0.164	0.846	0.181
ENSG00000092068	protein coding	4.236	0.746	1.608	2.049
ENSG00000092094	protein coding	3.258	0.129	1.008	0.839
ENSG00000092096	protein coding	2.455	0.171	1.95	0.623
ENSG00000092098	protein coding	4.054	0.246	3.219	0.388
ENSG00000092108	protein coding	5.328	0.159	1.929	3.842
ENSG00000092140	protein coding	5.77	1.447	2.211	3.53
ENSG00000092148	protein coding	9.445	0.778	7.833	0.949
ENSG00000092199	protein coding	4.501	2.916	0.921	2.201
ENSG00000092200	protein coding	4.061	0.08	3.861	0.346
ENSG00000092201	protein coding	4.433	0.092	3.144	1.197
ENSG00000092203	protein coding	4.711	0.157	1.866	2.569
ENSG00000092208	protein coding	1.476	0.054	0.828	0.55
ENSG00000092295	protein coding	2.744	0.452	2.454	0.199
ENSG00000092330	protein coding	3.584	0.331	1.356	1.446
ENSG00000092345	protein coding	3.104	0.288	0.948	1.868
ENSG00000092377	protein coding	2.396	0.297	1.569	0.191
ENSG00000092421	protein coding	6.828	1.787	3.144	3.058
ENSG00000092439	protein coding	10.382	0.264	5.598	4.52
ENSG00000092445	protein coding	8.032	0.798	2.673	5.313
ENSG00000092470	protein coding	3.932	0.139	1.881	2.02
ENSG00000092529	protein coding	6.433	3.516	2.466	1.729
ENSG00000092531	protein coding	2.48	0.408	0.636	1.581
ENSG00000092607	protein coding	4.042	0.548	1.809	1.686
ENSG00000092621	protein coding	3.18	0.286	1.602	0.348
ENSG00000092758	protein coding	2.497	0.044	2.055	0.427
ENSG00000092820	protein coding	3.068	0.134	1.761	1.173
ENSG00000092841	protein coding	1.564	0.087	0.717	0.967
ENSG00000092847	protein coding	13.712	0.213	2.676	10.925
ENSG00000092850	protein coding	1.738	0.173	1.293	0.464
ENSG00000092853	protein coding	8.512	0.108	4.02	4.384
ENSG00000092871	protein coding	7.293	0.365	1.092	5.978
ENSG00000092929	protein coding	4.382	0.379	3.429	0.74
ENSG00000092931	protein coding	2.952	0.966	1.35	0.989
ENSG00000092964	protein coding	4.798	0.412	2.034	2.472
ENSG00000092969	protein coding	5.868	1.366	1.329	3.257
ENSG00000092978	protein coding	5.859	0.119	1.587	4.153
ENSG00000093000	protein coding	5.151	0.372	1.407	3.362
ENSG00000093009	protein coding	2.072	0.144	1.797	0.162
ENSG00000093010	protein coding	3.119	0.83	0.909	1.495
ENSG00000093072	protein coding	5.353	0.611	1.536	2.693
ENSG00000093144	protein coding	2.585	0.504	1.026	1.516
ENSG00000093167	protein coding	3.585	0.491	2.166	1.225
ENSG00000093183	protein coding	6.34	0.183	0.912	5.279
ENSG00000093217	protein coding	3.667	0.109	1.668	2.041
ENSG00000094631	protein coding	5.807	0.501	3.648	1.274
ENSG00000094661	protein coding	5.984	0.086	1.068	4.837
ENSG00000094755	protein coding	3.576	0.469	1.323	1.789
ENSG00000094796	protein coding	1.615	0.069	1.251	0.295
ENSG00000094804	protein coding	4.564	0.229	1.683	2.656
ENSG00000094841	protein coding	2.711	0.17	0.93	1.374
ENSG00000094880	protein coding	3.133	0.031	1.794	1.328
ENSG00000094914	protein coding	2.69	0.735	1.641	0.572
ENSG00000094916	protein coding	11.546	0.359	0.576	10.813
ENSG00000094963	protein coding	5.215	0.19	1.608	3.541
ENSG00000094975	protein coding	5.916	0.38	4.218	1.574
[truncated: 20,883 more rows]

## Sheet: C-basal vs arsenite vs sorbitol
geneID	geneType	dataset	SG proximal?		log2TE	m6A sites	5'UTR		CDS		3'UTR
			sorbitol	arsenite			length (kb)	AU content	length (kb)	AU content	length (kb)	AU content
ENSG00000000003	protein coding	de-novo	1	0	-0.359309	0	0.489	0.509202	0.738	0.588076	2.918	0.630912
ENSG00000001084	protein coding	de-novo	0	1	0.0470902	0	1.273	0.547526	1.92	0.553646	1.415	0.670671
ENSG00000001167	protein coding	de-novo	1	1	0.329965	6	0.172	0.348837	1.044	0.466475	4.993	0.557981
ENSG00000001497	protein coding	pre-existing	0	1	0.176754	0	0.264	0.42803	2.205	0.457143	4.269	0.483017
ENSG00000003393	protein coding	de-novo	0	1	-1.58316	2	0.96	0.471875	5.076	0.528172	5.125	0.606439
ENSG00000004487	protein coding	basal-specific	0	0	-0.11218	0	0.154	0.214286	2.637	0.492984	3.931	0.575172
ENSG00000004864	protein coding	basal-specific	0	0	-0.199615	0	0.191	0.256545	2.031	0.540128	0.971	0.633368
ENSG00000004975	protein coding	basal-specific	0	0	0.298244	0	0.255	0.262745	2.211	0.388964	0.523	0.49522
ENSG00000005007	protein coding	basal-specific	0	0	0.45355	4	0.251	0.227092	3.39	0.397345	1.713	0.424985
ENSG00000005100	protein coding	de-novo	1	1	0	3	0.123	0.252033	2.124	0.449623	3.288	0.563564
ENSG00000005156	protein coding	basal-specific	0	0	-0.147637	2	0.33	0.448485	3.03	0.478878	5.237	0.553561
ENSG00000005812	protein coding	de-novo	1	0	-1.35867	3	0.37	0.27027	1.287	0.582751	1.885	0.706631
ENSG00000005889	protein coding	de-novo	1	0	-2.33943	8	0.427	0.4637	2.535	0.552663	4.879	0.645829
ENSG00000006007	protein coding	de-novo	1	0	-1.61675	2	0.431	0.559165	0.996	0.511044	1.777	0.562183
ENSG00000006125	protein coding	pre-existing	1	0	0.460897	0	0.553	0.481013	2.856	0.536415	3.14	0.541083
ENSG00000006576	protein coding	de-novo	1	0	-0.86952	0	0.234	0.32906	2.358	0.592027	2.625	0.688762
ENSG00000006634	protein coding	de-novo	1	0	-2.60033	2	0.517	0.299807	2.025	0.638025	2.008	0.655876
ENSG00000006712	protein coding	basal-specific	0	0	1.23407	2	0.29	0.303448	1.596	0.453008	0.362	0.541436
ENSG00000006715	protein coding	basal-specific	0	0	-1.72389	2	0.246	0.573171	2.565	0.581287	3.272	0.601773
ENSG00000006744	protein coding	pre-existing	0	1	-0.828857	3	0.215	0.437209	2.481	0.436921	1.206	0.511609
ENSG00000007168	protein coding	de-novo	1	1	0.134938	0	0.543	0.384899	1.287	0.560218	4.993	0.600641
ENSG00000007202	protein coding	de-novo	0	1	-2.99302	5	0.391	0.506394	6.708	0.484049	0.918	0.504357
ENSG00000007923	protein coding	basal-specific	0	0	-0.632484	1	0.124	0.266129	1.68	0.469643	3.558	0.462057
ENSG00000008083	protein coding	basal-specific	0	0	-0.872228	8	0.581	0.459552	3.741	0.439455	1.791	0.602457
ENSG00000008256	protein coding	de-novo	0	1	-0.788024	2	0.137	0.160584	1.203	0.487947	3.168	0.474747
ENSG00000008294	protein coding	basal-specific	0	0	-0.852488	0	0.218	0.458716	3.966	0.541856	4.098	0.63348
ENSG00000008838	protein coding	basal-specific	0	0	-0.215003	1	0.441	0.460317	3.045	0.425616	2.949	0.412004
ENSG00000008952	protein coding	de-novo	1	0	-0.462156	3	0.022	0.227273	1.2	0.589167	5.31	0.646516
ENSG00000009335	protein coding	de-novo	1	0	-1.38721	1	0.347	0.207493	3.252	0.54182	1.615	0.565944
ENSG00000009844	protein coding	de-novo	1	0	0.432546	0	0.205	0.37561	0.924	0.556277	6.042	0.632241
ENSG00000009954	protein coding	pre-existing	0	1	-1.3333	7	0.36	0.236111	4.452	0.53257	1.303	0.557176
ENSG00000010072	protein coding	de-novo	1	0	-1.35752	0	1.28	0.369531	1.47	0.553061	1.662	0.676895
ENSG00000010292	protein coding	pre-existing	0	1	0.02539	0	0.179	0.452514	4.206	0.475749	3.965	0.472383
ENSG00000010818	protein coding	basal-specific	0	0	-0.89775	7	1.062	0.488701	7.341	0.508105	1.638	0.639194
ENSG00000011007	protein coding	de-novo	1	0	-0.885238	7	0.056	0.232143	2.319	0.495041	3.155	0.550555
ENSG00000011376	protein coding	pre-existing	0	1	-2.34841	5	0.358	0.502793	2.712	0.488569	7.196	0.510561
ENSG00000011454	protein coding	basal-specific	0	0	-0.770947	2	0.606	0.613861	3.21	0.562928	1.653	0.577737
ENSG00000011485	protein coding	basal-specific	0	0	-0.0416191	0	0.307	0.397394	1.5	0.438	0.629	0.3593
ENSG00000013375	protein coding	de-novo	1	0	0.817349	2	0.248	0.274194	1.713	0.562755	6.107	0.637138
ENSG00000013503	protein coding	de-novo	1	0	-0.691028	2	0.243	0.485597	3.402	0.560259	0.649	0.619414
ENSG00000013810	protein coding	basal-specific	0	0	0.230889	4	0.276	0.413043	2.517	0.420739	1.967	0.448907
ENSG00000014123	protein coding	basal-specific	0	0	-0.735082	0	0.068	0.352941	2.385	0.593291	1.773	0.72194
ENSG00000014216	protein coding	basal-specific	0	0	1.58496	0	0.379	0.292876	2.145	0.404196	0.72	0.370833
ENSG00000016391	protein coding	de-novo	0	1	-0.46445	5	0.467	0.291221	1.785	0.365826	5.442	0.526277
ENSG00000019549	protein coding	de-novo	1	0	-4.24207	1	0.358	0.332402	0.807	0.506815	1.209	0.685691
ENSG00000020129	protein coding	basal-specific	0	0	0.803618	1	0.429	0.312354	2.19	0.361644	1.116	0.400538
ENSG00000021574	protein coding	de-novo	1	0	-1.20494	0	0.276	0.264493	1.851	0.52242	3.265	0.674119
ENSG00000021776	protein coding	basal-specific	0	0	-0.50265	0	0.129	0.372093	4.458	0.581427	5.01	0.62016
ENSG00000023041	protein coding	de-novo	1	0	-2.1352	0	0.682	0.504399	1.326	0.586727	2.064	0.629845
ENSG00000023330	protein coding	basal-specific	0	0	-0.751538	0	0.36	0.388889	1.923	0.482059	0.147	0.693878
ENSG00000023516	protein coding	de-novo	1	0	-1.27744	3	0.176	0.534091	5.706	0.59972	4.033	0.669725
ENSG00000024526	protein coding	de-novo	1	0	-1.43143	0	0.48	0.564583	2.436	0.629721	2.78	0.68741
ENSG00000025293	protein coding	de-novo	0	1	-1.97454	3	0.372	0.459677	3.039	0.51234	2.743	0.589865
ENSG00000027697	protein coding	de-novo	1	0	-0.943473	0	0.611	0.453355	1.47	0.591156	2.043	0.622614
ENSG00000029725	protein coding	de-novo	0	1	-1.465	7	0.222	0.252252	2.589	0.562766	3.117	0.621431
ENSG00000030066	protein coding	pre-existing	1	1	-1.06595	1	0.135	0.348148	4.311	0.546277	1.652	0.567191
ENSG00000031698	protein coding	basal-specific	0	0	-0.436837	5	0.075	0.333333	1.611	0.487275	0.294	0.455782
ENSG00000035403	protein coding	pre-existing	1	1	0.0327479	0	0.094	0.287234	3.405	0.476358	3.194	0.569505
ENSG00000035499	protein coding	de-novo	1	1	-0.965366	0	0.097	0.247423	1.59	0.564151	1.486	0.569987
ENSG00000035928	protein coding	pre-existing	0	1	-1.09637	2	0.134	0.365672	3.447	0.585437	1.305	0.597701
ENSG00000036549	protein coding	de-novo	1	0	-3.40892	4	0.486	0.50823	2.712	0.588496	3.224	0.657878
ENSG00000037474	protein coding	de-novo	1	1	-0.102952	3	0.312	0.358974	2.304	0.513455	2.296	0.552265
ENSG00000037749	protein coding	de-novo	1	0	-0.181055	5	0.482	0.510373	1.089	0.555556	4.676	0.609495
ENSG00000038358	protein coding	basal-specific	0	0	0.0684676	0	0.21	0.238095	4.206	0.40466	0.351	0.470085
ENSG00000040633	protein coding	de-novo	0	1	-0.336267	5	0.534	0.393258	1.212	0.433168	0.597	0.542714
ENSG00000041357	protein coding	de-novo	1	0	-0.0577812	0	0.27	0.662963	0.786	0.599237	3.473	0.578462
ENSG00000044090	protein coding	basal-specific	0	0	0.0358363	1	0.33	0.272727	5.193	0.410168	3.165	0.409163
ENSG00000044115	protein coding	pre-existing	1	1	0.91468	0	0.614	0.553746	2.721	0.501286	2.535	0.493886
ENSG00000044574	protein coding	de-novo	1	0	0.428601	2	0.256	0.367188	1.965	0.523155	1.739	0.577918
ENSG00000046604	protein coding	de-novo	0	1	0.0530652	1	0.075	0.16	3.357	0.557641	2.265	0.646799
ENSG00000047230	protein coding	de-novo	1	0	-0.730695	0	0.744	0.420699	1.761	0.558206	1.818	0.592409
ENSG00000047249	protein coding	basal-specific	0	0	-0.00306793	0	0.56	0.328571	1.452	0.557851	1.292	0.551858
ENSG00000047315	protein coding	de-novo	1	0	-0.754471	0	0.416	0.480769	3.525	0.584113	0.17	0.752941
ENSG00000047849	protein coding	basal-specific	0	0	0.158266	6	0.519	0.267823	6.894	0.520017	2.374	0.637321
ENSG00000048392	protein coding	de-novo	1	0	0.288554	0	0.087	0.333333	1.227	0.547677	3.631	0.675296
ENSG00000049323	protein coding	de-novo	0	1	-0.360128	0	0.372	0.201613	5.166	0.474061	0.964	0.667012
ENSG00000049449	protein coding	de-novo	1	1	-0.44679	1	0.435	0.455172	0.996	0.487952	1.25	0.636
ENSG00000050405	protein coding	de-novo	1	0	1.32256	4	1.27	0.614173	2.283	0.534385	1.276	0.664577
ENSG00000052749	protein coding	basal-specific	0	0	-0.0370442	2	0.445	0.478652	3.894	0.411659	0.393	0.435115
ENSG00000054118	protein coding	pre-existing	0	1	-0.589543	7	0.34	0.491176	2.868	0.504533	1.34	0.56194
ENSG00000055044	protein coding	de-novo	1	0	-1.31632	0	0.206	0.38835	1.59	0.603774	0.242	0.57438
ENSG00000055130	protein coding	de-novo	1	1	-0.6344	4	0.526	0.553232	2.331	0.568855	2.803	0.554049
ENSG00000055917	protein coding	de-novo	1	0	-1.27281	0	0.442	0.533937	3.195	0.545853	2.894	0.66897
ENSG00000056586	protein coding	de-novo	1	0	-2.69006	1	0.601	0.665557	3.576	0.555928	5.071	0.662591
ENSG00000057608	protein coding	de-novo	1	0	0.56308	0	0.245	0.395918	1.338	0.581465	0.783	0.61175
ENSG00000058272	protein coding	de-novo	1	0	-0.144412	0	0.291	0.560137	3.093	0.580019	2.366	0.679628
ENSG00000058804	protein coding	de-novo	1	0	-0.290393	1	0.035	0.342857	2.025	0.573827	2.492	0.64687
ENSG00000059573	protein coding	pre-existing	0	1	-1.14882	0	0.143	0.370629	2.388	0.489112	0.821	0.585871
ENSG00000060237	protein coding	basal-specific	0	0	-0.654151	7	0.987	0.24924	8.502	0.501647	2.66	0.611654
ENSG00000061676	protein coding	de-novo	1	0	-0.902221	0	0.759	0.264822	3.405	0.604112	16.587	0.617833
ENSG00000061794	protein coding	de-novo	1	0	0.695598	0	0.022	0.227273	0.972	0.566872	1.121	0.64496
ENSG00000061918	protein coding	basal-specific	0	0	1.41741	0	0.5	0.382	1.956	0.559305	1.402	0.68117
ENSG00000062194	protein coding	de-novo	1	0	-2.62692	4	1.566	0.599617	1.482	0.58637	1.927	0.667878
ENSG00000062650	protein coding	de-novo	1	1	#N/A	6	0.45	0.295556	3.573	0.587462	2.287	0.660254
ENSG00000062716	protein coding	de-novo	1	0	0.440781	0	0.449	0.536748	1.221	0.568387	2.344	0.626706
ENSG00000062725	protein coding	de-novo	1	0	-0.0951357	0	0.311	0.299035	1.758	0.589875	4.423	0.643681
ENSG00000062822	protein coding	basal-specific	0	0	-0.718454	0	0.379	0.456464	3.402	0.348618	0.77	0.34026
ENSG00000063244	protein coding	basal-specific	0	0	0.366339	3	0.959	0.363921	1.428	0.393557	1.627	0.413645
ENSG00000063601	protein coding	de-novo	0	1	-0.967316	2	0.303	0.547855	2.022	0.522255	2.379	0.540984
ENSG00000064419	protein coding	pre-existing	1	0	-0.563071	0	0.682	0.438416	2.874	0.527836	1.237	0.557801
ENSG00000064703	protein coding	de-novo	1	0	-0.408513	5	0.262	0.473282	2.475	0.547879	4.513	0.625969
ENSG00000064995	protein coding	de-novo	1	0	-0.521079	2	0.114	0.403509	0.636	0.518868	1.906	0.58447
ENSG00000064999	protein coding	basal-specific	0	0	0.0393487	2	1.754	0.428734	3.585	0.427057	2.797	0.48838
ENSG00000065000	protein coding	basal-specific	0	0	0.104471	1	0.232	0.189655	3.648	0.416118	1.185	0.425316
ENSG00000065150	protein coding	pre-existing	1	0	-0.915041	1	0.426	0.539906	3.348	0.565412	2.474	0.63177
ENSG00000065183	protein coding	de-novo	1	1	-0.849648	1	0.095	0.389474	2.832	0.558969	7.096	0.624577
ENSG00000065328	protein coding	pre-existing	1	1	-0.768651	2	0.261	0.509579	2.628	0.517123	1.944	0.63786
ENSG00000065559	protein coding	de-novo	1	0	-0.73441	2	0.058	0.310345	1.233	0.550689	2.57	0.601946
ENSG00000065809	protein coding	de-novo	0	1	1.02528	2	0.549	0.582878	0.921	0.508143	2.633	0.609571
ENSG00000065882	protein coding	basal-specific	0	0	-0.0755071	1	0.358	0.324022	3.789	0.495909	1.838	0.571273
ENSG00000065911	protein coding	pre-existing	0	1	-0.88694	0	1.286	0.495334	1.053	0.533713	3.895	0.602567
ENSG00000066084	protein coding	pre-existing	0	1	-0.653786	0	0.156	0.275641	4.731	0.497781	3.818	0.62153
ENSG00000066135	protein coding	pre-existing	0	1	-0.693314	2	0.178	0.398876	3.195	0.497027	1.148	0.489547
ENSG00000066654	protein coding	de-novo	1	0	-1.03605	4	0.345	0.394203	1.062	0.532015	3.216	0.633085
ENSG00000066855	protein coding	de-novo	1	0	-1.32814	0	0.131	0.48855	1.002	0.535928	1.518	0.671937
ENSG00000067057	protein coding	basal-specific	0	0	2.3316	0	0.419	0.424821	2.508	0.413477	2.376	0.429714
ENSG00000067064	protein coding	de-novo	1	0	0.330438	0	0.651	0.385561	0.855	0.556725	2.035	0.646683
ENSG00000067225	protein coding	basal-specific	0	0	-1.10401	0	0.5	0.282	1.818	0.443344	1.839	0.4323
ENSG00000067334	protein coding	de-novo	1	0	-2.0002	0	0.058	0.344828	2.271	0.600176	3.567	0.606392
ENSG00000067369	protein coding	basal-specific	0	0	-0.714907	7	0.253	0.44664	5.934	0.518537	4.322	0.584452
ENSG00000067533	protein coding	de-novo	1	0	-1.08406	1	0.024	0.416667	0.849	0.570082	6.892	0.659025
ENSG00000067596	protein coding	pre-existing	1	1	-0.665115	3	0.173	0.473988	3.663	0.493311	1.823	0.508502
ENSG00000067704	protein coding	pre-existing	1	1	-2.47688	0	0.085	0.294118	3.039	0.556433	0.406	0.682266
ENSG00000068097	protein coding	basal-specific	0	0	-0.457896	3			3.546	0.516356	2.555	0.520548
ENSG00000068120	protein coding	basal-specific	0	0	-0.39526	0	0.647	0.408037	1.782	0.407969	0.309	0.436893
ENSG00000068305	protein coding	de-novo	1	0	-0.524842	2	0.629	0.473768	1.536	0.505208	3.717	0.638956
ENSG00000068366	protein coding	de-novo	1	1	0.56246	0	0.393	0.483461	2.136	0.585674	2.694	0.69265
ENSG00000068394	protein coding	basal-specific	0	0	-0.23418	0	0.013	0.538462	1.431	0.410203	0.214	0.542056
ENSG00000068654	protein coding	pre-existing	0	1	-1.00677	3	0.379	0.538259	5.163	0.463297	7.207	0.494242
ENSG00000068912	protein coding	de-novo	1	0	-0.989583	0	0.202	0.30198	1.452	0.569559	3.611	0.602049
ENSG00000069248	protein coding	pre-existing	1	0	-1.32729	0	0.092	0.391304	3.471	0.557188	1.645	0.58541
ENSG00000069329	protein coding	basal-specific	0	0	-0.276301	0	0.061	0.262295	2.391	0.58302	4.849	0.595587
ENSG00000069345	protein coding	de-novo	1	0	-0.225931	0	1.482	0.603914	1.239	0.544794	1.667	0.660468
ENSG00000069869	protein coding	basal-specific	0	0	0.150651	1	0.3	0.606667	3.96	0.588636	5.382	0.626719
ENSG00000069956	protein coding	de-novo	1	0	-1.56374	2	0.964	0.578838	2.166	0.595106	2.375	0.666526
ENSG00000070061	protein coding	pre-existing	1	1	-1.32294	0	0.717	0.403068	4.041	0.539223	6.645	0.583898
ENSG00000070366	protein coding	basal-specific	0	0	-0.601142	1	0.295	0.559322	4.26	0.463615	1.649	0.412371
ENSG00000070814	protein coding	pre-existing	0	1	-0.519534	3	0.118	0.245763	4.47	0.404027	0.647	0.437403
ENSG00000071054	protein coding	basal-specific	0	0	-1.38666	2	0.374	0.23262	4.155	0.497954	3.441	0.602151
ENSG00000071537	protein coding	de-novo	1	1	-0.566385	4	0.109	0.311927	2.385	0.532495	5.425	0.645161
ENSG00000071794	protein coding	basal-specific	0	0	-0.0576728	0	0.218	0.362385	3.03	0.616832	2.093	0.683708
ENSG00000071894	protein coding	basal-specific	0	0	-0.520166	0	0.13	0.161538	4.332	0.375808	0.11	0.354545
ENSG00000072110	protein coding	basal-specific	0	0	0.856956	0	0.477	0.29979	2.793	0.423559	2.75	0.462182
ENSG00000072121	protein coding	basal-specific	0	0	-2.60174	6	0.14	0.478571	7.665	0.461318	6.001	0.468255
ENSG00000072274	protein coding	de-novo	1	0	-1.12638	1	0.731	0.487004	2.388	0.551926	4.6	0.598261
ENSG00000072501	protein coding	pre-existing	0	1	-0.0718952	4	0.34	0.417647	3.702	0.496218	5.954	0.554417
ENSG00000072803	protein coding	de-novo	1	1	-0.624676	0	0.371	0.285714	1.692	0.54078	2.578	0.598526
ENSG00000073050	protein coding	basal-specific	0	0	1.00718	0	0.105	0.333333	1.902	0.408517	0.313	0.354633
ENSG00000073111	protein coding	pre-existing	0	1	-0.130966	2	0.308	0.551948	2.715	0.40884	2.349	0.419753
ENSG00000073578	protein coding	pre-existing	0	1	0.0954474	0	0.053	0.264151	1.995	0.443108	0.662	0.583082
ENSG00000073584	protein coding	de-novo	1	0	-0.380386	0	0.988	0.402834	1.236	0.514563	3.823	0.603714
ENSG00000073614	protein coding	pre-existing	1	1	-1.57719	8	0.229	0.419214	5.073	0.533609	5.399	0.617151
ENSG00000073712	protein coding	pre-existing	1	0	0.432307	0	0.355	0.695775	2.064	0.57219	1.109	0.677187
ENSG00000074054	protein coding	basal-specific	0	0	-1.20124	2	0.39	0.535897	4.68	0.509829	3.085	0.547164
ENSG00000074603	protein coding	de-novo	1	0	-1.05817	1	1.581	0.588235	2.697	0.586207	4.421	0.646234
ENSG00000074695	protein coding	de-novo	1	0	-0.2988	0	0.021	0.428571	1.533	0.545988	3.27	0.669113
ENSG00000074696	protein coding	de-novo	1	0	#N/A	1	0.765	0.431373	1.203	0.559435	1.97	0.603553
ENSG00000074755	protein coding	basal-specific	0	0	-1.3248	3	0.135	0.237037	8.886	0.477605	2.445	0.442127
ENSG00000075413	protein coding	de-novo	1	0	-1.26751	1	0.895	0.367598	2.391	0.545379	3.227	0.550976
ENSG00000075624	protein coding	basal-specific	0	0	1.57736	1	0.319	0.432602	1.128	0.394504	1.383	0.482285
ENSG00000075856	protein coding	pre-existing	0	1	-0.783674	2	0.246	0.52439	2.946	0.474881	2.915	0.50223
ENSG00000075945	protein coding	de-novo	1	1	0.0326589	0	1.502	0.636485	2.379	0.606137	0.35	0.657143
ENSG00000076003	protein coding	de-novo	0	1	-0.263374	0	0.078	0.423077	2.466	0.538118	1.209	0.638544
ENSG00000076108	protein coding	basal-specific	0	0	0.00692891	0	0.327	0.29052	5.718	0.455929	3.022	0.520847
ENSG00000076382	protein coding	pre-existing	0	1	-0.975057	2	0.079	0.443038	3.582	0.497767	0.626	0.485623
ENSG00000076924	protein coding	basal-specific	0	0	1.37598	0			2.568	0.383956	0.061	0.360656
ENSG00000076928	protein coding	basal-specific	0	0	0.770599	0	0.125	0.224	2.952	0.359756	1.947	0.370313
ENSG00000077147	protein coding	de-novo	1	0	-0.473511	1	0.177	0.180791	1.77	0.603955	4.153	0.671563
ENSG00000077150	protein coding	basal-specific	0	0	1.08989	0	0.563	0.30373	2.703	0.388457	0.148	0.432432
ENSG00000077152	protein coding	de-novo	1	0	0.294725	0	0.194	0.407216	0.594	0.550505	0.551	0.582577
ENSG00000077232	protein coding	de-novo	1	0	-2.51924	0	0.432	0.462963	2.382	0.611671	20.072	0.632124
ENSG00000077235	protein coding	pre-existing	0	1	-0.839302	3	0.023	0.304348	6.33	0.438231	0.737	0.415197
ENSG00000077254	protein coding	pre-existing	1	0	-0.772909	0	0.347	0.403458	2.829	0.609756	1.496	0.629679
ENSG00000077458	protein coding	de-novo	1	0	-1.47738	0	0.613	0.704731	1.02	0.588235	2.984	0.704088
ENSG00000077684	protein coding	de-novo	0	1	#N/A	6	0.479	0.551148	2.529	0.482404	2.962	0.645847
ENSG00000078053	protein coding	basal-specific	0	0	0.476753	0	0.069	0.188406	2.088	0.475575	1.114	0.591562
ENSG00000078140	protein coding	de-novo	1	0	1.15116	0	0.219	0.30137	0.603	0.573798	4.358	0.66246
ENSG00000078177	protein coding	de-novo	1	0	-1.79435	2	0.392	0.464286	5.313	0.614719	9.118	0.648826
ENSG00000078618	protein coding	basal-specific	0	0	#N/A	2	0.19	0.294737	3.66	0.55765	0.045	0.644444
ENSG00000079246	protein coding	de-novo	1	0	0.226163	0	0.461	0.388286	2.199	0.574352	1.101	0.595822
ENSG00000079332	protein coding	de-novo	1	0	0.671076	2	0.358	0.617318	0.597	0.556114	5.187	0.577405
ENSG00000079616	protein coding	basal-specific	0	0	-0.217311	0	0.625	0.44	2.04	0.414706	1.689	0.471285
ENSG00000079785	protein coding	basal-specific	0	0	-0.475608	0	0.402	0.338308	2.223	0.576698	2.865	0.629319
ENSG00000079805	protein coding	basal-specific	0	0	0.26896	0	0.399	0.406015	2.613	0.411022	0.856	0.344626
ENSG00000079819	protein coding	pre-existing	0	1	-0.0494212	0	2.5	0.6276	3.018	0.522531	1.257	0.630867
ENSG00000080503	protein coding	basal-specific	0	0	0.0444275	0	0.52	0.598077	4.773	0.486067	5.971	0.603584
ENSG00000080819	protein coding	de-novo	0	1	-0.325085	0	0.144	0.340278	1.365	0.429304	1.237	0.666936
ENSG00000080824	protein coding	de-novo	0	1	0.482255	1	0.295	0.284746	2.565	0.553606	1.553	0.57888
ENSG00000081913	protein coding	basal-specific	0	0	-0.251462	5	0.143	0.293706	5.154	0.410167	1.002	0.59481
ENSG00000082153	protein coding	de-novo	1	0	-0.719924	0	0.411	0.36983	1.356	0.569322	5.16	0.635078
ENSG00000082516	protein coding	de-novo	1	1	-0.633935	4	0.078	0.384615	4.527	0.509167	0.799	0.634543
ENSG00000083168	protein coding	basal-specific	0	0	-1.30413	12	0.817	0.589963	6.021	0.506893	2.794	0.534717
ENSG00000083312	protein coding	de-novo	1	0	-0.857176	0	0.426	0.28169	2.697	0.583241	8.001	0.661292
ENSG00000083520	protein coding	de-novo	1	1	-1.17151	0	0.818	0.44621	2.877	0.588113	7.626	0.618935
ENSG00000083720	protein coding	pre-existing	1	1	0.875106	0	0.233	0.626609	1.563	0.539987	1.664	0.635817
ENSG00000083799	protein coding	de-novo	1	0	-1.85542	2	0.439	0.530752	2.871	0.574016	5.427	0.619495
ENSG00000083857	protein coding	de-novo	1	0	-1.41733	31	0.387	0.364341	13.767	0.536137	0.798	0.632832
ENSG00000084090	protein coding	de-novo	1	1	-1.81431	2	0.393	0.279898	1.113	0.463612	1.871	0.582576
ENSG00000084093	protein coding	de-novo	1	0	-0.487477	9	0.407	0.464373	3.294	0.544323	6.013	0.624647
ENSG00000084234	protein coding	pre-existing	1	1	-0.096341	1	0.141	0.382979	2.292	0.483421	1.78	0.482022
ENSG00000084463	protein coding	basal-specific	0	0	0.205844	0	0.335	0.567164	1.926	0.497404	2.483	0.662102
ENSG00000084652	protein coding	pre-existing	0	1	-0.411222	4	0.281	0.405694	1.641	0.427179	3.09	0.488997
ENSG00000084754	protein coding	basal-specific	0	0	-0.70629	0	0.076	0.381579	2.379	0.519966	2.849	0.511759
ENSG00000084774	protein coding	basal-specific	0	0	-0.444657	0	0.183	0.295082	6.678	0.423181	0.425	0.468235
ENSG00000085185	protein coding	basal-specific	0	0	0.921288	1	0.382	0.387435	5.358	0.413214	1.935	0.497674
ENSG00000085377	protein coding	basal-specific	0	0	0.793365	2	0.963	0.563863	2.133	0.52977	4.926	0.581811
ENSG00000085415	protein coding	de-novo	1	0	-0.0426767	0	0.555	0.430631	1.266	0.538705	2.284	0.66944
ENSG00000085491	protein coding	de-novo	0	1	-0.439689	2	0.711	0.344585	1.434	0.548815	2.846	0.659522
ENSG00000085662	protein coding	basal-specific	0	0	1.14698	0	0.04	0.225	0.951	0.453207	1.02	0.494118
ENSG00000085721	protein coding	basal-specific	0	0	-0.562285	1	0.078	0.333333	1.956	0.561861	1.711	0.623612
ENSG00000085788	protein coding	de-novo	1	0	-1.31817	0	0.927	0.632147	2.136	0.567884	2.263	0.631021
ENSG00000085840	protein coding	basal-specific	0	0	-0.924007	0	0.183	0.404372	2.586	0.493426	0.352	0.539773
ENSG00000085872	protein coding	basal-specific	0	0	2.43407	5	0.059	0.237288	2.784	0.353807	1.265	0.478261
ENSG00000086061	protein coding	de-novo	1	0	-0.432447	2	0.121	0.322314	1.194	0.567839	1.004	0.65239
ENSG00000086102	protein coding	basal-specific	0	0	-1.34302	4	0.057	0.403509	3.363	0.515314	1.179	0.568278
ENSG00000086475	protein coding	de-novo	1	1	-0.164918	2	0.372	0.236559	1.179	0.478372	1.714	0.632439
ENSG00000086598	protein coding	de-novo	1	0	0.522929	0	1.26	0.580952	0.606	0.521452	1.853	0.64436
ENSG00000086758	protein coding	pre-existing	0	1	-1.24551	3	0.594	0.461279	13.125	0.4896	1.213	0.57296
ENSG00000086827	protein coding	basal-specific	0	0	-0.874565	0	0.069	0.289855	2.34	0.574359	0.691	0.575977
ENSG00000087274	protein coding	pre-existing	1	0	0.226737	0	0.863	0.478563	2.4	0.474583	1.902	0.448475
ENSG00000087365	protein coding	pre-existing	0	1	-0.418832	0	0.19	0.336842	2.688	0.438988	0.563	0.513321
ENSG00000087502	protein coding	de-novo	1	0	-0.807119	0	0.613	0.438825	1.134	0.626102	3.804	0.661935
ENSG00000088205	protein coding	de-novo	1	0	-0.886069	0	0.087	0.448276	2.013	0.582216	1.653	0.641863
ENSG00000088305	protein coding	basal-specific	0	0	-0.857396	0	0.321	0.211838	2.562	0.439891	2.965	0.508938
ENSG00000088325	protein coding	basal-specific	0	0	-0.763756	0	0.528	0.44697	2.352	0.543793	0.725	0.555862
ENSG00000088812	protein coding	de-novo	0	1	-0.626405	4	0.09	0.255556	4.29	0.500233	4.271	0.554905
ENSG00000088930	protein coding	basal-specific	0	0	-0.66284	0	0.068	0.279412	2.853	0.557308	0.487	0.702259
ENSG00000089154	protein coding	basal-specific	0	0	#N/A	2			8.016	0.428393	0.647	0.544049
ENSG00000089737	protein coding	basal-specific	0	0	0.154808	10	0.116	0.413793	2.58	0.505426	2.904	0.511364
ENSG00000089876	protein coding	de-novo	0	1	-0.624112	1	0.935	0.614973	2.232	0.5681	0.35	0.642857
ENSG00000090612	protein coding	de-novo	1	0	-1.24924	4	0.467	0.443255	2.844	0.58685	10.302	0.586294
ENSG00000090861	protein coding	pre-existing	0	1	-0.138103	2	0.18	0.344444	3	0.466	3.324	0.468111
ENSG00000090863	protein coding	de-novo	0	1	-0.58229	4	0.379	0.614776	3.612	0.492525	5.727	0.497643
ENSG00000090889	protein coding	pre-existing	1	1	-0.694807	0	0.068	0.397059	3.699	0.53582	0.621	0.565217
ENSG00000090989	protein coding	basal-specific	0	0	-0.800665	0	0.316	0.35443	2.685	0.598883	0.591	0.685279
ENSG00000091136	protein coding	de-novo	0	1	1.57774	0	0.568	0.434859	5.361	0.505503	5.149	0.51408
ENSG00000091483	protein coding	de-novo	0	1	-0.387886	0	0.077	0.363636	1.533	0.540117	1.646	0.671932
ENSG00000091527	protein coding	de-novo	1	0	0.0280438	2	0.359	0.211699	0.777	0.460746	3.086	0.613415
ENSG00000091651	protein coding	de-novo	1	0	0.0233981	1	0.287	0.491289	0.759	0.528327	0.809	0.563659
ENSG00000091656	protein coding	basal-specific	0	0	-1.81293	18	0.42	0.57619	10.851	0.520689	2.716	0.662371
ENSG00000092199	protein coding	de-novo	1	0	-0.502509	0	2.952	0.628049	0.921	0.520087	2.201	0.63562
ENSG00000092201	protein coding	pre-existing	0	1	-1.07359	1	0.092	0.293478	3.144	0.563613	1.197	0.56391
ENSG00000092203	protein coding	basal-specific	0	0	0.239593	0	0.276	0.398551	1.866	0.48821	2.569	0.585442
ENSG00000092621	protein coding	basal-specific	0	0	-0.0383308	0	0.833	0.412965	1.602	0.413233	1.611	0.426443
ENSG00000092820	protein coding	pre-existing	0	1	0.660432	1	0.134	0.380597	1.761	0.458262	1.173	0.557545
ENSG00000092853	protein coding	pre-existing	0	1	-0.756909	6	0.108	0.361111	4.02	0.565423	4.384	0.559991
ENSG00000093000	protein coding	de-novo	1	0	-0.830498	5	0.561	0.404635	1.407	0.550817	3.362	0.611243
ENSG00000094804	protein coding	pre-existing	1	0	-0.678381	0	0.239	0.393305	1.683	0.553773	2.656	0.565889
ENSG00000094880	protein coding	pre-existing	0	1	0.234687	0	0.031	0.419355	1.794	0.539576	1.328	0.60994
ENSG00000094975	protein coding	de-novo	1	0	-2.57191	4	1.847	0.557661	4.218	0.579422	1.574	0.665184
ENSG00000095002	protein coding	de-novo	1	0	-0.450197	0	0.139	0.374101	2.817	0.572595	5.045	0.537364
ENSG00000095139	protein coding	pre-existing	1	0	0.249241	1	0.165	0.375758	1.659	0.558168	2.319	0.587753
ENSG00000095319	protein coding	basal-specific	0	0	-0.176939	0	0.021	0.190476	5.25	0.478095	0.418	0.447368
ENSG00000096696	protein coding	basal-specific	0	0	-0.640135	13	0.299	0.257525	8.616	0.516713	0.836	0.673445
ENSG00000096717	protein coding	de-novo	1	0	-0.589032	1	0.432	0.409722	2.244	0.526292	1.797	0.688926
ENSG00000097033	protein coding	de-novo	1	0	0.881916	0	0.488	0.348361	1.185	0.586498	4.949	0.633057
ENSG00000099246	protein coding	de-novo	1	0	1.44859	1	0.511	0.540117	0.708	0.587571	4.595	0.642437
ENSG00000099783	protein coding	pre-existing	0	1	0.589287	3	0.232	0.288793	2.193	0.444596	2.051	0.462701
ENSG00000099821	protein coding	basal-specific	0	0	-0.788763	0	0.025	0.24	3.693	0.337666	0.782	0.327366
ENSG00000099942	protein coding	de-novo	1	0	-0.47664	11	0.528	0.276515	0.912	0.464912	3.902	0.548949
ENSG00000099991	protein coding	basal-specific	0	0	-1.86022	2	0.387	0.366925	6.663	0.413928	0.432	0.375
ENSG00000099995	protein coding	basal-specific	0	0	0.740706	0	0.127	0.283465	2.382	0.438707	2.606	0.549501
ENSG00000100029	protein coding	pre-existing	0	1	-0.805796	2	0.992	0.431452	1.767	0.433503	0.421	0.389549
ENSG00000100201	protein coding	de-novo	1	0	-0.710426	4	0.1	0.38	2.196	0.482696	2.497	0.612735
ENSG00000100234	protein coding	de-novo	1	0	2.1526	0	0.297	0.225589	0.636	0.415094	3.664	0.553766
ENSG00000100266	protein coding	pre-existing	0	1	0.3544	2	0.405	0.558025	1.461	0.429843	1.589	0.510384
ENSG00000100280	protein coding	basal-specific	0	0	0.573257	0	0.187	0.283422	2.85	0.417193	1.141	0.407537
ENSG00000100281	protein coding	de-novo	1	0	-1.49563	0	0.473	0.534884	1.806	0.529347	3.798	0.576619
ENSG00000100284	protein coding	basal-specific	0	0	0.274895	1	0.166	0.433735	1.482	0.401484	2.339	0.397606
ENSG00000100296	protein coding	basal-specific	0	0	-0.997864	0	0.711	0.485232	2.052	0.474659	2.578	0.532583
ENSG00000100297	protein coding	basal-specific	0	0	0.394239	1	0.099	0.393939	2.205	0.401361	1.176	0.505952
ENSG00000100304	protein coding	basal-specific	0	0	-0.712019	0	0.285	0.396491	1.935	0.370543	1.386	0.414141
ENSG00000100324	protein coding	basal-specific	0	0	-0.0515671	5	0.023	0.304348	1.515	0.392739	1.66	0.404819
ENSG00000100345	protein coding	pre-existing	0	1	0.219508	0	0.214	0.303738	5.946	0.409519	1.388	0.466859
ENSG00000100353	protein coding	basal-specific	0	0	-0.109463	0	0.21	0.452381	1.647	0.488767	0.567	0.47619
ENSG00000100412	protein coding	basal-specific	0	0	-0.417103	1	0.517	0.466151	2.418	0.423904	3.167	0.437322
ENSG00000100422	protein coding	de-novo	0	1	-1.17956	1	0.104	0.134615	1.614	0.428748	2.724	0.512115
ENSG00000100425	protein coding	basal-specific	0	0	-0.670886	5	0.487	0.435318	3.57	0.416527	1.521	0.532544
ENSG00000100426	protein coding	de-novo	1	0	-1.53816	11	0.475	0.454737	3.516	0.445677	2.902	0.558925
ENSG00000100462	protein coding	basal-specific	0	0	-0.265045	0	0.291	0.570447	1.914	0.479624	1.581	0.485769
ENSG00000100504	protein coding	de-novo	1	0	-1.44384	1	0.08	0.1875	2.544	0.511006	0.198	0.59596
ENSG00000100528	protein coding	de-novo	1	0	#N/A	0	0.064	0.234375	0.483	0.569358	4.253	0.649659
ENSG00000100592	protein coding	basal-specific	0	0	-0.959028	1	0.139	0.489209	3.237	0.556688	2.546	0.670463
ENSG00000100603	protein coding	basal-specific	0	0	-0.375882	0	0.102	0.490196	1.716	0.543124	1.742	0.557979
ENSG00000100644	protein coding	de-novo	1	0	0.683133	0	0.292	0.321918	2.553	0.597728	1.319	0.691433
ENSG00000100664	protein coding	de-novo	1	0	-1.5322	0	0.912	0.482456	1.296	0.578704	3.973	0.615656
ENSG00000100697	protein coding	de-novo	1	0	-2.13213	4	0.444	0.515766	5.769	0.57289	6.674	0.619119
ENSG00000100714	protein coding	basal-specific	0	0	-0.00603665	0	0.937	0.498399	2.895	0.511226	3.522	0.548836
ENSG00000100764	protein coding	basal-specific	0	0	0.495376	0	0.142	0.528169	1.323	0.543462	3.022	0.503971
ENSG00000100796	protein coding	de-novo	1	1	#N/A	0	0.833	0.266507	2.502	0.59952	1.251	0.645883
ENSG00000100811	protein coding	de-novo	1	1	0.568059	0	0.534	0.217228	1.245	0.416064	5.188	0.55744
ENSG00000100883	protein coding	de-novo	1	0	0.313031	0	0.612	0.457516	1.515	0.609241	1.654	0.617896
ENSG00000100888	protein coding	pre-existing	1	1	-1.70279	8	0.395	0.448101	7.746	0.508521	0.774	0.52584
ENSG00000100889	protein coding	basal-specific	0	0	0.487767	2	0.918	0.344227	1.923	0.404056	0.528	0.403409
ENSG00000100906	protein coding	de-novo	1	0	0.1976	0	0.385	0.290909	0.954	0.408805	1.075	0.523721
ENSG00000100934	protein coding	pre-existing	1	0	-0.415245	0	1.203	0.62261	2.298	0.56745	1.32	0.717424
ENSG00000100983	protein coding	basal-specific	0	0	-0.263881	0	0.928	0.476293	1.425	0.436491	1.227	0.455583
ENSG00000100991	protein coding	basal-specific	0	0	-0.625692	1	0.026	0.423077	2.394	0.484545	0.742	0.413747
ENSG00000100994	protein coding	basal-specific	0	0	-0.670706	0	0.094	0.297872	2.532	0.412717	1.49	0.42953
ENSG00000101003	protein coding	de-novo	1	0	0.46628	1	0.543	0.495396	0.609	0.530378	3.081	0.597858
ENSG00000101040	protein coding	basal-specific	0	0	0.210723	8	0.403	0.521092	3.726	0.483629	1.547	0.592114
ENSG00000101126	protein coding	de-novo	1	1	-0.511468	5	1.562	0.639565	3.525	0.560284	2.489	0.611491
ENSG00000101161	protein coding	basal-specific	0	0	-0.398418	0	0.114	0.403509	2.826	0.429936	0.107	0.448598
ENSG00000101166	protein coding	de-novo	1	0	#N/A	0	0.075	0.306667	0.585	0.57265	1.862	0.675618
ENSG00000101191	protein coding	basal-specific	0	0	-1.37073	12	0.356	0.449438	6.723	0.407705	3.717	0.466774
ENSG00000101193	protein coding	de-novo	0	1	0.0416191	4	0.119	0.285714	0.687	0.494905	3.563	0.525119
ENSG00000101310	protein coding	pre-existing	0	1	1.20978	0	0.49	0.395918	2.304	0.519097	0.675	0.693333
ENSG00000101343	protein coding	basal-specific	0	0	-0.642795	0	0.124	0.443548	2.547	0.533962	3.836	0.61001
ENSG00000101346	protein coding	de-novo	1	0	-0.288444	3	0.062	0.225806	1.167	0.416452	3.997	0.528396
ENSG00000101347	protein coding	basal-specific	0	0	-0.443301	0	0.25	0.332	1.881	0.567251	4.053	0.546015
ENSG00000101367	protein coding	de-novo	1	0	0.219777	0	0.078	0.346154	0.807	0.534077	1.677	0.595707
ENSG00000101452	protein coding	pre-existing	0	1	-1.15066	0	0.069	0.289855	2.112	0.513731	2.977	0.510245
ENSG00000101493	protein coding	de-novo	0	1	-0.315946	5	0.37	0.354054	3.492	0.341065	4.816	0.565199
ENSG00000101544	protein coding	de-novo	1	0	-1.27967	7	0.309	0.352751	3.396	0.496172	1.537	0.638907
ENSG00000101557	protein coding	de-novo	1	0	1.46276	0	0.418	0.461722	1.485	0.59798	3.345	0.639462
ENSG00000101558	protein coding	de-novo	1	0	0.63931	0	0.241	0.257261	0.885	0.562712	5.81	0.653701
ENSG00000101752	protein coding	basal-specific	0	0	-2.3146	2	0.792	0.238636	3.021	0.539887	6.287	0.68236
ENSG00000101773	protein coding	de-novo	1	0	-1.73552	3	0.532	0.552632	2.709	0.606128	0.47	0.582979
ENSG00000101811	protein coding	basal-specific	0	0	-0.457256	0	0.082	0.402439	1.794	0.45262	0.81	0.666667
ENSG00000101868	protein coding	basal-specific	0	0	-1.53801	0	0.053	0.301887	4.407	0.571818	4.857	0.567223
ENSG00000101928	protein coding	de-novo	1	0	-0.763085	0	0.177	0.525424	0.645	0.584496	1.529	0.661216
ENSG00000101966	protein coding	de-novo	1	0	-0.178028	2	0.306	0.343137	1.494	0.598394	6.791	0.624061
ENSG00000101972	protein coding	basal-specific	0	0	-1.00591	0	0.51	0.535294	3.807	0.604676	4.394	0.643605
ENSG00000102024	protein coding	de-novo	1	0	-0.959318	1	0.226	0.59292	1.893	0.584258	2.641	0.580462
ENSG00000102038	protein coding	pre-existing	1	1	0.22495	0	0.13	0.330769	3.213	0.583256	0.804	0.689055
ENSG00000102054	protein coding	basal-specific	0	0	0.875889	0	0.427	0.409836	1.41	0.540426	0.694	0.646974
ENSG00000102098	protein coding	de-novo	1	0	0.457139	0	0.227	0.603524	2.103	0.555397	2.058	0.660836
ENSG00000102144	protein coding	de-novo	1	0	0.712287	0	0.116	0.5	1.254	0.497608	3.465	0.603463
ENSG00000102178	protein coding	de-novo	0	1	0.296457	6	0.031	0.16129	0.543	0.38674	1.822	0.444566
ENSG00000102181	protein coding	de-novo	0	1	-0.0901124	5	0.228	0.210526	0.819	0.446886	4.455	0.487767
ENSG00000102226	protein coding	basal-specific	0	0	1.47079	0	0.656	0.452744	2.892	0.430498	0.398	0.452261
ENSG00000102241	protein coding	pre-existing	0	1	-1.61183	1	0.422	0.279621	2.268	0.558201	0.333	0.687688
ENSG00000102471	protein coding	de-novo	1	0	0.590982	0	0.275	0.269091	1.011	0.478734	4.256	0.681156
ENSG00000102580	protein coding	de-novo	1	0	-0.903903	0	0.117	0.273504	1.515	0.591419	3.958	0.614704
ENSG00000102606	protein coding	de-novo	1	0	-0.0447383	2	0.908	0.274229	2.589	0.494399	2.863	0.586448
ENSG00000102753	protein coding	de-novo	1	0	1.15703	1	0.176	0.232955	1.566	0.58493	2.48	0.658871
ENSG00000102763	protein coding	basal-specific	0	0	-1.78645	1	0.105	0.228571	5.718	0.551242	1.362	0.64978
ENSG00000102900	protein coding	pre-existing	1	0	-0.807417	0	0.629	0.54531	2.643	0.480893	5.677	0.541131
ENSG00000102974	protein coding	pre-existing	1	1	-0.972037	6	0.767	0.481095	2.184	0.509158	1.677	0.566488
ENSG00000103047	protein coding	basal-specific	0	0	-1.50031	4	0.087	0.321839	3.285	0.499543	1.521	0.537147
ENSG00000103051	protein coding	basal-specific	0	0	-0.769753	0	0.029	0.344828	2.403	0.471494	2.814	0.465529
ENSG00000103126	protein coding	de-novo	0	1	-1.3072	4	0.436	0.220183	2.589	0.378911	0.682	0.404692
ENSG00000103194	protein coding	de-novo	1	1	-1.19706	4	0.196	0.397959	2.409	0.505189	2.785	0.540395
ENSG00000103342	protein coding	de-novo	1	0	-1.15901	1	0.236	0.292373	1.914	0.509404	4.991	0.634743
ENSG00000103544	protein coding	basal-specific	0	0	-0.397932	3	0.563	0.531083	3.159	0.496043	1.492	0.530831
ENSG00000103549	protein coding	pre-existing	0	1	-1.32812	8	0.378	0.293651	3.006	0.401863	2.193	0.382125
ENSG00000103550	protein coding	de-novo	1	0	-1.32261	6	0.783	0.445722	1.377	0.479303	4.973	0.521215
ENSG00000103591	protein coding	de-novo	0	1	-0.745124	0	0.516	0.453488	0.948	0.547468	2.154	0.586351
ENSG00000103657	protein coding	basal-specific	0	0	-1.7756	4	0.517	0.485493	14.586	0.526327	0.463	0.671706
ENSG00000104133	protein coding	basal-specific	0	0	-1.04283	2	0.041	0.365854	7.332	0.556192	4.5	0.548667
ENSG00000104142	protein coding	basal-specific	0	0	0.3538	11	0.319	0.388715	2.922	0.386721	0.634	0.44164
ENSG00000104164	protein coding	de-novo	1	0	-0.52745	0	0.589	0.517827	0.534	0.586142	3.196	0.64393
ENSG00000104267	protein coding	de-novo	1	0	-2.09248	1	0.114	0.27193	0.783	0.505747	0.704	0.698864
ENSG00000104320	protein coding	de-novo	1	0	-1.8924	0	0.585	0.529915	2.349	0.621541	6.515	0.64881
ENSG00000104331	protein coding	de-novo	1	0	-0.742248	2	0.282	0.223404	1.08	0.468519	5.862	0.650972
ENSG00000104343	protein coding	de-novo	1	0	-0.143286	0	0.053	0.320755	0.576	0.557292	7.883	0.658886
ENSG00000104356	protein coding	de-novo	0	1	-1.11276	3	0.1	0.38	3.075	0.498862	1.564	0.611893
ENSG00000104517	protein coding	basal-specific	0	0	-1.81961	0	0.525	0.253333	8.4	0.55619	2.029	0.687531
ENSG00000104549	protein coding	de-novo	1	0	0.0568408	1	0.899	0.419355	1.725	0.561159	0.338	0.707101
ENSG00000104613	protein coding	de-novo	1	0	-1.21725	0	0.147	0.244898	2.133	0.549461	0.727	0.544704
ENSG00000104635	protein coding	de-novo	0	1	0.800204	2	0.418	0.454545	1.479	0.450304	3.038	0.573074
ENSG00000104660	protein coding	de-novo	1	0	2.73533	0	0.21	0.438095	0.51	0.515686	2.662	0.658152
ENSG00000104738	protein coding	pre-existing	0	1	0.202343	1	0.209	0.263158	2.715	0.494659	2.666	0.518005
ENSG00000105176	protein coding	de-novo	1	0	-0.889427	1	0.415	0.566265	1.608	0.561567	2.076	0.615607
ENSG00000105186	protein coding	de-novo	0	1	-0.693709	4	0.842	0.27791	3.153	0.480495	2.002	0.442058
ENSG00000105357	protein coding	basal-specific	0	0	0.703219	0	0.125	0.36	6.111	0.356897	0.752	0.418883
ENSG00000105486	protein coding	basal-specific	0	0	-1.11663	0	0.42	0.321429	2.76	0.397101	3.721	0.440742
ENSG00000105568	protein coding	basal-specific	0	0	0.705446	0	1.061	0.479736	1.77	0.409605	3.537	0.493073
ENSG00000105793	protein coding	de-novo	1	0	-0.295635	0	0.148	0.533784	1.164	0.614261	6.527	0.650375
ENSG00000105849	protein coding	de-novo	1	0	-0.666356	0	0.021	0.428571	1.017	0.53884	2.855	0.664448
ENSG00000105953	protein coding	basal-specific	0	0	0.201372	3	0.156	0.461538	3.117	0.442733	1.067	0.421743
ENSG00000106070	protein coding	de-novo	0	1	-1.23465	2	0.799	0.314143	1.899	0.461295	4.701	0.51053
ENSG00000106080	protein coding	de-novo	1	0	-1.18279	0	0.194	0.541237	0.636	0.583333	4.148	0.62054
ENSG00000106105	protein coding	basal-specific	0	0	-0.885945	0	0.257	0.428016	2.238	0.526363	2.278	0.565847
ENSG00000106263	protein coding	pre-existing	0	1	-0.514896	0	0.614	0.413681	2.445	0.446217	0.556	0.397482
ENSG00000106346	protein coding	basal-specific	0	0	-0.640458	7	0.48	0.627083	3.951	0.448494	4.337	0.451925
ENSG00000106460	protein coding	de-novo	1	0	-0.343682	0	0.421	0.4038	0.825	0.618182	11.392	0.669593
ENSG00000106799	protein coding	de-novo	1	0	-1.0902	0	0.338	0.612426	1.524	0.551837	4.887	0.638633
ENSG00000107104	protein coding	basal-specific	0	0	-0.181356	6	1.001	0.468531	4.128	0.47311	2.443	0.537863
ENSG00000107164	protein coding	pre-existing	1	1	0.927515	0	0.104	0.182692	1.719	0.452589	4.855	0.563337
ENSG00000107186	protein coding	basal-specific	0	0	-0.970155	0	0.35	0.34	6.255	0.544844	2.282	0.535495
ENSG00000107290	protein coding	de-novo	1	0	-1.63201	8	0.184	0.456522	8.034	0.591486	2.883	0.592438
ENSG00000107362	protein coding	de-novo	1	0	-0.512481	3	0.563	0.291297	0.882	0.581633	1.635	0.670948
ENSG00000107372	protein coding	de-novo	1	0	0.313736	1	0.659	0.312595	0.642	0.554517	4.54	0.620264
ENSG00000107560	protein coding	de-novo	1	0	-1.59661	3	0.778	0.277635	1.599	0.58474	4.082	0.688878
ENSG00000107581	protein coding	pre-existing	0	1	-0.767164	7	0.147	0.29932	4.149	0.52832	2.369	0.654707
ENSG00000107625	protein coding	basal-specific	0	0	-0.565832	0	0.099	0.282828	2.214	0.577236	0.848	0.621462
ENSG00000107643	protein coding	de-novo	1	0	-1.1633	0	0.479	0.453027	1.284	0.573988	4.465	0.646809
ENSG00000107651	protein coding	pre-existing	0	1	-0.0777823	1	0.053	0.320755	3.003	0.548119	4.092	0.607283
ENSG00000107745	protein coding	pre-existing	1	0	0.325585	0	0.303	0.660066	1.449	0.547274	1.194	0.502513
ENSG00000107789	protein coding	de-novo	1	0	0.615644	2	0.372	0.658602	1.464	0.490437	1.203	0.664173
ENSG00000107798	protein coding	de-novo	1	0	0.255444	0	0.422	0.372038	1.2	0.558333	1.259	0.648133
ENSG00000107854	protein coding	pre-existing	1	1	-0.442272	0	0.265	0.222642	3.501	0.558126	2.476	0.662763
ENSG00000107862	protein coding	basal-specific	0	0	0.0103547	0	0.52	0.413462	5.679	0.466808	5.492	0.457028
ENSG00000107897	protein coding	basal-specific	0	0	0.739968	0	0.571	0.420315	1.605	0.546417	3.595	0.620028
ENSG00000107929	protein coding	pre-existing	0	1	0.271012	1	0.317	0.26183	5.208	0.512865	4.966	0.54853
ENSG00000107937	protein coding	de-novo	1	1	-0.160888	0	0.336	0.425595	1.905	0.542257	2.705	0.561922
ENSG00000107959	protein coding	basal-specific	0	0	0.0208491	0	0.483	0.436853	3.117	0.491177	4.259	0.50317
ENSG00000108021	protein coding	de-novo	1	1	-2.21294	17	0.744	0.442204	8.076	0.574294	4.175	0.610539
ENSG00000108039	protein coding	basal-specific	0	0	0.564446	0	0.267	0.393258	2.001	0.488756	0.418	0.600478
ENSG00000108055	protein coding	pre-existing	0	1	-0.523231	0	0.122	0.278689	3.654	0.610016	1.746	0.687285
ENSG00000108064	protein coding	de-novo	1	0	-0.227044	0	0.138	0.391304	0.741	0.59919	4.146	0.655813
ENSG00000108091	protein coding	de-novo	1	0	0.704658	2	0.132	0.234848	1.425	0.480702	4.17	0.623261
ENSG00000108094	protein coding	de-novo	1	0	1.20136	0	0.49	0.316327	2.295	0.617429	2.608	0.652224
ENSG00000108239	protein coding	de-novo	0	1	-1.0821	2	0.073	0.328767	2.328	0.457904	3.236	0.655439
ENSG00000108256	protein coding	de-novo	1	0	-0.854917	8	0.089	0.404494	2.088	0.550766	8.7	0.646437
ENSG00000108312	protein coding	pre-existing	0	1	-0.804385	2	0.493	0.312373	2.295	0.454031	2.209	0.476686
ENSG00000108344	protein coding	basal-specific	0	0	0.31482	0	0.164	0.268293	1.605	0.431153	1.202	0.460899
ENSG00000108389	protein coding	de-novo	1	1	-1.49733	6	0.231	0.207792	3.63	0.466942	2.134	0.595127
ENSG00000108406	protein coding	pre-existing	1	0	-0.535865	1	0.114	0.377193	2.34	0.580342	1.173	0.647059
ENSG00000108424	protein coding	pre-existing	0	1	-0.087663	0	0.738	0.413279	2.631	0.530977	3.101	0.593679
ENSG00000108443	protein coding	de-novo	1	0	-0.676814	4	0.435	0.491954	1.578	0.544994	3.786	0.669572
ENSG00000108468	protein coding	de-novo	0	1	0.532676	0	0.481	0.349272	0.558	0.521505	1.383	0.585683
ENSG00000108479	protein coding	basal-specific	0	0	0.993367	0	0.1	0.21	1.179	0.346904	0.761	0.370565
ENSG00000108510	protein coding	de-novo	1	0	-2.32806	6	0.073	0.287671	6.525	0.576092	3.863	0.6803
ENSG00000108582	protein coding	de-novo	1	1	0.0609448	1	0.402	0.599502	4.143	0.528602	5.175	0.651014
ENSG00000108588	protein coding	de-novo	1	1	-0.307711	0	0.495	0.539394	1.452	0.566804	1.626	0.649446
ENSG00000108592	protein coding	basal-specific	0	0	-0.438158	2	0.638	0.412226	2.544	0.473664	0.397	0.455919
ENSG00000108599	protein coding	de-novo	0	1	-1.93524	2	0.149	0.322148	1.989	0.552036	1.925	0.61974
ENSG00000108651	protein coding	de-novo	1	1	-0.537512	0	0.081	0.395062	1.794	0.56243	2.455	0.584929
ENSG00000108654	protein coding	de-novo	1	0	-0.592316	0	0.951	0.391167	1.845	0.564228	3.124	0.613956
ENSG00000108821	protein coding	basal-specific	0	0	0.0917925	0	0.118	0.372881	4.395	0.349488	1.401	0.49536
ENSG00000108829	protein coding	de-novo	1	0	0.527035	1	0.206	0.281553	0.924	0.419913	1.75	0.545714
ENSG00000108861	protein coding	de-novo	1	1	1.03049	3	0.053	0.169811	0.558	0.413978	3.484	0.522101
ENSG00000108883	protein coding	pre-existing	0	1	-0.226955	1	0.398	0.449749	2.919	0.482014	1.326	0.4819
ENSG00000108946	protein coding	pre-existing	0	1	0.731562	0	0.579	0.609672	1.146	0.528796	4.101	0.647891
ENSG00000109046	protein coding	de-novo	1	0	-0.670807	0	0.32	0.36875	1.266	0.556872	3.557	0.610627
ENSG00000109111	protein coding	pre-existing	0	1	-0.446867	1	0.355	0.574648	5.181	0.473847	1.054	0.441176
ENSG00000109133	protein coding	de-novo	1	0	0.533257	0	0.356	0.348315	0.744	0.567204	6.604	0.65854
ENSG00000109184	protein coding	de-novo	1	0	-0.733335	0	0.243	0.300412	1.011	0.563798	4.362	0.648326
ENSG00000109189	protein coding	de-novo	1	0	-1.10882	1	0.28	0.503571	1.101	0.571299	6.68	0.606886
ENSG00000109320	protein coding	pre-existing	0	1	-1.28179	0	0.512	0.257812	2.934	0.511929	3.136	0.521365
ENSG00000109472	protein coding	de-novo	0	1	0.995884	0	0.214	0.275701	1.431	0.481481	0.937	0.700107
ENSG00000109606	protein coding	de-novo	1	0	-0.374005	0	0.161	0.397516	2.388	0.564908	0.449	0.679287
ENSG00000109685	protein coding	de-novo	0	1	-2.10229	8	0.518	0.411197	4.098	0.47511	7.624	0.550367
ENSG00000109805	protein coding	basal-specific	0	0	-0.679637	0	0.099	0.323232	3.048	0.606299	2.262	0.615827
ENSG00000109929	protein coding	de-novo	1	0	1.1233	0	0.237	0.35443	0.9	0.614444	5.898	0.636487
ENSG00000109971	protein coding	de-novo	1	0	0.574174	1	0.486	0.388889	1.941	0.535806	0.245	0.665306
ENSG00000110046	protein coding	basal-specific	0	0	-0.883527	2	0.084	0.25	5.817	0.362558	0.427	0.362998
ENSG00000110048	protein coding	basal-specific	0	0	-0.111653	4	0.11	0.245455	2.424	0.476898	2.179	0.575034
ENSG00000110075	protein coding	de-novo	0	1	-1.09262	0	0.513	0.504873	2.64	0.558333	2.217	0.609382
ENSG00000110090	protein coding	basal-specific	0	0	-0.189761	0	0.279	0.369176	2.322	0.46727	2.761	0.527707
ENSG00000110107	protein coding	basal-specific	0	0	0.869993	0	0.502	0.418327	1.515	0.451485	0.619	0.463651
ENSG00000110218	protein coding	de-novo	0	1	-0.331621	4	0.472	0.254237	1.281	0.512881	1.099	0.603276
ENSG00000110344	protein coding	basal-specific	0	0	-0.914444	0	0.465	0.649462	3.222	0.545003	2.771	0.642728
ENSG00000110367	protein coding	de-novo	1	0	-0.258644	3	0.361	0.578947	1.452	0.564738	4.342	0.614003
ENSG00000110422	protein coding	de-novo	1	0	-2.02743	4	0.511	0.27593	3.648	0.563596	3.455	0.689146
ENSG00000110435	protein coding	pre-existing	0	1	-0.13978	0	0.377	0.291777	1.506	0.522576	0.956	0.709205
ENSG00000110497	protein coding	basal-specific	0	0	-0.91889	6	0.45	0.442222	3.897	0.426482	1.036	0.451737
ENSG00000110514	protein coding	basal-specific	0	0	-1.03385	0	0.357	0.394958	4.944	0.469862	1.009	0.428147
ENSG00000110619	protein coding	basal-specific	0	0	-0.511938	2	0.246	0.313008	2.496	0.467147	2.348	0.489779
ENSG00000110696	protein coding	de-novo	1	0	-0.180302	0	0.135	0.362963	0.552	0.565217	3.236	0.640606
ENSG00000110768	protein coding	de-novo	1	0	-1.39465	1	0.668	0.428144	1.647	0.590164	1.176	0.653912
ENSG00000110841	protein coding	basal-specific	0	0	-0.193119	0	0.554	0.575812	3.036	0.549736	2.682	0.608501
ENSG00000110880	protein coding	pre-existing	1	1	1.33161	1	0.412	0.473301	1.584	0.508207	2.294	0.57367
ENSG00000110931	protein coding	de-novo	1	0	-0.610825	1	0.829	0.468034	1.767	0.400113	3.1	0.502258
ENSG00000110955	protein coding	basal-specific	0	0	0.61643	0	0.021	0.333333	1.59	0.487421	0.148	0.587838
ENSG00000111275	protein coding	basal-specific	0	0	1.70398	0	0.096	0.260417	1.554	0.412484	7.957	0.547065
ENSG00000111530	protein coding	de-novo	1	0	-0.159786	3	0.364	0.32967	3.693	0.600867	7.123	0.62586
ENSG00000111581	protein coding	basal-specific	0	0	-0.225015	0	0.568	0.512324	2.778	0.583153	3.347	0.620556
ENSG00000111602	protein coding	pre-existing	0	1	-0.417516	2	0.178	0.337079	3.627	0.466501	1.353	0.539542
ENSG00000111605	protein coding	de-novo	1	0	-0.426829	1	0.078	0.230769	1.767	0.504244	6.98	0.631375
ENSG00000111642	protein coding	pre-existing	0	1	-0.650786	0	0.62	0.262903	5.823	0.487378	1.991	0.50226
ENSG00000111667	protein coding	basal-specific	0	0	0.189945	1	0.032	0.3125	2.577	0.430345	0.555	0.4
ENSG00000111711	protein coding	de-novo	1	0	0.287751	1	0.231	0.471861	0.417	0.633094	2.701	0.689004
ENSG00000111790	protein coding	de-novo	1	0	-0.868117	0	0.402	0.455224	0.762	0.58399	1.917	0.709442
ENSG00000111961	protein coding	basal-specific	0	0	0.0133214	6	0.392	0.510204	3.744	0.444712	3.486	0.614171
ENSG00000112029	protein coding	de-novo	1	0	-1.03445	3	0.381	0.406824	1.344	0.578869	0.634	0.739748
ENSG00000112062	protein coding	de-novo	0	1	0.417605	0	0.481	0.286902	1.083	0.534626	2.789	0.580495
ENSG00000112078	protein coding	de-novo	1	0	-1.03119	5	0.552	0.387681	1.26	0.546032	3.968	0.568548
ENSG00000112081	protein coding	de-novo	1	0	-0.380809	0	0.166	0.415663	0.495	0.49899	3.611	0.626696
ENSG00000112118	protein coding	pre-existing	0	1	0.000804402	2	0.232	0.439655	2.562	0.467994	0.574	0.545296
ENSG00000112159	protein coding	pre-existing	0	1	-2.109	1	0.187	0.299465	16.791	0.517896	1.507	0.572661
ENSG00000112210	protein coding	de-novo	1	0	-0.374502	0	0.647	0.332303	0.714	0.605042	3.469	0.676564
ENSG00000112245	protein coding	de-novo	1	0	-2.09477	2	0.986	0.578093	0.522	0.591954	3.414	0.673404
ENSG00000112282	protein coding	pre-existing	1	0	-1.20479	0	0.193	0.362694	4.125	0.569939	0.947	0.702218
ENSG00000112339	protein coding	de-novo	1	1	-1.31367	0	0.405	0.520988	2.055	0.577129	4.901	0.647419
ENSG00000112367	protein coding	basal-specific	0	0	0.216845	0	0.471	0.592357	2.742	0.567104	8.841	0.610678
ENSG00000112531	protein coding	de-novo	1	0	0.350955	0	1.194	0.204355	1.026	0.520468	7.882	0.654529
ENSG00000112640	protein coding	basal-specific	0	0	0.0859854	0	0.125	0.2	1.809	0.462134	2.544	0.46423
ENSG00000112685	protein coding	basal-specific	0	0	-0.473842	0	0.298	0.456376	2.775	0.54991	1.517	0.583388
ENSG00000112697	protein coding	de-novo	1	0	0.860418	2	0.557	0.578097	1.086	0.581952	3.997	0.656242
ENSG00000112972	protein coding	de-novo	1	0	1.12342	2	0.213	0.361502	1.563	0.575176	3.661	0.631795
ENSG00000112983	protein coding	pre-existing	0	1	-0.923274	3	0.339	0.507375	3.708	0.5089	2.713	0.51714
ENSG00000112992	protein coding	basal-specific	0	0	-1.89026	0	0.889	0.55793	3.261	0.525912	4.446	0.576473
ENSG00000113013	protein coding	de-novo	1	1	0.193036	0	0.365	0.561644	2.04	0.536765	4.572	0.586833
ENSG00000113141	protein coding	pre-existing	0	1	0.1495	0	0.248	0.467742	1.674	0.511947	0.238	0.508403
ENSG00000113161	protein coding	de-novo	1	0	-0.288658	0	0.451	0.379157	2.667	0.56093	6.875	0.588509
ENSG00000113194	protein coding	de-novo	0	1	0.28585	6	0.539	0.400742	1.338	0.510463	3.124	0.555378
ENSG00000113360	protein coding	basal-specific	0	0	-1.00485	0	0.369	0.506775	4.125	0.520727	0.938	0.642857
ENSG00000113368	protein coding	pre-existing	0	1	0.353659	0	0.886	0.31377	1.761	0.492902	1.599	0.606004
ENSG00000113407	protein coding	basal-specific	0	0	-0.236296	0	0.604	0.531457	2.271	0.561867	2.187	0.585734
ENSG00000113460	protein coding	de-novo	1	0	0.0852309	0	0.028	0.25	1.062	0.59322	0.501	0.690619
ENSG00000113569	protein coding	pre-existing	1	0	0.0148917	0	0.14	0.507143	4.176	0.576389	3.763	0.596067
ENSG00000113583	protein coding	de-novo	1	0	1.34612	1	0.041	0.365854	0.798	0.531328	1.349	0.687917
ENSG00000113615	protein coding	de-novo	1	0	0.672493	0	0.292	0.349315	3.282	0.55454	2.815	0.70444
ENSG00000113645	protein coding	de-novo	0	1	-1.90056	0	0.508	0.208661	3.36	0.426786	3.286	0.523737
ENSG00000113658	protein coding	de-novo	1	0	0.215197	2	1.29	0.429457	1.398	0.555079	5.254	0.659498
ENSG00000113758	protein coding	basal-specific	0	0	0.464249	0	0.61	0.267213	2.088	0.376437	0.825	0.447273
ENSG00000113790	protein coding	basal-specific	0	0	0.454032	1	0.437	0.459954	2.172	0.524401	1.602	0.663546
ENSG00000114019	protein coding	basal-specific	0	0	0.90172	0	0.436	0.417431	2.514	0.361973	2.358	0.522901
ENSG00000114030	protein coding	de-novo	1	0	-0.289441	1	0.188	0.292553	1.617	0.553494	5.083	0.628172
ENSG00000114054	protein coding	basal-specific	0	0	0.554409	0	0.293	0.47099	1.713	0.47519	4.419	0.568454
ENSG00000114062	protein coding	de-novo	1	0	-1.31054	0	1.163	0.436801	2.628	0.607686	6.353	0.642059
ENSG00000114331	protein coding	de-novo	1	0	-0.464015	0	0.178	0.235955	2.427	0.579728	4.583	0.667685
ENSG00000114346	protein coding	de-novo	1	0	-0.72746	0	0.518	0.474903	2.745	0.615301	1.371	0.689278
ENSG00000114503	protein coding	de-novo	1	0	0.989583	2	0.502	0.571713	0.471	0.509554	1.964	0.601833
ENSG00000114520	protein coding	de-novo	1	0	-0.308171	0	0.03	0.266667	1.353	0.558019	1.149	0.590949
ENSG00000114686	protein coding	de-novo	1	0	-0.020923	0	0.447	0.498881	1.128	0.558511	0.511	0.682975
ENSG00000114744	protein coding	de-novo	1	0	-0.251862	0	0.045	0.355556	0.6	0.538333	3.049	0.645786
ENSG00000114850	protein coding	de-novo	1	0	-0.339634	0	0.156	0.608974	0.597	0.559464	3.65	0.61863
ENSG00000114867	protein coding	pre-existing	0	1	-0.406154	4	0.496	0.3125	4.821	0.437876	4.684	0.444278
ENSG00000114999	protein coding	de-novo	1	0	-1.04731	3	0.189	0.121693	1.134	0.508818	12.944	0.587685
ENSG00000115053	protein coding	pre-existing	0	1	-0.0406769	1	0.51	0.343137	2.205	0.534694	1.66	0.546386
ENSG00000115091	protein coding	de-novo	1	0	0.115894	0	0.314	0.356688	1.257	0.579952	5.141	0.678078
ENSG00000115159	protein coding	de-novo	1	0	-0.218768	0	0.545	0.563303	2.184	0.550366	3.485	0.654519
ENSG00000115183	protein coding	pre-existing	0	1	-0.859205	3	0.268	0.380597	5.586	0.471536	1.647	0.681239
ENSG00000115232	protein coding	de-novo	1	0	-0.0156307	0	0.448	0.28125	3.099	0.575024	3.413	0.664811
ENSG00000115241	protein coding	pre-existing	0	1	-0.445341	3	0.169	0.218935	1.641	0.468617	0.4	0.46
ENSG00000115306	protein coding	pre-existing	0	1	-2.37858	5	0.385	0.405195	7.101	0.464442	2.877	0.597497
ENSG00000115524	protein coding	pre-existing	1	1	-0.753436	0	0.08	0.425	3.915	0.569604	8.77	0.605701
ENSG00000115677	protein coding	basal-specific	0	0	-0.822011	2	0.514	0.449416	3.807	0.477016	2.337	0.44202
ENSG00000115761	protein coding	de-novo	1	0	-1.4076	1	0.126	0.309524	2.118	0.583569	6.962	0.571388
ENSG00000115762	protein coding	de-novo	1	1	0.635611	0	0.795	0.508176	0.93	0.421505	3.101	0.55853
ENSG00000115816	protein coding	de-novo	1	0	-1.66967	5	0.088	0.306818	3.165	0.606003	0.152	0.743421
ENSG00000115839	protein coding	pre-existing	0	1	-1.06101	2			3.075	0.554797	4.945	0.566026
ENSG00000115875	protein coding	de-novo	1	0	-0.128463	0	0.539	0.430427	0.717	0.51325	2.284	0.613835
ENSG00000115963	protein coding	de-novo	1	0	0.181305	2	0.25	0.58	0.735	0.536054	1.792	0.648996
ENSG00000116001	protein coding	de-novo	1	0	-0.6712	0	0.567	0.587302	1.161	0.564169	3.275	0.674504
ENSG00000116062	protein coding	de-novo	1	1	-1.15871	0	0.68	0.479412	4.089	0.550501	3.523	0.575362
ENSG00000116199	protein coding	de-novo	1	0	-2.17217	4	0.338	0.313609	1.23	0.493496	4.423	0.598236
ENSG00000116406	protein coding	de-novo	1	0	-2.20088	2	0.389	0.300771	2.874	0.576896	3.826	0.66597
ENSG00000116478	protein coding	basal-specific	0	0	0.248067	0	0.087	0.229885	1.449	0.499655	0.582	0.560137
ENSG00000116514	protein coding	de-novo	0	1	-0.493774	3	0.124	0.185484	2.199	0.416553	0.834	0.535971
ENSG00000116560	protein coding	de-novo	1	0	-0.243737	0	0.334	0.467066	2.187	0.427069	1.52	0.634868
ENSG00000116580	protein coding	basal-specific	0	0	-1.78132	7	0.163	0.411043	6.726	0.496729	0.925	0.507027
ENSG00000116584	protein coding	basal-specific	0	0	0.981141	0	0.32	0.378125	3.39	0.40826	3.643	0.426846
ENSG00000116641	protein coding	basal-specific	0	0	-1.30261	0	0.122	0.172131	6.423	0.582749	6.394	0.593056
ENSG00000116675	protein coding	basal-specific	0	0	0.812955	0	0.369	0.520325	2.913	0.498112	2.846	0.649332
ENSG00000116679	protein coding	basal-specific	0	0	-2.364	0	0.537	0.487896	1.929	0.578538	1.647	0.655738
ENSG00000116729	protein coding	de-novo	0	1	0.844137	1	0.388	0.476804	1.632	0.521446	0.866	0.590069
ENSG00000116747	protein coding	de-novo	1	0	-0.452804	1	0.568	0.482394	1.617	0.606061	6.488	0.680949
ENSG00000116830	protein coding	basal-specific	0	0	-1.26414	4	0.021	0.380952	3.489	0.519347	5.929	0.582729
ENSG00000116871	protein coding	basal-specific	0	0	0.600367	0	0.453	0.192053	2.526	0.335313	0.591	0.456853
ENSG00000116903	protein coding	de-novo	1	0	-1.23284	11	0.107	0.35514	2.178	0.456841	2.815	0.661101
ENSG00000116906	protein coding	de-novo	1	0	-1.99861	1	0.172	0.30814	2.043	0.577093	2.12	0.587264
ENSG00000116918	protein coding	de-novo	1	0	-0.436595	0	0.27	0.32963	0.873	0.60252	1.619	0.679432
ENSG00000116922	protein coding	de-novo	1	0	-0.0958392	1	0.531	0.427495	0.612	0.454248	1.81	0.61105
ENSG00000116984	protein coding	pre-existing	0	1	-2.20034	0	0.545	0.368807	3.798	0.528436	6.337	0.577087
ENSG00000117000	protein coding	de-novo	1	0	-1.6742	5	0.013	0.230769	5.745	0.60087	0.474	0.628692
ENSG00000117036	protein coding	pre-existing	1	1	0.579573	4	0.172	0.313953	1.539	0.452242	3.65	0.590685
ENSG00000117139	protein coding	pre-existing	1	1	-0.407458	2	0.642	0.431464	4.743	0.519502	4.763	0.585975
ENSG00000117143	protein coding	de-novo	1	0	-0.332314	1	0.113	0.469027	1.569	0.566603	1.877	0.664358
ENSG00000117153	protein coding	de-novo	0	1	-1.42132	0	0.191	0.319372	1.707	0.514353	1.521	0.589086
ENSG00000117335	protein coding	de-novo	1	0	-0.80878	0	0.176	0.363636	1.2	0.568333	2.158	0.652456
ENSG00000117519	protein coding	de-novo	1	0	0.669994	0	0.329	0.24924	0.99	0.547475	0.793	0.680958
ENSG00000117528	protein coding	de-novo	1	0	-0.325226	0	0.09	0.211111	1.98	0.582323	1.534	0.681877
ENSG00000117593	protein coding	de-novo	1	0	0.868498	2	0.577	0.466205	1.938	0.54644	2.572	0.582426
ENSG00000117713	protein coding	basal-specific	0	0	0.462552	8	0.751	0.617843	6.858	0.401721	2.265	0.475938
ENSG00000117724	protein coding	basal-specific	0	0	-2.19238	19	0.168	0.452381	9.345	0.589834	0.777	0.643501
ENSG00000117899	protein coding	de-novo	1	0	-0.949031	3	0.037	0.297297	0.705	0.483688	3.467	0.540813
ENSG00000117906	protein coding	de-novo	1	1	-0.512984	0	0.104	0.192308	1.008	0.556548	5.171	0.612841
ENSG00000118193	protein coding	basal-specific	0	0	-2.01972	2	0.456	0.41886	4.947	0.618557	1.891	0.661555
ENSG00000118200	protein coding	de-novo	1	0	-2.83957	5	0.935	0.291979	4.47	0.589038	2.645	0.694896
ENSG00000118246	protein coding	de-novo	1	0	-0.534392	1	0.348	0.520115	2.133	0.606188	4.387	0.593572
ENSG00000118454	protein coding	de-novo	1	0	-2.28021	0	0.326	0.322086	1.626	0.53936	3.718	0.671867
ENSG00000118620	protein coding	de-novo	1	0	-1.03055	1	0.167	0.389222	1.713	0.619965	2.61	0.645211
ENSG00000118655	protein coding	de-novo	1	0	-0.460059	4	0.374	0.358289	1.599	0.481551	2.802	0.555318
ENSG00000118689	protein coding	de-novo	0	1	-0.134971	2	0.304	0.210526	2.022	0.390702	4.982	0.576676
ENSG00000118855	protein coding	de-novo	0	1	-1.83289	0	0.529	0.499055	1.545	0.525566	1.906	0.602833
ENSG00000118873	protein coding	basal-specific	0	0	-1.25357	0	0.299	0.454849	4.257	0.560489	2.958	0.669033
ENSG00000118965	protein coding	pre-existing	1	0	-0.699311	0	0.09	0.355556	3.546	0.580936	3.295	0.643703
ENSG00000119041	protein coding	basal-specific	0	0	-0.596626	0	0.114	0.385965	2.661	0.576851	1.827	0.6185
ENSG00000119138	protein coding	de-novo	0	1	1.3797	7	1.294	0.393354	0.735	0.394558	3.172	0.629571
ENSG00000119139	protein coding	pre-existing	0	1	0.255202	3	1.081	0.622572	3.75	0.4664	2.283	0.542707
ENSG00000119203	protein coding	de-novo	1	0	-0.612993	0	1.138	0.525483	2.055	0.580535	0.084	0.654762
ENSG00000119231	protein coding	de-novo	1	0	-1.35509	8	0.249	0.289157	2.268	0.563933	3.791	0.570562
ENSG00000119280	protein coding	de-novo	0	1	0.319654	1	0.601	0.332779	0.984	0.360772	2.733	0.541164
ENSG00000119383	protein coding	basal-specific	0	0	#N/A	0	0.298	0.486577	1.122	0.446524	1.482	0.379217
ENSG00000119392	protein coding	basal-specific	0	0	-0.818974	0	0.151	0.311258	2.124	0.47081	3.477	0.541846
ENSG00000119396	protein coding	de-novo	1	1	0.854224	0	0.238	0.298319	0.648	0.572531	3.263	0.641434
ENSG00000119401	protein coding	basal-specific	0	0	-0.256775	9	0.181	0.486188	1.962	0.454638	1.596	0.60589
ENSG00000119414	protein coding	de-novo	1	0	0.337415	0	0.221	0.298643	1.029	0.554908	3.1	0.660645
ENSG00000119446	protein coding	de-novo	1	0	0.154802	0	0.142	0.359155	0.573	0.542757	4.262	0.631394
ENSG00000119541	protein coding	de-novo	1	0	0.294399	0	0.217	0.364055	1.335	0.568539	1.785	0.664426
ENSG00000119596	protein coding	basal-specific	0	0	-1.12636	9	0.174	0.275862	6.441	0.494178	4.093	0.547276
ENSG00000119638	protein coding	pre-existing	0	1	-1.21651	2	0.486	0.343621	2.976	0.492944	5.211	0.558818
ENSG00000119689	protein coding	basal-specific	0	0	0.846408	0	0.063	0.301587	1.362	0.477974	1.413	0.491154
ENSG00000119787	protein coding	de-novo	1	0	-0.972442	1	0.415	0.457831	1.752	0.580479	2.04	0.637745
ENSG00000119906	protein coding	de-novo	1	0	#N/A	2	0.148	0.331081	3.561	0.588318	4.732	0.625106
ENSG00000119927	protein coding	de-novo	1	1	-1.35289	1	0.2	0.47	2.487	0.550462	3.685	0.622252
ENSG00000119969	protein coding	de-novo	1	0	-0.687281	0	0.596	0.431208	2.655	0.617702	4.054	0.628515
ENSG00000120008	protein coding	pre-existing	1	0	-0.529328	1	0.845	0.540828	3.675	0.548027	3.755	0.57976
ENSG00000120053	protein coding	basal-specific	0	0	0.775378	0	0.059	0.440678	1.242	0.477456	0.677	0.577548
ENSG00000120063	protein coding	de-novo	1	0	-0.538669	2	0.184	0.516304	1.134	0.516755	4.968	0.653382
ENSG00000120137	protein coding	de-novo	1	0	-1.79642	1	0.186	0.446237	1.113	0.581312	9.076	0.642023
ENSG00000120253	protein coding	de-novo	1	0	0.404911	1	0.065	0.369231	1.143	0.557305	2.654	0.598719
ENSG00000120254	protein coding	basal-specific	0	0	-1.05487	0	0.233	0.407725	2.94	0.484354	0.574	0.508711
ENSG00000120265	protein coding	de-novo	1	0	0.532277	0	0.459	0.276688	0.753	0.482072	0.842	0.65677
ENSG00000120686	protein coding	de-novo	1	0	1.77349	0	0.187	0.406417	0.312	0.554487	2.841	0.659627
ENSG00000120696	protein coding	basal-specific	0	0	0.85923	7	0.312	0.339744	2.055	0.482725	2.369	0.692275
ENSG00000120705	protein coding	de-novo	1	0	-0.103483	2	0.449	0.314031	1.314	0.589041	2.21	0.593213
ENSG00000120733	protein coding	pre-existing	0	1	-0.892222	7	0.117	0.495726	5.286	0.481271	5.499	0.512821
ENSG00000120742	protein coding	de-novo	1	0	-0.180208	0	1.273	0.406127	0.237	0.459916	2.46	0.661382
ENSG00000120800	protein coding	de-novo	1	0	-1.67734	0	0.178	0.365169	8.358	0.581838	0.495	0.565657
ENSG00000120802	protein coding	de-novo	1	0	0.619523	0	0.278	0.320144	2.085	0.541487	2.493	0.651424
ENSG00000120805	protein coding	de-novo	1	0	0.717907	0	0.539	0.486085	0.585	0.577778	2.524	0.64065
ENSG00000121005	protein coding	de-novo	1	1	-0.331286	0	0.562	0.576512	1.503	0.560878	2.316	0.694732
ENSG00000121039	protein coding	de-novo	1	1	-2.02323	0	0.688	0.223837	1.026	0.469786	2.245	0.63118
ENSG00000121057	protein coding	pre-existing	1	1	-1.91219	7	0.555	0.345946	2.712	0.438053	2.055	0.52944
ENSG00000121060	protein coding	pre-existing	0	1	1.61085	2	0.092	0.326087	1.893	0.421553	3.791	0.525983
ENSG00000121152	protein coding	pre-existing	1	1	-0.337671	1	0.295	0.528814	2.226	0.51168	3.74	0.557219
ENSG00000121274	protein coding	de-novo	1	0	-0.559796	1	0.316	0.164557	2.142	0.492997	6.323	0.651906
ENSG00000121390	protein coding	de-novo	0	1	-0.691217	0	0.188	0.510638	1.572	0.482188	0.675	0.702222
ENSG00000121481	protein coding	de-novo	1	0	-0.636457	0	0.202	0.405941	1.011	0.582591	2.302	0.679844
ENSG00000121486	protein coding	basal-specific	0	0	-0.426265	0	0.241	0.394191	2.202	0.569936	1.918	0.694473
ENSG00000121579	protein coding	de-novo	1	0	0.0596486	0	0.373	0.592493	0.51	0.586275	5.302	0.632591
ENSG00000121644	protein coding	de-novo	1	0	-0.967966	2	0.211	0.208531	0.585	0.555556	3.244	0.625154
ENSG00000121774	protein coding	pre-existing	0	1	0.70102	0	0.128	0.28125	1.332	0.430931	1.253	0.660016
ENSG00000121864	protein coding	de-novo	1	0	-1.32697	4	0.579	0.385147	1.458	0.624829	4.161	0.600817
ENSG00000121892	protein coding	de-novo	1	0	-0.655722	1	0.54	0.225926	4.014	0.589686	2.622	0.657895
ENSG00000122042	protein coding	de-novo	1	0	0.226169	4	1.079	0.365153	0.354	0.587571	2.884	0.684813
ENSG00000122126	protein coding	basal-specific	0	0	-0.271981	0	0.181	0.270718	2.706	0.542868	4.881	0.556648
ENSG00000122218	protein coding	pre-existing	1	0	-0.072101	0	0.103	0.349515	3.702	0.509184	4.835	0.530507
ENSG00000122299	protein coding	de-novo	1	0	-2.14562	0	1.404	0.618234	2.916	0.593278	1.254	0.61882
ENSG00000122378	protein coding	de-novo	1	0	-0.807818	1	0.626	0.399361	0.69	0.502899	5.016	0.555223
ENSG00000122482	protein coding	de-novo	1	0	-2.11992	2	0.322	0.338509	3.984	0.61998	1.5	0.706
ENSG00000122565	protein coding	de-novo	1	0	-0.309552	0	0.881	0.331442	0.552	0.615942	1.399	0.677627
ENSG00000122642	protein coding	de-novo	0	1	-0.284583	1	0.17	0.211765	1.872	0.471688	1.579	0.529449
ENSG00000122692	protein coding	basal-specific	0	0	0.0619423	0	0.066	0.348485	1.542	0.550584	5.528	0.571454
ENSG00000122729	protein coding	basal-specific	0	0	-0.219668	0	0.227	0.321586	2.67	0.525468	4.658	0.560756
ENSG00000122779	protein coding	basal-specific	0	0	0.162042	2	0.29	0.268966	3.153	0.532826	5.045	0.620416
ENSG00000122786	protein coding	basal-specific	0	0	1.04956	1	0.459	0.496732	2.382	0.513854	2.399	0.657357
ENSG00000122882	protein coding	basal-specific	0	0	0.976396	0	0.247	0.396761	2.034	0.551131	1.087	0.571297
ENSG00000122958	protein coding	de-novo	1	0	1.11766	0	0.653	0.336907	0.984	0.638211	3.143	0.611199
ENSG00000122965	protein coding	basal-specific	0	0	-1.14204	1	0.098	0.377551	2.883	0.442595	1.46	0.469178
ENSG00000122966	protein coding	basal-specific	0	0	-0.547531	0	0.609	0.377668	6.21	0.47649	7.859	0.48225
ENSG00000123064	protein coding	pre-existing	0	1	-0.264897	1	0.155	0.496774	2.649	0.364288	1.704	0.443075
ENSG00000123091	protein coding	de-novo	1	0	-0.893085	1	0.484	0.235537	0.465	0.494624	2.125	0.680941
ENSG00000123124	protein coding	de-novo	1	0	-2.17215	0	0.498	0.287149	2.769	0.595522	1.61	0.691925
ENSG00000123200	protein coding	basal-specific	0	0	-0.547656	7	0.352	0.380682	5.01	0.548503	2.662	0.676935
ENSG00000123240	protein coding	basal-specific	0	0	1.61068	0	0.673	0.468053	1.734	0.527682	1.442	0.615118
ENSG00000123268	protein coding	de-novo	1	0	0.225917	2	0.236	0.372881	0.816	0.557598	1.383	0.724512
ENSG00000123416	protein coding	basal-specific	0	0	0.710495	0	0.426	0.403756	1.356	0.460914	1.63	0.469939
ENSG00000123485	protein coding	basal-specific	0	0	0.307249	4	0.066	0.348485	2.247	0.498887	0.876	0.558219
ENSG00000123505	protein coding	de-novo	1	0	-2.11818	0	0.441	0.537415	1.389	0.588193	4.879	0.617545
ENSG00000123562	protein coding	de-novo	1	0	-1.29413	2	0.437	0.567506	0.867	0.536332	0.665	0.661654
ENSG00000123607	protein coding	basal-specific	0	0	-1.07396	0	0.146	0.260274	3.972	0.60851	11.481	0.622942
ENSG00000123684	protein coding	de-novo	1	0	-2.00699	0	0.816	0.457108	1.113	0.58221	6.442	0.631481
ENSG00000124006	protein coding	basal-specific	0	0	0.395664	2	0.307	0.208469	5.691	0.335266	0.831	0.534296
ENSG00000124151	protein coding	basal-specific	0	0	-0.51426	0	0.231	0.441558	4.275	0.532398	3.46	0.632659
ENSG00000124177	protein coding	basal-specific	0	0	-2.18073	11	0.088	0.636364	8.148	0.498773	2.51	0.624303
ENSG00000124181	protein coding	basal-specific	0	0	-0.484517	2	0.405	0.195062	3.876	0.431889	3.117	0.499519
ENSG00000124193	protein coding	de-novo	1	0	0.219563	0	0.141	0.283688	1.035	0.485024	3.18	0.653145
ENSG00000124198	protein coding	pre-existing	0	1	-1.60722	0	0.179	0.189944	5.358	0.520157	8.508	0.569229
ENSG00000124207	protein coding	de-novo	1	0	0.23457	0	0.189	0.333333	2.916	0.611454	0.522	0.649425
ENSG00000124228	protein coding	basal-specific	0	0	-0.330699	0	0.033	0.393939	2.298	0.468668	0.297	0.511785
ENSG00000124422	protein coding	pre-existing	0	1	-0.957006	2	0.233	0.446352	1.578	0.439163	3.435	0.495197
ENSG00000124459	protein coding	de-novo	1	0	-0.989695	5	1.114	0.475763	2.049	0.531967	0.763	0.63827
ENSG00000124486	protein coding	basal-specific	0	0	-1.5713	0	0.823	0.351154	7.713	0.587709	4.055	0.64143
ENSG00000124535	protein coding	de-novo	0	1	-0.644873	0	0.248	0.560484	1.998	0.384384	1.67	0.57006
ENSG00000124571	protein coding	basal-specific	0	0	-0.382533	0	0.174	0.270115	3.615	0.524481	1.534	0.513038
ENSG00000124766	protein coding	de-novo	0	1	2.31259	13	0.784	0.438776	1.425	0.295439	2.66	0.581579
ENSG00000124767	protein coding	de-novo	1	0	0.719144	0	0.091	0.384615	0.555	0.556757	1.37	0.640146
ENSG00000124831	protein coding	basal-specific	0	0	-0.0383099	6	0.311	0.180064	2.427	0.522456	2.51	0.570518
ENSG00000124942	protein coding	pre-existing	1	0	-0.957088	27	0.322	0.304348	17.673	0.506931	0.842	0.573634
ENSG00000125107	protein coding	pre-existing	1	1	-1.65405	0	0.46	0.484783	7.131	0.54831	1.098	0.52459
ENSG00000125124	protein coding	basal-specific	0	0	-0.395171	0	0.638	0.484326	2.211	0.536861	5.839	0.587429
ENSG00000125249	protein coding	de-novo	1	0	-1.13048	3	0.302	0.165563	0.552	0.447464	4.686	0.664959
ENSG00000125257	protein coding	de-novo	1	0	-1.18662	0	0.161	0.21118	3.978	0.555304	5.742	0.585336
ENSG00000125266	protein coding	de-novo	1	1	2.14548	5	0.698	0.204871	1.002	0.518962	3.295	0.556297
ENSG00000125304	protein coding	de-novo	1	0	-0.0430253	0	1.29	0.470543	1.992	0.573795	1.29	0.677519
ENSG00000125484	protein coding	de-novo	1	0	-0.5533	9	0.564	0.322695	2.469	0.491697	6.008	0.603862
ENSG00000125630	protein coding	de-novo	1	0	-1.52562	6	0.765	0.380392	3.522	0.528961	4.089	0.601859
ENSG00000125651	protein coding	basal-specific	0	0	0.358572	1	0.238	0.340336	1.554	0.39897	0.709	0.469676
ENSG00000125733	protein coding	pre-existing	0	1	-0.0970674	0	0.646	0.464396	1.806	0.419712	0.942	0.43949
ENSG00000125753	protein coding	basal-specific	0	0	-0.774233	0	0.519	0.258189	1.143	0.36308	1.147	0.480384
ENSG00000125817	protein coding	de-novo	0	1	-1.80141	9	0.257	0.0972763	1.8	0.350556	0.833	0.37455
ENSG00000125827	protein coding	de-novo	1	0	-1.13629	2	0.192	0.276042	1.05	0.475238	4.905	0.620183
ENSG00000126012	protein coding	basal-specific	0	0	-1.07735	1	0.533	0.390244	4.683	0.416186	1.423	0.559382
ENSG00000126016	protein coding	basal-specific	0	0	-5.31006	3	0.796	0.41206	3.255	0.45192	4.064	0.604085
ENSG00000126107	protein coding	basal-specific	0	0	0.530698	0	0.162	0.438272	2.586	0.401392	0.952	0.459034
ENSG00000126216	protein coding	de-novo	0	1	-0.626983	0	0.225	0.235556	2.724	0.51395	2.047	0.576942
ENSG00000126254	protein coding	basal-specific	0	0	2.56179	0	0.124	0.33871	1.443	0.344421	0.132	0.416667
ENSG00000126261	protein coding	de-novo	1	1	1.55926	0	0.498	0.495984	1.923	0.557462	2.03	0.575369
ENSG00000126461	protein coding	basal-specific	0	0	0.613076	6	0.197	0.370558	3.939	0.312262	0.243	0.399177
ENSG00000126524	protein coding	de-novo	1	0	0.101829	0	0.679	0.427099	0.753	0.564409	1.186	0.63575
ENSG00000126602	protein coding	basal-specific	0	0	-0.13417	1	0.73	0.463014	2.115	0.420804	0.659	0.449165
ENSG00000126787	protein coding	basal-specific	0	0	-0.560191	0	0.255	0.486275	2.541	0.619441	0.342	0.684211
ENSG00000126945	protein coding	pre-existing	0	1	-0.208987	3	0.151	0.509934	1.35	0.522963	0.795	0.677987
ENSG00000127022	protein coding	de-novo	1	0	-0.981777	0	0.805	0.43354	1.881	0.549708	5.045	0.616055
ENSG00000127334	protein coding	de-novo	1	0	-1.56656	7	0.426	0.262911	1.806	0.457918	6.693	0.650979
ENSG00000127481	protein coding	basal-specific	0	0	-0.996923	0	1.153	0.590633	15.552	0.482767	2.239	0.509156
ENSG00000127527	protein coding	basal-specific	0	0	1.15794	5	0.896	0.510045	2.733	0.450421	2.523	0.460959
ENSG00000127603	protein coding	pre-existing	0	1	-2.96795	9	1.092	0.558608	22.779	0.533913	5.539	0.58043
ENSG00000127616	protein coding	basal-specific	0	0	0.150215	0	0.437	0.327231	5.04	0.389286	3.038	0.419026
ENSG00000127663	protein coding	basal-specific	0	0	0.546395	0	0.226	0.300885	3.393	0.365753	2.087	0.435553
ENSG00000127804	protein coding	de-novo	1	0	-0.903181	5	0.131	0.412214	1.689	0.525163	3.921	0.527416
ENSG00000127870	protein coding	de-novo	1	0	-0.239297	5	0.413	0.372881	2.058	0.566569	1.062	0.722222
ENSG00000127946	protein coding	basal-specific	0	0	-0.452605	5	0.145	0.406897	3.114	0.45183	4.874	0.514362
ENSG00000127955	protein coding	de-novo	0	1	1.00637	0	0.958	0.502088	1.065	0.575587	8.688	0.650322
ENSG00000127995	protein coding	de-novo	1	0	-2.15256	0	0.276	0.206522	2.394	0.624478	1.261	0.689929
ENSG00000128245	protein coding	de-novo	1	0	-0.00440518	3	0.212	0.188679	0.741	0.481781	1.448	0.561464
ENSG00000128487	protein coding	basal-specific	0	0	-2.27291	8	0.598	0.473244	3.207	0.493296	4.961	0.513203
ENSG00000128590	protein coding	de-novo	1	0	0.463499	2	0.24	0.3125	0.672	0.611607	1.497	0.684035
ENSG00000128591	protein coding	basal-specific	0	0	-3.35435	0	0.232	0.237069	8.178	0.378332	0.751	0.411451
ENSG00000128595	protein coding	de-novo	1	1	0.324472	5	0.943	0.556734	0.972	0.553498	4.233	0.611387
ENSG00000128641	protein coding	pre-existing	1	0	-0.0729958	0	0.399	0.586466	3.411	0.564644	1.429	0.681596
ENSG00000128714	protein coding	de-novo	1	0	0.433076	0	0.17	0.247059	1.032	0.36531	1.214	0.611203
ENSG00000128731	protein coding	basal-specific	0	0	-1.9565	2	0.136	0.227941	14.505	0.462944	2.772	0.434343
ENSG00000128915	protein coding	de-novo	1	0	#N/A	1	0.454	0.447137	2.949	0.617837	6.588	0.628415
ENSG00000128989	protein coding	de-novo	1	0	0.622326	0	0.547	0.402194	0.396	0.517677	4.889	0.645531
ENSG00000129083	protein coding	de-novo	1	0	-0.435943	0	0.317	0.391167	2.862	0.598882	0.318	0.720126
ENSG00000129128	protein coding	de-novo	1	0	0.143503	0	0.111	0.252252	0.543	0.570902	3.915	0.663091
ENSG00000129245	protein coding	pre-existing	0	1	0.0365058	0	0.365	0.191781	2.022	0.437685	0.6	0.431667
ENSG00000129351	protein coding	pre-existing	0	1	-0.0116161	9	0.354	0.443503	2.697	0.415647	3.088	0.455635
ENSG00000129484	protein coding	basal-specific	0	0	-0.813269	0	0.027	0.481481	1.752	0.535959	0.379	0.612137
ENSG00000129625	protein coding	de-novo	1	0	1.55743	0	0.187	0.294118	0.57	0.492982	2.401	0.652228
ENSG00000129657	protein coding	basal-specific	0	0	-0.42689	0	0.595	0.470588	2.16	0.481944	3.078	0.495776
ENSG00000129680	protein coding	basal-specific	0	0	-0.950891	2	0.163	0.466258	2.631	0.5477	1.826	0.511501
ENSG00000129691	protein coding	basal-specific	0	0	0.540669	0	0.441	0.421769	1.887	0.504505	1.827	0.536946
ENSG00000130024	protein coding	de-novo	1	0	-1.0349	1	0.569	0.147627	1.497	0.544422	3.187	0.669281
ENSG00000130119	protein coding	basal-specific	0	0	0.0359504	2	0.709	0.519041	1.749	0.480846	6.687	0.565276
ENSG00000130177	protein coding	de-novo	1	0	0.0448238	1	0.48	0.379167	1.863	0.580247	0.433	0.581986
ENSG00000130227	protein coding	basal-specific	0	0	-0.981776	0	0.171	0.549708	3.267	0.521886	1.497	0.555778
ENSG00000130294	protein coding	basal-specific	0	0	1.45245	0	0.47	0.355319	5.4	0.388519	3.603	0.397169
ENSG00000130340	protein coding	pre-existing	0	1	-0.566347	0	0.363	0.460055	1.899	0.513428	3.396	0.536808
ENSG00000130396	protein coding	pre-existing	0	1	-1.35283	5	0.319	0.319749	5.673	0.49339	2.088	0.644636
ENSG00000130559	protein coding	de-novo	1	1	-1.42275	7	0.387	0.165375	4.842	0.435151	2.822	0.5691
ENSG00000130589	protein coding	basal-specific	0	0	-0.848934	5	0.892	0.311659	7.95	0.32805	1.16	0.415517
ENSG00000130640	protein coding	basal-specific	0	0	-0.874119	0	0.757	0.47424	2.793	0.422127	3.792	0.417458
ENSG00000130726	protein coding	basal-specific	0	0	0.0451677	0	0.694	0.266571	2.508	0.378389	0.169	0.420118
ENSG00000130749	protein coding	pre-existing	0	1	-0.461441	9	0.062	0.387097	3.912	0.353783	2.169	0.474412
ENSG00000130816	protein coding	pre-existing	0	1	-0.205329	0	0.506	0.537549	4.977	0.437412	4.91	0.44888
ENSG00000130826	protein coding	de-novo	1	1	-0.920843	0	1.73	0.593642	1.545	0.520388	2.316	0.548359
ENSG00000130830	protein coding	basal-specific	0	0	0.742387	0	0.393	0.356234	1.401	0.486795	1.776	0.509572
ENSG00000130935	protein coding	de-novo	1	0	-0.226995	0			2.16	0.600926	1.935	0.613437
ENSG00000130939	protein coding	basal-specific	0	0	-0.188123	0	0.839	0.387366	4.062	0.499754	1.283	0.590803
ENSG00000130985	protein coding	basal-specific	0	0	0.799149	0	1.004	0.497012	3.177	0.437205	0.199	0.452261
ENSG00000131013	protein coding	de-novo	0	1	-0.101544	0	0.534	0.664794	1.479	0.608519	0.958	0.696242
ENSG00000131016	protein coding	pre-existing	0	1	-1.05161	13	0.272	0.341912	5.349	0.488129	2.845	0.648506
ENSG00000131018	protein coding	pre-existing	1	1	-0.343639	2	1.004	0.464143	26.394	0.532659	4.917	0.570877
ENSG00000131023	protein coding	de-novo	1	0	-0.727823	5	0.397	0.410579	3.393	0.575892	3.576	0.663591
ENSG00000131236	protein coding	basal-specific	0	0	1.12456	0	0.561	0.331551	1.428	0.510504	1.116	0.5681
ENSG00000131242	protein coding	de-novo	0	1	-1.5818	1	0.243	0.222222	1.914	0.404911	6.479	0.476925
ENSG00000131269	protein coding	basal-specific	0	0	-0.531429	0	0.071	0.535211	2.274	0.557168	2.322	0.638674
ENSG00000131473	protein coding	pre-existing	1	1	-0.328509	0	0.212	0.433962	3.306	0.448881	0.893	0.610302
ENSG00000131504	protein coding	pre-existing	0	1	-0.922533	2	0.141	0.241135	3.819	0.504321	1.949	0.482299
ENSG00000131507	protein coding	de-novo	1	0	1.10416	0	0.196	0.239796	0.666	0.527027	2.712	0.664086
ENSG00000131558	protein coding	basal-specific	0	0	-0.274212	0	0.029	0.275862	2.925	0.520342	1.233	0.567721
ENSG00000131626	protein coding	pre-existing	0	1	-1.55651	0	0.266	0.601504	3.675	0.503129	5.953	0.52377
ENSG00000131711	protein coding	basal-specific	0	0	0.712622	10	0.372	0.510753	7.407	0.515863	4.326	0.628525
ENSG00000131725	protein coding	basal-specific	0	0	-0.837457	1	0.431	0.364269	2.742	0.588257	0.974	0.715606
ENSG00000131747	protein coding	pre-existing	1	0	-0.563595	0	0.137	0.40146	4.596	0.605744	0.994	0.658954
ENSG00000131778	protein coding	de-novo	1	0	-2.0005	0	0.346	0.317919	2.694	0.523756	2.819	0.548421
ENSG00000131873	protein coding	de-novo	1	0	-3.22781	8	0.592	0.194257	2.409	0.47198	2.011	0.546992
ENSG00000131899	protein coding	basal-specific	0	0	-1.68035	0	0.048	0.166667	3.195	0.373709	0.969	0.44582
ENSG00000132153	protein coding	basal-specific	0	0	-1.27594	4	0.42	0.511905	3.669	0.396566	3.557	0.409053
ENSG00000132305	protein coding	basal-specific	0	0	-0.13064	0	0.297	0.491582	2.277	0.524374	0.913	0.561884
ENSG00000132361	protein coding	basal-specific	0	0	0.431096	1	0.325	0.409231	4.047	0.368668	1.208	0.355132
ENSG00000132382	protein coding	basal-specific	0	0	0.563443	2	0.062	0.354839	3.999	0.389347	0.511	0.455969
ENSG00000132383	protein coding	pre-existing	1	1	0.691489	0	0.205	0.273171	1.851	0.515937	2.907	0.544548
ENSG00000132388	protein coding	de-novo	1	0	0.940323	1	0.64	0.375	0.513	0.57115	3.295	0.616085
ENSG00000132405	protein coding	de-novo	0	1	-2.29761	6	0.371	0.334232	2.082	0.487032	2.726	0.488261
ENSG00000132436	protein coding	de-novo	1	0	-1.6544	7	1.554	0.651223	2.025	0.577778	1.135	0.693392
ENSG00000132463	protein coding	de-novo	0	1	-0.0863207	0	0.262	0.450382	1.443	0.480942	5.104	0.606779
ENSG00000132466	protein coding	basal-specific	0	0	-1.33749	3	0.13	0.269231	7.812	0.529186	2.855	0.696673
ENSG00000132475	protein coding	de-novo	1	0	-0.0677417	0	0.144	0.375	0.454	0.396476	2.161	0.612217
ENSG00000132603	protein coding	de-novo	1	0	-0.669279	2	0.262	0.419847	0.543	0.508287	1.454	0.629298
ENSG00000132640	protein coding	de-novo	1	0	-0.722235	5	0.625	0.4896	1.569	0.520076	2.943	0.62827
ENSG00000132646	protein coding	de-novo	1	0	0.219834	0	0.243	0.353909	0.786	0.535623	0.33	0.718182
ENSG00000132792	protein coding	basal-specific	0	0	0.393128	1	0.35	0.411429	1.707	0.495606	0.116	0.482759
ENSG00000132849	protein coding	basal-specific	0	0	#N/A	0	0.337	0.543027	5.649	0.546645	3.144	0.568702
ENSG00000132952	protein coding	de-novo	1	0	-1.7047	8	0.368	0.55163	3.279	0.605367	1.414	0.529703
ENSG00000133026	protein coding	pre-existing	0	1	-0.955724	7	0.528	0.329545	6.024	0.50581	6.895	0.505584
ENSG00000133028	protein coding	de-novo	1	0	-0.313066	3	0.035	0.314286	0.906	0.480132	8.645	0.559977
ENSG00000133103	protein coding	basal-specific	0	0	0.418999	0	0.1	0.3	1.974	0.575481	3.309	0.664249
ENSG00000133104	protein coding	de-novo	1	0	0.257173	5	0.254	0.30315	2.001	0.56072	2.727	0.685369
ENSG00000133124	protein coding	basal-specific	0	0	-0.521187	12	0.219	0.3379	3.774	0.434817	12.622	0.639756
ENSG00000133131	protein coding	basal-specific	0	0	-6.75696	2	0.243	0.255144	2.814	0.536247	1.912	0.606695
ENSG00000133226	protein coding	basal-specific	0	0	0.838249	0	0.27	0.377778	2.742	0.495624	0.995	0.674372
ENSG00000133313	protein coding	basal-specific	0	0	0.887125	3	0.386	0.569948	1.428	0.444678	3.386	0.495275
ENSG00000133422	protein coding	basal-specific	0	0	0.686933	1	1.364	0.627566	3.099	0.464021	1.673	0.495517
ENSG00000133641	protein coding	de-novo	1	0	0.388021	0	0.144	0.305556	0.978	0.618609	2.479	0.695442
ENSG00000133704	protein coding	pre-existing	1	0	-0.292664	2	0.425	0.510588	3.114	0.5851	1.872	0.624466
ENSG00000133706	protein coding	basal-specific	0	0	-0.234308	1	0.545	0.588991	3.531	0.578873	5.509	0.607007
ENSG00000133789	protein coding	basal-specific	0	0	-0.00368035	1	0.451	0.59867	1.758	0.536974	3.023	0.606351
ENSG00000134001	protein coding	de-novo	1	0	0.619465	0	0.76	0.698684	0.948	0.587553	3.076	0.635891
ENSG00000134014	protein coding	basal-specific	0	0	0.888697	1	0.341	0.463343	1.644	0.537713	1.845	0.539837
ENSG00000134057	protein coding	de-novo	1	0	-0.295306	1	0.128	0.351562	1.302	0.5553	0.614	0.677524
ENSG00000134107	protein coding	de-novo	0	1	2.21501	2	0.282	0.343972	1.239	0.445521	1.631	0.56775
ENSG00000134108	protein coding	de-novo	1	0	0.882139	0	0.174	0.264368	0.561	0.561497	2.198	0.642857
ENSG00000134247	protein coding	de-novo	0	1	0.0171055	6	0.288	0.253472	2.64	0.426136	3.386	0.537507
ENSG00000134250	protein coding	de-novo	0	1	-1.41944	6	0.329	0.294833	7.416	0.462648	3.753	0.604583
ENSG00000134308	protein coding	de-novo	1	0	0.600643	0	0.216	0.217593	0.738	0.501355	1.319	0.642153
ENSG00000134313	protein coding	pre-existing	1	1	-1.61663	4	0.198	0.40404	5.316	0.546087	5.724	0.545073
ENSG00000134333	protein coding	de-novo	1	0	0.439147	0	0.357	0.464986	1.086	0.550645	1.144	0.627622
ENSG00000134375	protein coding	de-novo	1	0	-0.549119	1	0.024	0.458333	0.516	0.505814	1.11	0.641441
ENSG00000134440	protein coding	basal-specific	0	0	-0.101716	0	0.617	0.418152	1.647	0.541591	1.129	0.567759
ENSG00000134444	protein coding	basal-specific	0	0	-0.883408	0	0.251	0.354582	3.753	0.552625	4.715	0.664687
ENSG00000134453	protein coding	de-novo	0	1	-0.658883	2	0.644	0.389752	1.206	0.516584	1.901	0.661231
ENSG00000134602	protein coding	de-novo	1	0	#N/A	1	0.216	0.300926	1.317	0.585421	1.784	0.692265
ENSG00000134644	protein coding	basal-specific	0	0	-0.70009	0	0.261	0.440613	3.675	0.477279	1.705	0.659238
ENSG00000134684	protein coding	pre-existing	0	1	-0.76722	2	0.787	0.301144	1.587	0.499055	2.481	0.500605
ENSG00000134697	protein coding	de-novo	1	0	-0.668095	0	0.115	0.373913	2.196	0.54918	0.039	0.794872
ENSG00000134717	protein coding	de-novo	1	0	1.27859	1	0.196	0.515306	0.477	0.589099	3.958	0.63719
ENSG00000134970	protein coding	de-novo	1	0	#N/A	0	0.327	0.40367	0.675	0.518519	2.999	0.69123
ENSG00000134987	protein coding	de-novo	1	0	-0.167919	0	0.109	0.412844	2.688	0.58631	3.619	0.674772
ENSG00000135002	protein coding	de-novo	1	0	-0.64794	0	0.255	0.27451	0.468	0.564103	2.023	0.686604
ENSG00000135045	protein coding	de-novo	1	0	1.16153	1	0.301	0.262458	0.585	0.331624	1.465	0.664164
ENSG00000135048	protein coding	de-novo	1	0	-1.61272	2	0.478	0.594142	4.152	0.545039	3.587	0.562308
ENSG00000135069	protein coding	pre-existing	0	1	-0.155651	0	0.086	0.290698	1.113	0.532794	1.007	0.646475
ENSG00000135108	protein coding	pre-existing	1	1	-0.0966538	2			1.887	0.481717	4.096	0.582275
ENSG00000135333	protein coding	de-novo	1	0	0.352136	5	0.346	0.447977	2.997	0.557224	5.852	0.658749
ENSG00000135372	protein coding	basal-specific	0	0	-0.727063	2	0.192	0.369792	3.078	0.491553	0.716	0.476257
ENSG00000135476	protein coding	basal-specific	0	0	-0.298996	3	0.091	0.417582	6.363	0.4237	6.458	0.4297
ENSG00000135521	protein coding	de-novo	1	0	-0.913024	0	0.14	0.307143	1.428	0.587535	0.285	0.687719
ENSG00000135535	protein coding	de-novo	1	0	1.29104	0	0.163	0.588957	0.594	0.503367	2.337	0.67822
ENSG00000135723	protein coding	basal-specific	0	0	-0.173265	0	0.071	0.309859	3.495	0.387697	1.527	0.374591
ENSG00000135763	protein coding	de-novo	1	0	-1.40118	13	0.391	0.601023	4.575	0.489617	0.903	0.624585
ENSG00000135766	protein coding	de-novo	1	1	-0.687005	4	0.399	0.225564	1.281	0.391881	2.766	0.650036
ENSG00000135801	protein coding	de-novo	1	0	-1.97775	6	0.241	0.224066	1.77	0.472881	2.995	0.623706
ENSG00000135829	protein coding	de-novo	0	1	-0.883875	0	0.132	0.462121	3.813	0.552846	0.548	0.682482
ENSG00000135862	protein coding	de-novo	0	1	-0.490437	3	0.544	0.518382	4.83	0.484058	2.802	0.591363
ENSG00000135932	protein coding	de-novo	1	0	0.550853	0	0.554	0.398917	1.026	0.608187	2.371	0.635597
ENSG00000136010	protein coding	basal-specific	0	0	-1.18142	1	0.781	0.546735	2.799	0.547338	4.634	0.612214
ENSG00000136021	protein coding	de-novo	1	0	-0.400466	0	0.644	0.32764	2.802	0.612777	2.543	0.699961
ENSG00000136026	protein coding	de-novo	0	1	0.830075	7	0.494	0.479757	1.809	0.377557	1.143	0.573928
ENSG00000136045	protein coding	de-novo	1	0	0.0775978	1	0.274	0.427007	1.506	0.549801	0.942	0.63482
ENSG00000136068	protein coding	pre-existing	0	1	-2.07077	3	0.167	0.275449	7.902	0.44242	7.843	0.457351
ENSG00000136100	protein coding	de-novo	1	0	-0.949166	0	0.392	0.397959	1.161	0.544358	3.657	0.621821
ENSG00000136108	protein coding	de-novo	1	0	0.00376502	0	0.298	0.432886	2.052	0.608674	1.487	0.681237
ENSG00000136111	protein coding	pre-existing	0	1	-1.18335	7	0.402	0.238806	3.897	0.494226	3.289	0.625114
ENSG00000136143	protein coding	de-novo	0	1	0.220108	0	0.525	0.365714	1.455	0.573883	1.903	0.604834
ENSG00000136144	protein coding	de-novo	0	1	-1.47212	0	0.236	0.389831	1.596	0.522556	2.176	0.646599
ENSG00000136152	protein coding	de-novo	1	0	-0.711293	0	0.098	0.306122	2.487	0.56735	1.97	0.617259
ENSG00000136153	protein coding	basal-specific	0	0	-0.151462	0	1.305	0.660536	5.007	0.546036	1.947	0.644581
ENSG00000136193	protein coding	de-novo	0	1	0.823809	0	0.264	0.409091	1.305	0.489655	3.853	0.553335
ENSG00000136205	protein coding	basal-specific	0	0	-0.458291	2	0.374	0.371658	4.338	0.411019	5.006	0.494407
ENSG00000136436	protein coding	basal-specific	0	0	0.600804	0	0.685	0.440876	1.413	0.553432	2.24	0.575446
ENSG00000136448	protein coding	pre-existing	0	1	0.199798	7	0.341	0.580645	1.491	0.471496	4.915	0.472635
ENSG00000136463	protein coding	de-novo	0	1	0.696196	2	0.189	0.306878	0.894	0.45302	0.363	0.435262
ENSG00000136628	protein coding	pre-existing	1	1	-1.68798	0	0.142	0.330986	4.539	0.578542	0.799	0.599499
ENSG00000136636	protein coding	de-novo	0	1	-1.95638	1	0.382	0.230366	2.448	0.558824	1.189	0.695542
ENSG00000136709	protein coding	pre-existing	0	1	-1.52906	8	0.228	0.381579	4.011	0.46173	5.296	0.526246
ENSG00000136758	protein coding	pre-existing	1	0	0.0233522	0	1.056	0.443182	2.322	0.589147	2.007	0.63428
ENSG00000136813	protein coding	pre-existing	1	0	-1.47065	0	0.35	0.342857	6.054	0.530723	1.345	0.613383
ENSG00000136824	protein coding	basal-specific	0	0	-0.856518	0	0.336	0.508929	3.594	0.612688	2.104	0.669202
ENSG00000136861	protein coding	basal-specific	0	0	-1.63601	4	0.782	0.521739	5.682	0.520239	4.546	0.521337
ENSG00000136875	protein coding	de-novo	1	0	-0.669123	4	0.102	0.333333	1.569	0.506055	2.349	0.57599
ENSG00000136937	protein coding	basal-specific	0	0	-0.235725	0	0.214	0.271028	2.373	0.570164	2.549	0.630051
ENSG00000136940	protein coding	de-novo	0	1	-0.25221	3	0.123	0.390244	0.906	0.497792	1.988	0.67505
ENSG00000137040	protein coding	de-novo	1	0	-0.507231	8	0.018	0.5	3.318	0.591923	1.265	0.659289
ENSG00000137076	protein coding	pre-existing	0	1	-0.339801	2	0.154	0.272727	7.626	0.426436	0.843	0.455516
ENSG00000137124	protein coding	de-novo	1	1	-0.562936	0	0.194	0.376289	1.554	0.415701	1.359	0.573216
ENSG00000137200	protein coding	basal-specific	0	0	#N/A	1	0.164	0.280488	2.508	0.484051	1.363	0.458547
ENSG00000137492	protein coding	de-novo	1	0	#N/A	6	0.296	0.189189	2.286	0.590551	3.472	0.605703
ENSG00000137509	protein coding	de-novo	1	0	0.287837	0	0.691	0.570188	1.554	0.539254	2.475	0.616162
ENSG00000137574	protein coding	de-novo	1	0	-1.8621	3	0.173	0.32948	2.562	0.588603	2.848	0.601475
ENSG00000137656	protein coding	basal-specific	0	0	-1.04718	1	0.023	0.217391	1.86	0.483333	0.592	0.543919
ENSG00000137693	protein coding	de-novo	0	1	0.378023	2	0.445	0.498876	1.527	0.440733	3.484	0.652124
ENSG00000137760	protein coding	de-novo	0	1	-2.46592	3	0.433	0.554273	1.995	0.565915	1.931	0.666494
ENSG00000137770	protein coding	de-novo	1	0	-0.702747	1	0.306	0.421569	1.401	0.605996	4.864	0.67023
ENSG00000137807	protein coding	de-novo	1	1	-0.654833	0	0.22	0.318182	2.925	0.574359	2.401	0.608496
ENSG00000137815	protein coding	basal-specific	0	0	0.164891	0	0.021	0.0952381	2.133	0.517581	2.876	0.547636
ENSG00000138002	protein coding	basal-specific	0	0	-1.65923	0	0.488	0.495902	5.25	0.487048	5.712	0.489146
ENSG00000138029	protein coding	de-novo	1	0	0.423689	0	0.32	0.459375	1.425	0.531228	0.512	0.644531
ENSG00000138035	protein coding	de-novo	1	0	-0.880951	0	0.04	0.325	2.352	0.591837	3.037	0.6378
ENSG00000138081	protein coding	basal-specific	0	0	-0.599528	1	0.778	0.329049	2.784	0.579741	1.198	0.66778
ENSG00000138095	protein coding	pre-existing	1	1	-0.888219	0	0.089	0.314607	4.293	0.579315	4.932	0.598337
ENSG00000138138	protein coding	de-novo	0	1	0.606837	0	0.379	0.387863	1.086	0.588398	3.559	0.647092
ENSG00000138160	protein coding	pre-existing	1	0	-0.409703	0	0.246	0.300813	3.171	0.618102	3.286	0.628119
ENSG00000138180	protein coding	de-novo	1	0	-0.172201	0	0.324	0.32716	1.395	0.593548	0.939	0.661342
ENSG00000138182	protein coding	de-novo	1	0	-0.568904	2	0.092	0.445652	5.463	0.653304	0.891	0.700337
ENSG00000138231	protein coding	de-novo	1	0	-0.340726	4	0.154	0.428571	1.635	0.564526	1.615	0.617337
ENSG00000138246	protein coding	basal-specific	0	0	-2.00409	0	0.272	0.297794	6.732	0.588681	5.745	0.596171
ENSG00000138376	protein coding	de-novo	1	0	-0.882694	0	0.114	0.359649	2.334	0.56084	3.03	0.677888
ENSG00000138381	protein coding	de-novo	1	0	-2.65809	4	0.448	0.53125	1.932	0.610248	0.105	0.790476
ENSG00000138413	protein coding	de-novo	1	0	0.490986	0	0.481	0.492723	1.245	0.55502	0.85	0.645882
ENSG00000138614	protein coding	de-novo	1	1	-0.268505	4	0.388	0.396907	1.665	0.535736	2.436	0.544745
ENSG00000138641	protein coding	basal-specific	0	0	-0.534576	0	0.366	0.513661	3.153	0.539169	1.581	0.645161
ENSG00000138660	protein coding	de-novo	1	1	-2.29615	0	0.305	0.295082	0.909	0.575358	4.701	0.64114
ENSG00000138678	protein coding	de-novo	0	1	#N/A	0	0.515	0.320388	1.305	0.534866	1.108	0.638087
ENSG00000138757	protein coding	de-novo	1	0	-1.18364	5	0.584	0.515411	1.449	0.551415	4.471	0.630731
ENSG00000138760	protein coding	de-novo	1	0	-0.142551	0	0.591	0.551607	1.56	0.541667	3.919	0.612146
ENSG00000138771	protein coding	basal-specific	0	0	-0.726754	5	0.824	0.605583	5.991	0.409114	4.076	0.604024
ENSG00000138801	protein coding	pre-existing	0	1	0.209923	0	0.055	0.272727	1.875	0.531733	0.583	0.679245
ENSG00000138802	protein coding	basal-specific	0	0	-0.254383	0	0.098	0.27551	3.897	0.550167	1.221	0.637183
ENSG00000138829	protein coding	de-novo	0	1	0.0056209	1	0.975	0.484103	8.739	0.504062	1.546	0.644243
ENSG00000139163	protein coding	de-novo	1	0	-0.0464623	0	0.29	0.272414	1.359	0.50699	5.711	0.6962
ENSG00000139197	protein coding	basal-specific	0	0	0.0370118	0	0.58	0.387931	1.983	0.425113	1.26	0.523016
ENSG00000139372	protein coding	de-novo	1	1	0.572556	0	0.479	0.498956	1.233	0.581509	1.784	0.65583
ENSG00000139613	protein coding	basal-specific	0	0	0.390755	0	0.106	0.160377	3.738	0.44489	3.4	0.453529
ENSG00000139641	protein coding	basal-specific	0	0	-0.0804142	1	0.276	0.358696	3.345	0.446936	0.812	0.479064
ENSG00000139651	protein coding	de-novo	0	1	-0.363638	0	0.423	0.463357	0.582	0.508591	7.552	0.478549
ENSG00000139687	protein coding	basal-specific	0	0	0.725195	0	0.169	0.307692	2.787	0.609975	1.819	0.686641
ENSG00000139726	protein coding	de-novo	1	0	0.211839	0	0.136	0.272059	0.597	0.599665	1.986	0.640987
ENSG00000139734	protein coding	basal-specific	0	0	-1.36842	0	0.179	0.575419	3.582	0.581798	1.001	0.688312
ENSG00000139800	protein coding	de-novo	1	0	0.602727	3	0.164	0.512195	1.92	0.301562	2.413	0.669291
ENSG00000139842	protein coding	de-novo	1	1	0.1398	3	0.567	0.306878	2.28	0.516228	3.526	0.608054
ENSG00000139926	protein coding	de-novo	1	0	-0.191426	2	0.493	0.494929	1.869	0.520064	2.698	0.653076
ENSG00000140105	protein coding	basal-specific	0	0	0.656473	0	0.833	0.411765	1.416	0.491525	1.085	0.529954
ENSG00000140259	protein coding	basal-specific	0	0	0.247811	2	0.121	0.495868	1.32	0.524242	0.602	0.609635
ENSG00000140299	protein coding	de-novo	1	0	-0.345644	0	0.253	0.320158	0.981	0.616718	4.923	0.650213
ENSG00000140320	protein coding	basal-specific	0	0	1.5661	3	0.33	0.172727	2.343	0.367051	2.106	0.461064
ENSG00000140382	protein coding	de-novo	0	1	-1.04022	1	0.428	0.549065	1.044	0.516284	2.64	0.574621
ENSG00000140391	protein coding	de-novo	0	1	-0.0189996	0	0.699	0.490701	0.762	0.513123	5.431	0.535997
ENSG00000140396	protein coding	basal-specific	0	0	-1.84189	4	0.501	0.355289	4.395	0.503072	3.85	0.644156
ENSG00000140406	protein coding	de-novo	0	1	-1.94753	7	1.349	0.25871	1.089	0.303949	2.428	0.614498
ENSG00000140450	protein coding	de-novo	1	1	0.34126	2	0.159	0.232704	1.257	0.47494	2.646	0.62963
ENSG00000140521	protein coding	basal-specific	0	0	-2.54448	0	0.336	0.339286	3.72	0.395699	3.59	0.436212
ENSG00000140525	protein coding	basal-specific	0	0	-1.51254	0	0.497	0.549296	4.119	0.564943	0.802	0.5798
ENSG00000140553	protein coding	basal-specific	0	0	-1.1117	1	0.835	0.349701	3.255	0.405223	3.37	0.403264
ENSG00000140575	protein coding	pre-existing	1	1	-1.43828	0	0.429	0.475524	4.974	0.540209	2.192	0.582117
ENSG00000140632	protein coding	pre-existing	0	1	-0.118679	3	0.023	0.347826	1.662	0.472323	3.362	0.484236
ENSG00000140718	protein coding	basal-specific	0	0	-0.581715	2	0.222	0.396396	1.68	0.516667	10.026	0.540993
ENSG00000140829	protein coding	basal-specific	0	0	-1.27955	3	0.296	0.449324	3.684	0.431868	1.605	0.424299
ENSG00000140943	protein coding	de-novo	1	0	-2.62886	5	0.538	0.501859	3.159	0.481165	0.686	0.540816
ENSG00000141027	protein coding	basal-specific	0	0	-2.08518	5	0.829	0.486128	7.323	0.515909	3.139	0.639694
ENSG00000141219	protein coding	de-novo	1	0	-0.716943	8	0.604	0.397351	1.83	0.556831	1.618	0.602596
ENSG00000141252	protein coding	basal-specific	0	0	0.812424	3	0.909	0.511551	2.499	0.492997	10.46	0.502294
ENSG00000141279	protein coding	pre-existing	0	1	0.106647	0	0.193	0.222798	2.775	0.536937	4.805	0.597086
ENSG00000141367	protein coding	pre-existing	1	0	0.109735	0	0.423	0.347518	5.049	0.577936	3.104	0.619523
ENSG00000141376	protein coding	basal-specific	0	0	-0.492613	0	0.195	0.389744	2.853	0.500526	0.818	0.432763
ENSG00000141385	protein coding	pre-existing	0	1	-1.18766	3	0.145	0.206897	2.394	0.521721	2.598	0.529638
ENSG00000141429	protein coding	de-novo	1	1	-1.53169	0	0.226	0.420354	1.68	0.581548	2.064	0.676841
ENSG00000141456	protein coding	basal-specific	0	0	1.1225	3	0.749	0.356475	3.543	0.384984	2.811	0.397723
ENSG00000141543	protein coding	de-novo	1	1	-0.111354	0	0.178	0.258427	1.236	0.492718	1.121	0.556646
ENSG00000141556	protein coding	basal-specific	0	0	-0.33931	0	0.906	0.439294	3.846	0.421477	6.669	0.464387
ENSG00000141569	protein coding	de-novo	0	1	-0.210064	4			1.554	0.324968	1.816	0.511564
ENSG00000141570	protein coding	basal-specific	0	0	-0.610539	2	0.139	0.266187	1.17	0.371795	2.503	0.452257
ENSG00000141580	protein coding	de-novo	1	0	-0.806861	3	0.108	0.203704	1.035	0.518841	1.717	0.498544
ENSG00000141582	protein coding	de-novo	1	0	0.240134	8	0.189	0.142857	1.683	0.345217	0.803	0.505604
ENSG00000141682	protein coding	de-novo	1	0	4.1235	4	0.182	0.340659	0.411	0.462287	1.552	0.686211
ENSG00000141959	protein coding	basal-specific	0	0	#N/A	0	0.055	0.181818	2.343	0.377721	3.206	0.370243
ENSG00000142166	protein coding	de-novo	1	0	-1.45618	0	0.523	0.42065	1.674	0.632019	5.572	0.584171
ENSG00000142186	protein coding	basal-specific	0	0	-0.797558	1	0.479	0.382046	2.427	0.386073	0.37	0.367568
ENSG00000142192	protein coding	de-novo	1	1	0.796334	0	0.266	0.503759	2.313	0.477302	1.12	0.630357
ENSG00000142207	protein coding	pre-existing	1	1	-2.01101	8	0.102	0.313725	6.816	0.44689	3.9	0.518205
ENSG00000142556	protein coding	de-novo	1	0	-1.20914	4	0.601	0.572379	1.758	0.591581	2.516	0.647456
ENSG00000142875	protein coding	de-novo	1	0	-0.592267	0	0.326	0.613497	1.197	0.601504	3.193	0.660507
ENSG00000142892	protein coding	de-novo	1	0	-0.659959	0	0.028	0.428571	1.188	0.594276	3.385	0.672378
ENSG00000142945	protein coding	basal-specific	0	0	0.436323	0	0.351	0.461538	2.178	0.497245	0.588	0.508503
ENSG00000143013	protein coding	de-novo	1	0	1.68358	0	0.368	0.342391	0.498	0.455823	4.127	0.624667
ENSG00000143033	protein coding	de-novo	1	0	-1.57683	2	0.518	0.472973	1.782	0.583614	2.052	0.685673
ENSG00000143093	protein coding	basal-specific	0	0	-0.548952	2	0.169	0.497041	2.514	0.44829	2.718	0.47167
ENSG00000143106	protein coding	de-novo	1	0	0.142312	0	0.952	0.582983	0.726	0.541322	2.971	0.650623
ENSG00000143149	protein coding	pre-existing	1	0	0.296056	0			1.557	0.506101	0.834	0.621103
ENSG00000143153	protein coding	de-novo	0	1	1.06678	1	0.574	0.60453	0.957	0.532915	3.454	0.634916
ENSG00000143155	protein coding	de-novo	1	0	0.0259329	0	0.116	0.327586	0.819	0.58486	2.063	0.671352
ENSG00000143157	protein coding	de-novo	1	0	-1.97527	9	0.36	0.486111	1.83	0.460656	4.064	0.584154
ENSG00000143183	protein coding	de-novo	1	0	0.199081	0	0.703	0.428165	0.72	0.525	3.73	0.653351
ENSG00000143337	protein coding	de-novo	1	0	-0.389947	2	0.461	0.386117	1.8	0.505556	1.838	0.644178
ENSG00000143373	protein coding	basal-specific	0	0	-0.399676	8	0.97	0.476289	3.714	0.392299	1.702	0.410693
ENSG00000143374	protein coding	pre-existing	0	1	0.0595737	2	0.037	0.540541	2.157	0.443208	1.682	0.446492
ENSG00000143379	protein coding	basal-specific	0	0	-0.747034	4	0.198	0.439394	3.879	0.490848	0.38	0.523684
ENSG00000143384	protein coding	de-novo	1	1	-0.130972	9	0.208	0.427885	1.053	0.390313	3.199	0.612691
ENSG00000143437	protein coding	basal-specific	0	0	-0.467588	0	0.224	0.316964	2.37	0.489873	2.314	0.579948
ENSG00000143476	protein coding	basal-specific	0	0	-0.758964	2	0.338	0.387574	2.193	0.534428	2.073	0.654607
ENSG00000143514	protein coding	pre-existing	0	1	-1.17356	2	0.769	0.418726	3.405	0.518943	1.647	0.536126
ENSG00000143569	protein coding	basal-specific	0	0	0.521655	0	0.167	0.443114	3.264	0.469363	0.591	0.558376
ENSG00000143641	protein coding	pre-existing	0	1	-0.880273	3	0.043	0.209302	1.716	0.447552	2.664	0.447072
ENSG00000143751	protein coding	pre-existing	1	1	-0.566224	5	0.031	0.419355	1.356	0.488201	2.6	0.644615
ENSG00000143756	protein coding	de-novo	1	0	-1.07954	3			1.107	0.507678	4.301	0.644269
ENSG00000143799	protein coding	pre-existing	0	1	-0.963421	0	0.171	0.292398	3.045	0.487685	3.796	0.515279
ENSG00000143815	protein coding	de-novo	1	0	-0.583562	0	0.581	0.299484	1.848	0.558983	1.801	0.695725
ENSG00000143870	protein coding	de-novo	1	0	-0.50118	0	0.952	0.50105	1.479	0.50169	0.867	0.641292
ENSG00000143878	protein coding	pre-existing	0	1	-0.141356	7	0.392	0.252551	0.591	0.36379	1.384	0.500723
ENSG00000143933	protein coding	de-novo	1	0	-0.290226	0	0.408	0.529412	0.591	0.580372	1.046	0.642447
ENSG00000144028	protein coding	pre-existing	0	1	-0.233023	0	0.34	0.426471	6.411	0.475121	0.674	0.520772
ENSG00000144161	protein coding	de-novo	1	0	-0.586121	0	0.061	0.409836	0.876	0.622146	4.955	0.601816
ENSG00000144228	protein coding	de-novo	1	0	-0.924311	0	0.41	0.309756	1.179	0.592875	4.467	0.683009
ENSG00000144354	protein coding	de-novo	1	0	-0.32752	0	0.144	0.208333	1.353	0.515152	3.332	0.607443
ENSG00000144909	protein coding	de-novo	1	0	-1.39863	2	0.697	0.403156	2.244	0.55615	1.657	0.669282
ENSG00000145041	protein coding	basal-specific	0	0	#N/A	5	0.198	0.414141	4.524	0.520999	1.292	0.51161
ENSG00000145147	protein coding	de-novo	0	1	-1.33473	6	1.911	0.352695	4.629	0.533377	1.552	0.650129
ENSG00000145362	protein coding	basal-specific	0	0	-0.634685	0	0.648	0.498457	11.988	0.525692	3.862	0.586743
ENSG00000145386	protein coding	de-novo	1	0	-0.183668	0	0.255	0.290196	1.299	0.540416	1.194	0.686767
ENSG00000145391	protein coding	de-novo	1	0	-0.911704	2	0.632	0.330696	1.101	0.502271	5.625	0.594489
ENSG00000145555	protein coding	basal-specific	0	0	0.50564	3	0.48	0.2875	6.21	0.479066	4.785	0.565099
ENSG00000145569	protein coding	de-novo	0	1	1.64302	5	0.103	0.194175	1.071	0.560224	5.866	0.612683
ENSG00000145604	protein coding	de-novo	1	0	-0.677165	0	0.274	0.354015	1.377	0.517066	5.347	0.63905
ENSG00000145675	protein coding	de-novo	1	0	-0.864022	8	1.625	0.545846	2.199	0.579354	4.22	0.632464
ENSG00000145703	protein coding	basal-specific	0	0	-0.20612	0	0.261	0.252874	4.728	0.583333	1.799	0.632574
ENSG00000145725	protein coding	de-novo	1	0	-1.45763	0	0.573	0.561955	3.837	0.602293	11.165	0.638065
ENSG00000145730	protein coding	de-novo	0	1	-0.0897809	0	0.939	0.277955	2.925	0.549402	3.125	0.57152
ENSG00000145833	protein coding	basal-specific	0	0	-0.0713485	0	0.168	0.375	3.099	0.570184	2.415	0.684058
ENSG00000145901	protein coding	de-novo	0	1	-0.659771	1	0.241	0.240664	1.911	0.412873	0.834	0.444844
ENSG00000145907	protein coding	pre-existing	1	1	-0.0540219	0	0.445	0.379775	1.431	0.513627	10.072	0.620135
ENSG00000146085	protein coding	basal-specific	0	0	0.162475	0	0.19	0.378947	2.253	0.573014	1.368	0.692982
ENSG00000146223	protein coding	de-novo	1	0	0.326757	1	0.295	0.471186	0.768	0.527344	3.436	0.555879
ENSG00000146376	protein coding	basal-specific	0	0	-0.68281	0	0.041	0.487805	1.992	0.559739	2.381	0.684586
ENSG00000146457	protein coding	de-novo	1	0	-0.635677	5	1.757	0.52362	1.191	0.532326	2.478	0.594431
ENSG00000146729	protein coding	de-novo	1	0	0.471389	0	0.576	0.439236	0.861	0.502904	1.109	0.666366
ENSG00000146731	protein coding	de-novo	0	1	-0.417889	0	0.164	0.286585	1.596	0.550125	0.904	0.640487
ENSG00000146833	protein coding	de-novo	1	0	-0.37489	0	0.13	0.307692	1.503	0.471058	1.76	0.60625
ENSG00000146918	protein coding	pre-existing	0	1	-0.560043	0	0.195	0.538462	3.471	0.555748	2.769	0.561575
ENSG00000147044	protein coding	de-novo	0	1	0.120731	0	0.566	0.208481	2.868	0.550209	5.486	0.581298
ENSG00000147065	protein coding	pre-existing	0	1	0.485914	0	0.375	0.48	1.734	0.469435	3.738	0.502943
ENSG00000147130	protein coding	basal-specific	0	0	0.351138	2	0.698	0.406877	4.119	0.441369	1.292	0.499226
ENSG00000147133	protein coding	basal-specific	0	0	-1.5171	0	0.153	0.444444	5.724	0.529525	2.892	0.566736
ENSG00000147140	protein coding	basal-specific	0	0	0.242384	0	0.708	0.516949	1.548	0.484496	2.707	0.533801
ENSG00000147224	protein coding	de-novo	1	0	0.00100595	1	0.201	0.393035	0.966	0.521739	1.273	0.528672
ENSG00000147251	protein coding	pre-existing	1	0	-0.851345	0	0.157	0.178344	6.234	0.599134	0.472	0.65678
ENSG00000147274	protein coding	de-novo	1	0	-0.477391	1	0.336	0.419643	1.176	0.508503	4.498	0.617386
ENSG00000147324	protein coding	de-novo	1	1	-1.32457	11	0.572	0.16958	3.159	0.384615	2.668	0.602699
ENSG00000147457	protein coding	de-novo	0	1	-0.087004	0	0.648	0.438272	1.362	0.43025	2.345	0.488699
ENSG00000147649	protein coding	de-novo	1	1	-0.763335	1	0.323	0.260062	1.749	0.515152	5.59	0.6161
ENSG00000147874	protein coding	de-novo	1	0	-2.06253	1	0.253	0.395257	2.868	0.612971	3.202	0.658026
ENSG00000148308	protein coding	basal-specific	0	0	0.50226	3	0.44	0.372727	1.581	0.419355	0.523	0.386233
ENSG00000148396	protein coding	basal-specific	0	0	0.0609052	5	0.319	0.394984	7.074	0.422109	2.037	0.474718
ENSG00000148468	protein coding	de-novo	1	1	-0.986141	6	0.237	0.135021	2.673	0.432847	1.272	0.562893
ENSG00000148498	protein coding	pre-existing	0	1	-0.0701232	0	0.685	0.554745	4.071	0.507983	1.609	0.540709
ENSG00000148572	protein coding	de-novo	1	0	-0.0286322	3	0.169	0.260355	0.864	0.546296	0.813	0.648216
ENSG00000148606	protein coding	pre-existing	1	1	-0.697126	1	0.115	0.356522	4.173	0.502277	5.676	0.506519
ENSG00000148773	protein coding	basal-specific	0	0	-0.965267	31	0.414	0.316425	9.771	0.52533	2.531	0.515211
ENSG00000148843	protein coding	pre-existing	0	1	-1.63097	4	0.116	0.387931	5.619	0.472326	0.745	0.457718
ENSG00000148943	protein coding	de-novo	1	0	0.174081	0	0.017	0.529412	0.594	0.555556	4.231	0.683763
ENSG00000149115	protein coding	basal-specific	0	0	-1.71267	10	0.312	0.461538	5.19	0.373796	3.426	0.395797
ENSG00000149136	protein coding	basal-specific	0	0	-0.870614	0	0.429	0.440559	2.13	0.485446	0.419	0.51074
ENSG00000149269	protein coding	basal-specific	0	0	-0.0669584	0	0.564	0.294326	1.662	0.524669	1.257	0.559268
ENSG00000149289	protein coding	de-novo	1	0	-1.15161	3	0.881	0.678774	2.655	0.53145	6.104	0.669725
ENSG00000149313	protein coding	de-novo	1	0	0.0374895	0	0.088	0.636364	0.93	0.566667	1.788	0.678971
ENSG00000149474	protein coding	de-novo	0	1	#N/A	7	1.07	0.44486	2.349	0.51639	2.513	0.524473
ENSG00000149480	protein coding	basal-specific	0	0	-0.930182	1	0.744	0.444892	2.007	0.465371	0.661	0.499244
ENSG00000149503	protein coding	basal-specific	0	0	0.209762	1	0.177	0.367232	2.757	0.385564	1.193	0.483655
ENSG00000149658	protein coding	de-novo	1	0	-0.0249965	6	0.247	0.194332	1.68	0.436905	1.279	0.61767
ENSG00000149782	protein coding	basal-specific	0	0	-1.44605	0	0.12	0.158333	3.705	0.381916	0.661	0.403933
ENSG00000149823	protein coding	basal-specific	0	0	-0.969868	0	0.227	0.471366	2.349	0.345253	0.861	0.376307
ENSG00000150054	protein coding	de-novo	1	0	1.37291	0	0.355	0.515493	1.731	0.572501	3.397	0.657639
ENSG00000150093	protein coding	de-novo	1	1	0.814871	0	1.014	0.625247	2.478	0.580307	3.44	0.613953
ENSG00000150347	protein coding	de-novo	0	1	1.22835	4	0.269	0.427509	3.567	0.495655	3.914	0.612417
ENSG00000150593	protein coding	de-novo	0	1	0.787743	0	0.403	0.473945	1.41	0.58227	1.918	0.660063
ENSG00000150760	protein coding	pre-existing	0	1	-1.93748	0	0.109	0.330275	5.661	0.518283	1.09	0.597248
ENSG00000150768	protein coding	de-novo	1	0	-0.341037	0	0.197	0.583756	1.944	0.51286	3.217	0.636307
ENSG00000150893	protein coding	de-novo	1	0	-0.324654	17	0.268	0.320896	9.51	0.494637	6.344	0.653373
ENSG00000151135	protein coding	de-novo	1	0	#N/A	2	0.41	0.32439	0.351	0.527066	2.645	0.675236
ENSG00000151150	protein coding	basal-specific	0	0	-0.998585	0	0.649	0.57319	13.134	0.552916	3.548	0.643743
ENSG00000151239	protein coding	de-novo	1	0	0.888706	0	0.537	0.484171	1.074	0.604283	2.943	0.654434
ENSG00000151240	protein coding	basal-specific	0	0	0.0477406	2	0.09	0.211111	4.869	0.424317	3.135	0.599681
ENSG00000151276	protein coding	basal-specific	0	0	-1.08703	7	0.61	0.391803	4.389	0.451811	3.551	0.57336
ENSG00000151445	protein coding	basal-specific	0	0	-0.199938	1	0.511	0.434442	1.56	0.513462	0.941	0.524973
ENSG00000151491	protein coding	basal-specific	0	0	1.09282	0	1.579	0.609246	2.52	0.55	2.888	0.606994
ENSG00000151503	protein coding	basal-specific	0	0	-0.844761	0	0.628	0.41242	4.497	0.517678	4.604	0.51477
ENSG00000151553	protein coding	de-novo	1	0	-0.500074	0	0.335	0.214925	2.298	0.575283	3.177	0.673277
ENSG00000151726	protein coding	de-novo	1	0	0.61553	0	0.522	0.404215	2.097	0.51216	2.073	0.524361
ENSG00000151779	protein coding	pre-existing	0	1	-1.72343	0	0.429	0.55711	7.116	0.540472	3.114	0.611432
ENSG00000151835	protein coding	de-novo	1	0	-1.95981	15	2.334	0.510711	13.767	0.609864	1.504	0.600399
ENSG00000151893	protein coding	de-novo	1	0	-0.307553	2	0.487	0.279261	1.11	0.504505	9.717	0.619636
ENSG00000152102	protein coding	de-novo	0	1	1.60232	0	0.258	0.236434	0.588	0.408163	4.589	0.545217
ENSG00000152127	protein coding	de-novo	0	1	-1.42911	6	0.332	0.566265	2.226	0.525157	5.774	0.509872
ENSG00000152332	protein coding	de-novo	1	0	-1.38552	0	0.196	0.295918	1.26	0.513492	7.215	0.652945
ENSG00000152455	protein coding	de-novo	1	0	-0.910312	4	0.401	0.65586	1.233	0.596107	2.752	0.618823
ENSG00000152465	protein coding	basal-specific	0	0	-0.676273	0	0.098	0.306122	1.497	0.532398	3.425	0.574015
ENSG00000152556	protein coding	basal-specific	0	0	-0.0728638	0	0.289	0.602076	2.652	0.477753	3.007	0.484536
ENSG00000152700	protein coding	de-novo	1	0	1.2445	1	1.373	0.417334	0.597	0.589615	5.801	0.625409
ENSG00000152778	protein coding	de-novo	1	0	0.834414	4	0.566	0.491166	1.449	0.57695	2.872	0.663997
ENSG00000152795	protein coding	de-novo	1	0	#N/A	2	0.772	0.294041	1.263	0.496437	2.341	0.645023
ENSG00000152818	protein coding	basal-specific	0	0	-1.441	0	0.579	0.464594	10.302	0.551835	2.037	0.671576
ENSG00000152990	protein coding	de-novo	0	1	#N/A	5	0.442	0.565611	3.966	0.524206	0.806	0.668734
ENSG00000153006	protein coding	de-novo	1	0	-1.54639	0	0.174	0.396552	0.468	0.651709	6.236	0.656992
ENSG00000153113	protein coding	de-novo	1	0	0.149477	0	0.306	0.496732	2.376	0.530303	4.078	0.603482
ENSG00000153147	protein coding	pre-existing	0	1	-0.887487	1	0.223	0.304933	3.159	0.58911	4.302	0.652487
ENSG00000153187	protein coding	de-novo	0	1	-0.448008	0	1.871	0.645644	2.478	0.496368	4.831	0.645415
ENSG00000153201	protein coding	de-novo	1	0	-1.63903	6	0.125	0.304	9.675	0.598863	4.053	0.630397
ENSG00000153207	protein coding	de-novo	1	0	-2.11919	1	0.378	0.26455	6.906	0.588908	1.708	0.690281
ENSG00000153310	protein coding	de-novo	1	0	-0.367559	0	0.669	0.487294	0.975	0.6	2.549	0.610435
ENSG00000153561	protein coding	de-novo	0	1	-0.774175	3	0.377	0.222812	1.176	0.541667	4.63	0.616847
ENSG00000153767	protein coding	de-novo	1	0	-0.383755	2	0.395	0.546835	1.32	0.521212	1.599	0.612258
ENSG00000153827	protein coding	pre-existing	1	1	-0.957927	6	0.286	0.374126	6.207	0.55373	3.717	0.632768
ENSG00000153922	protein coding	de-novo	1	0	-1.40056	0	0.617	0.387358	5.133	0.610364	2.395	0.690605
ENSG00000153933	protein coding	de-novo	1	0	-0.334131	0	0.172	0.255814	1.704	0.518779	6.776	0.632527
ENSG00000153936	protein coding	de-novo	1	0	-0.65812	1	0.402	0.283582	1.071	0.570495	6.313	0.646602
ENSG00000153989	protein coding	de-novo	1	0	-0.305208	1	0.202	0.277228	0.882	0.461451	3.712	0.676724
ENSG00000154174	protein coding	de-novo	1	1	#N/A	1	0.14	0.4	1.827	0.545703	2.133	0.639944
ENSG00000154310	protein coding	basal-specific	0	0	-0.489319	1	0.345	0.35942	4.083	0.505266	5.467	0.634169
ENSG00000154359	protein coding	de-novo	1	1	-0.447952	0	1.667	0.516497	2.322	0.484927	2.35	0.622553
ENSG00000154429	protein coding	de-novo	1	0	-0.0110977	3	0.208	0.605769	0.813	0.397294	4.224	0.654356
ENSG00000154473	protein coding	de-novo	1	0	0.191553	0	0.084	0.357143	0.987	0.51773	6.632	0.602986
ENSG00000154642	protein coding	de-novo	1	0	-0.506185	0	0.169	0.224852	0.894	0.59396	4.441	0.687683
ENSG00000155090	protein coding	basal-specific	0	0	-0.0137401	2	0.903	0.369878	1.443	0.500347	1.348	0.660237
ENSG00000155096	protein coding	de-novo	1	0	-1.63691	0	0.777	0.485199	1.44	0.599306	3.069	0.645161
ENSG00000155189	protein coding	de-novo	1	0	-0.455403	0	0.027	0.296296	1.095	0.549772	4.115	0.653949
ENSG00000155304	protein coding	de-novo	1	0	-0.711448	4	0.027	0.407407	1.416	0.573446	2.502	0.703837
ENSG00000155363	protein coding	basal-specific	0	0	0.254393	0	2.044	0.521526	3.072	0.426432	1.415	0.413428
ENSG00000155438	protein coding	de-novo	1	0	#N/A	0	0.265	0.607547	0.882	0.588435	0.779	0.652118
ENSG00000155545	protein coding	de-novo	1	0	-1.25206	3	0.165	0.351515	1.668	0.574341	4.86	0.644856
ENSG00000155561	protein coding	pre-existing	1	1	-0.882797	0	0.028	0.464286	6.039	0.551416	0.979	0.578141
ENSG00000155660	protein coding	de-novo	1	1	-0.233021	3	0.254	0.251969	2.085	0.471463	0.732	0.532787
ENSG00000155755	protein coding	de-novo	1	0	-1.32244	0	0.449	0.467706	1.227	0.549307	4.071	0.60845
ENSG00000155827	protein coding	pre-existing	0	1	-1.16905	1	0.348	0.462644	2.928	0.525956	0.922	0.623644
ENSG00000155858	protein coding	de-novo	0	1	-0.298341	1	0.039	0.384615	1.083	0.381348	5.445	0.593388
ENSG00000155959	protein coding	de-novo	1	0	-0.219097	1	0.163	0.650307	0.594	0.579125	0.999	0.674675
ENSG00000156136	protein coding	de-novo	1	0	1.03161	0	0.383	0.454308	0.954	0.579665	2.263	0.679629
ENSG00000156256	protein coding	de-novo	1	0	-2.09097	0	0.258	0.46124	2.472	0.620146	0.301	0.72093
ENSG00000156299	protein coding	de-novo	0	1	-2.00967	6	0.533	0.476548	4.776	0.46273	2.425	0.572371
ENSG00000156304	protein coding	basal-specific	0	0	0.625982	2	0.426	0.241784	3.444	0.500581	0.399	0.659148
ENSG00000156374	protein coding	de-novo	1	0	-0.112502	0	0.078	0.230769	1.053	0.503324	1.471	0.585316
ENSG00000156515	protein coding	basal-specific	0	0	0.622983	0	0.499	0.529058	2.766	0.468185	3.371	0.462771
ENSG00000156535	protein coding	de-novo	1	0	-0.0861829	0	0.431	0.417633	4.338	0.593822	4.683	0.637412
ENSG00000156675	protein coding	basal-specific	0	0	0.319037	8	0.639	0.539906	3.852	0.448598	4.277	0.553659
ENSG00000156709	protein coding	pre-existing	0	1	-0.169789	0	0.905	0.521547	1.869	0.505618	2.104	0.565114
ENSG00000156802	protein coding	de-novo	1	0	-0.599167	0	2.384	0.550755	4.173	0.586628	4.723	0.626509
ENSG00000156875	protein coding	de-novo	1	0	#N/A	0	0.138	0.275362	1.473	0.54854	1.168	0.696062
ENSG00000156970	protein coding	basal-specific	0	0	-0.138691	0	0.154	0.376623	3.195	0.567449	0.587	0.570698
ENSG00000156983	protein coding	basal-specific	0	0	-1.77056	6	1.157	0.444252	3.762	0.423711	2.305	0.421258
ENSG00000157483	protein coding	basal-specific	0	0	-0.136462	1	0.371	0.339623	3.327	0.513075	4.946	0.545289
ENSG00000157514	protein coding	de-novo	1	1	0.0982795	3	0.5	0.372	0.603	0.414594	1.298	0.533898
ENSG00000157540	protein coding	de-novo	1	0	-1.07852	6	1.47	0.661224	2.292	0.53534	13.827	0.576047
ENSG00000157827	protein coding	de-novo	1	0	-1.37403	0	0.43	0.227907	3.279	0.553522	2.062	0.64064
ENSG00000158301	protein coding	de-novo	0	1	#N/A	0	0.803	0.494396	2.517	0.522447	0.347	0.654179
ENSG00000158545	protein coding	basal-specific	0	0	0.280709	3	0.178	0.314607	2.934	0.400136	0.665	0.514286
ENSG00000158615	protein coding	de-novo	1	0	-1.96687	11	0.476	0.352941	2.142	0.501401	2.966	0.637896
ENSG00000158623	protein coding	basal-specific	0	0	0.760099	0	0.08	0.2875	2.616	0.555046	0.855	0.640936
ENSG00000158669	protein coding	de-novo	1	0	#N/A	7	1.014	0.45858	1.371	0.498177	4	0.4655
ENSG00000158864	protein coding	basal-specific	0	0	0.164656	0	0.451	0.430155	1.455	0.476289	1.706	0.497069
ENSG00000158941	protein coding	basal-specific	0	0	#N/A	0	0.695	0.420144	2.772	0.414502	1.068	0.449438
ENSG00000159086	protein coding	de-novo	1	0	-2.3526	1	0.087	0.218391	2.754	0.568627	1.365	0.638828
ENSG00000159131	protein coding	de-novo	1	0	-0.185548	0	0.343	0.463557	3.033	0.534784	2.307	0.551799
ENSG00000159140	protein coding	pre-existing	1	0	-0.979985	21	0.055	0.363636	7.281	0.517374	1.539	0.606238
ENSG00000159200	protein coding	de-novo	0	1	0.216133	2	0.732	0.546448	0.834	0.47482	1.642	0.590743
ENSG00000159256	protein coding	de-novo	1	0	-0.885717	2	0.068	0.352941	2.82	0.6	1.336	0.703593
ENSG00000159259	protein coding	basal-specific	0	0	0.136113	2	0.137	0.394161	1.68	0.492262	2.649	0.534541
ENSG00000159399	protein coding	de-novo	1	1	-0.103946	0	0.454	0.332599	2.754	0.436093	2.418	0.592225
ENSG00000159459	protein coding	basal-specific	0	0	-0.886595	0	0.091	0.373626	5.25	0.57981	2.432	0.653783
ENSG00000160007	protein coding	pre-existing	0	1	-2.04877	13	0.401	0.349127	4.5	0.522667	4.389	0.431989
ENSG00000160131	protein coding	de-novo	1	0	0.863552	0	0.123	0.463415	0.471	0.424628	4.306	0.645379
ENSG00000160208	protein coding	de-novo	1	1	-1.27505	7	0.105	0.2	2.277	0.463768	2.696	0.533012
ENSG00000160211	protein coding	basal-specific	0	0	1.81135	0	0.267	0.243446	1.746	0.422108	1.992	0.38755
ENSG00000160294	protein coding	pre-existing	0	1	-1.72581	9	0.594	0.367003	5.943	0.466431	0.135	0.607407
ENSG00000160352	protein coding	de-novo	1	0	-1.88048	2	0.491	0.556008	1.668	0.622902	6.762	0.642266
ENSG00000160551	protein coding	de-novo	1	0	-1.31374	2	0.756	0.28836	3.006	0.552894	8.881	0.641144
ENSG00000160633	protein coding	pre-existing	0	1	0.204082	0	0.171	0.350877	2.754	0.43573	2.216	0.42509
ENSG00000160710	protein coding	pre-existing	1	1	-0.605977	9	1.436	0.444986	3.681	0.488454	6.392	0.510013
ENSG00000160789	protein coding	basal-specific	0	0	1.71823	1	0.841	0.432818	2.19	0.364384	1.981	0.403332
ENSG00000161021	protein coding	de-novo	0	1	-0.21093	7	0.291	0.233677	3.051	0.393641	2.406	0.53616
ENSG00000161036	protein coding	basal-specific	0	0	0.353364	1	0.599	0.347245	1.944	0.356481	0.579	0.404145
ENSG00000161057	protein coding	de-novo	1	0	0.568005	0	0.411	0.586375	1.302	0.543011	2.292	0.665794
ENSG00000161204	protein coding	basal-specific	0	0	-0.523814	0	0.113	0.309735	2.13	0.435211	0.307	0.403909
ENSG00000161800	protein coding	pre-existing	1	0	0.425203	0	0.45	0.464444	1.899	0.52712	1.106	0.61302
ENSG00000161813	protein coding	de-novo	1	0	0.153719	0	0.539	0.510204	2.193	0.577747	4.14	0.683575
ENSG00000161847	protein coding	basal-specific	0	0	1.42183	0	0.131	0.29771	2.271	0.322325	1.242	0.429147
ENSG00000162129	protein coding	basal-specific	0	0	-0.96478	5	0.275	0.461818	2.124	0.427966	7.872	0.558308
ENSG00000162402	protein coding	basal-specific	0	0	-2.30658	2	0.251	0.203187	7.863	0.558184	2.686	0.592703
ENSG00000162434	protein coding	pre-existing	1	0	-0.858451	0	0.984	0.528455	3.465	0.521789	7.093	0.545044
ENSG00000162521	protein coding	de-novo	1	0	0.17352	0	0.427	0.407494	1.278	0.552426	6.506	0.596834
ENSG00000162601	protein coding	de-novo	1	0	-3.37129	2	0.038	0.315789	2.487	0.602332	7.29	0.638272
ENSG00000162607	protein coding	de-novo	1	0	-1.96669	1	0.421	0.370546	2.358	0.635284	0.823	0.688943
ENSG00000162613	protein coding	de-novo	1	0	-0.536596	0	0.106	0.5	1.968	0.519817	4.711	0.693483
ENSG00000162642	protein coding	de-novo	1	0	-0.318878	0	0.029	0.310345	0.549	0.473588	2.676	0.640135
ENSG00000162704	protein coding	de-novo	1	0	0.340795	2	0.124	0.354839	0.465	0.490323	6.686	0.616961
ENSG00000162733	protein coding	de-novo	0	1	0.211217	0	0.438	0.513699	2.568	0.497664	7.159	0.6195
ENSG00000162909	protein coding	pre-existing	0	1	-1.30338	0	0.236	0.538136	2.103	0.45126	1.161	0.627046
ENSG00000162980	protein coding	de-novo	1	0	-3.03461	0	0.245	0.22449	0.54	0.616667	4.479	0.67582
ENSG00000163050	protein coding	pre-existing	0	1	#N/A	0	0.148	0.297297	1.944	0.397119	0.807	0.483271
ENSG00000163166	protein coding	pre-existing	0	1	-1.00732	5	0.281	0.327402	2.46	0.534553	0.397	0.61461
ENSG00000163214	protein coding	basal-specific	0	0	-1.14529	1	0.23	0.408696	4.161	0.563086	2.478	0.560936
ENSG00000163376	protein coding	de-novo	1	0	-1.16439	4	0.118	0.5	1.806	0.580842	2.825	0.670088
ENSG00000163399	protein coding	de-novo	0	1	0.279998	0	0.363	0.283747	3.072	0.503581	0.33	0.515152
ENSG00000163428	protein coding	de-novo	1	0	-0.713629	2	0.111	0.243243	1.116	0.453405	6.691	0.654611
ENSG00000163629	protein coding	pre-existing	0	1	-1.40193	2	0.48	0.289583	7.473	0.572327	0.62	0.691935
ENSG00000163714	protein coding	de-novo	1	0	-1.9662	0	0.461	0.436009	3.09	0.60356	4.275	0.672047
ENSG00000163743	protein coding	de-novo	1	0	-0.348078	0	0.166	0.355422	0.786	0.585242	3.505	0.666191
ENSG00000163781	protein coding	de-novo	1	0	-1.45928	0	0.619	0.418417	4.569	0.584154	1.012	0.618577
ENSG00000163798	protein coding	pre-existing	0	1	-0.938457	0	0.489	0.447853	2.229	0.513235	4.352	0.60386
ENSG00000163811	protein coding	de-novo	1	0	-0.954071	2	0.31	0.383871	2.034	0.554572	1.44	0.670139
ENSG00000163930	protein coding	de-novo	0	1	-2.37949	0	0.24	0.470833	2.19	0.415525	1.28	0.426562
ENSG00000163938	protein coding	de-novo	1	0	-1.74573	0	0.278	0.442446	1.65	0.565455	0.251	0.569721
ENSG00000163950	protein coding	de-novo	1	1	0.117333	1	0.131	0.221374	0.834	0.486811	0.866	0.614319
ENSG00000164045	protein coding	de-novo	1	0	-0.544398	2	0.47	0.285106	1.575	0.494603	1.799	0.521957
ENSG00000164062	protein coding	basal-specific	0	0	-0.720124	0	0.128	0.320312	2.214	0.418699	0.793	0.42623
ENSG00000164091	protein coding	de-novo	1	1	-0.140294	3	0.433	0.466513	0.942	0.530786	3.056	0.535668
ENSG00000164093	protein coding	de-novo	0	1	0.77458	1	1.706	0.382181	0.975	0.405128	0.912	0.588816
ENSG00000164109	protein coding	de-novo	1	0	0.0495713	0	0.124	0.403226	0.618	0.567961	4.495	0.628254
ENSG00000164134	protein coding	de-novo	1	0	-0.4629	1	0.332	0.358434	2.601	0.617455	3.3	0.652424
ENSG00000164151	protein coding	de-novo	1	0	#N/A	13	0.239	0.251046	6.801	0.5608	0.89	0.638202
ENSG00000164163	protein coding	de-novo	1	0	-0.277642	0	0.156	0.403846	1.8	0.611111	1.951	0.690928
ENSG00000164164	protein coding	de-novo	1	0	-1.96894	6	0.616	0.279221	3.345	0.547085	3.781	0.655911
ENSG00000164169	protein coding	de-novo	1	0	#N/A	2	0.176	0.465909	2.538	0.571316	2.335	0.604283
ENSG00000164305	protein coding	de-novo	1	1	0.723633	0	0.43	0.402326	0.834	0.609113	2.14	0.618692
ENSG00000164338	protein coding	de-novo	1	0	-0.911497	2	0.652	0.555215	1.638	0.578755	3.286	0.629945
ENSG00000164402	protein coding	de-novo	0	1	-0.247218	1	0.501	0.379242	1.452	0.429752	2.82	0.552482
ENSG00000164465	protein coding	de-novo	0	1	-0.537434	4	0.125	0.2	2.148	0.470205	1.358	0.603093
ENSG00000164466	protein coding	de-novo	1	0	0.304937	0	0.215	0.367442	0.969	0.531476	3.008	0.59641
ENSG00000164576	protein coding	de-novo	0	1	-0.559427	0	0.608	0.205592	0.552	0.458333	5.025	0.570945
ENSG00000164631	protein coding	de-novo	1	0	-1.33989	6	0.566	0.259717	2.094	0.590735	2.415	0.647205
ENSG00000164683	protein coding	de-novo	1	0	-2.25398	2	0.222	0.292793	0.927	0.412082	3.559	0.562237
ENSG00000164715	protein coding	de-novo	1	0	-1.30645	11	0.316	0.268987	4.512	0.470745	4.146	0.517366
ENSG00000164741	protein coding	pre-existing	1	1	0.333468	8	0.494	0.267206	4.587	0.494223	2.45	0.633878
ENSG00000164818	protein coding	basal-specific	0	0	#N/A	0	0.673	0.395245	2.568	0.339564	0.822	0.588808
ENSG00000164828	protein coding	de-novo	1	0	0.282701	2	0.367	0.386921	2.469	0.440664	1.692	0.403664
ENSG00000164880	protein coding	basal-specific	0	0	-0.809238	0	0.108	0.222222	6.573	0.352807	0.3	0.293333
ENSG00000164889	protein coding	basal-specific	0	0	-0.328105	0	1.04	0.443269	3.726	0.369834	1.021	0.405485
ENSG00000164902	protein coding	de-novo	1	0	-0.0867938	4			1.185	0.568776	2.408	0.58887
ENSG00000164904	protein coding	basal-specific	0	0	0.640146	0	0.164	0.286585	1.665	0.508108	3.124	0.573944
ENSG00000164924	protein coding	de-novo	1	0	0.704727	0	0.702	0.317664	0.739	0.566982	4.17	0.618465
ENSG00000164930	protein coding	de-novo	1	0	-0.988525	1	0.317	0.44795	2.121	0.5752	2.333	0.585512
ENSG00000164933	protein coding	de-novo	1	0	-0.694163	2	0.252	0.305556	0.948	0.558017	2.113	0.642215
ENSG00000164944	protein coding	pre-existing	1	0	-1.15132	4	0.082	0.292683	5.439	0.580621	1.026	0.581871
ENSG00000164951	protein coding	de-novo	1	0	-1.1472	6	0.586	0.590444	1.689	0.531676	2.395	0.667223
ENSG00000165156	protein coding	de-novo	1	0	-2.62754	7	0.705	0.429787	2.622	0.59611	1.873	0.689802
ENSG00000165195	protein coding	de-novo	1	0	-1.71519	1	0.456	0.561404	1.455	0.565636	2.967	0.631277
ENSG00000165219	protein coding	pre-existing	1	1	-1.00994	3	0.332	0.388554	4.464	0.546147	4.461	0.603004
ENSG00000165280	protein coding	de-novo	0	1	-0.0303736	1	0.567	0.306878	2.421	0.491532	4.133	0.52722
ENSG00000165304	protein coding	de-novo	1	0	-0.476215	0	0.346	0.514451	1.956	0.5818	1.419	0.584214
ENSG00000165312	protein coding	de-novo	1	0	1.43238	4	0.383	0.21671	1.446	0.316044	1.474	0.680461
ENSG00000165355	protein coding	de-novo	1	0	-0.766774	3	0.398	0.339196	1.668	0.47542	1.832	0.654476
ENSG00000165410	protein coding	de-novo	1	0	1.28486	0	0.334	0.482036	0.501	0.628743	3.752	0.659915
ENSG00000165417	protein coding	de-novo	1	0	0.813095	1	0.441	0.424036	1.131	0.55084	4.771	0.684762
ENSG00000165424	protein coding	de-novo	0	1	0.601451	0	0.184	0.163043	0.726	0.362259	4.02	0.483333
ENSG00000165476	protein coding	de-novo	1	0	0.262334	0	0.145	0.186207	0.768	0.585938	4.259	0.679502
ENSG00000165572	protein coding	pre-existing	1	1	0.0827309	7	0.291	0.38488	2.025	0.477531	2.918	0.650103
ENSG00000165650	protein coding	de-novo	1	0	-2.54076	8	0.213	0.211268	3.465	0.516017	5.994	0.661161
ENSG00000165655	protein coding	pre-existing	1	1	-0.566951	8	0.345	0.208696	1.941	0.29933	0.919	0.614799
ENSG00000165671	protein coding	de-novo	1	1	-2.54728	23	0.504	0.553571	8.091	0.5275	4.754	0.533235
ENSG00000165672	protein coding	de-novo	1	0	1.23331	0	0.022	0.318182	0.771	0.520104	0.76	0.685526
ENSG00000165675	protein coding	de-novo	1	1	-2.07206	0	0.393	0.442748	2.022	0.538081	2.989	0.628304
ENSG00000165688	protein coding	pre-existing	1	1	0.578858	2	0.306	0.480392	1.578	0.442332	1.5	0.408
ENSG00000165732	protein coding	de-novo	1	1	-0.445362	5	0.467	0.417559	2.427	0.549238	2.256	0.655142
ENSG00000165733	protein coding	pre-existing	1	1	-1.08392	4	0.069	0.492754	3.849	0.54014	3.841	0.614684
ENSG00000165757	protein coding	de-novo	1	0	-0.525697	5	0.164	0.25	4.08	0.432843	5.08	0.596457
ENSG00000165801	protein coding	basal-specific	0	0	-0.11078	4	0.124	0.177419	4.56	0.373684	3.287	0.393976
ENSG00000165806	protein coding	de-novo	1	1	0.866931	2	0.384	0.341146	1.167	0.475578	1.483	0.612947
ENSG00000165821	protein coding	basal-specific	0	0	0.856137	4	0.373	0.316354	3.024	0.417659	1.624	0.519089
ENSG00000165832	protein coding	de-novo	1	0	0.222558	0	0.059	0.508475	1.05	0.522857	2.297	0.705268
ENSG00000165934	protein coding	pre-existing	1	0	-0.471318	0	0.473	0.403805	2.349	0.592167	10.401	0.61696
ENSG00000165983	protein coding	de-novo	1	0	0.358954	0	0.246	0.45935	1.05	0.548571	2.489	0.678586
ENSG00000165997	protein coding	de-novo	1	0	0.276084	0	0.207	0.26087	0.54	0.587037	6.423	0.687685
ENSG00000166025	protein coding	pre-existing	0	1	0.10624	6	0.217	0.543779	2.871	0.433647	5.953	0.553502
ENSG00000166164	protein coding	de-novo	0	1	-2.33615	0	0.214	0.140187	1.959	0.553854	3.254	0.59957
ENSG00000166170	protein coding	de-novo	1	0	-0.529411	7	0.414	0.384058	1.344	0.552827	3.276	0.602259
ENSG00000166173	protein coding	de-novo	0	1	-0.0151069	5	0.464	0.469828	1.476	0.417344	2.922	0.553388
ENSG00000166181	protein coding	de-novo	1	0	-0.29464	1	0.245	0.371429	1.575	0.575873	2.074	0.653809
ENSG00000166189	protein coding	pre-existing	0	1	0.315738	11	0.126	0.269841	2.328	0.344502	0.234	0.538462
ENSG00000166197	protein coding	pre-existing	1	1	0.474231	0	0.235	0.378723	2.13	0.471362	3.069	0.54578
ENSG00000166225	protein coding	de-novo	1	0	-1.20043	4	0.539	0.521336	1.527	0.561231	4.838	0.663084
ENSG00000166266	protein coding	de-novo	1	0	-1.51204	1	0.451	0.341463	2.343	0.63551	3.377	0.686408
ENSG00000166272	protein coding	de-novo	0	1	0.478047	10	0.142	0.492958	1.092	0.40293	2.936	0.500681
ENSG00000166348	protein coding	basal-specific	0	0	-1.6266	5	0.805	0.596273	5.055	0.492582	5.66	0.500177
ENSG00000166451	protein coding	de-novo	1	0	-1.61292	0	0.736	0.320652	1.062	0.574388	2.834	0.560692
ENSG00000166477	protein coding	pre-existing	0	1	0.258632	0	0.033	0.363636	2.001	0.565217	0.131	0.816794
ENSG00000166483	protein coding	de-novo	0	1	-0.785634	0	0.755	0.464901	1.941	0.485317	2.274	0.631926
ENSG00000166508	protein coding	pre-existing	0	1	0.10301	1	1.249	0.40032	2.16	0.443519	0.397	0.438287
ENSG00000166598	protein coding	de-novo	1	0	-0.103937	0	0.435	0.466667	2.445	0.586503	2.629	0.600989
ENSG00000166747	protein coding	de-novo	1	0	-0.288606	3	0.91	0.458242	2.478	0.560129	4.058	0.600296
ENSG00000166851	protein coding	basal-specific	0	0	0.984376	0	0.407	0.452088	1.812	0.4266	0.324	0.475309
ENSG00000166887	protein coding	pre-existing	0	1	0.0213963	4	0.151	0.317881	2.661	0.509959	2.053	0.468095
ENSG00000166900	protein coding	de-novo	0	1	-0.0887289	0	0.575	0.526957	0.87	0.527586	5.054	0.571626
ENSG00000166963	protein coding	basal-specific	0	0	-0.14367	7	0.467	0.453961	9.126	0.441595	1.396	0.481375
ENSG00000166986	protein coding	basal-specific	0	0	-0.360409	0	0.686	0.453353	2.703	0.462079	2.531	0.481628
ENSG00000167004	protein coding	de-novo	1	0	0.651037	0	0.645	0.502326	1.539	0.547758	2.061	0.595827
ENSG00000167005	protein coding	de-novo	1	0	0.469449	0	0.172	0.575581	0.684	0.53655	3.579	0.657446
ENSG00000167202	protein coding	de-novo	0	1	-2.04202	2	0.074	0.486486	2.892	0.466113	3.269	0.463139
ENSG00000167447	protein coding	pre-existing	1	1	-0.299092	9	0.264	0.450758	2.976	0.514449	0.486	0.621399
ENSG00000167460	protein coding	de-novo	1	0	0.951569	0	1.079	0.481928	0.855	0.490058	2.413	0.542064
ENSG00000167552	protein coding	basal-specific	0	0	1.42204	0	0.517	0.553191	1.356	0.466814	1.136	0.527289
ENSG00000167635	protein coding	de-novo	1	1	-0.714993	7	1.449	0.518288	0.879	0.577929	1.452	0.659091
ENSG00000167658	protein coding	basal-specific	0	0	-0.199887	3	0.083	0.337349	2.577	0.392317	0.498	0.457831
ENSG00000167670	protein coding	pre-existing	0	1	-1.08531	7	0.123	0.195122	2.871	0.421804	0.83	0.451807
ENSG00000167674	protein coding	basal-specific	0	0	#N/A	0	0.666	0.381381	2.016	0.360119	1.68	0.404762
ENSG00000167699	protein coding	de-novo	1	1	0.235554	0	0.036	0.277778	0.942	0.511677	1.071	0.526611
ENSG00000167721	protein coding	pre-existing	0	1	-0.498432	0	0.23	0.330435	2.415	0.521325	1.8	0.553333
ENSG00000167842	protein coding	de-novo	1	0	-0.292337	3	0.872	0.49656	0.618	0.593851	1.334	0.62069
ENSG00000167881	protein coding	pre-existing	1	0	-0.129176	1	0.239	0.543933	1.884	0.495223	1.77	0.50904
ENSG00000167986	protein coding	pre-existing	0	1	-0.291015	0	1.177	0.497026	3.423	0.480865	3.96	0.487626
ENSG00000168036	protein coding	pre-existing	0	1	-0.661047	1	1.843	0.631036	2.352	0.520408	1.101	0.663034
ENSG00000168078	protein coding	de-novo	1	0	2.05322	0	0.393	0.389313	1.002	0.61976	0.681	0.69163
ENSG00000168092	protein coding	de-novo	1	0	-0.330203	2	0.142	0.267606	0.69	0.528986	3.346	0.616856
ENSG00000168264	protein coding	de-novo	0	1	0.100261	4	0.684	0.154971	1.764	0.324263	2.868	0.642957
ENSG00000168283	protein coding	de-novo	1	0	#N/A	0	0.617	0.329011	0.981	0.590214	1.942	0.68898
ENSG00000168385	protein coding	de-novo	1	0	#N/A	0	0.656	0.371951	1.191	0.526448	2.09	0.625359
ENSG00000168496	protein coding	de-novo	0	1	0.0904172	6	0.281	0.33452	1.143	0.44357	0.734	0.557221
ENSG00000168522	protein coding	de-novo	1	0	0.204014	2	0.888	0.480856	1.14	0.548246	4.433	0.60185
ENSG00000168538	protein coding	basal-specific	0	0	-0.745348	0	0.202	0.316832	3.402	0.572898	1.776	0.581081
ENSG00000168564	protein coding	de-novo	1	0	-0.0324215	1	0.163	0.306748	1.743	0.527252	2.102	0.617031
ENSG00000168610	protein coding	pre-existing	0	1	0.840667	0	0.325	0.421538	2.409	0.485679	3.029	0.509739
ENSG00000168710	protein coding	basal-specific	0	0	0.156119	0	0.8	0.32375	1.593	0.492781	2.062	0.600873
ENSG00000168906	protein coding	de-novo	1	0	-0.151953	0	0.457	0.38512	1.188	0.534512	1.509	0.568588
ENSG00000169016	protein coding	de-novo	1	0	-0.365112	0	0.727	0.429161	0.846	0.550827	2.866	0.592114
ENSG00000169018	protein coding	de-novo	1	0	-1.28299	7	0.673	0.267459	1.884	0.544055	4.62	0.661472
ENSG00000169032	protein coding	pre-existing	0	1	0.349598	1	0.436	0.256881	1.254	0.467305	3.673	0.534713
ENSG00000169139	protein coding	de-novo	1	0	0.621611	0	0.352	0.471591	0.465	0.552688	3.88	0.669588
ENSG00000169258	protein coding	de-novo	1	1	-1.59653	10	0.201	0.208955	3.027	0.374298	1.006	0.400596
ENSG00000169359	protein coding	de-novo	1	0	-0.969428	4	0.459	0.376906	1.65	0.555758	7.186	0.629697
ENSG00000169375	protein coding	pre-existing	0	1	-0.885722	5	0.455	0.353846	3.822	0.512559	3.332	0.631453
ENSG00000169398	protein coding	de-novo	1	0	-1.63854	3	1.942	0.57415	3.291	0.532969	3.9	0.562051
ENSG00000169439	protein coding	de-novo	1	0	2.078	0	0.459	0.342048	0.606	0.528053	2.242	0.64942
ENSG00000169679	protein coding	basal-specific	0	0	-0.874469	0	0.372	0.556452	3.258	0.573051	0.878	0.642369
ENSG00000169710	protein coding	basal-specific	0	0	0.639371	0	0.176	0.221591	7.536	0.347399	0.805	0.367702
ENSG00000169714	protein coding	de-novo	1	0	0.766368	0	0.161	0.322981	0.54	0.485185	2.626	0.582254
ENSG00000169727	protein coding	basal-specific	0	0	0.237143	0	0.365	0.254795	1.584	0.392045	1.717	0.386721
ENSG00000169813	protein coding	de-novo	1	1	0.50013	6	0.487	0.359343	1.248	0.455929	1.02	0.67549
ENSG00000169826	protein coding	de-novo	1	0	-0.680788	2	0.376	0.542553	1.629	0.565991	1.76	0.671591
ENSG00000169905	protein coding	de-novo	1	0	-1.68262	7	0.92	0.521739	1.413	0.503892	6.104	0.627949
ENSG00000169925	protein coding	pre-existing	0	1	1.02415	4	0.539	0.358071	2.181	0.411279	3.285	0.531811
ENSG00000169967	protein coding	de-novo	1	0	-1.39904	0	0.589	0.27674	1.86	0.572043	8.911	0.666592
ENSG00000170004	protein coding	pre-existing	0	1	-2.06256	0	0.541	0.441774	6.345	0.434515	3.552	0.428491
ENSG00000170027	protein coding	de-novo	1	0	0.394518	3	0.183	0.251366	0.744	0.426075	2.778	0.583153
ENSG00000170185	protein coding	de-novo	1	0	-1.64733	7	0.534	0.297753	3.129	0.559604	5.332	0.6491
ENSG00000170191	protein coding	de-novo	1	0	-0.942285	2	0.066	0.242424	0.747	0.552878	2.99	0.634448
ENSG00000170248	protein coding	de-novo	1	0	-0.444279	2	0.158	0.316456	2.622	0.548818	4.992	0.627003
ENSG00000170312	protein coding	de-novo	1	0	0.952074	0	0.201	0.38806	0.894	0.611857	0.877	0.709236
ENSG00000170322	protein coding	basal-specific	0	0	-1.21803	2	0.424	0.608491	3.975	0.453585	1.089	0.527089
ENSG00000170340	protein coding	de-novo	1	0	-0.935294	5	0.25	0.252	1.194	0.536013	1.317	0.694761
ENSG00000170385	protein coding	de-novo	1	0	-0.549916	3	0.549	0.23133	1.524	0.488189	3.82	0.686911
ENSG00000170445	protein coding	basal-specific	0	0	0.0836699	2	0.233	0.390558	1.539	0.466537	2.042	0.427032
ENSG00000170525	protein coding	de-novo	1	1	0.380863	6	0.395	0.268354	1.707	0.413005	2.618	0.482047
ENSG00000170540	protein coding	de-novo	1	1	0.260079	0	0.277	0.31769	0.612	0.550654	1.583	0.632975
ENSG00000170558	protein coding	de-novo	0	1	1.27257	2	0.499	0.436874	2.721	0.535832	1.425	0.54807
ENSG00000170606	protein coding	de-novo	1	0	0.0785691	1	0.238	0.285714	2.523	0.579073	2.013	0.607054
ENSG00000170759	protein coding	de-novo	1	0	-0.121887	0	0.452	0.269912	2.892	0.596819	2.522	0.684377
ENSG00000170776	protein coding	basal-specific	0	0	-2.03444	14	0.396	0.611111	8.454	0.507334	4.681	0.511216
ENSG00000170779	protein coding	de-novo	1	0	0.497422	4	0.091	0.241758	0.726	0.387052	1.631	0.541386
ENSG00000170871	protein coding	de-novo	1	0	-2.90655	4	0.469	0.422175	4.188	0.574737	3.204	0.596442
ENSG00000171004	protein coding	de-novo	0	1	0.0393381	3	0.416	0.519231	1.938	0.421053	2.208	0.673913
ENSG00000171109	protein coding	de-novo	1	0	-0.358163	0	0.171	0.660819	2.226	0.598383	2.877	0.61001
ENSG00000171241	protein coding	pre-existing	0	1	0.0729759	2	0.02	0.45	2.019	0.549282	3.138	0.645953
ENSG00000171316	protein coding	basal-specific	0	0	-2.00401	12	0.55	0.347273	8.994	0.510451	3.609	0.548351
ENSG00000171365	protein coding	de-novo	1	0	-1.37392	1	0.641	0.461778	2.451	0.518564	7.016	0.594926
ENSG00000171456	protein coding	basal-specific	0	0	-1.83315	16	0.926	0.430886	4.626	0.461954	1.981	0.531045
ENSG00000171467	protein coding	basal-specific	0	0	-1.3405	14	0.282	0.195035	6.84	0.504094	1.088	0.627757
ENSG00000171848	protein coding	de-novo	1	0	0.709138	0	0.291	0.209622	1.35	0.488148	2.032	0.625
ENSG00000171867	protein coding	de-novo	1	0	1.66255	5	0.204	0.22549	0.762	0.417323	1.608	0.625
ENSG00000171914	protein coding	basal-specific	0	0	-2.29192	1	0.373	0.426273	7.629	0.446848	4.021	0.51231
ENSG00000171928	protein coding	de-novo	1	0	-2.24108	0	1.416	0.490819	0.618	0.571197	1.147	0.689625
ENSG00000171940	protein coding	pre-existing	0	1	0.841248	5	0.494	0.544534	3.147	0.510327	2.217	0.650429
ENSG00000172046	protein coding	basal-specific	0	0	-1.10501	0	0.337	0.335312	4.266	0.409986	0.62	0.453226
ENSG00000172115	protein coding	de-novo	1	0	-0.0773712	0	0.262	0.362595	0.318	0.556604	5.045	0.591278
ENSG00000172201	protein coding	de-novo	1	1	3.91966	0	0.385	0.324675	0.486	0.269547	3.002	0.67022
ENSG00000172239	protein coding	de-novo	1	1	-0.114454	0	0.472	0.408898	1.44	0.524306	1.109	0.704238
ENSG00000172262	protein coding	de-novo	1	0	-1.73853	5	0.456	0.350877	1.872	0.57265	1.616	0.602723
ENSG00000172379	protein coding	de-novo	1	0	-1.84483	2	0.339	0.551622	2.154	0.45636	4.235	0.484298
ENSG00000172466	protein coding	de-novo	1	0	-0.551704	6	0.34	0.558824	1.107	0.539295	6.833	0.639543
ENSG00000172661	protein coding	de-novo	0	1	-0.851849	0	0.121	0.264463	4.026	0.517139	0.564	0.606383
ENSG00000172795	protein coding	de-novo	1	0	-1.24282	1	0.577	0.480069	1.263	0.589074	8.711	0.639421
ENSG00000172943	protein coding	pre-existing	0	1	-0.3664	0	0.804	0.356965	3.183	0.468426	4.981	0.490263
ENSG00000173334	protein coding	de-novo	1	0	1.65108	5	0.545	0.306422	1.119	0.386059	1.932	0.576087
ENSG00000173473	protein coding	basal-specific	0	0	-1.16844	0	0.096	0.21875	3.318	0.512357	2.94	0.571429
ENSG00000173545	protein coding	de-novo	0	1	0.282769	2	0.135	0.414815	1.434	0.46583	0.138	0.550725
ENSG00000173598	protein coding	de-novo	1	0	1.41318	0	0.44	0.245455	0.546	0.501832	8.767	0.610243
ENSG00000173674	protein coding	de-novo	1	0	0.405611	0	0.198	0.282828	0.435	0.613793	3.781	0.672573
ENSG00000173726	protein coding	de-novo	1	0	-0.454786	0	0.122	0.311475	0.438	0.518265	2.723	0.619537
ENSG00000173744	protein coding	de-novo	1	0	0.411835	0	0.352	0.650568	1.755	0.528775	6.722	0.668105
ENSG00000173757	protein coding	pre-existing	1	1	-0.313991	0	0.555	0.403604	2.364	0.449239	4.935	0.490983
ENSG00000173801	protein coding	basal-specific	0	0	2.26841	0	0.424	0.358491	2.238	0.377569	1.135	0.414978
ENSG00000173821	protein coding	basal-specific	0	0	-1.52362	8	0.159	0.36478	15.771	0.465665	5.296	0.51926
ENSG00000173848	protein coding	de-novo	1	1	-0.415969	2	0.157	0.388535	1.791	0.491346	2.062	0.673133
ENSG00000173852	protein coding	de-novo	1	1	-0.55188	0	0.145	0.317241	2.247	0.561193	5.693	0.626383
ENSG00000173898	protein coding	basal-specific	0	0	-2.19704	3	0.685	0.424818	7.194	0.371977	3.374	0.492294
ENSG00000174010	protein coding	de-novo	1	0	2.40241	5	0.468	0.277778	2.013	0.558867	4.205	0.679667
ENSG00000174013	protein coding	de-novo	1	0	-0.231816	2	0.396	0.381313	0.861	0.428571	4.741	0.623286
ENSG00000174106	protein coding	pre-existing	1	0	-0.271022	5			2.736	0.479167	2.03	0.685222
ENSG00000174173	protein coding	de-novo	1	0	-0.849898	4	0.148	0.385135	1.212	0.631188	0.453	0.626932
ENSG00000174243	protein coding	pre-existing	0	1	-0.823507	3	0.153	0.424837	2.463	0.471782	2.724	0.470631
ENSG00000174371	protein coding	de-novo	1	0	-2.41311	1	0.569	0.507909	2.541	0.576938	0.339	0.687316
ENSG00000174437	protein coding	de-novo	1	0	0.349933	0	0.674	0.209199	3.129	0.513902	5.056	0.563291
ENSG00000174442	protein coding	de-novo	1	0	-0.728189	1	0.67	0.553731	1.776	0.603604	1.806	0.660576
ENSG00000174460	protein coding	de-novo	0	1	0.748046	0	0.473	0.414376	1.209	0.477254	0.515	0.6
ENSG00000174574	protein coding	de-novo	1	0	1.46507	0	0.105	0.247619	0.579	0.447323	2.004	0.5998
ENSG00000174684	protein coding	de-novo	0	1	#N/A	3	0.084	0.27381	1.248	0.375801	0.675	0.54963
ENSG00000174780	protein coding	de-novo	1	0	-0.679162	0			2.016	0.5625	1.82	0.668681
ENSG00000174840	protein coding	de-novo	1	0	-0.0543883	3	0.106	0.349057	1.83	0.453552	6.844	0.631502
ENSG00000175166	protein coding	pre-existing	0	1	-0.127049	1	0.214	0.523364	2.727	0.472681	0.749	0.439252
ENSG00000175175	protein coding	basal-specific	0	0	0.83223	2	0.144	0.340278	2.268	0.477513	4.148	0.64055
ENSG00000175203	protein coding	basal-specific	0	0	0.733489	0	0.358	0.486034	1.221	0.481572	1.244	0.476688
ENSG00000175216	protein coding	pre-existing	0	1	-0.72024	1	0.129	0.403101	6.099	0.555173	0.975	0.573333
ENSG00000175352	protein coding	de-novo	1	0	-0.469485	0	0.257	0.264591	0.759	0.458498	3.412	0.547479
ENSG00000175548	protein coding	de-novo	1	0	0.956325	1	0.132	0.393939	1.422	0.611814	8.508	0.685237
ENSG00000175931	protein coding	pre-existing	0	1	-0.643676	8			3.879	0.399072	1.487	0.462677
ENSG00000175970	protein coding	de-novo	0	1	0.825702	0			0.756	0.441799	3.608	0.518016
ENSG00000176018	protein coding	de-novo	1	0	-0.721411	2	0.209	0.473684	0.921	0.613464	3.201	0.700719
ENSG00000176102	protein coding	de-novo	1	0	-0.093406	0	0.25	0.444	2.25	0.582667	0.614	0.723127
ENSG00000176619	protein coding	pre-existing	0	1	-0.54157	3	0.026	0.346154	1.863	0.336017	2.745	0.425865
ENSG00000176658	protein coding	pre-existing	0	1	-0.0376889	0	0.544	0.568015	3.021	0.54386	2.237	0.430934
ENSG00000176853	protein coding	de-novo	1	0	-1.18159	0	0.264	0.291667	2.517	0.582439	3.936	0.630843
ENSG00000176903	protein coding	de-novo	1	0	0.529068	3	0.745	0.312752	1.062	0.455744	0.795	0.612579
ENSG00000176986	protein coding	basal-specific	0	0	0.451588	1	0.162	0.555556	3.285	0.456317	2.815	0.472824
ENSG00000176994	protein coding	de-novo	1	0	-2.60252	14	0.497	0.396378	2.814	0.471926	4.986	0.486963
ENSG00000177034	protein coding	de-novo	1	0	-0.859709	0	0.12	0.4	0.939	0.552716	6.968	0.644805
ENSG00000177084	protein coding	basal-specific	0	0	-0.780479	2	0.061	0.377049	6.861	0.438712	7.988	0.442414
ENSG00000177125	protein coding	de-novo	1	0	-0.660863	8	0.134	0.529851	1.545	0.478317	4.964	0.609186
ENSG00000177150	protein coding	de-novo	1	0	0.00671022	2	0.503	0.385686	0.819	0.566545	3.133	0.624003
ENSG00000177303	protein coding	basal-specific	0	0	0.796655	2	0.541	0.354898	3.609	0.345525	0.819	0.405372
ENSG00000177383	protein coding	de-novo	0	1	0.400784	4	0.243	0.271605	0.924	0.414502	0.534	0.629213
ENSG00000177485	protein coding	de-novo	1	0	0.292544	2	0.27	0.403704	2.019	0.605745	2.964	0.664305
ENSG00000177606	protein coding	de-novo	0	1	1.09954	10	0.978	0.349693	0.996	0.356426	1.284	0.570093
ENSG00000177613	protein coding	basal-specific	0	0	0.531018	7	0.046	0.434783	1.851	0.458671	2.213	0.659286
ENSG00000177731	protein coding	basal-specific	0	0	-1.72406	0	0.287	0.470383	3.81	0.404199	3.977	0.405331
ENSG00000177853	protein coding	de-novo	1	0	-2.56001	7	0.908	0.512115	4.452	0.63814	2.985	0.677722
ENSG00000177885	protein coding	de-novo	0	1	0.786511	0	0.783	0.384419	0.654	0.492355	2.292	0.504363
ENSG00000178104	protein coding	de-novo	0	1	-0.955291	8	0.657	0.315068	7.452	0.482287	5.033	0.655076
ENSG00000178105	protein coding	basal-specific	0	0	-1.33296	3	0.087	0.356322	2.778	0.568035	4.167	0.610991
ENSG00000178234	protein coding	de-novo	0	1	-2.31111	0	0.437	0.530892	1.827	0.514505	1.591	0.616593
ENSG00000178252	protein coding	basal-specific	0	0	-1.03575	13	0.469	0.409382	3.456	0.413484	3.674	0.422972
ENSG00000178445	protein coding	basal-specific	0	0	-0.660851	0	0.382	0.58377	3.063	0.476983	0.684	0.597953
ENSG00000178502	protein coding	pre-existing	1	0	-0.86384	8	0.053	0.301887	2.127	0.503056	5.222	0.623324
ENSG00000178691	protein coding	de-novo	1	0	-0.582231	1	0.24	0.304167	2.22	0.575225	2.035	0.702703
ENSG00000178695	protein coding	de-novo	1	1	3.48618	11	0.257	0.22179	0.978	0.304703	4.996	0.631705
ENSG00000178764	protein coding	basal-specific	0	0	-0.266515	4	0.574	0.479094	2.514	0.450676	1.273	0.548311
ENSG00000178913	protein coding	de-novo	1	0	0.378086	5	0.74	0.505405	1.05	0.560952	0.505	0.667327
ENSG00000178921	protein coding	basal-specific	0	0	-0.265972	1	0.318	0.484277	4.017	0.385362	3.713	0.387019
ENSG00000178974	protein coding	de-novo	0	1	-1.75188	8	0.36	0.369444	2.136	0.51779	1.57	0.551592
ENSG00000178996	protein coding	de-novo	0	1	0.0332518	6	0.194	0.216495	1.887	0.354001	3.154	0.658846
ENSG00000179115	protein coding	basal-specific	0	0	0.619722	0	0.141	0.489362	1.647	0.386764	0.999	0.398398
ENSG00000179119	protein coding	de-novo	1	0	-0.922672	1	0.085	0.341176	2.058	0.512634	3.458	0.63476
ENSG00000179195	protein coding	de-novo	0	1	-1.67983	2	1.83	0.396721	0.786	0.558524	2.509	0.598246
ENSG00000179222	protein coding	basal-specific	0	0	-1.00461	0	0.252	0.369048	2.505	0.446707	0.217	0.599078
ENSG00000179387	protein coding	de-novo	1	0	0.0331669	0	0.489	0.364008	0.882	0.637188	3.395	0.680707
ENSG00000179409	protein coding	pre-existing	1	1	-0.114852	14	1.342	0.463487	3.177	0.434687	0.595	0.410084
ENSG00000179456	protein coding	de-novo	1	0	-2.21132	11	0.149	0.536913	1.596	0.460526	3.632	0.572412
ENSG00000179918	protein coding	de-novo	1	0	-0.267015	12	0.147	0.482993	1.347	0.423905	0.75	0.604
ENSG00000179981	protein coding	de-novo	1	1	-2.16285	14	1.08	0.326852	3.234	0.414348	1.309	0.640947
ENSG00000180104	protein coding	basal-specific	0	0	-0.320514	3	0.218	0.545872	2.238	0.452636	4.245	0.393875
ENSG00000180398	protein coding	de-novo	0	1	0.7065	1	0.381	0.464567	0.441	0.519274	3.603	0.567027
ENSG00000180447	protein coding	de-novo	1	1	1.10292	8	0.727	0.262724	1.038	0.258189	1.38	0.586232
ENSG00000180530	protein coding	de-novo	1	0	-1.46585	10	0.793	0.464061	3.477	0.57981	3.481	0.677966
ENSG00000180628	protein coding	de-novo	1	0	0.126662	0	0.36	0.513889	0.771	0.614786	6.021	0.679455
ENSG00000180667	protein coding	de-novo	1	0	-2.20401	5	0.205	0.55122	1.047	0.486151	5.171	0.662348
ENSG00000180817	protein coding	de-novo	1	0	0.179143	0	0.107	0.261682	0.87	0.57931	0.32	0.684375
ENSG00000181191	protein coding	pre-existing	0	1	-0.100984	3	0.378	0.455026	1.932	0.464803	0.453	0.655629
ENSG00000181192	protein coding	pre-existing	0	1	-0.708911	1	0.08	0.3375	2.76	0.476087	2.333	0.565366
ENSG00000181222	protein coding	basal-specific	0	0	-0.151249	0	0.399	0.418546	5.913	0.437511
ENSG00000181450	protein coding	de-novo	1	0	-2.80641	2	0.438	0.486301	1.578	0.629911	6.634	0.676515
ENSG00000181467	protein coding	de-novo	0	1	0.404653	6	0.468	0.25	0.552	0.382246	7.382	0.624086
ENSG00000181610	protein coding	de-novo	1	0	0.983264	0	0.331	0.347432	0.573	0.490401	5.002	0.562975
ENSG00000181704	protein coding	de-novo	1	0	0.15848	2	0.505	0.336634	0.711	0.537271	5.283	0.632027
ENSG00000181744	protein coding	de-novo	1	0	-0.605627	3	0.51	0.292157	1.293	0.432328	2.527	0.689751
ENSG00000181789	protein coding	basal-specific	0	0	0.592563	0	0.104	0.336538	2.625	0.463619	0.504	0.486111
ENSG00000182013	protein coding	de-novo	1	0	-7.59246	3	0.306	0.349673	1.32	0.429545	2.058	0.541302
ENSG00000182095	protein coding	basal-specific	0	0	-1.50194	7	0.637	0.287284	8.907	0.315819	1.316	0.449848
ENSG00000182149	protein coding	de-novo	1	1	-0.16567	4	0.701	0.507846	1.14	0.52193	3.386	0.59303
ENSG00000182199	protein coding	basal-specific	0	0	0.720611	0	0.337	0.451039	1.515	0.418482	1.776	0.446509
ENSG00000182220	protein coding	de-novo	1	1	1.25946	0	0.253	0.3083	1.053	0.551757	1.499	0.643763
ENSG00000182307	protein coding	de-novo	0	1	-0.623936	0	0.025	0.28	0.747	0.413655	1.873	0.531767
ENSG00000182473	protein coding	basal-specific	0	0	-0.158868	4	0.316	0.389241	2.208	0.438406	2.632	0.408435
ENSG00000182481	protein coding	de-novo	1	0	0.47042	0	1.102	0.566243	1.59	0.548428	0.649	0.639445
ENSG00000182718	protein coding	basal-specific	0	0	1.92799	0	1.022	0.625245	1.104	0.526268	1.045	0.536842
ENSG00000182827	protein coding	basal-specific	0	0	-0.431112	4	0.066	0.348485	1.587	0.483302	1.931	0.670637
ENSG00000182872	protein coding	basal-specific	0	0	-0.340781	0	0.39	0.335897	2.988	0.391232	0.214	0.471963
ENSG00000183098	protein coding	de-novo	1	0	-0.550814	2	0.65	0.403077	1.668	0.482014	4.803	0.65584
ENSG00000183337	protein coding	pre-existing	0	1	-0.719892	6	0.784	0.264031	5.268	0.460137	1.19	0.637815
ENSG00000183431	protein coding	basal-specific	0	0	0.156301	0	0.057	0.438596	1.506	0.535193	1.211	0.535921
ENSG00000183495	protein coding	basal-specific	0	0	-0.310956	2	0.13	0.292308	9.372	0.410158	2.787	0.571582
ENSG00000183530	protein coding	de-novo	1	0	-1.75012	17	0.191	0.361257	6.456	0.554523	4.18	0.531818
ENSG00000183688	protein coding	de-novo	0	1	#N/A	0			0.435	0.377011	3.186	0.50565
ENSG00000183751	protein coding	basal-specific	0	0	0.291302	0	0.112	0.303571	2.427	0.363	4.244	0.363572
ENSG00000183798	protein coding	de-novo	0	1	0.764229	11	0.184	0.141304	2.301	0.350717	1.306	0.444104
ENSG00000183856	protein coding	basal-specific	0	0	-1.22671	0	0.116	0.327586	4.896	0.435049	1.081	0.506013
ENSG00000184007	protein coding	de-novo	1	0	-2.23852	1	1.12	0.560714	0.504	0.56746	2.431	0.624434
ENSG00000184056	protein coding	basal-specific	0	0	-1.24163	0	0.347	0.360231	1.854	0.485437	1.849	0.492699
ENSG00000184110	protein coding	basal-specific	0	0	0.249175	0	0.301	0.33887	2.742	0.455872	0.214	0.53271
ENSG00000184205	protein coding	basal-specific	0	0	-0.0449708	0	0.132	0.356061	2.082	0.454371	0.601	0.414309
ENSG00000184432	protein coding	pre-existing	0	1	-0.107614	0	0.643	0.488336	2.721	0.562293	6.6	0.590909
ENSG00000184634	protein coding	basal-specific	0	0	0.0954803	0	0.212	0.349057	6.543	0.453462	6.671	0.457802
ENSG00000184640	protein coding	basal-specific	0	0	#N/A	3	0.809	0.425216	1.761	0.385009	1.938	0.400929
ENSG00000184900	protein coding	de-novo	1	0	-0.62379	0	0.161	0.217391	0.444	0.466216	1.334	0.563718
ENSG00000185024	protein coding	de-novo	0	1	-0.148099	4	1.32	0.389394	2.034	0.383972	1.265	0.35336
ENSG00000185049	protein coding	basal-specific	0	0	-0.0245223	1	0.398	0.422111	1.62	0.356173	1.743	0.405049
ENSG00000185567	protein coding	pre-existing	1	0	-1.58496	2	0.244	0.45082	17.388	0.412066	0.81	0.517284
ENSG00000185722	protein coding	pre-existing	0	1	-0.222214	5	0.39	0.474359	3.636	0.452145	3.958	0.550783
ENSG00000185728	protein coding	de-novo	1	0	-0.644379	6	0.509	0.426326	1.767	0.55631	4.743	0.632089
ENSG00000185787	protein coding	de-novo	1	0	-0.296481	0	0.564	0.320922	1.089	0.554637	1.072	0.661381
ENSG00000186310	protein coding	de-novo	1	0	-2.34856	1	0.274	0.324818	1.521	0.554241	0.854	0.696721
ENSG00000186416	protein coding	de-novo	1	0	-0.526876	6	0.729	0.30727	2.352	0.53869	1.015	0.659113
ENSG00000186432	protein coding	de-novo	1	0	-0.266632	0	0.289	0.245675	1.566	0.595785	7.097	0.627307
ENSG00000186480	protein coding	de-novo	1	1	0.178869	0	0.226	0.230088	0.834	0.420863	1.965	0.625445
ENSG00000186566	protein coding	basal-specific	0	0	-0.566673	0	0.036	0.388889	4.509	0.481703	4.547	0.479877
ENSG00000186575	protein coding	de-novo	0	1	-2.28804	2	0.443	0.241535	1.788	0.490492	3.856	0.440093
ENSG00000186871	protein coding	de-novo	1	0	-1.43037	11	0.603	0.500829	3.753	0.592859	0.357	0.680672
ENSG00000187239	protein coding	basal-specific	0	0	0.710023	2	0.219	0.228311	1.938	0.532508	3.352	0.46957
ENSG00000187522	protein coding	de-novo	1	0	-0.519574	5	0.097	0.298969	1.53	0.59085	0.192	0.583333
ENSG00000187535	protein coding	basal-specific	0	0	-1.23976	0	0.499	0.354709	4.389	0.405787	3.341	0.403472
ENSG00000187555	protein coding	pre-existing	0	1	-1.81501	1	0.621	0.132045	3.414	0.563562	4.12	0.578155
ENSG00000187772	protein coding	de-novo	1	0	-0.579275	0	0.283	0.413428	0.777	0.505792	4.549	0.64124
ENSG00000188352	protein coding	pre-existing	1	0	-1.91987	1	0.364	0.483516	5.406	0.546245	0.384	0.59375
ENSG00000188554	protein coding	pre-existing	0	1	-0.386976	0	0.459	0.522876	2.901	0.510169	1.615	0.627864
ENSG00000188612	protein coding	de-novo	1	0	1.598	0	0.29	0.382759	0.288	0.548611	2.753	0.571013
ENSG00000188725	protein coding	de-novo	1	0	-0.653722	2	0.42	0.42619	0.225	0.564444	2.243	0.687472
ENSG00000188895	protein coding	de-novo	1	1	-1.60711	7	0.642	0.227414	1.845	0.424932	2.548	0.607535
ENSG00000188976	protein coding	basal-specific	0	0	0.320864	1			2.25	0.396889	0.491	0.425662
ENSG00000189060	protein coding	pre-existing	1	0	0.507629	4	0.316	0.303797	0.585	0.432479	1.303	0.543361
ENSG00000189091	protein coding	pre-existing	1	1	-0.478459	1	0.538	0.427509	3.654	0.508484	5.855	0.522289
ENSG00000189403	protein coding	de-novo	1	0	0.389818	0	0.941	0.486716	0.648	0.563272	4.653	0.637008
ENSG00000196177	protein coding	de-novo	1	0	1.21514	1	0.252	0.507937	1.299	0.573518	4.525	0.622983
ENSG00000196227	protein coding	de-novo	1	0	-2.71114	5	0.415	0.513253	1.152	0.527778	3.585	0.638215
ENSG00000196235	protein coding	basal-specific	0	0	1.34599	0	0.396	0.368687	3.264	0.417279	0.271	0.494465
ENSG00000196305	protein coding	pre-existing	1	0	-1.50915	1	0.267	0.434457	3.789	0.556611	3.902	0.565607
ENSG00000196323	protein coding	de-novo	1	0	-1.8181	4	0.599	0.263773	1.851	0.544571	7.585	0.655768
ENSG00000196365	protein coding	basal-specific	0	0	-0.189066	4	0.513	0.421053	2.88	0.372569	2.326	0.380482
ENSG00000196367	protein coding	basal-specific	0	0	-0.873284	4	0.335	0.397015	11.622	0.469541	4.207	0.470644
ENSG00000196372	protein coding	de-novo	1	1	-0.537797	6	0.044	0.159091	0.837	0.379928	2.231	0.469296
ENSG00000196396	protein coding	basal-specific	0	0	0.561206	1	0.335	0.397015	1.308	0.493119	2.526	0.528899
ENSG00000196417	protein coding	de-novo	1	0	-0.897719	1	0.138	0.485507	1.572	0.604962	7.311	0.527972
ENSG00000196422	protein coding	de-novo	0	1	-1.56478	12	0.569	0.326889	3.63	0.366942	0.753	0.512616
ENSG00000196453	protein coding	basal-specific	0	0	-0.0102866	3	0.263	0.326996	2.496	0.383413	0.413	0.365617
ENSG00000196455	protein coding	pre-existing	1	1	-0.688641	4	0.558	0.415771	4.077	0.566348	0.381	0.721785
ENSG00000196504	protein coding	de-novo	1	0	-1.08516	0	0.35	0.325714	2.985	0.575879	4.713	0.672396
ENSG00000196526	protein coding	basal-specific	0	0	-0.978716	1	0.273	0.208791	2.445	0.447444	5.051	0.505444
ENSG00000196535	protein coding	basal-specific	0	0	-0.600593	2	0.262	0.29771	6.165	0.407299	6.397	0.413944
ENSG00000196586	protein coding	basal-specific	0	0	0.961622	0	0.343	0.376093	3.885	0.589189	4.525	0.642652
ENSG00000196712	protein coding	basal-specific	0	0	-1.46131	0	0.885	0.566102	8.55	0.570292	7.849	0.623009
ENSG00000196715	protein coding	de-novo	1	0	0.390537	0	0.298	0.174497	0.672	0.379464	5.263	0.596048
ENSG00000196781	protein coding	de-novo	0	1	-0.00978932	2	1.307	0.290742	2.313	0.439689	0.602	0.651163
ENSG00000196850	protein coding	de-novo	1	0	0.666412	0	0.287	0.195122	0.915	0.459016	3.792	0.634757
ENSG00000196865	protein coding	de-novo	1	0	0.0292101	3	0.212	0.429245	2.181	0.57359	8.658	0.652807
ENSG00000196924	protein coding	basal-specific	0	0	0.165301	0	0.245	0.269388	7.944	0.382049	6.87	0.383261
ENSG00000196937	protein coding	de-novo	1	0	0.875175	0	0.334	0.449102	0.684	0.589181	1.583	0.680985
ENSG00000197043	protein coding	pre-existing	0	1	0.289804	0	0.592	0.491554	2.022	0.463403	0.742	0.486523
ENSG00000197081	protein coding	de-novo	0	1	-0.957671	0	0.988	0.598178	7.476	0.476993	12.004	0.51033
ENSG00000197102	protein coding	pre-existing	0	1	-1.95432	5	0.119	0.319328	14.019	0.486126	11.28	0.465869
ENSG00000197157	protein coding	basal-specific	0	0	0.119861	0	0.18	0.338889	2.733	0.458471	0.535	0.474766
ENSG00000197170	protein coding	de-novo	1	0	0.894131	0	0.086	0.290698	1.371	0.595186	2.927	0.645712
ENSG00000197256	protein coding	basal-specific	0	0	1.07276	1	0.568	0.427817	2.58	0.347287	2.288	0.502622
ENSG00000197299	protein coding	de-novo	1	0	-2.54877	3	0.099	0.313131	4.254	0.601316	3.227	0.59498
ENSG00000197386	protein coding	basal-specific	0	0	-1.88992	2	0.878	0.339408	9.429	0.474388	6.53	0.433078
ENSG00000197601	protein coding	de-novo	1	0	-0.218428	0	1.828	0.693654	1.548	0.595607	3.572	0.68953
ENSG00000197694	protein coding	pre-existing	0	1	-1.28011	0	0.142	0.28169	7.497	0.468721	0.328	0.478659
ENSG00000197714	protein coding	de-novo	1	0	-0.468188	9	0.322	0.31677	1.689	0.496744	1.839	0.647635
ENSG00000197746	protein coding	de-novo	0	1	0.866929	0	0.03	0.366667	1.575	0.447619	1.143	0.475941
ENSG00000197771	protein coding	de-novo	1	0	-0.059072	0	0.259	0.204633	1.929	0.551063	2.07	0.635749
ENSG00000197780	protein coding	de-novo	1	0	0.328487	0	0.349	0.501433	0.39	0.548718	2.027	0.590035
ENSG00000197860	protein coding	de-novo	1	0	-0.0151295	0	0.301	0.548173	0.915	0.570492	4.318	0.639185
ENSG00000197879	protein coding	basal-specific	0	0	0.429549	1	0.34	0.341176	3.192	0.406955	1.54	0.437013
ENSG00000198060	protein coding	de-novo	1	0	0.665618	0	0.328	0.256098	0.837	0.572282	2.757	0.667029
ENSG00000198081	protein coding	de-novo	1	0	-0.662004	5	0.464	0.368534	1.35	0.540741	1.839	0.666667
ENSG00000198146	protein coding	de-novo	1	0	-0.344042	1	0.345	0.466667	2.076	0.630539	3.018	0.661696
ENSG00000198160	protein coding	de-novo	1	0	-1.65613	1	0.336	0.357143	1.698	0.593051	3.719	0.695079
ENSG00000198176	protein coding	de-novo	1	0	-0.504846	1	0.316	0.35443	1.233	0.465531	1.206	0.649254
ENSG00000198231	protein coding	pre-existing	0	1	-0.544203	4	0.601	0.399334	2.817	0.515087	1.129	0.542073
ENSG00000198373	protein coding	basal-specific	0	0	-0.326064	1	0.578	0.455017	2.613	0.441638	1.801	0.407551
ENSG00000198408	protein coding	de-novo	1	1	-0.523954	6	0.443	0.322799	2.751	0.554707	2.008	0.61504
ENSG00000198420	protein coding	pre-existing	0	1	#N/A	3	0.352	0.446023	2.766	0.451193	2.758	0.631617
ENSG00000198492	protein coding	de-novo	1	0	-0.0813746	6	0.306	0.385621	1.74	0.517241	0.823	0.650061
ENSG00000198554	protein coding	pre-existing	0	1	-1.46073	1	0.37	0.554054	3.39	0.59233	2.541	0.659189
ENSG00000198561	protein coding	basal-specific	0	0	-0.758819	5	0.589	0.49236	2.907	0.49054	3.238	0.58462
ENSG00000198589	protein coding	basal-specific	0	0	-1.50496	3	1.524	0.436352	8.592	0.5696	3.789	0.562681
ENSG00000198642	protein coding	de-novo	1	0	-0.990255	9	0.545	0.411009	1.854	0.586839	3.341	0.648608
ENSG00000198663	protein coding	de-novo	1	0	-0.0688619	5	0.725	0.525517	1.065	0.505164	5.523	0.525077
ENSG00000198668	protein coding	de-novo	1	0	0.590019	0	0.407	0.402948	0.45	0.582222	3.551	0.58209
ENSG00000198677	protein coding	de-novo	1	0	-1.27521	0	0.491	0.617108	4.737	0.586869	7.773	0.618165
ENSG00000198682	protein coding	basal-specific	0	0	1.44517	0	0.369	0.243902	1.86	0.494086	1.735	0.645533
ENSG00000198700	protein coding	basal-specific	0	0	-1.0332	10	0.053	0.264151	3.126	0.491683	8.237	0.554449
ENSG00000198722	protein coding	pre-existing	1	1	-2.67185	2	1.537	0.450878	13.023	0.562082	3.485	0.487805
ENSG00000198730	protein coding	pre-existing	1	0	-0.32168	2	0.167	0.347305	3.522	0.559057	0.641	0.681747
ENSG00000198752	protein coding	pre-existing	0	1	-1.58496	2	0.376	0.164894	5.136	0.458528	1.332	0.4497
ENSG00000198793	protein coding	basal-specific	0	0	-1.22616	3	0.329	0.264438	7.65	0.468627	5.407	0.488256
ENSG00000198815	protein coding	de-novo	1	0	1.08437	1	0.886	0.639955	1.869	0.538256	3.171	0.601072
ENSG00000198824	protein coding	pre-existing	1	0	1.19434	3	2.834	0.60868	2.439	0.535055	1.041	0.669549
ENSG00000198836	protein coding	de-novo	1	0	-0.879739	0	0.59	0.476271	3.048	0.593176	4.947	0.624419
ENSG00000198841	protein coding	de-novo	1	0	0.844722	5	0.049	0.346939	1.065	0.377465	0.594	0.579125
ENSG00000198862	protein coding	de-novo	1	0	-0.616914	3	0.144	0.381944	5.439	0.603052	2.304	0.695312
ENSG00000198890	protein coding	de-novo	1	0	-0.116956	7	0.042	0.190476	1.128	0.350177	1.773	0.620417
ENSG00000198898	protein coding	de-novo	1	0	0.729762	0	0.221	0.434389	0.861	0.606272	4.182	0.602822
ENSG00000198900	protein coding	pre-existing	0	1	0.444462	1	0.451	0.552106	2.298	0.568755	3.169	0.582203
ENSG00000198901	protein coding	basal-specific	0	0	-1.15331	0	1.212	0.476898	1.863	0.526033	1.091	0.562786
ENSG00000198924	protein coding	de-novo	1	0	-1.44114	3	0.9	0.595556	3.123	0.599424	0.427	0.660422
ENSG00000198954	protein coding	basal-specific	0	0	#N/A	2	0.239	0.531381	1.941	0.525502	2.069	0.607057
ENSG00000198961	protein coding	basal-specific	0	0	0.324669	0	0.22	0.409091	2.127	0.567936	2.518	0.682685
ENSG00000203668	protein coding	de-novo	1	0	-1.94987	9	0.795	0.423899	1.971	0.60071	4.945	0.671183
ENSG00000204120	protein coding	basal-specific	0	0	-0.565267	3	0.49	0.532653	3.966	0.511599	3.745	0.571696
ENSG00000204843	protein coding	pre-existing	0	1	-0.805832	0	0.52	0.511538	3.837	0.431327	1.464	0.423497
ENSG00000205208	protein coding	de-novo	1	0	0.0283818	1	0.091	0.373626	0.342	0.447368	3.069	0.66406
ENSG00000205339	protein coding	de-novo	1	0	-0.400397	0	0.215	0.35814	3.117	0.595765	2.933	0.669622
ENSG00000205609	protein coding	basal-specific	0	0	#N/A	0	0.089	0.280899	2.745	0.455738	0.219	0.538813
ENSG00000205726	protein coding	basal-specific	0	0	-1.18119	0	0.481	0.403326	5.166	0.515099	11.561	0.538967
ENSG00000205978	protein coding	basal-specific	0	0	1.60059	2	0.101	0.237624	5.697	0.406881	1.837	0.468699
ENSG00000211460	protein coding	de-novo	1	0	0.0989055	0	0.47	0.602128	0.687	0.54294	2.646	0.615646
ENSG00000213079	protein coding	basal-specific	0	0	-1.72801	3	0.485	0.25567	4.05	0.537037	0.849	0.69258
ENSG00000213281	protein coding	de-novo	1	0	-0.017908	0	0.131	0.412214	0.57	0.55614	3.625	0.644414
ENSG00000213341	protein coding	de-novo	1	1	-1.73039	0	0.064	0.296875	2.238	0.578195	1.298	0.681818
ENSG00000213390	protein coding	de-novo	0	1	-0.605524	0	0.046	0.391304	1.485	0.540741	4.623	0.568029
ENSG00000213516	protein coding	de-novo	1	0	0.636965	3	0.716	0.414804	1.173	0.518329	3.198	0.637586
ENSG00000213625	protein coding	de-novo	1	0	1.08294	0	0.138	0.217391	0.432	0.543981	4.088	0.616438
ENSG00000213799	protein coding	de-novo	1	0	-1.50606	4	0.219	0.415525	2.913	0.603845	3.318	0.590416
ENSG00000214717	protein coding	de-novo	0	1	-1.29546	0	0.298	0.228188	2.085	0.368345	2.221	0.488519
ENSG00000215251	protein coding	de-novo	1	0	0.0658642	3	0.831	0.498195	2.295	0.546405	0.257	0.653696
ENSG00000215301	protein coding	de-novo	1	0	-0.464938	1	1.882	0.572795	2.202	0.539055	5.928	0.609987
ENSG00000221829	protein coding	basal-specific	0	0	-1.14192	0	0.418	0.315789	1.869	0.429106	1.618	0.459209
ENSG00000224531	protein coding	de-novo	1	0	1.37156	2	0.48	0.235417	0.276	0.474638	4.131	0.654321
ENSG00000225830	protein coding	basal-specific	0	0	-1.00402	8	0.174	0.310345	4.482	0.529005	5.528	0.597685
ENSG00000241973	protein coding	basal-specific	0	0	-0.827882	0	0.313	0.338658	6.309	0.447615	0.356	0.480337
ENSG00000242498	protein coding	de-novo	0	1	#N/A	0	0.832	0.396635	0.681	0.396476	6.789	0.551628
ENSG00000243943	protein coding	basal-specific	0	0	-1.0272	0	0.476	0.468487	1.704	0.519953	1.756	0.592825
ENSG00000244462	protein coding	de-novo	1	0	-0.803061	6	0.248	0.423387	2.799	0.523758	3.599	0.662684
ENSG00000248333	protein coding	basal-specific	0	0	0.287402	0	0.261	0.517241	2.388	0.428811	1.503	0.40652
ENSG00000253719	protein coding	de-novo	0	1	0.506024	9	0.278	0.366906	0.294	0.462585	7.024	0.629413
ENSG00000253729	protein coding	pre-existing	0	1	-0.744866	2	0.326	0.677914	12.387	0.540647	1.062	0.645951
ENSG00000254004	protein coding	de-novo	1	0	0.426397	0	0.844	0.60545	1.239	0.608555	3.313	0.655599
ENSG00000254986	protein coding	basal-specific	0	0	0.239106	0	0.401	0.316708	2.271	0.402466	0.406	0.492611
ENSG00000261236	protein coding	basal-specific	0	0	-0.359651	0	0.068	0.176471	2.241	0.34672	0.119	0.394958
ENSG00000261609	protein coding	de-novo	1	0	-1.6309	1	0.17	0.194118	1.794	0.521182	13.213	0.591539
ENSG00000263001	protein coding	basal-specific	0	0	-1.1833	0	0.356	0.227528	3.48	0.556034	1.162	0.583477
ENSG00000265972	protein coding	de-novo	1	0	-0.492813	0	0.313	0.645367	1.176	0.507653	1.416	0.589689
ENSG00000266412	protein coding	de-novo	1	0	-0.106958	3	0.229	0.528384	1.953	0.53149	1.504	0.638963
ENSG00000273749	protein coding	pre-existing	0	1	0.24981	0	0.302	0.370861	3.762	0.462786	2.976	0.606519
ENSG00000275052	protein coding	de-novo	1	0	#N/A	4	0.337	0.35905	2.55	0.608627	2.619	0.64643
ENSG00000275464	protein coding	basal-specific	0	0	#N/A	0
ENSG00000276043	protein coding	pre-existing	0	1	0.388652	1	0.576	0.475694	2.574	0.368298	1.351	0.586232
ENSG00000277443	protein coding	de-novo	0	1	2.24027	2	0.401	0.496259	0.999	0.255255	2.896	0.67645
ENSG00000278053	protein coding	de-novo	1	0	-0.080135	0	0.026	0.5	1.8	0.584444	4.557	0.609831

## Sheet: D-T0,T1,T3
geneID	geneType	Cluster	CAP-seq				log2TE	m6A site	5'UTR		CDS		3'UTR
			T0	T1	T3	T3 & basal			length (kb)	AU content	length (kb)	AU content	length (kb)	AU content
ENSG00000001084	protein coding	1	1	0	0	0	0.0470902	0	1.273	0.547526	1.92	0.553646	1.415	0.670671
ENSG00000001167	protein coding	3	1	1	1	0	0.329965	6	0.172	0.348837	1.044	0.466475	4.993	0.557981
ENSG00000001497	protein coding	2	1	1	0	0	0.176754	0	0.264	0.42803	2.205	0.457143	4.269	0.483017
ENSG00000003393	protein coding	2	1	1	0	0	-1.58316	2	0.96	0.471875	5.076	0.528172	5.125	0.606439
ENSG00000004700	protein coding	4	0	0	1	0	0.672188	0	0.511	0.473581	1.95	0.611795	1.284	0.706386
ENSG00000004766	protein coding	4	0	0	1	0	#N/A	1	0.246	0.471545	2.895	0.611744	5.28	0.63447
ENSG00000005100	protein coding	2	1	0	0	0	0	3	0.123	0.252033	2.124	0.449623	3.288	0.563564
ENSG00000005156	protein coding	4	0	0	1	1	-0.147637	2	0.33	0.448485	3.03	0.478878	5.237	0.553561
ENSG00000005889	protein coding	3	0	1	0	0	-2.33943	8	0.427	0.4637	2.535	0.552663	4.879	0.645829
ENSG00000006744	protein coding	1	1	0	0	0	-0.828857	3	0.215	0.437209	2.481	0.436921	1.206	0.511609
ENSG00000006831	protein coding	2	0	1	0	0	0.396951	1	0.208	0.375	1.161	0.522825	2.602	0.545734
ENSG00000007168	protein coding	3	1	1	0	0	0.134938	0	0.543	0.384899	1.287	0.560218	4.993	0.600641
ENSG00000007202	protein coding	1	1	0	0	0	-2.99302	5	0.391	0.506394	6.708	0.484049	0.918	0.504357
ENSG00000008256	protein coding	2	1	1	0	0	-0.788024	2	0.137	0.160584	1.203	0.487947	3.168	0.474747
ENSG00000008952	protein coding	3	0	0	1	0	-0.462156	3	0.022	0.227273	1.2	0.589167	5.31	0.646516
ENSG00000009335	protein coding	3	0	1	0	0	-1.38721	1	0.347	0.207493	3.252	0.54182	1.615	0.565944
ENSG00000009954	protein coding	3	1	1	1	1	-1.3333	7	0.36	0.236111	4.452	0.53257	1.303	0.557176
ENSG00000010292	protein coding	1	1	1	0	0	0.02539	0	0.179	0.452514	4.206	0.475749	3.965	0.472383
ENSG00000011007	protein coding	2	0	1	0	0	-0.885238	7	0.056	0.232143	2.319	0.495041	3.155	0.550555
ENSG00000011275	protein coding	2	0	1	0	0	-1.53611	2	0.511	0.520548	2.772	0.509019	2.813	0.420903
ENSG00000011376	protein coding	2	1	1	0	0	-2.34841	5	0.358	0.502793	2.712	0.488569	7.196	0.510561
ENSG00000012048	protein coding	4	0	0	1	0	-1.83099	0	0.647	0.437403	5.655	0.588329	5.375	0.586977
ENSG00000013503	protein coding	4	0	0	1	0	-0.691028	2	0.243	0.485597	3.402	0.560259	0.649	0.619414
ENSG00000015171	protein coding	3	0	1	1	0	-0.595532	0	0.428	0.415888	1.854	0.533981	3.889	0.612497
ENSG00000015676	protein coding	1	0	1	0	0	0.394244	5	0.058	0.327586	1.086	0.440147	6.892	0.459083
ENSG00000016391	protein coding	1	1	0	0	0	-0.46445	5	0.467	0.291221	1.785	0.365826	5.442	0.526277
ENSG00000017797	protein coding	2	0	1	0	0	-1.52729	7	0.492	0.48374	1.968	0.527439	2.87	0.615679
ENSG00000021574	protein coding	3	0	1	1	0	-1.20494	0	0.276	0.264493	1.851	0.52242	3.265	0.674119
ENSG00000023516	protein coding	3	0	1	1	0	-1.27744	3	0.176	0.534091	5.706	0.59972	4.033	0.669725
ENSG00000024048	protein coding	3	0	1	0	0	-0.661368	0	0.291	0.340206	5.268	0.580866	2.332	0.608062
ENSG00000024526	protein coding	3	0	0	1	0	-1.43143	0	0.48	0.564583	2.436	0.629721	2.78	0.68741
ENSG00000025293	protein coding	1	1	1	0	0	-1.97454	3	0.372	0.459677	3.039	0.51234	2.743	0.589865
ENSG00000029363	protein coding	3	0	0	1	0	-1.13906	1	0.253	0.529644	2.763	0.5751	5.358	0.664054
ENSG00000029725	protein coding	2	1	1	0	0	-1.465	7	0.222	0.252252	2.589	0.562766	3.117	0.621431
ENSG00000030066	protein coding	4	1	1	1	1	-1.06595	1	0.135	0.348148	4.311	0.546277	1.652	0.567191
ENSG00000032219	protein coding	3	0	0	1	0	-1.46695	2	0.418	0.287081	3.774	0.614467	1.898	0.692835
ENSG00000033178	protein coding	4	0	0	1	0	-0.564175	3	0.036	0.305556	3.159	0.609687	6.345	0.663042
ENSG00000035403	protein coding	1	1	1	1	1	0.0327479	0	0.094	0.287234	3.405	0.476358	3.194	0.569505
ENSG00000035499	protein coding	1	1	1	1	0	-0.965366	0	0.097	0.247423	1.59	0.564151	1.486	0.569987
ENSG00000035928	protein coding	3	1	1	0	0	-1.09637	2	0.134	0.365672	3.447	0.585437	1.305	0.597701
ENSG00000036257	protein coding	3	0	0	1	0	-0.082619	0	0.606	0.625413	2.307	0.605548	4.095	0.67033
ENSG00000036549	protein coding	3	0	1	1	0	-3.40892	4	0.486	0.50823	2.712	0.588496	3.224	0.657878
ENSG00000037474	protein coding	2	1	1	0	0	-0.102952	3	0.312	0.358974	2.304	0.513455	2.296	0.552265
ENSG00000038427	protein coding	3	0	0	1	0	-0.476951	14	0.41	0.439024	10.191	0.566676	1.869	0.653291
ENSG00000039123	protein coding	3	0	0	1	0	-0.747989	1	0.025	0.56	3.129	0.603707	2.988	0.618809
ENSG00000040633	protein coding	2	1	1	0	0	-0.336267	5	0.534	0.393258	1.212	0.433168	0.597	0.542714
ENSG00000041802	protein coding	2	0	1	0	0	-0.612802	6	0.029	0.344828	1.977	0.524026	1.277	0.518403
ENSG00000044115	protein coding	1	1	1	1	1	0.91468	0	0.614	0.553746	2.721	0.501286	2.535	0.493886
ENSG00000046604	protein coding	4	1	1	1	0	0.0530652	1	0.075	0.16	3.357	0.557641	2.265	0.646799
ENSG00000047188	protein coding	3	0	1	1	0	-0.543945	1	0.202	0.371287	4.293	0.578383	1.81	0.674033
ENSG00000047315	protein coding	4	0	0	1	0	-0.754471	0	0.416	0.480769	3.525	0.584113	0.17	0.752941
ENSG00000047932	protein coding	3	0	1	0	0	#N/A	0	0.254	0.307087	1.389	0.529158	2.985	0.663652
ENSG00000048649	protein coding	3	0	0	1	0	-1.11788	3	1.061	0.716305	4.326	0.565187	6.908	0.65634
ENSG00000049323	protein coding	2	1	1	0	0	-0.360128	0	0.372	0.201613	5.166	0.474061	0.964	0.667012
ENSG00000049449	protein coding	1	1	0	0	0	-0.44679	1	0.435	0.455172	0.996	0.487952	1.25	0.636
ENSG00000054118	protein coding	4	1	1	1	1	-0.589543	7	0.34	0.491176	2.868	0.504533	1.34	0.56194
ENSG00000054267	protein coding	4	0	0	1	0	-1.90371	4	0.5	0.332	3.939	0.606245	1.63	0.685276
ENSG00000055130	protein coding	3	1	1	1	0	-0.6344	4	0.526	0.553232	2.331	0.568855	2.803	0.554049
ENSG00000055917	protein coding	3	0	1	1	0	-1.27281	0	0.442	0.533937	3.195	0.545853	2.894	0.66897
ENSG00000056097	protein coding	3	0	1	1	0	-0.305348	0	0.082	0.329268	3.225	0.539225	1.41	0.687943
ENSG00000058056	protein coding	2	0	1	0	0	0.107098	0	0.194	0.149485	2.592	0.516204	5.26	0.604183
ENSG00000058272	protein coding	3	0	1	1	0	-0.144412	0	0.291	0.560137	3.093	0.580019	2.366	0.679628
ENSG00000059573	protein coding	1	1	0	0	0	-1.14882	0	0.143	0.370629	2.388	0.489112	0.821	0.585871
ENSG00000059758	protein coding	1	0	0	1	0	0.354155	0	0.524	0.272901	1.572	0.589695	1.981	0.683998
ENSG00000060339	protein coding	4	0	0	1	0	-1.10387	0	0.508	0.523622	3.453	0.582682	2.644	0.653177
ENSG00000062194	protein coding	3	0	0	1	0	-2.62692	4	1.566	0.599617	1.482	0.58637	1.927	0.667878
ENSG00000062650	protein coding	3	1	1	1	0	#N/A	6	0.45	0.295556	3.573	0.587462	2.287	0.660254
ENSG00000063601	protein coding	2	1	1	0	0	-0.967316	2	0.303	0.547855	2.022	0.522255	2.379	0.540984
ENSG00000064309	protein coding	2	0	1	0	0	-1.69119	2	0.349	0.26361	3.864	0.520186	5.247	0.554603
ENSG00000064703	protein coding	4	0	0	1	0	-0.408513	5	0.262	0.473282	2.475	0.547879	4.513	0.625969
ENSG00000064726	protein coding	4	0	1	1	0	-1.04353	0	0.101	0.287129	1.449	0.503106	1.644	0.686131
ENSG00000065150	protein coding	3	0	1	1	1	-0.915041	1	0.426	0.539906	3.348	0.565412	2.474	0.63177
ENSG00000065183	protein coding	2	1	1	1	0	-0.849648	1	0.095	0.389474	2.832	0.558969	7.096	0.624577
ENSG00000065243	protein coding	3	0	0	1	0	-0.788671	2	0.359	0.337047	2.955	0.604738	2.807	0.687211
ENSG00000065328	protein coding	1	1	1	1	1	-0.768651	2	0.261	0.509579	2.628	0.517123	1.944	0.63786
ENSG00000065559	protein coding	3	0	1	0	0	-0.73441	2	0.058	0.310345	1.233	0.550689	2.57	0.601946
ENSG00000065613	protein coding	3	0	0	1	0	-0.725978	1	0.606	0.235974	3.708	0.599245	3.513	0.653572
ENSG00000065809	protein coding	2	1	0	0	0	1.02528	2	0.549	0.582878	0.921	0.508143	2.633	0.609571
ENSG00000065911	protein coding	1	1	0	0	0	-0.88694	0	1.286	0.495334	1.053	0.533713	3.895	0.602567
ENSG00000066027	protein coding	2	0	1	0	0	-1.89359	1	0.701	0.248217	1.461	0.586585	1.083	0.616805
ENSG00000066084	protein coding	2	1	1	0	0	-0.653786	0	0.156	0.275641	4.731	0.497781	3.818	0.62153
ENSG00000066135	protein coding	1	1	0	0	0	-0.693314	2	0.178	0.398876	3.195	0.497027	1.148	0.489547
ENSG00000066422	protein coding	4	0	0	1	0	-1.6299	6	1.159	0.559103	3.162	0.565781	4.175	0.632096
ENSG00000066629	protein coding	2	0	1	0	0	0.0032203	0	1.091	0.450962	2.523	0.510107	1.948	0.61807
ENSG00000067064	protein coding	3	0	1	1	0	0.330438	0	0.651	0.385561	0.855	0.556725	2.035	0.646683
ENSG00000067248	protein coding	3	0	0	1	0	-1.39606	2	0.121	0.330579	4.11	0.59781	0.433	0.672055
ENSG00000067334	protein coding	4	0	0	1	0	-2.0002	0	0.058	0.344828	2.271	0.600176	3.567	0.606392
ENSG00000067369	protein coding	3	0	1	1	1	-0.714907	7	0.253	0.44664	5.934	0.518537	4.322	0.584452
ENSG00000067596	protein coding	1	1	1	1	1	-0.665115	3	0.173	0.473988	3.663	0.493311	1.823	0.508502
ENSG00000067704	protein coding	1	1	1	1	1	-2.47688	0	0.085	0.294118	3.039	0.556433	0.406	0.682266
ENSG00000067900	protein coding	3	0	0	1	0	-1.46413	3	0.903	0.314507	4.065	0.623124	4.478	0.629969
ENSG00000068366	protein coding	3	1	1	1	0	0.56246	0	0.393	0.483461	2.136	0.585674	2.694	0.69265
ENSG00000068654	protein coding	2	1	0	0	0	-1.00677	3	0.379	0.538259	5.163	0.463297	7.207	0.494242
ENSG00000068784	protein coding	4	0	0	1	0	-1.55946	4	0.049	0.326531	2.988	0.576975	0.63	0.673016
ENSG00000068796	protein coding	3	0	1	1	0	-0.562672	0	0.506	0.405138	2.235	0.59821	5.456	0.652676
ENSG00000069248	protein coding	4	0	1	0	0	-1.32729	0	0.092	0.391304	3.471	0.557188	1.645	0.58541
ENSG00000069275	protein coding	3	0	1	0	0	-1.53448	3	0.209	0.344498	0.732	0.546448	5.458	0.632283
ENSG00000069956	protein coding	2	0	1	0	0	-1.56374	2	0.964	0.578838	2.166	0.595106	2.375	0.666526
ENSG00000070061	protein coding	2	1	1	1	1	-1.32294	0	0.717	0.403068	4.041	0.539223	6.645	0.583898
ENSG00000070367	protein coding	3	0	0	1	0	-1.23458	0	0.332	0.472892	2.136	0.617509	8.102	0.671933
ENSG00000070814	protein coding	2	1	1	0	0	-0.519534	3	0.118	0.245763	4.47	0.404027	0.647	0.437403
ENSG00000070961	protein coding	3	0	1	1	0	-0.463676	3	0.464	0.469828	3.663	0.599236	3.221	0.662838
ENSG00000071054	protein coding	2	0	1	0	0	-1.38666	2	0.374	0.23262	4.155	0.497954	3.441	0.602151
ENSG00000071537	protein coding	2	1	1	0	0	-0.566385	4	0.109	0.311927	2.385	0.532495	5.425	0.645161
ENSG00000072041	protein coding	3	0	1	0	0	-0.556171	0	0.557	0.579892	2.193	0.596443	3.875	0.667355
ENSG00000072210	protein coding	3	0	1	0	0	-0.727264	0	1.147	0.496077	1.566	0.533206	3.039	0.580125
ENSG00000072274	protein coding	3	0	1	0	0	-1.12638	1	0.731	0.487004	2.388	0.551926	4.6	0.598261
ENSG00000072501	protein coding	2	1	1	0	0	-0.0718952	4	0.34	0.417647	3.702	0.496218	5.954	0.554417
ENSG00000072803	protein coding	2	1	1	1	0	-0.624676	0	0.371	0.285714	1.692	0.54078	2.578	0.598526
ENSG00000073111	protein coding	1	1	0	0	0	-0.130966	2	0.308	0.551948	2.715	0.40884	2.349	0.419753
ENSG00000073578	protein coding	1	1	0	0	0	0.0954474	0	0.053	0.264151	1.995	0.443108	0.662	0.583082
ENSG00000073614	protein coding	2	1	1	0	0	-1.57719	8	0.229	0.419214	5.073	0.533609	5.399	0.617151
ENSG00000075292	protein coding	3	0	0	1	0	-2.29322	9	0.672	0.574405	5.937	0.604682	0.397	0.551637
ENSG00000075711	protein coding	3	0	0	1	0	-1.12023	0	0.474	0.234177	2.781	0.58612	4.068	0.588496
ENSG00000075856	protein coding	1	1	1	0	0	-0.783674	2	0.246	0.52439	2.946	0.474881	2.915	0.50223
ENSG00000075945	protein coding	4	1	1	1	0	0.0326589	0	1.502	0.636485	2.379	0.606137	0.35	0.657143
ENSG00000076003	protein coding	4	1	1	1	0	-0.263374	0	0.078	0.423077	2.466	0.538118	1.209	0.638544
ENSG00000076382	protein coding	1	1	0	0	0	-0.975057	2	0.079	0.443038	3.582	0.497767	0.626	0.485623
ENSG00000077097	protein coding	3	0	1	1	0	-1.87216	0	0.61	0.257377	4.881	0.614218	2.773	0.632528
ENSG00000077147	protein coding	3	0	1	0	0	-0.473511	1	0.177	0.180791	1.77	0.603955	4.153	0.671563
ENSG00000077235	protein coding	1	1	1	1	1	-0.839302	3	0.023	0.304348	6.33	0.438231	0.737	0.415197
ENSG00000077254	protein coding	4	0	0	1	1	-0.772909	0	0.347	0.403458	2.829	0.609756	1.496	0.629679
ENSG00000077684	protein coding	1	1	1	0	0	#N/A	6	0.479	0.551148	2.529	0.482404	2.962	0.645847
ENSG00000078177	protein coding	3	0	0	1	0	-1.79435	2	0.392	0.464286	5.313	0.614719	9.118	0.648826
ENSG00000079246	protein coding	3	0	0	1	0	0.226163	0	0.461	0.388286	2.199	0.574352	1.101	0.595822
ENSG00000079785	protein coding	4	0	0	1	1	-0.475608	0	0.402	0.338308	2.223	0.576698	2.865	0.629319
ENSG00000079819	protein coding	2	1	1	0	0	-0.0494212	0	2.5	0.6276	3.018	0.522531	1.257	0.630867
ENSG00000080819	protein coding	3	1	1	0	0	-0.325085	0	0.144	0.340278	1.365	0.429304	1.237	0.666936
ENSG00000080824	protein coding	4	1	1	1	0	0.482255	1	0.295	0.284746	2.565	0.553606	1.553	0.57888
ENSG00000082258	protein coding	3	0	0	1	0	-1.7153	2	0.62	0.333871	2.193	0.557684	4.694	0.665317
ENSG00000082269	protein coding	3	0	0	1	0	-2.207	2	0.49	0.483673	4.548	0.62489	4.71	0.650743
ENSG00000082516	protein coding	2	1	1	1	0	-0.633935	4	0.078	0.384615	4.527	0.509167	0.799	0.634543
ENSG00000083312	protein coding	3	0	1	1	0	-0.857176	0	0.426	0.28169	2.697	0.583241	8.001	0.661292
ENSG00000083520	protein coding	3	1	1	1	0	-1.17151	0	0.818	0.44621	2.877	0.588113	7.626	0.618935
ENSG00000083642	protein coding	3	0	0	1	0	-0.86151	1	0.161	0.335404	4.344	0.605893	2.967	0.695652
ENSG00000083720	protein coding	4	1	1	1	1	0.875106	0	0.233	0.626609	1.563	0.539987	1.664	0.635817
ENSG00000083896	protein coding	1	0	0	1	0	-0.793087	0	0.477	0.440252	2.208	0.557971	3.712	0.643319
ENSG00000084073	protein coding	3	0	1	0	0	0.443213	1	0.231	0.354978	1.428	0.596639	2.773	0.650559
ENSG00000084090	protein coding	2	1	1	0	0	-1.81431	2	0.393	0.279898	1.113	0.463612	1.871	0.582576
ENSG00000084093	protein coding	3	0	1	0	0	-0.487477	9	0.407	0.464373	3.294	0.544323	6.013	0.624647
ENSG00000084234	protein coding	2	1	1	1	1	-0.096341	1	0.141	0.382979	2.292	0.483421	1.78	0.482022
ENSG00000084652	protein coding	2	1	1	0	0	-0.411222	4	0.281	0.405694	1.641	0.427179	3.09	0.488997
ENSG00000085276	protein coding	3	0	1	1	0	-0.717732	4	1.481	0.634706	3.72	0.543817	1.41	0.652482
ENSG00000085491	protein coding	3	1	1	1	0	-0.439689	2	0.711	0.344585	1.434	0.548815	2.846	0.659522
ENSG00000086061	protein coding	3	0	1	0	0	-0.432447	2	0.121	0.322314	1.194	0.567839	1.004	0.65239
ENSG00000086200	protein coding	4	0	0	1	0	-0.752733	0	0.339	0.377581	3.048	0.608596	1.383	0.616052
ENSG00000086475	protein coding	1	1	1	0	0	-0.164918	2	0.372	0.236559	1.179	0.478372	1.714	0.632439
ENSG00000086758	protein coding	2	1	0	0	0	-1.24551	3	0.594	0.461279	13.125	0.4896	1.213	0.57296
ENSG00000087365	protein coding	1	1	1	1	1	-0.418832	0	0.19	0.336842	2.688	0.438988	0.563	0.513321
ENSG00000088205	protein coding	3	0	1	1	0	-0.886069	0	0.087	0.448276	2.013	0.582216	1.653	0.641863
ENSG00000088812	protein coding	2	1	1	0	0	-0.626405	4	0.09	0.255556	4.29	0.500233	4.271	0.554905
ENSG00000089876	protein coding	1	1	0	0	0	-0.624112	1	0.935	0.614973	2.232	0.5681	0.35	0.642857
ENSG00000090861	protein coding	1	1	0	0	0	-0.138103	2	0.18	0.344444	3	0.466	3.324	0.468111
ENSG00000090863	protein coding	1	1	1	0	0	-0.58229	4	0.379	0.614776	3.612	0.492525	5.727	0.497643
ENSG00000090889	protein coding	1	1	1	1	1	-0.694807	0	0.068	0.397059	3.699	0.53582	0.621	0.565217
ENSG00000090989	protein coding	4	0	0	1	1	-0.800665	0	0.316	0.35443	2.685	0.598883	0.591	0.685279
ENSG00000091136	protein coding	1	1	0	0	0	1.57774	0	0.568	0.434859	5.361	0.505503	5.149	0.51408
ENSG00000091483	protein coding	1	1	0	0	0	-0.387886	0	0.077	0.363636	1.533	0.540117	1.646	0.671932
ENSG00000091527	protein coding	3	0	1	0	0	0.0280438	2	0.359	0.211699	0.777	0.460746	3.086	0.613415
ENSG00000092148	protein coding	3	0	1	1	0	-1.93943	5	0.799	0.276596	7.833	0.575259	7.678	0.587523
ENSG00000092201	protein coding	3	1	1	1	1	-1.07359	1	0.092	0.293478	3.144	0.563613	1.197	0.56391
ENSG00000092820	protein coding	2	1	1	0	0	0.660432	1	0.134	0.380597	1.761	0.458262	1.173	0.557545
ENSG00000092853	protein coding	2	1	1	1	1	-0.756909	6	0.108	0.361111	4.02	0.565423	4.384	0.559991
ENSG00000093000	protein coding	3	0	1	0	0	-0.830498	5	0.561	0.404635	1.407	0.550817	3.362	0.611243
ENSG00000094880	protein coding	1	1	0	0	0	0.234687	0	0.031	0.419355	1.794	0.539576	1.328	0.60994
ENSG00000095002	protein coding	3	0	0	1	0	-0.450197	0	0.139	0.374101	2.817	0.572595	5.045	0.537364
ENSG00000095139	protein coding	3	0	1	0	0	0.249241	1	0.165	0.375758	1.659	0.558168	2.319	0.587753
ENSG00000096384	protein coding	4	0	0	1	0	0.177194	0	0.214	0.406542	2.175	0.524598	0.29	0.558621
ENSG00000096401	protein coding	4	0	0	1	0	-0.598074	0	0.118	0.40678	2.409	0.571191	3.714	0.651589
ENSG00000096717	protein coding	3	0	1	0	0	-0.589032	1	0.432	0.409722	2.244	0.526292	1.797	0.688926
ENSG00000097046	protein coding	4	0	0	1	0	-0.383463	0	0.259	0.393822	1.725	0.591304	1.329	0.674191
ENSG00000099204	protein coding	3	0	1	0	0	0.12648	3	0.65	0.536923	2.505	0.477844	5.148	0.56857
ENSG00000099783	protein coding	1	1	1	1	1	0.589287	3	0.232	0.288793	2.193	0.444596	2.051	0.462701
ENSG00000100029	protein coding	2	1	0	0	0	-0.805796	2	0.992	0.431452	1.767	0.433503	0.421	0.389549
ENSG00000100266	protein coding	1	1	0	0	0	0.3544	2	0.405	0.558025	1.461	0.429843	1.589	0.510384
ENSG00000100345	protein coding	2	1	0	0	0	0.219508	0	0.214	0.303738	5.946	0.409519	1.388	0.466859
ENSG00000100422	protein coding	2	1	1	0	0	-1.17956	1	0.104	0.134615	1.614	0.428748	2.724	0.512115
ENSG00000100503	protein coding	3	0	1	0	0	-3.03976	10	0.281	0.33452	6.402	0.537332	6.752	0.612115
ENSG00000100519	protein coding	4	0	0	1	0	-0.427125	0	0.028	0.464286	1.212	0.584983	0.973	0.693731
ENSG00000100592	protein coding	4	0	0	1	1	-0.959028	1	0.139	0.489209	3.237	0.556688	2.546	0.670463
ENSG00000100603	protein coding	4	0	0	1	1	-0.375882	0	0.102	0.490196	1.716	0.543124	1.742	0.557979
ENSG00000100644	protein coding	4	0	0	1	0	0.683133	0	0.292	0.321918	2.553	0.597728	1.319	0.691433
ENSG00000100697	protein coding	3	0	1	0	0	-2.13213	4	0.444	0.515766	5.769	0.57289	6.674	0.619119
ENSG00000100796	protein coding	4	1	1	1	0	#N/A	0	0.833	0.266507	2.502	0.59952	1.251	0.645883
ENSG00000100811	protein coding	1	1	1	1	0	0.568059	0	0.534	0.217228	1.245	0.416064	5.188	0.55744
ENSG00000100888	protein coding	2	1	1	1	1	-1.70279	8	0.395	0.448101	7.746	0.508521	0.774	0.52584
ENSG00000100934	protein coding	3	0	0	1	1	-0.415245	0	1.203	0.62261	2.298	0.56745	1.32	0.717424
ENSG00000101126	protein coding	2	1	0	1	0	-0.511468	5	1.562	0.639565	3.525	0.560284	2.489	0.611491
ENSG00000101193	protein coding	1	1	0	0	0	0.0416191	4	0.119	0.285714	0.687	0.494905	3.563	0.525119
ENSG00000101310	protein coding	1	1	0	0	0	1.20978	0	0.49	0.395918	2.304	0.519097	0.675	0.693333
ENSG00000101343	protein coding	4	0	0	1	1	-0.642795	0	0.124	0.443548	2.547	0.533962	3.836	0.61001
ENSG00000101346	protein coding	2	0	1	0	0	-0.288444	3	0.062	0.225806	1.167	0.416452	3.997	0.528396
ENSG00000101347	protein coding	3	0	1	0	0	-0.443301	0	0.25	0.332	1.881	0.567251	4.053	0.546015
ENSG00000101350	protein coding	2	0	1	0	0	-2.13139	6	0.18	0.333333	2.244	0.505793	3.692	0.543066
ENSG00000101367	protein coding	2	0	1	0	0	0.219777	0	0.078	0.346154	0.807	0.534077	1.677	0.595707
ENSG00000101413	protein coding	3	0	1	0	0	0.351132	2	0.223	0.278027	0.981	0.505607	2.489	0.578546
ENSG00000101452	protein coding	1	1	0	0	0	-1.15066	0	0.069	0.289855	2.112	0.513731	2.977	0.510245
ENSG00000101493	protein coding	1	1	0	0	0	-0.315946	5	0.37	0.354054	3.492	0.341065	4.816	0.565199
ENSG00000101557	protein coding	3	0	1	1	0	1.46276	0	0.418	0.461722	1.485	0.59798	3.345	0.639462
ENSG00000101596	protein coding	3	0	1	0	0	-0.674463	0	0.395	0.632911	6.018	0.612662	3.691	0.617177
ENSG00000101773	protein coding	4	0	0	1	0	-1.73552	3	0.532	0.552632	2.709	0.606128	0.47	0.582979
ENSG00000101972	protein coding	3	0	0	1	1	-1.00591	0	0.51	0.535294	3.807	0.604676	4.394	0.643605
ENSG00000102024	protein coding	4	0	0	1	0	-0.959318	1	0.226	0.59292	1.893	0.584258	2.641	0.580462
ENSG00000102038	protein coding	4	1	0	0	0	0.22495	0	0.13	0.330769	3.213	0.583256	0.804	0.689055
ENSG00000102178	protein coding	2	1	0	0	0	0.296457	6	0.031	0.16129	0.543	0.38674	1.822	0.444566
ENSG00000102181	protein coding	1	1	0	0	0	-0.0901124	5	0.228	0.210526	0.819	0.446886	4.455	0.487767
ENSG00000102241	protein coding	2	1	1	1	1	-1.61183	1	0.422	0.279621	2.268	0.558201	0.333	0.687688
ENSG00000102531	protein coding	4	0	0	1	0	-0.900329	1	0.348	0.451149	3.597	0.571031	3.743	0.637991
ENSG00000102580	protein coding	3	0	1	0	0	-0.903903	0	0.117	0.273504	1.515	0.591419	3.958	0.614704
ENSG00000102974	protein coding	2	1	1	0	0	-0.972037	6	0.767	0.481095	2.184	0.509158	1.677	0.566488
ENSG00000103126	protein coding	1	1	0	0	0	-1.3072	4	0.436	0.220183	2.589	0.378911	0.682	0.404692
ENSG00000103194	protein coding	2	1	0	0	0	-1.19706	4	0.196	0.397959	2.409	0.505189	2.785	0.540395
ENSG00000103342	protein coding	3	0	1	0	0	-1.15901	1	0.236	0.292373	1.914	0.509404	4.991	0.634743
ENSG00000103540	protein coding	3	0	0	1	0	-2.00497	2	3.607	0.61852	3.039	0.605462	2.16	0.660185
ENSG00000103549	protein coding	1	1	0	0	0	-1.32812	8	0.378	0.293651	3.006	0.401863	2.193	0.382125
ENSG00000103550	protein coding	3	0	1	0	0	-1.32261	6	0.783	0.445722	1.377	0.479303	4.973	0.521215
ENSG00000103591	protein coding	1	1	0	0	0	-0.745124	0	0.516	0.453488	0.948	0.547468	2.154	0.586351
ENSG00000104320	protein coding	4	0	0	1	0	-1.8924	0	0.585	0.529915	2.349	0.621541	6.515	0.64881
ENSG00000104331	protein coding	3	0	1	0	0	-0.742248	2	0.282	0.223404	1.08	0.468519	5.862	0.650972
ENSG00000104332	protein coding	2	0	1	0	0	#N/A	0	0.314	0.203822	0.945	0.406349	3.205	0.557878
ENSG00000104356	protein coding	3	1	1	1	0	-1.11276	3	0.1	0.38	3.075	0.498862	1.564	0.611893
ENSG00000104549	protein coding	3	0	1	0	0	0.0568408	1	0.899	0.419355	1.725	0.561159	0.338	0.707101
ENSG00000104635	protein coding	2	1	1	0	0	0.800204	2	0.418	0.454545	1.479	0.450304	3.038	0.573074
ENSG00000104738	protein coding	1	1	0	0	0	0.202343	1	0.209	0.263158	2.715	0.494659	2.666	0.518005
ENSG00000105186	protein coding	1	1	0	0	0	-0.693709	4	0.842	0.27791	3.153	0.480495	2.002	0.442058
ENSG00000105849	protein coding	3	0	1	1	0	-0.666356	0	0.021	0.428571	1.017	0.53884	2.855	0.664448
ENSG00000105953	protein coding	1	0	0	1	1	0.201372	3	0.156	0.461538	3.117	0.442733	1.067	0.421743
ENSG00000106031	protein coding	3	0	1	0	0	2.86721	0			1.167	0.315338	3.834	0.63928
ENSG00000106052	protein coding	4	0	0	1	0	-0.48771	0	0.465	0.513978	2.442	0.601556	3.591	0.526037
ENSG00000106070	protein coding	1	1	0	0	0	-1.23465	2	0.799	0.314143	1.899	0.461295	4.701	0.51053
ENSG00000106086	protein coding	2	0	1	0	0	-2.82453	0	0.402	0.223881	1.56	0.558974	5.876	0.613342
ENSG00000106263	protein coding	1	1	1	0	0	-0.514896	0	0.614	0.413681	2.445	0.446217	0.556	0.397482
ENSG00000106443	protein coding	3	0	0	1	0	-1.40919	2	0.452	0.396018	2.847	0.579206	7.823	0.691295
ENSG00000106799	protein coding	3	0	1	0	0	-1.0902	0	0.338	0.612426	1.524	0.551837	4.887	0.638633
ENSG00000107164	protein coding	3	1	1	0	0	0.927515	0	0.104	0.182692	1.719	0.452589	4.855	0.563337
ENSG00000107290	protein coding	3	0	0	1	0	-1.63201	8	0.184	0.456522	8.034	0.591486	2.883	0.592438
ENSG00000107581	protein coding	3	1	0	0	0	-0.767164	7	0.147	0.29932	4.149	0.52832	2.369	0.654707
ENSG00000107651	protein coding	2	1	1	1	1	-0.0777823	1	0.053	0.320755	3.003	0.548119	4.092	0.607283
ENSG00000107854	protein coding	3	1	1	1	1	-0.442272	0	0.265	0.222642	3.501	0.558126	2.476	0.662763
ENSG00000107897	protein coding	3	0	1	0	0	0.739968	0	0.571	0.420315	1.605	0.546417	3.595	0.620028
ENSG00000107929	protein coding	2	1	1	0	0	0.271012	1	0.317	0.26183	5.208	0.512865	4.966	0.54853
ENSG00000107937	protein coding	2	1	1	1	0	-0.160888	0	0.336	0.425595	1.905	0.542257	2.705	0.561922
ENSG00000107959	protein coding	1	0	1	0	0	0.0208491	0	0.483	0.436853	3.117	0.491177	4.259	0.50317
ENSG00000108021	protein coding	3	1	1	0	0	-2.21294	17	0.744	0.442204	8.076	0.574294	4.175	0.610539
ENSG00000108055	protein coding	3	1	0	1	1	-0.523231	0	0.122	0.278689	3.654	0.610016	1.746	0.687285
ENSG00000108064	protein coding	3	0	1	1	0	-0.227044	0	0.138	0.391304	0.741	0.59919	4.146	0.655813
ENSG00000108094	protein coding	4	0	0	1	0	1.20136	0	0.49	0.316327	2.295	0.617429	2.608	0.652224
ENSG00000108239	protein coding	1	1	0	1	0	-1.0821	2	0.073	0.328767	2.328	0.457904	3.236	0.655439
ENSG00000108312	protein coding	2	1	1	0	0	-0.804385	2	0.493	0.312373	2.295	0.454031	2.209	0.476686
ENSG00000108389	protein coding	2	1	1	0	0	-1.49733	6	0.231	0.207792	3.63	0.466942	2.134	0.595127
ENSG00000108406	protein coding	4	0	0	1	1	-0.535865	1	0.114	0.377193	2.34	0.580342	1.173	0.647059
ENSG00000108424	protein coding	1	1	1	1	1	-0.087663	0	0.738	0.413279	2.631	0.530977	3.101	0.593679
ENSG00000108468	protein coding	1	1	0	0	0	0.532676	0	0.481	0.349272	0.558	0.521505	1.383	0.585683
ENSG00000108582	protein coding	2	1	1	1	0	0.0609448	1	0.402	0.599502	4.143	0.528602	5.175	0.651014
ENSG00000108588	protein coding	1	1	0	1	0	-0.307711	0	0.495	0.539394	1.452	0.566804	1.626	0.649446
ENSG00000108599	protein coding	1	1	0	0	0	-1.93524	2	0.149	0.322148	1.989	0.552036	1.925	0.61974
ENSG00000108651	protein coding	1	1	1	0	0	-0.537512	0	0.081	0.395062	1.794	0.56243	2.455	0.584929
ENSG00000108654	protein coding	4	0	0	1	0	-0.592316	0	0.951	0.391167	1.845	0.564228	3.124	0.613956
ENSG00000108861	protein coding	2	1	1	0	0	1.03049	3	0.053	0.169811	0.558	0.413978	3.484	0.522101
ENSG00000108883	protein coding	1	1	0	1	1	-0.226955	1	0.398	0.449749	2.919	0.482014	1.326	0.4819
ENSG00000108946	protein coding	4	1	1	1	1	0.731562	0	0.579	0.609672	1.146	0.528796	4.101	0.647891
ENSG00000109111	protein coding	1	1	0	0	0	-0.446867	1	0.355	0.574648	5.181	0.473847	1.054	0.441176
ENSG00000109320	protein coding	1	1	1	0	0	-1.28179	0	0.512	0.257812	2.934	0.511929	3.136	0.521365
ENSG00000109466	protein coding	2	0	1	0	0	-2.28758	0	0.316	0.205696	1.794	0.554627	2.612	0.611792
ENSG00000109472	protein coding	1	1	0	0	0	0.995884	0	0.214	0.275701	1.431	0.481481	0.937	0.700107
ENSG00000109685	protein coding	2	1	0	0	0	-2.10229	8	0.518	0.411197	4.098	0.47511	7.624	0.550367
ENSG00000109805	protein coding	4	0	0	1	1	-0.679637	0	0.099	0.323232	3.048	0.606299	2.262	0.615827
ENSG00000110048	protein coding	4	0	0	1	1	-0.111653	4	0.11	0.245455	2.424	0.476898	2.179	0.575034
ENSG00000110075	protein coding	3	1	1	1	0	-1.09262	0	0.513	0.504873	2.64	0.558333	2.217	0.609382
ENSG00000110218	protein coding	2	1	1	0	0	-0.331621	4	0.472	0.254237	1.281	0.512881	1.099	0.603276
ENSG00000110367	protein coding	3	0	0	1	0	-0.258644	3	0.361	0.578947	1.452	0.564738	4.342	0.614003
ENSG00000110429	protein coding	3	0	0	1	0	-0.183592	0	3.752	0.563699	1.416	0.555791	6.156	0.645224
ENSG00000110435	protein coding	2	1	1	0	0	-0.13978	0	0.377	0.291777	1.506	0.522576	0.956	0.709205
ENSG00000110880	protein coding	1	1	1	0	0	1.33161	1	0.412	0.473301	1.584	0.508207	2.294	0.57367
ENSG00000110917	protein coding	2	0	1	0	0	-0.432227	2	0.148	0.263514	0.879	0.437998	5.314	0.523899
ENSG00000111142	protein coding	4	0	0	1	0	0.189892	1	0.66	0.44697	1.437	0.580376	1.935	0.646512
ENSG00000111145	protein coding	3	0	1	0	0	0.820021	0	0.423	0.472813	1.224	0.435458	2.644	0.656581
ENSG00000111530	protein coding	3	0	1	1	0	-0.159786	3	0.364	0.32967	3.693	0.600867	7.123	0.62586
ENSG00000111581	protein coding	4	0	0	1	1	-0.225015	0	0.568	0.512324	2.778	0.583153	3.347	0.620556
ENSG00000111602	protein coding	1	1	1	0	0	-0.417516	2	0.178	0.337079	3.627	0.466501	1.353	0.539542
ENSG00000111642	protein coding	2	1	1	1	1	-0.650786	0	0.62	0.262903	5.823	0.487378	1.991	0.50226
ENSG00000111880	protein coding	3	0	0	1	0	-0.473846	2	0.209	0.368421	1.794	0.57971	2.822	0.650602
ENSG00000112062	protein coding	2	1	1	0	0	0.417605	0	0.481	0.286902	1.083	0.534626	2.789	0.580495
ENSG00000112078	protein coding	2	0	1	0	0	-1.03119	5	0.552	0.387681	1.26	0.546032	3.968	0.568548
ENSG00000112118	protein coding	1	1	0	0	0	0.000804402	2	0.232	0.439655	2.562	0.467994	0.574	0.545296
ENSG00000112159	protein coding	2	1	0	0	0	-2.109	1	0.187	0.299465	16.791	0.517896	1.507	0.572661
ENSG00000112249	protein coding	3	0	1	1	0	-1.3904	2	0.353	0.371105	6.609	0.595854	3.118	0.605837
ENSG00000112339	protein coding	2	1	0	0	0	-1.31367	0	0.405	0.520988	2.055	0.577129	4.901	0.647419
ENSG00000112531	protein coding	3	0	1	1	0	0.350955	0	1.194	0.204355	1.026	0.520468	7.882	0.654529
ENSG00000112739	protein coding	3	0	0	1	0	-1.40191	2	0.159	0.383648	3.024	0.594577	4.367	0.662698
ENSG00000112972	protein coding	3	0	1	1	0	1.12342	2	0.213	0.361502	1.563	0.575176	3.661	0.631795
ENSG00000112983	protein coding	1	1	0	0	0	-0.923274	3	0.339	0.507375	3.708	0.5089	2.713	0.51714
ENSG00000113013	protein coding	1	1	1	1	0	0.193036	0	0.365	0.561644	2.04	0.536765	4.572	0.586833
ENSG00000113141	protein coding	1	1	0	0	0	0.1495	0	0.248	0.467742	1.674	0.511947	0.238	0.508403
ENSG00000113161	protein coding	3	0	0	1	0	-0.288658	0	0.451	0.379157	2.667	0.56093	6.875	0.588509
ENSG00000113194	protein coding	1	1	0	0	0	0.28585	6	0.539	0.400742	1.338	0.510463	3.124	0.555378
ENSG00000113368	protein coding	2	1	1	1	1	0.353659	0	0.886	0.31377	1.761	0.492902	1.599	0.606004
ENSG00000113407	protein coding	4	0	0	1	1	-0.236296	0	0.604	0.531457	2.271	0.561867	2.187	0.585734
ENSG00000113441	protein coding	3	0	1	0	0	-0.129013	1	0.349	0.541547	3.078	0.582521	8.98	0.641759
ENSG00000113569	protein coding	3	0	0	1	1	0.0148917	0	0.14	0.507143	4.176	0.576389	3.763	0.596067
ENSG00000113615	protein coding	3	0	0	1	0	0.672493	0	0.292	0.349315	3.282	0.55454	2.815	0.70444
ENSG00000113638	protein coding	4	0	0	1	0	-0.0183785	1	0.141	0.432624	0.789	0.562738	4.569	0.680455
ENSG00000113645	protein coding	2	1	0	0	0	-1.90056	0	0.508	0.208661	3.36	0.426786	3.286	0.523737
ENSG00000114019	protein coding	1	0	0	1	1	0.90172	0	0.436	0.417431	2.514	0.361973	2.358	0.522901
ENSG00000114030	protein coding	3	0	1	0	0	-0.289441	1	0.188	0.292553	1.617	0.553494	5.083	0.628172
ENSG00000114062	protein coding	4	0	0	1	0	-1.31054	0	1.163	0.436801	2.628	0.607686	6.353	0.642059
ENSG00000114346	protein coding	3	0	0	1	0	-0.72746	0	0.518	0.474903	2.745	0.615301	1.371	0.689278
ENSG00000114520	protein coding	3	0	0	1	0	-0.308171	0	0.03	0.266667	1.353	0.558019	1.149	0.590949
ENSG00000114867	protein coding	2	1	0	0	0	-0.406154	4	0.496	0.3125	4.821	0.437876	4.684	0.444278
ENSG00000115020	protein coding	3	0	1	0	0	-1.24077	0	0.17	0.282353	6.297	0.553756	3.441	0.66347
ENSG00000115053	protein coding	2	1	0	0	0	-0.0406769	1	0.51	0.343137	2.205	0.534694	1.66	0.546386
ENSG00000115091	protein coding	3	0	0	1	0	0.115894	0	0.314	0.356688	1.257	0.579952	5.141	0.678078
ENSG00000115159	protein coding	4	0	0	1	0	-0.218768	0	0.545	0.563303	2.184	0.550366	3.485	0.654519
ENSG00000115183	protein coding	2	1	0	0	0	-0.859205	3	0.268	0.380597	5.586	0.471536	1.647	0.681239
ENSG00000115241	protein coding	1	1	0	0	0	-0.445341	3	0.169	0.218935	1.641	0.468617	0.4	0.46
ENSG00000115306	protein coding	2	1	1	0	0	-2.37858	5	0.385	0.405195	7.101	0.464442	2.877	0.597497
ENSG00000115368	protein coding	3	0	0	1	0	-0.768208	0	0.047	0.425532	2.493	0.60369	3.992	0.627505
ENSG00000115421	protein coding	3	0	0	1	0	-0.511422	0	0.211	0.459716	2.211	0.599276	4.926	0.633577
ENSG00000115484	protein coding	4	0	0	1	0	-0.272394	0	0.164	0.347561	1.62	0.558642	0.607	0.657331
ENSG00000115524	protein coding	4	1	1	1	1	-0.753436	0	0.08	0.425	3.915	0.569604	8.77	0.605701
ENSG00000115762	protein coding	2	1	1	0	0	0.635611	0	0.795	0.508176	0.93	0.421505	3.101	0.55853
ENSG00000115816	protein coding	4	0	0	1	0	-1.66967	5	0.088	0.306818	3.165	0.606003	0.152	0.743421
ENSG00000115839	protein coding	1	1	0	0	0	-1.06101	2			3.075	0.554797	4.945	0.566026
ENSG00000115970	protein coding	3	0	1	0	0	-1.4064	3	0.352	0.451705	5.862	0.556465	4.874	0.544727
ENSG00000116062	protein coding	2	1	1	1	0	-1.15871	0	0.68	0.479412	4.089	0.550501	3.523	0.575362
ENSG00000116266	protein coding	4	0	0	1	0	-0.245975	0	0.064	0.375	1.779	0.618325	0.646	0.739938
ENSG00000116406	protein coding	3	0	1	0	0	-2.20088	2	0.389	0.300771	2.874	0.576896	3.826	0.66597
ENSG00000116514	protein coding	1	1	0	0	0	-0.493774	3	0.124	0.185484	2.199	0.416553	0.834	0.535971
ENSG00000116560	protein coding	3	0	0	1	0	-0.243737	0	0.334	0.467066	2.187	0.427069	1.52	0.634868
ENSG00000116711	protein coding	4	0	0	1	0	-2.56322	0	0.156	0.589744	2.25	0.591111	0.473	0.704017
ENSG00000116729	protein coding	1	1	0	0	0	0.844137	1	0.388	0.476804	1.632	0.521446	0.866	0.590069
ENSG00000116747	protein coding	3	0	0	1	0	-0.452804	1	0.568	0.482394	1.617	0.606061	6.488	0.680949
ENSG00000116918	protein coding	3	0	0	1	0	-0.436595	0	0.27	0.32963	0.873	0.60252	1.619	0.679432
ENSG00000116984	protein coding	3	1	1	1	1	-2.20034	0	0.545	0.368807	3.798	0.528436	6.337	0.577087
ENSG00000117000	protein coding	3	0	0	1	0	-1.6742	5	0.013	0.230769	5.745	0.60087	0.474	0.628692
ENSG00000117036	protein coding	2	1	1	1	1	0.579573	4	0.172	0.313953	1.539	0.452242	3.65	0.590685
ENSG00000117139	protein coding	1	1	1	1	1	-0.407458	2	0.642	0.431464	4.743	0.519502	4.763	0.585975
ENSG00000117153	protein coding	1	1	0	0	0	-1.42132	0	0.191	0.319372	1.707	0.514353	1.521	0.589086
ENSG00000117155	protein coding	3	0	1	1	0	-0.21901	0	0.353	0.25779	1.845	0.615176	3.727	0.671586
ENSG00000117569	protein coding	3	0	0	1	0	-0.145898	0	0.248	0.53629	1.623	0.585336	10.333	0.66515
ENSG00000117899	protein coding	2	0	1	0	0	-0.949031	3	0.037	0.297297	0.705	0.483688	3.467	0.540813
ENSG00000117906	protein coding	2	1	1	1	0	-0.512984	0	0.104	0.192308	1.008	0.556548	5.171	0.612841
ENSG00000118007	protein coding	3	0	1	1	0	-2.95704	0	0.97	0.524742	3.777	0.583267	4.633	0.598316
ENSG00000118193	protein coding	3	0	0	1	1	-2.01972	2	0.456	0.41886	4.947	0.618557	1.891	0.661555
ENSG00000118200	protein coding	3	0	1	1	0	-2.83957	5	0.935	0.291979	4.47	0.589038	2.645	0.694896
ENSG00000118276	protein coding	3	0	1	0	0	-0.440573	1	0.155	0.335484	1.149	0.580505	3.368	0.695962
ENSG00000118689	protein coding	1	1	0	0	0	-0.134971	2	0.304	0.210526	2.022	0.390702	4.982	0.576676
ENSG00000118855	protein coding	2	1	0	0	0	-1.83289	0	0.529	0.499055	1.545	0.525566	1.906	0.602833
ENSG00000118873	protein coding	3	0	0	1	1	-1.25357	0	0.299	0.454849	4.257	0.560489	2.958	0.669033
ENSG00000119138	protein coding	1	1	1	0	0	1.3797	7	1.294	0.393354	0.735	0.394558	3.172	0.629571
ENSG00000119139	protein coding	2	1	1	0	0	0.255202	3	1.081	0.622572	3.75	0.4664	2.283	0.542707
ENSG00000119280	protein coding	2	1	1	0	0	0.319654	1	0.601	0.332779	0.984	0.360772	2.733	0.541164
ENSG00000119285	protein coding	3	0	1	1	0	-2.18126	0	0.127	0.472441	6.435	0.578244	1.897	0.614128
ENSG00000119396	protein coding	1	1	0	1	0	0.854224	0	0.238	0.298319	0.648	0.572531	3.263	0.641434
ENSG00000119541	protein coding	4	0	0	1	0	0.294399	0	0.217	0.364055	1.335	0.568539	1.785	0.664426
ENSG00000119638	protein coding	1	1	0	0	0	-1.21651	2	0.486	0.343621	2.976	0.492944	5.211	0.558818
ENSG00000119906	protein coding	3	0	1	1	0	#N/A	2	0.148	0.331081	3.561	0.588318	4.732	0.625106
ENSG00000119912	protein coding	3	0	0	1	0	-0.609671	0	0.537	0.575419	3.06	0.580392	5.279	0.61451
ENSG00000119927	protein coding	2	1	1	0	0	-1.35289	1	0.2	0.47	2.487	0.550462	3.685	0.622252
ENSG00000119969	protein coding	3	0	0	1	0	-0.687281	0	0.596	0.431208	2.655	0.617702	4.054	0.628515
ENSG00000120438	protein coding	4	0	0	1	0	-0.849364	0	0.614	0.472313	1.671	0.579892	0.604	0.587748
ENSG00000120539	protein coding	4	0	0	1	0	-0.37963	1	0.603	0.396352	2.64	0.587879	1.417	0.600565
ENSG00000120690	protein coding	3	0	0	1	0	0.894043	2	0.831	0.421179	1.86	0.553763	3	0.622333
ENSG00000120705	protein coding	4	0	0	1	0	-0.103483	2	0.449	0.314031	1.314	0.589041	2.21	0.593213
ENSG00000120733	protein coding	2	1	1	0	0	-0.892222	7	0.117	0.495726	5.286	0.481271	5.499	0.512821
ENSG00000120800	protein coding	3	0	1	1	0	-1.67734	0	0.178	0.365169	8.358	0.581838	0.495	0.565657
ENSG00000120802	protein coding	3	0	0	1	0	0.619523	0	0.278	0.320144	2.085	0.541487	2.493	0.651424
ENSG00000120948	protein coding	2	0	1	0	0	0.537944	3	0.194	0.484536	1.245	0.529317	2.838	0.632488
ENSG00000121005	protein coding	1	1	0	1	0	-0.331286	0	0.562	0.576512	1.503	0.560878	2.316	0.694732
ENSG00000121039	protein coding	1	1	1	0	0	-2.02323	0	0.688	0.223837	1.026	0.469786	2.245	0.63118
ENSG00000121057	protein coding	2	1	1	1	1	-1.91219	7	0.555	0.345946	2.712	0.438053	2.055	0.52944
ENSG00000121060	protein coding	2	1	1	0	0	1.61085	2	0.092	0.326087	1.893	0.421553	3.791	0.525983
ENSG00000121152	protein coding	1	1	0	0	0	-0.337671	1	0.295	0.528814	2.226	0.51168	3.74	0.557219
ENSG00000121274	protein coding	3	0	1	0	0	-0.559796	1	0.316	0.164557	2.142	0.492997	6.323	0.651906
ENSG00000121390	protein coding	1	1	0	0	0	-0.691217	0	0.188	0.510638	1.572	0.482188	0.675	0.702222
ENSG00000121481	protein coding	4	0	0	1	0	-0.636457	0	0.202	0.405941	1.011	0.582591	2.302	0.679844
ENSG00000121486	protein coding	4	0	0	1	1	-0.426265	0	0.241	0.394191	2.202	0.569936	1.918	0.694473
ENSG00000121644	protein coding	2	0	1	0	0	-0.967966	2	0.211	0.208531	0.585	0.555556	3.244	0.625154
ENSG00000121749	protein coding	4	0	0	1	0	0.573504	0	0.503	0.554672	2.076	0.606936	4.044	0.654303
ENSG00000121774	protein coding	1	1	1	1	1	0.70102	0	0.128	0.28125	1.332	0.430931	1.253	0.660016
ENSG00000121864	protein coding	2	0	1	0	0	-1.32697	4	0.579	0.385147	1.458	0.624829	4.161	0.600817
ENSG00000121892	protein coding	3	0	1	1	0	-0.655722	1	0.54	0.225926	4.014	0.589686	2.622	0.657895
ENSG00000122299	protein coding	3	0	1	0	0	-2.14562	0	1.404	0.618234	2.916	0.593278	1.254	0.61882
ENSG00000122376	protein coding	3	0	1	0	0	-1.95543	0	0.689	0.301887	2.715	0.61768	0.782	0.654731
ENSG00000122482	protein coding	3	0	0	1	0	-2.11992	2	0.322	0.338509	3.984	0.61998	1.5	0.706
ENSG00000122591	protein coding	2	0	1	0	0	-0.979621	1	0.808	0.550743	1.566	0.586207	11.378	0.632712
ENSG00000122642	protein coding	1	1	0	0	0	-0.284583	1	0.17	0.211765	1.872	0.471688	1.579	0.529449
ENSG00000122779	protein coding	4	0	0	1	1	0.162042	2	0.29	0.268966	3.153	0.532826	5.045	0.620416
ENSG00000122786	protein coding	3	0	1	1	1	1.04956	1	0.459	0.496732	2.382	0.513854	2.399	0.657357
ENSG00000122882	protein coding	3	0	1	0	0	0.976396	0	0.247	0.396761	2.034	0.551131	1.087	0.571297
ENSG00000122958	protein coding	4	0	0	1	0	1.11766	0	0.653	0.336907	0.984	0.638211	3.143	0.611199
ENSG00000123064	protein coding	1	1	1	0	0	-0.264897	1	0.155	0.496774	2.649	0.364288	1.704	0.443075
ENSG00000123104	protein coding	3	0	1	0	0	-0.800122	2	0.413	0.292978	8.106	0.570072	4.045	0.629419
ENSG00000123200	protein coding	3	0	0	1	1	-0.547656	7	0.352	0.380682	5.01	0.548503	2.662	0.676935
ENSG00000123684	protein coding	3	0	1	0	0	-2.00699	0	0.816	0.457108	1.113	0.58221	6.442	0.631481
ENSG00000124160	protein coding	3	0	1	0	0	-0.0808383	4	0.413	0.37046	1.74	0.453448	1.309	0.539343
ENSG00000124198	protein coding	2	1	1	0	0	-1.60722	0	0.179	0.189944	5.358	0.520157	8.508	0.569229
ENSG00000124209	protein coding	3	0	1	0	0	-0.107277	2	0.262	0.20229	0.585	0.560684	7.804	0.615582
ENSG00000124383	protein coding	3	0	1	1	0	-0.773013	1	0.867	0.476355	2.046	0.608016	1.765	0.626062
ENSG00000124422	protein coding	1	1	1	1	1	-0.957006	2	0.233	0.446352	1.578	0.439163	3.435	0.495197
ENSG00000124459	protein coding	2	0	1	0	0	-0.989695	5	1.114	0.475763	2.049	0.531967	0.763	0.63827
ENSG00000124486	protein coding	3	0	1	1	1	-1.5713	0	0.823	0.351154	7.713	0.587709	4.055	0.64143
ENSG00000124535	protein coding	1	1	0	0	0	-0.644873	0	0.248	0.560484	1.998	0.384384	1.67	0.57006
ENSG00000124766	protein coding	2	1	0	0	0	2.31259	13	0.784	0.438776	1.425	0.295439	2.66	0.581579
ENSG00000125107	protein coding	2	1	1	0	0	-1.65405	0	0.46	0.484783	7.131	0.54831	1.098	0.52459
ENSG00000125266	protein coding	2	1	1	0	0	2.14548	5	0.698	0.204871	1.002	0.518962	3.295	0.556297
ENSG00000125304	protein coding	2	0	1	0	0	-0.0430253	0	1.29	0.470543	1.992	0.573795	1.29	0.677519
ENSG00000125482	protein coding	3	0	1	1	0	-0.923312	5	0.24	0.504167	2.718	0.561074	0.367	0.59673
ENSG00000125484	protein coding	2	0	1	0	0	-0.5533	9	0.564	0.322695	2.469	0.491697	6.008	0.603862
ENSG00000125630	protein coding	3	0	1	0	0	-1.52562	6	0.765	0.380392	3.522	0.528961	4.089	0.601859
ENSG00000125676	protein coding	3	0	0	1	0	-1.6654	0	0.079	0.658228	4.782	0.608323	3.198	0.629143
ENSG00000125733	protein coding	1	1	0	0	0	-0.0970674	0	0.646	0.464396	1.806	0.419712	0.942	0.43949
ENSG00000125817	protein coding	2	1	1	0	0	-1.80141	9	0.257	0.0972763	1.8	0.350556	0.833	0.37455
ENSG00000126216	protein coding	1	1	0	0	0	-0.626983	0	0.225	0.235556	2.724	0.51395	2.047	0.576942
ENSG00000126261	protein coding	4	1	1	1	0	1.55926	0	0.498	0.495984	1.923	0.557462	2.03	0.575369
ENSG00000126945	protein coding	2	1	1	0	0	-0.208987	3	0.151	0.509934	1.35	0.522963	0.795	0.677987
ENSG00000127022	protein coding	3	0	1	0	0	-0.981777	0	0.805	0.43354	1.881	0.549708	5.045	0.616056
ENSG00000127603	protein coding	2	1	0	0	0	-2.96795	9	1.092	0.558608	22.779	0.533913	5.539	0.58043
ENSG00000127804	protein coding	2	0	1	0	0	-0.903181	5	0.131	0.412214	1.689	0.525163	3.921	0.527416
ENSG00000127955	protein coding	1	1	0	0	0	1.00637	0	0.958	0.502088	1.065	0.575587	8.688	0.650322
ENSG00000128595	protein coding	2	1	0	0	0	0.324472	5	0.943	0.556734	0.972	0.545267	4.233	0.611387
ENSG00000128641	protein coding	4	0	0	1	1	-0.0729958	0	0.399	0.586466	3.411	0.564644	1.429	0.681596
ENSG00000128714	protein coding	2	0	1	0	0	0.433076	0	0.17	0.247059	1.032	0.36531	1.214	0.611203
ENSG00000129083	protein coding	3	0	0	1	0	-0.435943	0	0.317	0.391167	2.862	0.598882	0.318	0.720126
ENSG00000129116	protein coding	3	0	1	0	0	0.635897	0	0.522	0.431034	3.372	0.502372	2.277	0.642951
ENSG00000129245	protein coding	1	1	1	0	0	0.0365058	0	0.365	0.191781	2.022	0.437685	0.6	0.431667
ENSG00000129292	protein coding	3	0	1	1	0	-2.45399	0	0.362	0.604972	3.054	0.574656	3.112	0.627571
ENSG00000129315	protein coding	2	0	1	0	0	0.301637	5	0.323	0.430341	2.181	0.534159	6.037	0.604936
ENSG00000129351	protein coding	2	1	1	0	0	-0.0116161	9	0.354	0.443503	2.697	0.415647	3.088	0.455635
ENSG00000130024	protein coding	3	0	1	0	0	-1.0349	1	0.569	0.147627	1.497	0.544422	3.187	0.669281
ENSG00000130340	protein coding	1	1	0	0	0	-0.566347	0	0.363	0.460055	1.899	0.513428	3.396	0.536808
ENSG00000130396	protein coding	3	1	0	1	1	-1.35283	5	0.319	0.319749	5.673	0.49339	2.088	0.644636
ENSG00000130559	protein coding	1	1	0	0	0	-1.42275	7	0.387	0.165375	4.842	0.435151	2.822	0.5691
ENSG00000130749	protein coding	1	1	0	0	0	-0.461441	9	0.062	0.387097	3.912	0.353783	2.169	0.474412
ENSG00000130816	protein coding	1	1	1	1	1	-0.205329	0	0.506	0.537549	4.977	0.437412	4.91	0.44888
ENSG00000130826	protein coding	2	1	1	0	0	-0.920843	0	1.73	0.593642	1.545	0.520388	2.316	0.548359
ENSG00000130935	protein coding	3	0	0	1	0	-0.226995	0			2.16	0.600926	1.935	0.613437
ENSG00000131013	protein coding	4	1	0	1	0	-0.101544	0	0.534	0.664794	1.479	0.608519	0.958	0.696242
ENSG00000131016	protein coding	1	1	1	1	1	-1.05161	13	0.272	0.341912	5.349	0.488129	2.845	0.648506
ENSG00000131018	protein coding	1	1	0	0	0	-0.343639	2	1.004	0.464143	26.394	0.532659	4.917	0.570877
ENSG00000131242	protein coding	1	1	0	0	0	-1.5818	1	0.243	0.222222	1.914	0.404911	6.479	0.476925
[truncated: 503 more rows]

## Sheet: E-Column definition
A: TE & m6A sites
[truncated: 44 more rows]
