# Supplementary material for: Profiling stress-triggered RNA condensation with photocatalytic proximity labeling
Source: Research Square preprint supplement (doi:10.21203/rs.3.rs-2513504/v1), 2023-02-14
Supplement: Supplementary file 4 [file e8374cb61057497f221b15ad.xlsx]

## Sheet: A-arsenite
arsenite					G3BP1 vs. untargeted				post- vs. pre- enrichment				label vs. omit probe
geneName	geneID	geneType	SG-proximal?	SG-excluded?	log2FC	padj	enriched?	depleted?	log2FC	padj	enriched?	depleted?	log2FC	padj	enriched?
TSPAN6	ENSG00000000003	protein_coding	0	0	-0.32501	0.0650839	0	0	0.957326	1.93578e-05	1	0	0.976543	9.9886e-05	1
TNMD	ENSG00000000005	protein_coding	0	0	1.17365	NA	0	0	1.38251	NA	0	0	-0.089747	NA	0
DPM1	ENSG00000000419	protein_coding	0	0	-0.0480021	0.919264	0	0	0.00629824	0.993118	0	0	0.83904	0.0685618	0
SCYL3	ENSG00000000457	protein_coding	0	0	-0.119563	0.812941	0	0	-0.15284	0.825709	0	0	-0.100698	0.886273	0
C1orf112	ENSG00000000460	protein_coding	0	0	-0.509125	0.0765816	0	0	-0.263023	0.607905	0	0	-0.234106	0.685659	0
FGR	ENSG00000000938	protein_coding	0	0	NA	NA	0	0	NA	NA	0	0	NA	NA	0
CFH	ENSG00000000971	protein_coding	0	0	0.340692	NA	0	0	0.588662	NA	0	0	0.421613	NA	0
FUCA2	ENSG00000001036	protein_coding	0	0	0.160644	0.539505	0	0	0.485089	0.0910591	0	0	0.546248	0.0763521	0
GCLC	ENSG00000001084	protein_coding	1	0	0.600324	0.00472495	1	0	1.27372	6.41679e-06	1	0	1.26612	9.73428e-05	1
NFYA	ENSG00000001167	protein_coding	1	0	0.514199	0.0230634	1	0	0.906814	0.000861227	1	0	1.33051	4.4637e-05	1
STPG1	ENSG00000001460	protein_coding	0	0	-0.365374	0.547344	0	0	-0.530744	0.491889	0	0	-0.789601	0.235871	0
NIPAL3	ENSG00000001461	protein_coding	0	0	0.191963	0.596148	0	0	0.258011	0.599333	0	0	0.121752	0.816591	0
LAS1L	ENSG00000001497	protein_coding	1	0	0.437396	0.00394241	1	0	0.657716	0.000683746	1	0	0.584997	0.00678978	1
ENPP4	ENSG00000001561	protein_coding	0	0	-0.299973	0.358713	0	0	0.857536	0.061951	0	0	1.77637	0.000699713	1
SEMA3F	ENSG00000001617	protein_coding	0	0	0.226179	0.70335	0	0	-0.344962	0.628817	0	0	-0.608859	0.315592	0
CFTR	ENSG00000001626	protein_coding	0	0	-2.03784	NA	0	0	0.587413	NA	0	0	-2.39724	NA	0
ANKIB1	ENSG00000001629	protein_coding	0	0	-0.21955	0.456452	0	0	0.0281601	0.960699	0	0	0.327269	0.414136	0
CYP51A1	ENSG00000001630	protein_coding	0	0	0.878728	0.10802	0	0	0.090964	0.923222	0	0	-0.681479	0.271882	0
KRIT1	ENSG00000001631	protein_coding	0	0	-0.22878	0.43186	0	0	0.356794	0.384746	0	0	0.633338	0.12609	0
RAD52	ENSG00000002016	protein_coding	0	0	-0.0519411	0.92609	0	0	0.0263154	0.974092	0	0	-0.0988321	0.885246	0
MYH16	ENSG00000002079	unitary_pseudogene	0	0	-0.968275	NA	0	0	-1.07674	NA	0	0	-1.83191	0.208291	0
BAD	ENSG00000002330	protein_coding	0	0	-0.271512	0.766981	0	0	-0.411972	0.712641	0	0	-0.142507	0.914169	0
LAP3	ENSG00000002549	protein_coding	0	0	0.211552	0.320258	0	0	0.566102	0.0222207	1	0	0.671655	0.0148367	1
CD99	ENSG00000002586	protein_coding	0	0	0.00771789	0.980402	0	0	-0.0562141	0.880906	0	0	-0.388567	0.112359	0
HS3ST1	ENSG00000002587	protein_coding	0	0	NA	NA	0	0	NA	NA	0	0	NA	NA	0
AOC1	ENSG00000002726	protein_coding	0	0	-1.82281	NA	0	0	NA	NA	0	0	NA	NA	0
WNT16	ENSG00000002745	protein_coding	0	0	0.890257	NA	0	0	-0.208178	NA	0	0	-0.968834	NA	0
HECW1	ENSG00000002746	protein_coding	0	0	1.64646	NA	0	0	0.745192	NA	0	0	0.180622	0.938129	0
MAD1L1	ENSG00000002822	protein_coding	0	0	0.384082	0.203582	0	0	-0.128809	0.777539	0	0	-0.10554	0.833204	0
LASP1	ENSG00000002834	protein_coding	0	0	0.461672	0.0673557	0	0	0.104596	0.806882	0	0	-0.499088	0.0783895	0
SNX11	ENSG00000002919	protein_coding	0	0	0.39553	0.322533	0	0	0.0537634	0.945002	0	0	-0.250136	0.645662	0
TMEM176A	ENSG00000002933	protein_coding	0	0	-2.58235	NA	0	0	-2.24617	NA	0	0	-2.39584	NA	0
M6PR	ENSG00000003056	protein_coding	0	0	0.00608424	0.987377	0	0	0.285144	0.461224	0	0	-0.251606	0.493114	0
KLHL13	ENSG00000003096	protein_coding	0	0	0.102374	0.794352	0	0	1.14612	0.00453989	1	0	1.63696	0.000279111	1
CYP26B1	ENSG00000003137	protein_coding	0	0	0.273806	0.674244	0	0	0.134108	0.896776	0	0	0.248982	0.782383	0
ICA1	ENSG00000003147	protein_coding	0	0	0.324388	0.721224	0	0	-0.45947	0.654955	0	0	0.119907	0.930184	0
DBNDD1	ENSG00000003249	protein_coding	0	0	0.0253997	0.964268	0	0	-0.540793	0.180291	0	0	-0.496936	0.248418	0
ALS2	ENSG00000003393	protein_coding	1	0	0.448612	0.0276661	1	0	1.18871	2.38888e-06	1	0	1.32285	2.25679e-06	1
CASP10	ENSG00000003400	protein_coding	0	0	0.772976	0.323042	0	0	0.884581	0.414133	0	0	-0.204056	0.854718	0
CFLAR	ENSG00000003402	protein_coding	0	0	-0.021226	0.970056	0	0	-0.177524	0.779103	0	0	-0.312913	0.568624	0
TFPI	ENSG00000003436	protein_coding	0	0	-0.207896	0.765951	0	0	0.898824	0.346503	0	0	0.431272	0.666585	0
NDUFAF7	ENSG00000003509	protein_coding	0	0	-0.293545	0.483341	0	0	0.187631	0.806272	0	0	0.36221	0.577063	0
RBM5	ENSG00000003756	protein_coding	0	0	-0.00311672	0.992847	0	0	0.237307	0.471409	0	0	0.321098	0.310787	0
MTMR7	ENSG00000003987	protein_coding	0	0	-0.733579	0.420582	0	0	-0.892766	0.44534	0	0	-0.0198733	0.991623	0
SLC7A2	ENSG00000003989	protein_coding	0	0	0.00195941	0.995325	0	0	0.939289	7.11127e-05	1	0	0.907849	0.00125561	1
ARF5	ENSG00000004059	protein_coding	0	0	0.142992	0.604674	0	0	0.136142	0.721993	0	0	-0.268496	0.453338	0
SARM1	ENSG00000004139	protein_coding	0	0	0.0631865	0.916122	0	0	-0.599669	0.221941	0	0	-0.962881	0.0156086	0
POLDIP2	ENSG00000004142	protein_coding	0	0	0.38631	0.0196619	1	0	0.0725049	0.811464	0	0	-0.499424	0.00994433	0
PLXND1	ENSG00000004399	protein_coding	0	0	-0.314124	0.361058	0	0	-0.588671	0.12704	0	0	-0.411236	0.390608	0
AK2	ENSG00000004455	protein_coding	0	0	-0.189817	0.174974	0	0	0.0569565	0.841706	0	0	0.123614	0.654083	0
CD38	ENSG00000004468	protein_coding	0	0	1.3427	NA	0	0	1.58662	NA	0	0	1.41952	NA	0
FKBP4	ENSG00000004478	protein_coding	0	0	0.148398	0.338468	0	0	0.349964	0.0472155	1	0	0.228414	0.282101	0
KDM1A	ENSG00000004487	protein_coding	0	0	0.0758122	0.639658	0	0	0.915185	2.25533e-10	1	0	0.216245	0.344117	0
RBM6	ENSG00000004534	protein_coding	0	0	-0.0385534	0.914067	0	0	-0.0564362	0.905299	0	0	0.329373	0.36774	0
CAMKK1	ENSG00000004660	protein_coding	0	0	0.601463	0.027291	1	0	0.51348	0.195103	0	0	0.55267	0.176013	0
RECQL	ENSG00000004700	protein_coding	0	0	0.478178	0.0609856	0	0	1.41698	1.46947e-07	1	0	1.81304	2.30764e-09	1
VPS50	ENSG00000004766	protein_coding	0	0	-0.0893822	0.804377	0	0	0.976711	0.019633	1	0	1.42092	0.000377902	1
HSPB6	ENSG00000004776	protein_coding	0	0	1.44058	NA	0	0	-0.274576	NA	0	0	-1.22808	NA	0
ARHGAP33	ENSG00000004777	protein_coding	0	0	0.354928	0.678348	0	0	-0.303753	0.778372	0	0	-0.814576	0.284052	0
NDUFAB1	ENSG00000004779	protein_coding	0	0	0.2631	0.315171	0	0	0.148714	0.711736	0	0	0.845145	0.0081592	1
PDK4	ENSG00000004799	protein_coding	0	0	-0.028451	0.985877	0	0	0.000895425	0.999623	0	0	1.18099	0.470919	0
SLC22A16	ENSG00000004809	protein_coding	0	0	NA	NA	0	0	NA	NA	0	0	NA	NA	0
ZMYND10	ENSG00000004838	protein_coding	0	0	-0.881078	NA	0	0	-1.34765	NA	0	0	-1.55025	NA	0
ABCB5	ENSG00000004846	protein_coding	0	0	-1.57499	NA	0	0	-0.971754	NA	0	0	0.420332	NA	0
ARX	ENSG00000004848	protein_coding	0	0	-0.380621	NA	0	0	-3.89958	NA	0	0	-4.27251	NA	0
SLC25A13	ENSG00000004864	protein_coding	0	0	0.0328048	0.914297	0	0	0.344911	0.223074	0	0	0.844215	0.00198267	1
ST7	ENSG00000004866	protein_coding	0	0	-0.112562	0.862067	0	0	-0.131157	0.8815	0	0	-0.0236032	0.979927	0
CDC27	ENSG00000004897	protein_coding	0	0	-0.190562	0.235911	0	0	0.326366	0.0990948	0	0	0.82535	5.53564e-05	1
SLC4A1	ENSG00000004939	protein_coding	0	0	NA	NA	0	0	NA	NA	0	0	NA	NA	0
CALCR	ENSG00000004948	protein_coding	0	0	0.3761	NA	0	0	1.05453	NA	0	0	1.03778	NA	0
HCCS	ENSG00000004961	protein_coding	0	0	-0.284464	0.421984	0	0	-0.068426	0.922911	0	0	-0.307659	0.540881	0
DVL2	ENSG00000004975	protein_coding	0	0	0.598374	0.000129175	1	0	0.334994	0.0992641	0	0	0.0708287	0.820762	0
PRSS22	ENSG00000005001	protein_coding	0	0	NA	NA	0	0	NA	NA	0	0	NA	NA	0
UPF1	ENSG00000005007	protein_coding	0	0	0.688533	4.13191e-07	1	0	0.339805	0.0772139	0	0	0.570936	0.00581801	1
SKAP2	ENSG00000005020	protein_coding	0	0	-0.107865	0.743736	0	0	1.08367	0.000964413	1	0	1.76975	7.07473e-07	1
SLC25A5	ENSG00000005022	protein_coding	0	0	-0.265126	0.015605	0	0	0.0613934	0.762733	0	0	0.0120245	0.963133	0
MCUB	ENSG00000005059	protein_coding	0	0	-0.47322	0.197952	0	0	-0.0151101	0.985958	0	0	0.414712	0.530341	0
HOXA11	ENSG00000005073	protein_coding	0	0	0.777556	0.0372032	1	0	0.683352	0.204026	0	0	1.17348	0.029461	1
POLR2J	ENSG00000005075	protein_coding	0	0	0.177508	0.742593	0	0	-1.19305	0.0011413	0	1	-0.935632	0.0322281	0
DHX33	ENSG00000005100	protein_coding	1	0	0.619346	4.23053e-05	1	0	0.524408	0.014947	1	0	0.714244	0.00134507	1
MEOX1	ENSG00000005102	protein_coding	0	0	-0.64297	NA	0	0	-0.538036	NA	0	0	0.292912	NA	0
THSD7A	ENSG00000005108	protein_coding	0	0	-0.295647	NA	0	0	0.253814	NA	0	0	0.215202	NA	0
LIG3	ENSG00000005156	protein_coding	0	0	0.467822	0.00785732	1	0	0.547946	0.0237727	1	0	0.396238	0.146439	0
RPAP3	ENSG00000005175	protein_coding	0	0	-0.305784	0.174974	0	0	0.578696	0.105539	0	0	1.12689	0.000606568	1
ACSM3	ENSG00000005187	protein_coding	0	0	-0.364046	NA	0	0	-0.947115	NA	0	0	0.382741	NA	0
AC004381.6	ENSG00000005189	protein_coding	0	0	-0.0287422	0.96525	0	0	-0.0937983	0.908565	0	0	0.301106	0.662443	0
CIAPIN1	ENSG00000005194	protein_coding	0	0	-0.112441	0.721224	0	0	-0.196278	0.608982	0	0	0.312379	0.42293	0
SPPL2B	ENSG00000005206	protein_coding	0	0	0.30944	0.49431	0	0	-0.621464	0.12826	0	0	-0.721607	0.0729141	0
FAM214B	ENSG00000005238	protein_coding	0	0	-0.114464	0.941325	0	0	-0.764794	0.590355	0	0	-0.481129	0.762495	0
COPZ2	ENSG00000005243	protein_coding	0	0	0.295859	NA	0	0	-0.469864	NA	0	0	-1.2238	NA	0
PRKAR2B	ENSG00000005249	protein_coding	0	0	-0.0310853	0.948676	0	0	0.515312	0.265943	0	0	1.35085	0.00211006	1
MSL3	ENSG00000005302	protein_coding	0	0	-0.00283332	0.995841	0	0	0.109492	0.86563	0	0	0.32535	0.532426	0
CREBBP	ENSG00000005339	protein_coding	0	0	0.387817	0.0475222	1	0	-0.133218	0.627124	0	0	-0.0635554	0.844232	0
TSPOAP1	ENSG00000005379	protein_coding	0	0	0.342383	NA	0	0	0.587413	NA	0	0	0.420332	NA	0
MPO	ENSG00000005381	protein_coding	0	0	NA	NA	0	0	NA	NA	0	0	NA	NA	0
PON1	ENSG00000005421	protein_coding	0	0	-1.6676	NA	0	0	-1.39863	NA	0	0	-2.13256	NA	0
GCFC2	ENSG00000005436	protein_coding	0	0	-0.506827	0.0109473	0	1	0.338199	0.376137	0	0	1.08332	0.00266984	1
WDR54	ENSG00000005448	protein_coding	0	0	-0.156353	0.675113	0	0	-0.154788	0.75953	0	0	-0.389587	0.339154	0
CROT	ENSG00000005469	protein_coding	0	0	-0.205867	0.731694	0	0	0.583182	0.487568	0	0	0.572358	0.494796	0
ABCB4	ENSG00000005471	protein_coding	0	0	0.0500084	NA	0	0	-0.189244	NA	0	0	0.646585	0.761109	0
KMT2E	ENSG00000005483	protein_coding	0	0	-0.106945	0.707728	0	0	-0.106517	0.799863	0	0	0.278952	0.449662	0
RHBDD2	ENSG00000005486	protein_coding	0	0	-0.0154033	0.973887	0	0	-0.346318	0.35506	0	0	-1.34934	2.53116e-08	0
SOX8	ENSG00000005513	protein_coding	0	0	0.886034	0.0849816	0	0	0.320447	0.671578	0	0	0.145911	0.861678	0
IBTK	ENSG00000005700	protein_coding	0	0	0.859436	0.309238	0	0	3.01796	0.00671101	1	0	1.90358	0.0688541	0
ZNF195	ENSG00000005801	protein_coding	0	0	0.143148	0.710222	0	0	0.168512	0.750442	0	0	0.389793	0.45171	0
MYCBP2	ENSG00000005810	protein_coding	0	0	0.155661	0.377288	0	0	0.390813	0.0145651	1	0	0.650736	7.53576e-05	1
FBXL3	ENSG00000005812	protein_coding	0	0	-0.0743149	0.794771	0	0	1.00808	5.40879e-06	1	0	1.55023	1.47315e-08	1
ITGAL	ENSG00000005844	protein_coding	0	0	-1.09648	NA	0	0	2.1731	NA	0	0	-1.64856	NA	0
PDK2	ENSG00000005882	protein_coding	0	0	0.23252	0.657604	0	0	-0.202213	0.752816	0	0	-0.270192	0.641007	0
ITGA3	ENSG00000005884	protein_coding	0	0	0.390451	0.533598	0	0	0.0608117	0.959681	0	0	0.225429	0.807956	0
ZFX	ENSG00000005889	protein_coding	0	0	-0.0764083	0.724304	0	0	0.762401	0.000567204	1	0	1.27712	1.0291e-07	1
LAMP2	ENSG00000005893	protein_coding	0	0	-0.558046	0.00044471	0	1	0.623159	0.00371658	1	0	0.917603	0.000133897	1
ITGA2B	ENSG00000005961	protein_coding	0	0	-0.649686	0.315733	0	0	-0.904192	0.286057	0	0	-1.22225	0.130976	0
ASB4	ENSG00000005981	protein_coding	0	0	NA	NA	0	0	NA	NA	0	0	NA	NA	0
GDE1	ENSG00000006007	protein_coding	0	0	0.144599	0.567233	0	0	0.631697	0.0180445	1	0	0.891012	0.00163162	1
C19orf60	ENSG00000006015	protein_coding	0	0	-0.198241	0.684042	0	0	-0.959802	0.0130751	0	1	-0.828584	0.0523999	0
CRLF1	ENSG00000006016	protein_coding	0	0	-0.482494	0.551368	0	0	-0.203477	0.889075	0	0	-0.105963	0.94268	0
OSBPL7	ENSG00000006025	protein_coding	0	0	0.9011	0.349474	0	0	-0.813565	0.402106	0	0	-1.52058	0.0281195	0
TMEM98	ENSG00000006042	protein_coding	0	0	0.916625	1.73095e-05	1	0	0.677777	0.0347456	1	0	0.132674	0.741381	0
YBX2	ENSG00000006047	protein_coding	0	0	-1.42173	NA	0	0	0.193666	NA	0	0	-2.397	NA	0
KRT33A	ENSG00000006059	protein_coding	0	0	NA	NA	0	0	NA	NA	0	0	NA	NA	0
MAP3K14	ENSG00000006062	protein_coding	0	0	0.949457	0.0665742	0	0	0.318263	0.725155	0	0	0.330828	0.67782	0
ABCC8	ENSG00000006071	protein_coding	0	0	-0.163282	0.899971	0	0	-1.38908	0.112479	0	0	-1.27223	0.153217	0
CACNG3	ENSG00000006116	protein_coding	0	0	NA	NA	0	0	NA	NA	0	0	NA	NA	0
TMEM132A	ENSG00000006118	protein_coding	0	0	0.120182	0.708475	0	0	-0.395537	0.184356	0	0	-0.723754	0.00569124	0
AP2B1	ENSG00000006125	protein_coding	0	0	0.175563	0.229147	0	0	0.480834	0.00237472	1	0	0.410441	0.023781	1
TAC1	ENSG00000006128	protein_coding	0	0	-1.62047	NA	0	0	0.587413	NA	0	0	0.420332	NA	0
ZNF263	ENSG00000006194	protein_coding	0	0	0.702104	0.00338207	1	0	0.475546	0.162622	0	0	0.762309	0.0258638	1
CX3CL1	ENSG00000006210	protein_coding	0	0	1.33964	NA	0	0	0.193666	NA	0	0	-1.93006	NA	0
SPATA20	ENSG00000006282	protein_coding	0	0	0.531807	0.177886	0	0	-0.397184	0.452185	0	0	-0.238836	0.687131	0
CACNA1G	ENSG00000006283	protein_coding	0	0	-0.107965	0.94814	0	0	0.113573	NA	0	0	-1.0732	0.397957	0
TNFRSF12A	ENSG00000006327	protein_coding	0	0	-0.0382675	0.972128	0	0	-0.277899	0.81949	0	0	-0.161671	0.898022	0
DLX6	ENSG00000006377	protein_coding	0	0	-0.0418879	0.965095	0	0	-0.167126	0.889075	0	0	-0.0163503	0.989731	0
MAP3K9	ENSG00000006432	protein_coding	0	0	0.289964	0.470631	0	0	0.103837	0.889211	0	0	-0.363051	0.461146	0
RALA	ENSG00000006451	protein_coding	0	0	-0.610901	0.00579378	0	1	0.0404926	0.949112	0	0	0.410611	0.330717	0
BAIAP2L1	ENSG00000006453	protein_coding	0	0	0.54297	0.0629526	0	0	0.276376	0.566446	0	0	0.420141	0.338889	0
KDM7A	ENSG00000006459	protein_coding	0	0	-0.0409349	0.91	0	0	0.555135	0.0460285	1	0	0.920889	0.00307703	1
ETV1	ENSG00000006468	protein_coding	0	0	0.368365	NA	0	0	1.84529	NA	0	0	0.7131	0.708101	0
AGK	ENSG00000006530	protein_coding	0	0	0.0706263	0.871255	0	0	0.0873228	0.882378	0	0	0.534724	0.241749	0
ALDH3B1	ENSG00000006534	protein_coding	0	0	0.457264	0.715033	0	0	-0.956117	0.383014	0	0	-0.757073	0.527601	0
TTC22	ENSG00000006555	protein_coding	0	0	-2.45911	NA	0	0	NA	NA	0	0	-4.13362	NA	0
PHTF2	ENSG00000006576	protein_coding	0	0	-0.610334	0.00408474	0	1	0.306354	0.487814	0	0	0.494215	0.237413	0
CCL26	ENSG00000006606	protein_coding	0	0	0.340692	NA	0	0	0.588662	NA	0	0	0.421613	NA	0
FARP2	ENSG00000006607	protein_coding	0	0	-0.0481924	0.883424	0	0	0.236492	0.497373	0	0	0.323587	0.340006	0
USH1C	ENSG00000006611	protein_coding	0	0	-0.112863	0.867056	0	0	-0.121739	0.900185	0	0	-0.253062	0.758735	0
GGCT	ENSG00000006625	protein_coding	0	0	0.521624	0.193473	0	0	0.321672	0.581537	0	0	0.706286	0.187453	0
DBF4	ENSG00000006634	protein_coding	0	0	-0.622951	0.000878623	0	1	0.59325	0.0759532	0	0	1.21768	0.000363243	1
TBXA2R	ENSG00000006638	protein_coding	0	0	0.784314	0.525683	0	0	-0.763006	0.54405	0	0	-1.01382	0.355956	0
IFRD1	ENSG00000006652	protein_coding	0	0	-0.191044	0.364906	0	0	0.286424	0.247993	0	0	0.812511	0.000485603	1
LGALS14	ENSG00000006659	protein_coding	0	0	NA	NA	0	0	NA	NA	0	0	NA	NA	0
COX10	ENSG00000006695	protein_coding	0	0	0.0228815	0.96538	0	0	-0.00197935	0.998101	0	0	0.223354	0.697516	0
GTF2IRD1	ENSG00000006704	protein_coding	0	0	0.495158	0.0815193	0	0	-0.0916428	0.860266	0	0	0.130224	0.788544	0
PAF1	ENSG00000006712	protein_coding	0	0	0.117968	0.628253	0	0	0.146696	0.643217	0	0	0.203777	0.504613	0
VPS41	ENSG00000006715	protein_coding	0	0	-0.119977	0.668725	0	0	0.81405	0.00212225	1	0	1.03649	0.000252699	1
ARHGAP44	ENSG00000006740	protein_coding	0	0	0.549475	0.0920346	0	0	0.194389	0.721315	0	0	0.0673732	0.913666	0
ELAC2	ENSG00000006744	protein_coding	1	0	0.645527	4.41465e-07	1	0	0.548326	0.00055385	1	0	0.731007	1.85803e-05	1
SCIN	ENSG00000006747	protein_coding	0	0	-0.444785	NA	0	0	1.89132	NA	0	0	1.8375	NA	0
ARSD	ENSG00000006756	protein_coding	0	0	-2.61644	NA	0	0	-2.24617	NA	0	0	-4.13362	NA	0
PNPLA4	ENSG00000006757	protein_coding	0	0	0.716019	NA	0	0	0.402233	NA	0	0	1.45065	NA	0
MYH13	ENSG00000006788	protein_coding	0	0	NA	NA	0	0	NA	NA	0	0	NA	NA	0
ADIPOR2	ENSG00000006831	protein_coding	0	0	0.165422	0.420917	0	0	0.862589	3.33684e-05	1	0	0.649389	0.00510103	1
CDKL3	ENSG00000006837	protein_coding	0	0	-0.139877	NA	0	0	-0.318584	NA	0	0	1.14415	NA	0
UPP2	ENSG00000007001	protein_coding	0	0	NA	NA	0	0	NA	NA	0	0	NA	NA	0
PRSS21	ENSG00000007038	protein_coding	0	0	NA	NA	0	0	NA	NA	0	0	NA	NA	0
MARK4	ENSG00000007047	protein_coding	0	0	0.155994	0.626837	0	0	0.183183	0.667932	0	0	0.0865131	0.849766	0
PROM1	ENSG00000007062	protein_coding	0	0	0.342383	NA	0	0	0.587413	NA	0	0	0.420332	NA	0
CCDC124	ENSG00000007080	protein_coding	0	0	0.61028	0.0070555	1	0	-0.899004	2.03218e-05	0	1	-0.782391	0.00130033	0
CEACAM21	ENSG00000007129	protein_coding	0	0	NA	NA	0	0	NA	NA	0	0	NA	NA	0
PAFAH1B1	ENSG00000007168	protein_coding	1	0	0.356837	0.0209969	1	0	0.938234	2.40741e-09	1	0	0.855308	2.02218e-06	1
NOS2	ENSG00000007171	protein_coding	0	0	0.463097	0.490014	0	0	0.127244	0.90909	0	0	-0.00522351	0.996463	0
DNAH9	ENSG00000007174	protein_coding	0	0	1.34117	NA	0	0	1.58776	NA	0	0	1.42068	NA	0
KIAA0100	ENSG00000007202	protein_coding	1	0	0.7534	1.3479e-09	1	0	0.465977	0.0072032	1	0	0.435878	0.0318738	1
SLC13A2	ENSG00000007216	protein_coding	0	0	NA	NA	0	0	NA	NA	0	0	NA	NA	0
GAS7	ENSG00000007237	protein_coding	0	0	0.669613	0.206518	0	0	0.482225	0.547455	0	0	0.226906	0.785924	0
TRAPPC6A	ENSG00000007255	protein_coding	0	0	0.0330833	0.970819	0	0	-0.5881	0.43231	0	0	-0.0605788	0.955904	0
MATK	ENSG00000007264	protein_coding	0	0	0.285569	0.4243	0	0	-0.0288699	0.964351	0	0	-0.299984	0.478605	0
CEACAM7	ENSG00000007306	protein_coding	0	0	NA	NA	0	0	NA	NA	0	0	NA	NA	0
CD79B	ENSG00000007312	protein_coding	0	0	-1.82281	NA	0	0	NA	NA	0	0	NA	NA	0
SCN4A	ENSG00000007314	protein_coding	0	0	0.834153	0.513527	0	0	-0.0490349	0.979189	0	0	-0.881458	0.436583	0
ST7L	ENSG00000007341	protein_coding	0	0	-0.581767	0.0580691	0	0	-0.250776	0.66976	0	0	0.0560908	0.939411	0
TKTL1	ENSG00000007350	protein_coding	0	0	0.342383	NA	0	0	0.587413	NA	0	0	-3.81399	NA	0
PAX6	ENSG00000007372	protein_coding	0	0	-0.144999	0.68914	0	0	-0.309455	0.461705	0	0	-0.204197	0.658395	0
RPUSD1	ENSG00000007376	protein_coding	0	0	0.0926404	0.767407	0	0	-0.198453	0.577979	0	0	-0.615122	0.020144	0
RHBDF1	ENSG00000007384	protein_coding	0	0	0.0774822	0.914949	0	0	-0.804052	0.171411	0	0	-0.919418	0.0785308	0
LUC7L	ENSG00000007392	protein_coding	0	0	-0.312883	0.260139	0	0	-0.519321	0.124585	0	0	-0.292065	0.494676	0
CACNA2D2	ENSG00000007402	protein_coding	0	0	-0.138996	0.788839	0	0	-0.133132	0.8685	0	0	-0.0020489	0.998389	0
BAIAP3	ENSG00000007516	protein_coding	0	0	0.599939	0.594743	0	0	-1.07011	0.200279	0	0	-0.821167	0.390327	0
TSR3	ENSG00000007520	protein_coding	0	0	0.933164	0.000465845	1	0	0.119278	0.803959	0	0	0.287125	0.502068	0
PIGQ	ENSG00000007541	protein_coding	0	0	0.159395	0.720252	0	0	-0.560386	0.146207	0	0	-1.13818	0.000867656	0
CRAMP1	ENSG00000007545	protein_coding	0	0	0.927676	0.0130873	1	0	0.0126646	0.986888	0	0	0.31384	0.591863	0
TEAD3	ENSG00000007866	protein_coding	0	0	-0.438741	0.306801	0	0	-0.391429	0.559756	0	0	-0.591672	0.291047	0
SELE	ENSG00000007908	protein_coding	0	0	NA	NA	0	0	NA	NA	0	0	NA	NA	0
DNAJC11	ENSG00000007923	protein_coding	0	0	-0.139203	0.671485	0	0	-0.155694	0.708926	0	0	0.160152	0.713794	0
FMO3	ENSG00000007933	protein_coding	0	0	-1.41865	NA	0	0	-1.62713	NA	0	0	-2.34341	NA	0
MYLIP	ENSG00000007944	protein_coding	0	0	-0.115895	0.813755	0	0	-0.0584653	0.937146	0	0	0.371533	0.522453	0
NOX1	ENSG00000007952	protein_coding	0	0	-1.45227	NA	0	0	-1.21709	NA	0	0	0.292956	NA	0
E2F2	ENSG00000007968	protein_coding	0	0	NA	NA	0	0	NA	NA	0	0	NA	NA	0
PSMB1	ENSG00000008018	protein_coding	0	0	-0.0161823	0.953028	0	0	0.0122168	0.973022	0	0	0.333404	0.173766	0
SYN1	ENSG00000008056	protein_coding	0	0	0.572471	NA	0	0	-0.27508	NA	0	0	-0.082056	0.971011	0
JARID2	ENSG00000008083	protein_coding	0	0	0.487101	0.02105	1	0	0.354886	0.245155	0	0	0.562033	0.0642099	0
CDKL5	ENSG00000008086	protein_coding	0	0	-0.341823	0.557113	0	0	-0.349422	0.671515	0	0	-0.355976	0.65718	0
CAMK1G	ENSG00000008118	protein_coding	0	0	0.872109	NA	0	0	1.06676	NA	0	0	0.157303	NA	0
CDK11A	ENSG00000008128	protein_coding	0	0	-2.24676	NA	0	0	-1.8612	NA	0	0	-1.4484	NA	0
NADK	ENSG00000008130	protein_coding	0	0	0.651672	0.000653381	1	0	0.260959	0.40606	0	0	0.0458021	0.913981	0
TFAP2B	ENSG00000008196	protein_coding	0	0	NA	NA	0	0	NA	NA	0	0	NA	NA	0
TFAP2D	ENSG00000008197	protein_coding	0	0	NA	NA	0	0	NA	NA	0	0	NA	NA	0
DLEC1	ENSG00000008226	protein_coding	0	0	-0.998259	NA	0	0	-1.99628	0.130236	0	0	-2.72731	0.00729498	0
CYTH3	ENSG00000008256	protein_coding	1	0	0.654215	0.00982852	1	0	0.694054	0.039274	1	0	0.781254	0.0319748	1
ADAM22	ENSG00000008277	protein_coding	0	0	0.0562659	0.897642	0	0	0.401794	0.330808	0	0	0.609467	0.137106	0
SYPL1	ENSG00000008282	protein_coding	0	0	0.204594	0.424753	0	0	1.00196	0.000960095	1	0	0.245309	0.549421	0
CYB561	ENSG00000008283	protein_coding	0	0	0.62939	0.209799	0	0	-0.451826	0.463852	0	0	-0.456959	0.453761	0
SPAG9	ENSG00000008294	protein_coding	0	0	0.14386	0.384251	0	0	0.713763	2.0883e-07	1	0	1.00644	1.52116e-10	1
CELSR3	ENSG00000008300	protein_coding	0	0	-0.112273	0.818122	0	0	-0.416708	0.378038	0	0	-0.502729	0.264677	0
AASS	ENSG00000008311	protein_coding	0	0	-0.337885	0.247271	0	0	0.362564	0.430927	0	0	0.86557	0.0419687	1
PLEKHG6	ENSG00000008323	protein_coding	0	0	0.48675	NA	0	0	-0.36854	NA	0	0	-1.00784	0.617506	0
SS18L2	ENSG00000008324	protein_coding	0	0	-0.982487	0.00663142	0	1	-0.203959	0.824694	0	0	-0.423521	0.57123	0
MPND	ENSG00000008382	protein_coding	0	0	0.318574	0.681848	0	0	-0.718892	0.324241	0	0	-0.817669	0.288156	0
MGST1	ENSG00000008394	protein_coding	0	0	-1.55523	0.0142225	0	1	-0.297139	0.8685	0	0	1.29726	0.474263	0
CRY1	ENSG00000008405	protein_coding	0	0	0.0311592	0.937889	0	0	0.549953	0.13367	0	0	0.506809	0.190177	0
PGLYRP1	ENSG00000008438	protein_coding	0	0	-1.06955	NA	0	0	-1.70558	NA	0	0	-2.22897	NA	0
NFIX	ENSG00000008441	protein_coding	0	0	0.411449	0.179065	0	0	-0.063412	0.913715	0	0	-0.095118	0.851547	0
ST3GAL1	ENSG00000008513	protein_coding	0	0	-0.121531	0.804377	0	0	0.0915015	0.905053	0	0	0.236912	0.713759	0
MMP25	ENSG00000008516	protein_coding	0	0	-0.400526	NA	0	0	-1.28166	NA	0	0	-1.68889	0.36001	0
IL32	ENSG00000008517	protein_coding	0	0	2.34194	NA	0	0	-1.26675	NA	0	0	2.4201	NA	0
PKD1	ENSG00000008710	protein_coding	0	0	0.101824	0.714414	0	0	-1.07421	9.22722e-09	0	1	-1.169	7.43668e-09	0
MAPK8IP2	ENSG00000008735	protein_coding	0	0	0.132334	0.687788	0	0	-0.486278	0.116485	0	0	-1.0571	4.44171e-05	0
MED24	ENSG00000008838	protein_coding	0	0	0.645901	4.56056e-05	1	0	0.0303778	0.933876	0	0	-0.171622	0.514376	0
RHOBTB2	ENSG00000008853	protein_coding	0	0	0.795016	0.191394	0	0	0.201319	0.842266	0	0	-0.283997	0.728589	0
HEATR5B	ENSG00000008869	protein_coding	0	0	0.041639	0.873212	0	0	0.495094	0.0340499	1	0	0.835495	0.00104778	1
SEC62	ENSG00000008952	protein_coding	0	0	-0.0448525	0.859514	0	0	0.89053	2.33997e-05	1	0	1.05946	2.92058e-06	1
RPS20	ENSG00000008988	protein_coding	0	1	-0.397073	0.000903547	0	1	-0.517405	0.000199413	0	1	-0.0880031	0.729029	0
CSDE1	ENSG00000009307	protein_coding	0	0	-0.0730477	0.627626	0	0	0.860084	4.92593e-17	1	0	1.131	4.82259e-20	1
UBE3C	ENSG00000009335	protein_coding	0	0	0.226737	0.0979855	0	0	0.984164	4.25462e-11	1	0	1.04395	1.24182e-10	1
REV3L	ENSG00000009413	protein_coding	0	0	-0.398819	0.0398358	0	1	-0.0134616	0.97526	0	0	0.315597	0.342435	0
TENM1	ENSG00000009694	protein_coding	0	0	-0.39115	0.36298	0	0	-0.654777	0.214532	0	0	-0.191249	0.796792	0
PAX7	ENSG00000009709	protein_coding	0	0	-0.104832	NA	0	0	0.183636	NA	0	0	-0.0111372	0.996752	0
MASP2	ENSG00000009724	protein_coding	0	0	0.068254	0.964432	0	0	-0.830746	0.492692	0	0	-0.316944	0.838397	0
IYD	ENSG00000009765	protein_coding	0	0	-2.45911	NA	0	0	NA	NA	0	0	NA	NA	0
FAM76A	ENSG00000009780	protein_coding	0	0	-0.419143	0.159357	0	0	0.425812	0.406817	0	0	0.494438	0.36001	0
TRAF3IP3	ENSG00000009790	protein_coding	0	0	-1.06261	NA	0	0	-0.405729	NA	0	0	-0.827067	NA	0
POMT2	ENSG00000009830	protein_coding	0	0	0.241146	0.456464	0	0	-0.257457	0.539541	0	0	-0.488564	0.151152	0
VTA1	ENSG00000009844	protein_coding	0	0	-0.195274	0.399103	0	0	0.436054	0.109807	0	0	1.35378	6.33e-07	1
MLXIPL	ENSG00000009950	protein_coding	0	0	0.243634	0.76707	0	0	-0.988794	0.0677299	0	0	-1.31752	0.00713468	0
BAZ1B	ENSG00000009954	protein_coding	1	0	0.479478	5.44322e-05	1	0	0.874099	2.71455e-10	1	0	1.05687	2.53437e-11	1
RANBP9	ENSG00000010017	protein_coding	0	0	-0.537279	0.030076	0	1	-0.0554307	0.921655	0	0	0.333348	0.452809	0
ETV7	ENSG00000010030	protein_coding	0	0	1.3427	NA	0	0	1.58662	NA	0	0	1.41952	NA	0
SPRTN	ENSG00000010072	protein_coding	0	0	-0.112352	0.619192	0	0	0.800964	0.000569317	1	0	1.00161	8.04677e-05	1
METTL13	ENSG00000010165	protein_coding	0	0	0.784141	0.000111984	1	0	0.124328	0.748201	0	0	-0.164216	0.629606	0
DYRK4	ENSG00000010219	protein_coding	0	0	-0.423887	0.544223	0	0	-0.958452	0.184789	0	0	-0.580211	0.530138	0
ZNF207	ENSG00000010244	protein_coding	0	0	-0.484494	0.00024131	0	1	-0.314983	0.131919	0	0	-0.123647	0.666585	0
UQCRC1	ENSG00000010256	protein_coding	0	0	0.211199	0.21716	0	0	0.0138316	0.966417	0	0	0.379215	0.139692	0
STARD3NL	ENSG00000010270	protein_coding	0	0	-0.361683	0.149538	0	0	0.781911	0.0365638	1	0	1.1167	0.00583074	1
CD9	ENSG00000010278	protein_coding	0	0	-0.12705	0.738899	0	0	0.683194	0.127391	0	0	0.918881	0.0427606	1
HHATL	ENSG00000010282	protein_coding	0	0	-1.82281	NA	0	0	NA	NA	0	0	NA	NA	0
NCAPD2	ENSG00000010292	protein_coding	1	0	0.4109	0.000985671	1	0	0.76139	6.19486e-08	1	0	0.850635	1.65936e-06	1
IFFO1	ENSG00000010295	protein_coding	0	0	0.372148	0.2834	0	0	-0.303766	0.484096	0	0	-1.12031	0.000200598	0
GIPR	ENSG00000010310	protein_coding	0	0	-0.791504	0.49761	0	0	-0.839063	NA	0	0	-1.68246	0.139914	0
PHF7	ENSG00000010318	protein_coding	0	0	-1.02143	0.0115976	0	1	-0.217221	0.830961	0	0	-0.753692	0.273388	0
SEMA3G	ENSG00000010319	protein_coding	0	0	0.724258	0.228239	0	0	-0.343721	0.671515	0	0	-0.0717467	0.942033	0
NISCH	ENSG00000010322	protein_coding	0	1	-0.393167	0.0327984	0	1	-0.546237	0.0127986	0	1	-0.805421	0.000129752	0
STAB1	ENSG00000010327	protein_coding	0	0	-0.922732	NA	0	0	-1.81764	NA	0	0	-1.5526	0.37544	0
FUZ	ENSG00000010361	protein_coding	0	0	0.695973	0.0917838	0	0	-0.412987	0.476938	0	0	-0.133278	0.842822	0
SLC6A13	ENSG00000010379	protein_coding	0	0	1.89104	NA	0	0	-1.15555	NA	0	0	-2.02321	0.0740899	0
IDS	ENSG00000010404	protein_coding	0	0	-0.307225	0.345835	0	0	-0.142265	0.794813	0	0	-0.631102	0.0872489	0
PRSS3	ENSG00000010438	protein_coding	0	0	-1.82281	NA	0	0	NA	NA	0	0	-2.64947	NA	0
ZNF200	ENSG00000010539	protein_coding	0	0	0.655027	0.0989173	0	0	0.505424	0.345629	0	0	0.65321	0.219333	0
CD4	ENSG00000010610	protein_coding	0	0	-0.216029	NA	0	0	-1.08359	NA	0	0	-2.01845	0.118219	0
LRRC23	ENSG00000010626	protein_coding	0	0	0.0341387	0.982775	0	0	0.596566	NA	0	0	0.603302	0.729378	0
BTK	ENSG00000010671	protein_coding	0	0	-1.64132	NA	0	0	-0.136336	NA	0	0	-2.29029	NA	0
HFE	ENSG00000010704	protein_coding	0	0	-1.07091	NA	0	0	-2.59241	NA	0	0	-2.22798	NA	0
SCMH1	ENSG00000010803	protein_coding	0	0	0.100413	0.811195	0	0	-0.486861	0.14872	0	0	-0.325614	0.41672	0
FYN	ENSG00000010810	protein_coding	0	0	0.55019	0.000480272	1	0	0.399804	0.0728143	0	0	0.551071	0.0210872	1
HIVEP2	ENSG00000010818	protein_coding	0	0	0.431	0.124491	0	0	0.510871	0.185209	0	0	0.793886	0.0550724	0
FMO1	ENSG00000010932	protein_coding	0	0	-0.585699	NA	0	0	-1.423	NA	0	0	0.624642	NA	0
TCEB3	ENSG00000011007	protein_coding	0	0	0.296813	0.116011	0	0	0.685398	0.00388235	1	0	1.22303	1.92746e-06	1
LYPLA2	ENSG00000011009	protein_coding	0	0	-0.34728	0.338006	0	0	-0.524112	0.221941	0	0	-1.36657	8.00881e-06	0
CLCN6	ENSG00000011021	protein_coding	0	0	-0.124283	0.85189	0	0	-0.439386	0.506293	0	0	-0.690662	0.221716	0
MRC2	ENSG00000011028	protein_coding	0	0	0.804868	0.00480565	1	0	-0.703955	0.0111222	0	1	-0.525694	0.157598	0
NME1-NME2	ENSG00000011052	protein_coding	0	0	NA	NA	0	0	NA	NA	0	0	NA	NA	0
SLC6A7	ENSG00000011083	protein_coding	0	0	NA	NA	0	0	NA	NA	0	0	NA	NA	0
TSPAN9	ENSG00000011105	protein_coding	0	0	0.755006	0.0365277	1	0	0.640155	0.185191	0	0	0.425271	0.413755	0
BTBD7	ENSG00000011114	protein_coding	0	0	0.747059	NA	0	0	2.05464	NA	0	0	1.14512	0.578805	0
APBA3	ENSG00000011132	protein_coding	0	0	0.0310425	0.965095	0	0	-0.265717	0.724647	0	0	-0.113455	0.892961	0
MKS1	ENSG00000011143	protein_coding	0	0	0.300718	0.356469	0	0	-0.0237113	0.968938	0	0	0.332176	0.449698	0
ABHD5	ENSG00000011198	protein_coding	0	0	-0.291231	0.593845	0	0	0.508599	0.512547	0	0	0.183582	0.82703	0
ANOS1	ENSG00000011201	protein_coding	0	0	NA	NA	0	0	NA	NA	0	0	NA	NA	0
AKAP8L	ENSG00000011243	protein_coding	0	0	0.0396016	0.925995	0	0	-0.164908	0.721315	0	0	-0.126782	0.790071	0
MBTD1	ENSG00000011258	protein_coding	0	0	0.158385	0.515198	0	0	0.40827	0.179031	0	0	0.825143	0.00555954	1
UTP18	ENSG00000011260	protein_coding	0	0	0.186357	0.301037	0	0	0.895935	2.33076e-06	1	0	1.0933	2.08886e-07	1
RNF216	ENSG00000011275	protein_coding	0	0	0.399271	0.0508139	0	0	0.696272	0.00503024	1	0	1.1121	3.09798e-05	1
TTC19	ENSG00000011295	protein_coding	0	0	0.255872	0.169071	0	0	0.614754	0.00340579	1	0	0.817791	0.000233219	1
PTBP1	ENSG00000011304	protein_coding	0	0	0.235369	0.0737098	0	0	-0.00545452	0.982271	0	0	-0.405235	0.00438864	0
DPF1	ENSG00000011332	protein_coding	0	0	0.643086	0.182483	0	0	0.242557	0.752816	0	0	-0.0674733	0.935469	0
SYT7	ENSG00000011347	protein_coding	0	0	0.589346	0.360606	0	0	0.513026	0.558846	0	0	0.121033	0.898393	0
LARS2	ENSG00000011376	protein_coding	1	0	0.766192	5.69446e-07	1	0	0.886743	2.92419e-05	1	0	1.10472	1.47685e-06	1
PIK3C2A	ENSG00000011405	protein_coding	0	0	-0.422438	0.0136439	0	1	0.28952	0.321197	0	0	0.88623	0.000666256	1
PLAUR	ENSG00000011422	protein_coding	0	0	0.85169	0.317642	0	0	-0.11942	0.929619	0	0	-0.450213	0.643989	0
ANLN	ENSG00000011426	protein_coding	0	0	-0.456052	0.001536	0	1	0.284238	0.247009	0	0	0.564849	0.0193366	1
WIZ	ENSG00000011451	protein_coding	0	0	0.743738	0.000392532	1	0	-0.0203482	0.962061	0	0	-0.403815	0.0985502	0
RABGAP1	ENSG00000011454	protein_coding	0	0	0.0295226	0.930426	0	0	0.631173	0.0176608	1	0	0.886322	0.000900943	1
DCN	ENSG00000011465	protein_coding	0	0	NA	NA	0	0	NA	NA	0	0	NA	NA	0
QPCTL	ENSG00000011478	protein_coding	0	0	-0.256818	0.493607	0	0	-0.293935	0.573473	0	0	-1.13104	0.000691161	0
PPP5C	ENSG00000011485	protein_coding	0	0	0.564053	0.000106053	1	0	0.383774	0.0662906	0	0	0.457626	0.0524989	0
CEP68	ENSG00000011523	protein_coding	0	0	0.121345	0.747338	0	0	0.199307	0.677851	0	0	0.329605	0.460041	0
MAP4K3	ENSG00000011566	protein_coding	0	0	0.197961	0.463486	0	0	1.15206	0.000298631	1	0	1.40758	3.44292e-05	1
ZBTB32	ENSG00000011590	protein_coding	0	0	-0.916003	NA	0	0	-2.07329	NA	0	0	-0.903443	NA	0
TYROBP	ENSG00000011600	protein_coding	0	0	NA	NA	0	0	NA	NA	0	0	NA	NA	0
TMEM159	ENSG00000011638	protein_coding	0	0	0.0721059	0.914949	0	0	0.595952	0.424272	0	0	-0.0771269	0.931634	0
GABRA3	ENSG00000011677	protein_coding	0	0	NA	NA	0	0	NA	NA	0	0	NA	NA	0
BRCA1	ENSG00000012048	protein_coding	0	0	0.216948	0.249118	0	0	0.921737	3.32286e-05	1	0	1.3889	7.77608e-10	1
ERCC1	ENSG00000012061	protein_coding	0	0	-0.190321	0.646313	0	0	-0.367815	0.467161	0	0	-0.317384	0.543543	0
CD22	ENSG00000012124	protein_coding	0	0	0.619847	NA	0	0	-1.29486	NA	0	0	1.42068	NA	0
SEMA3B	ENSG00000012171	protein_coding	0	0	-0.148845	0.917236	0	0	-1.98273	0.00911763	0	1	-1.6376	0.0654149	0
MBTPS2	ENSG00000012174	protein_coding	0	0	0.0842147	0.76883	0	0	0.499302	0.0912495	0	0	-0.120701	0.770171	0
PRICKLE3	ENSG00000012211	protein_coding	0	0	0.168772	0.760529	0	0	0.152595	0.846732	0	0	0.0502391	0.952495	0
LTF	ENSG00000012223	protein_coding	0	0	NA	NA	0	0	NA	NA	0	0	NA	NA	0
EXTL3	ENSG00000012232	protein_coding	0	0	0.374448	0.109531	0	0	0.362459	0.284304	0	0	0.290658	0.409561	0
NR1H4	ENSG00000012504	protein_coding	0	0	NA	NA	0	0	-2.43178	NA	0	0	NA	NA	0
ELOVL5	ENSG00000012660	protein_coding	0	0	-0.338428	0.030671	0	1	0.433452	0.0852686	0	0	-0.049649	0.886273	0
ALOX5	ENSG00000012779	protein_coding	0	0	1.34117	NA	0	0	0.190965	NA	0	0	-1.03247	NA	0
KDM5D	ENSG00000012817	protein_coding	0	0	NA	NA	0	0	NA	NA	0	0	NA	NA	0
CALCOCO1	ENSG00000012822	protein_coding	0	0	-0.0682754	0.866978	0	0	-0.0900387	0.871184	0	0	-0.417364	0.317782	0
UBR7	ENSG00000012963	protein_coding	0	0	0.112116	0.947562	0	0	0.143791	0.939594	0	0	0.90364	0.555211	0
MAP4K5	ENSG00000012983	protein_coding	0	0	-0.525987	0.00791997	0	1	0.0947742	0.843318	0	0	0.445626	0.238142	0
EHD3	ENSG00000013016	protein_coding	0	0	0.233413	0.607034	0	0	0.0315211	0.969657	0	0	0.544378	0.354219	0
PSMC4	ENSG00000013275	protein_coding	0	0	2.2613	0.00617108	1	0	-0.32678	0.779413	0	0	-0.129843	0.925432	0
MAN2B2	ENSG00000013288	protein_coding	0	0	-0.281631	0.57564	0	0	-0.598446	0.231311	0	0	-0.558733	0.307196	0
SLC7A14	ENSG00000013293	protein_coding	0	0	NA	NA	0	0	NA	NA	0	0	NA	NA	0
CLDN11	ENSG00000013297	protein_coding	0	0	NA	NA	0	0	NA	NA	0	0	NA	NA	0
SLC25A39	ENSG00000013306	protein_coding	0	0	0.126493	0.603607	0	0	-0.522243	0.00422805	0	1	-0.604026	0.00208754	0
MVP	ENSG00000013364	protein_coding	0	0	0.366913	0.607156	0	0	0.00393726	0.99783	0	0	-0.423858	0.603477	0
NUB1	ENSG00000013374	protein_coding	0	0	-0.181294	0.463486	0	0	0.340786	0.263179	0	0	0.618758	0.0307496	1
PGM3	ENSG00000013375	protein_coding	0	0	0.107734	0.682347	0	0	0.634564	0.0191715	1	0	0.925831	0.00180589	1
RWDD2A	ENSG00000013392	protein_coding	0	0	-0.398395	0.488743	0	0	0.315027	0.754597	0	0	-0.0507176	0.963484	0
CLK1	ENSG00000013441	protein_coding	0	0	-0.677859	0.00142164	0	1	-0.310394	0.431652	0	0	0.149905	0.744739	0
POLR3B	ENSG00000013503	protein_coding	0	0	0.397686	0.0723895	0	0	1.39719	6.18967e-09	1	0	1.31694	2.16294e-06	1
ANGEL1	ENSG00000013523	protein_coding	0	0	0.464574	0.0167428	1	0	0.572925	0.021627	1	0	0.302809	0.300741	0
RNF14	ENSG00000013561	protein_coding	0	0	-0.132182	0.651482	0	0	0.78662	0.0196931	1	0	0.812848	0.0171595	1
DNASE1L1	ENSG00000013563	protein_coding	0	0	-0.149189	0.853785	0	0	-0.823771	0.244534	0	0	-0.570851	0.485712	0
DDX11	ENSG00000013573	protein_coding	0	0	0.188593	0.426081	0	0	-0.287111	0.257656	0	0	-0.470992	0.0460888	0
HEBP1	ENSG00000013583	protein_coding	0	0	-0.0761631	0.890229	0	0	0.21946	0.726011	0	0	0.486334	0.397356	0
GPRC5A	ENSG00000013588	protein_coding	0	0	-0.109387	0.932824	0	0	-0.640014	0.61321	0	0	-1.09734	0.261943	0
MAMLD1	ENSG00000013619	protein_coding	0	0	0.125194	0.866375	0	0	0.236619	0.808285	0	0	0.220743	0.813869	0
CD6	ENSG00000013725	protein_coding	0	0	NA	NA	0	0	NA	NA	0	0	NA	NA	0
TACC3	ENSG00000013810	protein_coding	0	0	0.363069	0.0624232	0	0	-0.0463222	0.892612	0	0	0.101521	0.746041	0
UFL1	ENSG00000014123	protein_coding	0	0	0.0449384	0.899991	0	0	0.94322	0.000869144	1	0	1.45392	3.00704e-06	1
POLA2	ENSG00000014138	protein_coding	0	0	0.047073	0.880501	0	0	-0.136678	0.694982	0	0	-0.0388371	0.924454	0
ZC3H3	ENSG00000014164	protein_coding	0	0	0.337069	0.515198	0	0	-0.482635	0.413806	0	0	-0.726303	0.162554	0
CAPN1	ENSG00000014216	protein_coding	0	0	0.321877	0.11713	0	0	0.137346	0.668874	0	0	0.0275224	0.942276	0
ACPP	ENSG00000014257	protein_coding	0	0	1.94206	NA	0	0	-1.07711	NA	0	0	-0.234011	NA	0
MDH1	ENSG00000014641	protein_coding	0	0	-0.181193	0.433898	0	0	0.182297	0.516177	0	0	0.733417	0.00187341	1
SLC30A9	ENSG00000014824	protein_coding	0	0	-0.509445	0.000979061	0	1	0.534052	0.0095531	1	0	0.920862	2.27124e-05	1
MTMR11	ENSG00000014914	protein_coding	0	0	0.490082	0.626513	0	0	-0.315301	0.807986	0	0	-1.0325	0.239029	0
COX15	ENSG00000014919	protein_coding	0	0	-0.0895321	0.689491	0	0	0.692991	0.000992399	1	0	0.928367	6.7925e-05	1
CCDC88C	ENSG00000015133	protein_coding	0	0	0.483845	0.26957	0	0	-0.352042	0.534549	0	0	0.102145	0.893107	0
YAF2	ENSG00000015153	protein_coding	0	0	-0.410407	0.272532	0	0	0.342469	0.613379	0	0	0.723499	0.24907	0
ZMYND11	ENSG00000015171	protein_coding	0	0	0.228254	0.438353	0	0	0.389729	0.286261	0	0	1.18568	0.000357527	1
WAS	ENSG00000015285	protein_coding	0	0	0.384104	NA	0	0	-0.493518	NA	0	0	-1.19134	0.528632	0
DPEP1	ENSG00000015413	protein_coding	0	0	1.35067	NA	0	0	1.60388	NA	0	0	-0.457802	NA	0
BID	ENSG00000015475	protein_coding	0	0	-0.404853	0.391111	0	0	-0.694257	0.212801	0	0	-0.196441	0.802852	0
MATR3.2	ENSG00000015479	protein_coding	0	0	-1.55229	0.00174282	0	1	-1.13322	0.177689	0	0	-1.57738	0.0318585	0
NPC1L1	ENSG00000015520	protein_coding	0	0	0.092704	NA	0	0	-1.86685	NA	0	0	-2.03521	0.214612	0
XYLT2	ENSG00000015532	protein_coding	0	0	0.604106	0.013617	1	0	-0.129223	0.760188	0	0	-0.103598	0.813145	0
RGPD5	ENSG00000015568	protein_coding	0	0	1.03802	0.064991	0	0	0.465718	0.580287	0	0	0.856092	0.27563	0
STMN4	ENSG00000015592	protein_coding	0	0	NA	NA	0	0	-2.43178	NA	0	0	-4.26872	NA	0
NUDCD3	ENSG00000015676	protein_coding	0	0	0.785467	1.24399e-07	1	0	0.736282	0.000292078	1	0	0.280888	0.252034	0
ISL1	ENSG00000016082	protein_coding	0	0	-0.541877	0.247411	0	0	0.227858	0.795429	0	0	-0.00781191	0.994311	0
CHDH	ENSG00000016391	protein_coding	1	0	0.682768	0.00771303	1	0	0.867202	0.0130747	1	0	1.03678	0.00508233	1
IL20RA	ENSG00000016402	protein_coding	0	0	NA	NA	0	0	NA	NA	0	0	NA	NA	0
CLCA1	ENSG00000016490	protein_coding	0	0	NA	NA	0	0	NA	NA	0	0	NA	NA	0
CLCA4	ENSG00000016602	protein_coding	0	0	NA	NA	0	0	-2.43178	NA	0	0	NA	NA	0
GLT8D1	ENSG00000016864	protein_coding	0	0	-0.385434	0.132495	0	0	0.107164	0.846732	0	0	0.117379	0.824218	0
ATP2C1	ENSG00000017260	protein_coding	0	0	-0.180843	0.391393	0	0	0.666221	0.00585302	1	0	1.18437	1.69615e-06	1
IGF1	ENSG00000017427	protein_coding	0	0	0.342383	NA	0	0	0.587413	NA	0	0	0.420332	NA	0
SLC38A5	ENSG00000017483	protein_coding	0	0	-0.110845	NA	0	0	-1.56991	NA	0	0	-1.44901	NA	0
RALBP1	ENSG00000017797	protein_coding	0	0	0.264905	0.213827	0	0	0.949026	5.20806e-05	1	0	0.861714	0.000811183	1
RUFY3	ENSG00000018189	protein_coding	0	0	0.131899	0.668839	0	0	0.15378	0.714696	0	0	0.032714	0.948352	0
CNTN1	ENSG00000018236	protein_coding	0	0	0.123728	0.756913	0	0	1.15416	0.00415888	1	0	1.6924	0.000162171	1
SLC11A1	ENSG00000018280	protein_coding	0	0	0.179439	NA	0	0	-0.164817	NA	0	0	-0.994702	NA	0
WWTR1	ENSG00000018408	protein_coding	0	0	0.061671	0.903184	0	0	0.395028	0.449797	0	0	0.992253	0.0326909	1
AGPS	ENSG00000018510	protein_coding	0	0	-0.434289	0.0118314	0	1	0.395759	0.0935854	0	0	0.944927	4.36425e-05	1
ZNF806	ENSG00000018607	unprocessed_pseudogene	0	0	NA	NA	0	0	NA	NA	0	0	NA	NA	0
CXorf56	ENSG00000018610	protein_coding	0	0	-0.104312	0.67344	0	0	0.870854	6.90677e-05	1	0	0.542168	0.0259235	1
ATP1A2	ENSG00000018625	protein_coding	0	0	NA	NA	0	0	NA	NA	0	0	-2.39584	NA	0
TTC27	ENSG00000018699	protein_coding	0	0	-0.206853	0.452554	0	0	0.701506	0.0535222	0	0	1.18367	0.00173717	1
ZNF582	ENSG00000018869	protein_coding	0	0	-0.257254	0.835336	0	0	-0.451954	0.764578	0	0	0.171086	0.930184	0
VSIG2	ENSG00000019102	protein_coding	0	0	-0.271155	NA	0	0	-1.98998	0.124356	0	0	-2.18627	0.0727821	0
PHLDB1	ENSG00000019144	protein_coding	0	0	0.42585	0.172656	0	0	0.0530313	0.935077	0	0	0.0667831	0.907776	0
MARCO	ENSG00000019169	protein_coding	0	0	NA	NA	0	0	NA	NA	0	0	NA	NA	0
CYP24A1	ENSG00000019186	protein_coding	0	0	0.342383	NA	0	0	0.587413	NA	0	0	-0.954976	NA	0
PRDM11	ENSG00000019485	protein_coding	0	0	0.246463	0.710222	0	0	-0.333085	0.661435	0	0	0.230988	0.795713	0
SYT13	ENSG00000019505	protein_coding	0	0	-1.16477	NA	0	0	-0.454109	NA	0	0	1.6951	NA	0
SNAI2	ENSG00000019549	protein_coding	0	0	0.13256	0.704524	0	0	0.467267	0.200787	0	0	0.637438	0.0911545	0
CD74	ENSG00000019582	protein_coding	0	0	-0.257936	0.866964	0	0	-1.7471	0.0834137	0	0	-1.26532	0.3173	0
HGF	ENSG00000019991	protein_coding	0	0	1.61912	NA	0	0	-0.790005	NA	0	0	2.42128	NA	0
ZRANB1	ENSG00000019995	protein_coding	0	0	0.280184	0.380322	0	0	0.860164	0.0185023	1	0	1.2679	0.00163197	1
NCDN	ENSG00000020129	protein_coding	0	0	0.310424	0.241391	0	0	0.0797467	0.86219	0	0	-0.228109	0.492099	0
ADGRA2	ENSG00000020181	protein_coding	0	0	0.571354	0.0777337	0	0	-0.643376	0.0589336	0	0	-0.865852	0.00837668	0
CCT8L1P	ENSG00000020219	processed_pseudogene	0	0	-2.51011	NA	0	0	-4.3056	NA	0	0	NA	NA	0
ZFP64	ENSG00000020256	protein_coding	0	0	0.408925	0.111485	0	0	0.0714546	0.880933	0	0	0.075287	0.8637	0
MNAT1	ENSG00000020426	protein_coding	0	0	-0.301377	0.406866	0	0	0.365318	0.520772	0	0	0.175487	0.779606	0
SAMD4A	ENSG00000020577	protein_coding	0	0	0.0048826	0.994226	0	0	-0.288817	0.646421	0	0	0.0115828	0.989208	0
RUNX3	ENSG00000020633	protein_coding	0	0	-0.308529	0.641048	0	0	0.194069	0.8685	0	0	0.0667348	0.953239	0
MRE11	ENSG00000020922	protein_coding	0	0	-0.108497	0.634615	0	0	0.603754	0.00930108	1	0	0.974372	0.000139312	1
PLEKHB1	ENSG00000021300	protein_coding	0	0	0.617571	0.325078	0	0	-0.0532761	0.964586	0	0	-0.443741	0.525569	0
SERPINB1	ENSG00000021355	protein_coding	0	0	0.484689	0.343904	0	0	0.315299	0.686653	0	0	1.01228	0.145383	0
CYP3A43	ENSG00000021461	protein_coding	0	0	-0.379048	NA	0	0	-0.971754	NA	0	0	0.420332	NA	0
SLC7A9	ENSG00000021488	protein_coding	0	0	1.20528	NA	0	0	0.64277	NA	0	0	-1.34972	NA	0
SPAST	ENSG00000021574	protein_coding	0	0	0.128965	0.692242	0	0	1.09065	0.000247426	1	0	1.37191	2.59137e-05	1
NRXN3	ENSG00000021645	protein_coding	0	0	-0.180859	0.690457	0	0	0.216335	0.744666	0	0	-0.311711	0.591863	0
OSBPL5	ENSG00000021762	protein_coding	0	0	0.608798	0.205594	0	0	-0.476211	0.399191	0	0	0.00619483	0.994311	0
AQR	ENSG00000021776	protein_coding	0	0	0.105937	0.722206	0	0	0.423463	0.126471	0	0	0.989328	0.000340376	1
CPS1	ENSG00000021826	protein_coding	0	0	-0.21521	0.435844	0	0	1.20552	0.00034379	1	0	1.68294	9.87093e-06	1
C8B	ENSG00000021852	protein_coding	0	0	0.340692	NA	0	0	0.588662	NA	0	0	0.421613	NA	0
FHL1	ENSG00000022267	protein_coding	0	0	0.3459	0.026328	1	0	0.855946	1.24209e-08	1	0	0.367317	0.052398	0
RTFDC1	ENSG00000022277	protein_coding	0	0	-0.331311	0.121419	0	0	0.194042	0.620108	0	0	-0.0931972	0.822609	0
GABRA1	ENSG00000022355	protein_coding	0	0	NA	NA	0	0	NA	NA	0	0	NA	NA	0
NLRP2	ENSG00000022556	protein_coding	0	0	NA	NA	0	0	NA	NA	0	0	NA	NA	0
SLC45A4	ENSG00000022567	protein_coding	0	0	0.483251	0.368627	0	0	0.0215896	0.982328	0	0	0.0987695	0.91196	0
RNF10	ENSG00000022840	protein_coding	0	0	-0.0464743	0.858898	0	0	-0.047302	0.889483	0	0	0.261133	0.333233	0
ZNF839	ENSG00000022976	protein_coding	0	0	0.708564	0.0917838	0	0	0.272043	0.686588	0	0	0.0110204	0.989208	0
ZDHHC6	ENSG00000023041	protein_coding	0	0	-0.457376	0.0371879	0	1	-0.164573	0.705162	0	0	0.447652	0.24768	0
GRAMD1B	ENSG00000023171	protein_coding	0	0	0.171115	0.786985	0	0	0.0214983	0.982328	0	0	-0.277793	0.700047	0
RNH1	ENSG00000023191	protein_coding	0	0	0.549835	0.874713	0	0	-1.76935	0.0081675	0	1	0.402464	0.783967	0
NDUFS1	ENSG00000023228	protein_coding	0	0	-0.0614459	0.968277	0	0	0.412697	0.494292	0	0	0.64192	0.266358	0
RB1CC1	ENSG00000023287	protein_coding	0	0	-0.176374	0.385901	0	0	0.812299	3.16988e-05	1	0	1.54327	1.00216e-12	1
ERP44	ENSG00000023318	protein_coding	0	0	-0.200088	0.483967	0	0	0.335193	0.407752	0	0	0.577929	0.13866	0
ALAS1	ENSG00000023330	protein_coding	0	0	0.077394	0.8082	0	0	0.026686	0.957304	0	0	0.273074	0.451253	0
BIRC3	ENSG00000023445	protein_coding	0	0	-0.380614	NA	0	0	-0.80445	NA	0	0	0.421613	NA	0
AKAP11	ENSG00000023516	protein_coding	0	0	-0.194323	0.433898	0	0	0.655926	0.00590781	1	0	0.872779	0.00369303	1
GLRX2	ENSG00000023572	protein_coding	0	0	-0.516648	0.353369	0	0	-0.14968	0.893656	0	0	0.309166	0.769594	0
SNAPC1	ENSG00000023608	protein_coding	0	0	0.603972	0.211472	0	0	1.4473	0.0214594	1	0	1.15066	0.0785308	0
DERA	ENSG00000023697	protein_coding	0	0	-0.545423	0.0844592	0	0	0.44452	0.49492	0	0	0.716474	0.225533	0
STRAP	ENSG00000023734	protein_coding	0	0	-0.0607624	0.752409	0	0	0.373025	0.0429153	1	0	0.114273	0.680565	0
ABCC2	ENSG00000023839	protein_coding	0	0	-1.39493	NA	0	0	-1.54044	NA	0	0	-1.22577	0.55361	0
DEF6	ENSG00000023892	protein_coding	0	0	0.911218	0.122574	0	0	0.537925	0.543989	0	0	0.648806	0.465892	0
PLEKHO1	ENSG00000023902	protein_coding	0	0	0.146406	0.720738	0	0	0.0323441	0.964297	0	0	0.152885	0.783368	0
GCLM	ENSG00000023909	protein_coding	0	0	-0.0468445	0.911634	0	0	0.712041	0.0774872	0	0	0.776107	0.0618605	0
UBR2	ENSG00000024048	protein_coding	0	0	0.235793	0.245658	0	0	0.645681	0.00288445	1	0	0.940448	0.00012827	1
EHD2	ENSG00000024422	protein_coding	0	0	0.725397	0.31019	0	0	0.0884563	0.943596	0	0	-0.570817	0.447872	0
DEPDC1	ENSG00000024526	protein_coding	0	0	-0.176135	0.437918	0	0	1.0172	1.16812e-06	1	0	1.96169	6.49323e-15	1
CCDC28A	ENSG00000024862	protein_coding	0	0	0.0742639	0.878036	0	0	0.299544	0.590178	0	0	0.874862	0.0797581	0
RRAGD	ENSG00000025039	protein_coding	0	0	-0.18374	0.533267	0	0	0.838155	0.0158263	1	0	0.69278	0.0644936	0
HSF2	ENSG00000025156	protein_coding	0	0	-0.378383	0.0539806	0	0	0.610162	0.0506895	0	0	1.01525	0.000889516	1
PHF20	ENSG00000025293	protein_coding	1	0	0.475046	0.0116641	1	0	1.03777	1.03692e-05	1	0	1.24849	1.56807e-06	1
HSD17B6	ENSG00000025423	protein_coding	0	0	-0.078351	0.946209	0	0	0.00438002	0.998101	0	0	0.820507	0.548555	0
NR1H3	ENSG00000025434	protein_coding	0	0	0.361022	0.622471	0	0	-0.405533	0.632878	0	0	-0.511095	0.532542	0
TYMP	ENSG00000025708	protein_coding	0	0	0.550115	0.679679	0	0	-1.00335	0.398863	0	0	-1.45248	0.1216	0
NCAPH2	ENSG00000025770	protein_coding	0	0	0.126954	0.640386	0	0	0.0555122	0.891085	0	0	0.193265	0.580087	0
TOMM34	ENSG00000025772	protein_coding	0	0	0.437841	0.0742145	0	0	0.218919	0.550471	0	0	0.127855	0.747325	0
SEC63	ENSG00000025796	protein_coding	0	0	-0.140153	0.483162	0	0	0.365321	0.101467	0	0	0.857163	8.16967e-05	1
KPNA6	ENSG00000025800	protein_coding	0	0	0.0918984	0.607208	0	0	0.459039	0.00779808	1	0	0.185616	0.433241	0
VIM	ENSG00000026025	protein_coding	0	0	-0.470018	0.000878623	0	1	-0.279853	0.188647	0	0	0.384768	0.106053	0
RTEL1-TNFRSF6B	ENSG00000026036	protein_coding	0	0	-1.06261	NA	0	0	-1.52153	NA	0	0	-1.90766	0.203178	0
FAS	ENSG00000026103	protein_coding	0	0	0.309121	0.684524	0	0	0.395248	0.691927	0	0	1.14151	0.217638	0
RNASET2	ENSG00000026297	protein_coding	0	0	0.0968358	0.879138	0	0	-0.261385	0.722829	0	0	-0.699436	0.176799	0
CD44	ENSG00000026508	protein_coding	0	0	1.66621	NA	0	0	3.3953	NA	0	0	1.83782	NA	0
KCNG1	ENSG00000026559	protein_coding	0	0	0.304753	0.492587	0	0	-0.107656	0.873494	0	0	-0.33644	0.520226	0
AGPAT4	ENSG00000026652	protein_coding	0	0	-0.187436	0.571941	0	0	-0.280191	0.516177	0	0	-0.391088	0.327646	0
SLAMF7	ENSG00000026751	protein_coding	0	0	NA	NA	0	0	NA	NA	0	0	NA	NA	0
BTN3A1	ENSG00000026950	protein_coding	0	0	-0.30309	0.639658	0	0	-0.112041	0.921682	0	0	0.469294	0.653	0
MIPEP	ENSG00000027001	protein_coding	0	0	-0.457523	0.15434	0	0	0.287114	0.642091	0	0	0.683933	0.216525	0
PRKCH	ENSG00000027075	protein_coding	0	0	0.559224	0.338709	0	0	0.625168	0.446787	0	0	0.986677	0.249861	0
INSRR	ENSG00000027644	protein_coding	0	0	-0.398262	NA	0	0	-1.23596	NA	0	0	-0.993574	NA	0
IFNGR1	ENSG00000027697	protein_coding	0	0	0.354375	0.120128	0	0	1.13893	1.92219e-05	1	0	0.972623	0.000355493	1
B4GALT7	ENSG00000027847	protein_coding	0	0	0.147659	0.750148	0	0	-0.290694	0.606824	0	0	-0.888727	0.0234586	0
SH2D2A	ENSG00000027869	protein_coding	0	0	0.793165	0.297268	0	0	-0.0143463	0.99164	0	0	0.545037	0.594023	0
VRK2	ENSG00000028116	protein_coding	0	0	-0.472475	0.197952	0	0	0.094599	0.909136	0	0	0.396536	0.569781	0
TNFRSF1B	ENSG00000028137	protein_coding	0	0	0.619847	NA	0	0	-0.715667	NA	0	0	-0.159148	NA	0
VEZT	ENSG00000028203	protein_coding	0	0	0.163683	0.519877	0	0	0.789089	0.00138954	1	0	1.1041	3.55923e-05	1
POU2F2	ENSG00000028277	protein_coding	0	0	-0.283103	NA	0	0	-1.79824	NA	0	0	-1.51236	NA	0
BRD9	ENSG00000028310	protein_coding	0	0	0.447658	0.102073	0	0	0.298682	0.477689	0	0	0.12462	0.785595	0
SNX1	ENSG00000028528	protein_coding	0	0	0.0895575	0.753748	0	0	0.635916	0.0220174	1	0	0.609616	0.0404196	1
TBPL1	ENSG00000028839	protein_coding	0	0	-0.0273162	0.959911	0	0	0.355402	0.508898	0	0	0.700662	0.158531	0
ARNTL2	ENSG00000029153	protein_coding	0	0	-0.222302	0.5629	0	0	0.71404	0.124149	0	0	1.01152	0.0342404	1
BCLAF1	ENSG00000029363	protein_coding	0	0	-0.288901	0.00719783	0	0	0.50623	0.000626966	1	0	1.13835	1.04341e-14	1
SLC39A9	ENSG00000029364	protein_coding	0	0	0.021851	0.934558	0	0	0.397935	0.0939343	0	0	0.0518938	0.893982	0
ANK1	ENSG00000029534	protein_coding	0	0	0.127505	0.919176	0	0	-0.451176	0.722351	0	0	0.80612	0.578265	0
IBSP	ENSG00000029559	protein_coding	0	0	NA	NA	0	0	NA	NA	0	0	NA	NA	0
TFB1M	ENSG00000029639	protein_coding	0	0	0.310694	0.465948	0	0	0.248182	0.708926	0	0	0.56067	0.308844	0
RABEP1	ENSG00000029725	protein_coding	1	0	0.374665	0.00391677	1	0	0.957225	1.27412e-09	1	0	1.49495	1.64161e-16	1
HMGB3	ENSG00000029993	protein_coding	0	0	0.100525	0.580208	0	0	0.761685	3.013e-06	1	0	0.482751	0.0127825	1
NUP160	ENSG00000030066	protein_coding	1	0	0.449888	4.78198e-05	1	0	1.07241	2.14292e-14	1	0	1.38672	2.68685e-17	1
BAK1	ENSG00000030110	protein_coding	0	0	0.421423	0.284989	0	0	0.0778819	0.907775	0	0	0.161185	0.788282	0
MUSK	ENSG00000030304	protein_coding	0	0	0.619847	NA	0	0	-0.715667	NA	0	0	-2.39761	NA	0
IKZF2	ENSG00000030419	protein_coding	0	0	-0.727384	0.329918	0	0	-0.248936	0.873176	0	0	0.0370453	0.9841	0
GRN	ENSG00000030582	protein_coding	0	0	0.684737	9.51997e-05	1	0	-0.318744	0.160407	0	0	-0.359742	0.1217	0
FAM13B	ENSG00000031003	protein_coding	0	0	-0.439972	0.0713561	0	0	0.445516	0.255168	0	0	0.859519	0.0212721	1
ARHGAP31	ENSG00000031081	protein_coding	0	0	0.158201	0.841506	0	0	-0.442646	0.546552	0	0	-0.280451	0.728588	0
CENPQ	ENSG00000031691	protein_coding	0	0	-0.596278	0.0542124	0	0	0.466	0.449022	0	0	1.34082	0.0221441	1
SARS	ENSG00000031698	protein_coding	0	0	0.306242	0.0126168	1	0	0.301886	0.07145	0	0	0.603137	0.00057588	1
RANBP3	ENSG00000031823	protein_coding	0	0	0.344754	0.127617	0	0	0.13574	0.696459	0	0	0.282093	0.403478	0
ARID4A	ENSG00000032219	protein_coding	0	0	-0.00976672	0.982396	0	0	0.667848	0.0578456	0	0	1.16367	0.00165645	1
TSSC1	ENSG00000032389	protein_coding	0	0	0.529061	0.168468	0	0	0.0289293	0.969657	0	0	0.0531624	0.936328	0
PNPLA6	ENSG00000032444	protein_coding	0	0	0.474867	0.154692	0	0	-0.449453	0.259238	0	0	-0.351416	0.394441	0
IFT88	ENSG00000032742	protein_coding	0	0	-0.300992	0.597264	0	0	0.464932	0.602203	0	0	1.16876	0.160935	0
ALG1	ENSG00000033011	protein_coding	0	0	0.182408	0.696867	0	0	0.3768	0.500041	0	0	-0.105456	0.860037	0
ZCCHC8	ENSG00000033030	protein_coding	0	0	0.300366	0.269359	0	0	0.293169	0.455983	0	0	0.245826	0.534163	0
ABCF2	ENSG00000033050	protein_coding	0	0	0.271235	0.0611166	0	0	0.28982	0.149488	0	0	0.283804	0.186473	0
CHPF2	ENSG00000033100	protein_coding	0	0	-0.173712	0.585935	0	0	-0.304938	0.479598	0	0	-0.594452	0.0711497	0
LRRC7	ENSG00000033122	protein_coding	0	0	-1.48065	0.104075	0	0	-0.959026	NA	0	0	-0.470908	0.834317	0
FUT8	ENSG00000033170	protein_coding	0	0	-0.257642	0.363259	0	0	0.47035	0.240515	0	0	0.792174	0.0481582	1
UBA6	ENSG00000033178	protein_coding	0	0	-0.148593	0.522543	0	0	0.9942	7.5655e-07	1	0	1.46373	3.68144e-11	1
GAB2	ENSG00000033327	protein_coding	0	0	-0.149803	0.825642	0	0	-0.397091	0.606319	0	0	-0.518128	0.464498	0
ATP6V0A1	ENSG00000033627	protein_coding	0	0	0.0282073	0.916122	0	0	-0.00014444	0.999623	0	0	-0.334224	0.158502	0
PIAS1	ENSG00000033800	protein_coding	0	0	-0.287496	0.231152	0	0	-0.0603445	0.901204	0	0	0.15878	0.707352	0
SLC4A7	ENSG00000033867	protein_coding	0	0	-0.47064	0.00928946	0	1	0.76491	0.00898378	1	0	0.809206	0.0144863	1
APBA2	ENSG00000034053	protein_coding	0	0	0.888372	0.364906	0	0	0.600315	0.651019	0	0	1.58708	0.235183	0
MAP2K3	ENSG00000034152	protein_coding	0	0	0.473423	0.0881656	0	0	0.0596656	0.914728	0	0	0.252843	0.564177	0
EFCAB1	ENSG00000034239	protein_coding	0	0	-1.82281	NA	0	0	NA	NA	0	0	NA	NA	0
TMSB10	ENSG00000034510	protein_coding	0	1	-0.592198	2.16599e-05	0	1	-0.690791	4.48706e-05	0	1	-0.576517	0.00508533	0
ASTE1	ENSG00000034533	protein_coding	0	0	0.145649	0.811979	0	0	0.692977	0.305341	0	0	0.636131	0.361828	0
RNF19A	ENSG00000034677	protein_coding	0	0	-0.0522041	0.906511	0	0	0.71484	0.103821	0	0	1.01979	0.0201555	1
PEX3	ENSG00000034693	protein_coding	0	0	-0.184564	0.67405	0	0	0.176144	0.798981	0	0	0.29343	0.637946	0
GABARAPL2	ENSG00000034713	protein_coding	0	0	0.10233	0.723728	0	0	0.366726	0.251163	0	0	0.400571	0.224113	0
MYOC	ENSG00000034971	protein_coding	0	0	NA	NA	0	0	-2.24617	NA	0	0	-2.39584	NA	0
SH3YL1	ENSG00000035115	protein_coding	0	0	-0.719257	0.159793	0	0	-0.601675	0.468586	0	0	-1.09885	0.0831984	0
FAM136A	ENSG00000035141	protein_coding	0	0	-0.420411	0.0304519	0	1	-0.0505049	0.912434	0	0	0.361545	0.306764	0
VCL	ENSG00000035403	protein_coding	1	0	0.648486	1.63122e-08	1	0	0.489258	0.00152512	1	0	0.813615	2.39199e-06	1
DEPDC1B	ENSG00000035499	protein_coding	1	0	0.788061	0.00105966	1	0	1.24165	5.40733e-05	1	0	1.95131	5.61832e-08	1
DAPK2	ENSG00000035664	protein_coding	0	0	-0.0695896	0.964075	0	0	-0.537711	0.730707	0	0	-0.270885	0.877494	0
NSMAF	ENSG00000035681	protein_coding	0	0	-0.0872148	0.81655	0	0	0.301752	0.503787	0	0	0.636163	0.126695	0
ADSS	ENSG00000035687	protein_coding	0	0	0.00601975	0.985458	0	0	0.910344	4.16444e-05	1	0	1.04807	1.47149e-05	1
STAP1	ENSG00000035720	protein_coding	0	0	-0.621425	NA	0	0	-2.09276	NA	0	0	1.41952	NA	0
TIMP2	ENSG00000035862	protein_coding	0	0	0.404083	0.247141	0	0	0.312594	0.552066	0	0	0.371603	0.475462	0
RFC1	ENSG00000035928	protein_coding	1	0	0.378423	0.00322641	1	0	1.35025	1.08885e-16	1	0	1.72408	1.11533e-18	1
TBC1D23	ENSG00000036054	protein_coding	0	0	-0.273267	0.35617	0	0	0.351012	0.480564	0	0	1.23201	0.00207681	1
CUL3	ENSG00000036257	protein_coding	0	0	0.157125	0.480209	0	0	0.664682	0.00676263	1	0	1.01792	9.73335e-05	1
MYOM2	ENSG00000036448	protein_coding	0	0	2.61709	NA	0	0	2.14604	NA	0	0	2.9315	0.14753	0
OTC	ENSG00000036473	protein_coding	0	0	NA	NA	0	0	NA	NA	0	0	-2.39584	NA	0
CYP46A1	ENSG00000036530	protein_coding	0	0	-0.0509797	NA	0	0	-0.675755	NA	0	0	1.35702	NA	0
ZZZ3	ENSG00000036549	protein_coding	0	0	0.225666	0.217913	0	0	0.94176	8.50299e-07	1	0	1.51864	3.20979e-10	1
SLC18A1	ENSG00000036565	protein_coding	0	0	NA	NA	0	0	NA	NA	0	0	NA	NA	0
USP2	ENSG00000036672	protein_coding	0	0	0.211389	0.709901	0	0	-0.242047	0.721407	0	0	-0.063651	0.936311	0
CASR.1	ENSG00000036828	protein_coding	0	0	NA	NA	0	0	NA	NA	0	0	NA	NA	0
TUBG2	ENSG00000037042	protein_coding	0	0	0.480766	0.401347	0	0	-0.688905	0.25531	0	0	-0.877299	0.119161	0
RPL26L1	ENSG00000037241	protein_coding	0	0	-0.426321	0.0985491	0	0	-0.260947	0.573514	0	0	-0.248272	0.56636	0
FLT4	ENSG00000037280	protein_coding	0	0	0.358332	0.121804	0	0	-0.205745	0.544931	0	0	0.142989	0.705325	0
NSUN2	ENSG00000037474	protein_coding	1	0	0.528547	6.70349e-05	1	0	0.861642	7.75008e-07	1	0	1.17803	5.63791e-08	1
FBXO42	ENSG00000037637	protein_coding	0	0	0.319201	0.294186	0	0	0.428762	0.283376	0	0	0.239597	0.595393	0
MFAP3	ENSG00000037749	protein_coding	0	0	0.342279	0.262335	0	0	0.641393	0.145802	0	0	0.963566	0.0266009	1
MRI1	ENSG00000037757	protein_coding	0	0	-0.316261	0.214679	0	0	-0.350244	0.332248	0	0	-0.296058	0.436583	0
METTL1	ENSG00000037897	protein_coding	0	0	0.0148607	0.987153	0	0	-0.717918	0.281604	0	0	-0.777398	0.237089	0
HOXC8	ENSG00000037965	protein_coding	0	0	0.0199717	0.987203	0	0	-0.474941	0.707432	0	0	-0.660891	0.552092	0
AGA	ENSG00000038002	protein_coding	0	0	0.360403	0.451574	0	0	0.645578	0.312032	0	0	0.359176	0.59356	0
PI4K2B	ENSG00000038210	protein_coding	0	0	0.278086	0.49013	0	0	0.542539	0.300205	0	0	1.26212	0.0132315	1
BOD1L1	ENSG00000038219	protein_coding	0	0	0.0247967	0.943193	0	0	0.0162949	0.971112	0	0	0.537729	0.0577852	0
MAT2B	ENSG00000038274	protein_coding	0	0	-0.253315	0.229147	0	0	1.22695	3.77809e-07	1	0	1.62141	2.02648e-09	1
TLL1	ENSG00000038295	protein_coding	0	0	-0.392882	0.734047	0	0	0.602795	NA	0	0	-0.185098	0.917899	0
EDC4	ENSG00000038358	protein_coding	0	0	0.223496	0.343904	0	0	-0.0587085	0.881258	0	0	-0.104608	0.757751	0
TRIO	ENSG00000038382	protein_coding	0	0	0.224241	0.285511	0	0	0.340117	0.143572	0	0	0.514419	0.0470102	1
VCAN	ENSG00000038427	protein_coding	0	0	0.252459	0.190254	0	0	0.550154	0.0100336	1	0	1.0551	4.75946e-06	1
CLEC16A	ENSG00000038532	protein_coding	0	0	0.368164	0.201234	0	0	-0.0430697	0.938927	0	0	0.213078	0.629783	0
MSR1	ENSG00000038945	protein_coding	0	0	NA	NA	0	0	NA	NA	0	0	NA	NA	0
CDH1	ENSG00000039068	protein_coding	0	0	1.40643	0.0679529	0	0	0.608281	0.609119	0	0	0.875843	0.453272	0
SKIV2L2	ENSG00000039123	protein_coding	0	0	0.117311	0.528207	0	0	0.987071	2.93508e-08	1	0	1.29282	4.70055e-11	1
DNAH5	ENSG00000039139	protein_coding	0	0	1.68124	NA	0	0	0.322405	NA	0	0	1.69171	NA	0
ZFYVE16	ENSG00000039319	protein_coding	0	0	-0.115069	0.660276	0	0	0.875211	0.000862614	1	0	1.56838	1.00618e-07	1
FAM65A	ENSG00000039523	protein_coding	0	0	-0.262501	NA	0	0	-1.18066	0.415356	0	0	-0.369202	0.851912	0
C6	ENSG00000039537	protein_coding	0	0	NA	NA	0	0	NA	NA	0	0	NA	NA	0
RAI14	ENSG00000039560	protein_coding	0	0	0.164572	0.43892	0	0	1.05405	3.56799e-06	1	0	0.704333	0.0042633	1
SOX30	ENSG00000039600	protein_coding	0	0	-0.379048	NA	0	0	0.587413	NA	0	0	-0.954976	NA	0
PNKP	ENSG00000039650	protein_coding	0	0	-0.138147	0.754191	0	0	-0.409123	0.433096	0	0	-0.374688	0.456545	0
BEST2	ENSG00000039987	protein_coding	0	0	-0.0548494	NA	0	0	-1.39843	NA	0	0	-1.12565	NA	0
PHLPP2	ENSG00000040199	protein_coding	0	0	-0.117425	0.776169	0	0	0.111983	0.852948	0	0	0.577777	0.204282	0
SPDL1	ENSG00000040275	protein_coding	0	0	-0.12352	0.544384	0	0	0.52087	0.0153642	1	0	1.13724	4.73313e-07	1
STAU2	ENSG00000040341	protein_coding	0	0	-0.24134	0.519417	0	0	0.1148	0.865011	0	0	0.487838	0.344015	0
PQLC2	ENSG00000040487	protein_coding	0	0	0.208087	0.711284	0	0	-0.310441	0.631451	0	0	-0.420506	0.477038	0
CTNS	ENSG00000040531	protein_coding	0	0	-0.0500622	0.927642	0	0	-0.543436	0.241461	0	0	-1.04381	0.00498921	0
RTN4R	ENSG00000040608	protein_coding	0	0	0.264287	0.812316	0	0	0.00402796	0.998191	0	0	0.152974	0.921808	0
PHF23	ENSG00000040633	protein_coding	1	0	0.708164	0.000252694	1	0	0.617284	0.0262319	1	0	0.625818	0.0405486	1
CDH10	ENSG00000040731	protein_coding	0	0	0.981089	NA	0	0	0.596672	NA	0	0	3.4207	NA	0
INPP4A	ENSG00000040933	protein_coding	0	0	0.480369	0.0212629	1	0	0.273088	0.377709	0	0	0.480994	0.105759	0
RAB27B	ENSG00000041353	protein_coding	0	0	-0.804237	NA	0	0	1.50679	NA	0	0	0.292486	NA	0
PSMA4	ENSG00000041357	protein_coding	0	0	-0.693892	1.95382e-09	0	1	0.354718	0.0553335	0	0	0.833208	9.96855e-06	1
MYO16	ENSG00000041515	protein_coding	0	0	NA	NA	0	0	NA	NA	0	0	-2.39584	NA	0
LSG1	ENSG00000041802	protein_coding	0	0	0.316419	0.280464	0	0	0.660416	0.0634496	0	0	0.526985	0.171587	0
PARP3	ENSG00000041880	protein_coding	0	0	-0.814766	0.246137	0	0	-1.10337	0.248767	0	0	-0.615383	0.591621	0
TNC	ENSG00000041982	protein_coding	0	0	-0.162277	0.864104	0	0	0.299181	0.830961	0	0	0.35983	0.783662	0
THAP3	ENSG00000041988	protein_coding	0	0	0.0425404	0.962345	0	0	-0.106134	0.921492	0	0	0.0168616	0.987423	0
FAM65C	ENSG00000042062	protein_coding	0	0	-0.220036	NA	0	0	-1.73732	0.09244	0	0	-1.91832	0.0532328	0
TDP1	ENSG00000042088	protein_coding	0	0	-0.0995981	0.795192	0	0	0.159196	0.761966	0	0	0.127881	0.808805	0
AIFM2	ENSG00000042286	protein_coding	0	0	0.734402	0.400852	0	0	-0.31802	0.783183	0	0	-0.558017	0.550569	0
C2orf83	ENSG00000042304	protein_coding	0	0	1.33964	NA	0	0	-1.70139	NA	0	0	1.42184	NA	0
SPATA7	ENSG00000042317	protein_coding	0	0	0.227445	0.745825	0	0	0.593658	0.491807	0	0	0.535943	0.535576	0
MED17	ENSG00000042429	protein_coding	0	0	-0.132264	0.648824	0	0	0.521307	0.116485	0	0	0.703443	0.0325721	1
RETSAT	ENSG00000042445	protein_coding	0	0	0.237796	0.547775	0	0	-0.370716	0.370688	0	0	-0.570732	0.121509	0
CAPG	ENSG00000042493	protein_coding	0	0	0.424542	0.692405	0	0	-0.391113	0.747126	0	0	-0.809896	0.394441	0
AP2S1	ENSG00000042753	protein_coding	0	0	0.0102546	0.981266	0	0	-1.00288	1.01871e-05	0	1	-0.878313	0.000679766	0
USH2A	ENSG00000042781	protein_coding	0	0	-1.18442	NA	0	0	-1.69362	NA	0	0	-2.07438	NA	0
ZPBP	ENSG00000042813	protein_coding	0	0	NA	NA	0	0	NA	NA	0	0	NA	NA	0
TG	ENSG00000042832	protein_coding	0	0	0.340692	NA	0	0	-2.93465	NA	0	0	-3.31591	NA	0
ADAM28	ENSG00000042980	protein_coding	0	0	NA	NA	0	0	NA	NA	0	0	NA	NA	0
BARX2	ENSG00000043039	protein_coding	0	0	-0.0495872	0.964075	0	0	0.63036	0.585043	0	0	0.857663	0.441863	0
DCUN1D1	ENSG00000043093	protein_coding	0	0	-0.563669	0.0218734	0	1	0.518374	0.21214	0	0	1.13971	0.00642769	1
JADE2	ENSG00000043143	protein_coding	0	0	0.830663	0.0764221	0	0	0.643776	0.305045	0	0	0.525522	0.443531	0
ZIC2	ENSG00000043355	protein_coding	0	0	0.798411	2.38654e-06	1	0	0.742801	0.000163773	1	0	0.406703	0.0790171	0
LCP2	ENSG00000043462	protein_coding	0	0	NA	NA	0	0	NA	NA	0	0	NA	NA	0
TRIT1	ENSG00000043514	protein_coding	0	0	-0.310469	0.310939	0	0	0.140783	0.81442	0	0	0.636353	0.178789	0
ADRB1	ENSG00000043591	protein_coding	0	0	0.524859	NA	0	0	0.897121	NA	0	0	0.990173	0.606658	0
GUCA2B	ENSG00000044012	protein_coding	0	0	NA	NA	0	0	NA	NA	0	0	-2.64947	NA	0
CUL7	ENSG00000044090	protein_coding	0	0	0.157825	0.624113	0	0	-0.197712	0.637439	0	0	-0.0447196	0.931938	0
CTNNA1	ENSG00000044115	protein_coding	1	0	0.544358	2.42617e-06	1	0	0.998258	9.16158e-12	1	0	1.362	7.05671e-16	1
PHKA2	ENSG00000044446	protein_coding	0	0	0.32056	0.215789	0	0	0.10555	0.821928	0	0	-0.09598	0.824266	0
CNTLN	ENSG00000044459	protein_coding	0	0	-0.439075	0.143774	0	0	0.232162	0.697232	0	0	-0.00827592	0.990921	0
EPHA3	ENSG00000044524	protein_coding	0	0	0.256035	0.569367	0	0	1.00354	0.0226434	1	0	1.61064	0.000719191	1
HSPA5	ENSG00000044574	protein_coding	0	0	0.238694	0.0407221	0	0	0.830832	3.97144e-11	1	0	0.965158	2.04625e-10	1
DSG2	ENSG00000046604	protein_coding	1	0	0.375687	0.00143476	1	0	0.973227	8.78045e-13	1	0	1.74105	6.13884e-27	1
GEMIN8	ENSG00000046647	protein_coding	0	0	-0.022541	0.979948	0	0	-0.474212	0.549686	0	0	-0.383372	0.651423	0
OFD1	ENSG00000046651	protein_coding	0	0	-0.565879	0.0179875	0	1	-0.195623	0.651019	0	0	0.316802	0.463159	0
GPM6B	ENSG00000046653	protein_coding	0	0	-0.676142	0.0171936	0	1	-0.0733281	0.921655	0	0	-0.033802	0.965133	0
MAGEC2	ENSG00000046774	protein_coding	0	0	-1.82281	NA	0	0	NA	NA	0	0	NA	NA	0
PREX2	ENSG00000046889	protein_coding	0	0	-0.156557	0.810663	0	0	0.204294	0.821837	0	0	0.0628575	0.946458	0
WDR37	ENSG00000047056	protein_coding	0	0	0.732476	0.00239045	1	0	0.683581	0.0392469	1	0	0.606499	0.0872276	0
YTHDC2	ENSG00000047188	protein_coding	0	0	0.13885	0.548497	0	0	1.0644	2.21089e-09	1	0	1.30213	8.71298e-11	1
CTPS2	ENSG00000047230	protein_coding	0	0	0.138806	0.657162	0	0	0.828639	0.00606604	1	0	0.695466	0.030201	1
ATP6V1H	ENSG00000047249	protein_coding	0	0	0.232096	0.412539	0	0	0.889883	0.00225093	1	0	0.844422	0.00942127	1
POLR2B	ENSG00000047315	protein_coding	0	0	0.23034	0.0407221	0	0	1.4633	1.67276e-24	1	0	1.93616	8.67459e-35	1
FAM214A	ENSG00000047346	protein_coding	0	0	0.152789	0.810987	0	0	0.182764	0.843318	0	0	0.698632	0.347566	0
ARAP2	ENSG00000047365	protein_coding	0	0	-0.747213	0.0843073	0	0	0.601323	0.513448	0	0	0.54679	0.543144	0
TPR	ENSG00000047410	protein_coding	0	0	0.0244077	0.917236	0	0	0.496365	0.00100301	1	0	1.07521	3.11705e-12	1
CP	ENSG00000047457	protein_coding	0	0	-1.96168	NA	0	0	-2.46329	NA	0	0	-1.73196	NA	0
KIAA0556	ENSG00000047578	protein_coding	0	0	0.407497	0.256227	0	0	0.087083	0.894806	0	0	0.0769949	0.905554	0
DTNBP1	ENSG00000047579	protein_coding	0	0	0.177682	0.749965	0	0	0.230131	0.754541	0	0	0.29544	0.668339	0
XK	ENSG00000047597	protein_coding	0	0	-0.0475613	0.964075	0	0	0.419178	0.743972	0	0	-0.0613057	0.965129	0
ANO2	ENSG00000047617	protein_coding	0	0	0.619848	NA	0	0	-1.39879	NA	0	0	0.0409257	NA	0
C12orf4	ENSG00000047621	protein_coding	0	0	-0.41289	0.112584	0	0	0.530824	0.196851	0	0	0.757008	0.0843972	0
SCML1	ENSG00000047634	protein_coding	0	0	0.166763	0.477678	0	0	0.529217	0.035061	1	0	0.882823	0.00517064	1
WWC3	ENSG00000047644	protein_coding	0	0	-0.75151	NA	0	0	1.58662	NA	0	0	-2.61469	NA	0
ARHGAP6	ENSG00000047648	protein_coding	0	0	-3.09407	NA	0	0	-4.94148	NA	0	0	-3.82974	NA	0
FAM184B	ENSG00000047662	protein_coding	0	0	0.899006	NA	0	0	-1.44621	NA	0	0	-1.39954	0.393841	0
MAP4	ENSG00000047849	protein_coding	0	0	0.240985	0.146601	0	0	0.413697	0.0105816	1	0	0.472309	0.00809613	1
GOPC	ENSG00000047932	protein_coding	0	0	0.141692	0.532426	0	0	1.0496	3.83944e-06	1	0	1.54256	2.14687e-09	1
ROS1	ENSG00000047936	protein_coding	0	0	NA	NA	0	0	NA	NA	0	0	NA	NA	0
USP28	ENSG00000048028	protein_coding	0	0	-0.0850487	0.771809	0	0	0.593843	0.0461555	1	0	0.939915	0.000948117	1
HDAC9	ENSG00000048052	protein_coding	0	0	0.750239	0.325653	0	0	0.435149	0.70088	0	0	0.356584	0.756503	0
TSPAN17	ENSG00000048140	protein_coding	0	0	0.178107	0.598924	0	0	0.377176	0.328298	0	0	-0.424494	0.206455	0
NOP16	ENSG00000048162	protein_coding	0	0	-0.303006	0.379975	0	0	-0.232717	0.663541	0	0	0.0440405	0.947654	0
CC2D2A	ENSG00000048342	protein_coding	0	0	0.350233	0.446875	0	0	0.186571	0.795136	0	0	0.434374	0.473843	0
RRM2B	ENSG00000048392	protein_coding	0	0	0.0676055	0.840722	0	0	1.53817	1.32492e-08	1	0	2.08735	2.28038e-11	1
ZNF800	ENSG00000048405	protein_coding	0	0	-0.600567	0.0267738	0	1	0.155704	0.792652	0	0	0.248822	0.650502	0
TNFRSF17	ENSG00000048462	protein_coding	0	0	-3.40375	NA	0	0	-1.70458	NA	0	0	-3.03522	NA	0
SNX29	ENSG00000048471	protein_coding	0	0	0.574383	0.0721475	0	0	0.969029	0.0210213	1	0	1.00125	0.0252298	1
LMO3	ENSG00000048540	protein_coding	0	0	0.191941	NA	0	0	2.91038	NA	0	0	0.476151	NA	0
MRPS10	ENSG00000048544	protein_coding	0	0	-0.46694	0.061366	0	0	0.578284	0.157402	0	0	0.865157	0.0333024	1
GUCA1A	ENSG00000048545	protein_coding	0	0	-1.82281	NA	0	0	-2.24617	NA	0	0	-5.52657	NA	0
RSF1	ENSG00000048649	protein_coding	0	0	-0.0372744	0.890694	0	0	0.706177	0.000196163	1	0	0.901641	1.63006e-05	1
VPS13D	ENSG00000048707	protein_coding	0	0	-0.143622	0.639965	0	0	-0.00822559	0.987263	0	0	0.139036	0.734418	0
CELF2	ENSG00000048740	protein_coding	0	0	-1.32876	1.93368e-05	0	1	0.0713837	0.949112	0	0	0.0545591	0.957503	0
FAM120A	ENSG00000048828	protein_coding	0	0	0.300305	0.0425733	1	0	0.246232	0.243383	0	0	0.669862	0.000780668	1
R3HDM1	ENSG00000048991	protein_coding	0	0	-0.196103	0.426081	0	0	-0.218101	0.52054	0	0	-0.0409256	0.927195	0
COL9A2	ENSG00000049089	protein_coding	0	0	1.06973	0.331417	0	0	-0.373126	0.786714	0	0	-0.0752327	0.964492	0
KITLG	ENSG00000049130	protein_coding	0	0	-0.233277	0.551352	0	0	0.691875	0.191161	0	0	1.17268	0.0352944	1
ERCC8	ENSG00000049167	protein_coding	0	0	-0.727511	0.0467597	0	1	0.014141	0.988539	0	0	0.564361	0.452343	0
ADAMTS6	ENSG00000049192	protein_coding	0	0	-0.327912	0.702877	0	0	-0.373775	0.744273	0	0	0.0150994	0.99147	0
H6PD	ENSG00000049239	protein_coding	0	0	0.264415	0.4711	0	0	-0.137763	0.782715	0	0	0.0284473	0.961916	0
VAMP3	ENSG00000049245	protein_coding	0	0	-0.738537	4.6439e-05	0	1	0.0545109	0.91608	0	0	0.615125	0.0929756	0
PER3	ENSG00000049246	protein_coding	0	0	0.537491	0.604339	0	0	-0.143251	0.92791	0	0	0.0189742	0.990785	0
UTS2	ENSG00000049247	protein_coding	0	0	-1.82281	NA	0	0	NA	NA	0	0	NA	NA	0
TNFRSF9	ENSG00000049249	protein_coding	0	0	-0.464173	NA	0	0	-0.413199	NA	0	0	-0.448997	NA	0
EPN3	ENSG00000049283	protein_coding	0	0	1.75584	NA	0	0	-0.72289	NA	0	0	-0.0306447	NA	0
LTBP1	ENSG00000049323	protein_coding	1	0	0.545998	0.0218058	1	0	0.890811	0.00152158	1	0	0.943063	0.00225052	1
RCN1	ENSG00000049449	protein_coding	1	0	0.534756	6.30068e-05	1	0	0.662527	0.00010898	1	0	1.14178	1.62731e-08	1
ELN	ENSG00000049540	protein_coding	0	0	0.340692	NA	0	0	-0.970611	NA	0	0	0.421613	NA	0
RFC2	ENSG00000049541	protein_coding	0	0	-0.155546	0.53473	0	0	-0.00348523	0.993835	0	0	0.227287	0.500676	0
ARID1B	ENSG00000049618	protein_coding	0	0	0.390865	0.0142227	1	0	0.136778	0.610899	0	0	0.0111164	0.973925	0
CLPTM1L	ENSG00000049656	protein_coding	0	0	0.087135	0.866271	0	0	0.0781691	0.918023	0	0	0.658713	0.248852	0
NEDD4L	ENSG00000049759	protein_coding	0	0	0.112742	0.811979	0	0	0.295366	0.627807	0	0	0.396103	0.481072	0
FOXP3	ENSG00000049768	protein_coding	0	0	-1.14077	NA	0	0	-0.982318	NA	0	0	-0.679619	NA	0
PPP1R3F	ENSG00000049769	protein_coding	0	0	0.734155	0.264781	0	0	0.291096	0.779157	0	0	-0.1741	0.854979	0
HEXB	ENSG00000049860	protein_coding	0	0	0.0463279	0.890701	0	0	0.268005	0.445382	0	0	0.41112	0.219304	0
PTCD2	ENSG00000049883	protein_coding	0	0	-0.254038	0.483597	0	0	-0.469885	0.285252	0	0	-0.671399	0.0997759	0
KIAA2022	ENSG00000050030	protein_coding	0	0	-0.180874	0.884014	0	0	-0.153061	0.934337	0	0	0.385366	0.821311	0
JKAMP	ENSG00000050130	protein_coding	0	0	-0.117524	0.781493	0	0	0.385456	0.453456	0	0	0.546213	0.286183	0
DKK3	ENSG00000050165	protein_coding	0	0	0.369594	0.735172	0	0	-0.0185644	0.991876	0	0	-0.429731	0.723853	0
ARHGEF5	ENSG00000050327	protein_coding	0	0	NA	NA	0	0	NA	NA	0	0	NA	NA	0
NFE2L3	ENSG00000050344	protein_coding	0	0	0.0489163	0.922186	0	0	-0.0700227	0.915986	0	0	-0.235774	0.704117	0
MCUR1	ENSG00000050393	protein_coding	0	0	-0.2019	0.477031	0	0	0.224482	0.609119	0	0	-0.0526368	0.918257	0
LIMA1	ENSG00000050405	protein_coding	0	0	0.325197	0.111601	0	0	1.09421	5.52458e-06	1	0	1.2231	3.25346e-06	1
LETMD1	ENSG00000050426	protein_coding	0	0	-0.307424	0.270835	0	0	-0.205385	0.591005	0	0	-0.94937	0.000176201	0
SLC4A8	ENSG00000050438	protein_coding	0	0	-0.448227	0.640386	0	0	-0.350502	0.818023	0	0	-0.890582	0.407254	0
LAMC3	ENSG00000050555	protein_coding	0	0	0.608714	0.216939	0	0	-0.388132	0.538932	0	0	-0.514395	0.373697	0
PTGER3	ENSG00000050628	protein_coding	0	0	-0.0639947	NA	0	0	-0.95103	NA	0	0	-1.77886	0.167568	0
TNIP3	ENSG00000050730	protein_coding	0	0	2.66218	NA	0	0	2.91038	NA	0	0	1.35702	NA	0
MAPK9	ENSG00000050748	protein_coding	0	0	-0.324951	0.0943882	0	0	0.200024	0.563149	0	0	0.12926	0.726426	0
COL23A1	ENSG00000050767	protein_coding	0	0	1.06511	0.212329	0	0	0.844945	0.486692	0	0	-0.305861	0.784618	0
BCAR1	ENSG00000050820	protein_coding	0	0	1.07537	6.43637e-06	1	0	0.330279	0.346503	0	0	0.286703	0.460314	0
FAM160A2	ENSG00000051009	protein_coding	0	0	0.344296	0.325003	0	0	0.207312	0.673689	0	0	-0.614777	0.0633695	0
HERPUD1	ENSG00000051108	protein_coding	0	0	0.337493	0.0985466	0	0	0.00431595	0.992123	0	0	0.495458	0.0734745	0
HOMER3	ENSG00000051128	protein_coding	0	0	0.77134	0.421891	0	0	-0.0710435	0.966352	0	0	-0.261648	0.838114	0
RAD51	ENSG00000051180	protein_coding	0	0	0.106392	0.834022	0	0	0.177644	0.793568	0	0	0.0942666	0.887429	0
POLQ	ENSG00000051341	protein_coding	0	0	-0.277892	0.133812	0	0	0.162946	0.604976	0	0	0.476272	0.0857732	0
PIK3CB	ENSG00000051382	protein_coding	0	0	-0.450641	0.121872	0	0	0.267358	0.630113	0	0	0.72186	0.157239	0
CYBA	ENSG00000051523	protein_coding	0	0	0.414369	0.144277	0	0	-0.918507	0.000114354	0	1	-0.978552	0.00011753	0
THOC3	ENSG00000051596	protein_coding	0	0	0.477802	0.00722422	1	0	0.457696	0.053489	0	0	0.189717	0.517809	0
HEBP2	ENSG00000051620	protein_coding	0	0	0.00189706	0.996038	0	0	-0.204099	0.562292	0	0	-0.0732424	0.856152	0
MPHOSPH9	ENSG00000051825	protein_coding	0	0	-0.441916	0.00451201	0	1	0.177185	0.585231	0	0	0.421102	0.133095	0
PLEKHA5	ENSG00000052126	protein_coding	0	0	0.096992	0.777063	0	0	0.581628	0.0965394	0	0	1.27248	0.00056837	1
PRSS8	ENSG00000052344	protein_coding	0	0	2.20481	NA	0	0	-0.906002	NA	0	0	-0.653399	NA	0
SIKE1	ENSG00000052723	protein_coding	0	0	-0.537936	0.000193029	0	1	0.509645	0.0364481	1	0	0.784043	0.00330853	1
RRP12	ENSG00000052749	protein_coding	0	0	0.652074	0.000227377	1	0	0.53225	0.0246219	1	0	0.465707	0.0804951	0
FNIP2	ENSG00000052795	protein_coding	0	0	0.345935	0.193473	0	0	0.92167	0.0062862	1	0	0.851193	0.0192411	1
MSMO1	ENSG00000052802	protein_coding	0	0	-0.77163	0.00117926	0	1	0.377595	0.512186	0	0	0.569597	0.268244	0
TTC17	ENSG00000052841	protein_coding	0	0	0.00722543	0.98278	0	0	0.149361	0.661965	0	0	0.249235	0.46156	0
ALX4	ENSG00000052850	protein_coding	0	0	0.886471	0.00306677	1	0	0.576449	0.157738	0	0	0.434429	0.352026	0
FSTL4	ENSG00000053108	protein_coding	0	0	-2.38167	NA	0	0	-1.81262	NA	0	0	-1.80959	NA	0
FOXN3	ENSG00000053254	protein_coding	0	0	0.0558479	0.881182	0	0	0.0701203	0.890474	0	0	0.365778	0.347113	0
METTL24	ENSG00000053328	protein_coding	0	0	0.474192	NA	0	0	1.43042	NA	0	0	0.661352	NA	0
AKR7A2	ENSG00000053371	protein_coding	0	0	0.334497	0.198794	0	0	-0.0796151	0.877452	0	0	0.183123	0.656292	0
MRTO4	ENSG00000053372	protein_coding	0	0	-0.14885	0.559776	0	0	0.293598	0.387217	0	0	0.52773	0.093599	0
NNAT	ENSG00000053438	protein_coding	0	0	-0.485505	NA	0	0	-1.1595	NA	0	0	-2.0573	0.187661	0
USE1	ENSG00000053501	protein_coding	0	0	-0.0544149	0.953028	0	0	-0.552868	0.459817	0	0	-0.549427	0.454897	0
MCF2L2	ENSG00000053524	protein_coding	0	0	0.818056	0.485991	0	0	0.334377	0.850588	0	0	-0.392617	0.774935	0
NRIP2	ENSG00000053702	protein_coding	0	0	-0.330528	0.819898	0	0	-0.00808506	NA	0	0	-0.878813	0.555211	0
LAMA3	ENSG00000053747	protein_coding	0	0	-0.420005	0.118869	0	0	-0.493591	0.179339	0	0	-0.347478	0.410806	0
AP5M1	ENSG00000053770	protein_coding	0	0	-0.410687	0.109869	0	0	0.154243	0.774275	0	0	0.640803	0.118338	0
ANAPC4	ENSG00000053900	protein_coding	0	0	-0.556255	0.0243384	0	1	0.405248	0.407347	0	0	0.455984	0.348208	0
KCNQ1	ENSG00000053918	protein_coding	0	0	0.374854	NA	0	0	-0.619647	NA	0	0	-0.839252	0.608734	0
TRAPPC3	ENSG00000054116	protein_coding	0	0	-0.259246	0.356677	0	0	-0.123658	0.812791	0	0	0.548301	0.192378	0
THRAP3	ENSG00000054118	protein_coding	1	0	0.533394	4.0958e-08	1	0	1.04038	8.48661e-17	1	0	1.22885	4.4257e-17	1
PHPT1	ENSG00000054148	protein_coding	0	0	-0.193534	0.639658	0	0	-0.467185	0.287985	0	0	-0.567235	0.209373	0
ENTPD2	ENSG00000054179	protein_coding	0	0	0.882259	NA	0	0	-0.275232	NA	0	0	-1.33821	NA	0
LY75	ENSG00000054219	protein_coding	0	0	0.342383	NA	0	0	-0.805618	NA	0	0	-2.03505	NA	0
ARID4B	ENSG00000054267	protein_coding	0	0	0.0948527	0.738051	0	0	0.839568	2.27007e-05	1	0	1.37905	5.93787e-10	1
OPN3	ENSG00000054277	protein_coding	0	0	-1.6275	NA	0	0	0.776833	NA	0	0	-1.73054	NA	0
SDCCAG8	ENSG00000054282	protein_coding	0	0	-0.223146	NA	0	0	-0.957135	0.598779	0	0	-0.63586	0.737219	0
PTPRN	ENSG00000054356	protein_coding	0	0	NA	NA	0	0	NA	NA	0	0	NA	NA	0
HHAT	ENSG00000054392	protein_coding	0	0	1.24527	NA	0	0	-0.4688	NA	0	0	0.292956	NA	0
KIF1B	ENSG00000054523	protein_coding	0	0	-0.0189448	0.941922	0	0	0.519779	0.012426	1	0	0.63639	0.00529653	1
FOXC1	ENSG00000054598	protein_coding	0	0	0.61499	1.63971e-07	1	0	0.304211	0.0682114	0	0	0.188638	0.363839	0
TBC1D22A	ENSG00000054611	protein_coding	0	0	0.265621	0.553924	0	0	0.0891852	0.901561	0	0	0.0818016	0.903516	0
SYNE2	ENSG00000054654	protein_coding	0	0	-0.0836083	0.725687	0	0	0.403752	0.0791398	0	0	0.855379	0.000234569	1
PLEKHH1	ENSG00000054690	protein_coding	0	0	0.150831	0.709433	0	0	-0.134127	0.808568	0	0	-0.236459	0.619784	0
ATP9A	ENSG00000054793	protein_coding	0	0	0.316173	0.163826	0	0	0.732033	0.019647	1	0	0.561487	0.0739043	0
SPO11	ENSG00000054796	protein_coding	0	0	NA	NA	0	0	NA	NA	0	0	NA	NA	0
CBLN4	ENSG00000054803	protein_coding	0	0	NA	NA	0	0	NA	NA	0	0	NA	NA	0
CHRDL2	ENSG00000054938	protein_coding	0	0	-1.66757	NA	0	0	-2.78604	NA	0	0	-3.98387	NA	0
FAM168A	ENSG00000054965	protein_coding	0	0	0.514921	0.0528447	0	0	0.300537	0.367047	0	0	0.293775	0.409969	0
RELT	ENSG00000054967	protein_coding	0	0	0.126923	0.876482	0	0	-0.808867	0.180078	0	0	-1.52996	0.000837233	0
GALC	ENSG00000054983	protein_coding	0	0	0.516381	0.533854	0	0	1.18793	0.265737	0	0	2.30876	0.0519768	0
NOP58	ENSG00000055044	protein_coding	0	0	-0.431446	0.00104987	0	1	0.215808	0.369077	0	0	0.468336	0.0351755	1
SZRD1	ENSG00000055070	protein_coding	0	0	0.176546	0.46091	0	0	0.46845	0.0634791	0	0	0.819347	0.00151094	1
KCNH2	ENSG00000055118	protein_coding	0	0	-0.864951	0.325228	0	0	-0.427315	0.799471	0	0	-0.606277	0.678596	0
CUL1	ENSG00000055130	protein_coding	1	0	0.513255	4.24849e-05	1	0	0.877661	1.44089e-07	1	0	1.3958	3.10787e-14	1
FAM114A2	ENSG00000055147	protein_coding	0	0	-0.158292	0.617547	0	0	0.887418	0.0167707	1	0	1.63256	5.93461e-05	1
CYFIP2	ENSG00000055163	protein_coding	0	0	-0.118619	0.725414	0	0	-0.23965	0.497472	0	0	0.00874789	0.986717	0
TAB2	ENSG00000055208	protein_coding	0	0	0.104072	0.667151	0	0	0.235461	0.396292	0	0	0.547694	0.0331688	1
GINM1	ENSG00000055211	protein_coding	0	0	-0.161205	0.654811	0	0	0.176406	0.745565	0	0	0.832521	0.0644934	0
EIF2AK2	ENSG00000055332	protein_coding	0	0	-0.598961	0.000105465	0	1	0.235466	0.485073	0	0	0.613448	0.0478374	1
USP36	ENSG00000055483	protein_coding	0	0	0.531363	0.0070555	1	0	-0.255046	0.343459	0	0	-0.0483821	0.895987	0
KMT2C	ENSG00000055609	protein_coding	0	0	-0.25726	0.105449	0	0	-0.295106	0.14428	0	0	-0.0468436	0.880428	0
MCOLN3	ENSG00000055732	protein_coding	0	0	-0.665012	0.111834	0	0	-0.184746	0.842131	0	0	-0.458479	0.527126	0
CCDC85A	ENSG00000055813	protein_coding	0	0	1.62056	NA	0	0	0.27411	NA	0	0	0.86231	NA	0
PUM2	ENSG00000055917	protein_coding	0	0	0.212322	0.186824	0	0	1.37206	4.71581e-17	1	0	1.88935	2.83362e-23	1
MRPL43	ENSG00000055950	protein_coding	0	0	-0.328908	0.192562	0	0	-0.165803	0.711821	0	0	-0.341189	0.379994	0
ITIH4	ENSG00000055955	protein_coding	0	0	0.342383	NA	0	0	0.587413	NA	0	0	-3.31657	NA	0
ITIH1	ENSG00000055957	protein_coding	0	0	0.342383	NA	0	0	0.587413	NA	0	0	-2.55184	NA	0
HPF1	ENSG00000056050	protein_coding	0	0	-0.0285942	0.957805	0	0	0.0792493	0.907472	0	0	0.538221	0.298352	0
ZFR	ENSG00000056097	protein_coding	0	0	0.171052	0.342694	0	0	0.70892	3.96537e-05	1	0	1.2132	1.51904e-09	1
ZNF280C	ENSG00000056277	protein_coding	0	0	-0.433964	0.0399418	0	1	-0.121932	0.782655	0	0	-0.294641	0.434359	0
NPFFR2	ENSG00000056291	protein_coding	0	0	0.538902	NA	0	0	1.66085	NA	0	0	1.61698	NA	0
PHF21B	ENSG00000056487	protein_coding	0	0	0.853376	0.0580585	0	0	0.154393	0.845791	0	0	0.121367	0.872573	0
TRAF1	ENSG00000056558	protein_coding	0	0	0.685122	NA	0	0	-0.802585	0.583024	0	0	-0.544567	0.74039	0
RC3H2	ENSG00000056586	protein_coding	0	0	-0.166233	0.371275	0	0	0.35774	0.119929	0	0	0.810708	0.000574242	1
IL17RB	ENSG00000056736	protein_coding	0	0	-0.220008	0.723728	0	0	-0.360144	0.647733	0	0	-0.31311	0.694244	0
TRAF3IP2	ENSG00000056972	protein_coding	0	0	0.0589811	0.945058	0	0	-0.189735	0.843509	0	0	-0.485365	0.518728	0
GYG2	ENSG00000056998	protein_coding	0	0	0.410502	0.183751	0	0	0.153314	0.761647	0	0	0.266808	0.575871	0
DCBLD2	ENSG00000057019	protein_coding	0	0	-0.081917	0.747166	0	0	0.728436	0.00422083	1	0	0.714484	0.0103121	1
SERPINB3	ENSG00000057149	protein_coding	0	0	NA	NA	0	0	NA	NA	0	0	NA	NA	0
SOAT1	ENSG00000057252	protein_coding	0	0	-0.0503399	0.849478	0	0	1.02711	5.77534e-06	1	0	0.119515	0.761306	0
PKP2	ENSG00000057294	protein_coding	0	0	0.0736391	0.889426	0	0	0.481372	0.385218	0	0	0.873492	0.115344	0
MSH4	ENSG00000057468	protein_coding	0	0	-0.960085	NA	0	0	-2.37425	NA	0	0	-2.2788	0.768927	0
F7	ENSG00000057593	protein_coding	0	0	1.92769	NA	0	0	0.632278	NA	0	0	0.423435	NA	0
GDI2	ENSG00000057608	protein_coding	0	0	-0.376425	0.000297334	0	1	0.375864	0.0303367	1	0	0.300091	0.173594	0
PRDM1	ENSG00000057657	protein_coding	0	0	-0.931008	NA	0	0	-0.99988	NA	0	0	-0.170379	NA	0
ATG5	ENSG00000057663	protein_coding	0	0	-0.0830532	0.877603	0	0	0.864229	0.123746	0	0	1.46317	0.0125049	1
TMCC3	ENSG00000057704	protein_coding	0	0	0.238557	0.667691	0	0	0.585778	0.411081	0	0	0.745985	0.253264	0
PITHD1	ENSG00000057757	protein_coding	0	0	0.115347	0.728778	0	0	0.11995	0.802142	0	0	0.417529	0.300667	0
MTA3	ENSG00000057935	protein_coding	0	0	0.0190717	0.965095	0	0	0.134214	0.793293	0	0	0.192269	0.685699	0
USP13	ENSG00000058056	protein_coding	0	0	0.37344	0.0723799	0	0	0.873466	0.000861227	1	0	0.998111	0.000385048	1
ATP11B	ENSG00000058063	protein_coding	0	0	-0.536423	0.00634009	0	1	0.40393	0.219973	0	0	0.727683	0.025412	1
LAMC2	ENSG00000058085	protein_coding	0	0	0.74838	0.528161	0	0	1.8014	NA	0	0	0.651639	0.682938	0
CDK14	ENSG00000058091	protein_coding	0	0	0.205161	0.622493	0	0	0.937666	0.0353752	1	0	1.06655	0.0243179	1
SEC61A1	ENSG00000058262	protein_coding	0	0	0.277348	0.0214824	0	0	0.273234	0.108714	0	0	-0.0785954	0.7412	0
PPP1R12A	ENSG00000058272	protein_coding	0	0	0.0787195	0.740326	0	0	0.987117	1.80646e-06	1	0	1.27328	3.27489e-08	1
RASGRF1	ENSG00000058335	protein_coding	0	0	0.152624	NA	0	0	-0.551473	NA	0	0	-0.757384	0.65378	0
CAMK2B	ENSG00000058404	protein_coding	0	0	0.188347	0.901929	0	0	0.143159	NA	0	0	-0.374075	0.819849	0
CROCC	ENSG00000058453	protein_coding	0	0	0.625996	0.14355	0	0	-0.452069	0.378038	0	0	-0.052537	0.94497	0
POLR3E	ENSG00000058600	protein_coding	0	0	0.528994	0.00136332	1	0	0.124552	0.677851	0	0	0.11287	0.718558	0
ATP2B4	ENSG00000058668	protein_coding	0	0	0.928855	9.72299e-09	1	0	0.377751	0.0718246	0	0	0.700488	0.00092903	1
ZC3H11A	ENSG00000058673	protein_coding	0	0	0.279644	0.0324237	0	0	0.532923	0.00115361	1	0	0.85493	1.19308e-06	1
RIOK2	ENSG00000058729	protein_coding	0	0	0.0692912	0.864104	0	0	0.847888	0.0181133	1	0	1.56906	4.94341e-05	1
YIPF1	ENSG00000058799	protein_coding	0	0	-0.346694	0.582472	0	0	-0.368184	0.670972	0	0	-0.430929	0.592788	0
NDC1	ENSG00000058804	protein_coding	0	0	-0.00200694	0.993011	0	0	0.929633	7.49984e-08	1	0	0.523787	0.0057885	1
DGKG	ENSG00000058866	protein_coding	0	0	1.50744	NA	0	0	3.1735	NA	0	0	-0.243646	NA	0
FLYWCH1	ENSG00000059122	protein_coding	0	0	0.357486	0.159824	0	0	-0.433468	0.122952	0	0	-0.461774	0.144352	0
UNKL	ENSG00000059145	protein_coding	0	0	0.350542	0.299537	0	0	0.58276	0.228517	0	0	0.197738	0.706834	0
TBXAS1	ENSG00000059377	protein_coding	0	0	-0.142734	0.90235	0	0	-0.875026	0.383949	0	0	-0.772711	0.464498	0
PARP12	ENSG00000059378	protein_coding	0	0	-1.82281	NA	0	0	-3.13765	NA	0	0	-3.68278	NA	0
ALDH18A1	ENSG00000059573	protein_coding	1	0	0.397525	0.00165704	1	0	0.519725	0.000729339	1	0	0.375101	0.0418068	1
TARBP1	ENSG00000059588	protein_coding	0	0	-0.0955446	0.657162	0	0	-0.138443	0.61321	0	0	-0.175488	0.499612	0
GATB	ENSG00000059691	protein_coding	0	0	0.67642	0.011242	1	0	0.366039	0.339254	0	0	0.93818	0.00913296	1
MXD1	ENSG00000059728	protein_coding	0	0	-0.515499	0.213498	0	0	-0.545018	0.334152	0	0	-0.983153	0.0289322	0
CDK17	ENSG00000059758	protein_coding	0	0	0.490745	0.0537122	0	0	0.828064	0.0183524	1	0	1.05504	0.00228579	1
DNAJC25	ENSG00000059769	protein_coding	0	0	-0.293022	0.708413	0	0	-0.532724	0.552894	0	0	0.503906	0.649665	0
SLC2A3	ENSG00000059804	protein_coding	0	0	1.17473	0.0224898	1	0	0.635906	0.389436	0	0	0.0428424	0.963524	0
PSD	ENSG00000059915	protein_coding	0	0	0.728661	0.490579	0	0	-0.531537	0.659805	0	0	-0.728534	0.496867	0
CTDP1	ENSG00000060069	protein_coding	0	0	1.03817	0.0396674	1	0	0.383716	0.617038	0	0	0.409159	0.588272	0
YBX3	ENSG00000060138	protein_coding	0	0	-0.0790026	0.592211	0	0	-0.239661	0.123925	0	0	-0.129306	0.538469	0
STYK1	ENSG00000060140	protein_coding	0	0	-0.460222	NA	0	0	1.06676	NA	0	0	-0.555014	NA	0
WNK1	ENSG00000060237	protein_coding	0	0	0.338278	0.0583626	0	0	0.0392491	0.880914	0	0	0.235399	0.266545	0
RPS17P5	ENSG00000060303	processed_pseudogene	0	0	NA	NA	0	0	NA	NA	0	0	NA	NA	0
CCAR1	ENSG00000060339	protein_coding	0	0	0.145456	0.528161	0	0	0.628844	0.00405037	1	0	0.828932	0.000192084	1
OGFR	ENSG00000060491	protein_coding	0	0	1.1329	1.91686e-06	1	0	-0.26733	0.42142	0	0	0.117564	0.777759	0
GNA15	ENSG00000060558	protein_coding	0	0	NA	NA	0	0	NA	NA	0	0	-2.39584	NA	0
CREB3L3	ENSG00000060566	protein_coding	0	0	0.618427	NA	0	0	-0.860017	NA	0	0	-1.0328	NA	0
PIGV	ENSG00000060642	protein_coding	0	0	0.00154237	0.999016	0	0	-0.218226	0.835556	0	0	-1.4387	0.0122333	0
PTPRU	ENSG00000060656	protein_coding	0	0	0.441857	0.0029687	1	0	-0.108888	0.670774	0	0	-0.0673074	0.805577	0
SNRNP40	ENSG00000060688	protein_coding	0	0	0.153094	0.498451	0	0	0.232116	0.375349	0	0	0.126891	0.670421	0
RIMBP2	ENSG00000060709	protein_coding	0	0	0.435843	NA	0	0	-1.20427	NA	0	0	0.623736	NA	0
COL11A1	ENSG00000060718	protein_coding	0	0	NA	NA	0	0	NA	NA	0	0	NA	NA	0
QSER1	ENSG00000060749	protein_coding	0	0	-0.394872	0.00664538	0	1	0.267414	0.245594	0	0	0.755955	0.000411324	1
MPC1	ENSG00000060762	protein_coding	0	0	-0.572771	0.0540798	0	0	-0.281057	0.609119	0	0	0.27247	0.65378	0
ACAA1	ENSG00000060971	protein_coding	0	0	0.0244232	0.970527	0	0	-0.277899	0.634126	0	0	-0.342384	0.543144	0
BCAT1	ENSG00000060982	protein_coding	0	0	-0.180535	0.428224	0	0	0.931569	1.76741e-05	1	0	1.42144	4.86201e-10	1
HDAC7	ENSG00000061273	protein_coding	0	0	0.485073	0.18442	0	0	-0.263567	0.608501	0	0	-0.608012	0.13832	0
LZTS1	ENSG00000061337	protein_coding	0	0	0.524008	0.675485	0	0	-0.081326	0.966886	0	0	0.249496	0.886416	0
PRDM6	ENSG00000061455	protein_coding	0	0	-0.3471	0.313112	0	0	-0.227849	0.674548	0	0	-0.027031	0.96806	0
WNT8A	ENSG00000061492	protein_coding	0	0	NA	NA	0	0	NA	NA	0	0	NA	NA	0
SPAG4	ENSG00000061656	protein_coding	0	0	-0.878884	0.425233	0	0	-0.718797	0.671907	0	0	-1.69441	0.107617	0
NCKAP1	ENSG00000061676	protein_coding	0	0	-0.0116251	0.960335	0	0	0.823803	2.63196e-07	1	0	1.17924	8.29254e-11	1
MRPS35	ENSG00000061794	protein_coding	0	0	-0.179936	0.512226	0	0	0.221506	0.558698	0	0	1.01705	0.00323322	1
GUCY1B3	ENSG00000061918	protein_coding	0	0	0.412289	0.221986	0	0	0.810161	0.0605656	0	0	1.4274	0.00139217	1
SFSWAP	ENSG00000061936	protein_coding	0	0	0.579413	0.0022511	1	0	0.23406	0.424152	0	0	0.404974	0.1355	0
TNK2	ENSG00000061938	protein_coding	0	0	0.421081	0.283417	0	0	-0.633485	0.111572	0	0	-0.959324	0.00901739	0
MON2	ENSG00000061987	protein_coding	0	0	-0.489528	0.00934396	0	1	0.10935	0.761647	0	0	0.128248	0.713303	0
CDH3	ENSG00000062038	protein_coding	0	0	1.11965	NA	0	0	1.42788	NA	0	0	1.06716	NA	0
ARSF	ENSG00000062096	protein_coding	0	0	NA	NA	0	0	NA	NA	0	0	NA	NA	0
GPBP1	ENSG00000062194	protein_coding	0	0	-0.0825813	0.764232	0	0	0.922568	3.01137e-06	1	0	1.16592	3.09917e-08	1
DGAT2	ENSG00000062282	protein_coding	0	0	0.616622	0.468657	0	0	0.475432	0.690988	0	0	0.161574	0.898359	0
ZNF112	ENSG00000062370	protein_coding	0	0	0.514211	0.560862	0	0	0.50794	0.688317	0	0	1.72812	0.154141	0
CS	ENSG00000062485	protein_coding	0	0	-0.0659043	0.687056	0	0	0.185132	0.342876	0	0	-0.0147413	0.956786	0
LTK	ENSG00000062524	protein_coding	0	0	0.218765	0.885765	0	0	-1.12482	0.348561	0	0	-0.914965	0.46749	0
MRPS24	ENSG00000062582	protein_coding	0	0	-3.62897	NA	0	0	-3.13765	NA	0	0	-4.26872	NA	0
ELMO2	ENSG00000062598	protein_coding	0	0	0.797122	0.000806841	1	0	0.625946	0.0616387	0	0	0.919146	0.00790083	1
WAPL	ENSG00000062650	protein_coding	1	0	0.366414	0.00264155	1	0	1.21228	6.3987e-15	1	0	1.71645	7.10387e-23	1
VMP1	ENSG00000062716	protein_coding	0	0	-0.366237	0.097782	0	0	0.301386	0.362012	0	0	0.639847	0.0390133	1
APPBP2	ENSG00000062725	protein_coding	0	0	-0.0666785	0.824891	0	0	0.72052	0.00315902	1	0	1.01665	4.15331e-05	1
POLD1	ENSG00000062822	protein_coding	0	0	0.243459	0.257023	0	0	-0.325165	0.152721	0	0	-0.420875	0.0758782	0
SEZ6	ENSG00000063015	protein_coding	0	0	0.572822	NA	0	0	-0.155678	NA	0	0	-0.933904	0.593975	0
EIF4B	ENSG00000063046	protein_coding	0	0	-0.0528074	0.729879	0	0	1.16465	3.75263e-25	1	0	1.25237	9.05194e-16	1
SLC6A16	ENSG00000063127	protein_coding	0	0	-0.211893	0.88129	0	0	-0.457474	0.789716	0	0	-1.20069	0.3014	0
GLTSCR1	ENSG00000063169	protein_coding	0	0	0.506298	0.288863	0	0	-0.171683	0.795429	0	0	-0.426577	0.409809	0
SPHK2	ENSG00000063176	protein_coding	0	0	0.264481	0.646628	0	0	-0.377856	0.562953	0	0	-1.19605	0.00483114	0
RPL18	ENSG00000063177	protein_coding	0	0	-0.199751	0.0812354	0	0	-0.648911	2.97131e-08	0	1	-0.478025	0.00165241	0
CA11	ENSG00000063180	protein_coding	0	0	-0.180112	0.833727	0	0	-0.421534	0.625862	0	0	-0.567407	0.483597	0
ISOC2	ENSG00000063241	protein_coding	0	0	0.189335	0.66968	0	0	-0.200738	0.699081	0	0	-0.278686	0.563083	0
U2AF2	ENSG00000063244	protein_coding	0	0	0.330152	0.0145807	1	0	0.238278	0.158472	0	0	0.2147	0.275981	0
EPN1	ENSG00000063245	protein_coding	0	0	0.460319	0.0219512	1	0	-0.424634	0.0442692	0	1	-0.398123	0.0903853	0
MED29	ENSG00000063322	protein_coding	0	0	-0.031786	0.923482	0	0	0.349771	0.276463	0	0	-0.473028	0.0783744	0
AHRR	ENSG00000063438	protein_coding	0	0	0.570144	0.18249	0	0	-0.578066	0.209682	0	0	-0.258895	0.661217	0
GSC2	ENSG00000063515	protein_coding	0	0	NA	NA	0	0	NA	NA	0	0	NA	NA	0
ZNF275	ENSG00000063587	protein_coding	0	0	0.16296	0.622471	0	0	-0.105246	0.818922	0	0	-0.548422	0.0589066	0
MTMR1	ENSG00000063601	protein_coding	1	0	0.390389	0.0278073	1	0	0.944927	1.15092e-05	1	0	0.655136	0.00593319	1
GPC1	ENSG00000063660	protein_coding	0	0	0.343362	0.338006	0	0	-0.0379789	0.957304	0	0	-0.0937419	0.861528	0
ADCK1	ENSG00000063761	protein_coding	0	0	0.383953	0.544728	0	0	-0.143248	0.884555	0	0	-0.644526	0.335441	0
HAGH	ENSG00000063854	protein_coding	0	0	0.549926	0.150669	0	0	-0.0173333	0.981309	0	0	0.0150626	0.982513	0
RNF4	ENSG00000063978	protein_coding	0	0	0.460922	0.0778514	0	0	0.0427326	0.932191	0	0	0.00162945	0.997809	0
CASP8	ENSG00000064012	protein_coding	0	0	0.162317	0.7764	0	0	0.843603	0.215871	0	0	1.10842	0.105052	0
LIMCH1	ENSG00000064042	protein_coding	0	0	-0.00667606	0.991675	0	0	0.606062	0.346503	0	0	0.624635	0.314715	0
ASUN	ENSG00000064102	protein_coding	0	0	-0.592732	0.00267144	0	1	0.110792	0.803965	0	0	0.875369	0.00814371	1
TM7SF3	ENSG00000064115	protein_coding	0	0	0.0950679	0.754392	0	0	0.639148	0.046847	1	0	0.347696	0.328391	0
DLX3	ENSG00000064195	protein_coding	0	0	-0.576795	NA	0	0	0.852929	NA	0	0	-0.803649	NA	0
SPA17	ENSG00000064199	protein_coding	0	0	-0.312933	0.765685	0	0	-0.601301	0.627933	0	0	-0.616435	0.597439	0
TSPAN32	ENSG00000064201	protein_coding	0	0	0.277404	NA	0	0	-0.592563	NA	0	0	0.779223	NA	0
WISP2	ENSG00000064205	protein_coding	0	0	-1.08031	NA	0	0	-3.71827	NA	0	0	-3.75354	NA	0
DMRT3	ENSG00000064218	protein_coding	0	0	0.378999	NA	0	0	-0.0522628	NA	0	0	0.250071	NA	0
ST3GAL6	ENSG00000064225	protein_coding	0	0	-0.401641	0.430837	0	0	-0.04792	0.965553	0	0	0.272301	0.765985	0
ATP2C2	ENSG00000064270	protein_coding	0	0	-0.978206	NA	0	0	-1.86103	NA	0	0	-2.62007	NA	0
NGFR	ENSG00000064300	protein_coding	0	0	-1.87211	0.088345	0	0	2.26224	NA	0	0	0.139868	NA	0
CDON	ENSG00000064309	protein_coding	0	0	0.192247	0.553292	0	0	0.359913	0.373703	0	0	0.406754	0.359532	0
TAF2	ENSG00000064313	protein_coding	0	0	-0.185099	0.415309	0	0	0.228438	0.446041	0	0	0.723552	0.00637977	1
HIPK2	ENSG00000064393	protein_coding	0	0	0.0428555	0.886512	0	0	0.00333327	0.993487	0	0	0.00152538	0.997139	0
TNPO3	ENSG00000064419	protein_coding	0	0	0.288978	0.061633	0	0	0.476054	0.0175614	1	0	0.492628	0.0214569	1
BORCS8-MEF2B	ENSG00000064489	protein_coding	0	0	NA	NA	0	0	NA	NA	0	0	NA	NA	0
RFXANK	ENSG00000064490	protein_coding	0	0	-0.0790017	0.886521	0	0	-0.660056	0.144276	0	0	-0.954296	0.0197666	0
TMEM161A	ENSG00000064545	protein_coding	0	0	0.317594	0.203225	0	0	-0.428598	0.137855	0	0	-1.1805	7.30521e-08	0
LPAR2	ENSG00000064547	protein_coding	0	0	0.908928	0.462342	0	0	-0.409043	0.778698	0	0	-0.126246	0.938553	0
CTSA	ENSG00000064601	protein_coding	0	0	-0.227078	0.575482	0	0	-0.659956	0.0965394	0	0	-1.19145	0.00034593	0
SUGP2	ENSG00000064607	protein_coding	0	0	-0.129524	0.504115	0	0	-0.0343755	0.920879	0	0	-0.106521	0.72716	0
SLC12A2	ENSG00000064651	protein_coding	0	0	-0.0261226	0.938634	0	0	0.870251	0.000210934	1	0	0.998286	0.000134453	1
SNX24	ENSG00000064652	protein_coding	0	0	-0.844916	0.0347913	0	1	-0.182194	0.852222	0	0	0.267281	0.776675	0
EYA2	ENSG00000064655	protein_coding	0	0	0.180797	0.813749	0	0	-0.000739193	0.999623	0	0	-0.499942	0.512279	0
CNN2	ENSG00000064666	protein_coding	0	0	-0.226479	0.468394	0	0	-0.00966454	0.988038	0	0	-0.126531	0.804221	0
ABCA7	ENSG00000064687	protein_coding	0	0	-0.0680609	0.920808	0	0	-0.745732	0.178043	0	0	-1.37288	0.000766547	0
SNCAIP	ENSG00000064692	protein_coding	0	0	-0.0216856	NA	0	0	0.0920169	NA	0	0	0.539424	NA	0
DDX20	ENSG00000064703	protein_coding	0	0	0.147603	0.584177	0	0	0.875001	0.000111311	1	0	1.27865	3.82467e-07	1
BTBD1	ENSG00000064726	protein_coding	0	0	0.241605	0.112595	0	0	1.11607	7.87525e-11	1	0	1.44054	1.68651e-13	1
FAR2	ENSG00000064763	protein_coding	0	0	-0.433988	0.133886	0	0	0.24509	0.63587	0	0	0.57614	0.213844	0
BCAS1	ENSG00000064787	protein_coding	0	0	0.619848	NA	0	0	-0.86025	NA	0	0	1.42068	NA	0
POU1F1	ENSG00000064835	protein_coding	0	0	-2.5826	NA	0	0	NA	NA	0	0	NA	NA	0
CHI3L2	ENSG00000064886	protein_coding	0	0	0.340692	NA	0	0	-0.970611	NA	0	0	-0.953744	NA	0
SBNO2	ENSG00000064932	protein_coding	0	0	0.476588	0.525696	0	0	-0.913671	0.161349	0	0	-0.557288	0.494538	0
PMS1	ENSG00000064933	protein_coding	0	0	-0.480689	0.202297	0	0	-0.115884	0.848977	0	0	0.217307	0.701883	0
HMG20B	ENSG00000064961	protein_coding	0	0	0.00908084	0.980086	0	0	-0.200794	0.522932	0	0	-0.0582303	0.902394	0
CALCRL	ENSG00000064989	protein_coding	0	0	-0.105309	0.945515	0	0	-0.0744685	0.973804	0	0	-0.00504817	0.998389	0
TAF11	ENSG00000064995	protein_coding	0	0	-0.06417	0.888229	0	0	0.355571	0.474967	0	0	0.916481	0.0422908	1
ANKS1A	ENSG00000064999	protein_coding	0	0	0.452473	0.0329577	1	0	0.461815	0.105415	0	0	0.272563	0.405613	0
AP3D1	ENSG00000065000	protein_coding	0	0	0.709531	2.98276e-09	1	0	0.191666	0.282205	0	0	0.296561	0.111382	0
ZNF76	ENSG00000065029	protein_coding	0	0	0.212372	0.570604	0	0	-0.212641	0.652082	0	0	-0.301456	0.497758	0
SLC9A3R2	ENSG00000065054	protein_coding	0	0	0.460791	0.161641	0	0	-0.128707	0.805933	0	0	-0.05255	0.924454	0
NTHL1	ENSG00000065057	protein_coding	0	0	0.0731749	0.894654	0	0	-0.349595	0.516607	0	0	0.0655266	0.928869	0
UHRF1BP1	ENSG00000065060	protein_coding	0	0	0.544812	0.0144301	1	0	0.398272	0.236441	0	0	0.501542	0.170901	0
GNAI3	ENSG00000065135	protein_coding	0	0	-0.415699	0.0118314	0	1	0.277478	0.234076	0	0	0.626143	0.00377984	1
IPO5	ENSG00000065150	protein_coding	0	0	0.240218	0.0515713	0	0	0.999953	2.05641e-19	1	0	1.47223	2.36712e-30	1
OAT	ENSG00000065154	protein_coding	0	0	-0.0909971	0.665969	0	0	0.568922	0.0050125	1	0	1.06488	9.86057e-07	1
WDR3	ENSG00000065183	protein_coding	1	0	0.675603	1.10671e-06	1	0	1.13224	3.04431e-11	1	0	1.57112	5.23195e-16	1
PKN2	ENSG00000065243	protein_coding	0	0	-0.217505	0.233507	0	0	0.829187	1.50994e-06	1	0	1.3002	2.17587e-11	1
WDR18	ENSG00000065268	protein_coding	0	0	0.377754	0.155498	0	0	-0.841559	0.000292236	0	1	-1.07274	8.2175e-06	0
TRAM2	ENSG00000065308	protein_coding	0	0	0.403173	0.239257	0	0	0.137455	0.813471	0	0	-0.594751	0.105926	0
NTN1	ENSG00000065320	protein_coding	0	0	0.582211	0.0164015	1	0	0.0397301	0.940322	0	0	0.0587811	0.902255	0
GLP2R	ENSG00000065325	protein_coding	0	0	0.340692	NA	0	0	0.588662	NA	0	0	-0.953744	NA	0
MCM10	ENSG00000065328	protein_coding	1	0	0.77134	3.6331e-11	1	0	0.997173	4.587e-10	1	0	1.41655	1.66211e-15	1
DGKA	ENSG00000065357	protein_coding	0	0	0.309472	0.549428	0	0	0.180112	0.826023	0	0	0.430824	0.53717	0
ERBB3	ENSG00000065361	protein_coding	0	0	-0.535319	0.557226	0	0	0.457203	0.78616	0	0	1.25981	0.418874	0
ROPN1	ENSG00000065371	protein_coding	0	0	NA	NA	0	0	NA	NA	0	0	NA	NA	0
ANKRD44	ENSG00000065413	protein_coding	0	0	0.0597991	NA	0	0	-0.429557	NA	0	0	-0.294701	NA	0
KARS	ENSG00000065427	protein_coding	0	0	-0.0815545	0.690059	0	0	0.199027	0.41274	0	0	0.521924	0.0168871	1
ADAT1	ENSG00000065457	protein_coding	0	0	0.118483	0.801949	0	0	0.278622	0.604606	0	0	0.219605	0.678596	0
PDIA5	ENSG00000065485	protein_coding	0	0	0.230888	0.633566	0	0	-0.0522562	0.950015	0	0	0.224293	0.769015	0
TBC1D22B	ENSG00000065491	protein_coding	0	0	0.690379	0.0690796	0	0	0.609306	0.214201	0	0	0.335694	0.53104	0
NDUFB4	ENSG00000065518	protein_coding	0	1	-0.935065	0.00018486	0	1	-1.40825	1.79178e-06	0	1	-0.615757	0.164075	0
SPEN	ENSG00000065526	protein_coding	0	0	0.0851892	0.682058	0	0	-0.132553	0.518209	0	0	0.0612082	0.804878	0
MYLK	ENSG00000065534	protein_coding	0	0	1.08036	0.000810251	1	0	0.588769	0.19086	0	0	0.342616	0.487621	0
ZC3H15	ENSG00000065548	protein_coding	0	0	0.158194	0.489872	0	0	0.942622	1.64526e-06	1	0	1.17838	7.71864e-08	1
MAP2K4	ENSG00000065559	protein_coding	0	0	0.284143	0.26051	0	0	1.0716	3.82918e-05	1	0	1.30948	4.66887e-06	1
TMEM206	ENSG00000065600	protein_coding	0	0	0.184338	0.563902	0	0	0.559812	0.110755	0	0	0.733468	0.0398991	1
SNAP91	ENSG00000065609	protein_coding	0	0	-0.262209	0.747516	0	0	0.104932	0.942805	0	0	0.295242	0.809467	0
SLK	ENSG00000065613	protein_coding	0	0	0.134127	0.568883	0	0	0.71553	6.76628e-05	1	0	1.22519	3.44078e-11	1
CYB5R4	ENSG00000065615	protein_coding	0	0	-0.657276	0.0124276	0	1	0.388581	0.463852	0	0	0.630757	0.216111	0
COL17A1	ENSG00000065618	protein_coding	0	0	-0.105078	0.947209	0	0	-0.950137	0.482058	0	0	-1.61941	0.0983705	0
GSTO2	ENSG00000065621	protein_coding	0	0	0.209079	0.79114	0	0	-0.944458	0.122675	0	0	-1.02724	0.091786	0
SEC61A2	ENSG00000065665	protein_coding	0	0	-0.224515	0.540809	0	0	-0.166278	0.766159	0	0	-0.701891	0.0619761	0
PRKCQ	ENSG00000065675	protein_coding	0	0	0.385594	0.458678	0	0	0.264924	0.741516	0	0	0.592141	0.377389	0
TLE2	ENSG00000065717	protein_coding	0	0	0.564311	0.356469	0	0	-0.203752	0.808979	0	0	-0.504905	0.443195	0
ASB1	ENSG00000065802	protein_coding	0	0	0.09823	0.849886	0	0	-0.1631	0.79768	0	0	-0.412496	0.402673	0
FAM107B	ENSG00000065809	protein_coding	1	0	0.408023	0.0485637	1	0	1.24902	1.08982e-06	1	0	1.75361	1.70155e-09	1
ME1	ENSG00000065833	protein_coding	0	0	-0.514925	0.0833557	0	0	0.0413276	0.958924	0	0	0.637128	0.251219	0
TBC1D1	ENSG00000065882	protein_coding	0	0	0.491991	0.0439531	1	0	0.510106	0.132461	0	0	0.809273	0.0265664	1
CDK13	ENSG00000065883	protein_coding	0	0	0.0466569	0.88474	0	0	0.0417207	0.920879	0	0	0.376097	0.194473	0
MTHFD2	ENSG00000065911	protein_coding	1	0	0.529962	0.000145165	1	0	0.627596	3.37239e-05	1	0	1.24046	5.29575e-14	1
SLC9A7	ENSG00000065923	protein_coding	0	0	-0.412908	0.182483	0	0	0.384456	0.474136	0	0	0.241457	0.666585	0
FOXJ2	ENSG00000065970	protein_coding	0	0	0.149969	0.754392	0	0	-0.088065	0.890916	0	0	-0.0774221	0.899441	0
YBX1	ENSG00000065978	protein_coding	0	0	-0.192835	0.0989117	0	0	-0.757823	6.37079e-14	0	1	-0.49242	0.000312401	0
PDE4A	ENSG00000065989	protein_coding	0	0	-0.0924284	0.897954	0	0	0.247579	0.795301	0	0	-0.213777	0.806539	0
PPP2R5A	ENSG00000066027	protein_coding	0	0	0.346103	0.180805	0	0	0.705094	0.0216709	1	0	0.780554	0.0215025	1
CTNNA2	ENSG00000066032	protein_coding	0	0	NA	NA	0	0	NA	NA	0	0	NA	NA	0
ELAVL1	ENSG00000066044	protein_coding	0	0	0.0904668	0.633757	0	0	0.301439	0.161379	0	0	0.37024	0.0899895	0
TIE1	ENSG00000066056	protein_coding	0	0	0.340692	NA	0	0	-2.00423	NA	0	0	0.421613	NA	0
DIP2B	ENSG00000066084	protein_coding	1	0	0.752832	1.33206e-05	1	0	0.953013	4.16707e-06	1	0	0.930473	7.34352e-05	1
SMARCD1	ENSG00000066117	protein_coding	0	0	0.162936	0.468657	0	0	0.109495	0.711821	0	0	0.0414427	0.902084	0
KDM4A	ENSG00000066135	protein_coding	1	0	0.911502	1.32284e-08	1	0	0.765292	0.000871347	1	0	1.01309	1.50175e-05	1
NFYC	ENSG00000066136	protein_coding	0	0	0.114736	0.774616	0	0	-0.42704	0.26574	0	0	-0.471261	0.220869	0
ZMYND12	ENSG00000066185	protein_coding	0	0	-0.380621	NA	0	0	0.588662	NA	0	0	-0.953744	NA	0
SLC9A3	ENSG00000066230	protein_coding	0	0	-0.0475999	NA	0	0	-1.6627	0.149607	0	0	-1.52242	0.189	0
NGEF	ENSG00000066248	protein_coding	0	0	0.736065	0.0647813	0	0	0.114064	0.872034	0	0	0.268917	0.651386	0
ASPM	ENSG00000066279	protein_coding	0	0	-0.558833	0.000251702	0	1	-0.125021	0.572909	0	0	0.563858	0.00293342	1
CD84	ENSG00000066294	protein_coding	0	0	NA	NA	0	0	NA	NA	0	0	NA	NA	0
ELOVL1	ENSG00000066322	protein_coding	0	0	0.114364	0.811165	0	0	-0.436938	0.352893	0	0	-1.46312	2.46481e-06	0
SPI1	ENSG00000066336	protein_coding	0	0	-0.756	NA	0	0	0.632278	NA	0	0	-1.73239	NA	0
ZNRD1	ENSG00000066379	protein_coding	0	0	1.33964	NA	0	0	0.193666	NA	0	0	-2.13073	NA	0
MPPED2	ENSG00000066382	protein_coding	0	0	-0.0683907	0.943691	0	0	-0.0846854	0.948755	0	0	0.314722	0.775863	0
CLDN18	ENSG00000066405	protein_coding	0	0	-1.82775	NA	0	0	-2.18281	NA	0	0	-2.92909	0.0623121	0
ZBTB11	ENSG00000066422	protein_coding	0	0	-0.0261325	0.937561	0	0	0.609461	0.0181133	1	0	1.12889	3.00812e-05	1
ATXN3	ENSG00000066427	protein_coding	0	0	-0.420343	0.132906	0	0	0.329296	0.503018	0	0	0.236485	0.649148	0
GOLGA5	ENSG00000066455	protein_coding	0	0	0.0322613	0.929145	0	0	0.720333	0.0287201	1	0	1.55797	6.72737e-06	1
FGFR2	ENSG00000066468	protein_coding	0	0	0.0979811	0.722307	0	0	0.799836	0.00289957	1	0	1.03477	0.000404229	1
LRRC40	ENSG00000066557	protein_coding	0	0	-0.581046	0.000509396	0	1	0.210662	0.539094	0	0	0.986476	0.000452275	1
ISOC1	ENSG00000066583	protein_coding	0	0	-0.35281	0.143339	0	0	0.408773	0.320368	0	0	-0.250305	0.51568	0
EML1	ENSG00000066629	protein_coding	0	0	0.264353	0.364818	0	0	0.911856	0.00775926	1	0	1.03409	0.00433478	1
TRMT11	ENSG00000066651	protein_coding	0	0	-0.428798	0.162556	0	0	0.159513	0.791255	0	0	0.556276	0.263418	0
THUMPD1	ENSG00000066654	protein_coding	0	0	-0.0357752	0.903184	0	0	0.977615	3.19311e-05	1	0	1.4824	5.15518e-08	1
MSANTD3	ENSG00000066697	protein_coding	0	0	-0.344245	0.443605	0	0	0.150812	0.866353	0	0	0.374935	0.608341	0
KIF26A	ENSG00000066735	protein_coding	0	0	0.531513	0.030671	1	0	-0.10844	0.791825	0	0	0.0421336	0.930184	0
ATG2B	ENSG00000066739	protein_coding	0	0	0.172016	0.491051	0	0	0.397134	0.116129	0	0	0.669769	0.0145613	1
ARFGEF1	ENSG00000066777	protein_coding	0	0	0.0732401	0.764232	0	0	0.946757	8.85667e-05	1	0	1.26076	6.96218e-07	1
ACSM2B	ENSG00000066813	protein_coding	0	0	NA	NA	0	0	NA	NA	0	0	NA	NA	0
ZFAT	ENSG00000066827	protein_coding	0	0	0.00190705	0.998004	0	0	-0.222223	0.760277	0	0	-0.147163	0.843239	0
MTFR1	ENSG00000066855	protein_coding	0	0	-0.266222	0.324466	0	0	0.877607	0.00232682	1	0	1.10558	0.000343101	1
STAG3	ENSG00000066923	protein_coding	0	0	-0.7019	NA	0	0	-1.1369	NA	0	0	-2.01705	0.165923	0
FECH	ENSG00000066926	protein_coding	0	0	0.285755	0.225668	0	0	0.789413	0.00154752	1	0	0.664435	0.0158447	1
MYO9A	ENSG00000066933	protein_coding	0	0	-0.261777	0.231531	0	0	0.546183	0.0201154	1	0	0.754002	0.00279729	1
DDX3Y	ENSG00000067048	protein_coding	0	0	NA	NA	0	0	NA	NA	0	0	NA	NA	0
PFKP	ENSG00000067057	protein_coding	0	0	0.37488	0.059237	0	0	0.0337553	0.936388	0	0	0.147455	0.649148	0
IDI1	ENSG00000067064	protein_coding	0	0	-0.0506258	0.867101	0	0	0.835989	0.00103397	1	0	1.79028	3.20767e-09	1
SP100	ENSG00000067066	protein_coding	0	0	-2.56672	NA	0	0	NA	NA	0	0	-2.39584	NA	0
KLF6	ENSG00000067082	protein_coding	0	0	0.227737	0.34542	0	0	0.416846	0.159304	0	0	0.522808	0.0803523	0
PLPP1	ENSG00000067113	protein_coding	0	0	0.506012	0.478483	0	0	0.354987	0.723967	0	0	-0.318956	0.711474	0
NEO1	ENSG00000067141	protein_coding	0	0	0.241854	0.245977	0	0	0.294157	0.286421	0	0	0.307246	0.289281	0
TRAM1	ENSG00000067167	protein_coding	0	0	-0.679534	2.55309e-05	0	1	0.172967	0.556763	0	0	0.18491	0.52784	0
PHKA1	ENSG00000067177	protein_coding	0	0	0.150643	0.549979	0	0	0.525332	0.0634496	0	0	0.407459	0.22532	0
TNFRSF1A	ENSG00000067182	protein_coding	0	0	0.375746	0.29355	0	0	0.150374	0.800562	0	0	0.0376327	0.956827	0
CACNB1	ENSG00000067191	protein_coding	0	0	0.0702165	0.948508	0	0	-0.611382	0.523462	0	0	-1.27266	0.0661497	0
EVI5	ENSG00000067208	protein_coding	0	0	0.00153779	0.997353	0	0	0.862135	0.00466939	1	0	1.31479	8.61389e-05	1
STOML1	ENSG00000067221	protein_coding	0	0	0.813787	0.258098	0	0	0.149435	0.890812	0	0	0.138081	0.895439	0
PKM	ENSG00000067225	protein_coding	0	0	0.194854	0.0750846	0	0	0.263839	0.0429651	0	0	0.298326	0.0444125	0
DHX29	ENSG00000067248	protein_coding	0	0	-0.0189967	0.953028	0	0	0.692952	0.00893046	1	0	1.19853	1.81869e-05	1
DNTTIP2	ENSG00000067334	protein_coding	0	0	0.0363332	0.890694	0	0	0.720931	0.00149988	1	0	1.42884	3.57579e-08	1
METTL22	ENSG00000067365	protein_coding	0	0	-0.391288	0.450361	0	0	-0.849008	0.0992624	0	0	-1.58664	6.93148e-05	0
TP53BP1	ENSG00000067369	protein_coding	0	0	0.380625	0.0543113	0	0	0.920596	4.04451e-05	1	0	1.28975	1.25279e-07	1
TRO	ENSG00000067445	protein_coding	0	0	0.0530439	0.882958	0	0	0.164249	0.688955	0	0	0.336346	0.361638	0
RRP15	ENSG00000067533	protein_coding	0	0	-0.153021	0.514002	0	0	0.714583	0.0108617	1	0	1.08099	0.000366491	1
RHOA	ENSG00000067560	protein_coding	0	0	-0.697244	2.41905e-16	0	1	0.139462	0.458778	0	0	0.0297735	0.903331	0
DHX8	ENSG00000067596	protein_coding	1	0	0.947595	9.16077e-15	1	0	1.00492	5.31396e-10	1	0	1.1905	8.64826e-11	1
PMS2P4	ENSG00000067601	transcribed_unprocessed_pseudogene	0	0	-0.420884	0.740753	0	0	0.510003	NA	0	0	0.303409	0.884873	0
PRKCZ	ENSG00000067606	protein_coding	0	0	0.406059	0.478312	0	0	-0.235818	0.748201	0	0	-0.0158172	0.986541	0
ZFY	ENSG00000067646	protein_coding	0	0	NA	NA	0	0	NA	NA	0	0	NA	NA	0
IARS2	ENSG00000067704	protein_coding	1	0	0.540089	1.04112e-07	1	0	1.40944	3.81775e-28	1	0	1.69178	5.9668e-28	1
SYT1	ENSG00000067715	protein_coding	0	0	0.455108	0.3658	0	0	0.713264	0.278439	0	0	1.06463	0.112025	0
NAV3	ENSG00000067798	protein_coding	0	0	0.483353	NA	0	0	-0.570229	NA	0	0	1.61696	NA	0
IDH3G	ENSG00000067829	protein_coding	0	0	-0.33925	0.145499	0	0	-0.668536	0.0183694	0	1	-0.560494	0.12686	0
ROGDI	ENSG00000067836	protein_coding	0	0	0.317334	0.616022	0	0	-0.397568	0.518942	0	0	-0.446776	0.450174	0
PDZD4	ENSG00000067840	protein_coding	0	0	0.367002	0.419745	0	0	-0.162615	0.806613	0	0	-0.237338	0.686698	0
ATP2B3	ENSG00000067842	protein_coding	0	0	-0.0840114	NA	0	0	-0.54758	NA	0	0	-1.29664	0.292005	0
ROCK1	ENSG00000067900	protein_coding	0	0	0.0998295	0.637566	0	0	0.75563	1.62271e-05	1	0	1.19252	2.31801e-09	1
CBFB	ENSG00000067955	protein_coding	0	0	-0.411375	0.0615287	0	0	0.641014	0.0175419	1	0	0.519805	0.0782227	0
PDK3	ENSG00000067992	protein_coding	0	0	0.249635	0.603783	0	0	0.306932	0.591005	0	0	0.603907	0.25649	0
HYAL2	ENSG00000068001	protein_coding	0	0	-0.163803	0.777889	0	0	-0.115404	0.902165	0	0	-0.376133	0.579102	0
HDAC4	ENSG00000068024	protein_coding	0	0	0.434946	0.384545	0	0	-0.0799149	0.924685	0	0	0.202002	0.773816	0
RASSF1	ENSG00000068028	protein_coding	0	0	-0.211151	0.627897	0	0	-0.0487245	0.952607	0	0	0.0213081	0.977844	0
FGFR3	ENSG00000068078	protein_coding	0	0	0.437077	0.0272343	1	0	0.405482	0.192371	0	0	0.360716	0.277079	0
IFI35	ENSG00000068079	protein_coding	0	0	0.218585	0.889201	0	0	-0.714277	0.588622	0	0	-0.296919	0.852215	0
HEATR6	ENSG00000068097	protein_coding	0	0	0.306465	0.229348	0	0	0.0852854	0.848162	0	0	0.59024	0.0728865	0
COASY	ENSG00000068120	protein_coding	0	0	0.375906	0.0274566	1	0	0.0849145	0.798751	0	0	-0.0183349	0.960831	0
PLEKHH3	ENSG00000068137	protein_coding	0	0	0.413218	0.234725	0	0	-0.301459	0.508433	0	0	-0.590182	0.123487	0
MEF2A	ENSG00000068305	protein_coding	0	0	0.00911417	0.979948	0	0	0.46931	0.128389	0	0	0.731461	0.0314883	1
OTUD5	ENSG00000068308	protein_coding	0	0	0.174705	0.52037	0	0	-0.0592593	0.875398	0	0	-0.200342	0.4855	0
TFE3	ENSG00000068323	protein_coding	0	0	0.56512	0.0788697	0	0	-0.298131	0.506411	0	0	-0.077587	0.894346	0
TBC1D25	ENSG00000068354	protein_coding	0	0	0.314708	0.463486	0	0	-0.0373705	0.964452	0	0	-0.0191039	0.979249	0
ACSL4	ENSG00000068366	protein_coding	1	0	0.389478	0.0124999	1	0	1.51674	7.13909e-14	1	0	1.97373	1.18508e-17	1
INPP5A	ENSG00000068383	protein_coding	0	0	0.274455	0.399911	0	0	0.183608	0.69428	0	0	0.411152	0.337276	0
GPKOW	ENSG00000068394	protein_coding	0	0	0.338308	0.325653	0	0	-0.0507455	0.93471	0	0	0.206239	0.685699	0
GRIPAP1	ENSG00000068400	protein_coding	0	0	0.337067	0.279175	0	0	-0.155074	0.733786	0	0	-0.541386	0.09924	0
FTSJ1	ENSG00000068438	protein_coding	0	0	0.0234603	0.961761	0	0	-0.46389	0.209101	0	0	0.0859554	0.871743	0
PRR11	ENSG00000068489	protein_coding	0	0	-0.136476	0.683129	0	0	0.471531	0.258648	0	0	0.756572	0.0608193	0
REEP1	ENSG00000068615	protein_coding	0	0	0.247368	0.607721	0	0	0.751516	0.185191	0	0	0.987123	0.0866466	0
ATP11A	ENSG00000068650	protein_coding	0	0	0.300543	0.280238	0	0	-0.260367	0.515869	0	0	-0.234082	0.535506	0
POLR1A	ENSG00000068654	protein_coding	1	0	0.52476	1.63024e-05	1	0	0.577519	0.000438641	1	0	0.607178	0.000841769	1
LAPTM4A	ENSG00000068697	protein_coding	0	0	-0.117277	0.689491	0	0	0.404055	0.200203	0	0	-0.270667	0.396948	0
TTC7A	ENSG00000068724	protein_coding	0	0	0.415109	0.359865	0	0	0.181826	0.79839	0	0	-0.00124271	0.998941	0
IP6K2	ENSG00000068745	protein_coding	0	0	-0.115897	0.722206	0	0	-0.380524	0.199381	0	0	-0.338442	0.291237	0
STON1-GTF2A1L	ENSG00000068781	protein_coding	0	0	0.342383	NA	0	0	0.587413	NA	0	0	0.420332	NA	0
SRBD1	ENSG00000068784	protein_coding	0	0	0.175283	0.52037	0	0	0.79677	0.0103212	1	0	1.29687	4.10434e-05	1
KIF2A	ENSG00000068796	protein_coding	0	0	-0.142638	0.497255	0	0	0.940172	1.2311e-06	1	0	1.54868	2.43925e-12	1
RASGRP2	ENSG00000068831	protein_coding	0	0	-0.179243	0.914949	0	0	-1.10971	0.370237	0	0	-1.39587	0.217625	0
PSME4	ENSG00000068878	protein_coding	0	0	-0.139798	0.477031	0	0	0.585077	0.000846919	1	0	0.883668	8.84794e-06	1
IFT80	ENSG00000068885	protein_coding	0	0	-0.341692	0.43871	0	0	0.15574	0.860491	0	0	0.848598	0.190203	0
SIRT2	ENSG00000068903	protein_coding	0	0	NA	NA	0	0	NA	NA	0	0	NA	NA	0
ERLEC1	ENSG00000068912	protein_coding	0	0	0.345171	0.1339	0	0	1.57475	3.93857e-08	1	0	1.64865	1.10928e-07	1
PPP2R5B	ENSG00000068971	protein_coding	0	0	0.264404	0.648131	0	0	-0.235547	0.756819	0	0	-0.483258	0.418874	0
PYGM	ENSG00000068976	protein_coding	0	0	-2.3683	NA	0	0	-3.64581	0.00559561	0	1	-3.19187	0.0352628	0
PAGE1	ENSG00000068985	protein_coding	0	0	NA	NA	0	0	NA	NA	0	0	NA	NA	0
PITX1	ENSG00000069011	protein_coding	0	0	0.407658	0.0487788	1	0	0.131216	0.761714	0	0	-0.298217	0.306901	0
TRPC7	ENSG00000069018	protein_coding	0	0	0.33027	NA	0	0	-1.8144	NA	0	0	-1.31674	NA	0
MAST4	ENSG00000069020	protein_coding	0	0	0.158201	0.794779	0	0	-0.431454	0.50744	0	0	-0.0541869	0.951321	0
ADGRF5	ENSG00000069122	protein_coding	0	0	-1.82281	NA	0	0	NA	NA	0	0	-2.64947	NA	0
SDK2	ENSG00000069188	protein_coding	0	0	0.486319	0.0242834	1	0	-0.363505	0.180295	0	0	-0.106365	0.78292	0
ADAM7	ENSG00000069206	protein_coding	0	0	NA	NA	0	0	NA	NA	0	0	-2.64947	NA	0
NUP133	ENSG00000069248	protein_coding	0	0	0.288792	0.0169695	0	0	0.821013	4.69091e-09	1	0	0.818529	7.91143e-07	1
NUCKS1	ENSG00000069275	protein_coding	0	0	-0.253144	0.00718659	0	0	0.815981	1.41461e-15	1	0	0.819586	1.69639e-10	1
VPS35	ENSG00000069329	protein_coding	0	0	-0.244743	0.0859746	0	0	0.748869	1.93132e-05	1	0	1.24552	2.97674e-10	1
DNAJA2	ENSG00000069345	protein_coding	0	0	-0.388087	0.0176588	0	1	0.752895	9.99549e-05	1	0	1.24313	8.47049e-09	1
BCL3	ENSG00000069399	protein_coding	0	0	0.61637	0.607153	0	0	-0.00945782	0.996592	0	0	0.00959517	0.996344	0
KCNAB2	ENSG00000069424	protein_coding	0	0	0.0565113	0.937283	0	0	0.270535	0.7547	0	0	-0.0880136	0.922774	0
ABCC9	ENSG00000069431	protein_coding	0	0	-0.188569	NA	0	0	-0.189095	NA	0	0	2.36751	NA	0
GAL	ENSG00000069482	protein_coding	0	0	0.474797	0.103752	0	0	-0.484227	0.15633	0	0	-0.564227	0.0974304	0
CLEC2D	ENSG00000069493	protein_coding	0	0	0.890711	0.472741	0	0	-0.919821	0.401253	0	0	-0.736196	0.557823	0
FUNDC1	ENSG00000069509	protein_coding	0	0	-0.571397	0.0890368	0	0	0.256931	0.705263	0	0	0.718014	0.233472	0
MAOB	ENSG00000069535	protein_coding	0	0	2.82384	NA	0	0	1.10606	NA	0	0	1.74978	NA	0
RORA	ENSG00000069667	protein_coding	0	0	-1.03968	0.00157538	0	1	-0.476848	0.469052	0	0	-0.680307	0.233599	0
DRD4	ENSG00000069696	protein_coding	0	0	0.342383	NA	0	0	0.587413	NA	0	0	0.420332	NA	0
TGFBR3	ENSG00000069702	protein_coding	0	0	-0.054429	0.880221	0	0	0.644189	0.0452384	1	0	0.840953	0.0119241	1
KIAA1107	ENSG00000069712	protein_coding	0	0	NA	NA	0	0	NA	NA	0	0	NA	NA	0
PLA2G10	ENSG00000069764	protein_coding	0	0	NA	NA	0	0	-2.24617	NA	0	0	NA	NA	0
HES2	ENSG00000069812	protein_coding	0	0	0.999349	NA	0	0	4.28849	NA	0	0	0.672276	NA	0
ATP1B3	ENSG00000069849	protein_coding	0	0	-0.193678	0.2828	0	0	0.0603372	0.86407	0	0	0.593569	0.0148159	1
NEDD4	ENSG00000069869	protein_coding	0	0	0.0701924	0.890694	0	0	0.588344	0.250696	0	0	1.22392	0.0163411	1
PIGB	ENSG00000069943	protein_coding	0	0	-0.0834332	0.947562	0	0	0.328079	0.8455	0	0	0.614544	0.683474	0
MAPK6	ENSG00000069956	protein_coding	0	0	0.118337	0.671216	0	0	1.056	3.77204e-05	1	0	1.69882	1.42611e-08	1
GNB5	ENSG00000069966	protein_coding	0	0	0.265189	0.646029	0	0	0.222405	0.776382	0	0	0.458781	0.51727	0
RAB27A	ENSG00000069974	protein_coding	0	0	0.434036	0.595326	0	0	0.916081	0.392148	0	0	1.00627	0.35584	0
CECR5	ENSG00000069998	protein_coding	0	0	0.366292	0.11713	0	0	0.051679	0.907374	0	0	0.220542	0.538875	0
UFD1L	ENSG00000070010	protein_coding	0	1	-1.04472	3.40369e-05	0	1	-0.978597	0.00630494	0	1	-1.27386	0.000148435	0
LRP6	ENSG00000070018	protein_coding	0	0	NA	NA	0	0	NA	NA	0	0	NA	NA	0
GUCY2C	ENSG00000070019	protein_coding	0	0	NA	NA	0	0	NA	NA	0	0	NA	NA	0
SCT	ENSG00000070031	protein_coding	0	0	NA	NA	0	0	NA	NA	0	0	NA	NA	0
PHRF1	ENSG00000070047	protein_coding	0	0	2.18381	NA	0	0	1.81122	0.246035	0	0	0.299365	0.854264	0
IKBKAP	ENSG00000070061	protein_coding	1	0	0.78744	1.54941e-08	1	0	1.15378	9.67395e-14	1	0	1.45215	3.12904e-16	1
NUCB2	ENSG00000070081	protein_coding	0	0	-0.598692	0.00875963	0	1	0.316111	0.506328	0	0	0.595357	0.17763	0
PFN2	ENSG00000070087	protein_coding	0	0	-0.610136	7.33758e-06	0	1	0.393123	0.10755	0	0	0.116835	0.712666	0
PTPN3	ENSG00000070159	protein_coding	0	0	-0.161516	0.597034	0	0	0.636095	0.0736412	0	0	0.577129	0.13512	0
SPTB	ENSG00000070182	protein_coding	0	0	0.426818	0.450361	0	0	0.697719	0.3565	0	0	-0.0690731	0.93626	0
DAPP1	ENSG00000070190	protein_coding	0	0	-0.668987	NA	0	0	0.0485261	NA	0	0	-2.39585	NA	0
FGF10	ENSG00000070193	protein_coding	0	0	NA	NA	0	0	NA	NA	0	0	NA	NA	0
SLC44A1	ENSG00000070214	protein_coding	0	0	-0.349063	0.0935714	0	0	0.642408	0.0176432	1	0	0.527568	0.073946	0
TMEM260	ENSG00000070269	protein_coding	0	0	-0.161472	0.799187	0	0	-0.295687	0.664097	0	0	0.238226	0.764366	0
SMG6	ENSG00000070366	protein_coding	0	0	0.714116	0.00188616	1	0	0.34538	0.340709	0	0	0.508593	0.146101	0
EXOC5	ENSG00000070367	protein_coding	0	0	-0.0528289	0.836503	0	0	0.772171	0.000420768	1	0	1.42938	2.99118e-09	1
CLTCL1	ENSG00000070371	protein_coding	0	0	-0.214575	0.534012	0	0	-0.017715	0.978227	0	0	0.335332	0.499612	0
FGF22	ENSG00000070388	protein_coding	0	0	0.572666	NA	0	0	-1.65221	NA	0	0	-0.713337	NA	0
FSTL3	ENSG00000070404	protein_coding	0	0	0.84558	0.297033	0	0	-0.630326	0.460671	0	0	-0.728896	0.36635	0
DGCR2	ENSG00000070413	protein_coding	0	0	0.268339	0.158828	0	0	0.466957	0.052152	0	0	0.398886	0.132396	0
RNF126	ENSG00000070423	protein_coding	0	0	0.0579339	0.863419	0	0	-0.430454	0.110745	0	0	-0.492526	0.103535	0
MNT	ENSG00000070444	protein_coding	0	0	0.145267	0.746918	0	0	-0.462048	0.237147	0	0	-0.608712	0.0976817	0
ZXDC	ENSG00000070476	protein_coding	0	0	0.384861	0.147264	0	0	-0.138469	0.741794	0	0	-0.0758228	0.865904	0
JMJD6	ENSG00000070495	protein_coding	0	0	0.351874	0.283417	0	0	-0.344511	0.414731	0	0	-0.266825	0.554708	0
POLB	ENSG00000070501	protein_coding	0	0	-1.05431	0.000239329	0	1	-0.213157	0.770212	0	0	0.148599	0.850974	0
ST6GALNAC1	ENSG00000070526	protein_coding	0	0	-1.82281	NA	0	0	-3.30555	NA	0	0	NA	NA	0
WIPI1	ENSG00000070540	protein_coding	0	0	-0.31684	0.723198	0	0	-0.483458	0.683644	0	0	-0.43061	0.714889	0
FRMPD1	ENSG00000070601	protein_coding	0	0	0.28715	NA	0	0	0.0150989	NA	0	0	1.46366	NA	0
GBA2	ENSG00000070610	protein_coding	0	0	0.153852	0.549979	0	0	0.0674345	0.87763	0	0	0.0609324	0.886416	0
NDST1	ENSG00000070614	protein_coding	0	0	0.349296	0.0915389	0	0	-0.0189535	0.964691	0	0	-0.127169	0.691477	0
ASNS	ENSG00000070669	protein_coding	0	0	-0.117253	0.509915	0	0	0.395702	0.0161474	1	0	0.681267	0.000104978	1
AP3M2	ENSG00000070718	protein_coding	0	0	-0.11447	0.73161	0	0	0.444052	0.245431	0	0	-0.0615882	0.902084	0
CNGB1	ENSG00000070729	protein_coding	0	0	NA	NA	0	0	-2.24617	NA	0	0	NA	NA	0
ST6GALNAC2	ENSG00000070731	protein_coding	0	0	-0.218613	0.869147	0	0	-1.72112	0.043999	0	1	-1.81254	0.0352296	0
CHAT	ENSG00000070748	protein_coding	0	0	NA	NA	0	0	NA	NA	0	0	NA	NA	0
PABPC1	ENSG00000070756	protein_coding	0	0	-0.117552	0.256828	0	0	0.227181	0.0605105	0	0	0.468755	0.000266128	1
TESK2	ENSG00000070759	protein_coding	0	0	-0.270354	0.580849	0	0	0.215496	0.803965	0	0	-0.0698762	0.935317	0
CFAP20	ENSG00000070761	protein_coding	0	0	-0.132831	0.747338	0	0	0.243148	0.642708	0	0	0.310177	0.537151	0
CSNK2A2	ENSG00000070770	protein_coding	0	0	-0.160105	0.368244	0	0	0.288922	0.220896	0	0	0.617525	0.00767704	1
PTPN21	ENSG00000070778	protein_coding	0	0	0.355554	0.472397	0	0	0.261716	0.695555	0	0	0.354736	0.580121	0
EIF2B3	ENSG00000070785	protein_coding	0	0	0.235083	0.530359	0	0	0.291752	0.576147	0	0	0.559268	0.247053	0
CAMK2A	ENSG00000070808	protein_coding	0	0	NA	NA	0	0	NA	NA	0	0	NA	NA	0
TCOF1	ENSG00000070814	protein_coding	1	0	0.725712	2.8708e-08	1	0	0.648932	3.46605e-05	1	0	0.893067	4.34168e-08	1
CDC42	ENSG00000070831	protein_coding	0	0	-0.827668	8.969e-11	0	1	0.483614	0.00949251	1	0	0.554593	0.00888381	1
OSBPL3	ENSG00000070882	protein_coding	0	0	-0.226294	0.481045	0	0	0.18983	0.701797	0	0	0.369473	0.408571	0
EPHA8	ENSG00000070886	protein_coding	0	0	-0.206937	0.773398	0	0	-0.0299464	0.979641	0	0	-0.239891	0.779606	0
SLC12A3	ENSG00000070915	protein_coding	0	0	0.342383	NA	0	0	0.587413	NA	0	0	-0.954976	NA	0
RAD18	ENSG00000070950	protein_coding	0	0	-0.532965	0.0235654	0	1	0.220734	0.628168	0	0	0.208446	0.683347	0
ATP2B1	ENSG00000070961	protein_coding	0	0	0.214325	0.25745	0	0	1.14497	1.65751e-10	1	0	1.64954	3.43887e-15	1
TRPM5	ENSG00000070985	protein_coding	0	0	-0.0491332	NA	0	0	-1.8248	NA	0	0	-1.55229	NA	0
NCK2	ENSG00000071051	protein_coding	0	0	0.509402	0.0617776	0	0	0.484014	0.222441	0	0	0.425439	0.30549	0
MAP4K4	ENSG00000071054	protein_coding	0	0	0.258305	0.120116	0	0	0.534128	0.00217937	1	0	0.657908	0.000487566	1
MGAT4A	ENSG00000071073	protein_coding	0	0	-0.423642	0.219549	0	0	1.02018	0.0559047	0	0	0.766989	0.175364	0
RPL31	ENSG00000071082	protein_coding	0	1	-0.509591	0.000104841	0	1	-1.23952	2.16938e-20	0	1	-0.753576	5.76862e-06	0
WDR1	ENSG00000071127	protein_coding	0	0	-0.0242225	0.928561	0	0	0.020606	0.955407	0	0	0.0399913	0.91159	0
SNX13	ENSG00000071189	protein_coding	0	0	-0.225057	0.396163	0	0	0.419087	0.224965	0	0	0.664505	0.0539962	0
MS4A12	ENSG00000071203	protein_coding	0	0	NA	NA	0	0	NA	NA	0	0	-2.64947	NA	0
ARHGAP10	ENSG00000071205	protein_coding	0	0	-0.184675	0.683527	0	0	0.213002	0.746464	0	0	0.243789	0.715722	0
RPS6KA2	ENSG00000071242	protein_coding	0	0	0.663483	0.0244673	1	0	-0.193944	0.674955	0	0	-0.51683	0.143806	0
ING3	ENSG00000071243	protein_coding	0	0	-0.287832	0.298412	0	0	0.906186	0.0173942	1	0	1.32942	0.000689309	1
VASH1	ENSG00000071246	protein_coding	0	0	0.171492	0.665488	0	0	-0.313961	0.487881	0	0	-0.444736	0.310213	0
LMCD1	ENSG00000071282	protein_coding	0	0	-0.867216	0.459769	0	0	0.0147186	NA	0	0	-0.97635	0.543144	0
WBSCR22	ENSG00000071462	protein_coding	0	0	0.0877878	0.75173	0	0	0.110195	0.766635	0	0	0.00926712	0.983249	0
SEL1L	ENSG00000071537	protein_coding	1	0	0.505138	0.00269508	1	0	1.15148	3.02551e-07	1	0	1.19072	7.25544e-07	1
TRIP13	ENSG00000071539	protein_coding	0	0	-0.148419	0.551368	0	0	0.0592726	0.890151	0	0	0.186293	0.609147	0
ATP6AP1	ENSG00000071553	protein_coding	0	0	0.0478611	0.874467	0	0	-0.419006	0.0346287	0	1	-0.736723	8.60369e-05	0
TCF3	ENSG00000071564	protein_coding	0	0	0.487787	0.00193844	1	0	0.0904134	0.770684	0	0	0.0244032	0.94602	0
TRIB2	ENSG00000071575	protein_coding	0	0	0.41723	0.268283	0	0	0.597422	0.237591	0	0	0.259717	0.644573	0
DAZAP1	ENSG00000071626	protein_coding	0	0	0.438474	0.0154965	1	0	-0.0621828	0.846197	0	0	-0.161376	0.532951	0
MBD3	ENSG00000071655	protein_coding	0	0	0.464307	0.0410581	1	0	-0.0434536	0.911153	0	0	-0.250342	0.351533	0
PRLH	ENSG00000071677	protein_coding	0	0	NA	NA	0	0	NA	NA	0	0	NA	NA	0
HLTF	ENSG00000071794	protein_coding	0	0	-0.0920864	0.675113	0	0	1.05325	4.25462e-11	1	0	1.79474	3.13536e-21	1
FAM50A	ENSG00000071859	protein_coding	0	0	0.107526	0.727057	0	0	-0.545691	0.019261	0	1	-0.338509	0.265288	0
FAM3A	ENSG00000071889	protein_coding	0	0	0.269443	0.307673	0	0	-0.321197	0.313971	0	0	-0.17525	0.648233	0
CPSF1	ENSG00000071894	protein_coding	0	0	0.119289	0.550519	0	0	-0.460457	0.0117938	0	1	-0.470571	0.0331672	0
MYO3B	ENSG00000071909	protein_coding	0	0	NA	NA	0	0	NA	NA	0	0	NA	NA	0
CYBRD1	ENSG00000071967	protein_coding	0	0	-0.615758	0.357879	0	0	-0.0790276	0.95851	0	0	-0.107323	0.936219	0
CDH19	ENSG00000071991	protein_coding	0	0	NA	NA	0	0	NA	NA	0	0	NA	NA	0
PDCD2	ENSG00000071994	protein_coding	0	0	0.165978	0.393357	0	0	0.415612	0.0573505	0	0	0.808866	0.000327033	1
SLC6A15	ENSG00000072041	protein_coding	0	0	-0.0344414	0.888229	0	0	0.793793	1.18164e-05	1	0	0.96677	2.69621e-06	1
RDH11	ENSG00000072042	protein_coding	0	0	-0.329474	0.094067	0	0	0.714039	0.00868434	1	0	1.13775	8.7991e-05	1
PRKACA	ENSG00000072062	protein_coding	0	0	0.22329	0.413886	0	0	-0.182576	0.599086	0	0	-0.325628	0.280453	0
ADGRL1	ENSG00000072071	protein_coding	0	0	0.641408	0.000516364	1	0	-0.371082	0.0887984	0	0	-0.696652	0.000362489	0
SPP2	ENSG00000072080	protein_coding	0	0	NA	NA	0	0	NA	NA	0	0	NA	NA	0
ACTN1	ENSG00000072110	protein_coding	0	0	0.348211	0.0612742	0	0	-0.229822	0.402815	0	0	-0.0264764	0.94872	0
ZFYVE26	ENSG00000072121	protein_coding	0	0	0.431685	0.0609529	0	0	0.3408	0.278569	0	0	0.361533	0.264286	0
RPS6KA6	ENSG00000072133	protein_coding	0	0	-0.0464659	0.92609	0	0	0.711593	0.121708	0	0	1.04572	0.0386239	1
EPN2	ENSG00000072134	protein_coding	0	0	0.418599	0.156285	0	0	0.240494	0.568083	0	0	0.109555	0.814671	0
PTPN18	ENSG00000072135	protein_coding	0	0	0.017063	0.973887	0	0	-0.202012	0.676358	0	0	-0.504719	0.164154	0
LIMS2	ENSG00000072163	protein_coding	0	0	0.549919	NA	0	0	-0.633974	NA	0	0	-0.940601	NA	0
ASIC4	ENSG00000072182	protein_coding	0	0	0.471151	NA	0	0	-1.13767	NA	0	0	-1.3828	NA	0
SPEG	ENSG00000072195	protein_coding	0	0	0.450193	0.340115	0	0	-0.516391	0.288835	0	0	-0.967067	0.0129017	0
LNX1	ENSG00000072201	protein_coding	0	0	0.0948957	NA	0	0	0.421599	NA	0	0	0.658698	NA	0
ALDH3A2	ENSG00000072210	protein_coding	0	0	0.233171	0.291923	0	0	0.611945	0.0214508	1	0	0.641105	0.0254918	1
TFRC	ENSG00000072274	protein_coding	0	0	-0.0856504	0.67405	0	0	0.885392	6.59761e-07	1	0	0.913823	1.03214e-05	1
SREBF1	ENSG00000072310	protein_coding	0	0	0.741584	0.000719034	1	0	-0.240692	0.43866	0	0	-0.39614	0.161832	0
TRPC5	ENSG00000072315	protein_coding	0	0	-2.64393	NA	0	0	-4.24461	NA	0	0	-3.22928	NA	0
AFF4	ENSG00000072364	protein_coding	0	0	0.0888506	0.653958	0	0	0.534686	0.00378088	1	0	0.911552	9.67887e-06	1
UBE2D1	ENSG00000072401	protein_coding	0	0	-0.0907616	0.862206	0	0	0.0289347	0.970587	0	0	1.12224	0.039542	1
MPP5	ENSG00000072415	protein_coding	0	0	0.112572	0.681304	0	0	0.895638	0.00105086	1	0	1.2741	3.10513e-05	1
RHOBTB1	ENSG00000072422	protein_coding	0	0	0.484094	0.0751255	0	0	1.10746	0.00177615	1	0	1.11724	0.00298833	1
SMC1A	ENSG00000072501	protein_coding	1	0	0.722735	5.88706e-14	1	0	0.875271	7.78055e-15	1	0	1.21431	9.34934e-16	1
HSD17B10	ENSG00000072506	protein_coding	0	0	0.234292	0.396163	0	0	-0.287961	0.368883	0	0	-0.234243	0.503232	0
MARK2	ENSG00000072518	protein_coding	0	0	0.399447	0.0422011	1	0	0.2343	0.428712	0	0	0.561453	0.0331654	1
HMMR	ENSG00000072571	protein_coding	0	0	-0.567015	0.0297063	0	1	0.524227	0.164107	0	0	0.768447	0.0410031	1
CHFR	ENSG00000072609	protein_coding	0	0	0.123665	0.801128	0	0	-0.306334	0.544842	0	0	-0.295622	0.553901	0
TRHDE	ENSG00000072657	protein_coding	0	0	-0.338134	0.819069	0	0	0.840105	NA	0	0	-0.325913	0.870522	0
P4HA2	ENSG00000072682	protein_coding	0	0	0.370231	0.366349	0	0	0.493457	0.325893	0	0	0.476958	0.354776	0
FCGR2B	ENSG00000072694	protein_coding	0	0	NA	NA	0	0	NA	NA	0	0	-2.39584	NA	0
NFATC3	ENSG00000072736	protein_coding	0	0	0.0007237	0.999016	0	0	-0.0528865	0.922594	0	0	0.0341948	0.947754	0
TRNT1	ENSG00000072756	protein_coding	0	0	-0.268402	0.529357	0	0	0.126263	0.872262	0	0	0.921344	0.13334	0
ACADVL	ENSG00000072778	protein_coding	0	0	0.101463	0.767539	0	0	-0.914036	6.35486e-05	0	1	-0.798943	0.00558684	0
STK10	ENSG00000072786	protein_coding	0	0	0.938706	4.44836e-05	1	0	0.401846	0.238862	0	0	0.343021	0.327635	0
FBXW11	ENSG00000072803	protein_coding	1	0	0.405728	0.0037155	1	0	1.49003	1.57288e-17	1	0	1.49338	1.00222e-14	1
ACAP1	ENSG00000072818	protein_coding	0	0	-0.241352	0.808173	0	0	-0.982174	0.285252	0	0	-1.68749	0.0118478	0
CRMP1	ENSG00000072832	protein_coding	0	0	-0.0987045	0.831371	0	0	0.265272	0.636311	0	0	-0.511235	0.224368	0
EVC	ENSG00000072840	protein_coding	0	0	0.372053	0.281001	0	0	-0.242727	0.63422	0	0	0.0284003	0.965609	0
DERL2	ENSG00000072849	protein_coding	0	0	-0.133311	0.715739	0	0	0.312486	0.519089	0	0	0.104702	0.845072	0
SIDT1	ENSG00000072858	protein_coding	0	0	-0.359795	NA	0	0	-1.43678	NA	0	0	-0.436821	NA	0
NDE1	ENSG00000072864	protein_coding	0	0	NA	NA	0	0	NA	NA	0	0	NA	NA	0
MRVI1	ENSG00000072952	protein_coding	0	0	-0.158044	NA	0	0	-2.09398	NA	0	0	0.0409257	NA	0
TMEM38A	ENSG00000072954	protein_coding	0	0	0.433711	0.616623	0	0	0.600673	0.604606	0	0	-0.453937	0.636619	0
AP1M1	ENSG00000072958	protein_coding	0	0	0.122396	0.694648	0	0	-0.249211	0.421338	0	0	-0.573679	0.0222458	0
PVR	ENSG00000073008	protein_coding	0	0	0.0361073	0.924814	0	0	-0.0209287	0.970637	0	0	0.0494846	0.922774	0
XRCC1	ENSG00000073050	protein_coding	0	0	0.412929	0.239435	0	0	-0.0135627	0.984563	0	0	0.0475467	0.938852	0
SCARB1	ENSG00000073060	protein_coding	0	0	0.143645	0.667764	0	0	-0.730327	0.00319736	0	1	-0.830496	0.0011647	0
CYP2W1	ENSG00000073067	protein_coding	0	0	0.253501	NA	0	0	-1.98828	NA	0	0	-1.55149	NA	0
MCM2	ENSG00000073111	protein_coding	1	0	0.819902	7.93321e-21	1	0	0.771564	2.16342e-12	1	0	0.889674	1.08809e-09	1
MOV10L1	ENSG00000073146	protein_coding	0	0	0.340692	NA	0	0	0.588662	NA	0	0	-3.31591	NA	0
PANX2	ENSG00000073150	protein_coding	0	0	0.583247	0.393831	0	0	-0.490583	0.499464	0	0	-0.559143	0.42403	0
SELENOO	ENSG00000073169	protein_coding	0	0	0.326423	0.482899	0	0	-0.67252	0.130601	0	0	-0.723384	0.102141	0
TP63	ENSG00000073282	protein_coding	0	0	NA	NA	0	0	NA	NA	0	0	NA	NA	0
ALPK1	ENSG00000073331	protein_coding	0	0	0.470156	0.349898	0	0	0.536007	0.431801	0	0	0.621697	0.338375	0
LLGL2	ENSG00000073350	protein_coding	0	0	0.265614	0.648824	0	0	-0.610472	0.285816	0	0	-0.786732	0.126918	0
PDE8A	ENSG00000073417	protein_coding	0	0	-0.229147	0.433403	0	0	0.050264	0.933022	0	0	-0.0445957	0.936219	0
CLCN4	ENSG00000073464	protein_coding	0	0	1.25552	NA	0	0	1.94331	NA	0	0	1.13984	NA	0
NLE1	ENSG00000073536	protein_coding	0	0	0.615053	0.0108382	1	0	-0.159543	0.695716	0	0	-0.409457	0.199985	0
SDHA	ENSG00000073578	protein_coding	1	0	0.382151	0.00527825	1	0	0.416513	0.0211091	1	0	0.500516	0.017045	1
SMARCE1	ENSG00000073584	protein_coding	0	0	0.186968	0.474208	0	0	0.578045	0.0573937	0	0	1.06374	0.00226768	1
FNDC8	ENSG00000073598	protein_coding	0	0	-2.39561	NA	0	0	-4.28014	NA	0	0	-4.3564	NA	0
GSDMB	ENSG00000073605	protein_coding	0	0	-0.137803	0.924814	0	0	-1.51253	0.120239	0	0	-1.50942	0.135191	0
KDM5A	ENSG00000073614	protein_coding	1	0	0.411946	0.00356311	1	0	1.17219	2.42989e-11	1	0	1.01613	6.85263e-07	1
ADAM11	ENSG00000073670	protein_coding	0	0	0.426331	0.231531	0	0	-0.383355	0.352434	0	0	-0.670813	0.0646755	0
PPP2R3A	ENSG00000073711	protein_coding	0	0	-0.230365	0.655666	0	0	0.458856	0.52667	0	0	0.840981	0.224628	0
FERMT2	ENSG00000073712	protein_coding	0	0	0.156888	0.472741	0	0	0.790816	0.00106082	1	0	1.06553	4.52867e-05	1
ABCB11	ENSG00000073734	protein_coding	0	0	NA	NA	0	0	NA	NA	0	0	-2.39584	NA	0
DHRS9	ENSG00000073737	protein_coding	0	0	NA	NA	0	0	NA	NA	0	0	NA	NA	0
CD5L	ENSG00000073754	protein_coding	0	0	NA	NA	0	0	NA	NA	0	0	-2.39584	NA	0
PTGS2	ENSG00000073756	protein_coding	0	0	0.0701489	0.965095	0	0	-0.139151	0.950439	0	0	1.4364	0.455045	0
IGF2BP2	ENSG00000073792	protein_coding	0	0	-0.0213444	0.957451	0	0	-0.322457	0.299716	0	0	-0.260264	0.444014	0
MAP3K13	ENSG00000073803	protein_coding	0	0	-0.831313	0.00882166	0	1	-0.313751	0.67235	0	0	0.196095	0.814624	0
ST6GAL1	ENSG00000073849	protein_coding	0	0	0.308869	0.482711	0	0	0.390196	0.510972	0	0	0.0420614	0.954518	0
TBX21	ENSG00000073861	protein_coding	0	0	-0.283917	NA	0	0	1.03039	NA	0	0	-0.390058	NA	0
VDAC1P1	ENSG00000073905	processed_pseudogene	0	0	0.262698	0.797247	0	0	0.884362	0.492692	0	0	0.364159	0.801407	0
FRY	ENSG00000073910	protein_coding	0	0	0.778672	0.16749	0	0	0.349757	0.685489	0	0	0.124274	0.892416	0
PICALM	ENSG00000073921	protein_coding	0	0	-0.152125	0.511724	0	0	0.224425	0.463899	0	0	0.810107	0.00252002	1
NSF	ENSG00000073969	protein_coding	0	0	0.975287	NA	0	0	1.38445	NA	0	0	-0.570104	0.741337	0
GLI2	ENSG00000074047	protein_coding	0	0	0.697588	0.115055	0	0	-0.344711	0.544688	0	0	0.092534	0.90159	0
CLASP1	ENSG00000074054	protein_coding	0	0	0.13751	0.514994	0	0	0.477596	0.0398054	1	0	0.650484	0.00940724	1
MRPS34	ENSG00000074071	protein_coding	0	0	0.711323	1.11213e-05	1	0	-0.0309355	0.927307	0	0	0.214944	0.403478	0
NOTCH3	ENSG00000074181	protein_coding	0	0	0.0323557	0.922199	0	0	-0.318632	0.261157	0	0	-0.712348	0.00311032	0
CLNS1A	ENSG00000074201	protein_coding	0	0	0.0927914	0.659246	0	0	0.494951	0.0125944	1	0	1.07937	4.20799e-07	1
PPP2R2C	ENSG00000074211	protein_coding	0	0	-0.417275	0.407459	0	0	0.321208	0.715935	0	0	0.566909	0.491634	0
TEAD2	ENSG00000074219	protein_coding	0	0	0.2931	0.481482	0	0	0.285038	0.607808	0	0	-0.283702	0.575927	0
EED	ENSG00000074266	protein_coding	0	0	0.175929	0.597264	0	0	0.311631	0.444402	0	0	0.602083	0.108883	0
CDHR2	ENSG00000074276	protein_coding	0	0	-0.426209	0.766141	0	0	-1.40052	0.265299	0	0	-1.47202	0.276564	0
SNCB	ENSG00000074317	protein_coding	0	0	0.30862	0.720738	0	0	0.273188	0.830145	0	0	-0.160422	0.890884	0
TSG101	ENSG00000074319	protein_coding	0	0	-0.563627	0.0135068	0	1	0.069119	0.906694	0	0	-0.00481492	0.993685	0
NCBP3	ENSG00000074356	protein_coding	0	0	0.217896	0.210719	0	0	0.484352	0.0211945	1	0	0.32818	0.16677	0
ATP2A3	ENSG00000074370	protein_coding	0	0	1.12223	0.0128804	1	0	0.375758	0.584903	0	0	0.21421	0.763565	0
CA12	ENSG00000074410	protein_coding	0	0	0.553422	0.32114	0	0	0.323666	0.699277	0	0	0.618803	0.409904	0
MGLL	ENSG00000074416	protein_coding	0	0	-0.2654	0.862067	0	0	-0.856524	0.565361	0	0	-0.161917	0.936418	0
NTN4	ENSG00000074527	protein_coding	0	0	0.184085	0.841987	0	0	0.778431	0.492223	0	0	0.545029	0.623638	0
BCS1L	ENSG00000074582	protein_coding	0	0	-0.362227	0.203569	0	0	-0.252414	0.60191	0	0	-0.25699	0.574682	0
NUAK1	ENSG00000074590	protein_coding	0	0	0.26426	0.367843	0	0	0.800422	0.0217032	1	0	0.960999	0.00852979	1
DPP8	ENSG00000074603	protein_coding	0	0	-0.355676	0.0913514	0	0	0.34954	0.300888	0	0	0.766622	0.0145613	1
SLC24A1	ENSG00000074621	protein_coding	0	0	0.325669	0.365546	0	0	0.076381	0.916414	0	0	-0.412791	0.334783	0
ZNF532	ENSG00000074657	protein_coding	0	0	0.524771	0.150322	0	0	0.284036	0.621251	0	0	0.403347	0.447831	0
SCARF1	ENSG00000074660	protein_coding	0	0	NA	NA	0	0	NA	NA	0	0	NA	NA	0
LMAN1	ENSG00000074695	protein_coding	0	0	-0.244811	0.128004	0	0	0.621273	0.00115717	1	0	1.01162	5.94422e-07	1
HACD3	ENSG00000074696	protein_coding	0	0	-0.376912	0.000910338	0	1	0.487573	0.00547405	1	0	0.713205	0.000186133	1
IPCEF1	ENSG00000074706	protein_coding	0	0	0.96371	NA	0	0	-1.06334	NA	0	0	1.61696	NA	0
ZZEF1	ENSG00000074755	protein_coding	0	0	0.714788	4.12802e-06	1	0	0.459942	0.0246447	1	0	0.403396	0.0747582	0
NOX3	ENSG00000074771	protein_coding	0	0	NA	NA	0	0	NA	NA	0	0	NA	NA	0
ENO1	ENSG00000074800	protein_coding	0	0	-0.163998	0.263553	0	0	-0.197484	0.263177	0	0	-0.415114	0.00799519	0
SLC12A1	ENSG00000074803	protein_coding	0	0	NA	NA	0	0	-5.04416	NA	0	0	-3.24543	NA	0
MYDGF	ENSG00000074842	protein_coding	0	0	0.251541	0.33171	0	0	-0.057	0.901584	0	0	0.130412	0.755465	0
ANO8	ENSG00000074855	protein_coding	0	0	0.564463	0.187327	0	0	-0.577011	0.205154	0	0	-0.80554	0.045235	0
TUBE1	ENSG00000074935	protein_coding	0	0	-0.391639	0.198758	0	0	-0.42612	0.318831	0	0	-0.0526195	0.936685	0
ARHGEF10L	ENSG00000074964	protein_coding	0	0	0.457827	0.475551	0	0	0.623758	0.460671	0	0	0.166295	0.857152	0
TXK	ENSG00000074966	protein_coding	0	0	-1.82281	NA	0	0	-2.43178	NA	0	0	-4.36972	NA	0
WSCD2	ENSG00000075035	protein_coding	0	0	NA	NA	0	0	NA	NA	0	0	NA	NA	0
KCNQ2	ENSG00000075043	protein_coding	0	0	-0.0441849	0.943691	0	0	-0.40957	0.526549	0	0	-1.02601	0.014548	0
TACR2	ENSG00000075073	protein_coding	0	0	0.063729	NA	0	0	-1.23933	NA	0	0	-0.31267	NA	0
ACTR6	ENSG00000075089	protein_coding	0	0	-0.0416498	0.923065	0	0	1.16401	0.000732348	1	0	1.85267	4.84517e-07	1
TIPIN	ENSG00000075131	protein_coding	0	0	0.14491	0.608139	0	0	0.636662	0.0368553	1	0	1.0425	0.00562425	1
SRI	ENSG00000075142	protein_coding	0	0	-0.558213	0.0330616	0	1	-0.553991	0.150814	0	0	-0.147955	0.789886	0
EIF4G3	ENSG00000075151	protein_coding	0	0	-0.155231	0.388968	0	0	0.240239	0.346661	0	0	0.630248	0.00407559	1
NUP37	ENSG00000075188	protein_coding	0	0	-0.399518	0.196099	0	0	0.350396	0.521184	0	0	0.426718	0.460075	0
SEMA3A	ENSG00000075213	protein_coding	0	0	0.297384	0.694933	0	0	1.45458	0.0821765	0	0	1.52788	0.0932523	0
GTSE1	ENSG00000075218	protein_coding	0	0	0.5964	0.00613684	1	0	0.252574	0.46672	0	0	0.177259	0.631123	0
SEMA3C	ENSG00000075223	protein_coding	0	0	-0.00890957	0.988482	0	0	1.21216	0.0247999	1	0	0.989182	0.0814317	0
TTC38	ENSG00000075234	protein_coding	0	0	0.385808	0.321239	0	0	-0.236356	0.662435	0	0	-0.674473	0.0933255	0
ACAT1	ENSG00000075239	protein_coding	0	0	0.199246	0.315733	0	0	0.686946	0.00211836	1	0	1.12872	3.12614e-06	1
GRAMD4	ENSG00000075240	protein_coding	0	0	0.323416	0.299451	0	0	0.530108	0.188293	0	0	0.355421	0.410881	0
CELSR1	ENSG00000075275	protein_coding	0	0	0.527608	0.018392	1	0	-0.171906	0.632766	0	0	-0.166074	0.648254	0
WNT8B	ENSG00000075290	protein_coding	0	0	-0.249954	NA	0	0	-1.2624	NA	0	0	-1.32537	0.400886	0
ZNF638	ENSG00000075292	protein_coding	0	0	-0.175502	0.432471	0	0	0.516343	0.36048	0	0	0.898924	0.000105302	1
SLC25A40	ENSG00000075303	protein_coding	0	0	-0.653117	0.0510643	0	0	0.465682	0.482058	0	0	0.658958	0.288651	0
TIMM21	ENSG00000075336	protein_coding	0	0	-0.328087	0.464513	0	0	0.0357188	0.968049	0	0	0.418313	0.523602	0
ADD2	ENSG00000075340	protein_coding	0	0	0.50453	0.0284364	1	0	-0.0106013	0.981617	0	0	0.436723	0.157239	0
FGF4	ENSG00000075388	protein_coding	0	0	NA	NA	0	0	NA	NA	0	0	NA	NA	0
RASAL2	ENSG00000075391	protein_coding	0	0	0.107219	0.744438	0	0	0.0861777	0.855778	0	0	0.168721	0.685856	0
VPS9D1	ENSG00000075399	protein_coding	0	0	-0.0494648	0.962475	0	0	-0.214095	0.856696	0	0	-0.805291	0.302554	0
ZNF37A	ENSG00000075407	protein_coding	0	0	0.0427946	0.925798	0	0	-0.0339257	0.961004	0	0	0.548578	0.231094	0
MARK3	ENSG00000075413	protein_coding	0	0	0.252793	0.203141	0	0	0.657229	0.00148465	1	0	0.861292	4.60713e-05	1
SLC25A3	ENSG00000075415	protein_coding	0	0	0.0127118	0.95091	0	0	-0.00875106	0.973688	0	0	0.258637	0.138481	0
FNDC3B	ENSG00000075420	protein_coding	0	0	-0.151562	0.707139	0	0	-0.108031	0.868066	0	0	0.173302	0.769532	0
FOSL2	ENSG00000075426	protein_coding	0	0	0.113052	0.893893	0	0	-0.120147	0.915986	0	0	-0.166572	0.86878	0
CACNG5	ENSG00000075429	protein_coding	0	0	2.37896	NA	0	0	4.04815	NA	0	0	0.902329	NA	0
CACNG4	ENSG00000075461	protein_coding	0	0	-0.704334	NA	0	0	-2.36843	NA	0	0	-1.1304	NA	0
FRYL	ENSG00000075539	protein_coding	0	0	-0.147716	0.684404	0	0	0.214408	0.620652	0	0	0.664043	0.0697762	0
TMEM131	ENSG00000075568	protein_coding	0	0	-0.29345	0.142635	0	0	-0.0125443	0.979189	0	0	0.165733	0.645662	0
FSCN1	ENSG00000075618	protein_coding	0	0	0.0155098	0.960311	0	0	0.145868	0.585496	0	0	-0.386469	0.0726304	0
ACTB	ENSG00000075624	protein_coding	0	0	0.317362	0.0429951	1	0	-0.215007	0.0594022	0	0	0.0799251	0.650893	0
MOCOS	ENSG00000075643	protein_coding	0	0	0.256388	0.362911	0	0	0.419162	0.31796	0	0	0.572458	0.116067	0
PLD1	ENSG00000075651	protein_coding	0	0	0.17881	0.756604	0	0	0.409457	0.586858	0	0	1.26943	0.0664188	0
ATP12A	ENSG00000075673	protein_coding	0	0	0.669445	NA	0	0	0.166329	NA	0	0	-0.77167	NA	0
WDR62	ENSG00000075702	protein_coding	0	0	0.216599	0.531773	0	0	-0.330504	0.312032	0	0	-0.43355	0.152086	0
DLG1	ENSG00000075711	protein_coding	0	0	-0.301356	0.166589	0	0	0.604385	0.0420489	1	0	0.680242	0.0324144	1
RAB7A	ENSG00000075785	protein_coding	0	0	0.061886	0.766709	0	0	0.41289	0.0368553	1	0	0.436582	0.0430249	1
BCAP29	ENSG00000075790	protein_coding	0	0	-0.160272	0.639658	0	0	0.424686	0.361016	0	0	0.619559	0.176123	0
SEC31B	ENSG00000075826	protein_coding	0	0	0.136157	0.894179	0	0	-1.28507	0.0331903	0	1	-1.73896	0.00154034	0
SART3	ENSG00000075856	protein_coding	1	0	0.691353	1.96805e-06	1	0	0.722509	0.000151722	1	0	0.987084	1.10225e-05	1
ARHGAP15	ENSG00000075884	protein_coding	0	0	NA	NA	0	0	NA	NA	0	0	NA	NA	0
TUBA3D	ENSG00000075886	protein_coding	0	0	-0.568271	NA	0	0	-1.18878	NA	0	0	-1.01342	0.597137	0
PAX2	ENSG00000075891	protein_coding	0	0	-0.366991	0.658698	0	0	0.123618	0.935326	0	0	-1.0348	0.200181	0
EXOSC7	ENSG00000075914	protein_coding	0	0	-0.0493103	0.919176	0	0	-0.0304702	0.966417	0	0	-0.181664	0.736024	0
KIFAP3	ENSG00000075945	protein_coding	1	0	0.463782	0.0432679	1	0	1.07694	0.000271306	1	0	1.56137	2.10464e-06	1
MKRN2	ENSG00000075975	protein_coding	0	0	0.0130746	0.970854	0	0	0.587477	0.0421157	1	0	0.670554	0.0290421	1
MCM6	ENSG00000076003	protein_coding	1	0	0.433015	0.000162413	1	0	1.00586	1.19016e-13	1	0	1.71725	5.09358e-26	1
REXO2	ENSG00000076043	protein_coding	0	0	-0.284565	0.529078	0	0	-0.290015	0.663476	0	0	0.908877	0.174929	0
RBM7	ENSG00000076053	protein_coding	0	0	-0.598698	0.0854412	0	0	0.463065	0.465269	0	0	0.723187	0.287351	0
RBMS2	ENSG00000076067	protein_coding	0	0	0.0250059	0.966202	0	0	0.127829	0.844416	0	0	-0.520638	0.261296	0
BAZ2A	ENSG00000076108	protein_coding	0	0	0.139586	0.481488	0	0	0.0641273	0.820428	0	0	0.107512	0.684299	0
PTPN23	ENSG00000076201	protein_coding	0	0	0.257718	0.410199	0	0	-0.388181	0.250938	0	0	-0.191799	0.64215	0
MLH1	ENSG00000076242	protein_coding	0	0	-0.851323	NA	0	0	-0.135667	NA	0	0	-0.968822	NA	0
UNG	ENSG00000076248	protein_coding	0	0	0.0708734	0.735885	0	0	0.564887	0.0027485	1	0	0.31825	0.165823	0
FMO4	ENSG00000076258	protein_coding	0	0	-0.346293	NA	0	0	-0.268497	NA	0	0	-0.725434	0.690445	0
KLHL20	ENSG00000076321	protein_coding	0	0	0.0691464	0.879803	0	0	0.45561	0.340709	0	0	1.00206	0.0286917	1
RGS11	ENSG00000076344	protein_coding	0	0	0.849766	NA	0	0	-1.51205	NA	0	0	2.42069	NA	0
SLC46A1	ENSG00000076351	protein_coding	0	0	0.601657	0.316587	0	0	-0.306652	0.700967	0	0	-0.192872	0.819831	0
PLXNA2	ENSG00000076356	protein_coding	0	0	1.02447	0.00556061	1	0	-0.150881	0.803922	0	0	-0.591174	0.199938	0
SPAG5	ENSG00000076382	protein_coding	1	0	0.685856	0.000385854	1	0	0.570362	0.0184642	1	0	0.7896	0.00184831	1
ANKRD13A	ENSG00000076513	protein_coding	0	0	-0.189387	0.454558	0	0	0.417188	0.206461	0	0	0.739127	0.021638	1
TPD52	ENSG00000076554	protein_coding	0	0	-1.06025	6.06068e-06	0	1	0.0124402	0.987297	0	0	0.460195	0.45778	0
ACACB	ENSG00000076555	protein_coding	0	0	-0.111939	0.809762	0	0	-0.321184	0.508963	0	0	-0.481556	0.266753	0
TRAF4	ENSG00000076604	protein_coding	0	0	0.0497827	0.897954	0	0	-0.0182626	0.974092	0	0	-0.386764	0.266358	0
PAG1	ENSG00000076641	protein_coding	0	0	-0.128302	0.674912	0	0	0.57225	0.0989922	0	0	0.465235	0.220878	0
GPATCH1	ENSG00000076650	protein_coding	0	0	0.405812	0.309455	0	0	1.06665	0.027734	1	0	0.968764	0.0624668	0
ICAM3	ENSG00000076662	protein_coding	0	0	0.342383	NA	0	0	-0.971754	NA	0	0	-2.03505	NA	0
NT5C2	ENSG00000076685	protein_coding	0	0	-0.21489	0.64413	0	0	0.291693	0.636924	0	0	0.571554	0.306535	0
MCAM	ENSG00000076706	protein_coding	0	0	0.315973	0.273906	0	0	0.234286	0.586618	0	0	0.310442	0.456279	0
GPC4	ENSG00000076716	protein_coding	0	0	0.381891	0.098868	0	0	0.568451	0.0579624	0	0	0.530412	0.0989643	0
MBNL3	ENSG00000076770	protein_coding	0	0	-0.581718	0.00122095	0	1	0.176852	0.662748	0	0	0.661685	0.100302	0
CAMSAP3	ENSG00000076826	protein_coding	0	0	0.535117	0.158761	0	0	-0.341977	0.501898	0	0	-0.889399	0.0159543	0
RAP1GAP	ENSG00000076864	protein_coding	0	0	0.313224	0.607153	0	0	0.0193079	0.985938	0	0	0.0997774	0.91907	0
XAB2	ENSG00000076924	protein_coding	0	0	0.300527	0.242744	0	0	0.243716	0.458511	0	0	0.182095	0.636774	0
ARHGEF1	ENSG00000076928	protein_coding	0	0	0.391787	0.149776	0	0	0.0507734	0.919449	0	0	-0.112509	0.788544	0
STXBP2	ENSG00000076944	protein_coding	0	0	0.058134	0.942173	0	0	-0.0773956	0.943744	0	0	-0.4199	0.574986	0
MAP2K7	ENSG00000076984	protein_coding	0	0	0.161061	0.548497	0	0	-0.0134697	0.977609	0	0	-0.277441	0.417347	0
NMRK2	ENSG00000077009	protein_coding	0	0	-0.0937692	NA	0	0	-0.860175	NA	0	0	-0.554264	NA	0
DGKD	ENSG00000077044	protein_coding	0	0	0.453254	0.0945981	0	0	-0.180379	0.634619	0	0	-0.236929	0.546088	0
CTTNBP2	ENSG00000077063	protein_coding	0	0	-0.110961	0.895398	0	0	-0.0414681	0.972067	0	0	-0.233162	0.783689	0
ACTL6B	ENSG00000077080	protein_coding	0	0	1.17791	NA	0	0	-0.391255	NA	0	0	1.35702	NA	0
RARB	ENSG00000077092	protein_coding	0	0	-0.387419	0.306815	0	0	0.233151	0.734261	0	0	0.822899	0.172093	0
TOP2B	ENSG00000077097	protein_coding	0	0	0.0946393	0.631285	0	0	1.19249	1.77311e-19	1	0	1.63171	1.1072e-26	1
TM9SF3	ENSG00000077147	protein_coding	0	0	0.0565451	0.814861	0	0	0.846193	2.26901e-09	1	0	0.896999	2.90344e-08	1
NFKB2	ENSG00000077150	protein_coding	0	0	0.580195	0.0211083	1	0	0.301749	0.449251	0	0	0.707882	0.0502448	0
UBE2T	ENSG00000077152	protein_coding	0	0	-0.00650404	0.98688	0	0	0.604068	0.0442442	1	0	0.861742	0.00651275	1
PPP1R12B	ENSG00000077157	protein_coding	0	1	-0.626728	0.024343	0	1	-0.835466	0.0220174	0	1	-0.707919	0.0835041	0
DNAJC10	ENSG00000077232	protein_coding	0	0	-0.257561	0.104075	0	0	0.48047	0.0373965	1	0	0.782679	0.00172889	1
GTF3C1	ENSG00000077235	protein_coding	1	0	0.758417	7.07696e-15	1	0	0.771387	2.32073e-08	1	0	0.955882	8.08352e-10	1
IL4R	ENSG00000077238	protein_coding	0	0	0.571692	0.251938	0	0	0.291236	0.721945	0	0	0.465615	0.538923	0
USP33	ENSG00000077254	protein_coding	0	0	-0.177447	0.4204	0	0	1.00174	1.73225e-08	1	0	1.5343	4.51077e-14	1
PAK3	ENSG00000077264	protein_coding	0	0	-0.578018	0.460464	0	0	-0.0827244	0.962349	0	0	0.455316	0.762107	0
CAPN6	ENSG00000077274	protein_coding	0	0	0.619848	NA	0	0	-0.86025	NA	0	0	-0.159148	NA	0
DCX	ENSG00000077279	protein_coding	0	0	NA	NA	0	0	-2.24617	NA	0	0	NA	NA	0
SNRPA	ENSG00000077312	protein_coding	0	0	-0.266364	0.212329	0	0	-0.616388	0.00355814	0	1	-0.673692	0.00272744	0
SPAG6	ENSG00000077327	protein_coding	0	0	-0.0839728	NA	0	0	-1.68273	NA	0	0	-1.44901	NA	0
EXOSC5	ENSG00000077348	protein_coding	0	0	0.33093	0.516615	0	0	-0.0681674	0.93639	0	0	-0.500456	0.377459	0
DYNC1I2	ENSG00000077380	protein_coding	0	0	-0.0537228	0.846554	0	0	0.759907	0.00141167	1	0	1.37438	2.26051e-07	1
APBB1IP	ENSG00000077420	protein_coding	0	0	-0.380609	NA	0	0	0.588662	NA	0	0	0.421613	NA	0
LRCH4	ENSG00000077454	protein_coding	0	0	0.394729	0.664286	0	0	-0.572993	0.551721	0	0	-1.3945	0.0374534	0
FAM76B	ENSG00000077458	protein_coding	0	0	-0.26367	0.416463	0	0	0.802964	0.0372063	1	0	1.1319	0.00498921	1
SIRT6	ENSG00000077463	protein_coding	0	0	0.465605	0.324107	0	0	-0.344539	0.570659	0	0	-0.729202	0.123184	0
TYR	ENSG00000077498	protein_coding	0	0	NA	NA	0	0	NA	NA	0	0	NA	NA	0
POLD3	ENSG00000077514	protein_coding	0	0	-0.0735707	0.79859	0	0	0.45649	0.12752	0	0	0.491748	0.166673	0
ACTN2	ENSG00000077522	protein_coding	0	0	-0.303651	0.577474	0	0	-0.775834	0.16778	0	0	-0.60222	0.311365	0
CAPZB	ENSG00000077549	protein_coding	0	0	-0.327367	0.154159	0	0	-0.300944	0.346503	0	0	-0.487921	0.0897663	0
GPR137B	ENSG00000077585	protein_coding	0	0	-0.309855	0.581386	0	0	-0.0979146	0.923457	0	0	-1.66114	7.9409e-05	0
NAALAD2	ENSG00000077616	protein_coding	0	0	-1.19777	0.0407276	0	1	-0.455309	0.71944	0	0	-0.119919	0.936328	0
JADE1	ENSG00000077684	protein_coding	1	0	0.516627	0.0137285	1	0	0.915946	0.000551848	1	0	0.998425	0.000240247	1
SLC25A43	ENSG00000077713	protein_coding	0	0	0.119168	0.866375	0	0	0.246799	0.789726	0	0	-0.142309	0.86878	0
UBE2A	ENSG00000077721	protein_coding	0	0	-0.685885	8.9159e-05	0	1	-0.227193	0.515806	0	0	-0.261751	0.44644	0
FGFR1	ENSG00000077782	protein_coding	0	0	0.586689	0.00135934	1	0	0.438142	0.0968176	0	0	0.45931	0.0993157	0
FKBP6	ENSG00000077800	protein_coding	0	0	-0.380621	NA	0	0	0.588662	NA	0	0	0.421613	NA	0
SMC1B	ENSG00000077935	protein_coding	0	0	0.0806379	NA	0	0	-1.85643	NA	0	0	-1.35578	NA	0
FBLN1	ENSG00000077942	protein_coding	0	0	0.367655	0.117613	0	0	-0.105819	0.795688	0	0	-0.118702	0.759186	0
ITGA8	ENSG00000077943	protein_coding	0	0	0.10707	0.83671	0	0	0.924533	0.0598366	0	0	1.10318	0.030201	1
CST7	ENSG00000077984	protein_coding	0	0	0.621277	NA	0	0	-1.29106	NA	0	0	-2.23071	NA	0
MAP2	ENSG00000078018	protein_coding	0	0	-0.0155685	NA	0	0	0.276452	NA	0	0	-0.446577	NA	0
PIAS2	ENSG00000078043	protein_coding	0	0	-0.582192	0.0274596	0	1	-0.163594	0.749309	0	0	-0.132323	0.813346	0
AMPH	ENSG00000078053	protein_coding	0	0	0.215822	0.663324	0	0	0.311225	0.638943	0	0	0.576315	0.348225	0
ARAF	ENSG00000078061	protein_coding	0	0	0.28821	0.342694	0	0	-0.377123	0.252714	0	0	-0.265821	0.462617	0
MCCC1	ENSG00000078070	protein_coding	0	0	-0.113743	0.824663	0	0	0.112833	0.882214	0	0	0.073397	0.922357	0
LAMP3	ENSG00000078081	protein_coding	0	0	-0.839315	NA	0	0	1.31381	NA	0	0	0.987654	NA	0
FAP	ENSG00000078098	protein_coding	0	0	NA	NA	0	0	NA	NA	0	0	NA	NA	0
NEBL	ENSG00000078114	protein_coding	0	0	-0.341082	0.281001	0	0	0.606581	0.206301	0	0	1.63122	0.000828367	1
ACER3	ENSG00000078124	protein_coding	0	0	-0.489394	0.176298	0	0	-0.352384	0.522531	0	0	0.0238737	0.977844	0
UBE2K	ENSG00000078140	protein_coding	0	0	-0.418092	0.00935565	0	1	0.643805	0.00478916	1	0	0.798027	0.00125669	1
PIK3C3	ENSG00000078142	protein_coding	0	0	-0.540403	0.0457998	0	1	0.221673	0.702103	0	0	0.741935	0.132207	0
N4BP2	ENSG00000078177	protein_coding	0	0	-0.419931	0.0752028	0	0	0.622024	0.105373	0	0	1.03206	0.0062149	1
TIGAR	ENSG00000078237	protein_coding	0	0	-0.0127468	0.984548	0	0	0.757375	0.178294	0	0	0.836492	0.142682	0
TULP3	ENSG00000078246	protein_coding	0	0	0.18181	0.631003	0	0	0.389944	0.39539	0	0	0.54632	0.218945	0
SYNJ2	ENSG00000078269	protein_coding	0	0	0.716541	0.00277309	1	0	0.517597	0.1474	0	0	0.462154	0.223394	0
ADCY2	ENSG00000078295	protein_coding	0	0	-1.82281	NA	0	0	-2.43178	NA	0	0	NA	NA	0
PPP2R5C	ENSG00000078304	protein_coding	0	0	-0.41432	0.00241041	0	1	0.183143	0.500088	0	0	0.716251	0.00331185	1
PMS2P1	ENSG00000078319	unprocessed_pseudogene	0	0	-0.45064	0.648438	0	0	-0.70527	0.565487	0	0	0.316665	0.849887	0
RBFOX1	ENSG00000078328	protein_coding	0	0	NA	NA	0	0	NA	NA	0	0	NA	NA	0
GNB1	ENSG00000078369	protein_coding	0	0	-0.261379	0.0527855	0	0	-0.233771	0.215452	0	0	-0.294798	0.158502	0
HOXA9	ENSG00000078399	protein_coding	0	0	0.215128	0.557226	0	0	0.389857	0.410796	0	0	0.117255	0.829118	0
EDN1	ENSG00000078401	protein_coding	0	0	-1.82281	NA	0	0	-2.24617	NA	0	0	-2.64947	NA	0
MLLT10	ENSG00000078403	protein_coding	0	0	0.0143129	0.964472	0	0	0.289657	0.329506	0	0	0.373157	0.233472	0
ZCWPW1	ENSG00000078487	protein_coding	0	0	-0.0658183	NA	0	0	-0.586294	0.734232	0	0	0.472432	0.823596	0
ADCYAP1R1	ENSG00000078549	protein_coding	0	0	0.418261	0.308319	0	0	0.878471	0.0662836	0	0	0.315593	0.580121	0
FGF20	ENSG00000078579	protein_coding	0	0	1.3427	NA	0	0	0.0385342	NA	0	0	1.41952	NA	0
P2RY10	ENSG00000078589	protein_coding	0	0	NA	NA	0	0	NA	NA	0	0	-2.39584	NA	0
ITM2A	ENSG00000078596	protein_coding	0	0	NA	NA	0	0	NA	NA	0	0	NA	NA	0
NRDC	ENSG00000078618	protein_coding	0	0	0.256542	0.0611166	0	0	0.836747	2.43448e-07	1	0	1.14329	5.35293e-10	1
VDAC3	ENSG00000078668	protein_coding	0	0	-0.81599	1.84855e-10	0	1	0.135463	0.684614	0	0	0.534651	0.0455818	1
PCM1	ENSG00000078674	protein_coding	0	0	0.0741911	0.778036	0	0	0.595917	0.00200725	1	0	1.17357	1.2846e-08	1
TNRC6C	ENSG00000078687	protein_coding	0	0	0.486444	0.190738	0	0	-0.0884074	0.885241	0	0	-0.0462574	0.939214	0
CBFA2T2	ENSG00000078699	protein_coding	0	0	0.22067	0.553924	0	0	0.156722	0.759421	0	0	0.362948	0.427474	0
BRINP1	ENSG00000078725	protein_coding	0	0	NA	NA	0	0	NA	NA	0	0	NA	NA	0
ITCH.1	ENSG00000078747	protein_coding	0	0	-0.210793	0.454802	0	0	0.785874	0.02265	1	0	1.24021	0.000888651	1
PKD2L2	ENSG00000078795	protein_coding	0	0	-1.26122	NA	0	0	-2.15707	NA	0	0	0.381324	NA	0
TP53INP2	ENSG00000078804	protein_coding	0	0	-0.464804	0.435839	0	0	-1.05907	0.0900051	0	0	-1.20305	0.0452604	0
SDF4	ENSG00000078808	protein_coding	0	0	0.429885	0.0135721	1	0	0.39239	0.110677	0	0	0.375805	0.169147	0
MYH7B	ENSG00000078814	protein_coding	0	0	1.28504	0.268118	0	0	-0.661194	0.530014	0	0	-0.596608	0.571253	0
BPIFB2	ENSG00000078898	protein_coding	0	0	NA	NA	0	0	NA	NA	0	0	NA	NA	0
TP73	ENSG00000078900	protein_coding	0	0	-0.186398	0.753748	0	0	-0.295468	0.692795	0	0	0.0914823	0.923101	0
TOLLIP	ENSG00000078902	protein_coding	0	0	0.827786	0.00495221	1	0	0.269495	0.580902	0	0	-0.204251	0.676507	0
UBE2D4	ENSG00000078967	protein_coding	0	0	-0.324254	0.624813	0	0	0.179655	0.883027	0	0	-0.0526196	0.966661	0
CLUL1	ENSG00000079101	protein_coding	0	0	0.388547	NA	0	0	0.78706	NA	0	0	1.0255	NA	0
RUNX1T1	ENSG00000079102	protein_coding	0	0	0.304171	0.354521	0	0	-0.251808	0.559756	0	0	-0.144171	0.765985	0
CDH17	ENSG00000079112	protein_coding	0	0	1.92562	NA	0	0	0.774134	NA	0	0	2.00604	NA	0
THOC1	ENSG00000079134	protein_coding	0	0	-0.383765	0.209089	0	0	0.00884565	0.990089	0	0	0.26817	0.60892	0
FKBP7	ENSG00000079150	protein_coding	0	0	-0.234352	0.698761	0	0	0.330973	0.712641	0	0	-0.0295855	0.977614	0
OSBPL6	ENSG00000079156	protein_coding	0	0	0.0785832	0.849735	0	0	0.424277	0.325892	0	0	0.450178	0.276833	0
SLC1A3	ENSG00000079215	protein_coding	0	0	-0.388021	0.233955	0	0	0.109859	0.864863	0	0	0.512249	0.300223	0
XRCC5	ENSG00000079246	protein_coding	0	0	0.0696912	0.584614	0	0	0.919067	4.18821e-16	1	0	1.12814	4.94233e-17	1
LXN	ENSG00000079257	protein_coding	0	0	-0.670159	0.617918	0	0	-0.220264	NA	0	0	0.915263	NA	0
SP140	ENSG00000079263	protein_coding	0	0	-1.82281	NA	0	0	NA	NA	0	0	-2.64947	NA	0
MKNK1	ENSG00000079277	protein_coding	0	0	-0.2263	0.630974	0	0	-0.178615	0.802693	0	0	-0.508679	0.345884	0
TNS1	ENSG00000079308	protein_coding	0	0	0.776799	0.469165	0	0	0.0725275	0.970423	0	0	0.212513	0.89313	0
REXO1	ENSG00000079313	protein_coding	0	0	0.497174	0.0712883	0	0	-0.117811	0.799097	0	0	-0.110517	0.81566	0
SAR1A	ENSG00000079332	protein_coding	0	0	-0.350068	0.0580691	0	0	0.393484	0.0797078	0	0	0.381219	0.123271	0
CDC14A	ENSG00000079335	protein_coding	0	0	-0.0915349	0.898682	0	0	0.10631	0.913361	0	0	0.215259	0.800857	0
RAPGEF3	ENSG00000079337	protein_coding	0	0	0.0817764	NA	0	0	-0.380884	NA	0	0	-1.34086	0.338307	0
CEACAM1	ENSG00000079385	protein_coding	0	0	0.602503	NA	0	0	-0.886403	NA	0	0	-1.91059	0.0970928	0
SENP1	ENSG00000079387	protein_coding	0	0	0.0614456	0.864104	0	0	0.41803	0.235616	0	0	0.406565	0.287717	0
DUSP13	ENSG00000079393	protein_coding	0	0	NA	NA	0	0	NA	NA	0	0	-2.39584	NA	0
CIC	ENSG00000079432	protein_coding	0	0	0.430821	0.0435792	1	0	-0.343761	0.212533	0	0	-0.353337	0.216579	0
LIPE	ENSG00000079435	protein_coding	0	0	1.02487	0.255657	0	0	-0.717585	0.401697	0	0	-1.30293	0.0528276	0
FDFT1	ENSG00000079459	protein_coding	0	0	-0.0808767	0.740448	0	0	0.353518	0.177645	0	0	0.388774	0.156176	0
PAFAH1B3	ENSG00000079462	protein_coding	0	0	-0.359343	0.446767	0	0	-0.695058	0.200079	0	0	-0.354621	0.600384	0
OPHN1	ENSG00000079482	protein_coding	0	0	0.0620029	0.911213	0	0	0.372479	0.530014	0	0	1.00002	0.0707278	0
AFM	ENSG00000079557	protein_coding	0	0	NA	NA	0	0	NA	NA	0	0	NA	NA	0
KIF22	ENSG00000079616	protein_coding	0	0	0.154205	0.439539	0	0	0.0539949	0.87524	0	0	0.192635	0.499606	0
SCGN	ENSG00000079689	protein_coding	0	0	-2.45911	NA	0	0	NA	NA	0	0	NA	NA	0
CARMIL1	ENSG00000079691	protein_coding	0	0	-0.0932811	0.829144	0	0	0.482992	0.323418	0	0	0.298584	0.569433	0
PGM1	ENSG00000079739	protein_coding	0	0	-0.165457	0.501444	0	0	0.452325	0.0609914	0	0	0.432064	0.0983705	0
DDX1	ENSG00000079785	protein_coding	0	0	0.00334158	0.988614	0	0	0.522187	0.00858463	1	0	1.04701	3.75758e-08	1
DNM2	ENSG00000079805	protein_coding	0	0	0.124002	0.573196	0	0	-0.338139	0.0855457	0	0	-0.264348	0.248762	0
EPB41L2	ENSG00000079819	protein_coding	1	0	0.407342	0.00322641	1	0	0.412406	0.0278417	1	0	0.60506	0.00272149	1
RIMS1	ENSG00000079841	protein_coding	0	0	-0.0839132	NA	0	0	-0.653319	NA	0	0	-0.314949	NA	0
MOXD1	ENSG00000079931	protein_coding	0	0	-0.0771177	0.853131	0	0	0.67319	0.11945	0	0	0.120152	0.826273	0
STX7	ENSG00000079950	protein_coding	0	0	-0.204421	0.479577	0	0	0.541459	0.115024	0	0	0.89644	0.0072622	1
RABL2B	ENSG00000079974	protein_coding	0	0	-0.265848	0.577185	0	0	0.0117581	0.989738	0	0	-0.266475	0.700047	0
KEAP1	ENSG00000079999	protein_coding	0	0	0.463384	0.030076	1	0	0.0422827	0.924685	0	0	0.228913	0.579102	0
DDX43	ENSG00000080007	protein_coding	0	0	NA	NA	0	0	NA	NA	0	0	NA	NA	0
PTPRH	ENSG00000080031	protein_coding	0	0	1.54563	NA	0	0	2.35171	NA	0	0	0.139425	NA	0
DCT	ENSG00000080166	protein_coding	0	0	-3.00367	NA	0	0	-2.00936	NA	0	0	-2.68821	NA	0
SLC35C2	ENSG00000080189	protein_coding	0	0	-0.262747	0.401578	0	0	-0.647808	0.0379867	0	1	-1.14835	2.34985e-05	0
CRYBG3	ENSG00000080200	protein_coding	0	0	-0.567221	0.0115801	0	1	0.295919	0.487811	0	0	0.745941	0.0546078	0
EPHA6	ENSG00000080224	protein_coding	0	0	-0.614023	0.180197	0	0	-0.482559	0.520557	0	0	0.0150804	0.989441	0
SCTR	ENSG00000080293	protein_coding	0	0	0.51054	NA	0	0	-1.20427	NA	0	0	-1.73137	NA	0
RFX3	ENSG00000080298	protein_coding	0	0	-0.184233	0.731059	0	0	0.525685	0.490381	0	0	0.40504	0.587039	0
RIF1	ENSG00000080345	protein_coding	0	0	-0.474984	0.000520039	0	1	0.582656	7.95557e-05	1	0	0.90415	3.28387e-06	1
RAB21	ENSG00000080371	protein_coding	0	0	-0.133041	0.665885	0	0	0.508995	0.105827	0	0	0.5928	0.07302	0
SLC4A4	ENSG00000080493	protein_coding	0	0	0.0538445	0.950199	0	0	0.512445	0.586505	0	0	-0.264566	0.762775	0
SMARCA2	ENSG00000080503	protein_coding	0	0	0.502201	0.0219132	1	0	0.291306	0.389335	0	0	0.708378	0.0235328	1
RDH8	ENSG00000080511	protein_coding	0	0	NA	NA	0	0	NA	NA	0	0	NA	NA	0
SESN1	ENSG00000080546	protein_coding	0	0	-0.270544	0.378676	0	0	0.742758	0.0664923	0	0	0.954781	0.0302305	1
MID2	ENSG00000080561	protein_coding	0	0	-0.487717	0.0812354	0	0	0.481596	0.276966	0	0	0.456626	0.307077	0
PIH1D3	ENSG00000080572	protein_coding	0	0	NA	NA	0	0	-2.43178	NA	0	0	NA	NA	0
COL5A3	ENSG00000080573	protein_coding	0	0	NA	NA	0	0	NA	NA	0	0	NA	NA	0
SRCAP	ENSG00000080603	protein_coding	0	0	-0.373147	0.478312	0	0	-0.544247	0.42249	0	0	-0.958495	0.0786304	0
PUM3	ENSG00000080608	protein_coding	0	0	-0.156845	0.708475	0	0	0.286691	0.574979	0	0	0.761377	0.101401	0
CPB2	ENSG00000080618	protein_coding	0	0	-0.667311	NA	0	0	-2.90035	NA	0	0	-1.5531	NA	0
CHRNA3	ENSG00000080644	protein_coding	0	0	-0.145268	0.853243	0	0	0.438798	0.672067	0	0	0.0921462	0.936123	0
KCNN2	ENSG00000080709	protein_coding	0	0	0.577872	NA	0	0	-0.750552	NA	0	0	0.900791	NA	0
CNOT4	ENSG00000080802	protein_coding	0	0	-0.523091	0.0203859	0	1	-0.288238	0.450407	0	0	-0.164836	0.710922	0
PSEN1	ENSG00000080815	protein_coding	0	0	-0.150117	0.621	0	0	0.145824	0.732393	0	0	0.23187	0.556095	0
CPOX	ENSG00000080819	protein_coding	1	0	0.39531	0.0203859	1	0	1.28789	5.43666e-09	1	0	1.51748	9.66946e-10	1
CLDND1	ENSG00000080822	protein_coding	0	0	-0.868555	0.000248658	0	1	0.00219412	0.997955	0	0	-0.128344	0.817096	0
MOK	ENSG00000080823	protein_coding	0	0	-0.123669	0.866301	0	0	-1.15625	0.0212337	0	1	-0.404883	0.607134	0
HSP90AA1	ENSG00000080824	protein_coding	1	0	0.383351	2.14966e-05	1	0	1.0689	4.72356e-20	1	0	1.55114	1.95344e-37	1
RBL1	ENSG00000080839	protein_coding	0	0	-0.037025	0.92254	0	0	0.527359	0.145866	0	0	0.683276	0.0735886	0
DLGAP4	ENSG00000080845	protein_coding	0	0	0.114745	0.8126	0	0	-0.0461945	0.95087	0	0	-0.791631	0.0290331	0
IGSF9B	ENSG00000080854	protein_coding	0	0	-0.332143	0.633459	0	0	-0.384862	0.694982	0	0	-0.892974	0.217684	0
CFHR2	ENSG00000080910	protein_coding	0	0	NA	NA	0	0	NA	NA	0	0	NA	NA	0
CROCCP3	ENSG00000080947	transcribed_unprocessed_pseudogene	0	0	-0.680047	0.396163	0	0	-0.784687	0.474569	0	0	-1.20325	0.178867	0
NDC80	ENSG00000080986	protein_coding	0	0	-0.136543	0.656944	0	0	0.642616	0.071337	0	0	1.02781	0.00549369	1
AP4E1	ENSG00000081014	protein_coding	0	0	-0.186731	0.651659	0	0	0.522555	0.287229	0	0	1.03039	0.0424246	1
RSBN1	ENSG00000081019	protein_coding	0	0	-0.330532	0.184844	0	0	0.884674	0.00292948	1	0	0.621078	0.060999	0
MAGI3	ENSG00000081026	protein_coding	0	0	0.103834	0.714466	0	0	0.453904	0.113647	0	0	0.889508	0.00186516	1
CXCL2	ENSG00000081041	protein_coding	0	0	-0.41856	NA	0	0	-0.538419	NA	0	0	0.292486	NA	0
AFP	ENSG00000081051	protein_coding	0	0	NA	NA	0	0	NA	NA	0	0	NA	NA	0
COL4A4	ENSG00000081052	protein_coding	0	0	-0.550905	0.586845	0	0	-1.20902	0.248843	0	0	-0.765177	0.555399	0
TCF7	ENSG00000081059	protein_coding	0	0	-0.168424	0.733305	0	0	-0.708965	0.118336	0	0	-1.17678	0.00226231	0
OSTM1	ENSG00000081087	protein_coding	0	0	0.18906	0.673231	0	0	0.575894	0.281853	0	0	1.03141	0.0518203	0
CDH7	ENSG00000081138	protein_coding	0	0	-3.39118	NA	0	0	0.0406474	NA	0	0	1.42184	NA	0
IMPG2	ENSG00000081148	protein_coding	0	0	-2.26422	NA	0	0	-2.78418	NA	0	0	-2.47606	NA	0
PCNP	ENSG00000081154	protein_coding	0	0	-0.950536	5.61318e-13	0	1	0.100242	0.786751	0	0	0.869419	0.000713135	1
EXD2	ENSG00000081177	protein_coding	0	0	0.555958	0.0210166	1	0	0.746557	0.0179669	1	0	0.571982	0.0980963	0
ARG2	ENSG00000081181	protein_coding	0	0	-0.553675	0.239039	0	0	-0.334232	0.683991	0	0	0.0696913	0.946009	0
MEF2C	ENSG00000081189	protein_coding	0	0	0.0748187	0.899991	0	0	0.48009	0.425708	0	0	0.822933	0.152702	0
PTPRC	ENSG00000081237	protein_coding	0	0	NA	NA	0	0	NA	NA	0	0	NA	NA	0
CACNA1S	ENSG00000081248	protein_coding	0	0	1.3427	NA	0	0	-0.711112	NA	0	0	1.41952	NA	0
PKP1	ENSG00000081277	protein_coding	0	0	NA	NA	0	0	NA	NA	0	0	NA	NA	0
UBA5	ENSG00000081307	protein_coding	0	0	0.0748373	0.821709	0	0	0.611964	0.0565847	0	0	1.37791	2.60074e-05	1
STK17B	ENSG00000081320	protein_coding	0	0	-0.618902	0.00491269	0	1	0.652399	0.082363	0	0	1.32998	0.00067717	1
CDC14B	ENSG00000081377	protein_coding	0	0	0.0989702	0.751367	0	0	0.793514	0.00923889	1	0	0.68277	0.0372664	1
ZNF510	ENSG00000081386	protein_coding	0	0	-0.238816	0.69092	0	0	0.16181	0.868175	0	0	0.384605	0.66555	0
LRP2	ENSG00000081479	protein_coding	0	0	0.49073	0.0365378	1	0	0.415182	0.20709	0	0	0.562372	0.112488	0
ZNF506	ENSG00000081665	protein_coding	0	0	-1.4036	0.25663	0	0	-1.99693	0.179684	0	0	-1.9775	0.165206	0
JMJD4	ENSG00000081692	protein_coding	0	0	0.37631	0.457721	0	0	0.07873	0.93132	0	0	0.310987	0.668491	0
DUSP12	ENSG00000081721	protein_coding	0	0	0.241172	0.530091	0	0	0.18813	0.741563	0	0	0.608529	0.21654	0
AACS	ENSG00000081760	protein_coding	0	0	0.162323	0.676556	0	0	-0.159395	0.760112	0	0	-0.186116	0.705627	0
KIAA0141	ENSG00000081791	protein_coding	0	0	0.0308657	0.946204	0	0	-0.608767	0.0421201	0	1	-0.617587	0.0579164	0
SLC13A1	ENSG00000081800	protein_coding	0	0	NA	NA	0	0	NA	NA	0	0	NA	NA	0
CADPS2	ENSG00000081803	protein_coding	0	0	-0.978431	0.00172987	0	1	0.48313	0.522951	0	0	1.06331	0.146957	0
PCDHB4	ENSG00000081818	protein_coding	0	0	NA	NA	0	0	NA	NA	0	0	NA	NA	0
PCDHA6	ENSG00000081842	protein_coding	0	0	NA	NA	0	0	NA	NA	0	0	-3.24543	NA	0
PCDHGA2	ENSG00000081853	protein_coding	0	0	NA	NA	0	0	-3.45684	NA	0	0	NA	NA	0
HSPB11	ENSG00000081870	protein_coding	0	0	-0.628145	0.0941771	0	0	-0.213228	0.781182	0	0	0.6065	0.40795	0
PHLPP1	ENSG00000081913	protein_coding	0	0	0.655248	0.007773	1	0	0.339138	0.398546	0	0	0.456619	0.240653	0
ATP8B1	ENSG00000081923	protein_coding	0	0	-0.112383	0.929626	0	0	0.58076	0.708926	0	0	0.0817642	0.963524	0
IL12RB2	ENSG00000081985	protein_coding	0	0	-0.00129925	0.999048	0	0	-1.36456	0.018617	0	1	-1.20967	0.0609274	0
SMARCD3	ENSG00000082014	protein_coding	0	0	-0.164584	0.669006	0	0	-0.20893	0.703509	0	0	-0.3375	0.467439	0
WDR70	ENSG00000082068	protein_coding	0	0	0.184616	0.567233	0	0	0.525257	0.151273	0	0	1.02068	0.00400644	1
FYB	ENSG00000082074	protein_coding	0	0	0.340692	NA	0	0	0.588662	NA	0	0	0.421613	NA	0
MPP4	ENSG00000082126	protein_coding	0	0	1.65969	NA	0	0	0.463616	NA	0	0	3.7431	NA	0
STRADB	ENSG00000082146	protein_coding	0	0	-0.408309	0.117663	0	0	-0.147219	0.765673	0	0	0.200697	0.704805	0
BZW1	ENSG00000082153	protein_coding	0	0	-0.346709	0.00597092	0	1	0.693786	2.153e-05	1	0	1.24036	1.71653e-11	1
PGR	ENSG00000082175	protein_coding	0	0	-0.670241	NA	0	0	0.0485261	NA	0	0	0.0409257	NA	0
C1QTNF3	ENSG00000082196	protein_coding	0	0	-2.44278	NA	0	0	-1.8613	NA	0	0	-0.159148	NA	0
ME2	ENSG00000082212	protein_coding	0	0	-0.113402	0.670186	0	0	0.506297	0.0923994	0	0	0.949574	0.00187694	1
C5orf22	ENSG00000082213	protein_coding	0	0	-0.173862	0.563102	0	0	0.56433	0.115449	0	0	0.615265	0.118987	0
CCNT2	ENSG00000082258	protein_coding	0	0	-0.00700145	0.984075	0	0	0.700962	0.00545627	1	0	0.927877	0.000643396	1
FAM135A	ENSG00000082269	protein_coding	0	0	-0.0938921	0.777036	0	0	0.711306	0.0256899	1	0	1.26807	0.000270401	1
COL19A1	ENSG00000082293	protein_coding	0	0	-0.615037	NA	0	0	-0.832961	NA	0	0	-0.542556	0.790606	0
EPB41L3	ENSG00000082397	protein_coding	0	0	-0.123385	0.66626	0	0	-0.152818	0.680843	0	0	0.09366	0.821156	0
COBLL1	ENSG00000082438	protein_coding	0	0	-0.47699	0.182644	0	0	-0.186588	0.784444	0	0	-0.0229002	0.977844	0
DLG3	ENSG00000082458	protein_coding	0	0	0.455971	0.0641528	0	0	0.598458	0.0720996	0	0	0.6489	0.0632555	0
KCNK2	ENSG00000082482	protein_coding	0	0	-0.128581	NA	0	0	0.462744	NA	0	0	-0.234053	NA	0
SERTAD4	ENSG00000082497	protein_coding	0	0	-0.467523	NA	0	0	-0.128467	NA	0	0	-0.241325	NA	0
TRAF5	ENSG00000082512	protein_coding	0	0	-0.00174934	0.997882	0	0	0.355052	0.532983	0	0	0.603907	0.25649	0
MRPL22	ENSG00000082515	protein_coding	0	0	-0.318668	0.340375	0	0	-0.0582331	0.933876	0	0	0.592908	0.254983	0
GEMIN5	ENSG00000082516	protein_coding	1	0	0.706993	1.36254e-06	1	0	1.02746	4.19162e-07	1	0	1.54434	5.98437e-12	1
OPRK1	ENSG00000082556	protein_coding	0	0	NA	NA	0	0	NA	NA	0	0	NA	NA	0
NFE2L1	ENSG00000082641	protein_coding	0	0	0.716048	8.90617e-08	1	0	0.605053	0.000994769	1	0	0.398851	0.0677505	0
SEMA5B	ENSG00000082684	protein_coding	0	0	1.82906	NA	0	0	-0.656147	NA	0	0	-0.643278	0.718659	0
GSK3B	ENSG00000082701	protein_coding	0	0	0.28095	0.233987	0	0	0.465044	0.0780157	0	0	0.528791	0.0600159	0
ITGB5	ENSG00000082781	protein_coding	0	0	0.55593	0.0836629	0	0	-0.247173	0.607324	0	0	-0.0134571	0.983467	0
ERC1	ENSG00000082805	protein_coding	0	0	0.3094	0.298327	0	0	0.137686	0.766458	0	0	0.193535	0.648562	0
XPO1	ENSG00000082898	protein_coding	0	0	-0.733577	5.79694e-16	0	1	0.865301	2.71422e-10	1	0	0.849137	3.70844e-07	1
LINC01587	ENSG00000082929	processed_transcript	0	0	NA	NA	0	0	NA	NA	0	0	-2.64947	NA	0
RNF13	ENSG00000082996	protein_coding	0	0	-0.168446	0.65881	0	0	0.254476	0.62637	0	0	0.839415	0.0886428	0
TRPM3	ENSG00000083067	protein_coding	0	0	0.925964	NA	0	0	-2.2717	NA	0	0	-2.18441	NA	0
PALB2	ENSG00000083093	protein_coding	0	0	0.0385308	0.925183	0	0	0.623498	0.108912	0	0	0.60187	0.144318	0
DOPEY1	ENSG00000083097	protein_coding	0	0	0.177003	0.542503	0	0	0.53946	0.0991384	0	0	1.36036	0.000110872	1
LYRM2	ENSG00000083099	protein_coding	0	0	-0.0561693	0.868186	0	0	0.938184	0.00210161	1	0	1.34314	6.58112e-05	1
BCKDHB	ENSG00000083123	protein_coding	0	0	-0.080889	0.873301	0	0	0.575664	0.264372	0	0	0.924052	0.0591263	0
KAT6A	ENSG00000083168	protein_coding	0	0	0.310402	0.0982296	0	0	0.495314	0.0385949	1	0	0.660855	0.00939371	1
ZCCHC6	ENSG00000083223	protein_coding	0	0	-0.255405	0.358522	0	0	0.190267	0.673617	0	0	0.278053	0.521355	0
ULK2	ENSG00000083290	protein_coding	0	0	0.144723	0.714019	0	0	0.0971251	0.875229	0	0	0.0336097	0.957039	0
GRHL2	ENSG00000083307	protein_coding	0	0	1.20626	NA	0	0	2.17156	NA	0	0	0.624642	NA	0
TNPO1	ENSG00000083312	protein_coding	0	0	0.0956298	0.549401	0	0	1.14839	3.2893e-17	1	0	1.70235	7.29262e-19	1
PLOD1	ENSG00000083444	protein_coding	0	0	0.295749	0.305892	0	0	-0.182523	0.661421	0	0	-0.0222923	0.966837	0
P2RX5	ENSG00000083454	protein_coding	0	0	1.92562	NA	0	0	-0.904951	NA	0	0	-1.9671	NA	0
ITGAE	ENSG00000083457	protein_coding	0	0	-0.742762	0.0891702	0	0	-0.540721	0.426551	0	0	-0.369025	0.620423	0
DIS3	ENSG00000083520	protein_coding	1	0	0.336709	0.00449065	1	0	1.25257	1.12048e-18	1	0	1.60826	9.11399e-26	1
PIBF1	ENSG00000083535	protein_coding	0	0	-0.876982	6.45736e-06	0	1	0.198654	0.637815	0	0	0.382542	0.311068	0
TDRD3	ENSG00000083544	protein_coding	0	0	-0.190536	0.628696	0	0	0.187249	0.761047	0	0	0.677062	0.190199	0
AC000111.6	ENSG00000083622	antisense	0	0	NA	NA	0	0	NA	NA	0	0	NA	NA	0
NUFIP1	ENSG00000083635	protein_coding	0	0	-0.13824	0.75866	0	0	-0.0232696	0.976832	0	0	0.89775	0.106806	0
PDS5B	ENSG00000083642	protein_coding	0	0	-0.111421	0.634682	0	0	0.915505	1.27293e-05	1	0	1.57077	1.32769e-11	1
OXCT1	ENSG00000083720	protein_coding	1	0	0.593727	0.0154799	1	0	1.08364	0.000149337	1	0	1.64344	2.41136e-07	1
RRAGB	ENSG00000083750	protein_coding	0	0	-0.279671	0.622961	0	0	0.262803	0.74348	0	0	0.627719	0.379002	0
EPYC	ENSG00000083782	protein_coding	0	0	NA	NA	0	0	NA	NA	0	0	NA	NA	0
CYLD	ENSG00000083799	protein_coding	0	0	0.103043	0.767667	0	0	0.634418	0.082363	0	0	1.37929	0.0002862	1
SLC27A5	ENSG00000083807	protein_coding	0	0	-0.332055	0.723728	0	0	-1.02065	0.278476	0	0	-1.15334	0.188213	0
ZNF324	ENSG00000083812	protein_coding	0	0	0.747901	0.0293294	1	0	0.0866647	0.891149	0	0	0.333507	0.519936	0
ZNF671	ENSG00000083814	protein_coding	0	0	-1.13538	NA	0	0	-1.90915	NA	0	0	-2.7317	NA	0
ZNF416	ENSG00000083817	protein_coding	0	0	-0.0619893	0.954527	0	0	0.252253	0.865365	0	0	0.714149	0.569318	0
ZNF586	ENSG00000083828	protein_coding	0	0	-0.420962	0.618129	0	0	-0.271654	0.842266	0	0	-0.176313	0.895794	0
ZNF446	ENSG00000083838	protein_coding	0	0	0.383272	0.665039	0	0	-0.217402	0.857607	0	0	-0.106687	0.933799	0
ZNF264	ENSG00000083844	protein_coding	0	0	-0.123954	0.795769	0	0	0.192254	0.738042	0	0	-0.199011	0.704336	0
RPS5	ENSG00000083845	protein_coding	0	0	-0.0721281	0.722307	0	0	-0.943018	1.37003e-12	0	1	-0.449261	0.0133058	0
FAT1	ENSG00000083857	protein_coding	0	0	0.27832	0.0927187	0	0	0.550039	0.00207727	1	0	1.00855	1.68176e-07	1
YTHDC1	ENSG00000083896	protein_coding	0	0	0.87225	0.069764	0	0	1.68342	0.0112562	1	0	0.858714	0.197211	0
CHMP2B	ENSG00000083937	protein_coding	0	0	-0.571172	0.00239921	0	1	0.512143	0.159001	0	0	0.608763	0.0829744	0
SMAP2	ENSG00000084070	protein_coding	0	0	0.49826	0.0521404	0	0	0.209635	0.61321	0	0	0.112182	0.813381	0
PPIE	ENSG00000084072	protein_coding	0	0	0.216641	0.465821	0	0	0.0326781	0.954746	0	0	0.36714	0.354868	0
ZMPSTE24	ENSG00000084073	protein_coding	0	0	0.00677962	0.983732	0	0	0.871826	0.000217956	1	0	0.206333	0.498181	0
STARD7	ENSG00000084090	protein_coding	1	0	0.329481	0.00106822	1	0	1.07165	1.51687e-16	1	0	0.888734	9.66057e-10	1
NOA1	ENSG00000084092	protein_coding	0	0	-0.144866	0.548225	0	0	0.112424	0.777217	0	0	0.181315	0.613419	0
REST	ENSG00000084093	protein_coding	0	0	-0.036762	0.899778	0	0	0.785772	0.000759272	1	0	1.38232	2.58663e-07	1
HAL	ENSG00000084110	protein_coding	0	0	-1.38685	NA	0	0	-2.07318	NA	0	0	-1.42599	NA	0
SSH1	ENSG00000084112	protein_coding	0	0	0.0491801	0.892023	0	0	0.0385081	0.942616	0	0	-0.0998652	0.821202	0
GSTP1	ENSG00000084207	protein_coding	0	1	-0.502665	0.000163679	0	1	-0.526553	0.00112097	0	1	-0.234402	0.290959	0
APLP2	ENSG00000084234	protein_coding	1	0	1.02307	4.92881e-31	1	0	1.21615	2.27064e-24	1	0	1.21762	7.69795e-20	1
FAM234B	ENSG00000084444	protein_coding	0	0	0.30327	0.296712	0	0	0.443462	0.23868	0	0	0.366387	0.35587	0
SLCO1A2	ENSG00000084453	protein_coding	0	0	-2.56672	NA	0	0	NA	NA	0	0	NA	NA	0
WBP11	ENSG00000084463	protein_coding	0	0	0.262873	0.182186	0	0	0.279606	0.260848	0	0	0.450591	0.0677112	0
EIF3I	ENSG00000084623	protein_coding	0	0	-0.324615	0.00649482	0	1	0.287795	0.0818885	0	0	0.285463	0.12696	0
NKAIN1	ENSG00000084628	protein_coding	0	0	-0.0220892	0.985877	0	0	-0.581721	0.602203	0	0	-1.10397	0.182196	0
COL16A1	ENSG00000084636	protein_coding	0	0	1.50735	NA	0	0	-0.62384	NA	0	0	-1.64075	NA	0
TXLNA	ENSG00000084652	protein_coding	1	0	1.11815	4.45959e-24	1	0	0.659943	2.10097e-06	1	0	0.564869	0.000564371	1
APOB	ENSG00000084674	protein_coding	0	0	NA	NA	0	0	NA	NA	0	0	NA	NA	0
NCOA1	ENSG00000084676	protein_coding	0	0	0.104019	0.787764	0	0	0.222313	0.6272	0	0	0.570008	0.161246	0
AGBL5	ENSG00000084693	protein_coding	0	0	-0.368345	0.0746852	0	0	-0.407452	0.129646	0	0	-0.524825	0.0524043	0
EFR3B	ENSG00000084710	protein_coding	0	0	0.381958	0.458259	0	0	0.356715	0.598147	0	0	0.48707	0.451197	0
KIF3C	ENSG00000084731	protein_coding	0	0	0.33705	0.369599	0	0	0.380257	0.440737	0	0	-0.0313987	0.960896	0
RAB10	ENSG00000084733	protein_coding	0	0	-0.285172	0.0684222	0	0	0.436349	0.0351728	1	0	-0.142837	0.610412	0
GCKR	ENSG00000084734	protein_coding	0	0	-2.62419	NA	0	0	-2.24617	NA	0	0	-2.39584	NA	0
HADHA	ENSG00000084754	protein_coding	0	0	-0.115659	0.455787	0	0	0.675389	1.00378e-05	1	0	0.988997	6.55227e-08	1
MAPRE3	ENSG00000084764	protein_coding	0	0	0.216638	0.734863	0	0	-0.445092	0.513518	0	0	-0.707841	0.227115	0
CAD	ENSG00000084774	protein_coding	0	0	0.169874	0.42165	0	0	-0.196055	0.446041	0	0	-0.0764924	0.808076	0
CD59	ENSG00000085063	protein_coding	0	0	-0.259154	0.361823	0	0	0.245364	0.603048	0	0	0.195945	0.689131	0
CD82	ENSG00000085117	protein_coding	0	0	0.0915539	NA	0	0	0.367658	NA	0	0	-0.46189	0.786721	0
BCORL1	ENSG00000085185	protein_coding	0	0	0.166053	0.573196	0	0	0.0779504	0.86563	0	0	-0.457981	0.105861	0
ATRX	ENSG00000085224	protein_coding	0	0	-0.344128	0.0759782	0	0	0.277371	0.26899	0	0	0.651146	0.00579148	1
AK6	ENSG00000085231	protein_coding	0	0	NA	NA	0	0	NA	NA	0	0	NA	NA	0
FCN1	ENSG00000085265	protein_coding	0	0	NA	NA	0	0	NA	NA	0	0	NA	NA	0
MYNN	ENSG00000085274	protein_coding	0	0	-0.0574611	0.909381	0	0	0.453244	0.411589	0	0	0.609408	0.251735	0
MECOM	ENSG00000085276	protein_coding	0	0	0.202833	0.459286	0	0	0.888367	0.00272035	1	0	0.945631	0.00271177	1
SCAMP1	ENSG00000085365	protein_coding	0	0	-0.233281	0.246666	0	0	0.78882	0.00152793	1	0	1.18676	1.30925e-05	1
PREP	ENSG00000085377	protein_coding	0	0	0.309663	0.152887	0	0	0.528582	0.0520968	0	0	0.897616	0.00215967	1
HACE1	ENSG00000085382	protein_coding	0	0	-0.173116	0.607396	0	0	0.611515	0.123976	0	0	0.696904	0.0896327	0
SEH1L	ENSG00000085415	protein_coding	0	0	-0.287383	0.209615	0	0	0.595317	0.0370593	1	0	0.302767	0.364341	0
WDR47	ENSG00000085433	protein_coding	0	0	0.0346646	0.938634	0	0	0.692736	0.0863162	0	0	0.85839	0.0335519	1
WDFY1	ENSG00000085449	protein_coding	0	0	0.138366	0.657897	0	0	0.696391	0.0289414	1	0	0.83554	0.0121232	1
OVGP1	ENSG00000085465	protein_coding	0	0	-0.709565	0.304401	0	0	-0.559413	0.617038	0	0	-1.80343	0.00438864	0
SLC25A24	ENSG00000085491	protein_coding	1	0	0.529462	0.00412593	1	0	1.72035	1.42475e-11	1	0	2.14623	4.70605e-15	1
MAP3K4	ENSG00000085511	protein_coding	0	0	0.286229	0.226514	0	0	0.652916	0.0128498	1	0	0.774366	0.00557769	1
PILRA	ENSG00000085514	protein_coding	0	0	1.15308	NA	0	0	-0.490167	NA	0	0	-1.28996	0.453761	0
IGSF9	ENSG00000085552	protein_coding	0	0	0.305667	NA	0	0	0.77801	NA	0	0	-0.568699	0.740574	0
ABCB1	ENSG00000085563	protein_coding	0	0	0.706605	0.227723	0	0	0.871524	0.241694	0	0	0.91195	0.242222	0
ZNF213	ENSG00000085644	protein_coding	0	0	0.18796	0.694753	0	0	-0.519192	0.255625	0	0	-0.674801	0.115361	0
AKR1B1	ENSG00000085662	protein_coding	0	0	0.193605	0.221933	0	0	0.127302	0.609119	0	0	0.108419	0.702469	0
CPNE3	ENSG00000085719	protein_coding	0	0	-0.184144	0.260397	0	0	0.886643	3.20555e-07	1	0	1.11102	8.31317e-08	1
RRN3	ENSG00000085721	protein_coding	0	0	1.42712	0.0412126	1	0	1.33044	0.0391995	1	0	1.2042	0.0688541	0
CTTN	ENSG00000085733	protein_coding	0	0	0.34124	0.0333244	1	0	0.379069	0.0436044	1	0	0.264788	0.225247	0
WNT11	ENSG00000085741	protein_coding	0	0	0.866005	0.165425	0	0	0.407208	0.66976	0	0	0.383298	0.684299	0
MTIF2	ENSG00000085760	protein_coding	0	0	0.0886606	0.722206	0	0	0.686715	0.00656638	1	0	1.21263	2.25667e-06	1
DDHD2	ENSG00000085788	protein_coding	0	0	0.164041	0.505676	0	0	1.20165	8.32626e-07	1	0	1.36015	1.18819e-07	1
TTC39A	ENSG00000085831	protein_coding	0	0	0.236208	0.720189	0	0	-0.252796	0.75232	0	0	0.164366	0.850974	0
EPS15	ENSG00000085832	protein_coding	0	0	-0.230242	0.319278	0	0	0.657654	0.00397163	1	0	0.794661	0.001299	1
ORC1	ENSG00000085840	protein_coding	0	0	0.363121	0.0747858	0	0	0.716031	0.00145785	1	0	0.969827	9.7242e-05	1
MGST2	ENSG00000085871	protein_coding	0	0	-0.581517	0.416112	0	0	-0.792056	0.377103	0	0	-0.785386	0.365753	0
CHERP	ENSG00000085872	protein_coding	0	0	0.574903	0.00235403	1	0	0.284457	0.321971	0	0	0.2331	0.450212	0
ATG16L1	ENSG00000085978	protein_coding	0	0	NA	NA	0	0	NA	NA	0	0	NA	NA	0
USP40	ENSG00000085982	protein_coding	0	0	0.528849	0.0544035	0	0	0.572195	0.0877948	0	0	0.708846	0.0451709	1
POMGNT1	ENSG00000085998	protein_coding	0	0	0.291821	0.271718	0	0	0.451054	0.199644	0	0	0.623035	0.0687002	0
RAD54L	ENSG00000085999	protein_coding	0	0	-0.00762672	0.987153	0	0	-0.08828	0.872741	0	0	-0.376033	0.339262	0
MAST2	ENSG00000086015	protein_coding	0	0	0.509273	0.0232247	1	0	-0.1423	0.706518	0	0	0.233852	0.564177	0
DNAJA1	ENSG00000086061	protein_coding	0	0	0.000921418	0.99736	0	0	0.805706	2.7085e-07	1	0	1.19454	1.13116e-11	1
B4GALT1	ENSG00000086062	protein_coding	0	0	0.526365	0.0163479	1	0	0.607769	0.0440512	1	0	0.365563	0.295213	0
CHMP5	ENSG00000086065	protein_coding	0	0	-0.237604	0.27817	0	0	0.777632	0.00551888	1	0	1.05506	0.000541673	1
NFX1	ENSG00000086102	protein_coding	0	0	0.348175	0.0743856	0	0	0.283862	0.323514	0	0	0.609057	0.0261395	1
AQP6	ENSG00000086159	protein_coding	0	0	0.467627	NA	0	0	-0.905068	NA	0	0	-1.74103	0.310194	0
DIMT1	ENSG00000086189	protein_coding	0	0	-0.662632	0.00025791	0	1	0.197495	0.625912	0	0	0.66204	0.0679673	0
IPO11	ENSG00000086200	protein_coding	0	0	-0.318412	0.135489	0	0	0.829431	0.00196142	1	0	1.53949	8.57521e-08	1
FOLH1	ENSG00000086205	protein_coding	0	0	0.342988	NA	0	0	0.949897	NA	0	0	0.0176468	NA	0
EIF2AK1	ENSG00000086232	protein_coding	0	0	-0.0152475	0.955065	0	0	0.433412	0.0209946	1	0	0.588373	0.00671861	1
NME8	ENSG00000086288	protein_coding	0	0	NA	NA	0	0	NA	NA	0	0	NA	NA	0
EPDR1	ENSG00000086289	protein_coding	0	0	0.934935	0.0402331	1	0	0.983258	0.10239	0	0	1.35009	0.0301385	1
SNX10	ENSG00000086300	protein_coding	0	0	-0.00767659	0.991748	0	0	0.719506	0.291512	0	0	1.4353	0.0356611	1
SEPHS1	ENSG00000086475	protein_coding	1	0	0.753572	1.26088e-08	1	0	1.03679	4.68526e-09	1	0	1.29837	6.26529e-11	1
MRPL28	ENSG00000086504	protein_coding	0	0	0.186549	0.454322	0	0	-0.0117663	0.980433	0	0	0.0841239	0.831925	0
HBQ1	ENSG00000086506	protein_coding	0	0	-0.729239	0.40984	0	0	-1.12868	0.2685	0	0	-0.94051	0.394836	0
ITPKC	ENSG00000086544	protein_coding	0	0	0.691655	0.138564	0	0	0.640088	0.339004	0	0	0.674666	0.317111	0
CEACAM6	ENSG00000086548	protein_coding	0	0	NA	NA	0	0	NA	NA	0	0	NA	NA	0
FAT2	ENSG00000086570	protein_coding	0	0	-0.191737	0.90235	0	0	-0.936945	0.496286	0	0	-0.424352	0.803901	0
RBM22	ENSG00000086589	protein_coding	0	0	0.466351	0.0340149	1	0	-0.0942068	0.821161	0	0	0.0502832	0.908048	0
TMED2	ENSG00000086598	protein_coding	0	0	-0.580221	5.45188e-06	0	1	0.641879	0.000465892	1	0	0.964212	9.00228e-06	1
ERO1B	ENSG00000086619	protein_coding	0	0	-0.141952	0.690059	0	0	0.488281	0.280806	0	0	0.785567	0.0664215	0
ZFAND6	ENSG00000086666	protein_coding	0	0	-0.510123	0.0136529	0	1	0.400007	0.373036	0	0	0.452475	0.252539	0
HSD17B2	ENSG00000086696	protein_coding	0	0	1.92665	NA	0	0	-0.814964	NA	0	0	2.00526	NA	0
TXLNG	ENSG00000086712	protein_coding	0	0	-0.11984	0.579922	0	0	0.58017	0.00930108	1	0	0.907994	8.7991e-05	1
PPEF1	ENSG00000086717	protein_coding	0	0	-0.760555	NA	0	0	0.463382	NA	0	0	-0.506961	NA	0
LAT2	ENSG00000086730	protein_coding	0	0	1.22152	NA	0	0	-0.979754	0.37508	0	0	-1.06301	0.331414	0
HUWE1	ENSG00000086758	protein_coding	1	0	0.411043	0.000683849	1	0	0.396273	0.000327128	1	0	0.59273	7.08827e-06	1
ZW10	ENSG00000086827	protein_coding	0	0	-0.267391	0.254295	0	0	0.239002	0.538411	0	0	0.899566	0.00738264	1
ALG9	ENSG00000086848	protein_coding	0	0	-0.167358	0.821503	0	0	0.309362	0.751207	0	0	0.757614	0.393478	0
MYBPC2	ENSG00000086967	protein_coding	0	0	-1.62392	NA	0	0	0.588662	NA	0	0	-3.03522	NA	0
NOX4	ENSG00000086991	protein_coding	0	0	-1.82281	NA	0	0	NA	NA	0	0	NA	NA	0
ACOX3	ENSG00000087008	protein_coding	0	0	-0.299016	0.548225	0	0	-0.218065	0.779157	0	0	-0.553899	0.344552	0
MTMR2	ENSG00000087053	protein_coding	0	0	-0.492854	0.00182674	0	1	0.370739	0.197706	0	0	0.570298	0.0431677	1
PPP1R15A	ENSG00000087074	protein_coding	0	0	0.0628833	0.845182	0	0	0.147459	0.69183	0	0	0.0977248	0.810379	0
HSD17B14	ENSG00000087076	protein_coding	0	0	0.0168589	0.991967	0	0	-0.684865	0.669668	0	0	-0.420602	0.809467	0
TRIP6	ENSG00000087077	protein_coding	0	0	-0.0410546	0.903442	0	0	-0.0535028	0.901584	0	0	-0.285172	0.429806	0
ACHE	ENSG00000087085	protein_coding	0	0	-1.37276	0.16024	0	0	-1.0074	NA	0	0	-2.17097	0.0474915	0
FTL	ENSG00000087086	protein_coding	0	1	-0.760192	1.06894e-05	0	1	-1.29835	2.38957e-14	0	1	-1.37693	1.12185e-13	0
SRRT	ENSG00000087087	protein_coding	0	0	0.293152	0.0620354	0	0	-0.203128	0.333233	0	0	0.0128751	0.968993	0
BAX	ENSG00000087088	protein_coding	0	0	0.0673041	0.848864	0	0	-0.397942	0.188771	0	0	-0.749148	0.00489226	0
NLK	ENSG00000087095	protein_coding	0	0	-0.0721329	0.888461	0	0	0.0969542	0.881258	0	0	-0.353423	0.468385	0
PIGS	ENSG00000087111	protein_coding	0	0	0.437663	0.00369477	1	0	0.215542	0.362012	0	0	-0.429594	0.0311174	0
ADAMTS2	ENSG00000087116	protein_coding	0	0	0.197762	0.726899	0	0	-0.162604	0.836759	0	0	-0.347039	0.614106	0
TMPRSS11E	ENSG00000087128	protein_coding	0	0	NA	NA	0	0	NA	NA	0	0	NA	NA	0
ATXN7L3	ENSG00000087152	protein_coding	0	0	0.575197	0.000306029	1	0	0.50187	0.0209399	1	0	0.400091	0.103748	0
PGS1	ENSG00000087157	protein_coding	0	0	0.1212	0.778743	0	0	-0.664682	0.0533135	0	0	-1.22654	4.73994e-05	0
PSMC5	ENSG00000087191	protein_coding	0	0	0.229781	0.348597	0	0	0.0917752	0.815063	0	0	0.185249	0.610825	0
UIMC1	ENSG00000087206	protein_coding	0	0	0.159457	0.58271	0	0	0.594617	0.0431752	1	0	0.509102	0.109099	0
CETP	ENSG00000087237	protein_coding	0	0	NA	NA	0	0	NA	NA	0	0	NA	NA	0
MMP2	ENSG00000087245	protein_coding	0	0	-0.0591861	0.962351	0	0	0.288803	0.854692	0	0	0.302924	0.829394	0
MT3	ENSG00000087250	protein_coding	0	0	NA	NA	0	0	NA	NA	0	0	NA	NA	0
LPCAT2	ENSG00000087253	protein_coding	0	0	-0.199425	0.632171	0	0	0.593606	0.282249	0	0	0.755677	0.160654	0
GNAO1	ENSG00000087258	protein_coding	0	0	-0.167092	0.822909	0	0	0.153489	0.89015	0	0	-0.247422	0.781037	0
OGFOD1	ENSG00000087263	protein_coding	0	0	0.139368	0.6495	0	0	0.439654	0.20264	0	0	0.506848	0.148472	0
SH3BP2	ENSG00000087266	protein_coding	0	0	0.63887	0.014673	1	0	-0.119922	0.789067	0	0	-0.339854	0.334013	0
NOP14	ENSG00000087269	protein_coding	0	0	0.0457665	0.858798	0	0	0.185323	0.505912	0	0	0.283231	0.316005	0
ADD1	ENSG00000087274	protein_coding	0	0	0.376213	0.00612907	1	0	0.528749	0.00325169	1	0	0.348501	0.0917392	0
L2HGDH	ENSG00000087299	protein_coding	0	0	0.209611	0.515198	0	0	1.01905	0.00385035	1	0	1.00685	0.00656427	1
TXNDC16	ENSG00000087301	protein_coding	0	0	-0.453759	0.0873074	0	0	0.384024	0.444518	0	0	0.983461	0.0318738	1
C14orf166	ENSG00000087302	protein_coding	0	0	-0.410036	0.0415676	0	1	-0.107488	0.772746	0	0	0.418535	0.165064	0
NID2	ENSG00000087303	protein_coding	0	0	0.470451	0.105297	0	0	-0.0952031	0.850944	0	0	-0.0679947	0.895577	0
GMCL1	ENSG00000087338	protein_coding	0	0	-0.13003	0.703029	0	0	0.714936	0.0312613	1	0	0.941615	0.00759931	1
SF3B2	ENSG00000087365	protein_coding	1	0	0.855075	6.35518e-18	1	0	0.738933	3.88884e-09	1	0	1.13095	1.25134e-14	1
KLHL42	ENSG00000087448	protein_coding	0	0	-0.51841	0.0487049	0	1	0.00231111	0.99783	0	0	0.141911	0.798384	0
GNAS	ENSG00000087460	protein_coding	0	0	-0.0974265	0.580849	0	0	-0.315025	0.0102617	0	1	-0.0652645	0.771688	0
DNM1L	ENSG00000087470	protein_coding	0	0	-0.396872	0.010085	0	1	0.347653	0.177113	0	0	0.727296	0.00402398	1
PTHLH	ENSG00000087494	protein_coding	0	0	1.92665	NA	0	0	2.17235	NA	0	0	2.00526	NA	0
PHACTR3	ENSG00000087495	protein_coding	0	0	0.910279	0.299537	0	0	0.428144	0.743337	0	0	1.89299	0.128954	0
ERGIC2	ENSG00000087502	protein_coding	0	0	-0.417785	0.0960593	0	0	0.46794	0.277314	0	0	0.939068	0.0343691	1
TFAP2C	ENSG00000087510	protein_coding	0	0	0.308643	0.625596	0	0	0.0676618	0.952188	0	0	0.666302	0.43569	0
AURKA	ENSG00000087586	protein_coding	0	0	-0.195167	0.413941	0	0	0.357033	0.232184	0	0	0.272175	0.403295	0
CASS4	ENSG00000087589	protein_coding	0	0	1.92562	NA	0	0	-1.34464	NA	0	0	-1.80959	NA	0
PIR	ENSG00000087842	protein_coding	0	0	-0.255334	0.679221	0	0	0.431278	0.631497	0	0	0.511418	0.563034	0
AAMDC	ENSG00000087884	protein_coding	0	0	-0.711869	0.554111	0	0	-1.465	0.234076	0	0	-0.990045	0.50089	0
RFX2	ENSG00000087903	protein_coding	0	0	-0.0357097	0.95866	0	0	-0.183846	0.812791	0	0	-0.474954	0.448485	0
METTL2A	ENSG00000087995	protein_coding	0	0	-0.112202	0.749313	0	0	0.535885	0.183624	0	0	0.562822	0.168421	0
SULT2B1	ENSG00000088002	protein_coding	0	0	-2.83621	NA	0	0	-3.0497	NA	0	0	-3.47748	NA	0
ALG6	ENSG00000088035	protein_coding	0	0	-0.595164	0.0324112	0	1	-0.0635565	0.914427	0	0	-0.040955	0.947321	0
CNOT3	ENSG00000088038	protein_coding	0	0	-0.334902	0.572945	0	0	-0.607305	0.368892	0	0	-0.361843	0.645216	0
GP6	ENSG00000088053	protein_coding	0	0	NA	NA	0	0	NA	NA	0	0	-2.39584	NA	0
PTPN4	ENSG00000088179	protein_coding	0	0	-0.338674	0.220766	0	0	0.0227396	0.972385	0	0	0.65845	0.128523	0
DDX18	ENSG00000088205	protein_coding	0	0	-0.192978	0.245837	0	0	0.973079	3.03632e-09	1	0	1.23285	1.06168e-10	1
KHSRP	ENSG00000088247	protein_coding	0	0	0.281831	0.00543279	0	0	0.104002	0.548084	0	0	-0.369944	0.00749897	0
GNA11	ENSG00000088256	protein_coding	0	0	0.650275	0.00318935	1	0	0.33835	0.303553	0	0	-0.016135	0.972314	0
ASAP3	ENSG00000088280	protein_coding	0	0	NA	NA	0	0	NA	NA	0	0	NA	NA	0
EDEM2	ENSG00000088298	protein_coding	0	0	0.0711944	0.912338	0	0	-0.168439	0.825041	0	0	0.298122	0.691453	0
DNMT3B	ENSG00000088305	protein_coding	0	0	0.421551	0.0392818	1	0	0.134191	0.691512	0	0	0.184934	0.595714	0
REM1	ENSG00000088320	protein_coding	0	0	NA	NA	0	0	NA	NA	0	0	-4.26872	NA	0
TPX2	ENSG00000088325	protein_coding	0	0	-0.0862395	0.619757	0	0	0.136782	0.546552	0	0	0.591323	0.0051131	1
FER1L4	ENSG00000088340	transcribed_unitary_pseudogene	0	0	-0.67862	0.498198	0	0	-1.18775	0.316176	0	0	-1.24303	0.270405	0
PDRG1	ENSG00000088356	protein_coding	0	0	0.125888	0.780642	0	0	-0.0734459	0.915986	0	0	0.195228	0.75022	0
EPB41L1	ENSG00000088367	protein_coding	0	0	0.525866	0.0532314	0	0	0.309425	0.471297	0	0	0.00264767	0.996463	0
SLC15A1	ENSG00000088386	protein_coding	0	0	-0.380607	NA	0	0	0.588662	NA	0	0	-2.68576	NA	0
DOCK9	ENSG00000088387	protein_coding	0	0	0.354357	0.269553	0	0	0.479319	0.26375	0	0	0.677638	0.115021	0
ANKRD10	ENSG00000088448	protein_coding	0	1	-0.60213	0.0193039	0	1	-0.917497	0.00160447	0	1	-0.772663	0.0244011	0
TGDS	ENSG00000088451	protein_coding	0	0	0.155389	0.651531	0	0	0.639818	0.0876612	0	0	1.21744	0.00156463	1
DOCK3	ENSG00000088538	protein_coding	0	0	-0.293349	0.443762	0	0	-0.843419	0.0149467	0	1	-0.676726	0.090009	0
C3orf18	ENSG00000088543	protein_coding	0	0	0.222701	0.766141	0	0	0.300107	0.77278	0	0	0.51413	0.60247	0
COQ9	ENSG00000088682	protein_coding	0	0	0.152664	0.622471	0	0	0.545743	0.131995	0	0	0.722397	0.0530386	0
TMEM40	ENSG00000088726	protein_coding	0	0	0.340692	NA	0	0	0.588662	NA	0	0	0.421613	NA	0
KIF9	ENSG00000088727	protein_coding	0	0	-0.574573	0.557113	0	0	-0.91256	0.44148	0	0	-1.1698	0.258501	0
ARHGAP28	ENSG00000088756	protein_coding	0	0	0.562712	0.481789	0	0	0.682658	0.582087	0	0	1.31162	0.243392	0
CRLS1	ENSG00000088766	protein_coding	0	0	0.123374	0.695919	0	0	0.73696	0.0184767	1	0	0.87557	0.0080406	1
DEFB127	ENSG00000088782	protein_coding	0	0	NA	NA	0	0	NA	NA	0	0	NA	NA	0
PPP1R13B	ENSG00000088808	protein_coding	0	0	0.010531	0.985233	0	0	-0.137852	0.801168	0	0	-0.211969	0.666585	0
ATRN	ENSG00000088812	protein_coding	1	0	0.439587	0.011926	1	0	0.754218	0.00063751	1	0	0.958785	0.000122245	1
SMOX	ENSG00000088826	protein_coding	0	0	0.397517	0.533598	0	0	-0.354784	0.63457	0	0	-0.497713	0.450946	0
SIGLEC1	ENSG00000088827	protein_coding	0	0	NA	NA	0	0	NA	NA	0	0	-3.24543	NA	0
FKBP1A	ENSG00000088832	protein_coding	0	0	-0.175661	0.365163	0	0	-0.0414128	0.910679	0	0	-0.833902	3.1182e-05	0
NSFL1C	ENSG00000088833	protein_coding	0	0	-0.271871	0.266965	0	0	-0.0707794	0.876695	0	0	0.290326	0.423681	0
SLC4A11	ENSG00000088836	protein_coding	0	0	0.297879	0.623	0	0	0.0439592	0.966417	0	0	-0.460896	0.472054	0
C20orf194	ENSG00000088854	protein_coding	0	0	0.3116	0.49752	0	0	0.436237	0.477029	0	0	0.519587	0.384032	0
ZNF343	ENSG00000088876	protein_coding	0	0	0.110265	0.835201	0	0	0.11313	0.880556	0	0	0.452213	0.480845	0
EBF4	ENSG00000088881	protein_coding	0	0	0.0707091	0.929145	0	0	-0.711385	0.219294	0	0	-0.941807	0.0763895	0
CPXM1	ENSG00000088882	protein_coding	0	0	NA	NA	0	0	NA	NA	0	0	-2.64947	NA	0
MAVS	ENSG00000088888	protein_coding	0	0	0.259922	0.208169	0	0	0.17383	0.486631	0	0	-0.0152013	0.964492	0
LZTS3	ENSG00000088899	protein_coding	0	0	0.216882	0.631754	0	0	-0.159249	0.782913	0	0	-0.279236	0.598801	0
F11	ENSG00000088926	protein_coding	0	0	NA	NA	0	0	NA	NA	0	0	NA	NA	0
XRN2	ENSG00000088930	protein_coding	0	0	0.157199	0.291295	0	0	0.962385	2.67702e-10	1	0	1.60936	2.08003e-19	1
KIZ	ENSG00000088970	protein_coding	0	0	-0.370296	0.357126	0	0	-0.310172	0.618681	0	0	0.291527	0.665569	0
DYNLL1	ENSG00000088986	protein_coding	0	1	-1.04797	1.25601e-12	0	1	-0.691263	0.00355589	0	1	-0.10823	0.793958	0
TESC	ENSG00000088992	protein_coding	0	0	0.236143	0.82705	0	0	-0.761792	0.418496	0	0	-0.249932	0.845733	0
SNX5	ENSG00000089006	protein_coding	0	0	-0.231254	0.112233	0	0	0.0134966	0.965987	0	0	0.0276863	0.926798	0
RPL6	ENSG00000089009	protein_coding	0	1	-0.495085	1.81159e-08	0	1	-0.306613	0.0166477	0	1	0.26853	0.0834105	0
SIRPG	ENSG00000089012	protein_coding	0	0	NA	NA	0	0	NA	NA	0	0	NA	NA	0
MAPKAPK5	ENSG00000089022	protein_coding	0	0	0.0965255	0.73306	0	0	0.873167	0.0015014	1	0	0.971533	0.0010655	1
P2RX7	ENSG00000089041	protein_coding	0	0	-0.836273	NA	0	0	0.773432	NA	0	0	-0.446732	NA	0
ESF1	ENSG00000089048	protein_coding	0	0	-0.0965548	0.724437	0	0	0.755207	0.00813509	1	0	1.31662	4.52111e-05	1
RBBP9	ENSG00000089050	protein_coding	0	0	-0.358527	0.195386	0	0	0.261844	0.594682	0	0	0.531294	0.239815	0
ANAPC5	ENSG00000089053	protein_coding	0	0	-0.244537	0.106668	0	0	0.0162301	0.960219	0	0	-0.000305501	0.999408	0
SLC23A2	ENSG00000089057	protein_coding	0	0	0.558033	0.0241831	1	0	0.372759	0.192664	0	0	0.00610502	0.989208	0
SLC8B1	ENSG00000089060	protein_coding	0	0	0.458408	0.450117	0	0	-0.155516	0.865365	0	0	-0.271439	0.727525	0
TMEM230	ENSG00000089063	protein_coding	0	0	-0.463751	0.0229642	0	1	-0.134886	0.74348	0	0	0.0697996	0.878215	0
DZANK1	ENSG00000089091	protein_coding	0	0	-0.408365	0.666171	0	0	-0.254492	0.865371	0	0	-0.429741	0.728471	0
KDM2B	ENSG00000089094	protein_coding	0	0	0.472323	0.0242611	1	0	0.328476	0.282033	0	0	0.287469	0.391596	0
CFAP61	ENSG00000089101	protein_coding	0	0	0.651248	NA	0	0	1.39288	NA	0	0	-0.822658	NA	0
LHX5	ENSG00000089116	protein_coding	0	0	NA	NA	0	0	NA	NA	0	0	NA	NA	0
TASP1	ENSG00000089123	protein_coding	0	0	-0.0626141	0.917112	0	0	0.089077	0.91691	0	0	0.339475	0.63685	0
OAS1	ENSG00000089127	protein_coding	0	0	NA	NA	0	0	NA	NA	0	0	NA	NA	0
GCN1	ENSG00000089154	protein_coding	0	0	0.331108	0.0336136	1	0	0.00722933	0.982328	0	0	0.0259	0.933799	0
RPLP0	ENSG00000089157	protein_coding	0	1	-0.387576	0.000239836	0	1	-0.566389	2.47313e-06	0	1	-0.240365	0.146436	0
PXN	ENSG00000089159	protein_coding	0	0	0.735993	0.010455	1	0	-0.0948076	0.854809	0	0	-0.487275	0.177242	0
SIRT4	ENSG00000089163	protein_coding	0	0	-0.324422	NA	0	0	1.07421	NA	0	0	-0.335657	NA	0
RPH3A	ENSG00000089169	protein_coding	0	0	NA	NA	0	0	NA	NA	0	0	NA	NA	0
KIF16B	ENSG00000089177	protein_coding	0	0	0.391515	0.247411	0	0	0.358062	0.486631	0	0	0.68686	0.148341	0
TRMT6	ENSG00000089195	protein_coding	0	0	-0.0934351	0.803498	0	0	0.471466	0.262652	0	0	0.78672	0.0544144	0
CHGB	ENSG00000089199	protein_coding	0	0	0.255148	NA	0	0	1.18757	NA	0	0	-1.39362	NA	0
PEBP1	ENSG00000089220	protein_coding	0	0	0.396391	0.00727434	1	0	0.217259	0.30394	0	0	0.357497	0.0865662	0
TBX5	ENSG00000089225	protein_coding	0	0	NA	NA	0	0	NA	NA	0	0	NA	NA	0
BRAP	ENSG00000089234	protein_coding	0	0	-0.112889	0.744438	0	0	0.4179	0.28014	0	0	0.662713	0.0825397	0
ERP29	ENSG00000089248	protein_coding	0	0	-0.0464962	0.870252	0	0	-0.163828	0.603383	0	0	0.0395666	0.920624	0
NOS1	ENSG00000089250	protein_coding	0	0	NA	NA	0	0	NA	NA	0	0	NA	NA	0
FUS	ENSG00000089280	protein_coding	0	0	0.135186	0.440625	0	0	-0.0217696	0.941853	0	0	-0.02766	0.921808	0
IGBP1	ENSG00000089289	protein_coding	0	0	-0.803878	0.00098068	0	1	-0.266899	0.58211	0	0	-0.156257	0.776424	0
FXYD5	ENSG00000089327	protein_coding	0	0	-0.2348	0.657073	0	0	-0.931971	0.0423533	0	1	-1.00235	0.0328297	0
ZNF302	ENSG00000089335	protein_coding	0	0	-0.0151552	0.980084	0	0	0.149354	0.835872	0	0	0.364896	0.520297	0
GRAMD1A	ENSG00000089351	protein_coding	0	0	0.295054	0.218531	0	0	-0.377744	0.129592	0	0	-0.33178	0.22363	0
FXYD3	ENSG00000089356	protein_coding	0	0	NA	NA	0	0	-2.24617	NA	0	0	-3.47968	NA	0
HEPH	ENSG00000089472	protein_coding	0	0	NA	NA	0	0	NA	NA	0	0	NA	NA	0
CDIP1	ENSG00000089486	protein_coding	0	0	0.350682	0.689303	0	0	-0.137772	0.918023	0	0	-0.520911	0.582302	0
CMTM1	ENSG00000089505	protein_coding	0	0	-0.44795	0.745787	0	0	0.743166	NA	0	0	1.2896	NA	0
KCNH4	ENSG00000089558	protein_coding	0	0	-0.13403	0.930962	0	0	-0.290183	0.880439	0	0	-0.952477	0.486197	0
GANAB	ENSG00000089597	protein_coding	0	0	0.162029	0.162629	0	0	0.196028	0.181033	0	0	-0.189883	0.248247	0
GMIP	ENSG00000089639	protein_coding	0	0	0.279971	0.702805	0	0	-0.49568	0.44148	0	0	-0.524995	0.427566	0
RBM41	ENSG00000089682	protein_coding	0	0	-0.506493	0.103308	0	0	-0.18913	0.74368	0	0	-0.0265244	0.970286	0
BIRC5	ENSG00000089685	protein_coding	0	0	0.132141	0.412427	0	0	0.394745	0.0355869	1	0	0.10462	0.67258	0
LAG3	ENSG00000089692	protein_coding	0	0	1.43595	NA	0	0	0.732012	NA	0	0	-1.44167	0.406607	0
MLF2	ENSG00000089693	protein_coding	0	0	0.1465	0.468394	0	0	0.00807219	0.981309	0	0	-0.234584	0.288146	0
OTUB2	ENSG00000089723	protein_coding	0	0	1.45097	NA	0	0	0.355287	NA	0	0	2.36772	NA	0
DDX24	ENSG00000089737	protein_coding	0	0	1.36405	0.0781189	0	0	0.919383	0.417473	0	0	0.544006	0.685821	0
ZBTB25	ENSG00000089775	protein_coding	0	0	-0.576495	0.125061	0	0	-0.0689197	0.940906	0	0	-0.50924	0.376394	0
NECAP1	ENSG00000089818	protein_coding	0	0	0.138678	0.721387	0	0	0.0997132	0.86159	0	0	-0.291204	0.513164	0
ARHGAP4	ENSG00000089820	protein_coding	0	0	-1.22528	NA	0	0	-1.63649	NA	0	0	-2.68754	0.027171	0
ANKRD24	ENSG00000089847	protein_coding	0	0	0.327919	NA	0	0	-0.648458	NA	0	0	-0.181483	0.93995	0
DHX32	ENSG00000089876	protein_coding	1	0	0.498447	0.0210166	1	0	0.879956	0.00191599	1	0	1.14179	0.000178718	1
RCOR1	ENSG00000089902	protein_coding	0	0	0.116891	0.733305	0	0	0.431992	0.273965	0	0	0.430631	0.275989	0
GPATCH2L	ENSG00000089916	protein_coding	0	0	-0.0742102	0.807304	0	0	0.105128	0.781182	0	0	0.126979	0.727256	0
LTBP4	ENSG00000090006	protein_coding	0	0	0.151832	0.590244	0	0	-0.367358	0.210574	0	0	-0.628054	0.0204352	0
BLVRB	ENSG00000090013	protein_coding	0	0	-0.346463	0.419602	0	0	-0.533889	0.308585	0	0	-0.190953	0.789634	0
SLC9A1	ENSG00000090020	protein_coding	0	0	-0.245314	0.557707	0	0	-0.385282	0.475708	0	0	-1.36169	4.92715e-05	0
SPTLC1	ENSG00000090054	protein_coding	0	0	-0.023562	0.942173	0	0	0.79468	0.00297051	1	0	1.06787	0.000411116	1
PAPOLA	ENSG00000090060	protein_coding	0	0	-0.462182	3.85991e-05	0	1	0.0352285	0.907374	0	0	0.321865	0.165767	0
CCNK	ENSG00000090061	protein_coding	0	0	-0.638263	0.120769	0	0	-0.169803	0.857927	0	0	0.159456	0.860737	0
PCBP4	ENSG00000090097	protein_coding	0	0	0.314748	0.718179	0	0	-0.730063	0.351408	0	0	-0.802069	0.294176	0
RGS1	ENSG00000090104	protein_coding	0	0	-0.379116	NA	0	0	0.587413	NA	0	0	0.420332	NA	0
YPEL3	ENSG00000090238	protein_coding	0	0	0.5292	0.508656	0	0	-0.675892	0.392478	0	0	-0.594778	0.451069	0
MRPS33	ENSG00000090263	protein_coding	0	0	-0.49583	0.0942436	0	0	-0.325688	0.50744	0	0	-0.022786	0.973426	0
NDUFB2	ENSG00000090266	protein_coding	0	0	-0.347447	0.400241	0	0	-0.270395	0.67852	0	0	-0.595143	0.239291	0
NUDC	ENSG00000090273	protein_coding	0	0	-0.00365135	0.990891	0	0	-0.000353562	0.999608	0	0	0.0297877	0.936219	0
MAEA	ENSG00000090316	protein_coding	0	0	0.549465	0.0036558	1	0	0.390947	0.15662	0	0	0.361552	0.214776	0
ICAM1	ENSG00000090339	protein_coding	0	0	0.295221	NA	0	0	-1.15519	NA	0	0	-2.2276	NA	0
STRN4	ENSG00000090372	protein_coding	0	0	0.350112	0.0649779	0	0	0.166103	0.510787	0	0	-0.252121	0.288156	0
IRAK3	ENSG00000090376	protein_coding	0	0	-0.708373	NA	0	0	0.191555	NA	0	0	1.41952	NA	0
LYZ	ENSG00000090382	protein_coding	0	0	-3.1101	NA	0	0	NA	NA	0	0	NA	NA	0
SI	ENSG00000090402	protein_coding	0	0	NA	NA	0	0	NA	NA	0	0	NA	NA	0
MUL1	ENSG00000090432	protein_coding	0	0	0.334522	0.334344	0	0	0.164856	0.76644	0	0	-0.244377	0.620007	0
TFAP4	ENSG00000090447	protein_coding	0	0	0.141632	0.67499	0	0	-0.0542662	0.915986	0	0	-0.758508	0.00512909	0
PDCD7	ENSG00000090470	protein_coding	0	0	0.655683	0.0158299	1	0	0.615069	0.101467	0	0	0.8086	0.048736	1
SPG21	ENSG00000090487	protein_coding	0	0	-0.0913139	0.743782	0	0	0.667027	0.019022	1	0	0.326493	0.327933	0
FETUB	ENSG00000090512	protein_coding	0	0	NA	NA	0	0	NA	NA	0	0	NA	NA	0
DNAJB11	ENSG00000090520	protein_coding	0	0	0.0424846	0.932824	0	0	0.0378658	0.95851	0	0	0.0977007	0.871923	0
P3H2	ENSG00000090530	protein_coding	0	0	0.290442	NA	0	0	0.602169	NA	0	0	0.387308	0.849104	0
THPO	ENSG00000090534	protein_coding	0	0	0.138693	NA	0	0	-0.798866	NA	0	0	-1.50939	NA	0
CHRD	ENSG00000090539	protein_coding	0	0	0.527414	0.686615	0	0	-1.20249	0.190141	0	0	-0.499085	0.702544	0
FLT3LG	ENSG00000090554	protein_coding	0	0	-0.551679	NA	0	0	0.776833	NA	0	0	-1.22643	NA	0
RAB11FIP3	ENSG00000090565	protein_coding	0	0	1.19934	0.104855	0	0	-0.319909	0.758722	0	0	0.0373923	0.975846	0
GNPTG	ENSG00000090581	protein_coding	0	0	0.0886493	0.906511	0	0	-0.567102	0.375719	0	0	-0.777676	0.161016	0
ZNF268	ENSG00000090612	protein_coding	0	0	0.0586972	0.907346	0	0	0.578038	0.235616	0	0	1.01282	0.0385939	1
GOLGA3	ENSG00000090615	protein_coding	0	0	0.251684	0.459286	0	0	0.185857	0.703994	0	0	0.38451	0.383513	0
PABPC4	ENSG00000090621	protein_coding	0	0	0.231692	0.104249	0	0	0.0680302	0.78703	0	0	0.0901384	0.719288	0
CD209	ENSG00000090659	protein_coding	0	0	NA	NA	0	0	NA	NA	0	0	NA	NA	0
CERS4	ENSG00000090661	protein_coding	0	0	0.271507	0.685857	0	0	0.215373	0.808893	0	0	-0.903766	0.0770123	0
MCOLN1	ENSG00000090674	protein_coding	0	0	0.0614277	0.930009	0	0	-0.792485	0.129221	0	0	-1.03814	0.0347821	0
USP48	ENSG00000090686	protein_coding	0	0	-0.148925	0.458566	0	0	0.57675	0.0146645	1	0	0.803113	0.00143743	1
EFNB1	ENSG00000090776	protein_coding	0	0	0.735872	0.00475871	1	0	0.707534	0.0447294	1	0	0.485418	0.213229	0
PDPR	ENSG00000090857	protein_coding	0	0	0.110329	0.728778	0	0	0.172978	0.667932	0	0	-0.146884	0.74509	0
AARS	ENSG00000090861	protein_coding	1	0	0.905623	8.95614e-23	1	0	0.932421	5.93768e-14	1	0	0.898321	2.2803e-09	1
GLG1	ENSG00000090863	protein_coding	1	0	0.552084	0.000106702	1	0	0.512724	0.00652871	1	0	0.828185	2.64862e-05	1
KIF4A	ENSG00000090889	protein_coding	1	0	0.980909	1.83176e-09	1	0	0.968211	2.22495e-06	1	0	1.65611	1.65787e-12	1
TNRC6A	ENSG00000090905	protein_coding	0	0	0.0587913	0.841987	0	0	-0.0185126	0.966886	0	0	0.166316	0.603232	0
PLEKHG2	ENSG00000090924	protein_coding	0	0	0.130344	0.768295	0	0	-0.0689263	0.913361	0	0	-0.465443	0.252608	0
DLL3	ENSG00000090932	protein_coding	0	0	0.425151	0.634804	0	0	-0.0864839	0.955331	0	0	-0.509405	0.607414	0
NAT14	ENSG00000090971	protein_coding	0	0	0.375945	0.289785	0	0	-0.332652	0.464993	0	0	-0.475077	0.252034	0
PITPNM2	ENSG00000090975	protein_coding	0	0	0.270618	0.690059	0	0	-0.580202	0.390864	0	0	-0.475272	0.497167	0
EXOC1	ENSG00000090989	protein_coding	0	0	0.0859757	0.775343	0	0	1.05448	0.00022294	1	0	1.44994	5.57284e-07	1
RBM27	ENSG00000091009	protein_coding	0	0	-0.111892	0.755879	0	0	0.965262	0.00930108	1	0	1.46483	0.000342371	1
POU4F3	ENSG00000091010	protein_coding	0	0	0.342383	NA	0	0	0.587413	NA	0	0	-0.954976	NA	0
OSBPL8	ENSG00000091039	protein_coding	0	0	-0.156326	0.468394	0	0	1.14832	1.39838e-08	1	0	2.09869	6.18418e-21	1
DTX2	ENSG00000091073	protein_coding	0	0	-0.178462	0.866623	0	0	-0.67561	0.521361	0	0	-0.620003	0.556239	0
NLRC4	ENSG00000091106	protein_coding	0	0	-0.468813	NA	0	0	-1.21015	NA	0	0	-1.38655	0.455181	0
PUS7	ENSG00000091127	protein_coding	0	0	-0.353478	0.0815272	0	0	0.269094	0.471297	0	0	0.451682	0.178235	0
LAMB4	ENSG00000091128	protein_coding	0	0	-2.76038	NA	0	0	-2.39655	NA	0	0	-2.92957	NA	0
NRCAM	ENSG00000091129	protein_coding	0	0	-0.137463	0.732338	0	0	0.910095	0.0420632	1	0	1.18035	0.0155259	1
LAMB1	ENSG00000091136	protein_coding	1	0	0.741641	5.33868e-07	1	0	0.596198	0.0025571	1	0	0.717388	0.000720868	1
SLC26A4	ENSG00000091137	protein_coding	0	0	0.726427	NA	0	0	0.0157531	NA	0	0	-0.802029	NA	0
SLC26A3	ENSG00000091138	protein_coding	0	0	-2.45911	NA	0	0	-4.45813	NA	0	0	-3.47968	NA	0
DLD	ENSG00000091140	protein_coding	0	0	-0.0549611	0.80068	0	0	1.04097	5.59937e-10	1	0	1.0671	1.48929e-08	1
WDR7	ENSG00000091157	protein_coding	0	0	0.0864897	0.848523	0	0	0.340277	0.492587	0	0	0.6247	0.177213	0
TXNL1	ENSG00000091164	protein_coding	0	0	-0.380711	0.100812	0	0	0.311143	0.456134	0	0	0.41199	0.320494	0
IL5RA	ENSG00000091181	protein_coding	0	0	-0.380614	NA	0	0	-1.70458	NA	0	0	-0.953744	NA	0
ABCC6	ENSG00000091262	protein_coding	0	0	1.62057	NA	0	0	2.5872	NA	0	0	2.4201	NA	0
CMTM6	ENSG00000091317	protein_coding	0	0	0.0119549	0.972095	0	0	1.13047	3.5313e-06	1	0	1.37398	2.45991e-07	1
ITGA6	ENSG00000091409	protein_coding	0	0	-0.452905	0.111735	0	0	0.775123	0.076992	0	0	0.877326	0.0552458	0
RAPGEF4	ENSG00000091428	protein_coding	0	0	0.127636	0.835619	0	0	0.288662	0.703509	0	0	0.35149	0.623339	0
AC013461.1	ENSG00000091436	protein_coding	0	0	-0.433253	0.0620354	0	0	0.315217	0.454114	0	0	0.879125	0.0323074	1
SMPX	ENSG00000091482	protein_coding	0	0	0.430615	NA	0	0	2.1731	NA	0	0	0.438464	NA	0
FH	ENSG00000091483	protein_coding	1	0	0.392228	0.0200244	1	0	0.992734	4.09241e-06	1	0	1.65782	6.04407e-12	1
SEL1L3	ENSG00000091490	protein_coding	0	0	-0.10588	0.847571	0	0	0.368922	0.574535	0	0	0.578922	0.344117	0
TF	ENSG00000091513	protein_coding	0	0	-1.12144	NA	0	0	0.587413	NA	0	0	-1.18524	NA	0
CDV3	ENSG00000091527	protein_coding	0	0	0.112295	0.456813	0	0	0.781389	2.3242e-08	1	0	1.33401	1.47652e-16	1
MYO15A	ENSG00000091536	protein_coding	0	0	0.359275	0.779556	0	0	-1.21631	0.232184	0	0	-0.965362	0.382136	0
ALKBH5	ENSG00000091542	protein_coding	0	0	0.477499	0.00233612	1	0	0.358032	0.064784	0	0	0.0600313	0.829629	0
APOH	ENSG00000091583	protein_coding	0	0	NA	NA	0	0	NA	NA	0	0	NA	NA	0
NLRP1	ENSG00000091592	protein_coding	0	0	0.18445	0.725978	0	0	0.687805	0.256837	0	0	0.488785	0.414081	0
PITPNM3	ENSG00000091622	protein_coding	0	0	0.542595	0.456464	0	0	-0.326484	0.727464	0	0	-0.666251	0.360209	0
SPAG7	ENSG00000091640	protein_coding	0	0	0.0949452	0.803498	0	0	-0.182988	0.667418	0	0	-0.250046	0.528632	0
ORC6	ENSG00000091651	protein_coding	0	0	0.00627879	0.98688	0	0	0.3329	0.333233	0	0	0.681139	0.0361153	1
ZFHX4	ENSG00000091656	protein_coding	0	0	0.172242	0.44977	0	0	0.00961483	0.981085	0	0	0.025803	0.944228	0
SLC17A6	ENSG00000091664	protein_coding	0	0	NA	NA	0	0	NA	NA	0	0	NA	NA	0
CPA1	ENSG00000091704	protein_coding	0	0	1.17313	NA	0	0	-0.0783629	NA	0	0	0.292956	NA	0
ZC3HC1	ENSG00000091732	protein_coding	0	0	0.0994929	0.827862	0	0	-0.234645	0.649663	0	0	-0.0515973	0.936123	0
ESR1	ENSG00000091831	protein_coding	0	0	-0.0689833	NA	0	0	-1.9605	NA	0	0	-0.635829	NA	0
RGS17	ENSG00000091844	protein_coding	0	0	-0.802498	0.024621	0	1	-0.659066	0.255168	0	0	-0.548277	0.394124	0
ANGPT2	ENSG00000091879	protein_coding	0	0	-1.7448	NA	0	0	-2.34708	NA	0	0	-2.95079	0.0651836	0
TMEM101	ENSG00000091947	protein_coding	0	0	0.03723	0.924477	0	0	-0.0120377	0.982328	0	0	-0.12205	0.776815	0
CD200	ENSG00000091972	protein_coding	0	0	NA	NA	0	0	NA	NA	0	0	NA	NA	0
CCDC80	ENSG00000091986	protein_coding	0	0	0.397358	0.585078	0	0	0.121663	0.91608	0	0	0.614036	0.511075	0
CMA1	ENSG00000092009	protein_coding	0	0	-0.379048	NA	0	0	0.587413	NA	0	0	-2.93034	NA	0
PSME1	ENSG00000092010	protein_coding	0	0	-0.396547	0.197229	0	0	0.194995	0.729374	0	0	0.847705	0.0734373	0
PPP2R3C	ENSG00000092020	protein_coding	0	0	-0.525747	0.201082	0	0	0.343599	0.672067	0	0	0.693262	0.36299	0
HAUS4	ENSG00000092036	protein_coding	0	0	0.322322	0.573196	0	0	0.4192	0.586618	0	0	0.790149	0.291344	0
JPH4	ENSG00000092051	protein_coding	0	0	-0.333042	NA	0	0	-1.32946	NA	0	0	-1.8543	NA	0
MYH7	ENSG00000092054	protein_coding	0	0	0.342383	NA	0	0	0.587413	NA	0	0	0.420332	NA	0
CEBPE	ENSG00000092067	protein_coding	0	0	0.342383	NA	0	0	0.587413	NA	0	0	0.420332	NA	0
SLC7A8	ENSG00000092068	protein_coding	0	0	-0.116826	0.878298	0	0	-0.0601477	0.95899	0	0	-0.454327	0.546751	0
OSGEP	ENSG00000092094	protein_coding	0	0	-0.233179	0.463486	0	0	-0.140002	0.780322	0	0	0.202452	0.667138	0
SLC22A17.1	ENSG00000092096	protein_coding	0	0	0.705276	0.547931	0	0	-1.1603	0.216452	0	0	-0.957912	0.373507	0
RNF31	ENSG00000092098	protein_coding	0	0	0.224735	0.673347	0	0	-0.413806	0.461853	0	0	-0.619648	0.226544	0
SCFD1	ENSG00000092108	protein_coding	0	0	-0.595278	0.00834141	0	1	0.258353	0.538161	0	0	0.942282	0.00498109	1
G2E3	ENSG00000092140	protein_coding	0	0	-0.604369	0.00559409	0	1	0.248778	0.532983	0	0	0.897175	0.0100811	1
HECTD1	ENSG00000092148	protein_coding	0	0	0.224308	0.136187	0	0	1.09295	9.90694e-15	1	0	1.52507	1.6418e-20	1
HNRNPC	ENSG00000092199	protein_coding	0	0	-0.134341	0.263553	0	0	0.702041	3.6928e-11	1	0	1.01637	1.87908e-16	1
RPGRIP1	ENSG00000092200	protein_coding	0	0	1.4769	NA	0	0	0.428699	NA	0	0	1.56083	NA	0
SUPT16H	ENSG00000092201	protein_coding	1	0	0.548178	4.28826e-09	1	0	1.20878	1.08876e-23	1	0	1.54423	1.48562e-30	1
TOX4	ENSG00000092203	protein_coding	0	0	-0.0316644	0.924814	0	0	0.442635	0.151088	0	0	0.345037	0.311554	0
GEMIN2	ENSG00000092208	protein_coding	0	0	-0.495677	0.0994769	0	0	0.876562	0.043999	1	0	1.27798	0.00508233	1
TGM1	ENSG00000092295	protein_coding	0	0	1.68391	NA	0	0	-2.41165	NA	0	0	-1.97936	0.337838	0
TINF2	ENSG00000092330	protein_coding	0	0	0.00147474	0.998004	0	0	-0.00205065	0.998101	0	0	0.226043	0.702901	0
DAZL	ENSG00000092345	protein_coding	0	0	NA	NA	0	0	NA	NA	0	0	NA	NA	0
TBL1Y	ENSG00000092377	protein_coding	0	0	NA	NA	0	0	NA	NA	0	0	NA	NA	0
SEMA6A	ENSG00000092421	protein_coding	0	0	0.041644	0.927608	0	0	-0.0143465	0.981632	0	0	0.0687394	0.898691	0
TRPM7	ENSG00000092439	protein_coding	0	0	-0.609648	0.00600721	0	1	0.280403	0.406014	0	0	0.591205	0.0511553	0
TYRO3	ENSG00000092445	protein_coding	0	0	0.467333	0.0797714	0	0	0.0266045	0.962349	0	0	-0.197132	0.619849	0
WDR76	ENSG00000092470	protein_coding	0	0	-0.0934419	0.807517	0	0	0.536328	0.179339	0	0	0.977569	0.0187903	1
CAPN3	ENSG00000092529	protein_coding	0	0	0.51054	NA	0	0	-1.27568	NA	0	0	-0.968822	NA	0
SNAP23	ENSG00000092531	protein_coding	0	0	-0.266106	0.411236	0	0	0.469302	0.332033	0	0	0.798953	0.0794807	0
TBX15	ENSG00000092607	protein_coding	0	0	-1.40281	NA	0	0	-2.98182	NA	0	0	-2.13017	NA	0
PHGDH	ENSG00000092621	protein_coding	0	0	0.115035	0.336308	0	0	0.30883	0.0183694	1	0	0.330051	0.0517243	0
COL9A3	ENSG00000092758	protein_coding	0	0	0.245813	0.846018	0	0	0.149535	0.936482	0	0	-0.341886	0.808485	0
EZR	ENSG00000092820	protein_coding	1	0	0.669152	1.85689e-07	1	0	0.642523	0.000307233	1	0	0.785726	0.000134746	1
MYL6	ENSG00000092841	protein_coding	0	1	-0.512835	0.00177142	0	1	-0.66773	0.00115595	0	1	-0.805205	0.000130911	0
AGO1	ENSG00000092847	protein_coding	0	0	0.0421996	0.872923	0	0	0.296459	0.20438	0	0	0.087861	0.772687	0
TEKT2	ENSG00000092850	protein_coding	0	0	0.984845	NA	0	0	-0.721958	NA	0	0	-0.0331834	NA	0
CLSPN	ENSG00000092853	protein_coding	1	0	0.544433	0.00354868	1	0	1.09173	1.71077e-06	1	0	1.39866	3.42786e-08	1
RFFL	ENSG00000092871	protein_coding	0	0	0.146989	0.856601	0	0	0.0597726	0.958924	0	0	-0.7937	0.205963	0
UNC13D	ENSG00000092929	protein_coding	0	0	-0.318304	NA	0	0	-1.72702	0.129592	0	0	-1.84014	0.0930253	0
MFSD11	ENSG00000092931	protein_coding	0	0	-0.425482	0.238346	0	0	-0.406609	0.40457	0	0	-0.505833	0.275502	0
DPYSL2	ENSG00000092964	protein_coding	0	0	-0.159664	0.552574	0	0	0.0302099	0.954009	0	0	-0.391556	0.204537	0
TGFB2	ENSG00000092969	protein_coding	0	0	-0.521914	0.709561	0	0	-0.30217	NA	0	0	0.0274511	0.991004	0
GPATCH2	ENSG00000092978	protein_coding	0	0	-0.105471	0.767407	0	0	0.204118	0.67235	0	0	0.82782	0.0372748	1
NUP50	ENSG00000093000	protein_coding	0	0	0.185397	0.250275	0	0	0.800817	2.29595e-06	1	0	1.25835	2.22454e-11	1
CDC45	ENSG00000093009	protein_coding	0	0	0.00787634	0.980191	0	0	0.167984	0.596214	0	0	0.307586	0.292201	0
COMT	ENSG00000093010	protein_coding	0	0	0.235553	0.339402	0	0	-0.0715357	0.86881	0	0	0.00586598	0.989731	0
CECR1	ENSG00000093072	protein_coding	0	0	1.20628	NA	0	0	-1.20336	NA	0	0	-1.54946	NA	0
XXbac-B461K10.4	ENSG00000093100	processed_transcript	0	0	-1.82281	NA	0	0	-3.30555	NA	0	0	-3.47968	NA	0
VNN3	ENSG00000093134	protein_coding	0	0	NA	NA	0	0	NA	NA	0	0	NA	NA	0
[truncated: 55,994 more rows]

## Sheet: B-sorbitol
sorbitol					G3BP1 vs. untargeted				post- vs. pre- enrichment				label vs. omit probe
geneName	geneID	geneType	SG-proximal?	SG-excluded?	log2FC	padj	enriched?	depleted?	log2FC	padj	enriched?	depleted?	log2FC	padj	enriched?
TSPAN6	ENSG00000000003	protein_coding	1	0	0.454356	0.00624192	1	0	1.13644	3.35666e-10	1	0	1.08798	1.67267e-05	1
TNMD	ENSG00000000005	protein_coding	0	0	-0.871642	NA	0	0	-1.48022	NA	0	0	-0.637161	NA	0
DPM1	ENSG00000000419	protein_coding	0	0	0.365804	0.296845	0	0	0.495444	0.1748	0	0	0.818082	0.0583333	0
SCYL3	ENSG00000000457	protein_coding	0	0	-0.696096	0.0607014	0	0	0.268989	0.681113	0	0	-0.202974	0.801696	0
C1orf112	ENSG00000000460	protein_coding	0	0	-0.260402	0.475277	0	0	0.0982743	0.837012	0	0	0.279332	0.651731	0
FGR	ENSG00000000938	protein_coding	0	0	-2.40324	NA	0	0	-2.25388	NA	0	0	NA	NA	0
CFH	ENSG00000000971	protein_coding	0	0	1.45006	NA	0	0	0.205173	NA	0	0	-1.21458	NA	0
FUCA2	ENSG00000001036	protein_coding	0	0	0.517824	0.0467442	1	0	0.398344	0.156163	0	0	0.66436	0.0569993	0
GCLC	ENSG00000001084	protein_coding	0	0	0.394197	0.177341	0	0	0.803666	0.00375308	1	0	1.02055	0.00327383	1
NFYA	ENSG00000001167	protein_coding	1	0	0.746725	1.78749e-05	1	0	1.01307	4.74571e-08	1	0	1.127	1.27957e-05	1
STPG1	ENSG00000001460	protein_coding	0	0	-0.337027	0.644485	0	0	-0.769959	0.222921	0	0	-0.541814	0.521486	0
NIPAL3	ENSG00000001461	protein_coding	0	0	-0.185411	0.632946	0	0	0.0351145	0.945189	0	0	-0.0142461	0.983539	0
LAS1L	ENSG00000001497	protein_coding	0	0	0.0108012	0.972811	0	0	0.217275	0.31359	0	0	0.385302	0.246892	0
ENPP4	ENSG00000001561	protein_coding	0	0	0.417901	0.260611	0	0	1.55808	3.15096e-05	1	0	1.16846	0.012124	1
SEMA3F	ENSG00000001617	protein_coding	0	0	-1.09136	0.0711191	0	0	-1.26806	0.0691519	0	0	-0.796804	0.395746	0
CFTR	ENSG00000001626	protein_coding	0	0	-1.00501	NA	0	0	-0.749684	NA	0	0	-0.59391	NA	0
ANKIB1	ENSG00000001629	protein_coding	0	0	0.117131	0.732995	0	0	0.43982	0.14043	0	0	0.493101	0.200728	0
CYP51A1	ENSG00000001630	protein_coding	0	0	0.959915	0.146318	0	0	0.600684	0.391895	0	0	-0.0540952	0.95618	0
KRIT1	ENSG00000001631	protein_coding	0	0	0.040489	0.919463	0	0	0.686755	0.0134727	1	0	0.672821	0.0591889	0
RAD52	ENSG00000002016	protein_coding	0	0	-0.456691	0.439623	0	0	-0.185317	0.807211	0	0	-0.453488	0.565101	0
MYH16	ENSG00000002079	unitary_pseudogene	0	0	-0.938948	NA	0	0	-1.15331	NA	0	0	-1.56924	NA	0
BAD	ENSG00000002330	protein_coding	0	0	-0.978384	0.338026	0	0	-1.18043	0.317613	0	0	-1.17706	0.333646	0
LAP3	ENSG00000002549	protein_coding	0	0	0.219762	0.379813	0	0	0.200719	0.461016	0	0	0.53322	0.123738	0
CD99	ENSG00000002586	protein_coding	0	0	-0.306184	0.195352	0	0	-0.654931	0.000876804	0	1	-0.370814	0.290784	0
HS3ST1	ENSG00000002587	protein_coding	0	0	NA	NA	0	0	NA	NA	0	0	-1.99497	NA	0
AOC1	ENSG00000002726	protein_coding	0	0	-2.45319	NA	0	0	NA	NA	0	0	NA	NA	0
WNT16	ENSG00000002745	protein_coding	0	0	-0.681894	NA	0	0	-0.797042	NA	0	0	-1.33485	0.426999	0
HECW1	ENSG00000002746	protein_coding	0	0	-0.406876	NA	0	0	-1.16675	0.355004	0	0	-1.0102	0.540937	0
MAD1L1	ENSG00000002822	protein_coding	0	1	-0.626327	0.0497775	0	1	-0.861464	0.00645787	0	1	-0.36239	0.511088	0
LASP1	ENSG00000002834	protein_coding	0	0	-0.00755651	0.988238	0	0	-0.105481	0.783723	0	0	-0.44347	0.258771	0
SNX11	ENSG00000002919	protein_coding	0	0	0.625383	0.161462	0	0	-0.216285	0.672017	0	0	-0.0908459	0.903917	0
TMEM176A	ENSG00000002933	protein_coding	0	0	NA	NA	0	0	NA	NA	0	0	-2.91218	NA	0
M6PR	ENSG00000003056	protein_coding	0	0	0.381573	0.22687	0	0	0.231049	0.500057	0	0	0.362551	0.392958	0
KLHL13	ENSG00000003096	protein_coding	0	0	0.429674	0.217882	0	0	0.99654	0.00384289	1	0	1.26596	0.00209839	1
CYP26B1	ENSG00000003137	protein_coding	0	0	0.790394	0.290528	0	0	0.884765	0.297722	0	0	0.810887	0.408469	0
ICA1	ENSG00000003147	protein_coding	0	0	0.218715	0.831791	0	0	0.761214	0.463373	0	0	0.700089	0.56996	0
DBNDD1	ENSG00000003249	protein_coding	0	0	-0.323213	0.583646	0	0	-0.999204	0.00671689	0	1	-0.700066	0.207297	0
ALS2	ENSG00000003393	protein_coding	0	0	-0.00994125	0.979782	0	0	0.704428	0.00701994	1	0	0.782453	0.0407936	1
CASP10	ENSG00000003400	protein_coding	0	0	0.566602	0.543781	0	0	0.65069	0.520817	0	0	0.16182	0.90301	0
CFLAR	ENSG00000003402	protein_coding	0	0	-0.0541728	0.927175	0	0	0.393438	0.414542	0	0	-0.0452061	0.95062	0
TFPI	ENSG00000003436	protein_coding	0	0	0.535503	0.368946	0	0	0.869384	0.164429	0	0	0.900361	0.202571	0
NDUFAF7	ENSG00000003509	protein_coding	0	0	-0.211181	0.703304	0	0	0.694753	0.239877	0	0	0.541935	0.444363	0
RBM5	ENSG00000003756	protein_coding	0	0	-0.226558	0.44631	0	0	0.179227	0.62945	0	0	0.179317	0.715218	0
MTMR7	ENSG00000003987	protein_coding	0	0	-0.219106	0.834352	0	0	-0.356203	0.724062	0	0	-0.32253	0.799086	0
SLC7A2	ENSG00000003989	protein_coding	0	0	0.184292	0.41725	0	0	1.13054	3.28902e-09	1	0	0.942995	0.00150297	1
ARF5	ENSG00000004059	protein_coding	0	0	-0.0283563	0.950644	0	0	-0.45144	0.117237	0	0	-0.392224	0.321067	0
SARM1	ENSG00000004139	protein_coding	0	0	-0.302683	0.605917	0	0	-0.675925	0.192218	0	0	-0.613837	0.341796	0
POLDIP2	ENSG00000004142	protein_coding	0	0	0.160554	0.522006	0	0	-0.221061	0.316889	0	0	-0.413051	0.161286	0
PLXND1	ENSG00000004399	protein_coding	0	0	-0.362571	0.348123	0	0	-0.593146	0.116568	0	0	-0.285048	0.646279	0
AK2	ENSG00000004455	protein_coding	0	0	0.181171	0.242605	0	0	0.161714	0.247222	0	0	0.258525	0.337252	0
CD38	ENSG00000004468	protein_coding	0	0	-0.934854	NA	0	0	0.685204	NA	0	0	0.841819	NA	0
FKBP4	ENSG00000004478	protein_coding	0	0	-0.253223	0.108955	0	0	-0.172012	0.32414	0	0	0.109596	0.765928	0
KDM1A	ENSG00000004487	protein_coding	0	0	-0.063653	0.776989	0	0	0.568588	1.44626e-05	1	0	0.659466	0.00501473	1
RBM6	ENSG00000004534	protein_coding	0	0	-0.219072	0.421439	0	0	-0.382719	0.132898	0	0	-0.182153	0.735418	0
CAMKK1	ENSG00000004660	protein_coding	0	0	0.164472	0.733452	0	0	0.00831502	0.989352	0	0	0.518561	0.354649	0
RECQL	ENSG00000004700	protein_coding	0	0	0.256378	0.400754	0	0	1.16997	5.18839e-05	1	0	1.38828	7.88922e-05	1
VPS50	ENSG00000004766	protein_coding	0	0	0.208583	0.567668	0	0	1.00226	0.000904425	1	0	0.999563	0.00824503	1
HSPB6	ENSG00000004776	protein_coding	0	0	-1.53943	NA	0	0	-3.9376	NA	0	0	-3.28293	NA	0
ARHGAP33	ENSG00000004777	protein_coding	0	0	-0.502919	0.656855	0	0	-1.21361	0.15201	0	0	-0.894691	0.437126	0
NDUFAB1	ENSG00000004779	protein_coding	0	0	0.295025	0.370459	0	0	-0.157944	0.643552	0	0	0.618535	0.136088	0
PDK4	ENSG00000004799	protein_coding	0	0	-0.213282	NA	0	0	-0.15206	NA	0	0	1.06405	NA	0
SLC22A16	ENSG00000004809	protein_coding	0	0	NA	NA	0	0	NA	NA	0	0	NA	NA	0
ZMYND10	ENSG00000004838	protein_coding	0	0	-0.517386	NA	0	0	-0.884275	NA	0	0	-1.03805	NA	0
ABCB5	ENSG00000004846	protein_coding	0	0	-0.0522033	NA	0	0	2.27006	NA	0	0	-0.0176861	NA	0
ARX	ENSG00000004848	protein_coding	0	0	-0.522572	NA	0	0	-1.58637	NA	0	0	-1.59212	NA	0
SLC25A13	ENSG00000004864	protein_coding	0	0	-0.028229	0.936299	0	0	0.521059	0.0249613	1	0	0.422798	0.21577	0
ST7	ENSG00000004866	protein_coding	0	0	-0.063336	0.935266	0	0	0.098926	0.900509	0	0	-0.253536	0.776897	0
CDC27	ENSG00000004897	protein_coding	0	0	0.155894	0.41877	0	0	0.647716	3.54591e-06	1	0	0.756474	0.000912546	1
SLC4A1	ENSG00000004939	protein_coding	0	0	-0.391447	NA	0	0	-1.15767	NA	0	0	-1.76119	NA	0
CALCR	ENSG00000004948	protein_coding	0	0	2.52981	NA	0	0	3.49773	NA	0	0	-0.409832	NA	0
HCCS	ENSG00000004961	protein_coding	0	0	0.437385	0.211596	0	0	0.0245567	0.961751	0	0	0.20684	0.707798	0
DVL2	ENSG00000004975	protein_coding	0	0	-0.242669	0.272603	0	0	-0.0924532	0.744263	0	0	-0.00171152	0.997318	0
PRSS22	ENSG00000005001	protein_coding	0	0	NA	NA	0	0	NA	NA	0	0	NA	NA	0
UPF1	ENSG00000005007	protein_coding	0	0	-0.176085	0.396081	0	0	-0.379163	0.0192233	0	1	-0.0210408	0.961472	0
SKAP2	ENSG00000005020	protein_coding	0	0	0.311508	0.288922	0	0	1.2509	3.28798e-05	1	0	0.892558	0.0259888	1
SLC25A5	ENSG00000005022	protein_coding	0	0	-0.200118	0.162472	0	0	-0.266406	0.0130073	0	0	0.017835	0.961511	0
MCUB	ENSG00000005059	protein_coding	0	0	0.0310384	0.961104	0	0	0.204791	0.698279	0	0	0.387622	0.539827	0
HOXA11	ENSG00000005073	protein_coding	0	0	0.65019	0.121768	0	0	0.49199	0.309531	0	0	0.609253	0.284535	0
POLR2J	ENSG00000005075	protein_coding	0	0	-0.429944	0.554804	0	0	-1.48827	0.000336827	0	1	-0.972175	0.0999267	0
DHX33	ENSG00000005100	protein_coding	1	0	0.706437	4.38907e-07	1	0	0.638384	4.74867e-05	1	0	0.767396	0.00104717	1
MEOX1	ENSG00000005102	protein_coding	0	0	0.807784	NA	0	0	1.54444	NA	0	0	1.76767	NA	0
THSD7A	ENSG00000005108	protein_coding	0	0	-0.950803	NA	0	0	-0.124166	NA	0	0	-0.400855	NA	0
LIG3	ENSG00000005156	protein_coding	0	0	0.169315	0.589042	0	0	0.466129	0.0551195	0	0	0.423923	0.21995	0
RPAP3	ENSG00000005175	protein_coding	0	0	0.133942	0.653781	0	0	0.518351	0.0253952	1	0	0.968853	0.00119738	1
ACSM3	ENSG00000005187	protein_coding	0	0	-0.467892	NA	0	0	-0.935492	NA	0	0	-0.326451	NA	0
AC004381.6	ENSG00000005189	protein_coding	0	0	0.783174	0.0866055	0	0	0.715824	0.153624	0	0	0.736009	0.214266	0
CIAPIN1	ENSG00000005194	protein_coding	0	0	0.115656	0.759695	0	0	-0.229359	0.475091	0	0	0.0219105	0.970167	0
SPPL2B	ENSG00000005206	protein_coding	0	0	-0.539402	0.309687	0	0	-0.952621	0.0756532	0	0	-0.628556	0.367449	0
FAM214B	ENSG00000005238	protein_coding	0	0	0.399101	NA	0	0	0.0431809	NA	0	0	0.613985	NA	0
COPZ2	ENSG00000005243	protein_coding	0	0	-2.68713	NA	0	0	-3.56	NA	0	0	-2.63776	NA	0
PRKAR2B	ENSG00000005249	protein_coding	0	0	0.0801274	0.866523	0	0	0.708888	0.0542776	0	0	0.910717	0.035392	1
MSL3	ENSG00000005302	protein_coding	0	0	0.0331499	0.954003	0	0	0.177083	0.71231	0	0	0.420671	0.430784	0
CREBBP	ENSG00000005339	protein_coding	0	0	-0.232098	0.272182	0	0	-0.548308	7.05662e-05	0	1	-0.373049	0.190348	0
TSPOAP1	ENSG00000005379	protein_coding	0	0	-1.35943	NA	0	0	-3.01628	NA	0	0	-2.1768	NA	0
MPO	ENSG00000005381	protein_coding	0	0	-1.71461	NA	0	0	NA	NA	0	0	-1.99497	NA	0
PON1	ENSG00000005421	protein_coding	0	0	-0.872379	NA	0	0	-2.14277	NA	0	0	-1.53896	NA	0
GCFC2	ENSG00000005436	protein_coding	0	0	0.336786	0.181471	0	0	0.795307	0.00112916	1	0	0.740543	0.0212864	1
WDR54	ENSG00000005448	protein_coding	0	0	-0.236677	0.621788	0	0	-0.562687	0.212351	0	0	-0.289354	0.658581	0
CROT	ENSG00000005469	protein_coding	0	0	0.240674	0.697961	0	0	0.84508	0.171574	0	0	0.75762	0.284916	0
ABCB4	ENSG00000005471	protein_coding	0	0	0.0117599	NA	0	0	0.133133	NA	0	0	0.0261368	0.989355	0
KMT2E	ENSG00000005483	protein_coding	0	0	-0.3443	0.137411	0	0	-0.00763832	0.984454	0	0	0.157868	0.728886	0
RHBDD2	ENSG00000005486	protein_coding	0	0	-0.478538	0.229822	0	0	-0.875812	0.00848508	0	1	-1.1342	0.00787286	0
SOX8	ENSG00000005513	protein_coding	0	0	0.46071	0.447523	0	0	0.19289	0.791413	0	0	0.940331	0.251241	0
IBTK	ENSG00000005700	protein_coding	0	0	0.53711	0.809232	0	0	2.1042	0.384488	0	0	2.39033	0.0331813	1
ZNF195	ENSG00000005801	protein_coding	0	0	0.0107239	0.984748	0	0	0.406029	0.320162	0	0	0.684161	0.163516	0
MYCBP2	ENSG00000005810	protein_coding	0	0	-0.110275	0.465127	0	0	0.370041	0.000325662	1	0	0.519933	0.0106739	1
FBXL3	ENSG00000005812	protein_coding	1	0	0.485797	0.00498357	1	0	1.55624	6.42921e-17	1	0	1.45084	1.14596e-08	1
ITGAL	ENSG00000005844	protein_coding	0	0	-0.677029	NA	0	0	-0.913719	NA	0	0	-1.61533	0.240653	0
PDK2	ENSG00000005882	protein_coding	0	0	-0.151779	0.818959	0	0	-0.397944	0.498542	0	0	-0.285297	0.7178	0
ITGA3	ENSG00000005884	protein_coding	0	0	-0.32628	0.740667	0	0	-0.402857	0.649843	0	0	-0.178066	0.889182	0
ZFX	ENSG00000005889	protein_coding	1	0	0.610811	1.47168e-06	1	0	1.01553	1.73457e-13	1	0	1.11318	2.98985e-06	1
LAMP2	ENSG00000005893	protein_coding	0	0	0.235815	0.139808	0	0	0.924225	2.20791e-10	1	0	0.698211	0.0138341	1
ITGA2B	ENSG00000005961	protein_coding	0	0	0.00937639	0.994493	0	0	-0.453727	0.582911	0	0	-0.377058	0.704693	0
ASB4	ENSG00000005981	protein_coding	0	0	0.434999	NA	0	0	0.685204	NA	0	0	0.841819	NA	0
GDE1	ENSG00000006007	protein_coding	1	0	0.719531	0.000200998	1	0	0.809162	0.000212716	1	0	0.830835	0.00389537	1
C19orf60	ENSG00000006015	protein_coding	0	0	-0.800954	0.118441	0	0	-1.28316	0.0127337	0	1	-1.25416	0.0340174	0
CRLF1	ENSG00000006016	protein_coding	0	0	-0.0166164	0.991216	0	0	-0.416863	0.69908	0	0	-0.480422	0.695155	0
OSBPL7	ENSG00000006025	protein_coding	0	0	-1.57743	0.132629	0	0	-1.83954	0.0997552	0	0	-1.11843	0.511028	0
TMEM98	ENSG00000006042	protein_coding	0	0	0.451164	0.162472	0	0	0.0665729	0.882392	0	0	0.13756	0.807078	0
YBX2	ENSG00000006047	protein_coding	0	0	-2.63613	NA	0	0	-3.06379	NA	0	0	-2.65875	NA	0
KRT33A	ENSG00000006059	protein_coding	0	0	NA	NA	0	0	NA	NA	0	0	NA	NA	0
MAP3K14	ENSG00000006062	protein_coding	0	0	0.151863	0.903711	0	0	-0.403101	0.688358	0	0	0.0897719	0.952847	0
ABCC8	ENSG00000006071	protein_coding	0	0	-0.601075	0.594036	0	0	-0.899786	0.382843	0	0	-0.946642	0.403064	0
CACNG3	ENSG00000006116	protein_coding	0	0	NA	NA	0	0	-2.25388	NA	0	0	NA	NA	0
TMEM132A	ENSG00000006118	protein_coding	0	0	-0.179519	0.627107	0	0	-0.398292	0.203708	0	0	-0.536144	0.154741	0
AP2B1	ENSG00000006125	protein_coding	1	0	0.434292	0.000480606	1	0	0.74375	5.57916e-12	1	0	0.607541	0.00960814	1
TAC1	ENSG00000006128	protein_coding	0	0	NA	NA	0	0	-2.16632	NA	0	0	NA	NA	0
ZNF263	ENSG00000006194	protein_coding	0	0	0.93424	0.000388978	1	0	0.332019	0.289513	0	0	1.02447	0.00562627	1
CX3CL1	ENSG00000006210	protein_coding	0	0	1.45006	NA	0	0	-2.33508	NA	0	0	-1.89443	NA	0
SPATA20	ENSG00000006282	protein_coding	0	0	-0.0158176	0.984907	0	0	-0.236101	0.723377	0	0	0.098016	0.925048	0
CACNA1G	ENSG00000006283	protein_coding	0	0	-0.492389	0.678507	0	0	-0.0560795	0.971719	0	0	-0.460029	0.760307	0
TNFRSF12A	ENSG00000006327	protein_coding	0	0	-0.135801	0.927175	0	0	-0.991417	0.29937	0	0	-0.00167618	0.999488	0
DLX6	ENSG00000006377	protein_coding	0	0	-0.068537	0.953539	0	0	0.537754	0.621404	0	0	-0.120191	0.930117	0
MAP3K9	ENSG00000006432	protein_coding	0	0	-0.0953781	0.872146	0	0	-0.302737	0.512582	0	0	-0.513895	0.287236	0
RALA	ENSG00000006451	protein_coding	0	0	0.282391	0.28399	0	0	0.454397	0.0842647	0	0	0.682199	0.0418292	1
BAIAP2L1	ENSG00000006453	protein_coding	0	0	0.164678	0.736113	0	0	0.196081	0.684575	0	0	0.284851	0.638608	0
KDM7A	ENSG00000006459	protein_coding	0	0	-0.28694	0.266201	0	0	1.01672	0.000150369	1	0	0.845168	0.011793	1
ETV1	ENSG00000006468	protein_coding	0	0	-0.174049	NA	0	0	-0.562836	0.692895	0	0	0.143164	0.947171	0
AGK	ENSG00000006530	protein_coding	0	0	-0.224448	0.588592	0	0	0.145412	0.755723	0	0	0.156873	0.799395	0
ALDH3B1	ENSG00000006534	protein_coding	0	0	-0.124133	NA	0	0	-0.91017	0.431991	0	0	-0.525123	0.746917	0
TTC22	ENSG00000006555	protein_coding	0	0	-0.643078	NA	0	0	-1.28515	NA	0	0	0.415881	NA	0
PHTF2	ENSG00000006576	protein_coding	1	0	0.532758	0.0103832	1	0	1.04519	9.88039e-06	1	0	1.11729	0.000345166	1
CCL26	ENSG00000006606	protein_coding	0	0	NA	NA	0	0	NA	NA	0	0	NA	NA	0
FARP2	ENSG00000006607	protein_coding	0	0	0.300937	0.136872	0	0	0.471627	0.0221043	1	0	0.263195	0.454945	0
USH1C	ENSG00000006611	protein_coding	0	0	0.315632	0.681857	0	0	0.158354	0.848644	0	0	-0.198451	0.833635	0
GGCT	ENSG00000006625	protein_coding	0	0	0.687366	0.245898	0	0	0.36224	0.492379	0	0	0.569369	0.369665	0
DBF4	ENSG00000006634	protein_coding	1	0	0.499201	0.0158356	1	0	0.88826	5.81479e-05	1	0	1.1495	7.95804e-05	1
TBXA2R	ENSG00000006638	protein_coding	0	0	0.651549	NA	0	0	1.07823	NA	0	0	0.753635	0.640519	0
IFRD1	ENSG00000006652	protein_coding	0	0	0.235641	0.368003	0	0	0.903985	4.57975e-05	1	0	0.930041	0.00113285	1
LGALS14	ENSG00000006659	protein_coding	0	0	NA	NA	0	0	NA	NA	0	0	-2.13227	NA	0
COX10	ENSG00000006695	protein_coding	0	0	0.229241	0.619207	0	0	0.143419	0.758602	0	0	0.10234	0.873257	0
GTF2IRD1	ENSG00000006704	protein_coding	0	0	-0.089877	0.861631	0	0	0.0836446	0.875942	0	0	-0.0251144	0.972594	0
PAF1	ENSG00000006712	protein_coding	0	0	0.045462	0.905066	0	0	0.0646539	0.828474	0	0	0.461934	0.208908	0
VPS41	ENSG00000006715	protein_coding	0	0	0.150494	0.531698	0	0	0.805239	0.000163987	1	0	0.96232	0.000456935	1
ARHGAP44	ENSG00000006740	protein_coding	0	0	0.063825	0.917678	0	0	-0.143702	0.782699	0	0	-0.188807	0.777085	0
ELAC2	ENSG00000006744	protein_coding	0	0	0.244622	0.201656	0	0	0.189129	0.283244	0	0	0.428486	0.12636	0
SCIN	ENSG00000006747	protein_coding	0	0	0.312102	NA	0	0	3.01072	NA	0	0	-1.80536	NA	0
ARSD	ENSG00000006756	protein_coding	0	0	-0.425295	NA	0	0	1.72167	NA	0	0	-2.94462	NA	0
PNPLA4	ENSG00000006757	protein_coding	0	0	0.633676	NA	0	0	2.40478	NA	0	0	0.586374	NA	0
MYH13	ENSG00000006788	protein_coding	0	0	0.485005	NA	0	0	0.71582	NA	0	0	-1.45691	NA	0
ADIPOR2	ENSG00000006831	protein_coding	0	0	0.366422	0.025206	1	0	0.726077	1.603e-05	1	0	0.558863	0.0570712	0
CDKL3	ENSG00000006837	protein_coding	0	0	-0.414342	NA	0	0	0.633797	NA	0	0	-1.59286	NA	0
UPP2	ENSG00000007001	protein_coding	0	0	-2.98543	NA	0	0	NA	NA	0	0	NA	NA	0
PRSS21	ENSG00000007038	protein_coding	0	0	-1.71461	NA	0	0	NA	NA	0	0	-1.99497	NA	0
MARK4	ENSG00000007047	protein_coding	0	0	0.0847476	0.874204	0	0	0.0971108	0.814971	0	0	-0.0194991	0.9746	0
PROM1	ENSG00000007062	protein_coding	0	0	1.45006	NA	0	0	1.6943	NA	0	0	1.85211	NA	0
CCDC124	ENSG00000007080	protein_coding	0	1	-0.754695	0.0210478	0	1	-1.91735	4.32496e-15	0	1	-1.25708	0.00506783	0
CEACAM21	ENSG00000007129	protein_coding	0	0	NA	NA	0	0	NA	NA	0	0	NA	NA	0
PAFAH1B1	ENSG00000007168	protein_coding	1	0	0.696622	2.83201e-09	1	0	1.28167	6.29884e-25	1	0	1.29833	9.21069e-10	1
NOS2	ENSG00000007171	protein_coding	0	0	0.047369	0.972002	0	0	-0.414193	0.687326	0	0	-0.127563	0.933258	0
DNAH9	ENSG00000007174	protein_coding	0	0	-0.291436	NA	0	0	-0.688704	NA	0	0	-0.637161	NA	0
KIAA0100	ENSG00000007202	protein_coding	0	0	0.182197	0.384278	0	0	0.216734	0.210625	0	0	0.340393	0.209267	0
SLC13A2	ENSG00000007216	protein_coding	0	0	NA	NA	0	0	NA	NA	0	0	NA	NA	0
GAS7	ENSG00000007237	protein_coding	0	0	0.507511	0.39197	0	0	0.438559	0.507841	0	0	0.340704	0.680588	0
TRAPPC6A	ENSG00000007255	protein_coding	0	0	-0.167733	0.874421	0	0	-0.904875	0.229059	0	0	-0.791004	0.441883	0
MATK	ENSG00000007264	protein_coding	0	0	-0.363032	0.367891	0	0	-0.364739	0.427322	0	0	-0.381661	0.522861	0
CEACAM7	ENSG00000007306	protein_coding	0	0	NA	NA	0	0	NA	NA	0	0	NA	NA	0
CD79B	ENSG00000007312	protein_coding	0	0	0.485005	NA	0	0	-2.70266	NA	0	0	0.876362	NA	0
SCN4A	ENSG00000007314	protein_coding	0	0	-0.985003	0.349087	0	0	-0.33998	NA	0	0	-0.608227	0.723133	0
ST7L	ENSG00000007341	protein_coding	0	0	-0.301895	0.565632	0	0	-0.536348	0.274689	0	0	-0.495558	0.41976	0
TKTL1	ENSG00000007350	protein_coding	0	0	0.425331	NA	0	0	0.397777	NA	0	0	0.600305	NA	0
PAX6	ENSG00000007372	protein_coding	0	0	-0.410322	0.181511	0	0	-0.038497	0.938524	0	0	0.238871	0.698119	0
RPUSD1	ENSG00000007376	protein_coding	0	0	0.094968	0.806093	0	0	-0.31173	0.279842	0	0	-0.131442	0.786241	0
RHBDF1	ENSG00000007384	protein_coding	0	0	-0.888666	0.282802	0	0	-1.55097	0.0314243	0	1	-1.53892	0.0576048	0
LUC7L	ENSG00000007392	protein_coding	0	0	-0.45138	0.20744	0	0	-0.147398	0.759937	0	0	-0.287033	0.618531	0
CACNA2D2	ENSG00000007402	protein_coding	0	0	0.253499	0.694601	0	0	-0.209255	0.717612	0	0	-0.0492791	0.956328	0
BAIAP3	ENSG00000007516	protein_coding	0	0	-0.401191	0.707265	0	0	-0.621918	0.54699	0	0	-1.17425	0.223449	0
TSR3	ENSG00000007520	protein_coding	0	0	-0.288322	0.56172	0	0	-1.01294	0.00574413	0	1	-0.384288	0.599013	0
PIGQ	ENSG00000007541	protein_coding	0	0	-0.356507	0.490859	0	0	-0.929578	0.0279638	0	1	-0.897416	0.0779544	0
CRAMP1	ENSG00000007545	protein_coding	0	0	0.00657921	0.992976	0	0	0.182381	0.740689	0	0	0.342593	0.603087	0
TEAD3	ENSG00000007866	protein_coding	0	0	-0.11399	0.893636	0	0	0.129813	0.875285	0	0	-0.360113	0.661787	0
SELE	ENSG00000007908	protein_coding	0	0	NA	NA	0	0	NA	NA	0	0	NA	NA	0
DNAJC11	ENSG00000007923	protein_coding	0	0	-0.258814	0.465073	0	0	-0.355561	0.270231	0	0	-0.151623	0.783689	0
FMO3	ENSG00000007933	protein_coding	0	0	-0.117283	NA	0	0	1.12615	NA	0	0	-1.39842	NA	0
MYLIP	ENSG00000007944	protein_coding	0	0	0.0795891	0.911444	0	0	0.341395	0.566657	0	0	0.62574	0.357449	0
NOX1	ENSG00000007952	protein_coding	0	0	0.278918	NA	0	0	-0.0695643	NA	0	0	-0.758797	0.655517	0
E2F2	ENSG00000007968	protein_coding	0	0	NA	NA	0	0	NA	NA	0	0	NA	NA	0
PSMB1	ENSG00000008018	protein_coding	0	0	-0.0580725	0.855301	0	0	-0.30095	0.143971	0	0	0.0369039	0.937969	0
SYN1	ENSG00000008056	protein_coding	0	0	0.137503	NA	0	0	-0.858496	NA	0	0	-1.10308	NA	0
JARID2	ENSG00000008083	protein_coding	0	0	-0.536591	0.00860258	0	1	0.194411	0.567301	0	0	0.22871	0.624219	0
CDKL5	ENSG00000008086	protein_coding	0	0	-0.297331	0.604968	0	0	0.528913	0.392446	0	0	-0.0272275	0.976703	0
CAMK1G	ENSG00000008118	protein_coding	0	0	0.685724	NA	0	0	1.66649	NA	0	0	1.82071	NA	0
CDK11A	ENSG00000008128	protein_coding	0	0	-3.44124	NA	0	0	-4.26789	NA	0	0	-3.58324	NA	0
NADK	ENSG00000008130	protein_coding	0	0	-0.18479	0.607804	0	0	-0.21996	0.514987	0	0	0.175531	0.738492	0
TFAP2B	ENSG00000008196	protein_coding	0	0	NA	NA	0	0	NA	NA	0	0	NA	NA	0
TFAP2D	ENSG00000008197	protein_coding	0	0	NA	NA	0	0	NA	NA	0	0	NA	NA	0
DLEC1	ENSG00000008226	protein_coding	0	0	-0.988698	0.380055	0	0	-1.43285	0.186058	0	0	-1.09814	0.409132	0
CYTH3	ENSG00000008256	protein_coding	0	0	-0.327708	0.326339	0	0	0.497113	0.209748	0	0	0.519164	0.296215	0
ADAM22	ENSG00000008277	protein_coding	0	0	-0.0682277	0.8669	0	0	0.8131	0.0126931	1	0	0.671339	0.107564	0
SYPL1	ENSG00000008282	protein_coding	0	0	0.41373	0.0736126	0	0	0.960187	0.000105606	1	0	0.970167	0.00201076	1
CYB561	ENSG00000008283	protein_coding	0	0	0.502311	0.45571	0	0	-0.195407	0.781961	0	0	-0.432439	0.560157	0
SPAG9	ENSG00000008294	protein_coding	0	0	0.188279	0.185769	0	0	0.799876	3.7216e-13	1	0	0.805167	5.75447e-05	1
CELSR3	ENSG00000008300	protein_coding	0	1	-0.893576	0.000745207	0	1	-1.03852	0.000567575	0	1	-0.965993	0.0105991	0
AASS	ENSG00000008311	protein_coding	0	0	-0.25574	0.407371	0	0	0.867748	0.0107259	1	0	0.784848	0.0658033	0
PLEKHG6	ENSG00000008323	protein_coding	0	0	-1.17508	NA	0	0	-2.1794	NA	0	0	-2.33953	NA	0
SS18L2	ENSG00000008324	protein_coding	0	0	0.689064	0.12895	0	0	0.338273	0.536683	0	0	0.616017	0.318466	0
MPND	ENSG00000008382	protein_coding	0	0	-0.468735	0.605632	0	0	-0.886099	0.285301	0	0	-0.448207	0.724159	0
MGST1	ENSG00000008394	protein_coding	0	0	-0.155477	0.903832	0	0	0.238989	0.843985	0	0	0.328028	0.822558	0
CRY1	ENSG00000008405	protein_coding	0	0	0.399871	0.135118	0	0	0.78987	0.00573359	1	0	0.920848	0.00726675	1
PGLYRP1	ENSG00000008438	protein_coding	0	0	-1.57511	NA	0	0	1.6943	NA	0	0	-1.1433	NA	0
NFIX	ENSG00000008441	protein_coding	0	0	0.0195864	0.969207	0	0	-0.168646	0.653608	0	0	-0.137481	0.795785	0
ST3GAL1	ENSG00000008513	protein_coding	0	0	0.218364	0.673382	0	0	0.19685	0.708468	0	0	0.105631	0.882351	0
MMP25	ENSG00000008516	protein_coding	0	0	-1.1358	NA	0	0	-1.15253	NA	0	0	-1.01085	NA	0
IL32	ENSG00000008517	protein_coding	0	0	0.866895	NA	0	0	1.52228	NA	0	0	3.15517	NA	0
PKD1	ENSG00000008710	protein_coding	0	1	-0.614237	0.0103601	0	1	-0.658216	0.0110907	0	1	-0.738128	0.0306357	0
MAPK8IP2	ENSG00000008735	protein_coding	0	0	-0.201804	0.614186	0	0	-0.871847	0.00174318	0	1	-0.773625	0.0345977	0
MED24	ENSG00000008838	protein_coding	0	0	0.183304	0.480397	0	0	-0.539123	0.00386198	0	1	-0.42624	0.157343	0
RHOBTB2	ENSG00000008853	protein_coding	0	0	0.161156	0.842764	0	0	0.0132001	0.989364	0	0	0.408379	0.670694	0
HEATR5B	ENSG00000008869	protein_coding	0	0	0.0376803	0.894214	0	0	0.762272	3.57076e-05	1	0	0.581304	0.0354344	1
SEC62	ENSG00000008952	protein_coding	1	0	0.411845	0.0111937	1	0	0.827169	7.26083e-08	1	0	0.861829	0.000267792	1
RPS20	ENSG00000008988	protein_coding	0	0	-0.16505	0.51664	0	0	-0.918329	4.47411e-17	0	1	-0.487898	0.0702109	0
CSDE1	ENSG00000009307	protein_coding	0	0	0.221078	0.0587021	0	0	0.833138	5.13405e-45	1	0	0.886804	2.63523e-07	1
UBE3C	ENSG00000009335	protein_coding	1	0	0.523686	2.55933e-05	1	0	0.804981	5.3498e-14	1	0	0.820052	9.58806e-05	1
REV3L	ENSG00000009413	protein_coding	0	0	-0.214375	0.272865	0	0	0.404747	0.0309322	1	0	0.31995	0.311633	0
TENM1	ENSG00000009694	protein_coding	0	0	-0.470651	0.276628	0	0	-0.00952668	0.989729	0	0	0.552866	0.412374	0
PAX7	ENSG00000009709	protein_coding	0	0	-0.157124	NA	0	0	-0.520087	NA	0	0	-0.337278	NA	0
MASP2	ENSG00000009724	protein_coding	0	0	-0.425519	0.690096	0	0	-0.119551	0.925397	0	0	-0.712742	0.523413	0
IYD	ENSG00000009765	protein_coding	0	0	NA	NA	0	0	-3.11498	NA	0	0	NA	NA	0
FAM76A	ENSG00000009780	protein_coding	0	0	0.459122	0.184058	0	0	0.867853	0.0186812	1	0	0.714368	0.121972	0
TRAF3IP3	ENSG00000009790	protein_coding	0	0	-0.381479	NA	0	0	0.835896	NA	0	0	-0.392543	NA	0
POMT2	ENSG00000009830	protein_coding	0	0	-0.410198	0.267216	0	0	-0.839386	0.0103105	0	1	-0.642276	0.148011	0
VTA1	ENSG00000009844	protein_coding	1	0	0.582718	0.000552234	1	0	0.773005	5.99518e-06	1	0	1.23197	3.95233e-07	1
MLXIPL	ENSG00000009950	protein_coding	0	0	-1.44151	0.0635207	0	0	-1.98789	0.007052	0	1	-2.10567	0.00754585	0
BAZ1B	ENSG00000009954	protein_coding	0	0	0.185711	0.195047	0	0	0.636375	1.16449e-09	1	0	0.831128	4.9569e-05	1
RANBP9	ENSG00000010017	protein_coding	0	0	-0.0779836	0.848174	0	0	0.169252	0.640453	0	0	0.257919	0.57558	0
ETV7	ENSG00000010030	protein_coding	0	0	0.485005	NA	0	0	0.71582	NA	0	0	0.876362	NA	0
SPRTN	ENSG00000010072	protein_coding	1	0	0.525282	0.00261328	1	0	0.977534	1.05752e-07	1	0	0.83179	0.00460316	1
METTL13	ENSG00000010165	protein_coding	0	0	0.33438	0.283505	0	0	-0.153887	0.632146	0	0	0.185362	0.722165	0
DYRK4	ENSG00000010219	protein_coding	0	0	-0.559152	0.470437	0	0	-0.451052	0.633837	0	0	-0.114127	0.936195	0
ZNF207	ENSG00000010244	protein_coding	0	0	0.212071	0.22929	0	0	0.473403	0.00167279	1	0	0.422008	0.146157	0
UQCRC1	ENSG00000010256	protein_coding	0	1	-0.487039	0.0054062	0	1	-0.821979	6.73078e-07	0	1	-0.30802	0.448499	0
STARD3NL	ENSG00000010270	protein_coding	0	0	0.240835	0.442747	0	0	0.850769	0.00645517	1	0	0.910459	0.0139249	1
CD9	ENSG00000010278	protein_coding	0	0	0.116104	0.808986	0	0	0.266687	0.552167	0	0	0.544261	0.282938	0
HHATL	ENSG00000010282	protein_coding	0	0	1.01261	NA	0	0	-0.734287	NA	0	0	-1.72047	NA	0
NCAPD2	ENSG00000010292	protein_coding	0	0	-0.11892	0.53963	0	0	0.154535	0.308811	0	0	0.361267	0.140922	0
IFFO1	ENSG00000010295	protein_coding	0	0	-0.600704	0.22474	0	0	-0.913387	0.0689944	0	0	-1.13471	0.0350884	0
GIPR	ENSG00000010310	protein_coding	0	0	-0.646694	NA	0	0	-1.18977	NA	0	0	-1.48611	0.376142	0
PHF7	ENSG00000010318	protein_coding	0	0	-0.0451356	0.956926	0	0	0.873796	0.214882	0	0	-0.164965	0.851898	0
SEMA3G	ENSG00000010319	protein_coding	0	0	-0.513935	0.559968	0	0	-0.432298	0.659835	0	0	-0.448951	0.701824	0
NISCH	ENSG00000010322	protein_coding	0	1	-0.554678	0.00403989	0	1	-0.704524	0.00106132	0	1	-0.604707	0.0462592	0
STAB1	ENSG00000010327	protein_coding	0	0	-0.180656	0.895296	0	0	-1.27966	0.119246	0	0	-1.66085	0.0403008	0
FUZ	ENSG00000010361	protein_coding	0	0	0.155029	0.833479	0	0	-0.61309	0.248862	0	0	-0.372771	0.603969	0
SLC6A13	ENSG00000010379	protein_coding	0	0	-1.43695	NA	0	0	-1.83848	NA	0	0	-2.20988	NA	0
IDS	ENSG00000010404	protein_coding	0	0	0.145835	0.727335	0	0	0.465305	0.146094	0	0	-0.0292742	0.964203	0
PRSS3	ENSG00000010438	protein_coding	0	0	-0.974086	NA	0	0	-1.37988	NA	0	0	0.297597	NA	0
ZNF200	ENSG00000010539	protein_coding	0	0	0.604828	0.207024	0	0	0.830968	0.0732311	0	0	0.73976	0.197848	0
CD4	ENSG00000010610	protein_coding	0	0	-1.44079	NA	0	0	-1.50335	NA	0	0	-1.94724	0.180399	0
LRRC23	ENSG00000010626	protein_coding	0	0	-1.27006	NA	0	0	-1.33514	NA	0	0	-1.4983	NA	0
BTK	ENSG00000010671	protein_coding	0	0	-0.171864	NA	0	0	-0.927124	NA	0	0	0.1458	NA	0
HFE	ENSG00000010704	protein_coding	0	0	NA	NA	0	0	-3.75309	NA	0	0	-3.03822	NA	0
SCMH1	ENSG00000010803	protein_coding	0	0	-0.139908	0.777343	0	0	-0.336545	0.382066	0	0	-0.474077	0.295325	0
FYN	ENSG00000010810	protein_coding	0	0	0.251134	0.278012	0	0	0.34107	0.114768	0	0	0.646778	0.0239756	1
HIVEP2	ENSG00000010818	protein_coding	0	0	0.309454	0.230226	0	0	0.919558	0.000589385	1	0	1.15144	0.000489659	1
FMO1	ENSG00000010932	protein_coding	0	0	-1.07358	NA	0	0	-0.704633	NA	0	0	-0.529794	NA	0
TCEB3	ENSG00000011007	protein_coding	1	0	0.396005	0.0272387	1	0	0.484954	0.0104105	1	0	0.976069	0.000281723	1
LYPLA2	ENSG00000011009	protein_coding	0	0	-0.461605	0.302253	0	0	-0.687631	0.147184	0	0	-0.835773	0.10507	0
CLCN6	ENSG00000011021	protein_coding	0	0	-0.97243	0.0880503	0	0	-0.775041	0.294633	0	0	-1.25092	0.0734738	0
MRC2	ENSG00000011028	protein_coding	0	0	-0.378047	0.383339	0	0	-1.10191	0.00169024	0	1	-0.525582	0.372481	0
NME1-NME2	ENSG00000011052	protein_coding	0	0	NA	NA	0	0	NA	NA	0	0	NA	NA	0
SLC6A7	ENSG00000011083	protein_coding	0	0	NA	NA	0	0	NA	NA	0	0	NA	NA	0
TSPAN9	ENSG00000011105	protein_coding	0	0	0.341179	0.502527	0	0	-0.151185	0.780949	0	0	0.170299	0.815626	0
BTBD7	ENSG00000011114	protein_coding	0	0	1.44034	NA	0	0	1.31311	NA	0	0	-0.0930173	0.960334	0
APBA3	ENSG00000011132	protein_coding	0	0	-0.529113	0.43709	0	0	-0.0418958	0.968943	0	0	0.0547518	0.968555	0
MKS1	ENSG00000011143	protein_coding	0	0	-0.550442	0.188573	0	0	-0.178535	0.769445	0	0	-0.266251	0.71642	0
ABHD5	ENSG00000011198	protein_coding	0	0	0.0437819	0.952094	0	0	0.227997	0.714105	0	0	0.35214	0.644252	0
ANOS1	ENSG00000011201	protein_coding	0	0	-2.42575	NA	0	0	NA	NA	0	0	NA	NA	0
AKAP8L	ENSG00000011243	protein_coding	0	0	-0.101389	0.852894	0	0	-0.682494	0.0649967	0	0	-0.230473	0.714351	0
MBTD1	ENSG00000011258	protein_coding	0	0	0.263399	0.294344	0	0	0.782331	0.00179192	1	0	0.664384	0.048109	1
UTP18	ENSG00000011260	protein_coding	0	0	0.217196	0.341487	0	0	0.381567	0.0646172	0	0	0.504389	0.0859253	0
RNF216	ENSG00000011275	protein_coding	0	0	0.170557	0.530991	0	0	0.586841	0.00809519	1	0	0.60579	0.0474981	1
TTC19	ENSG00000011295	protein_coding	0	0	0.12402	0.634305	0	0	0.561444	0.00467639	1	0	0.512183	0.0901039	0
PTBP1	ENSG00000011304	protein_coding	0	0	0.125701	0.39382	0	0	-0.21087	0.0257147	0	0	-0.260854	0.276224	0
DPF1	ENSG00000011332	protein_coding	0	0	-0.488195	0.475277	0	0	0.0657508	0.946431	0	0	0.148803	0.894405	0
SYT7	ENSG00000011347	protein_coding	0	0	0.204133	0.80895	0	0	-0.349679	0.630738	0	0	-0.319468	0.730471	0
LARS2	ENSG00000011376	protein_coding	0	0	0.0227886	0.958155	0	0	0.39168	0.0759312	0	0	0.56761	0.0589212	0
PIK3C2A	ENSG00000011405	protein_coding	0	0	0.288785	0.0770785	0	0	0.983326	4.20698e-10	1	0	0.854099	0.000292964	1
PLAUR	ENSG00000011422	protein_coding	0	0	-0.901444	0.388097	0	0	-0.654705	0.632058	0	0	-0.832069	0.565669	0
ANLN	ENSG00000011426	protein_coding	0	0	0.148794	0.441803	0	0	0.835606	9.68991e-09	1	0	0.827392	0.000323045	1
WIZ	ENSG00000011451	protein_coding	0	0	0.00849674	0.984673	0	0	-0.529147	0.0299513	0	1	-0.454991	0.174209	0
RABGAP1	ENSG00000011454	protein_coding	0	0	-0.136185	0.659222	0	0	0.758906	0.00469176	1	0	0.671689	0.0547827	0
DCN	ENSG00000011465	protein_coding	0	0	NA	NA	0	0	NA	NA	0	0	NA	NA	0
QPCTL	ENSG00000011478	protein_coding	0	0	-0.423476	0.376865	0	0	-0.415769	0.434128	0	0	-0.751746	0.160135	0
PPP5C	ENSG00000011485	protein_coding	0	0	0.322515	0.130213	0	0	0.344577	0.0928598	0	0	0.553731	0.0699896	0
CEP68	ENSG00000011523	protein_coding	0	0	0.122535	0.781922	0	0	0.155499	0.716001	0	0	0.190517	0.7277	0
MAP4K3	ENSG00000011566	protein_coding	0	0	0.204258	0.5288	0	0	1.31073	1.92726e-06	1	0	1.34249	5.59459e-05	1
ZBTB32	ENSG00000011590	protein_coding	0	0	-1.09563	NA	0	0	-1.24927	NA	0	0	-2.19168	NA	0
TYROBP	ENSG00000011600	protein_coding	0	0	NA	NA	0	0	-2.25388	NA	0	0	NA	NA	0
TMEM159	ENSG00000011638	protein_coding	0	0	-0.0238582	0.978758	0	0	-0.0820784	0.920126	0	0	0.065196	0.952847	0
GABRA3	ENSG00000011677	protein_coding	0	0	NA	NA	0	0	NA	NA	0	0	NA	NA	0
BRCA1	ENSG00000012048	protein_coding	0	0	0.040086	0.874489	0	0	0.629933	1.26485e-05	1	0	0.873098	8.11633e-05	1
ERCC1	ENSG00000012061	protein_coding	0	0	-0.0211799	0.977927	0	0	-0.322674	0.539956	0	0	-0.321114	0.625122	0
CD22	ENSG00000012124	protein_coding	0	0	-1.71461	NA	0	0	-3.11498	NA	0	0	NA	NA	0
SEMA3B	ENSG00000012171	protein_coding	0	0	-1.02696	0.270307	0	0	-1.0017	0.377332	0	0	-1.58078	0.112635	0
MBTPS2	ENSG00000012174	protein_coding	0	0	0.278029	0.238349	0	0	0.979741	2.49994e-05	1	0	0.143845	0.801553	0
PRICKLE3	ENSG00000012211	protein_coding	0	0	-0.602918	0.343214	0	0	-0.320874	0.703801	0	0	-0.483469	0.597304	0
LTF	ENSG00000012223	protein_coding	0	0	NA	NA	0	0	NA	NA	0	0	NA	NA	0
EXTL3	ENSG00000012232	protein_coding	0	0	0.28784	0.22908	0	0	0.200371	0.455849	0	0	0.278298	0.443578	0
NR1H4	ENSG00000012504	protein_coding	0	0	NA	NA	0	0	NA	NA	0	0	NA	NA	0
ELOVL5	ENSG00000012660	protein_coding	0	0	0.104864	0.646904	0	0	0.792975	7.57441e-07	1	0	0.59169	0.0193453	1
ALOX5	ENSG00000012779	protein_coding	0	0	-1.71461	NA	0	0	NA	NA	0	0	NA	NA	0
KDM5D	ENSG00000012817	protein_coding	0	0	NA	NA	0	0	NA	NA	0	0	NA	NA	0
CALCOCO1	ENSG00000012822	protein_coding	0	0	-0.584243	0.112641	0	0	-0.580663	0.191417	0	0	-0.54516	0.322347	0
UBR7	ENSG00000012963	protein_coding	0	0	1.92293	NA	0	0	0.936954	NA	0	0	1.08311	NA	0
MAP4K5	ENSG00000012983	protein_coding	0	0	-0.0799169	0.828581	0	0	0.497431	0.0713538	0	0	0.44538	0.238748	0
EHD3	ENSG00000013016	protein_coding	0	0	0.0745613	0.915698	0	0	-0.101433	0.863909	0	0	0.355592	0.603087	0
PSMC4	ENSG00000013275	protein_coding	0	0	-0.417682	NA	0	0	-1.56877	0.165385	0	0	-2.18495	0.0434044	0
MAN2B2	ENSG00000013288	protein_coding	0	0	-0.016238	0.981464	0	0	-0.276968	0.594215	0	0	-0.0885253	0.910686	0
SLC7A14	ENSG00000013293	protein_coding	0	0	-2.45319	NA	0	0	-3.26737	NA	0	0	-3.58324	NA	0
CLDN11	ENSG00000013297	protein_coding	0	0	-0.670869	NA	0	0	1.21405	NA	0	0	-1.47972	NA	0
SLC25A39	ENSG00000013306	protein_coding	0	0	-0.188227	0.447899	0	0	-0.734969	5.67048e-05	0	1	-0.551958	0.0570766	0
MVP	ENSG00000013364	protein_coding	0	0	-0.662464	0.364036	0	0	-1.06959	0.102234	0	0	-1.12481	0.147678	0
NUB1	ENSG00000013374	protein_coding	0	0	-0.0710874	0.824803	0	0	0.124598	0.670227	0	0	0.401833	0.266046	0
PGM3	ENSG00000013375	protein_coding	1	0	0.659777	0.00049348	1	0	1.02482	1.53464e-06	1	0	0.884011	0.00257501	1
RWDD2A	ENSG00000013392	protein_coding	0	0	0.329976	0.662657	0	0	0.486611	0.525299	0	0	0.51683	0.566694	0
CLK1	ENSG00000013441	protein_coding	0	0	-0.0149379	0.9806	0	0	0.456054	0.306686	0	0	0.62843	0.230328	0
POLR3B	ENSG00000013503	protein_coding	1	0	0.485855	0.0102922	1	0	1.13842	1.08303e-07	1	0	1.0507	0.000327701	1
ANGEL1	ENSG00000013523	protein_coding	0	0	0.22956	0.363301	0	0	0.271701	0.293391	0	0	-0.129878	0.790934	0
RNF14	ENSG00000013561	protein_coding	0	0	0.338679	0.194438	0	0	0.965005	0.000343818	1	0	0.887689	0.00823224	1
DNASE1L1	ENSG00000013563	protein_coding	0	0	-0.411757	0.609871	0	0	-0.568282	0.473945	0	0	-0.921767	0.224419	0
DDX11	ENSG00000013573	protein_coding	0	1	-0.599009	0.0130817	0	1	-0.966311	7.17261e-05	0	1	-0.716504	0.036826	0
HEBP1	ENSG00000013583	protein_coding	0	0	-0.0757839	0.919463	0	0	-0.392267	0.475562	0	0	-0.440798	0.519965	0
GPRC5A	ENSG00000013588	protein_coding	0	0	0.01492	0.993098	0	0	-0.895572	0.355597	0	0	-0.915912	0.4055	0
MAMLD1	ENSG00000013619	protein_coding	0	0	-0.0948976	0.921564	0	0	-0.271003	0.727579	0	0	0.016853	0.988735	0
CD6	ENSG00000013725	protein_coding	0	0	NA	NA	0	0	-4.15539	NA	0	0	-3.03822	NA	0
TACC3	ENSG00000013810	protein_coding	0	0	0.0166875	0.96137	0	0	-0.385989	0.047594	0	1	-0.0206811	0.970228	0
UFL1	ENSG00000014123	protein_coding	0	0	0.127984	0.686479	0	0	0.877078	0.00104769	1	0	1.06839	0.00111364	1
POLA2	ENSG00000014138	protein_coding	0	0	-0.0485231	0.89135	0	0	-0.348813	0.128691	0	0	-0.193752	0.619073	0
ZC3H3	ENSG00000014164	protein_coding	0	0	0.321565	0.701204	0	0	-0.466072	0.422022	0	0	-0.711888	0.239772	0
CAPN1	ENSG00000014216	protein_coding	0	0	0.042931	0.921032	0	0	-0.275893	0.289417	0	0	0.00299986	0.995895	0
ACPP	ENSG00000014257	protein_coding	0	0	-0.528085	NA	0	0	0.0399134	NA	0	0	0.710074	NA	0
MDH1	ENSG00000014641	protein_coding	0	0	0.206067	0.339005	0	0	0.167224	0.435022	0	0	0.738638	0.00532321	1
SLC30A9	ENSG00000014824	protein_coding	0	0	0.206382	0.21215	0	0	0.990025	3.5901e-12	1	0	1.15675	1.04131e-07	1
MTMR11	ENSG00000014914	protein_coding	0	0	-0.730428	0.515715	0	0	-0.907309	0.436466	0	0	-1.80925	0.0468611	0
COX15	ENSG00000014919	protein_coding	0	0	0.316672	0.0528012	0	0	0.7892	1.42338e-06	1	0	0.778214	0.00320672	1
CCDC88C	ENSG00000015133	protein_coding	0	0	-0.207929	0.698239	0	0	-0.696354	0.0853033	0	0	-0.375766	0.557943	0
YAF2	ENSG00000015153	protein_coding	0	0	-0.128675	0.80056	0	0	0.583802	0.229059	0	0	0.233181	0.758007	0
ZMYND11	ENSG00000015171	protein_coding	0	0	0.500701	0.0440549	1	0	0.547839	0.0514501	0	0	1.09402	0.0010116	1
WAS	ENSG00000015285	protein_coding	0	0	-2.14086	NA	0	0	-3.04335	NA	0	0	-3.55559	NA	0
DPEP1	ENSG00000015413	protein_coding	0	0	-0.550811	NA	0	0	-1.84362	NA	0	0	-2.16365	NA	0
BID	ENSG00000015475	protein_coding	0	0	-0.742082	0.135009	0	0	-1.10558	0.0230018	0	1	-0.84662	0.207929	0
MATR3.2	ENSG00000015479	protein_coding	0	0	-0.700586	0.268145	0	0	-0.615606	0.433579	0	0	-1.68463	0.0067233	0
NPC1L1	ENSG00000015520	protein_coding	0	0	0.373093	NA	0	0	-0.849042	NA	0	0	-1.58782	0.206519	0
XYLT2	ENSG00000015532	protein_coding	0	0	-0.76184	0.0151367	0	1	-0.429306	0.349854	0	0	-0.374438	0.539172	0
RGPD5	ENSG00000015568	protein_coding	0	0	-0.0706382	0.929728	0	0	2.59272	0.000433804	1	0	2.27944	0.00264144	1
STMN4	ENSG00000015592	protein_coding	0	0	1.32749	NA	0	0	-2.25264	NA	0	0	-1.54974	NA	0
NUDCD3	ENSG00000015676	protein_coding	0	0	0.49901	0.00832743	1	0	0.620569	0.00118905	1	0	0.538254	0.0659959	0
ISL1	ENSG00000016082	protein_coding	0	0	0.268676	0.615493	0	0	1.15361	0.0272137	1	0	0.780351	0.204707	0
CHDH	ENSG00000016391	protein_coding	0	0	0.302592	0.35298	0	0	0.143941	0.710048	0	0	0.361556	0.425888	0
IL20RA	ENSG00000016402	protein_coding	0	0	NA	NA	0	0	NA	NA	0	0	NA	NA	0
CLCA1	ENSG00000016490	protein_coding	0	0	NA	NA	0	0	NA	NA	0	0	NA	NA	0
CLCA4	ENSG00000016602	protein_coding	0	0	NA	NA	0	0	NA	NA	0	0	NA	NA	0
GLT8D1	ENSG00000016864	protein_coding	0	0	0.236699	0.487981	0	0	0.537033	0.140871	0	0	0.391149	0.375095	0
ATP2C1	ENSG00000017260	protein_coding	0	0	-0.0378467	0.90125	0	0	0.797433	0.000257239	1	0	0.754357	0.00724324	1
IGF1	ENSG00000017427	protein_coding	0	0	NA	NA	0	0	NA	NA	0	0	NA	NA	0
SLC38A5	ENSG00000017483	protein_coding	0	0	0.0622503	NA	0	0	2.68045	NA	0	0	0.493841	NA	0
RALBP1	ENSG00000017797	protein_coding	0	0	0.0803782	0.800375	0	0	0.280584	0.261991	0	0	0.459061	0.17558	0
RUFY3	ENSG00000018189	protein_coding	0	0	-0.181807	0.626961	0	0	-0.190753	0.611431	0	0	-0.0198679	0.975002	0
CNTN1	ENSG00000018236	protein_coding	0	0	-0.0693326	0.889409	0	0	1.05059	0.00688713	1	0	0.929507	0.042554	1
SLC11A1	ENSG00000018280	protein_coding	0	0	0.866895	NA	0	0	-1.45817	NA	0	0	0.1599	NA	0
WWTR1	ENSG00000018408	protein_coding	0	0	0.423519	0.172603	0	0	0.669779	0.0408648	1	0	0.949618	0.0156364	1
AGPS	ENSG00000018510	protein_coding	0	0	0.241459	0.169938	0	0	0.871309	7.45884e-09	1	0	1.03272	4.3958e-06	1
ZNF806	ENSG00000018607	unprocessed_pseudogene	0	0	NA	NA	0	0	NA	NA	0	0	NA	NA	0
CXorf56	ENSG00000018610	protein_coding	0	0	0.344672	0.0874375	0	0	0.722696	0.000194862	1	0	0.519529	0.108588	0
ATP1A2	ENSG00000018625	protein_coding	0	0	1.98822	NA	0	0	2.25093	NA	0	0	0.99874	NA	0
TTC27	ENSG00000018699	protein_coding	0	0	0.309091	0.266009	0	0	0.842611	0.00191086	1	0	0.746389	0.0358735	1
ZNF582	ENSG00000018869	protein_coding	0	0	0.425668	0.710839	0	0	0.96824	0.410349	0	0	1.61105	0.228997	0
VSIG2	ENSG00000019102	protein_coding	0	0	-1.13789	NA	0	0	-1.43924	NA	0	0	-1.18303	NA	0
PHLDB1	ENSG00000019144	protein_coding	0	0	-0.288589	0.499893	0	0	-0.583309	0.135052	0	0	-0.551926	0.255288	0
MARCO	ENSG00000019169	protein_coding	0	0	NA	NA	0	0	NA	NA	0	0	NA	NA	0
CYP24A1	ENSG00000019186	protein_coding	0	0	1.49452	NA	0	0	1.72167	NA	0	0	0.356698	NA	0
PRDM11	ENSG00000019485	protein_coding	0	0	0.528996	0.336397	0	0	0.155573	0.81357	0	0	0.660796	0.348991	0
SYT13	ENSG00000019505	protein_coding	0	0	-0.26804	NA	0	0	0.45983	NA	0	0	-0.675967	NA	0
SNAI2	ENSG00000019549	protein_coding	1	0	0.850327	0.00109528	1	0	0.612311	0.0242415	1	0	0.929851	0.00611519	1
CD74	ENSG00000019582	protein_coding	0	0	-0.588087	0.671156	0	0	-0.700782	0.599055	0	0	-1.73023	0.0803371	0
HGF	ENSG00000019991	protein_coding	0	0	0.686551	NA	0	0	1.66649	NA	0	0	1.82071	NA	0
ZRANB1	ENSG00000019995	protein_coding	0	0	0.172062	0.621788	0	0	0.944143	0.00295234	1	0	0.802953	0.0415538	1
NCDN	ENSG00000020129	protein_coding	0	0	0.336862	0.261494	0	0	-0.385643	0.16085	0	0	-0.329802	0.390446	0
ADGRA2	ENSG00000020181	protein_coding	0	0	-0.0952616	0.866123	0	0	-0.719708	0.0573387	0	0	-0.56091	0.277889	0
CCT8L1P	ENSG00000020219	processed_pseudogene	0	0	0.685724	NA	0	0	0.248633	NA	0	0	1.82071	NA	0
ZFP64	ENSG00000020256	protein_coding	0	0	0.200721	0.57163	0	0	-0.119333	0.743405	0	0	0.0550242	0.925187	0
MNAT1	ENSG00000020426	protein_coding	0	0	-0.0590053	0.916703	0	0	0.828997	0.0646172	0	0	0.533228	0.314715	0
SAMD4A	ENSG00000020577	protein_coding	0	0	0.175399	0.748393	0	0	0.320379	0.522098	0	0	0.414723	0.48338	0
RUNX3	ENSG00000020633	protein_coding	0	0	0.0371099	0.968309	0	0	-0.123522	0.876349	0	0	-0.322248	0.708323	0
MRE11	ENSG00000020922	protein_coding	0	0	0.0184321	0.956001	0	0	0.77633	0.00012062	1	0	0.570886	0.0683282	0
PLEKHB1	ENSG00000021300	protein_coding	0	0	-0.184033	0.847906	0	0	-0.989791	0.151669	0	0	-0.619625	0.517411	0
SERPINB1	ENSG00000021355	protein_coding	0	0	0.131173	0.870832	0	0	0.252226	0.752121	0	0	0.44326	0.623364	0
CYP3A43	ENSG00000021461	protein_coding	0	0	-2.60912	NA	0	0	-1.73503	NA	0	0	-2.52315	NA	0
SLC7A9	ENSG00000021488	protein_coding	0	0	-0.468793	NA	0	0	-1.71537	NA	0	0	-0.59391	NA	0
SPAST	ENSG00000021574	protein_coding	1	0	0.455544	0.0219189	1	0	1.30587	4.63619e-09	1	0	1.10695	0.000302214	1
NRXN3	ENSG00000021645	protein_coding	0	0	-0.518045	0.179345	0	0	-0.228382	0.622769	0	0	-0.553602	0.239686	0
OSBPL5	ENSG00000021762	protein_coding	0	0	-0.378877	0.589162	0	0	-0.550599	0.440872	0	0	-0.640797	0.413704	0
AQR	ENSG00000021776	protein_coding	0	0	0.244618	0.264372	0	0	0.50405	0.0110044	1	0	0.627984	0.0412851	1
CPS1	ENSG00000021826	protein_coding	0	0	-0.00626035	0.989677	0	0	0.724857	0.0143923	1	0	0.787	0.0392726	1
C8B	ENSG00000021852	protein_coding	0	0	NA	NA	0	0	NA	NA	0	0	NA	NA	0
FHL1	ENSG00000022267	protein_coding	0	0	0.397252	0.0138885	1	0	0.493721	0.000298056	1	0	0.303184	0.304482	0
RTFDC1	ENSG00000022277	protein_coding	0	0	0.058998	0.889583	0	0	0.0992485	0.792191	0	0	0.49649	0.243998	0
GABRA1	ENSG00000022355	protein_coding	0	0	NA	NA	0	0	NA	NA	0	0	NA	NA	0
NLRP2	ENSG00000022556	protein_coding	0	0	NA	NA	0	0	NA	NA	0	0	NA	NA	0
SLC45A4	ENSG00000022567	protein_coding	0	0	-0.228193	0.735009	0	0	0.197634	0.793989	0	0	-0.104099	0.92049	0
RNF10	ENSG00000022840	protein_coding	0	0	0.113441	0.641601	0	0	-0.217992	0.267735	0	0	0.0699402	0.859167	0
ZNF839	ENSG00000022976	protein_coding	0	0	0.0311728	0.972511	0	0	0.141825	0.858163	0	0	0.221672	0.814533	0
ZDHHC6	ENSG00000023041	protein_coding	1	0	0.540328	0.028276	1	0	0.513742	0.0485466	1	0	0.702533	0.035392	1
GRAMD1B	ENSG00000023171	protein_coding	0	0	-0.638797	0.219673	0	0	-0.0104452	0.991034	0	0	-0.642732	0.376791	0
RNH1	ENSG00000023191	protein_coding	0	0	1.12882	NA	0	0	-1.13345	0.312408	0	0	-0.440686	0.75117	0
NDUFS1	ENSG00000023228	protein_coding	0	0	0.121966	0.86355	0	0	0.827394	0.0953709	0	0	0.724919	0.217442	0
RB1CC1	ENSG00000023287	protein_coding	0	0	0.208189	0.212088	0	0	1.19544	9.97254e-16	1	0	1.42338	6.67695e-11	1
ERP44	ENSG00000023318	protein_coding	0	0	0.246916	0.39197	0	0	0.432115	0.137147	0	0	0.495328	0.209228	0
ALAS1	ENSG00000023330	protein_coding	0	0	0.207906	0.494872	0	0	0.184722	0.557246	0	0	0.415335	0.295216	0
BIRC3	ENSG00000023445	protein_coding	0	0	-2.05811	NA	0	0	-0.785138	NA	0	0	-2.27567	NA	0
AKAP11	ENSG00000023516	protein_coding	1	0	0.46029	0.00354619	1	0	1.19084	5.57019e-13	1	0	1.12434	2.30911e-06	1
GLRX2	ENSG00000023572	protein_coding	0	0	0.102618	0.905372	0	0	-0.08088	0.92157	0	0	0.485755	0.600271	0
SNAPC1	ENSG00000023608	protein_coding	0	0	-0.105213	0.892928	0	0	1.04668	0.139612	0	0	0.498032	0.564738	0
DERA	ENSG00000023697	protein_coding	0	0	0.0241606	0.970301	0	0	0.37397	0.429556	0	0	0.673036	0.207407	0
STRAP	ENSG00000023734	protein_coding	0	0	0.0297579	0.918934	0	0	0.54154	0.000301838	1	0	0.84773	0.000231688	1
ABCC2	ENSG00000023839	protein_coding	0	0	0.441415	NA	0	0	-0.49496	0.708909	0	0	-0.842847	0.550337	0
DEF6	ENSG00000023892	protein_coding	0	0	-0.269078	0.82491	0	0	-0.991173	0.304327	0	0	-0.55446	0.675476	0
PLEKHO1	ENSG00000023902	protein_coding	0	0	0.129103	0.825396	0	0	-0.183297	0.732229	0	0	0.126547	0.874674	0
GCLM	ENSG00000023909	protein_coding	0	0	0.00233741	0.996796	0	0	1.08928	0.0007776	1	0	0.892056	0.0259834	1
UBR2	ENSG00000024048	protein_coding	0	0	-0.00361881	0.992976	0	0	0.747801	0.00019554	1	0	0.958458	0.000365202	1
EHD2	ENSG00000024422	protein_coding	0	0	0.91729	0.317917	0	0	-0.327271	0.695524	0	0	0.0927869	0.941464	0
DEPDC1	ENSG00000024526	protein_coding	1	0	0.489822	0.00377556	1	0	1.5831	3.20663e-25	1	0	1.48457	1.18508e-10	1
CCDC28A	ENSG00000024862	protein_coding	0	0	-0.045114	0.942187	0	0	0.250858	0.644928	0	0	0.566562	0.354649	0
RRAGD	ENSG00000025039	protein_coding	0	0	0.0277624	0.952031	0	0	0.486381	0.143384	0	0	0.512729	0.234151	0
HSF2	ENSG00000025156	protein_coding	0	0	-0.153441	0.583969	0	0	1.03311	6.3154e-05	1	0	0.979241	0.00252153	1
PHF20	ENSG00000025293	protein_coding	0	0	-0.0624672	0.839624	0	0	0.97097	4.11301e-05	1	0	0.804157	0.0085698	1
HSD17B6	ENSG00000025423	protein_coding	0	0	0.110636	0.93922	0	0	-0.324099	0.794824	0	0	-0.114511	0.945249	0
NR1H3	ENSG00000025434	protein_coding	0	0	0.0869827	0.938589	0	0	-0.107714	0.916453	0	0	-0.3495	0.747891	0
TYMP	ENSG00000025708	protein_coding	0	0	-0.801447	0.46771	0	0	-0.727999	0.581537	0	0	-1.53804	0.150165	0
NCAPH2	ENSG00000025770	protein_coding	0	0	-0.308838	0.248363	0	0	-0.40916	0.126081	0	0	-0.051192	0.929123	0
TOMM34	ENSG00000025772	protein_coding	0	0	0.339033	0.28468	0	0	0.182781	0.59845	0	0	0.449919	0.270332	0
SEC63	ENSG00000025796	protein_coding	0	0	-0.0971128	0.641256	0	0	0.370039	0.0253952	1	0	0.618953	0.0194987	1
KPNA6	ENSG00000025800	protein_coding	0	0	0.140328	0.423727	0	0	0.456367	0.000790808	1	0	0.11596	0.75375	0
VIM	ENSG00000026025	protein_coding	0	0	-0.319746	0.165387	0	0	-0.561209	0.000430219	0	1	-0.129694	0.752188	0
RTEL1-TNFRSF6B	ENSG00000026036	protein_coding	0	0	-1.58076	NA	0	0	-1.20318	NA	0	0	-2.10376	0.176935	0
FAS	ENSG00000026103	protein_coding	0	0	0.264149	0.765843	0	0	2.13738	0.0167311	1	0	1.74173	0.0615836	0
RNASET2	ENSG00000026297	protein_coding	0	0	-0.170056	0.814301	0	0	-0.990665	0.0338618	0	1	-0.876873	0.126993	0
CD44	ENSG00000026508	protein_coding	0	0	0.842579	NA	0	0	1.38277	NA	0	0	0.33162	NA	0
KCNG1	ENSG00000026559	protein_coding	0	0	0.0369911	0.966453	0	0	-0.538544	0.354533	0	0	-0.187545	0.834872	0
AGPAT4	ENSG00000026652	protein_coding	0	0	-0.153595	0.697044	0	0	-0.228207	0.552453	0	0	0.0198856	0.976724	0
SLAMF7	ENSG00000026751	protein_coding	0	0	NA	NA	0	0	NA	NA	0	0	NA	NA	0
BTN3A1	ENSG00000026950	protein_coding	0	0	-0.539702	0.403504	0	0	0.0305866	0.977265	0	0	0.105659	0.934446	0
MIPEP	ENSG00000027001	protein_coding	0	0	0.117961	0.815916	0	0	0.543372	0.188044	0	0	0.7282	0.134848	0
PRKCH	ENSG00000027075	protein_coding	0	0	-0.153739	0.855927	0	0	-0.0479084	0.961751	0	0	-0.0852428	0.941684	0
INSRR	ENSG00000027644	protein_coding	0	0	-1.11354	NA	0	0	-2.50937	NA	0	0	-2.24602	NA	0
IFNGR1	ENSG00000027697	protein_coding	1	0	0.955616	1.29384e-06	1	0	1.61361	9.99133e-11	1	0	1.69263	1.30145e-08	1
B4GALT7	ENSG00000027847	protein_coding	0	0	-0.346951	0.485713	0	0	-0.455193	0.370589	0	0	-0.618506	0.26485	0
SH2D2A	ENSG00000027869	protein_coding	0	0	-0.51925	0.608335	0	0	-0.659509	0.526221	0	0	-1.35034	0.130194	0
VRK2	ENSG00000028116	protein_coding	0	0	-0.236417	0.616828	0	0	-0.00209462	0.997395	0	0	0.295398	0.66205	0
TNFRSF1B	ENSG00000028137	protein_coding	0	0	0.434999	NA	0	0	-1.68491	NA	0	0	-1.60354	NA	0
VEZT	ENSG00000028203	protein_coding	0	0	-0.0475201	0.894014	0	0	0.891232	0.000386768	1	0	0.705442	0.0316207	1
POU2F2	ENSG00000028277	protein_coding	0	0	0.578827	NA	0	0	2.05154	NA	0	0	-0.666597	0.643882	0
BRD9	ENSG00000028310	protein_coding	0	0	-0.197515	0.619955	0	0	-0.441356	0.204582	0	0	-0.266124	0.639751	0
SNX1	ENSG00000028528	protein_coding	0	0	-0.0039535	0.993098	0	0	0.29121	0.325141	0	0	0.403622	0.287493	0
TBPL1	ENSG00000028839	protein_coding	0	0	0.544956	0.150558	0	0	0.446618	0.300261	0	0	0.947123	0.0509552	0
ARNTL2	ENSG00000029153	protein_coding	0	0	0.535067	0.0518989	0	0	0.966953	0.00190191	1	0	0.73522	0.0874487	0
BCLAF1	ENSG00000029363	protein_coding	0	0	0.0242702	0.904389	0	0	0.691774	2.53562e-13	1	0	0.994516	9.14171e-08	1
SLC39A9	ENSG00000029364	protein_coding	0	0	0.325774	0.0536923	0	0	0.658004	0.000129962	1	0	0.274263	0.440884	0
ANK1	ENSG00000029534	protein_coding	0	0	-0.0741729	0.953971	0	0	0.105218	0.930425	0	0	0.000814538	0.999597	0
IBSP	ENSG00000029559	protein_coding	0	0	NA	NA	0	0	NA	NA	0	0	NA	NA	0
TFB1M	ENSG00000029639	protein_coding	0	0	-0.155208	0.780516	0	0	-0.0398895	0.95056	0	0	0.187689	0.801251	0
RABEP1	ENSG00000029725	protein_coding	0	0	0.267867	0.071554	0	0	0.873593	3.20933e-11	1	0	0.973795	4.59414e-06	1
HMGB3	ENSG00000029993	protein_coding	0	0	0.322719	0.0274853	1	0	0.280944	0.0493497	0	0	0.494155	0.0317839	1
NUP160	ENSG00000030066	protein_coding	1	0	0.612341	3.6684e-06	1	0	1.24974	2.38847e-27	1	0	1.27824	9.39532e-11	1
BAK1	ENSG00000030110	protein_coding	0	0	-0.0378588	0.960004	0	0	-0.641487	0.156163	0	0	-0.419143	0.48868	0
MUSK	ENSG00000030304	protein_coding	0	0	-2.55056	NA	0	0	-3.19308	NA	0	0	-3.66213	NA	0
IKZF2	ENSG00000030419	protein_coding	0	0	-0.379547	0.624012	0	0	0.749658	0.439213	0	0	0.326916	0.78876	0
GRN	ENSG00000030582	protein_coding	0	0	-0.141447	0.66422	0	0	-0.896835	9.33935e-06	0	1	-0.480912	0.19285	0
FAM13B	ENSG00000031003	protein_coding	0	0	0.634689	0.00512335	1	0	0.426993	0.111498	0	0	0.428219	0.251959	0
ARHGAP31	ENSG00000031081	protein_coding	0	0	-0.214184	0.773186	0	0	-0.431851	0.48253	0	0	-0.20936	0.815626	0
CENPQ	ENSG00000031691	protein_coding	0	0	0.46864	0.205966	0	0	1.41822	0.000458922	1	0	1.05068	0.0230929	1
SARS	ENSG00000031698	protein_coding	0	0	0.239772	0.139842	0	0	0.380606	0.00250116	1	0	0.799079	0.0017235	1
RANBP3	ENSG00000031823	protein_coding	0	0	-0.24963	0.379813	0	0	-0.542523	0.0257168	0	1	-0.172155	0.71323	0
ARID4A	ENSG00000032219	protein_coding	0	0	-0.637331	0.0159555	0	1	0.207825	0.648512	0	0	0.343165	0.532291	0
TSSC1	ENSG00000032389	protein_coding	0	0	0.0712599	0.924084	0	0	-0.411726	0.414168	0	0	-0.0839901	0.92324	0
PNPLA6	ENSG00000032444	protein_coding	0	0	-0.428899	0.270207	0	0	-0.631225	0.125692	0	0	-0.00485442	0.995599	0
IFT88	ENSG00000032742	protein_coding	0	0	0.311662	0.632373	0	0	1.1153	0.0830152	0	0	1.3376	0.0721134	0
ALG1	ENSG00000033011	protein_coding	0	0	0.149758	0.800716	0	0	0.0494607	0.939641	0	0	0.00316794	0.997176	0
ZCCHC8	ENSG00000033030	protein_coding	0	0	0.173265	0.626432	0	0	0.314655	0.370829	0	0	0.516861	0.285941	0
ABCF2	ENSG00000033050	protein_coding	0	0	0.265961	0.178473	0	0	0.283671	0.0773468	0	0	0.342644	0.19193	0
CHPF2	ENSG00000033100	protein_coding	0	0	0.266091	0.40897	0	0	0.00047607	0.998931	0	0	-0.0805963	0.880542	0
LRRC7	ENSG00000033122	protein_coding	0	0	-0.266168	0.810523	0	0	-0.177917	0.885626	0	0	-0.882024	0.380689	0
FUT8	ENSG00000033170	protein_coding	0	0	0.303403	0.279985	0	0	0.965526	0.000754745	1	0	0.864235	0.0194048	1
UBA6	ENSG00000033178	protein_coding	0	0	0.235468	0.260494	0	0	1.44832	2.37997e-18	1	0	1.35036	7.06189e-09	1
GAB2	ENSG00000033327	protein_coding	0	0	-0.850273	0.140793	0	0	-0.455386	0.590484	0	0	-0.456394	0.663418	0
ATP6V0A1	ENSG00000033627	protein_coding	0	0	-0.314457	0.152254	0	0	-0.19853	0.454695	0	0	-0.384062	0.236942	0
PIAS1	ENSG00000033800	protein_coding	0	0	-0.634266	0.0102951	0	1	0.11351	0.771508	0	0	0.0746204	0.895904	0
SLC4A7	ENSG00000033867	protein_coding	0	0	0.0226237	0.948378	0	0	1.36808	2.35757e-09	1	0	1.15901	0.00011542	1
APBA2	ENSG00000034053	protein_coding	0	0	1.53233	NA	0	0	-0.371956	0.770992	0	0	-0.275063	0.876055	0
MAP2K3	ENSG00000034152	protein_coding	0	0	0.198417	0.640668	0	0	-0.364862	0.299232	0	0	-0.126935	0.825429	0
EFCAB1	ENSG00000034239	protein_coding	0	0	-1.71461	NA	0	0	NA	NA	0	0	-1.99497	NA	0
TMSB10	ENSG00000034510	protein_coding	0	0	-0.360588	0.115922	0	0	-1.09531	2.87542e-11	0	1	-0.683114	0.0565104	0
ASTE1	ENSG00000034533	protein_coding	0	0	0.134898	0.844317	0	0	0.744558	0.195935	0	0	0.545289	0.429653	0
RNF19A	ENSG00000034677	protein_coding	0	0	0.163514	0.691492	0	0	1.18912	0.00135344	1	0	0.770406	0.092154	0
PEX3	ENSG00000034693	protein_coding	0	0	0.624708	0.102162	0	0	0.396304	0.353975	0	0	0.724117	0.149929	0
GABARAPL2	ENSG00000034713	protein_coding	0	0	0.316319	0.222603	0	0	0.361611	0.188693	0	0	0.683415	0.045938	1
MYOC	ENSG00000034971	protein_coding	0	0	1.38003	NA	0	0	0.567703	NA	0	0	-1.64342	NA	0
SH3YL1	ENSG00000035115	protein_coding	0	0	-0.499062	0.412055	0	0	-0.177365	0.836055	0	0	0.0778384	0.947171	0
FAM136A	ENSG00000035141	protein_coding	0	0	0.388667	0.0804219	0	0	0.285746	0.234378	0	0	0.653942	0.0403395	1
VCL	ENSG00000035403	protein_coding	1	0	0.68413	3.26514e-08	1	0	0.43758	0.00018575	1	0	0.636955	0.00246701	1
DEPDC1B	ENSG00000035499	protein_coding	1	0	0.709439	0.00583809	1	0	1.48424	1.68237e-07	1	0	1.50746	8.77357e-06	1
DAPK2	ENSG00000035664	protein_coding	0	0	-0.123936	NA	0	0	1.09828	NA	0	0	-0.0794738	NA	0
NSMAF	ENSG00000035681	protein_coding	0	0	0.0355728	0.941492	0	0	0.321563	0.41352	0	0	0.396585	0.415546	0
ADSS	ENSG00000035687	protein_coding	0	0	0.0776228	0.791233	0	0	1.01668	4.98195e-07	1	0	1.01473	0.000173686	1
STAP1	ENSG00000035720	protein_coding	0	0	-1.24505	NA	0	0	-1.44924	NA	0	0	-1.27752	NA	0
TIMP2	ENSG00000035862	protein_coding	0	0	0.669281	0.0796817	0	0	0.0321395	0.951332	0	0	0.2076	0.726401	0
RFC1	ENSG00000035928	protein_coding	0	0	0.0950688	0.674281	0	0	0.896534	2.4469e-07	1	0	1.10916	5.39306e-06	1
TBC1D23	ENSG00000036054	protein_coding	0	0	0.136334	0.727545	0	0	0.869848	0.00481152	1	0	0.971579	0.0102866	1
CUL3	ENSG00000036257	protein_coding	0	0	0.285526	0.20214	0	0	0.320889	0.11972	0	0	0.721678	0.00910503	1
MYOM2	ENSG00000036448	protein_coding	0	0	-0.70288	NA	0	0	-0.0280519	NA	0	0	0.734884	NA	0
OTC	ENSG00000036473	protein_coding	0	0	-1.71461	NA	0	0	NA	NA	0	0	NA	NA	0
CYP46A1	ENSG00000036530	protein_coding	0	0	0.346708	NA	0	0	1.8835	NA	0	0	0.469886	NA	0
ZZZ3	ENSG00000036549	protein_coding	1	0	0.696763	2.27334e-08	1	0	1.1141	7.75502e-20	1	0	1.08284	1.35482e-07	1
SLC18A1	ENSG00000036565	protein_coding	0	0	NA	NA	0	0	NA	NA	0	0	NA	NA	0
USP2	ENSG00000036672	protein_coding	0	0	0.442457	0.434683	0	0	-0.20312	0.728523	0	0	-0.201328	0.791344	0
CASR.1	ENSG00000036828	protein_coding	0	0	NA	NA	0	0	NA	NA	0	0	NA	NA	0
TUBG2	ENSG00000037042	protein_coding	0	0	-0.14949	0.908781	0	0	-1.12542	0.164992	0	0	-0.69397	0.521922	0
RPL26L1	ENSG00000037241	protein_coding	0	0	0.138027	0.739157	0	0	-0.0752966	0.861002	0	0	0.0899593	0.878277	0
FLT4	ENSG00000037280	protein_coding	0	0	-0.167809	0.606709	0	0	-0.0779263	0.833659	0	0	0.0819241	0.894335	0
NSUN2	ENSG00000037474	protein_coding	1	0	0.608999	0.00107798	1	0	0.652218	4.08258e-06	1	0	0.864723	0.00011542	1
FBXO42	ENSG00000037637	protein_coding	0	0	0.257807	0.467664	0	0	0.310274	0.371655	0	0	0.121539	0.820604	0
MFAP3	ENSG00000037749	protein_coding	1	0	0.552298	0.0210363	1	0	1.06668	4.49695e-05	1	0	0.831715	0.0214412	1
MRI1	ENSG00000037757	protein_coding	0	0	-0.167863	0.68806	0	0	-0.262864	0.519535	0	0	-0.126767	0.834565	0
METTL1	ENSG00000037897	protein_coding	0	0	-0.744828	0.321215	0	0	-0.924119	0.285947	0	0	-1.10136	0.200593	0
HOXC8	ENSG00000037965	protein_coding	0	0	-0.788845	0.453676	0	0	-1.2648	0.168328	0	0	-0.15228	0.935768	0
AGA	ENSG00000038002	protein_coding	0	0	0.321909	0.573401	0	0	0.443346	0.443713	0	0	1.14956	0.0664261	0
PI4K2B	ENSG00000038210	protein_coding	0	0	-0.00127922	0.998747	0	0	0.791665	0.092792	0	0	1.08109	0.044526	1
BOD1L1	ENSG00000038219	protein_coding	0	0	-0.376317	0.041248	0	1	0.120843	0.615281	0	0	0.410947	0.200783	0
MAT2B	ENSG00000038274	protein_coding	0	0	0.0825938	0.790833	0	0	1.21374	2.72503e-07	1	0	1.08004	0.000659587	1
TLL1	ENSG00000038295	protein_coding	0	0	-0.594097	0.592418	0	0	0.880242	NA	0	0	0.173552	0.933219	0
EDC4	ENSG00000038358	protein_coding	0	0	-0.409713	0.0874375	0	0	-0.264831	0.345166	0	0	-0.114335	0.810043	0
TRIO	ENSG00000038382	protein_coding	0	0	0.19395	0.330617	0	0	0.572158	0.000473418	1	0	0.806142	0.00120501	1
VCAN	ENSG00000038427	protein_coding	0	0	0.083317	0.727545	0	0	0.736363	7.78663e-07	1	0	0.869503	0.000152712	1
CLEC16A	ENSG00000038532	protein_coding	0	0	0.319582	0.281794	0	0	0.302581	0.351708	0	0	0.131968	0.787348	0
MSR1	ENSG00000038945	protein_coding	0	0	NA	NA	0	0	NA	NA	0	0	NA	NA	0
CDH1	ENSG00000039068	protein_coding	0	0	0.604825	0.498652	0	0	0.380409	0.689614	0	0	0.784337	0.463464	0
SKIV2L2	ENSG00000039123	protein_coding	0	0	0.107826	0.584821	0	0	0.887327	7.02194e-10	1	0	0.91564	4.01377e-05	1
DNAH5	ENSG00000039139	protein_coding	0	0	-0.385754	NA	0	0	0.546251	NA	0	0	0.802306	NA	0
ZFYVE16	ENSG00000039319	protein_coding	0	0	0.326554	0.106082	0	0	1.19342	2.2841e-09	1	0	1.27231	2.91537e-06	1
FAM65A	ENSG00000039523	protein_coding	0	0	-1.30199	NA	0	0	-1.73391	NA	0	0	-0.907653	NA	0
C6	ENSG00000039537	protein_coding	0	0	NA	NA	0	0	NA	NA	0	0	NA	NA	0
RAI14	ENSG00000039560	protein_coding	0	0	0.135	0.640501	0	0	0.853449	1.73836e-05	1	0	0.868795	0.00123046	1
SOX30	ENSG00000039600	protein_coding	0	0	-2.42576	NA	0	0	-2.16632	NA	0	0	-3.73998	NA	0
PNKP	ENSG00000039650	protein_coding	0	0	-0.708736	0.0661642	0	0	-0.910063	0.024561	0	1	-0.534959	0.414316	0
BEST2	ENSG00000039987	protein_coding	0	0	-2.56375	NA	0	0	-2.09479	NA	0	0	-2.61803	NA	0
PHLPP2	ENSG00000040199	protein_coding	0	0	0.398353	0.122835	0	0	0.168595	0.59181	0	0	0.29029	0.473337	0
SPDL1	ENSG00000040275	protein_coding	0	0	0.0749832	0.756816	0	0	0.97723	1.50387e-07	1	0	1.0399	2.30805e-05	1
STAU2	ENSG00000040341	protein_coding	0	0	-0.0248676	0.959483	0	0	0.620439	0.0811943	0	0	0.499723	0.269411	0
PQLC2	ENSG00000040487	protein_coding	0	0	-0.206341	0.796048	0	0	-0.269346	0.720125	0	0	-0.435924	0.593703	0
CTNS	ENSG00000040531	protein_coding	0	0	0.152065	0.82068	0	0	-0.214449	0.704689	0	0	-0.840631	0.098742	0
RTN4R	ENSG00000040608	protein_coding	0	0	0.452643	NA	0	0	-1.19197	0.208156	0	0	-0.126233	0.945582	0
PHF23	ENSG00000040633	protein_coding	0	0	0.711011	0.00316263	1	0	0.108852	0.722159	0	0	0.258795	0.513507	0
CDH10	ENSG00000040731	protein_coding	0	0	-0.660895	NA	0	0	2.27006	NA	0	0	0.0872501	NA	0
INPP4A	ENSG00000040933	protein_coding	0	0	-0.103003	0.754853	0	0	0.176851	0.539917	0	0	0.178179	0.671703	0
RAB27B	ENSG00000041353	protein_coding	0	0	0.898544	NA	0	0	0.463946	NA	0	0	0.961988	NA	0
PSMA4	ENSG00000041357	protein_coding	1	0	0.355124	0.00914661	1	0	0.726122	3.20057e-08	1	0	0.789742	0.000240721	1
MYO16	ENSG00000041515	protein_coding	0	0	NA	NA	0	0	NA	NA	0	0	NA	NA	0
LSG1	ENSG00000041802	protein_coding	0	0	0.377679	0.241366	0	0	0.362496	0.280398	0	0	0.631881	0.12374	0
PARP3	ENSG00000041880	protein_coding	0	0	-0.176756	0.906684	0	0	-0.823857	0.43598	0	0	-0.334917	0.831349	0
TNC	ENSG00000041982	protein_coding	0	0	0.319635	0.71908	0	0	0.963656	0.284064	0	0	0.433736	0.692016	0
THAP3	ENSG00000041988	protein_coding	0	0	-0.95003	0.151251	0	0	-0.85418	0.311553	0	0	-0.869481	0.357856	0
FAM65C	ENSG00000042062	protein_coding	0	0	0.0218675	NA	0	0	-0.420591	0.744953	0	0	-0.890911	0.463155	0
TDP1	ENSG00000042088	protein_coding	0	0	0.00442883	0.993626	0	0	-0.102302	0.802501	0	0	0.0434248	0.94319	0
AIFM2	ENSG00000042286	protein_coding	0	0	-0.590397	0.599283	0	0	-1.10407	0.228881	0	0	-1.10569	0.28167	0
C2orf83	ENSG00000042304	protein_coding	0	0	-1.71461	NA	0	0	-2.16632	NA	0	0	-4.58319	NA	0
SPATA7	ENSG00000042317	protein_coding	0	0	-0.547496	0.410672	0	0	1.09085	0.23749	0	0	0.425291	0.708823	0
MED17	ENSG00000042429	protein_coding	0	0	0.362013	0.176467	0	0	0.890385	0.00137734	1	0	0.764961	0.0265579	1
RETSAT	ENSG00000042445	protein_coding	0	0	-0.4468	0.397663	0	0	-0.492673	0.336743	0	0	-0.439359	0.507083	0
CAPG	ENSG00000042493	protein_coding	0	0	0.099748	NA	0	0	-0.918455	0.400304	0	0	-0.531847	0.72412	0
AP2S1	ENSG00000042753	protein_coding	0	0	-0.288491	0.543859	0	0	-1.58884	1.8018e-11	0	1	-0.986084	0.00784172	0
USH2A	ENSG00000042781	protein_coding	0	0	-0.872591	0.207344	0	0	-0.259138	0.814763	0	0	-1.09677	0.214744	0
ZPBP	ENSG00000042813	protein_coding	0	0	NA	NA	0	0	NA	NA	0	0	NA	NA	0
TG	ENSG00000042832	protein_coding	0	0	0.0658899	NA	0	0	-2.72324	NA	0	0	-2.76508	NA	0
ADAM28	ENSG00000042980	protein_coding	0	0	NA	NA	0	0	NA	NA	0	0	NA	NA	0
BARX2	ENSG00000043039	protein_coding	0	0	-0.0136434	0.993098	0	0	0.506419	0.681081	0	0	1.05172	0.452418	0
DCUN1D1	ENSG00000043093	protein_coding	0	0	0.297401	0.225688	0	0	1.03286	2.42026e-05	1	0	1.00002	0.00154185	1
JADE2	ENSG00000043143	protein_coding	0	0	-0.966203	0.0360783	0	1	-0.5886	0.3879	0	0	0.236114	0.833455	0
ZIC2	ENSG00000043355	protein_coding	0	0	0.295978	0.141865	0	0	0.309595	0.145467	0	0	0.223354	0.544938	0
LCP2	ENSG00000043462	protein_coding	0	0	0.485005	NA	0	0	-1.66028	NA	0	0	0.876362	NA	0
TRIT1	ENSG00000043514	protein_coding	0	0	0.44968	0.262121	0	0	0.62217	0.165052	0	0	0.588589	0.271274	0
ADRB1	ENSG00000043591	protein_coding	0	0	0.523629	NA	0	0	0.448632	NA	0	0	1.84565	NA	0
GUCA2B	ENSG00000044012	protein_coding	0	0	-0.285948	NA	0	0	-2.26791	NA	0	0	-1.71425	NA	0
CUL7	ENSG00000044090	protein_coding	0	1	-0.680374	0.0229364	0	1	-0.905172	0.00638045	0	1	-0.827875	0.0603605	0
CTNNA1	ENSG00000044115	protein_coding	1	0	0.412144	0.00354619	1	0	0.725822	2.97873e-08	1	0	1.11381	2.90283e-07	1
PHKA2	ENSG00000044446	protein_coding	0	0	-0.106836	0.794759	0	0	-0.00471147	0.99187	0	0	-0.0310721	0.958992	0
CNTLN	ENSG00000044459	protein_coding	0	0	-0.343355	0.387281	0	0	0.212576	0.657338	0	0	0.164795	0.797792	0
EPHA3	ENSG00000044524	protein_coding	0	0	-0.0604741	0.911612	0	0	1.0308	0.0197541	1	0	1.02374	0.0444034	1
HSPA5	ENSG00000044574	protein_coding	1	0	0.991863	1.3774e-16	1	0	0.743605	5.08099e-19	1	0	0.947466	1.6072e-06	1
DSG2	ENSG00000046604	protein_coding	0	0	0.206498	0.195011	0	0	1.00096	1.66813e-16	1	0	1.10347	2.06476e-07	1
GEMIN8	ENSG00000046647	protein_coding	0	0	-0.375827	0.649256	0	0	-0.0142492	0.990446	0	0	-0.0994849	0.940017	0
OFD1	ENSG00000046651	protein_coding	0	0	-0.164819	0.606709	0	0	0.486739	0.130988	0	0	0.485201	0.234435	0
GPM6B	ENSG00000046653	protein_coding	0	0	-0.0971527	0.834596	0	0	0.779381	0.0565905	0	0	0.628297	0.207652	0
MAGEC2	ENSG00000046774	protein_coding	0	0	NA	NA	0	0	NA	NA	0	0	NA	NA	0
PREX2	ENSG00000046889	protein_coding	0	0	-0.268512	0.569859	0	0	0.693592	0.186179	0	0	1.17819	0.0506894	0
WDR37	ENSG00000047056	protein_coding	0	0	0.368029	0.286989	0	0	0.579441	0.0954058	0	0	0.356074	0.45038	0
YTHDC2	ENSG00000047188	protein_coding	0	0	0.261229	0.0910761	0	0	1.11357	1.1661e-13	1	0	1.23913	1.7631e-07	1
CTPS2	ENSG00000047230	protein_coding	1	0	0.485331	0.0314405	1	0	0.823734	0.00108325	1	0	0.871196	0.0123362	1
ATP6V1H	ENSG00000047249	protein_coding	0	0	0.35088	0.229855	0	0	0.865041	0.0024015	1	0	0.897735	0.0124447	1
POLR2B	ENSG00000047315	protein_coding	1	0	0.395702	0.0153341	1	0	1.30089	9.97699e-32	1	0	1.47434	2.16715e-14	1
FAM214A	ENSG00000047346	protein_coding	0	0	-0.235126	0.723672	0	0	0.195709	0.799935	0	0	0.436332	0.623739	0
ARAP2	ENSG00000047365	protein_coding	0	0	-0.126231	0.829565	0	0	0.712465	0.212351	0	0	0.734901	0.270562	0
TPR	ENSG00000047410	protein_coding	0	0	-0.15983	0.188426	0	0	0.473974	2.79594e-08	1	0	0.850559	1.74965e-05	1
CP	ENSG00000047457	protein_coding	0	0	-0.941332	NA	0	0	-1.17235	NA	0	0	-1.87148	0.244324	0
KIAA0556	ENSG00000047578	protein_coding	0	0	-0.273529	0.609068	0	0	-0.318053	0.530229	0	0	0.00817085	0.99168	0
DTNBP1	ENSG00000047579	protein_coding	0	0	-0.369648	0.537267	0	0	-0.974845	0.0420478	0	1	-0.283882	0.745767	0
XK	ENSG00000047597	protein_coding	0	0	0.261055	0.777343	0	0	0.603878	0.486613	0	0	0.579027	0.569108	0
ANO2	ENSG00000047617	protein_coding	0	0	-0.883981	NA	0	0	-0.817026	NA	0	0	-0.281593	NA	0
C12orf4	ENSG00000047621	protein_coding	0	0	0.186552	0.608668	0	0	0.981009	0.0014237	1	0	0.962973	0.0101732	1
SCML1	ENSG00000047634	protein_coding	0	0	0.336019	0.0963891	0	0	0.818922	0.000172057	1	0	0.992938	0.000337533	1
WWC3	ENSG00000047644	protein_coding	0	0	1.27625	NA	0	0	1.06939	NA	0	0	0.673226	NA	0
ARHGAP6	ENSG00000047648	protein_coding	0	0	-2.16105	NA	0	0	-1.74751	NA	0	0	-1.61955	NA	0
FAM184B	ENSG00000047662	protein_coding	0	0	0.0215029	NA	0	0	-1.05788	0.375954	0	0	-1.46224	0.209228	0
MAP4	ENSG00000047849	protein_coding	0	0	-0.0652778	0.746164	0	0	-0.18439	0.16889	0	0	0.0870068	0.791823	0
GOPC	ENSG00000047932	protein_coding	0	0	0.115016	0.676524	0	0	1.1075	8.23869e-08	1	0	1.19087	2.15346e-05	1
ROS1	ENSG00000047936	protein_coding	0	0	NA	NA	0	0	-2.25388	NA	0	0	-3.03822	NA	0
USP28	ENSG00000048028	protein_coding	0	0	-0.0364192	0.919776	0	0	0.672291	0.00551601	1	0	0.809453	0.0100974	1
HDAC9	ENSG00000048052	protein_coding	0	0	0.416946	0.630474	0	0	0.558788	0.556301	0	0	1.32475	0.188269	0
TSPAN17	ENSG00000048140	protein_coding	0	0	0.444899	0.168965	0	0	-0.035479	0.936383	0	0	-0.0350516	0.95896	0
NOP16	ENSG00000048162	protein_coding	0	0	0.525709	0.183796	0	0	-0.00864549	0.987933	0	0	0.152085	0.810043	0
CC2D2A	ENSG00000048342	protein_coding	0	0	0.211514	0.688751	0	0	0.105208	0.85807	0	0	0.219397	0.741657	0
RRM2B	ENSG00000048392	protein_coding	1	0	0.543253	0.0058488	1	0	1.62788	4.56263e-12	1	0	1.75441	1.87302e-09	1
ZNF800	ENSG00000048405	protein_coding	0	0	0.447284	0.0665066	0	0	0.602351	0.0275927	1	0	0.83708	0.0148074	1
TNFRSF17	ENSG00000048462	protein_coding	0	0	-0.415189	NA	0	0	0.205173	NA	0	0	-2.41826	NA	0
SNX29	ENSG00000048471	protein_coding	0	0	0.392857	0.322437	0	0	0.499091	0.19467	0	0	0.518425	0.279682	0
LMO3	ENSG00000048540	protein_coding	0	0	-2.96608	NA	0	0	-2.31842	NA	0	0	0.841819	NA	0
MRPS10	ENSG00000048544	protein_coding	0	0	0.370105	0.136067	0	0	1.15268	1.13612e-05	1	0	0.949268	0.00354707	1
GUCA1A	ENSG00000048545	protein_coding	0	0	0.00275238	NA	0	0	-1.24265	NA	0	0	-1.32367	NA	0
RSF1	ENSG00000048649	protein_coding	0	0	-0.155605	0.397284	0	0	0.704131	1.06356e-05	1	0	0.753653	0.00148867	1
VPS13D	ENSG00000048707	protein_coding	0	0	0.127667	0.565095	0	0	0.40522	0.0140486	1	0	0.549532	0.0316358	1
CELF2	ENSG00000048740	protein_coding	0	0	-1.03207	0.000718759	0	1	0.368055	0.537036	0	0	0.0441031	0.960763	0
FAM120A	ENSG00000048828	protein_coding	0	0	0.117124	0.575503	0	0	0.236118	0.159303	0	0	0.373649	0.16843	0
R3HDM1	ENSG00000048991	protein_coding	0	0	-0.42245	0.105704	0	0	-0.161789	0.580617	0	0	-0.216981	0.59756	0
COL9A2	ENSG00000049089	protein_coding	0	0	0.21434	NA	0	0	-0.974916	0.370963	0	0	-1.05787	0.392459	0
KITLG	ENSG00000049130	protein_coding	0	0	0.126044	0.775368	0	0	1.05519	0.00446141	1	0	1.12214	0.0106045	1
ERCC8	ENSG00000049167	protein_coding	0	0	0.534029	0.176604	0	0	0.948687	0.0280987	1	0	0.668628	0.206243	0
ADAMTS6	ENSG00000049192	protein_coding	0	0	-1.33597	0.0257787	0	1	-0.301615	0.801391	0	0	-0.548077	0.663418	0
H6PD	ENSG00000049239	protein_coding	0	0	0.0939498	0.820248	0	0	-0.144155	0.702894	0	0	-0.122305	0.816724	0
VAMP3	ENSG00000049245	protein_coding	0	0	-0.0221526	0.956001	0	0	0.146334	0.639738	0	0	0.474621	0.181594	0
PER3	ENSG00000049246	protein_coding	0	0	-0.0164803	0.991231	0	0	0.569412	0.62917	0	0	0.837818	0.545726	0
UTS2	ENSG00000049247	protein_coding	0	0	NA	NA	0	0	-2.25388	NA	0	0	-3.03822	NA	0
TNFRSF9	ENSG00000049249	protein_coding	0	0	0.434067	NA	0	0	2.68045	NA	0	0	-0.993158	NA	0
EPN3	ENSG00000049283	protein_coding	0	0	-0.471131	NA	0	0	-1.37988	NA	0	0	-2.23958	NA	0
LTBP1	ENSG00000049323	protein_coding	0	0	0.366674	0.157386	0	0	0.801144	0.00133484	1	0	1.05706	0.000647068	1
RCN1	ENSG00000049449	protein_coding	1	0	0.411925	0.0145075	1	0	0.485263	0.00270659	1	0	0.846241	0.000390718	1
ELN	ENSG00000049540	protein_coding	0	0	NA	NA	0	0	-3.19308	NA	0	0	NA	NA	0
RFC2	ENSG00000049541	protein_coding	0	0	-0.10223	0.746164	0	0	-0.0376268	0.913723	0	0	0.224164	0.641076	0
ARID1B	ENSG00000049618	protein_coding	0	0	-0.163086	0.402783	0	0	-0.0720243	0.713773	0	0	-0.107904	0.752188	0
CLPTM1L	ENSG00000049656	protein_coding	0	0	0.422276	0.379895	0	0	-0.0934454	0.865664	0	0	0.339942	0.602769	0
NEDD4L	ENSG00000049759	protein_coding	0	0	-0.00970254	0.98816	0	0	0.300122	0.535586	0	0	0.200206	0.761867	0
FOXP3	ENSG00000049768	protein_coding	0	0	-0.558408	NA	0	0	-2.11538	NA	0	0	-0.899307	NA	0
PPP1R3F	ENSG00000049769	protein_coding	0	0	-0.203665	0.855927	0	0	-0.418687	0.649251	0	0	-0.273437	0.822946	0
HEXB	ENSG00000049860	protein_coding	0	0	-0.107046	0.804006	0	0	-0.288217	0.35631	0	0	-0.128257	0.807732	0
PTCD2	ENSG00000049883	protein_coding	0	0	-0.00847059	0.989153	0	0	-0.0961231	0.842901	0	0	-0.444452	0.420418	0
KIAA2022	ENSG00000050030	protein_coding	0	0	1.32972	0.0608255	0	0	1.68131	0.0455336	1	0	1.91051	0.0390277	1
JKAMP	ENSG00000050130	protein_coding	0	0	0.655882	0.033588	1	0	1.02517	0.00318525	1	0	0.56946	0.263479	0
DKK3	ENSG00000050165	protein_coding	0	0	-0.589248	0.56783	0	0	-0.976643	0.30254	0	0	-1.33555	0.149819	0
ARHGEF5	ENSG00000050327	protein_coding	0	0	NA	NA	0	0	NA	NA	0	0	NA	NA	0
NFE2L3	ENSG00000050344	protein_coding	0	0	-0.317153	0.426174	0	0	0.0214528	0.970587	0	0	0.0411275	0.955854	0
MCUR1	ENSG00000050393	protein_coding	0	0	0.275196	0.347068	0	0	0.302442	0.342622	0	0	0.00944669	0.987036	0
LIMA1	ENSG00000050405	protein_coding	1	0	0.550206	0.0025712	1	0	1.01312	1.11874e-06	1	0	1.28792	3.73924e-06	1
LETMD1	ENSG00000050426	protein_coding	0	0	-0.698607	0.0268283	0	1	-0.00956186	0.988764	0	0	-0.513262	0.330226	0
SLC4A8	ENSG00000050438	protein_coding	0	0	-0.0595439	0.963409	0	0	0.111221	0.931124	0	0	0.246163	0.874026	0
LAMC3	ENSG00000050555	protein_coding	0	0	0.188314	0.810654	0	0	-0.278175	0.692773	0	0	-0.10117	0.922292	0
PTGER3	ENSG00000050628	protein_coding	0	0	-0.412287	0.766996	0	0	-1.41213	0.121349	0	0	-1.20507	0.277889	0
TNIP3	ENSG00000050730	protein_coding	0	0	-0.0532289	NA	0	0	0.300189	NA	0	0	-0.674121	NA	0
MAPK9	ENSG00000050748	protein_coding	0	0	0.0858245	0.765619	0	0	0.671746	0.00100023	1	0	0.690053	0.0148183	1
COL23A1	ENSG00000050767	protein_coding	0	0	0.278896	0.815147	0	0	-0.386979	0.707048	0	0	-0.118126	0.937184	0
BCAR1	ENSG00000050820	protein_coding	0	0	0.634916	0.0159775	1	0	0.123633	0.723187	0	0	0.121645	0.816724	0
FAM160A2	ENSG00000051009	protein_coding	0	0	-0.233059	0.634128	0	0	-0.158008	0.776233	0	0	-0.484504	0.407553	0
HERPUD1	ENSG00000051108	protein_coding	0	0	0.558701	0.0769515	0	0	0.502101	0.112293	0	0	1.03671	0.00527328	1
HOMER3	ENSG00000051128	protein_coding	0	0	0.100435	NA	0	0	-0.171088	NA	0	0	-0.71575	0.661787	0
RAD51	ENSG00000051180	protein_coding	0	0	-0.268395	0.600473	0	0	-0.0749501	0.908987	0	0	0.49861	0.519965	0
POLQ	ENSG00000051341	protein_coding	0	0	-0.365738	0.0208577	0	1	0.416056	0.043601	1	0	0.319197	0.313288	0
PIK3CB	ENSG00000051382	protein_coding	0	0	0.0971392	0.796048	0	0	0.964942	0.00153428	1	0	0.87974	0.0246165	1
CYBA	ENSG00000051523	protein_coding	0	0	-0.471524	0.276004	0	0	-1.38434	4.08388e-05	0	1	-1.16455	0.011972	0
THOC3	ENSG00000051596	protein_coding	0	0	0.0308065	0.936842	0	0	0.157864	0.551487	0	0	0.337875	0.335921	0
HEBP2	ENSG00000051620	protein_coding	0	0	-0.244661	0.381869	0	0	-0.386318	0.159105	0	0	-0.0788274	0.878311	0
MPHOSPH9	ENSG00000051825	protein_coding	0	0	0.335442	0.0544679	0	0	0.685266	6.73052e-05	1	0	0.637436	0.0155295	1
PLEKHA5	ENSG00000052126	protein_coding	0	0	-0.137328	0.701819	0	0	0.617532	0.0672341	0	0	0.615986	0.135625	0
PRSS8	ENSG00000052344	protein_coding	0	0	-0.292857	NA	0	0	-0.51722	NA	0	0	-1.05374	NA	0
SIKE1	ENSG00000052723	protein_coding	0	0	0.272617	0.0946683	0	0	1.02464	1.07955e-11	1	0	0.949666	7.47183e-05	1
RRP12	ENSG00000052749	protein_coding	0	0	-0.196469	0.521118	0	0	-0.492519	0.0225142	0	1	-0.419409	0.190081	0
FNIP2	ENSG00000052795	protein_coding	0	0	0.222342	0.418805	0	0	0.806322	0.00285286	1	0	0.825355	0.0139211	1
MSMO1	ENSG00000052802	protein_coding	0	0	0.895149	0.000648435	1	0	1.0921	5.70702e-05	1	0	0.421218	0.298967	0
TTC17	ENSG00000052841	protein_coding	0	0	-0.0830164	0.801611	0	0	0.415478	0.143996	0	0	0.378371	0.325417	0
ALX4	ENSG00000052850	protein_coding	0	0	0.10316	0.833479	0	0	0.0709568	0.889763	0	0	0.137872	0.84026	0
FSTL4	ENSG00000053108	protein_coding	0	0	-1.01737	NA	0	0	0.413397	NA	0	0	-0.0665167	NA	0
FOXN3	ENSG00000053254	protein_coding	0	0	0.117323	0.715995	0	0	0.405805	0.143746	0	0	0.439949	0.227692	0
METTL24	ENSG00000053328	protein_coding	0	0	1.00585	NA	0	0	0.226188	NA	0	0	1.43101	NA	0
AKR7A2	ENSG00000053371	protein_coding	0	0	-0.00627853	0.990778	0	0	-0.260869	0.469789	0	0	0.0694044	0.913703	0
MRTO4	ENSG00000053372	protein_coding	0	0	0.623653	0.0122148	1	0	0.36591	0.140875	0	0	0.310307	0.39142	0
NNAT	ENSG00000053438	protein_coding	0	0	0.00550293	NA	0	0	-1.71499	NA	0	0	-2.32132	NA	0
USE1	ENSG00000053501	protein_coding	0	0	-0.323353	0.740219	0	0	-0.804677	0.331913	0	0	-0.438061	0.714811	0
MCF2L2	ENSG00000053524	protein_coding	0	0	-0.740863	0.487899	0	0	0.279515	NA	0	0	-0.291969	0.874026	0
NRIP2	ENSG00000053702	protein_coding	0	0	-0.288618	NA	0	0	-0.962663	0.41714	0	0	-1.44855	0.18987	0
LAMA3	ENSG00000053747	protein_coding	0	0	-0.899636	0.000168116	0	1	-0.392478	0.303403	0	0	-0.16994	0.775651	0
AP5M1	ENSG00000053770	protein_coding	0	0	0.111499	0.71925	0	0	0.886236	0.000470161	1	0	0.751027	0.0194086	1
ANAPC4	ENSG00000053900	protein_coding	0	0	-0.0539833	0.91756	0	0	0.380416	0.352057	0	0	0.311969	0.559403	0
KCNQ1	ENSG00000053918	protein_coding	0	0	-0.296939	NA	0	0	-0.734053	NA	0	0	-1.15685	0.483995	0
TRAPPC3	ENSG00000054116	protein_coding	0	0	-0.207883	0.628212	0	0	-0.180779	0.674366	0	0	-0.0533395	0.937266	0
THRAP3	ENSG00000054118	protein_coding	0	0	0.216407	0.109798	0	0	0.439919	2.86763e-05	1	0	0.750379	0.000373703	1
PHPT1	ENSG00000054148	protein_coding	0	0	-0.33774	0.547765	0	0	-0.950501	0.0197415	0	1	-0.55099	0.429451	0
ENTPD2	ENSG00000054179	protein_coding	0	0	0.814423	NA	0	0	-1.02177	NA	0	0	-1.62479	NA	0
LY75	ENSG00000054219	protein_coding	0	0	-0.994777	NA	0	0	-1.3801	NA	0	0	-3.0651	NA	0
ARID4B	ENSG00000054267	protein_coding	0	0	0.0915438	0.685159	0	0	0.804668	8.67668e-07	1	0	1.05565	9.02661e-06	1
OPN3	ENSG00000054277	protein_coding	0	0	-0.726802	NA	0	0	0.136794	NA	0	0	-0.567504	NA	0
SDCCAG8	ENSG00000054282	protein_coding	0	0	-0.585779	NA	0	0	0.122861	NA	0	0	-0.63181	NA	0
PTPRN	ENSG00000054356	protein_coding	0	0	-1.86192	NA	0	0	-1.10701	NA	0	0	-0.084849	NA	0
HHAT	ENSG00000054392	protein_coding	0	0	-1.71461	NA	0	0	NA	NA	0	0	-4.15537	NA	0
KIF1B	ENSG00000054523	protein_coding	0	0	-0.102998	0.624495	0	0	0.592091	0.000119334	1	0	0.4328	0.110291	0
FOXC1	ENSG00000054598	protein_coding	0	0	0.283008	0.0812381	0	0	-0.0364564	0.845004	0	0	0.119689	0.748288	0
TBC1D22A	ENSG00000054611	protein_coding	0	0	-0.466917	0.260095	0	0	-0.41821	0.401032	0	0	-0.477326	0.443489	0
SYNE2	ENSG00000054654	protein_coding	0	0	-0.0636189	0.760109	0	0	0.466004	0.00251784	1	0	0.613691	0.00947411	1
PLEKHH1	ENSG00000054690	protein_coding	0	0	-0.237107	0.55746	0	0	-0.109241	0.825396	0	0	-0.265431	0.624858	0
ATP9A	ENSG00000054793	protein_coding	0	0	-0.0275931	0.944257	0	0	0.148107	0.601747	0	0	0.253984	0.512276	0
SPO11	ENSG00000054796	protein_coding	0	0	NA	NA	0	0	NA	NA	0	0	-2.13227	NA	0
CBLN4	ENSG00000054803	protein_coding	0	0	NA	NA	0	0	NA	NA	0	0	NA	NA	0
CHRDL2	ENSG00000054938	protein_coding	0	0	-1.14221	NA	0	0	-1.01732	NA	0	0	-1.4352	NA	0
FAM168A	ENSG00000054965	protein_coding	0	0	0.285216	0.28978	0	0	0.130875	0.647603	0	0	0.429685	0.214258	0
RELT	ENSG00000054967	protein_coding	0	0	-0.0955103	0.925476	0	0	-0.722407	0.297778	0	0	-0.675491	0.474591	0
GALC	ENSG00000054983	protein_coding	0	0	0.465107	0.65054	0	0	0.25762	0.819529	0	0	0.951476	0.434306	0
NOP58	ENSG00000055044	protein_coding	1	0	0.495816	0.000458033	1	0	0.489821	0.00117541	1	0	0.657051	0.00486294	1
SZRD1	ENSG00000055070	protein_coding	0	0	0.161675	0.537591	0	0	-0.0584389	0.830549	0	0	0.392898	0.246637	0
KCNH2	ENSG00000055118	protein_coding	0	0	-0.564756	NA	0	0	-0.469957	NA	0	0	-0.182104	0.933727	0
CUL1	ENSG00000055130	protein_coding	1	0	0.563044	8.39503e-05	1	0	1.06468	1.80831e-16	1	0	1.03708	7.59876e-07	1
FAM114A2	ENSG00000055147	protein_coding	0	0	0.477291	0.0932641	0	0	1.49985	3.3952e-06	1	0	1.13818	0.00478868	1
CYFIP2	ENSG00000055163	protein_coding	0	0	-0.130369	0.712613	0	0	-0.419694	0.0911802	0	0	0.128832	0.802576	0
TAB2	ENSG00000055208	protein_coding	0	0	0.132615	0.582396	0	0	0.418246	0.0356006	1	0	0.470933	0.103968	0
GINM1	ENSG00000055211	protein_coding	0	0	0.315464	0.397284	0	0	0.499474	0.192404	0	0	0.789991	0.0790879	0
EIF2AK2	ENSG00000055332	protein_coding	0	0	0.143729	0.55124	0	0	0.508838	0.00433615	1	0	0.349275	0.259013	0
USP36	ENSG00000055483	protein_coding	0	0	0.216038	0.420243	0	0	-0.410652	0.0537111	0	0	-0.16474	0.681857	0
KMT2C	ENSG00000055609	protein_coding	0	0	-0.229646	0.0977775	0	0	0.288941	0.0287278	0	0	0.508825	0.0265944	1
MCOLN3	ENSG00000055732	protein_coding	0	0	0.605579	0.334691	0	0	1.21909	0.0668909	0	0	0.447496	0.584923	0
CCDC85A	ENSG00000055813	protein_coding	0	0	0.367964	NA	0	0	0.567703	NA	0	0	3.16781	NA	0
PUM2	ENSG00000055917	protein_coding	1	0	0.427371	0.00293801	1	0	1.62745	5.80801e-34	1	0	1.75347	7.05982e-17	1
MRPL43	ENSG00000055950	protein_coding	0	0	-0.227158	0.537355	0	0	-0.189596	0.667484	0	0	-0.0171075	0.98081	0
ITIH4	ENSG00000055955	protein_coding	0	0	-0.0328601	NA	0	0	0.649164	NA	0	0	0.746272	NA	0
ITIH1	ENSG00000055957	protein_coding	0	0	0.0534691	NA	0	0	-1.28867	NA	0	0	-1.22109	NA	0
HPF1	ENSG00000056050	protein_coding	0	0	0.0974374	0.856266	0	0	0.356583	0.42816	0	0	0.380973	0.497234	0
ZFR	ENSG00000056097	protein_coding	0	0	0.144179	0.479666	0	0	0.469377	0.000342468	1	0	0.671637	0.00609297	1
ZNF280C	ENSG00000056277	protein_coding	0	0	0.235931	0.44065	0	0	0.441222	0.140998	0	0	0.0117722	0.983621	0
NPFFR2	ENSG00000056291	protein_coding	0	0	2.84715	NA	0	0	2.10419	NA	0	0	3.77763	NA	0
PHF21B	ENSG00000056487	protein_coding	0	0	-0.524367	0.43068	0	0	0.207	0.832615	0	0	-0.0546545	0.965853	0
TRAF1	ENSG00000056558	protein_coding	0	0	0.1376	NA	0	0	0.48085	NA	0	0	0.367865	NA	0
RC3H2	ENSG00000056586	protein_coding	1	0	0.669303	8.77495e-09	1	0	1.01646	1.38854e-16	1	0	1.01853	3.16336e-06	1
IL17RB	ENSG00000056736	protein_coding	0	0	0.346502	0.591187	0	0	0.124232	0.85807	0	0	0.249253	0.769491	0
TRAF3IP2	ENSG00000056972	protein_coding	0	0	-0.235944	0.764863	0	0	-0.133091	0.875488	0	0	-0.0846609	0.939748	0
GYG2	ENSG00000056998	protein_coding	0	0	-0.0912548	0.866949	0	0	-0.300689	0.49163	0	0	-0.174168	0.793571	0
DCBLD2	ENSG00000057019	protein_coding	0	0	0.0468877	0.86848	0	0	0.778966	0.000109359	1	0	0.463527	0.203687	0
SERPINB3	ENSG00000057149	protein_coding	0	0	NA	NA	0	0	NA	NA	0	0	NA	NA	0
SOAT1	ENSG00000057252	protein_coding	0	0	0.492227	0.00120151	1	0	1.14445	2.75152e-11	1	0	0.489519	0.171647	0
PKP2	ENSG00000057294	protein_coding	0	0	0.163411	0.717453	0	0	0.815423	0.0421486	1	0	0.836334	0.082254	0
MSH4	ENSG00000057468	protein_coding	0	0	-0.301863	0.766273	0	0	0.69473	0.558437	0	0	-0.707577	0.552991	0
F7	ENSG00000057593	protein_coding	0	0	-0.285885	NA	0	0	-1.75765	NA	0	0	-1.60354	NA	0
GDI2	ENSG00000057608	protein_coding	1	0	0.345022	0.0154707	1	0	0.83899	3.89926e-15	1	0	0.966518	7.22806e-07	1
PRDM1	ENSG00000057657	protein_coding	0	0	-1.71461	NA	0	0	NA	NA	0	0	-4.09644	NA	0
ATG5	ENSG00000057663	protein_coding	0	0	0.605849	0.0790564	0	0	1.3988	0.000556127	1	0	1.24424	0.00730444	1
TMCC3	ENSG00000057704	protein_coding	0	0	0.439042	0.446485	0	0	0.654484	0.272627	0	0	0.717934	0.299293	0
PITHD1	ENSG00000057757	protein_coding	0	0	0.0544895	0.917169	0	0	-0.484444	0.141085	0	0	-0.00840929	0.989693	0
MTA3	ENSG00000057935	protein_coding	0	0	-0.118184	0.77504	0	0	0.239784	0.564012	0	0	0.323179	0.546059	0
USP13	ENSG00000058056	protein_coding	0	0	0.254483	0.245475	0	0	0.815001	0.000194483	1	0	0.918301	0.00110159	1
ATP11B	ENSG00000058063	protein_coding	0	0	0.165702	0.487278	0	0	1.08589	7.99382e-07	1	0	1.04126	0.000177146	1
LAMC2	ENSG00000058085	protein_coding	0	0	0.290983	NA	0	0	0.518147	NA	0	0	-0.436916	0.812848	0
CDK14	ENSG00000058091	protein_coding	0	0	0.414402	0.229315	0	0	0.928924	0.0150933	1	0	1.28807	0.00251615	1
SEC61A1	ENSG00000058262	protein_coding	0	0	0.604058	7.24179e-07	1	0	0.181343	0.180069	0	0	-0.0994302	0.795785	0
PPP1R12A	ENSG00000058272	protein_coding	1	0	0.370886	0.0484007	1	0	1.21121	4.99535e-12	1	0	1.13965	2.16463e-06	1
RASGRF1	ENSG00000058335	protein_coding	0	0	-0.63009	0.564921	0	0	0.460849	NA	0	0	-0.329587	0.842807	0
CAMK2B	ENSG00000058404	protein_coding	0	0	-0.157713	0.921564	0	0	-1.48344	0.0774023	0	0	-0.677681	0.636514	0
CROCC	ENSG00000058453	protein_coding	0	0	-0.538919	0.379251	0	0	-1.10048	0.0404888	0	1	-0.716873	0.379129	0
POLR3E	ENSG00000058600	protein_coding	0	0	0.093383	0.765597	0	0	0.0153631	0.963341	0	0	0.265856	0.507083	0
ATP2B4	ENSG00000058668	protein_coding	0	0	0.400453	0.0381954	1	0	0.297969	0.176574	0	0	0.432236	0.175278	0
ZC3H11A	ENSG00000058673	protein_coding	0	0	0.132863	0.467172	0	0	0.907224	9.02421e-13	1	0	0.905545	1.43817e-05	1
RIOK2	ENSG00000058729	protein_coding	0	0	0.311124	0.301185	0	0	0.814792	0.00711194	1	0	1.27827	0.000348627	1
YIPF1	ENSG00000058799	protein_coding	0	0	0.35774	0.632373	0	0	-0.261888	0.718295	0	0	-0.251697	0.781588	0
NDC1	ENSG00000058804	protein_coding	1	0	0.401296	0.00182666	1	0	1.15003	8.48782e-19	1	0	0.711764	0.0152259	1
DGKG	ENSG00000058866	protein_coding	0	0	-0.626831	NA	0	0	-1.264	NA	0	0	0.333946	NA	0
FLYWCH1	ENSG00000059122	protein_coding	0	0	-0.271212	0.444033	0	0	-0.474288	0.139935	0	0	-0.182275	0.749535	0
UNKL	ENSG00000059145	protein_coding	0	0	-0.493643	0.139808	0	0	0.668996	0.145541	0	0	0.386552	0.511028	0
TBXAS1	ENSG00000059377	protein_coding	0	0	-0.507026	0.644792	0	0	-1.12782	0.213122	0	0	-0.353317	0.822946	0
PARP12	ENSG00000059378	protein_coding	0	0	-2.52612	NA	0	0	-2.34575	NA	0	0	-3.44165	NA	0
ALDH18A1	ENSG00000059573	protein_coding	0	0	0.203872	0.232392	0	0	0.210386	0.146434	0	0	0.350412	0.163389	0
TARBP1	ENSG00000059588	protein_coding	0	0	-0.566449	0.00233828	0	1	-0.23012	0.337013	0	0	-0.203656	0.614165	0
GATB	ENSG00000059691	protein_coding	0	0	0.425985	0.250547	0	0	0.333357	0.429338	0	0	0.0804915	0.901428	0
MXD1	ENSG00000059728	protein_coding	0	0	0.0884503	0.909932	0	0	0.633319	0.317802	0	0	0.0242299	0.981599	0
CDK17	ENSG00000059758	protein_coding	0	0	0.323798	0.297918	0	0	1.05018	0.000150669	1	0	1.11737	0.00116762	1
DNAJC25	ENSG00000059769	protein_coding	0	0	0.125249	0.895447	0	0	-0.251633	0.750635	0	0	0.0507086	0.965758	0
SLC2A3	ENSG00000059804	protein_coding	0	0	0.995707	0.202057	0	0	0.966862	0.257944	0	0	0.524824	0.625122	0
PSD	ENSG00000059915	protein_coding	0	0	-1.8781	0.0536858	0	0	-1.76163	NA	0	0	-1.84054	0.176351	0
CTDP1	ENSG00000060069	protein_coding	0	0	-0.190098	0.831464	0	0	-0.572831	0.424737	0	0	0.239199	0.855615	0
YBX3	ENSG00000060138	protein_coding	0	0	0.0455479	0.819448	0	0	-0.003828	0.984098	0	0	0.472461	0.113781	0
STYK1	ENSG00000060140	protein_coding	0	0	-0.799347	NA	0	0	-0.743083	NA	0	0	-1.53646	NA	0
WNK1	ENSG00000060237	protein_coding	0	0	-0.220832	0.121981	0	0	-0.238764	0.0537111	0	0	-0.0791551	0.802809	0
RPS17P5	ENSG00000060303	processed_pseudogene	0	0	NA	NA	0	0	NA	NA	0	0	NA	NA	0
CCAR1	ENSG00000060339	protein_coding	0	0	-0.132719	0.550562	0	0	0.431796	0.00392919	1	0	0.519518	0.0326576	1
OGFR	ENSG00000060491	protein_coding	0	0	-0.35833	0.375189	0	0	-1.18909	5.80453e-05	0	1	-0.581419	0.366941	0
GNA15	ENSG00000060558	protein_coding	0	0	NA	NA	0	0	NA	NA	0	0	-2.91218	NA	0
CREB3L3	ENSG00000060566	protein_coding	0	0	-1.6899	NA	0	0	-0.785138	NA	0	0	-2.12641	NA	0
PIGV	ENSG00000060642	protein_coding	0	0	-0.514426	0.504834	0	0	-0.353095	0.720651	0	0	-0.87545	0.309554	0
PTPRU	ENSG00000060656	protein_coding	0	0	-0.328061	0.0504491	0	0	-0.527662	0.00133907	0	1	-0.255227	0.439828	0
SNRNP40	ENSG00000060688	protein_coding	0	0	0.704649	3.62936e-05	1	0	0.241143	0.257944	0	0	0.422622	0.154817	0
RIMBP2	ENSG00000060709	protein_coding	0	0	0.728613	NA	0	0	-1.67747	NA	0	0	-0.484287	NA	0
COL11A1	ENSG00000060718	protein_coding	0	0	-1.71461	NA	0	0	NA	NA	0	0	NA	NA	0
QSER1	ENSG00000060749	protein_coding	0	0	0.0393782	0.861631	0	0	0.636952	8.09456e-07	1	0	0.592359	0.0124331	1
MPC1	ENSG00000060762	protein_coding	0	0	0.153358	0.776184	0	0	0.0219878	0.970157	0	0	0.270729	0.663437	0
ACAA1	ENSG00000060971	protein_coding	0	0	0.0775327	0.919463	0	0	-0.570801	0.228931	0	0	-0.208941	0.793088	0
BCAT1	ENSG00000060982	protein_coding	0	0	0.161898	0.485278	0	0	0.97364	1.94598e-13	1	0	1.08461	1.98117e-05	1
HDAC7	ENSG00000061273	protein_coding	0	0	-0.151148	0.800547	0	0	-0.3502	0.552411	0	0	-0.183817	0.810043	0
LZTS1	ENSG00000061337	protein_coding	0	0	0.972075	NA	0	0	-0.138954	0.922711	0	0	-0.168511	0.924788	0
PRDM6	ENSG00000061455	protein_coding	0	0	-0.113326	0.782256	0	0	0.26901	0.500548	0	0	0.332794	0.534114	0
WNT8A	ENSG00000061492	protein_coding	0	0	NA	NA	0	0	NA	NA	0	0	-1.99497	NA	0
SPAG4	ENSG00000061656	protein_coding	0	0	-0.598372	0.616828	0	0	-0.758714	0.532391	0	0	-1.49459	0.138052	0
NCKAP1	ENSG00000061676	protein_coding	1	0	0.427523	0.000593565	1	0	1.25367	4.58073e-25	1	0	1.21527	2.57668e-08	1
MRPS35	ENSG00000061794	protein_coding	1	0	0.482052	0.0290652	1	0	0.656964	0.00965875	1	0	0.7876	0.0170547	1
GUCY1B3	ENSG00000061918	protein_coding	0	0	0.0649671	0.903338	0	0	1.14664	0.00812228	1	0	1.14517	0.0203728	1
SFSWAP	ENSG00000061936	protein_coding	0	0	-0.0969376	0.755929	0	0	-0.369063	0.112466	0	0	0.133977	0.769122	0
TNK2	ENSG00000061938	protein_coding	0	1	-1.08731	0.00403989	0	1	-1.74454	5.43262e-06	0	1	-1.29037	0.018441	0
MON2	ENSG00000061987	protein_coding	0	0	0.185926	0.373568	0	0	0.801874	1.91833e-05	1	0	0.470529	0.113524	0
CDH3	ENSG00000062038	protein_coding	0	0	0.0370292	NA	0	0	0.292677	NA	0	0	2.76269	NA	0
ARSF	ENSG00000062096	protein_coding	0	0	NA	NA	0	0	NA	NA	0	0	NA	NA	0
GPBP1	ENSG00000062194	protein_coding	1	0	0.421908	0.00411625	1	0	1.29045	2.14629e-17	1	0	1.20331	1.24834e-07	1
DGAT2	ENSG00000062282	protein_coding	0	0	-0.908595	NA	0	0	-1.70788	0.1014	0	0	-1.7599	0.123989	0
ZNF112	ENSG00000062370	protein_coding	0	0	-0.1743	0.889336	0	0	0.0987382	0.940513	0	0	0.0135206	0.992694	0
CS	ENSG00000062485	protein_coding	0	0	0.330254	0.0103771	1	0	0.306178	0.00633296	1	0	0.360729	0.130646	0
LTK	ENSG00000062524	protein_coding	0	0	-0.573922	0.640206	0	0	-1.16126	0.271422	0	0	-1.09931	0.375055	0
MRPS24	ENSG00000062582	protein_coding	0	0	-0.0982985	NA	0	0	-1.35866	NA	0	0	-1.17491	NA	0
ELMO2	ENSG00000062598	protein_coding	0	0	0.317651	0.382421	0	0	0.657088	0.0681366	0	0	0.85384	0.0410361	1
WAPL	ENSG00000062650	protein_coding	1	0	0.470741	0.000415228	1	0	1.21306	2.02675e-26	1	0	1.36547	3.24883e-12	1
VMP1	ENSG00000062716	protein_coding	1	0	0.606027	0.000441959	1	0	1.05992	6.51625e-08	1	0	1.00862	0.000176099	1
APPBP2	ENSG00000062725	protein_coding	1	0	0.484645	0.00559872	1	0	0.970471	2.50318e-07	1	0	1.22878	2.28745e-06	1
POLD1	ENSG00000062822	protein_coding	0	1	-1.00269	2.74023e-09	0	1	-0.985125	1.73045e-06	0	1	-0.807452	0.0101898	0
SEZ6	ENSG00000063015	protein_coding	0	0	-2.51845	NA	0	0	-2.15899	NA	0	0	-2.64113	NA	0
EIF4B	ENSG00000063046	protein_coding	0	0	-0.0372264	0.84022	0	0	0.903465	9.66963e-35	1	0	0.944343	6.85699e-08	1
SLC6A16	ENSG00000063127	protein_coding	0	0	-0.441311	NA	0	0	-0.229018	NA	0	0	-0.779998	0.593418	0
GLTSCR1	ENSG00000063169	protein_coding	0	0	-0.799204	0.122635	0	0	-1.27771	0.0068596	0	1	-0.954603	0.133169	0
SPHK2	ENSG00000063176	protein_coding	0	0	-0.529766	0.43686	0	0	-0.552057	0.475927	0	0	-1.00735	0.16249	0
RPL18	ENSG00000063177	protein_coding	0	1	-0.513234	2.60018e-05	0	1	-1.23068	3.37481e-43	0	1	-0.742463	0.0113534	0
CA11	ENSG00000063180	protein_coding	0	0	-0.257031	0.793959	0	0	-0.248821	0.790606	0	0	-0.289943	0.797913	0
ISOC2	ENSG00000063241	protein_coding	0	0	0.0411191	0.955334	0	0	-0.505299	0.289417	0	0	-0.170849	0.821594	0
U2AF2	ENSG00000063244	protein_coding	0	0	0.116459	0.496567	0	0	0.0562273	0.741344	0	0	0.165168	0.572039	0
EPN1	ENSG00000063245	protein_coding	0	0	-0.367427	0.0983082	0	0	-0.883345	6.37323e-06	0	1	-0.725903	0.0113299	0
MED29	ENSG00000063322	protein_coding	0	0	0.345107	0.181523	0	0	0.212663	0.44518	0	0	-0.173805	0.73959	0
AHRR	ENSG00000063438	protein_coding	0	0	0.644509	0.161591	0	0	0.143345	0.80489	0	0	0.108942	0.89511	0
GSC2	ENSG00000063515	protein_coding	0	0	-0.238821	NA	0	0	-0.704633	NA	0	0	-0.529794	NA	0
ZNF275	ENSG00000063587	protein_coding	0	0	0.530127	0.0103658	1	0	-0.118176	0.648162	0	0	-0.133571	0.783689	0
MTMR1	ENSG00000063601	protein_coding	0	0	0.347296	0.0767982	0	0	0.568273	0.00178409	1	0	0.687826	0.0093695	1
GPC1	ENSG00000063660	protein_coding	0	0	-0.388928	0.344953	0	0	-0.549974	0.176326	0	0	-0.444905	0.415416	0
ADCK1	ENSG00000063761	protein_coding	0	0	-0.325502	0.695991	0	0	-0.591478	0.452493	0	0	-0.466539	0.6408	0
HAGH	ENSG00000063854	protein_coding	0	0	-0.258107	0.684097	0	0	-0.135796	0.841555	0	0	-0.290797	0.704693	0
RNF4	ENSG00000063978	protein_coding	0	0	0.356724	0.260664	0	0	-0.0292005	0.945233	0	0	-0.161541	0.733535	0
CASP8	ENSG00000064012	protein_coding	0	0	0.0933368	0.903338	0	0	0.721309	0.280875	0	0	0.189432	0.83375	0
LIMCH1	ENSG00000064042	protein_coding	0	0	0.130132	0.810261	0	0	0.8244	0.0856054	0	0	0.913503	0.124354	0
ASUN	ENSG00000064102	protein_coding	0	0	-0.227097	0.376865	0	0	0.494925	0.064531	0	0	0.629365	0.0647159	0
TM7SF3	ENSG00000064115	protein_coding	0	0	0.0309482	0.9372	0	0	0.32819	0.276869	0	0	0.411145	0.287987	0
DLX3	ENSG00000064195	protein_coding	0	0	0.508604	NA	0	0	-0.24893	NA	0	0	-0.00931373	NA	0
SPA17	ENSG00000064199	protein_coding	0	0	-0.647184	0.490035	0	0	-0.636134	0.562319	0	0	-1.03887	0.303672	0
TSPAN32	ENSG00000064201	protein_coding	0	0	-0.526717	NA	0	0	1.54444	NA	0	0	-0.816217	NA	0
WISP2	ENSG00000064205	protein_coding	0	0	-2.99193	NA	0	0	1.6943	NA	0	0	-2.53733	NA	0
DMRT3	ENSG00000064218	protein_coding	0	0	-0.975288	NA	0	0	-0.702987	NA	0	0	0.888741	NA	0
ST3GAL6	ENSG00000064225	protein_coding	0	0	-0.586548	0.162126	0	0	0.608795	0.35929	0	0	0.137544	0.876181	0
ATP2C2	ENSG00000064270	protein_coding	0	0	-1.03399	NA	0	0	-0.502204	NA	0	0	-1.03824	NA	0
NGFR	ENSG00000064300	protein_coding	0	0	-1.92719	NA	0	0	0.691267	NA	0	0	0.365612	NA	0
CDON	ENSG00000064309	protein_coding	0	0	-0.138958	0.662236	0	0	0.519683	0.0923186	0	0	0.175355	0.738492	0
TAF2	ENSG00000064313	protein_coding	0	0	0.0142072	0.963463	0	0	0.580257	0.00184665	1	0	0.860927	0.000983406	1
HIPK2	ENSG00000064393	protein_coding	0	0	-0.0435611	0.855927	0	0	-0.0498261	0.76941	0	0	0.0787766	0.809555	0
TNPO3	ENSG00000064419	protein_coding	1	0	0.390941	0.011454	1	0	0.647743	3.63385e-05	1	0	0.680413	0.00450621	1
BORCS8-MEF2B	ENSG00000064489	protein_coding	0	0	NA	NA	0	0	NA	NA	0	0	-2.91218	NA	0
RFXANK	ENSG00000064490	protein_coding	0	0	-0.544159	0.345835	0	0	-1.39817	0.00143589	0	1	-0.903709	0.173891	0
TMEM161A	ENSG00000064545	protein_coding	0	0	-0.317315	0.360438	0	0	-0.627907	0.040596	0	1	-0.891199	0.00950074	0
LPAR2	ENSG00000064547	protein_coding	0	0	-0.256101	NA	0	0	-0.511569	NA	0	0	0.20716	0.927419	0
CTSA	ENSG00000064601	protein_coding	0	0	-0.335764	0.562308	0	0	-1.24362	0.00301154	0	1	-1.26698	0.00975206	0
SUGP2	ENSG00000064607	protein_coding	0	0	0.136143	0.588031	0	0	0.316355	0.109034	0	0	0.4127	0.159735	0
SLC12A2	ENSG00000064651	protein_coding	0	0	0.244233	0.214425	0	0	0.932684	9.91969e-08	1	0	0.795128	0.00272814	1
SNX24	ENSG00000064652	protein_coding	0	0	0.0787667	0.922016	0	0	0.787118	0.238135	0	0	0.547019	0.493464	0
EYA2	ENSG00000064655	protein_coding	0	0	-0.493191	0.529002	0	0	-0.63437	0.426724	0	0	-0.416185	0.715218	0
CNN2	ENSG00000064666	protein_coding	0	0	0.48399	0.179345	0	0	-0.194198	0.613689	0	0	-0.153836	0.775892	0
ABCA7	ENSG00000064687	protein_coding	0	0	-0.967498	0.0625553	0	0	-0.75486	0.22907	0	0	-0.964712	0.145097	0
SNCAIP	ENSG00000064692	protein_coding	0	0	-0.0096507	NA	0	0	0.826563	NA	0	0	0.311091	NA	0
DDX20	ENSG00000064703	protein_coding	1	0	0.720263	1.37815e-05	1	0	1.02124	2.97202e-08	1	0	1.14905	5.156e-06	1
BTBD1	ENSG00000064726	protein_coding	0	0	0.30149	0.0759136	0	0	0.996409	5.73775e-11	1	0	1.16248	2.91537e-06	1
FAR2	ENSG00000064763	protein_coding	0	0	0.107267	0.78163	0	0	0.454526	0.175553	0	0	0.688233	0.086447	0
BCAS1	ENSG00000064787	protein_coding	0	0	NA	NA	0	0	-3.26737	NA	0	0	-5.31195	NA	0
POU1F1	ENSG00000064835	protein_coding	0	0	-0.27345	NA	0	0	-0.38306	NA	0	0	-0.0272727	NA	0
CHI3L2	ENSG00000064886	protein_coding	0	0	-0.444148	NA	0	0	-2.61082	NA	0	0	-1.36114	NA	0
SBNO2	ENSG00000064932	protein_coding	0	0	-0.904921	0.246592	0	0	0.30248	0.81454	0	0	-0.902667	0.352164	0
PMS1	ENSG00000064933	protein_coding	0	0	0.14475	0.743937	0	0	0.842343	0.0177264	1	0	0.451014	0.333797	0
HMG20B	ENSG00000064961	protein_coding	0	0	-0.121238	0.752673	0	0	-0.623787	0.0133176	0	1	-0.0306077	0.960409	0
CALCRL	ENSG00000064989	protein_coding	0	0	0.0069151	0.996521	0	0	1.02545	0.451571	0	0	1.70855	0.247491	0
TAF11	ENSG00000064995	protein_coding	1	0	0.772387	0.0145547	1	0	0.775128	0.0301513	1	0	0.93551	0.0279128	1
ANKS1A	ENSG00000064999	protein_coding	0	0	-0.0101744	0.978758	0	0	0.333664	0.231207	0	0	0.161664	0.72031	0
AP3D1	ENSG00000065000	protein_coding	0	0	-0.187318	0.257607	0	0	-0.40605	0.00127331	0	1	0.111043	0.769491	0
ZNF76	ENSG00000065029	protein_coding	0	0	0.18317	0.692248	0	0	-0.00685461	0.990704	0	0	0.0760764	0.91758	0
SLC9A3R2	ENSG00000065054	protein_coding	0	0	-0.109843	0.848501	0	0	-0.719234	0.0636599	0	0	-0.317777	0.66091	0
NTHL1	ENSG00000065057	protein_coding	0	0	-0.567828	0.257607	0	0	-0.880848	0.0792034	0	0	-0.0726526	0.947171	0
UHRF1BP1	ENSG00000065060	protein_coding	0	0	-0.00881007	0.983509	0	0	0.206504	0.421184	0	0	0.386275	0.259013	0
GNAI3	ENSG00000065135	protein_coding	0	0	0.309902	0.0647725	0	0	0.866258	2.06815e-09	1	0	0.74401	0.0017621	1
IPO5	ENSG00000065150	protein_coding	1	0	0.468875	0.000224035	1	0	1.14837	4.44266e-54	1	0	1.28247	2.72291e-13	1
OAT	ENSG00000065154	protein_coding	0	0	0.281875	0.120989	0	0	0.814197	4.42309e-10	1	0	1.0963	2.38819e-07	1
WDR3	ENSG00000065183	protein_coding	1	0	0.687943	9.73258e-07	1	0	0.859012	3.75781e-10	1	0	1.1225	1.69417e-07	1
PKN2	ENSG00000065243	protein_coding	0	0	0.221991	0.161184	0	0	1.09547	9.54298e-15	1	0	1.1002	1.29128e-06	1
WDR18	ENSG00000065268	protein_coding	0	0	-0.251734	0.597872	0	0	-1.082	0.000464569	0	1	-0.598935	0.19284	0
TRAM2	ENSG00000065308	protein_coding	0	0	0.225755	0.637528	0	0	-0.205805	0.630738	0	0	-0.33841	0.512489	0
NTN1	ENSG00000065320	protein_coding	0	0	-0.120843	0.77693	0	0	-0.437933	0.182565	0	0	-0.107242	0.852332	0
GLP2R	ENSG00000065325	protein_coding	0	0	NA	NA	0	0	NA	NA	0	0	-2.91218	NA	0
MCM10	ENSG00000065328	protein_coding	1	0	0.775663	7.9311e-08	1	0	1.10521	6.5948e-17	1	0	1.14071	8.83501e-08	1
DGKA	ENSG00000065357	protein_coding	0	0	-0.434299	0.626953	0	0	-0.320037	0.708909	0	0	-0.228908	0.837235	0
ERBB3	ENSG00000065361	protein_coding	0	0	-0.469483	0.665458	0	0	0.16787	0.915567	0	0	-0.670816	0.593089	0
ROPN1	ENSG00000065371	protein_coding	0	0	NA	NA	0	0	NA	NA	0	0	NA	NA	0
ANKRD44	ENSG00000065413	protein_coding	0	0	-0.629231	NA	0	0	2.26851	NA	0	0	-0.108485	NA	0
KARS	ENSG00000065427	protein_coding	0	0	-0.242675	0.177551	0	0	-0.224549	0.245092	0	0	0.159003	0.68644	0
ADAT1	ENSG00000065457	protein_coding	0	0	-0.0965737	0.825651	0	0	0.427099	0.296989	0	0	0.0969615	0.882731	0
PDIA5	ENSG00000065485	protein_coding	0	0	0.337262	0.52765	0	0	-0.409228	0.398232	0	0	-0.0537792	0.947171	0
TBC1D22B	ENSG00000065491	protein_coding	0	0	0.0214314	0.974817	0	0	0.232093	0.681491	0	0	0.451549	0.483917	0
NDUFB4	ENSG00000065518	protein_coding	0	0	-0.37459	0.562308	0	0	-1.43247	1.00633e-05	0	1	-0.861569	0.110272	0
SPEN	ENSG00000065526	protein_coding	0	0	-0.329838	0.000632096	0	1	0.0491769	0.669657	0	0	0.232349	0.339507	0
MYLK	ENSG00000065534	protein_coding	0	0	0.415498	0.307309	0	0	0.212135	0.655727	0	0	-0.184922	0.752597	0
ZC3H15	ENSG00000065548	protein_coding	0	0	0.243308	0.162472	0	0	0.883326	1.64637e-08	1	0	0.996925	1.54409e-05	1
MAP2K4	ENSG00000065559	protein_coding	1	0	0.65434	0.000671541	1	0	1.39833	2.47994e-11	1	0	1.1167	0.00042843	1
TMEM206	ENSG00000065600	protein_coding	0	0	0.216781	0.582911	0	0	0.454037	0.214985	0	0	0.402243	0.396654	0
SNAP91	ENSG00000065609	protein_coding	0	0	0.418754	0.637256	0	0	1.10307	0.239013	0	0	0.672957	0.559	0
SLK	ENSG00000065613	protein_coding	0	0	0.231834	0.134134	0	0	0.695232	3.82949e-08	1	0	0.97117	3.7278e-06	1
CYB5R4	ENSG00000065615	protein_coding	0	0	0.039731	0.93314	0	0	0.959991	0.00253441	1	0	0.749434	0.0683753	0
COL17A1	ENSG00000065618	protein_coding	0	0	-1.04737	0.280632	0	0	-1.51252	0.111832	0	0	-1.97242	0.0227777	0
GSTO2	ENSG00000065621	protein_coding	0	0	-0.0486775	0.960724	0	0	-0.264291	0.734091	0	0	-0.946968	0.147259	0
SEC61A2	ENSG00000065665	protein_coding	0	0	-0.301464	0.471127	0	0	0.181313	0.737897	0	0	-0.285738	0.657881	0
PRKCQ	ENSG00000065675	protein_coding	0	0	-0.308393	0.624741	0	0	0.235778	0.766476	0	0	0.522916	0.562753	0
TLE2	ENSG00000065717	protein_coding	0	0	-0.00242012	0.998747	0	0	-0.510296	0.519043	0	0	0.0137993	0.99127	0
ASB1	ENSG00000065802	protein_coding	0	0	0.229013	0.563657	0	0	0.0364647	0.940161	0	0	-0.019498	0.976669	0
FAM107B	ENSG00000065809	protein_coding	0	0	0.289506	0.254781	0	0	1.37607	4.56441e-09	1	0	1.39688	3.95219e-06	1
ME1	ENSG00000065833	protein_coding	0	0	0.0152094	0.978131	0	0	0.668543	0.0854207	0	0	0.698282	0.2011	0
TBC1D1	ENSG00000065882	protein_coding	0	0	0.406681	0.227751	0	0	0.82148	0.0151068	1	0	0.767415	0.0531922	0
CDK13	ENSG00000065883	protein_coding	0	0	0.249214	0.195169	0	0	0.190825	0.353581	0	0	0.626955	0.0327472	1
MTHFD2	ENSG00000065911	protein_coding	0	0	0.349302	0.515715	0	0	1.10687	4.13307e-16	1	0	1.16007	1.207e-07	1
SLC9A7	ENSG00000065923	protein_coding	0	0	-0.23631	0.515169	0	0	0.196421	0.659835	0	0	0.216752	0.741778	0
FOXJ2	ENSG00000065970	protein_coding	0	0	0.142109	0.82066	0	0	-0.491327	0.259427	0	0	-0.226062	0.735418	0
YBX1	ENSG00000065978	protein_coding	0	1	-0.321202	0.00829495	0	1	-0.689646	4.51158e-22	0	1	-0.0494772	0.960763	0
PDE4A	ENSG00000065989	protein_coding	0	0	-0.282694	0.686685	0	0	-0.114115	0.893674	0	0	-0.422369	0.616157	0
PPP2R5A	ENSG00000066027	protein_coding	0	0	0.0546843	0.893589	0	0	0.543835	0.0758013	0	0	0.44436	0.270094	0
CTNNA2	ENSG00000066032	protein_coding	0	0	NA	NA	0	0	NA	NA	0	0	NA	NA	0
ELAVL1	ENSG00000066044	protein_coding	0	0	0.142069	0.547077	0	0	0.315124	0.06188	0	0	0.289858	0.305949	0
TIE1	ENSG00000066056	protein_coding	0	0	-0.96584	NA	0	0	-1.33599	NA	0	0	-1.19071	NA	0
DIP2B	ENSG00000066084	protein_coding	0	0	0.221189	0.245001	0	0	0.915169	1.5619e-08	1	0	0.842743	0.000435845	1
SMARCD1	ENSG00000066117	protein_coding	0	0	-0.313179	0.115698	0	0	-0.641699	0.000412772	0	1	-0.416363	0.16637	0
KDM4A	ENSG00000066135	protein_coding	0	0	-0.158492	0.63752	0	0	0.306833	0.248629	0	0	0.437553	0.227698	0
NFYC	ENSG00000066136	protein_coding	0	0	-0.0406096	0.94562	0	0	-0.774172	0.021116	0	1	-0.264614	0.657121	0
ZMYND12	ENSG00000066185	protein_coding	0	0	-0.285578	NA	0	0	-0.733045	NA	0	0	-2.99193	NA	0
SLC9A3	ENSG00000066230	protein_coding	0	0	-1.71358	NA	0	0	-1.95355	NA	0	0	-1.36537	NA	0
NGEF	ENSG00000066248	protein_coding	0	0	0.040932	0.963463	0	0	-0.342826	0.57167	0	0	-0.213375	0.806652	0
ASPM	ENSG00000066279	protein_coding	0	0	-0.287705	0.026016	0	0	0.222385	0.098136	0	0	0.503918	0.028438	1
CD84	ENSG00000066294	protein_coding	0	0	NA	NA	0	0	NA	NA	0	0	-2.13227	NA	0
ELOVL1	ENSG00000066322	protein_coding	0	0	-0.181008	0.772907	0	0	-0.712905	0.118499	0	0	-1.21181	0.0137653	0
SPI1	ENSG00000066336	protein_coding	0	0	-0.295319	NA	0	0	0.250664	NA	0	0	-0.645821	NA	0
ZNRD1	ENSG00000066379	protein_coding	0	0	0.669635	NA	0	0	2.28842	NA	0	0	0.936411	NA	0
MPPED2	ENSG00000066382	protein_coding	0	0	-0.394214	0.628395	0	0	0.228051	0.811583	0	0	0.101227	0.936608	0
CLDN18	ENSG00000066405	protein_coding	0	0	-2.1445	NA	0	0	-1.57935	NA	0	0	-2.83394	0.049358	0
ZBTB11	ENSG00000066422	protein_coding	0	0	0.375618	0.126191	0	0	1.11481	1.04504e-06	1	0	1.30404	8.30843e-06	1
ATXN3	ENSG00000066427	protein_coding	0	0	-0.113975	0.76185	0	0	0.437144	0.214164	0	0	0.1529	0.776358	0
GOLGA5	ENSG00000066455	protein_coding	0	0	0.0638829	0.881662	0	0	0.540612	0.0840974	0	0	0.998682	0.00902705	1
FGFR2	ENSG00000066468	protein_coding	0	0	-0.0926287	0.773186	0	0	0.647663	0.0118978	1	0	0.7464	0.0236637	1
LRRC40	ENSG00000066557	protein_coding	0	0	0.228853	0.302386	0	0	1.04424	2.04804e-06	1	0	0.824835	0.00726675	1
ISOC1	ENSG00000066583	protein_coding	0	0	0.397876	0.103133	0	0	0.732521	0.00226169	1	0	0.524264	0.115223	0
EML1	ENSG00000066629	protein_coding	0	0	0.393399	0.16769	0	0	0.641667	0.0219764	1	0	0.996817	0.00384341	1
TRMT11	ENSG00000066651	protein_coding	0	0	-0.466788	0.0973245	0	0	0.087452	0.848697	0	0	0.304432	0.567836	0
THUMPD1	ENSG00000066654	protein_coding	1	0	0.565425	0.000448346	1	0	1.04868	1.46872e-08	1	0	1.32392	2.02977e-07	1
MSANTD3	ENSG00000066697	protein_coding	0	0	0.0308539	0.967394	0	0	0.0923053	0.88618	0	0	0.401738	0.572149	0
KIF26A	ENSG00000066735	protein_coding	0	0	-0.417042	0.202516	0	0	-0.347514	0.28252	0	0	-0.100605	0.867461	0
ATG2B	ENSG00000066739	protein_coding	0	0	-0.0459452	0.86671	0	0	0.918149	1.15889e-06	1	0	0.628969	0.0308344	1
ARFGEF1	ENSG00000066777	protein_coding	0	0	-0.023844	0.943806	0	0	0.692103	0.000437855	1	0	0.698113	0.0130881	1
ACSM2B	ENSG00000066813	protein_coding	0	0	NA	NA	0	0	NA	NA	0	0	NA	NA	0
ZFAT	ENSG00000066827	protein_coding	0	0	-0.713648	0.134134	0	0	-1.18371	0.0157403	0	1	-0.587742	0.447262	0
MTFR1	ENSG00000066855	protein_coding	1	0	0.438057	0.0177026	1	0	1.2337	2.43143e-09	1	0	1.27773	3.53721e-06	1
STAG3	ENSG00000066923	protein_coding	0	0	-1.64462	NA	0	0	-1.57347	NA	0	0	-1.78587	0.219715	0
FECH	ENSG00000066926	protein_coding	0	0	0.263073	0.29735	0	0	0.794433	0.00121039	1	0	0.765598	0.0176491	1
MYO9A	ENSG00000066933	protein_coding	0	0	0.173223	0.407203	0	0	1.05142	5.68533e-10	1	0	0.871257	0.000417141	1
DDX3Y	ENSG00000067048	protein_coding	0	0	NA	NA	0	0	NA	NA	0	0	NA	NA	0
PFKP	ENSG00000067057	protein_coding	0	0	-0.185519	0.530991	0	0	-0.377133	0.148	0	0	-0.119803	0.829785	0
IDI1	ENSG00000067064	protein_coding	1	0	1.29876	3.74012e-15	1	0	1.11525	4.7661e-11	1	0	1.69289	4.3367e-13	1
SP100	ENSG00000067066	protein_coding	0	0	0.434999	NA	0	0	-0.81331	NA	0	0	0.841819	NA	0
KLF6	ENSG00000067082	protein_coding	0	0	-0.0593775	0.891955	0	0	0.631346	0.0557205	0	0	1.00361	0.0113481	1
PLPP1	ENSG00000067113	protein_coding	0	0	0.0338421	0.978758	0	0	-0.293565	0.757692	0	0	-0.1498	0.909474	0
NEO1	ENSG00000067141	protein_coding	0	0	-0.0563589	0.855927	0	0	0.019971	0.949182	0	0	0.207572	0.575828	0
TRAM1	ENSG00000067167	protein_coding	0	0	0.454128	0.000656508	1	0	0.71316	1.89847e-07	1	0	0.506996	0.0814264	0
PHKA1	ENSG00000067177	protein_coding	0	0	0.303427	0.181387	0	0	0.718969	0.00142105	1	0	0.865223	0.00338386	1
TNFRSF1A	ENSG00000067182	protein_coding	0	0	-0.899316	0.033588	0	1	-0.761582	0.167305	0	0	-0.826424	0.168195	0
CACNB1	ENSG00000067191	protein_coding	0	0	-0.484393	0.715327	0	0	-0.920364	0.427217	0	0	-0.609886	0.702134	0
EVI5	ENSG00000067208	protein_coding	0	0	0.0427511	0.894569	0	0	0.933818	4.63899e-05	1	0	1.04788	0.000292964	1
STOML1	ENSG00000067221	protein_coding	0	0	-0.0609487	0.961522	0	0	-0.323373	0.755723	0	0	-0.608535	0.56789	0
PKM	ENSG00000067225	protein_coding	0	0	-0.248798	0.105924	0	0	-0.159076	0.0331457	0	0	0.171232	0.522861	0
DHX29	ENSG00000067248	protein_coding	0	0	0.165921	0.60237	0	0	0.957468	8.00572e-06	1	0	1.03531	0.000336242	1
DNTTIP2	ENSG00000067334	protein_coding	1	0	0.756109	4.93257e-07	1	0	0.751368	1.41902e-06	1	0	1.12769	1.24993e-06	1
METTL22	ENSG00000067365	protein_coding	0	0	-0.310766	0.637256	0	0	-0.382975	0.564539	0	0	-0.562454	0.45038	0
TP53BP1	ENSG00000067369	protein_coding	0	0	0.265537	0.186513	0	0	1.02193	1.28211e-08	1	0	0.984656	8.11963e-05	1
TRO	ENSG00000067445	protein_coding	0	0	0.539416	0.0683658	0	0	0.316117	0.341891	0	0	0.472664	0.249723	0
RRP15	ENSG00000067533	protein_coding	1	0	0.520485	0.00218912	1	0	0.716628	5.55442e-05	1	0	0.853675	0.00102912	1
RHOA	ENSG00000067560	protein_coding	0	0	-0.235083	0.104068	0	0	0.137727	0.203421	0	0	0.144679	0.60278	0
DHX8	ENSG00000067596	protein_coding	1	0	0.530579	0.00046771	1	0	0.637479	1.64271e-05	1	0	0.821304	0.000345166	1
PMS2P4	ENSG00000067601	transcribed_unprocessed_pseudogene	0	0	-0.25221	NA	0	0	0.417706	NA	0	0	0.272299	NA	0
PRKCZ	ENSG00000067606	protein_coding	0	0	-0.714443	0.236002	0	0	-0.935794	0.149698	0	0	-0.472541	0.65534	0
ZFY	ENSG00000067646	protein_coding	0	0	NA	NA	0	0	NA	NA	0	0	NA	NA	0
IARS2	ENSG00000067704	protein_coding	1	0	0.338086	0.0127371	1	0	0.987543	2.13994e-22	1	0	1.21961	1.40038e-10	1
SYT1	ENSG00000067715	protein_coding	0	0	-0.073316	0.924084	0	0	0.464021	0.52074	0	0	1.04276	0.172486	0
NAV3	ENSG00000067798	protein_coding	0	0	-0.317875	NA	0	0	-0.711044	NA	0	0	-0.288076	NA	0
IDH3G	ENSG00000067829	protein_coding	0	0	-0.342301	0.341944	0	0	-0.91069	0.00112916	0	1	-0.728202	0.096927	0
ROGDI	ENSG00000067836	protein_coding	0	0	-0.227608	0.791233	0	0	-1.02342	0.0883459	0	0	-0.819914	0.282258	0
PDZD4	ENSG00000067840	protein_coding	0	0	0.404983	0.46731	0	0	-0.454118	0.374771	0	0	0.151414	0.857003	0
ATP2B3	ENSG00000067842	protein_coding	0	0	0.00825993	NA	0	0	-1.27418	0.254029	0	0	-1.45514	0.21582	0
ROCK1	ENSG00000067900	protein_coding	0	0	-0.023623	0.924487	0	0	0.762817	1.5526e-07	1	0	0.892516	8.31269e-05	1
CBFB	ENSG00000067955	protein_coding	0	0	0.132191	0.593975	0	0	1.02643	3.76296e-08	1	0	1.00976	0.000126508	1
PDK3	ENSG00000067992	protein_coding	0	0	-0.0975746	0.85175	0	0	0.00259483	0.996937	0	0	-0.0725957	0.92324	0
HYAL2	ENSG00000068001	protein_coding	0	0	0.139503	0.856097	0	0	-0.0319255	0.968643	0	0	-0.223582	0.791402	0
HDAC4	ENSG00000068024	protein_coding	0	0	0.195988	0.684352	0	0	0.068249	0.89548	0	0	0.333625	0.562753	0
RASSF1	ENSG00000068028	protein_coding	0	0	0.0861475	0.92307	0	0	-0.624134	0.292502	0	0	-0.211592	0.823815	0
FGFR3	ENSG00000068078	protein_coding	0	0	-0.18975	0.502527	0	0	0.0737463	0.82963	0	0	0.450996	0.236555	0
IFI35	ENSG00000068079	protein_coding	0	0	-0.0619319	0.967788	0	0	-0.465308	0.703141	0	0	-0.694548	0.58722	0
HEATR6	ENSG00000068097	protein_coding	0	0	0.00495181	0.992727	0	0	0.128714	0.736515	0	0	0.43096	0.322349	0
COASY	ENSG00000068120	protein_coding	0	1	-0.488209	0.0313131	0	1	-0.573058	0.023331	0	1	-0.375734	0.34595	0
PLEKHH3	ENSG00000068137	protein_coding	0	0	-0.69002	0.125338	0	0	-0.779708	0.119511	0	0	-0.749602	0.206615	0
MEF2A	ENSG00000068305	protein_coding	1	0	0.511857	0.00466699	1	0	1.16616	8.2047e-09	1	0	1.37094	3.04878e-06	1
OTUD5	ENSG00000068308	protein_coding	0	0	-0.0966149	0.768103	0	0	-0.470247	0.039991	0	1	-0.099971	0.829383	0
TFE3	ENSG00000068323	protein_coding	0	0	-0.275771	0.660352	0	0	-0.683943	0.148463	0	0	-0.600538	0.340469	0
TBC1D25	ENSG00000068354	protein_coding	0	0	0.046073	0.952223	0	0	-0.333404	0.566956	0	0	-0.144712	0.859738	0
ACSL4	ENSG00000068366	protein_coding	1	0	0.477175	0.0016739	1	0	1.34507	2.25127e-15	1	0	1.43013	5.23709e-09	1
INPP5A	ENSG00000068383	protein_coding	0	0	0.089992	0.829772	0	0	-0.0400338	0.925104	0	0	0.329413	0.491283	0
GPKOW	ENSG00000068394	protein_coding	0	0	-0.275768	0.56783	0	0	-0.548197	0.181499	0	0	-0.0508513	0.950136	0
GRIPAP1	ENSG00000068400	protein_coding	0	1	-0.852918	0.00910315	0	1	-1.15183	0.00146619	0	1	-0.946509	0.0473629	0
FTSJ1	ENSG00000068438	protein_coding	0	0	0.320716	0.377314	0	0	-0.108	0.796615	0	0	0.265115	0.636487	0
PRR11	ENSG00000068489	protein_coding	0	0	0.478089	0.0921543	0	0	0.582245	0.0602668	0	0	0.523802	0.193436	0
REEP1	ENSG00000068615	protein_coding	0	0	0.569131	0.187263	0	0	0.77647	0.0840256	0	0	0.883473	0.0940013	0
ATP11A	ENSG00000068650	protein_coding	0	0	0.478488	0.0686984	0	0	0.168684	0.60141	0	0	0.246127	0.563134	0
POLR1A	ENSG00000068654	protein_coding	0	0	0.211598	0.208613	0	0	0.121154	0.435841	0	0	0.182801	0.519637	0
LAPTM4A	ENSG00000068697	protein_coding	0	0	0.277695	0.319271	0	0	0.332892	0.165353	0	0	-0.0167976	0.972402	0
TTC7A	ENSG00000068724	protein_coding	0	0	-0.190606	0.751788	0	0	0.0418003	0.956813	0	0	-0.147607	0.857989	0
IP6K2	ENSG00000068745	protein_coding	0	0	0.267327	0.474152	0	0	-0.300949	0.40273	0	0	0.101219	0.854992	0
STON1-GTF2A1L	ENSG00000068781	protein_coding	0	0	1.45006	NA	0	0	1.6943	NA	0	0	0.333946	NA	0
SRBD1	ENSG00000068784	protein_coding	0	0	-0.114747	0.751326	0	0	0.335878	0.273809	0	0	0.696642	0.0570448	0
KIF2A	ENSG00000068796	protein_coding	0	0	0.255882	0.126191	0	0	1.21603	1.2177e-14	1	0	1.26	4.87054e-08	1
RASGRP2	ENSG00000068831	protein_coding	0	0	-1.11629	0.331992	0	0	-1.86287	0.0595614	0	0	-2.23823	0.0202652	0
PSME4	ENSG00000068878	protein_coding	0	0	0.0968239	0.65693	0	0	0.681617	1.02764e-06	1	0	0.814536	0.000345166	1
IFT80	ENSG00000068885	protein_coding	0	0	-0.0698053	0.924172	0	0	0.654691	0.270043	0	0	0.308707	0.699713	0
SIRT2	ENSG00000068903	protein_coding	0	0	NA	NA	0	0	NA	NA	0	0	NA	NA	0
ERLEC1	ENSG00000068912	protein_coding	1	0	0.564611	0.0172235	1	0	1.20095	1.75385e-05	1	0	1.28398	0.000186081	1
PPP2R5B	ENSG00000068971	protein_coding	0	0	0.0433501	0.965153	0	0	-0.534619	0.461745	0	0	-0.145384	0.893742	0
PYGM	ENSG00000068976	protein_coding	0	0	-0.440248	0.676524	0	0	-1.35587	0.0874844	0	0	-1.20989	0.195612	0
PAGE1	ENSG00000068985	protein_coding	0	0	NA	NA	0	0	NA	NA	0	0	NA	NA	0
PITX1	ENSG00000069011	protein_coding	0	0	0.263753	0.379895	0	0	-0.185917	0.569842	0	0	-0.0292398	0.957556	0
TRPC7	ENSG00000069018	protein_coding	0	0	-0.893785	NA	0	0	-1.17628	NA	0	0	-1.26459	NA	0
MAST4	ENSG00000069020	protein_coding	0	0	-0.663153	0.119074	0	0	0.361016	0.612098	0	0	-0.0133779	0.989355	0
ADGRF5	ENSG00000069122	protein_coding	0	0	-1.71461	NA	0	0	NA	NA	0	0	NA	NA	0
SDK2	ENSG00000069188	protein_coding	0	0	-0.32599	0.288255	0	0	-0.788106	0.000654368	0	1	-0.378298	0.385787	0
ADAM7	ENSG00000069206	protein_coding	0	0	NA	NA	0	0	NA	NA	0	0	NA	NA	0
NUP133	ENSG00000069248	protein_coding	1	0	0.384994	0.00728793	1	0	0.785177	1.65037e-12	1	0	0.725172	0.000916006	1
NUCKS1	ENSG00000069275	protein_coding	0	0	0.124864	0.290945	0	0	0.740002	1.64303e-33	1	0	0.705735	0.000869884	1
VPS35	ENSG00000069329	protein_coding	0	0	0.200496	0.292462	0	0	0.903699	1.88486e-09	1	0	1.09208	1.29156e-06	1
DNAJA2	ENSG00000069345	protein_coding	1	0	0.462881	0.00102485	1	0	0.982684	3.53658e-12	1	0	1.14534	2.09436e-07	1
BCL3	ENSG00000069399	protein_coding	0	0	-0.853689	NA	0	0	-0.7125	NA	0	0	-0.77891	NA	0
KCNAB2	ENSG00000069424	protein_coding	0	0	0.665292	0.22978	0	0	0.56309	0.370932	0	0	0.539561	0.472992	0
ABCC9	ENSG00000069431	protein_coding	0	0	0.174737	NA	0	0	-0.0101884	NA	0	0	1.47939	NA	0
GAL	ENSG00000069482	protein_coding	0	0	0.145975	0.781006	0	0	-0.736846	0.0305101	0	1	-0.234824	0.739277	0
CLEC2D	ENSG00000069493	protein_coding	0	0	-0.648468	0.597018	0	0	-0.197941	NA	0	0	-0.601181	0.708597	0
FUNDC1	ENSG00000069509	protein_coding	0	0	0.479816	0.324207	0	0	0.512457	0.263832	0	0	0.896731	0.10338	0
MAOB	ENSG00000069535	protein_coding	0	0	0.114367	NA	0	0	-1.5093	NA	0	0	-0.805423	NA	0
RORA	ENSG00000069667	protein_coding	0	0	-0.264436	0.623803	0	0	0.216414	0.727166	0	0	0.360471	0.637209	0
DRD4	ENSG00000069696	protein_coding	0	0	-1.71461	NA	0	0	-2.25388	NA	0	0	NA	NA	0
TGFBR3	ENSG00000069702	protein_coding	0	0	-0.0698139	0.844317	0	0	0.812089	0.00294792	1	0	0.818721	0.0176348	1
KIAA1107	ENSG00000069712	protein_coding	0	0	NA	NA	0	0	NA	NA	0	0	NA	NA	0
PLA2G10	ENSG00000069764	protein_coding	0	0	NA	NA	0	0	NA	NA	0	0	NA	NA	0
HES2	ENSG00000069812	protein_coding	0	0	-2.46021	NA	0	0	-0.733045	NA	0	0	-0.562807	NA	0
ATP1B3	ENSG00000069849	protein_coding	0	0	0.201824	0.327549	0	0	0.579173	0.00091383	1	0	0.784274	0.00215987	1
NEDD4	ENSG00000069869	protein_coding	0	0	0.222552	0.554843	0	0	1.33628	0.000291313	1	0	1.83035	2.15346e-05	1
PIGB	ENSG00000069943	protein_coding	0	0	-0.320101	0.800399	0	0	-0.721748	0.529531	0	0	-0.687471	0.60194	0
MAPK6	ENSG00000069956	protein_coding	1	0	0.738202	1.28461e-05	1	0	1.38997	5.08296e-13	1	0	1.37428	4.29355e-07	1
GNB5	ENSG00000069966	protein_coding	0	0	-0.59124	0.259993	0	0	0.11573	0.892021	0	0	-0.644372	0.38723	0
RAB27A	ENSG00000069974	protein_coding	0	0	0.880187	0.26894	0	0	1.28571	0.120255	0	0	1.33533	0.155307	0
CECR5	ENSG00000069998	protein_coding	0	0	-0.262959	0.459304	0	0	-0.805928	0.0015156	0	1	-0.345116	0.469818	0
UFD1L	ENSG00000070010	protein_coding	0	0	-0.449438	0.249372	0	0	-0.226037	0.666658	0	0	-0.236517	0.726522	0
LRP6	ENSG00000070018	protein_coding	0	0	NA	NA	0	0	NA	NA	0	0	NA	NA	0
GUCY2C	ENSG00000070019	protein_coding	0	0	NA	NA	0	0	NA	NA	0	0	NA	NA	0
SCT	ENSG00000070031	protein_coding	0	0	0.485005	NA	0	0	0.71582	NA	0	0	0.876362	NA	0
PHRF1	ENSG00000070047	protein_coding	0	0	-0.139968	NA	0	0	-0.337734	NA	0	0	-1.59233	0.390446	0
IKBKAP	ENSG00000070061	protein_coding	1	0	0.431465	0.00314639	1	0	0.841966	5.04611e-10	1	0	1.00368	3.31203e-06	1
NUCB2	ENSG00000070081	protein_coding	0	0	0.136891	0.708855	0	0	0.31307	0.347572	0	0	0.993014	0.00864301	1
PFN2	ENSG00000070087	protein_coding	0	0	0.1841	0.348123	0	0	0.435835	0.0102738	1	0	0.212252	0.564541	0
PTPN3	ENSG00000070159	protein_coding	0	0	0.0977411	0.785	0	0	0.871567	0.00224281	1	0	0.873487	0.0137653	1
SPTB	ENSG00000070182	protein_coding	0	0	-0.348427	0.513397	0	0	-0.558534	0.275102	0	0	-0.04174	0.965403	0
DAPP1	ENSG00000070190	protein_coding	0	0	-0.187571	NA	0	0	-0.424436	NA	0	0	-0.33079	0.876055	0
FGF10	ENSG00000070193	protein_coding	0	0	NA	NA	0	0	NA	NA	0	0	NA	NA	0
SLC44A1	ENSG00000070214	protein_coding	0	0	0.257141	0.24104	0	0	0.957106	3.65612e-07	1	0	0.759964	0.00724324	1
TMEM260	ENSG00000070269	protein_coding	0	0	0.123507	0.841478	0	0	0.357748	0.546473	0	0	0.520817	0.450623	0
SMG6	ENSG00000070366	protein_coding	0	0	0.0197167	0.966811	0	0	-0.134743	0.704347	0	0	0.246166	0.608447	0
EXOC5	ENSG00000070367	protein_coding	0	0	0.308115	0.050114	0	0	1.08449	1.10324e-11	1	0	0.993856	3.38032e-05	1
CLTCL1	ENSG00000070371	protein_coding	0	0	-0.646364	0.0199205	0	1	-0.202052	0.654085	0	0	-0.125977	0.842327	0
FGF22	ENSG00000070388	protein_coding	0	0	1.63217	NA	0	0	-0.200631	NA	0	0	-0.356324	NA	0
FSTL3	ENSG00000070404	protein_coding	0	0	0.0669321	0.959483	0	0	0.116294	0.924149	0	0	0.196003	0.89655	0
DGCR2	ENSG00000070413	protein_coding	0	0	-0.00239953	0.994973	0	0	0.0887285	0.726679	0	0	0.11872	0.763767	0
RNF126	ENSG00000070423	protein_coding	0	0	0.510019	0.0463263	1	0	-0.144255	0.632146	0	0	-0.0477017	0.925048	0
MNT	ENSG00000070444	protein_coding	0	0	-0.557242	0.183681	0	0	-0.615425	0.14865	0	0	-0.457728	0.424611	0
ZXDC	ENSG00000070476	protein_coding	0	0	-0.193187	0.634716	0	0	-0.504699	0.112322	0	0	-0.172807	0.750292	0
JMJD6	ENSG00000070495	protein_coding	0	0	0.343183	0.394631	0	0	-0.260058	0.543183	0	0	-0.345286	0.487745	0
POLB	ENSG00000070501	protein_coding	0	0	-0.0420963	0.941492	0	0	0.597876	0.181989	0	0	0.730671	0.16323	0
ST6GALNAC1	ENSG00000070526	protein_coding	0	0	1.03644	NA	0	0	1.23578	NA	0	0	-0.257597	NA	0
WIPI1	ENSG00000070540	protein_coding	0	0	-0.14335	0.91756	0	0	-0.195043	0.879137	0	0	-0.099925	0.95321	0
FRMPD1	ENSG00000070601	protein_coding	0	0	-0.140334	NA	0	0	0.279664	NA	0	0	0.98982	NA	0
GBA2	ENSG00000070610	protein_coding	0	0	-0.37814	0.23027	0	0	-0.0839733	0.848266	0	0	-0.0263172	0.966052	0
NDST1	ENSG00000070614	protein_coding	0	0	0.0691942	0.838405	0	0	-0.486753	0.0144101	0	1	-0.329335	0.319772	0
ASNS	ENSG00000070669	protein_coding	0	0	0.3062	0.20659	0	0	0.70884	2.91066e-07	1	0	0.792303	0.000345166	1
AP3M2	ENSG00000070718	protein_coding	0	0	-0.295594	0.351144	0	0	0.403694	0.29937	0	0	0.310712	0.544917	0
CNGB1	ENSG00000070729	protein_coding	0	0	-2.35973	NA	0	0	-3.19308	NA	0	0	NA	NA	0
ST6GALNAC2	ENSG00000070731	protein_coding	0	0	-0.221858	0.855517	0	0	-0.156595	0.898707	0	0	-0.920184	0.34317	0
CHAT	ENSG00000070748	protein_coding	0	0	-1.71461	NA	0	0	NA	NA	0	0	NA	NA	0
PABPC1	ENSG00000070756	protein_coding	0	0	0.109473	0.574926	0	0	0.20051	0.00586061	0	0	0.364651	0.0732891	0
TESK2	ENSG00000070759	protein_coding	0	0	-0.101556	0.892923	0	0	0.526741	0.463208	0	0	0.397629	0.653507	0
CFAP20	ENSG00000070761	protein_coding	0	0	0.7443	0.0228504	1	0	0.113913	0.791098	0	0	0.777878	0.110138	0
CSNK2A2	ENSG00000070770	protein_coding	0	0	0.26477	0.177039	0	0	0.484045	0.0028592	1	0	0.513238	0.0555446	0
PTPN21	ENSG00000070778	protein_coding	0	0	0.177613	0.760727	0	0	0.0454919	0.945442	0	0	0.711144	0.267576	0
EIF2B3	ENSG00000070785	protein_coding	0	0	0.112075	0.823547	0	0	-0.266095	0.526092	0	0	0.0126766	0.98579	0
CAMK2A	ENSG00000070808	protein_coding	0	0	NA	NA	0	0	NA	NA	0	0	NA	NA	0
TCOF1	ENSG00000070814	protein_coding	0	0	-0.185963	0.299473	0	0	-0.233587	0.0676741	0	0	0.180644	0.644571	0
CDC42	ENSG00000070831	protein_coding	0	0	-0.0770864	0.68468	0	0	0.724711	7.51588e-08	1	0	0.504533	0.0734818	0
OSBPL3	ENSG00000070882	protein_coding	0	0	0.374218	0.154455	0	0	0.693346	0.0143161	1	0	0.601802	0.104977	0
EPHA8	ENSG00000070886	protein_coding	0	0	0.0779272	0.943631	0	0	-0.384028	0.657134	0	0	-0.26855	0.813085	0
SLC12A3	ENSG00000070915	protein_coding	0	0	0.956833	NA	0	0	-0.301381	NA	0	0	-1.88297	NA	0
RAD18	ENSG00000070950	protein_coding	0	0	0.117224	0.713044	0	0	0.514492	0.107263	0	0	0.479835	0.21577	0
ATP2B1	ENSG00000070961	protein_coding	0	0	-0.131526	0.50146	0	0	1.04492	2.78882e-10	1	0	1.15621	1.06215e-06	1
TRPM5	ENSG00000070985	protein_coding	0	0	-0.132449	NA	0	0	-1.22737	NA	0	0	-1.43389	NA	0
NCK2	ENSG00000071051	protein_coding	0	0	-0.108224	0.839665	0	0	-0.285725	0.549151	0	0	0.0918433	0.904881	0
MAP4K4	ENSG00000071054	protein_coding	0	0	0.0276566	0.916005	0	0	0.239602	0.120952	0	0	0.447585	0.0847534	0
MGAT4A	ENSG00000071073	protein_coding	0	0	-0.095171	0.834596	0	0	0.981155	0.0136157	1	0	0.449825	0.392842	0
RPL31	ENSG00000071082	protein_coding	0	0	-0.14619	0.498913	0	0	-1.24715	1.91216e-36	0	1	-0.699614	0.00643928	0
WDR1	ENSG00000071127	protein_coding	0	0	0.139857	0.556015	0	0	-0.0270981	0.909681	0	0	0.168178	0.653999	0
SNX13	ENSG00000071189	protein_coding	0	0	0.102895	0.740219	0	0	1.01741	5.23896e-05	1	0	0.790157	0.0148454	1
MS4A12	ENSG00000071203	protein_coding	0	0	NA	NA	0	0	NA	NA	0	0	NA	NA	0
ARHGAP10	ENSG00000071205	protein_coding	0	0	-0.437428	0.271438	0	0	0.159208	0.785262	0	0	0.206211	0.794218	0
RPS6KA2	ENSG00000071242	protein_coding	0	0	-0.131139	0.806093	0	0	-0.26875	0.546453	0	0	-0.321171	0.555662	0
ING3	ENSG00000071243	protein_coding	0	0	0.343439	0.28978	0	0	0.781827	0.0180619	1	0	0.935964	0.0167369	1
VASH1	ENSG00000071246	protein_coding	0	0	0.0941625	0.854143	0	0	-0.190137	0.644987	0	0	-0.221467	0.675767	0
LMCD1	ENSG00000071282	protein_coding	0	0	0.526023	0.641065	0	0	-0.554872	0.583553	0	0	-0.0612878	0.968179	0
WBSCR22	ENSG00000071462	protein_coding	0	0	-0.0384099	0.927601	0	0	-0.241609	0.394028	0	0	0.00381933	0.99389	0
SEL1L	ENSG00000071537	protein_coding	1	0	0.563495	0.000543581	1	0	1.20864	6.56617e-11	1	0	1.0935	8.37839e-05	1
TRIP13	ENSG00000071539	protein_coding	0	0	0.307174	0.201656	0	0	0.245465	0.345023	0	0	0.408916	0.229052	0
ATP6AP1	ENSG00000071553	protein_coding	0	0	-0.283177	0.22793	0	0	-0.772866	2.12507e-05	0	1	-0.6619	0.0196822	0
TCF3	ENSG00000071564	protein_coding	0	0	0.214939	0.32909	0	0	-0.269861	0.161425	0	0	-0.0498573	0.914368	0
TRIB2	ENSG00000071575	protein_coding	0	0	0.141031	0.834596	0	0	0.3832	0.481156	0	0	0.503858	0.428309	0
DAZAP1	ENSG00000071626	protein_coding	0	0	-0.230119	0.289601	0	0	-0.494709	0.00287953	0	1	-0.218831	0.512759	0
MBD3	ENSG00000071655	protein_coding	0	0	0.253809	0.365709	0	0	-0.274379	0.272311	0	0	-0.23895	0.522286	0
PRLH	ENSG00000071677	protein_coding	0	0	NA	NA	0	0	NA	NA	0	0	NA	NA	0
HLTF	ENSG00000071794	protein_coding	0	0	0.136763	0.412476	0	0	0.955824	3.45846e-13	1	0	1.3752	2.48993e-11	1
FAM50A	ENSG00000071859	protein_coding	0	1	-0.615095	0.010806	0	1	-1.24257	9.97794e-09	0	1	-0.682793	0.0801464	0
FAM3A	ENSG00000071889	protein_coding	0	0	-0.0445553	0.93052	0	0	-0.325947	0.387904	0	0	-0.169176	0.765062	0
CPSF1	ENSG00000071894	protein_coding	0	1	-0.442888	0.0150129	0	1	-0.722495	4.28742e-05	0	1	-0.504731	0.12636	0
MYO3B	ENSG00000071909	protein_coding	0	0	NA	NA	0	0	NA	NA	0	0	NA	NA	0
CYBRD1	ENSG00000071967	protein_coding	0	0	-0.279107	0.766273	0	0	0.0571663	0.962133	0	0	0.059837	0.966624	0
CDH19	ENSG00000071991	protein_coding	0	0	NA	NA	0	0	NA	NA	0	0	NA	NA	0
PDCD2	ENSG00000071994	protein_coding	0	0	0.10845	0.67431	0	0	0.19966	0.364124	0	0	0.571903	0.0447511	1
SLC6A15	ENSG00000072041	protein_coding	0	0	0.106635	0.629855	0	0	0.606709	0.000128753	1	0	0.7379	0.00240263	1
RDH11	ENSG00000072042	protein_coding	0	0	0.449806	0.0551195	0	0	0.502162	0.0305929	1	0	0.860401	0.0056178	1
PRKACA	ENSG00000072062	protein_coding	0	0	-0.198223	0.551943	0	0	-0.572273	0.0360883	0	1	-0.595477	0.0882684	0
ADGRL1	ENSG00000072071	protein_coding	0	0	-0.0629396	0.829772	0	0	-0.597408	0.000726863	0	1	-0.561862	0.0391823	0
SPP2	ENSG00000072080	protein_coding	0	0	NA	NA	0	0	NA	NA	0	0	NA	NA	0
ACTN1	ENSG00000072110	protein_coding	0	0	-0.0448884	0.909932	0	0	-0.5205	0.0130073	0	1	-0.289365	0.443489	0
ZFYVE26	ENSG00000072121	protein_coding	0	0	-0.0707438	0.816127	0	0	0.398927	0.121061	0	0	0.466171	0.168843	0
RPS6KA6	ENSG00000072133	protein_coding	0	0	0.221904	0.557454	0	0	1.2318	0.000318899	1	0	0.944134	0.0205636	1
EPN2	ENSG00000072134	protein_coding	0	0	-0.0939945	0.834596	0	0	0.182648	0.665325	0	0	-0.119049	0.84101	0
PTPN18	ENSG00000072135	protein_coding	0	0	-0.158732	0.719042	0	0	-0.476261	0.193472	0	0	-0.333968	0.519529	0
LIMS2	ENSG00000072163	protein_coding	0	0	-1.28651	NA	0	0	-2.15298	NA	0	0	-1.92807	0.241291	0
ASIC4	ENSG00000072182	protein_coding	0	0	-1.47783	NA	0	0	-1.74498	NA	0	0	-2.66911	0.0430778	0
SPEG	ENSG00000072195	protein_coding	0	0	-0.305834	0.615001	0	0	-0.201788	0.759921	0	0	0.0188356	0.98579	0
LNX1	ENSG00000072201	protein_coding	0	0	0.241667	NA	0	0	0.253323	NA	0	0	0.130024	0.949345	0
ALDH3A2	ENSG00000072210	protein_coding	0	0	0.302706	0.21627	0	0	0.388613	0.117237	0	0	0.544859	0.106987	0
TFRC	ENSG00000072274	protein_coding	1	0	0.866822	1.06645e-12	1	0	1.07529	9.98375e-26	1	0	1.06808	1.09898e-06	1
SREBF1	ENSG00000072310	protein_coding	0	0	-0.339545	0.28978	0	0	-0.256756	0.548723	0	0	-0.348863	0.444426	0
TRPC5	ENSG00000072315	protein_coding	0	0	-1.32007	NA	0	0	-1.22234	NA	0	0	-1.51769	NA	0
AFF4	ENSG00000072364	protein_coding	0	0	0.269388	0.0795506	0	0	0.737914	1.95151e-08	1	0	0.828685	0.000768284	1
UBE2D1	ENSG00000072401	protein_coding	0	0	0.501173	0.0961288	0	0	0.92606	0.00609959	1	0	1.09401	0.00865223	1
MPP5	ENSG00000072415	protein_coding	0	0	0.226467	0.393599	0	0	1.01833	6.00468e-06	1	0	1.03883	0.000389256	1
RHOBTB1	ENSG00000072422	protein_coding	0	0	0.368194	0.300276	0	0	0.622058	0.0919448	0	0	0.980123	0.0241607	1
SMC1A	ENSG00000072501	protein_coding	0	0	0.155872	0.238349	0	0	0.391134	5.8119e-07	1	0	0.760439	0.00129487	1
HSD17B10	ENSG00000072506	protein_coding	0	0	-0.0506119	0.91207	0	0	-0.661613	0.0125043	0	1	-0.4516	0.302898	0
MARK2	ENSG00000072518	protein_coding	0	0	0.30112	0.199928	0	0	0.0193466	0.951672	0	0	0.0990116	0.815302	0
HMMR	ENSG00000072571	protein_coding	0	0	0.0711175	0.870764	0	0	0.861109	0.00217692	1	0	0.478265	0.201301	0
CHFR	ENSG00000072609	protein_coding	0	0	-0.121637	0.839075	0	0	-0.437064	0.366259	0	0	-0.2242	0.754349	0
TRHDE	ENSG00000072657	protein_coding	0	0	0.487246	0.685544	0	0	1.06992	0.389831	0	0	1.62427	0.253301	0
P4HA2	ENSG00000072682	protein_coding	0	0	-0.0147726	0.983496	0	0	-0.162341	0.773147	0	0	0.255806	0.728886	0
FCGR2B	ENSG00000072694	protein_coding	0	0	-1.71461	NA	0	0	NA	NA	0	0	NA	NA	0
NFATC3	ENSG00000072736	protein_coding	0	0	-0.0334516	0.937547	0	0	-3.19307e-05	0.999971	0	0	-0.126754	0.802809	0
TRNT1	ENSG00000072756	protein_coding	0	0	-0.323158	0.542387	0	0	0.576378	0.349926	0	0	0.777155	0.269157	0
ACADVL	ENSG00000072778	protein_coding	0	0	-0.399782	0.262114	0	0	-1.04516	0.00041808	0	1	-0.881627	0.031897	0
STK10	ENSG00000072786	protein_coding	0	0	0.140865	0.728343	0	0	-0.10438	0.793922	0	0	0.0560056	0.92901	0
FBXW11	ENSG00000072803	protein_coding	1	0	0.343089	0.0222655	1	0	1.39474	6.21824e-19	1	0	1.08919	4.08961e-06	1
ACAP1	ENSG00000072818	protein_coding	0	0	-1.11807	0.280032	0	0	-0.690103	0.622635	0	0	-1.50328	0.188686	0
CRMP1	ENSG00000072832	protein_coding	0	0	-0.135898	0.787671	0	0	-0.158852	0.750635	0	0	0.112527	0.87469	0
EVC	ENSG00000072840	protein_coding	0	0	-0.236496	0.570897	0	0	-0.678176	0.0411559	0	1	-0.232871	0.69487	0
DERL2	ENSG00000072849	protein_coding	0	0	0.85548	0.00109214	1	0	0.75095	0.0110044	1	0	0.512985	0.202535	0
SIDT1	ENSG00000072858	protein_coding	0	0	-1.08868	NA	0	0	-0.492684	NA	0	0	-0.868174	NA	0
NDE1	ENSG00000072864	protein_coding	0	0	0.485005	NA	0	0	0.71582	NA	0	0	0.876362	NA	0
MRVI1	ENSG00000072952	protein_coding	0	0	-3.51388	NA	0	0	-3.26737	NA	0	0	-3.66213	NA	0
TMEM38A	ENSG00000072954	protein_coding	0	0	0.274124	0.799843	0	0	0.0580232	0.961751	0	0	0.329863	0.799894	0
AP1M1	ENSG00000072958	protein_coding	0	0	-0.124799	0.713796	0	0	-0.488764	0.0444469	0	1	-0.39648	0.266134	0
PVR	ENSG00000073008	protein_coding	0	0	0.285418	0.393813	0	0	-0.04397	0.912031	0	0	0.215391	0.651731	0
XRCC1	ENSG00000073050	protein_coding	0	0	-0.566292	0.193048	0	0	-0.45344	0.423756	0	0	-0.256595	0.764074	0
SCARB1	ENSG00000073060	protein_coding	0	0	-0.163497	0.76251	0	0	-0.896984	0.000754745	0	1	-0.805166	0.0218507	0
CYP2W1	ENSG00000073067	protein_coding	0	0	-0.787106	NA	0	0	-1.16331	NA	0	0	-0.441063	NA	0
MCM2	ENSG00000073111	protein_coding	0	0	-0.153924	0.410672	0	0	-0.0893835	0.513818	0	0	0.226206	0.445562	0
MOV10L1	ENSG00000073146	protein_coding	0	0	-2.45308	NA	0	0	-3.75309	NA	0	0	-2.13227	NA	0
PANX2	ENSG00000073150	protein_coding	0	0	-0.324037	0.712151	0	0	-1.04426	0.128049	0	0	-0.337744	0.769491	0
SELENOO	ENSG00000073169	protein_coding	0	0	-0.492358	0.385832	0	0	-0.591121	0.28988	0	0	-0.598726	0.357241	0
TP63	ENSG00000073282	protein_coding	0	0	NA	NA	0	0	NA	NA	0	0	NA	NA	0
ALPK1	ENSG00000073331	protein_coding	0	0	-0.0682147	0.924084	0	0	0.877581	0.134638	0	0	0.906822	0.171298	0
LLGL2	ENSG00000073350	protein_coding	0	0	-0.446927	0.545177	0	0	-0.861767	0.192011	0	0	-1.02168	0.152336	0
PDE8A	ENSG00000073417	protein_coding	0	0	0.00663649	0.989153	0	0	0.242819	0.506144	0	0	0.327978	0.499338	0
CLCN4	ENSG00000073464	protein_coding	0	0	0.255798	NA	0	0	0.902848	NA	0	0	1.09612	NA	0
NLE1	ENSG00000073536	protein_coding	0	0	-0.120268	0.794716	0	0	-0.601655	0.0481405	0	1	-0.395948	0.380689	0
SDHA	ENSG00000073578	protein_coding	0	0	-0.34962	0.0295804	0	1	-0.303611	0.0918544	0	0	-0.08463	0.846495	0
SMARCE1	ENSG00000073584	protein_coding	1	0	0.54124	0.0228504	1	0	0.678497	0.00999793	1	0	0.750644	0.0306357	1
FNDC8	ENSG00000073598	protein_coding	0	0	1.38606	NA	0	0	0.243511	NA	0	0	-1.34878	NA	0
GSDMB	ENSG00000073605	protein_coding	0	0	-0.560261	0.676955	0	0	0.359859	NA	0	0	0.255357	0.907536	0
KDM5A	ENSG00000073614	protein_coding	1	0	0.309293	0.0374452	1	0	0.970383	3.57268e-13	1	0	0.849719	0.000196161	1
ADAM11	ENSG00000073670	protein_coding	0	0	-0.300496	0.515248	0	0	-0.749338	0.0565527	0	0	-0.723894	0.134838	0
PPP2R3A	ENSG00000073711	protein_coding	0	0	0.326187	0.459487	0	0	0.654743	0.150906	0	0	0.561848	0.337029	0
FERMT2	ENSG00000073712	protein_coding	1	0	0.493662	0.0164483	1	0	0.930324	7.1479e-07	1	0	1.3373	2.59027e-07	1
ABCB11	ENSG00000073734	protein_coding	0	0	0.485005	NA	0	0	0.71582	NA	0	0	0.876362	NA	0
DHRS9	ENSG00000073737	protein_coding	0	0	NA	NA	0	0	-2.16632	NA	0	0	-3.03822	NA	0
CD5L	ENSG00000073754	protein_coding	0	0	NA	NA	0	0	NA	NA	0	0	-1.99497	NA	0
PTGS2	ENSG00000073756	protein_coding	0	0	0.0198493	NA	0	0	1.07313	NA	0	0	-0.201073	NA	0
IGF2BP2	ENSG00000073792	protein_coding	0	0	-0.0997201	0.789454	0	0	-0.298011	0.305062	0	0	-0.208577	0.655443	0
MAP3K13	ENSG00000073803	protein_coding	0	0	0.127626	0.790037	0	0	0.407296	0.371248	0	0	0.239726	0.693367	0
ST6GAL1	ENSG00000073849	protein_coding	0	0	-0.467929	0.344775	0	0	0.202593	0.758032	0	0	0.0453233	0.960763	0
TBX21	ENSG00000073861	protein_coding	0	0	1.34686	NA	0	0	-1.87732	NA	0	0	-0.60966	NA	0
VDAC1P1	ENSG00000073905	processed_pseudogene	0	0	-0.363912	0.766179	0	0	0.163458	0.91556	0	0	0.253664	0.891603	0
FRY	ENSG00000073910	protein_coding	0	0	0.447829	0.44453	0	0	0.22867	0.732225	0	0	0.379579	0.63106	0
PICALM	ENSG00000073921	protein_coding	0	0	0.27595	0.152183	0	0	0.563576	0.00251342	1	0	0.85094	0.00103345	1
NSF	ENSG00000073969	protein_coding	0	0	2.69266	NA	0	0	4.70631	NA	0	0	-0.0383283	0.983827	0
GLI2	ENSG00000074047	protein_coding	0	0	-0.523747	0.286766	0	0	-0.497459	0.361214	0	0	-0.410024	0.560592	0
CLASP1	ENSG00000074054	protein_coding	0	0	0.135579	0.564573	0	0	0.52604	0.00318456	1	0	0.566264	0.035656	1
MRPS34	ENSG00000074071	protein_coding	0	0	-0.0095454	0.983261	0	0	-0.840652	1.73002e-05	0	1	-0.154159	0.806242	0
NOTCH3	ENSG00000074181	protein_coding	0	1	-0.834276	0.000196643	0	1	-1.06568	3.10471e-06	0	1	-0.914613	0.00404812	0
CLNS1A	ENSG00000074201	protein_coding	0	0	0.0923137	0.69195	0	0	0.473039	0.00638099	1	0	0.826279	0.00131829	1
PPP2R2C	ENSG00000074211	protein_coding	0	0	-0.351286	0.498913	0	0	0.55967	0.391112	0	0	0.34255	0.688172	0
TEAD2	ENSG00000074219	protein_coding	0	0	0.190627	0.753928	0	0	0.312126	0.591288	0	0	-0.167621	0.817618	0
EED	ENSG00000074266	protein_coding	0	0	0.327494	0.307674	0	0	0.237673	0.547599	0	0	0.27176	0.57939	0
CDHR2	ENSG00000074276	protein_coding	0	0	-1.02194	NA	0	0	-1.67129	NA	0	0	-1.75931	0.248157	0
SNCB	ENSG00000074317	protein_coding	0	0	-0.113621	0.934621	0	0	-0.271277	0.817125	0	0	-0.00132125	0.999489	0
TSG101	ENSG00000074319	protein_coding	0	0	0.199844	0.609432	0	0	0.209294	0.602962	0	0	0.400747	0.408179	0
NCBP3	ENSG00000074356	protein_coding	0	0	0.0616483	0.804124	0	0	0.444421	0.0102864	1	0	0.280652	0.384	0
ATP2A3	ENSG00000074370	protein_coding	0	0	0.719767	0.284097	0	0	-0.665167	0.2455	0	0	-0.296977	0.735345	0
CA12	ENSG00000074410	protein_coding	0	0	0.0259495	0.977707	0	0	0.263683	0.74117	0	0	0.126617	0.904592	0
MGLL	ENSG00000074416	protein_coding	0	0	-0.242068	NA	0	0	-1.17635	0.239541	0	0	-0.379369	0.826298	0
NTN4	ENSG00000074527	protein_coding	0	0	-0.168252	0.896047	0	0	0.795966	0.529504	0	0	0.608669	0.682855	0
BCS1L	ENSG00000074582	protein_coding	0	0	-0.205707	0.657132	0	0	-0.176969	0.706862	0	0	0.0559835	0.939748	0
NUAK1	ENSG00000074590	protein_coding	0	0	0.34534	0.266063	0	0	0.540838	0.104782	0	0	0.693415	0.0779757	0
DPP8	ENSG00000074603	protein_coding	1	0	0.499172	0.00496478	1	0	0.896923	1.3495e-05	1	0	0.821407	0.00840657	1
SLC24A1	ENSG00000074621	protein_coding	0	0	-0.379831	0.339147	0	0	-0.229326	0.62688	0	0	-0.428444	0.428505	0
ZNF532	ENSG00000074657	protein_coding	0	0	0.111097	0.837677	0	0	0.285383	0.562319	0	0	0.232244	0.721045	0
SCARF1	ENSG00000074660	protein_coding	0	0	NA	NA	0	0	NA	NA	0	0	NA	NA	0
LMAN1	ENSG00000074695	protein_coding	1	0	0.300806	0.036488	1	0	1.07222	4.68202e-16	1	0	0.977609	6.68889e-06	1
HACD3	ENSG00000074696	protein_coding	1	0	0.412703	0.000919613	1	0	0.61872	1.96492e-07	1	0	0.495679	0.0429751	1
IPCEF1	ENSG00000074706	protein_coding	0	0	0.0955511	NA	0	0	1.04067	NA	0	0	0.676537	NA	0
ZZEF1	ENSG00000074755	protein_coding	0	0	-0.0199534	0.943631	0	0	0.0247756	0.914715	0	0	0.0371109	0.929123	0
NOX3	ENSG00000074771	protein_coding	0	0	NA	NA	0	0	NA	NA	0	0	NA	NA	0
ENO1	ENSG00000074800	protein_coding	0	1	-0.369772	0.00142802	0	1	-0.497738	4.2934e-16	0	1	-0.29817	0.183229	0
SLC12A1	ENSG00000074803	protein_coding	0	0	-0.0034356	NA	0	0	-1.42833	NA	0	0	-2.20193	NA	0
MYDGF	ENSG00000074842	protein_coding	0	0	0.0737605	0.877773	0	0	-0.883788	0.00116274	0	1	-0.299595	0.545812	0
ANO8	ENSG00000074855	protein_coding	0	0	-0.729229	0.189475	0	0	-0.633732	0.335122	0	0	-0.638616	0.415503	0
TUBE1	ENSG00000074935	protein_coding	0	0	-0.0783286	0.889627	0	0	0.433069	0.366259	0	0	0.531745	0.346488	0
ARHGEF10L	ENSG00000074964	protein_coding	0	0	-0.530069	0.497489	0	0	0.146098	0.893674	0	0	0.0313339	0.982958	0
TXK	ENSG00000074966	protein_coding	0	0	2.28406	NA	0	0	0.759851	NA	0	0	0.355067	NA	0
WSCD2	ENSG00000075035	protein_coding	0	0	NA	NA	0	0	NA	NA	0	0	-1.99497	NA	0
KCNQ2	ENSG00000075043	protein_coding	0	0	0.506259	0.371032	0	0	-0.244103	0.686595	0	0	-0.45001	0.496276	0
TACR2	ENSG00000075073	protein_coding	0	0	-0.458114	NA	0	0	-1.32734	NA	0	0	-1.83309	NA	0
ACTR6	ENSG00000075089	protein_coding	0	0	0.014534	0.974255	0	0	0.775399	0.0168996	1	0	0.988906	0.0115171	1
TIPIN	ENSG00000075131	protein_coding	0	0	0.563103	0.0103771	1	0	0.610231	0.0159875	1	0	0.528885	0.117323	0
SRI	ENSG00000075142	protein_coding	0	0	-0.0306591	0.953539	0	0	-0.393475	0.25328	0	0	-0.286764	0.557229	0
EIF4G3	ENSG00000075151	protein_coding	0	0	-0.404277	0.00690798	0	1	-0.0588037	0.774947	0	0	0.0501078	0.89428	0
NUP37	ENSG00000075188	protein_coding	0	0	0.231755	0.571332	0	0	0.604439	0.126793	0	0	0.712425	0.133232	0
SEMA3A	ENSG00000075213	protein_coding	0	0	-0.325996	0.689967	0	0	0.919075	0.327811	0	0	0.890158	0.392384	0
GTSE1	ENSG00000075218	protein_coding	0	0	0.377232	0.106481	0	0	-0.123271	0.647004	0	0	0.0408811	0.935997	0
SEMA3C	ENSG00000075223	protein_coding	0	0	0.125261	0.80733	0	0	1.13235	0.0096401	1	0	1.00839	0.05404	0
TTC38	ENSG00000075234	protein_coding	0	0	-0.0691898	0.921308	0	0	-0.619424	0.12544	0	0	-0.735879	0.119857	0
ACAT1	ENSG00000075239	protein_coding	0	0	0.261943	0.225171	0	0	0.384228	0.0672341	0	0	0.668312	0.0205035	1
GRAMD4	ENSG00000075240	protein_coding	0	0	-0.171521	0.671156	0	0	-0.0139638	0.979493	0	0	0.165568	0.801542	0
CELSR1	ENSG00000075275	protein_coding	0	0	-0.325368	0.203132	0	0	-0.707019	0.00190191	0	1	-0.501545	0.168195	0
WNT8B	ENSG00000075290	protein_coding	0	0	-1.19219	NA	0	0	-1.51148	NA	0	0	-0.981236	NA	0
ZNF638	ENSG00000075292	protein_coding	0	0	0.193993	0.231888	0	0	0.586231	1.26201e-05	1	0	0.789145	0.000187912	1
SLC25A40	ENSG00000075303	protein_coding	0	0	0.333784	0.389316	0	0	1.27466	0.00159929	1	0	0.994406	0.0344981	1
TIMM21	ENSG00000075336	protein_coding	0	0	0.122887	0.833479	0	0	0.420682	0.420332	0	0	0.72701	0.217394	0
ADD2	ENSG00000075340	protein_coding	0	0	0.0756823	0.816206	0	0	0.0471368	0.880871	0	0	0.200281	0.606725	0
FGF4	ENSG00000075388	protein_coding	0	0	NA	NA	0	0	NA	NA	0	0	NA	NA	0
RASAL2	ENSG00000075391	protein_coding	0	0	-0.197163	0.46452	0	0	0.537253	0.0404465	1	0	0.394197	0.279657	0
VPS9D1	ENSG00000075399	protein_coding	0	0	-0.171164	0.838573	0	0	-0.474155	0.501142	0	0	-0.789394	0.268885	0
ZNF37A	ENSG00000075407	protein_coding	0	0	0.0951066	0.791935	0	0	0.557414	0.0425471	1	0	0.45268	0.207929	0
MARK3	ENSG00000075413	protein_coding	1	0	0.392512	0.0230371	1	0	0.877796	4.57138e-07	1	0	0.728282	0.00373002	1
SLC25A3	ENSG00000075415	protein_coding	0	0	-0.311179	0.064911	0	0	-0.4524	0.000108079	0	1	-0.275604	0.309399	0
FNDC3B	ENSG00000075420	protein_coding	0	0	-0.372644	0.23405	0	0	0.10461	0.821627	0	0	0.045724	0.947171	0
FOSL2	ENSG00000075426	protein_coding	0	0	1.07844	0.104519	0	0	0.632322	0.396501	0	0	0.12047	0.906698	0
CACNG5	ENSG00000075429	protein_coding	0	0	0.76653	NA	0	0	0.567703	NA	0	0	0.820405	NA	0
CACNG4	ENSG00000075461	protein_coding	0	0	-1.3439	NA	0	0	-1.92798	NA	0	0	-2.65411	NA	0
FRYL	ENSG00000075539	protein_coding	0	0	-0.170261	0.563316	0	0	0.726278	0.00755482	1	0	0.716443	0.038896	1
TMEM131	ENSG00000075568	protein_coding	0	0	-0.0557638	0.866908	0	0	0.171359	0.530229	0	0	0.17575	0.666005	0
FSCN1	ENSG00000075618	protein_coding	0	0	-0.0275923	0.931083	0	0	-0.157279	0.498346	0	0	-0.178308	0.615509	0
ACTB	ENSG00000075624	protein_coding	0	0	0.102288	0.419746	0	0	-0.56834	3.77731e-26	0	1	-0.073647	0.834872	0
MOCOS	ENSG00000075643	protein_coding	0	0	0.18378	0.605917	0	0	0.423519	0.205096	0	0	0.456281	0.28523	0
PLD1	ENSG00000075651	protein_coding	0	0	-0.592312	0.260784	0	0	0.391007	0.632265	0	0	0.440169	0.652453	0
ATP12A	ENSG00000075673	protein_coding	0	0	-0.0136495	NA	0	0	0.81862	NA	0	0	-0.612278	NA	0
WDR62	ENSG00000075702	protein_coding	0	0	-0.539039	0.0518989	0	0	-0.657748	0.0284847	0	1	-0.336757	0.482627	0
DLG1	ENSG00000075711	protein_coding	0	0	0.101685	0.706875	0	0	0.669286	0.00251148	1	0	0.627943	0.0530049	0
RAB7A	ENSG00000075785	protein_coding	0	0	0.231114	0.177039	0	0	0.286348	0.0754745	0	0	0.269667	0.337252	0
BCAP29	ENSG00000075790	protein_coding	0	0	0.459266	0.0785334	0	0	0.62891	0.0341895	1	0	0.797645	0.0300688	1
SEC31B	ENSG00000075826	protein_coding	0	0	-0.838765	0.290756	0	0	-0.804477	0.396377	0	0	-1.69375	0.0211604	0
SART3	ENSG00000075856	protein_coding	0	0	-0.0869961	0.763493	0	0	0.362514	0.119133	0	0	0.609365	0.0502391	0
ARHGAP15	ENSG00000075884	protein_coding	0	0	NA	NA	0	0	NA	NA	0	0	NA	NA	0
TUBA3D	ENSG00000075886	protein_coding	0	0	1.40448	NA	0	0	0.28468	NA	0	0	-1.13921	0.462315	0
PAX2	ENSG00000075891	protein_coding	0	0	-1.23792	0.0992624	0	0	-1.16891	0.217946	0	0	-0.9357	0.432486	0
EXOSC7	ENSG00000075914	protein_coding	0	0	-0.0836727	0.893674	0	0	-0.273017	0.594429	0	0	-0.191523	0.783689	0
KIFAP3	ENSG00000075945	protein_coding	1	0	0.724836	0.00113945	1	0	1.34448	2.99254e-07	1	0	1.60224	4.14646e-07	1
MKRN2	ENSG00000075975	protein_coding	0	0	0.125346	0.694709	0	0	0.339814	0.226234	0	0	0.525204	0.140364	0
MCM6	ENSG00000076003	protein_coding	0	0	0.16636	0.344953	0	0	0.604103	1.24195e-06	1	0	0.93356	8.17794e-06	1
REXO2	ENSG00000076043	protein_coding	0	0	-0.0855716	0.902711	0	0	0.183937	0.78495	0	0	0.348884	0.660802	0
RBM7	ENSG00000076053	protein_coding	0	0	0.447299	0.240448	0	0	1.01102	0.0147513	1	0	1.04501	0.0298699	1
RBMS2	ENSG00000076067	protein_coding	0	0	-0.0577719	0.919389	0	0	0.129902	0.78495	0	0	-0.21406	0.707687	0
BAZ2A	ENSG00000076108	protein_coding	0	0	-0.284139	0.0619283	0	0	-0.25388	0.0972177	0	0	-0.192141	0.514955	0
PTPN23	ENSG00000076201	protein_coding	0	1	-0.880582	0.00263147	0	1	-1.1134	0.000143135	0	1	-1.01188	0.0130756	0
MLH1	ENSG00000076242	protein_coding	0	0	0.1434	NA	0	0	0.375766	NA	0	0	-1.1953	0.487262	0
UNG	ENSG00000076248	protein_coding	0	0	0.416071	0.00879925	1	0	0.498194	0.00281371	1	0	0.497366	0.0567888	0
FMO4	ENSG00000076258	protein_coding	0	0	0.0574815	NA	0	0	0.953452	NA	0	0	0.955365	NA	0
KLHL20	ENSG00000076321	protein_coding	0	0	0.396987	0.224296	0	0	1.04325	0.00176939	1	0	0.963206	0.0161165	1
RGS11	ENSG00000076344	protein_coding	0	0	-0.958851	NA	0	0	-3.35033	NA	0	0	-3.82039	NA	0
SLC46A1	ENSG00000076351	protein_coding	0	0	0.187597	0.838573	0	0	0.202057	0.831613	0	0	0.107923	0.930847	0
PLXNA2	ENSG00000076356	protein_coding	0	0	0.274924	0.614839	0	0	-0.132324	0.81731	0	0	0.0680693	0.937969	0
SPAG5	ENSG00000076382	protein_coding	0	0	-0.0164231	0.968153	0	0	-0.20499	0.495795	0	0	0.107458	0.825257	0
ANKRD13A	ENSG00000076513	protein_coding	0	0	-0.155004	0.626347	0	0	0.311314	0.326364	0	0	0.322853	0.4424	0
TPD52	ENSG00000076554	protein_coding	0	0	0.100293	0.810261	0	0	1.28664	7.46667e-05	1	0	1.05297	0.00557163	1
ACACB	ENSG00000076555	protein_coding	0	0	-0.954979	0.00130675	0	1	-0.61508	0.164679	0	0	-0.749202	0.131377	0
TRAF4	ENSG00000076604	protein_coding	0	0	0.0288702	0.959976	0	0	0.170288	0.713588	0	0	0.249367	0.674358	0
PAG1	ENSG00000076641	protein_coding	0	0	0.099923	0.741538	0	0	0.687487	0.00392335	1	0	0.606184	0.0690189	0
GPATCH1	ENSG00000076650	protein_coding	0	0	0.41379	0.355363	0	0	0.539155	0.245404	0	0	0.454504	0.473644	0
ICAM3	ENSG00000076662	protein_coding	0	0	-1.91421	NA	0	0	-0.704633	NA	0	0	-1.57691	NA	0
NT5C2	ENSG00000076685	protein_coding	0	0	0.251629	0.556015	0	0	0.792523	0.0596916	0	0	0.303297	0.600896	0
MCAM	ENSG00000076706	protein_coding	0	0	0.305868	0.39382	0	0	0.564463	0.129659	0	0	0.329836	0.511558	0
GPC4	ENSG00000076716	protein_coding	0	0	0.298358	0.254781	0	0	0.294242	0.311558	0	0	0.575164	0.104977	0
MBNL3	ENSG00000076770	protein_coding	0	0	-0.0932672	0.703304	0	0	0.700956	0.00078271	1	0	0.78999	0.00923893	1
CAMSAP3	ENSG00000076826	protein_coding	0	0	-0.821611	0.075458	0	0	-0.88663	0.0813021	0	0	-0.496332	0.513995	0
RAP1GAP	ENSG00000076864	protein_coding	0	0	-0.274999	0.739157	0	0	-0.041254	0.968258	0	0	0.078615	0.949345	0
XAB2	ENSG00000076924	protein_coding	0	0	-0.858828	0.00136728	0	1	-0.581878	0.0993969	0	0	-0.182744	0.770094	0
ARHGEF1	ENSG00000076928	protein_coding	0	1	-0.754428	0.00804378	0	1	-0.864118	0.00967115	0	1	-0.866684	0.0381204	0
STXBP2	ENSG00000076944	protein_coding	0	0	-0.927179	0.243831	0	0	-1.18568	0.162924	0	0	-0.854364	0.447267	0
MAP2K7	ENSG00000076984	protein_coding	0	0	-0.387283	0.175331	0	0	-0.652358	0.0197988	0	1	-0.407665	0.372481	0
NMRK2	ENSG00000077009	protein_coding	0	0	-1.54318	NA	0	0	-2.36544	NA	0	0	-3.18687	NA	0
DGKD	ENSG00000077044	protein_coding	0	0	-0.316922	0.354928	0	0	-0.215113	0.577529	0	0	-0.0901346	0.876433	0
CTTNBP2	ENSG00000077063	protein_coding	0	0	-0.834102	0.0536147	0	0	-0.0188098	0.984367	0	0	0.00978088	0.992045	0
ACTL6B	ENSG00000077080	protein_coding	0	0	0.547647	NA	0	0	-0.78227	NA	0	0	-1.67719	NA	0
RARB	ENSG00000077092	protein_coding	0	0	-0.144638	0.796182	0	0	0.535372	0.333979	0	0	0.599272	0.351404	0
TOP2B	ENSG00000077097	protein_coding	0	0	0.229303	0.116977	0	0	0.904161	1.73544e-21	1	0	1.12212	1.83217e-09	1
TM9SF3	ENSG00000077147	protein_coding	1	0	0.325493	0.00763764	1	0	0.917746	1.7668e-22	1	0	0.925703	7.75622e-06	1
NFKB2	ENSG00000077150	protein_coding	0	0	-0.492097	0.177042	0	0	-0.127837	0.811114	0	0	0.0678064	0.939748	0
UBE2T	ENSG00000077152	protein_coding	1	0	0.714666	0.00219596	1	0	0.517697	0.0492362	1	0	0.97783	0.00405486	1
PPP1R12B	ENSG00000077157	protein_coding	0	0	-0.554992	0.0656027	0	0	-0.342632	0.400871	0	0	-0.501	0.278062	0
DNAJC10	ENSG00000077232	protein_coding	1	0	0.37349	0.0166775	1	0	0.81193	5.27624e-09	1	0	0.76181	0.00154999	1
GTF3C1	ENSG00000077235	protein_coding	0	0	0.218066	0.114069	0	0	0.251507	0.0256373	0	0	0.457501	0.0405178	1
IL4R	ENSG00000077238	protein_coding	0	0	0.541219	0.416118	0	0	0.180568	0.803031	0	0	0.73119	0.402622	0
USP33	ENSG00000077254	protein_coding	1	0	0.31256	0.0482384	1	0	1.38129	1.16082e-18	1	0	1.4029	1.34734e-09	1
PAK3	ENSG00000077264	protein_coding	0	0	0.585117	0.571805	0	0	1.19284	0.262495	0	0	1.1449	0.334189	0
CAPN6	ENSG00000077274	protein_coding	0	0	-0.285578	NA	0	0	0.685204	NA	0	0	0.841819	NA	0
DCX	ENSG00000077279	protein_coding	0	0	NA	NA	0	0	-3.69971	NA	0	0	NA	NA	0
SNRPA	ENSG00000077312	protein_coding	0	0	-0.140733	0.724713	0	0	-0.689198	0.00262442	0	1	-0.440791	0.256509	0
SPAG6	ENSG00000077327	protein_coding	0	0	0.290364	NA	0	0	0.112923	NA	0	0	-1.45496	NA	0
EXOSC5	ENSG00000077348	protein_coding	0	0	-0.472298	0.428075	0	0	-1.04612	0.0279963	0	1	-0.834348	0.170914	0
DYNC1I2	ENSG00000077380	protein_coding	0	0	0.174343	0.480703	0	0	0.823677	0.00057682	1	0	0.922004	0.00108688	1
APBB1IP	ENSG00000077420	protein_coding	0	0	NA	NA	0	0	NA	NA	0	0	NA	NA	0
LRCH4	ENSG00000077454	protein_coding	0	0	-0.612113	0.578788	0	0	-1.35611	0.128691	0	0	-1.43826	0.138167	0
FAM76B	ENSG00000077458	protein_coding	1	0	0.633814	0.00856138	1	0	1.57425	1.0326e-07	1	0	1.6061	4.63361e-06	1
SIRT6	ENSG00000077463	protein_coding	0	0	-0.226731	0.774523	0	0	-0.573374	0.394494	0	0	-0.650463	0.402044	0
TYR	ENSG00000077498	protein_coding	0	0	NA	NA	0	0	NA	NA	0	0	NA	NA	0
POLD3	ENSG00000077514	protein_coding	0	0	0.11037	0.742691	0	0	0.695106	0.00928341	1	0	0.386974	0.309438	0
ACTN2	ENSG00000077522	protein_coding	0	0	-0.240689	0.771967	0	0	-0.267872	0.752253	0	0	-0.281788	0.792924	0
CAPZB	ENSG00000077549	protein_coding	0	0	-0.349333	0.150558	0	0	-0.575566	0.0167362	0	1	-0.415699	0.248157	0
GPR137B	ENSG00000077585	protein_coding	0	0	-0.194367	0.801508	0	0	-0.0589578	0.949182	0	0	-0.756385	0.276467	0
NAALAD2	ENSG00000077616	protein_coding	0	0	0.128794	0.869258	0	0	0.449762	0.578784	0	0	0.299158	0.769075	0
JADE1	ENSG00000077684	protein_coding	0	0	0.174191	0.499086	0	0	0.443428	0.0615728	0	0	0.815478	0.00690592	1
SLC25A43	ENSG00000077713	protein_coding	0	0	0.180143	0.842764	0	0	0.485341	0.55737	0	0	0.375966	0.7164	0
UBE2A	ENSG00000077721	protein_coding	0	0	0.464826	0.0234484	1	0	0.379127	0.103365	0	0	0.512247	0.10215	0
FGFR1	ENSG00000077782	protein_coding	0	0	0.0972309	0.746849	0	0	0.342865	0.180032	0	0	0.236804	0.540701	0
FKBP6	ENSG00000077800	protein_coding	0	0	-1.71461	NA	0	0	NA	NA	0	0	NA	NA	0
SMC1B	ENSG00000077935	protein_coding	0	0	0.269832	NA	0	0	-0.631388	NA	0	0	-0.801319	0.631367	0
FBLN1	ENSG00000077942	protein_coding	0	0	-0.304858	0.321413	0	0	-0.38265	0.264982	0	0	0.0632443	0.922406	0
ITGA8	ENSG00000077943	protein_coding	0	0	-0.0750792	0.870764	0	0	1.05093	0.00763095	1	0	1.24471	0.0065406	1
CST7	ENSG00000077984	protein_coding	0	0	1.39694	NA	0	0	-0.812904	NA	0	0	-1.59	NA	0
MAP2	ENSG00000078018	protein_coding	0	0	1.9359	NA	0	0	-0.42726	NA	0	0	0.0566243	NA	0
PIAS2	ENSG00000078043	protein_coding	0	0	-0.0405158	0.921564	0	0	0.486906	0.103887	0	0	0.0274825	0.962854	0
AMPH	ENSG00000078053	protein_coding	0	0	0.325831	0.576032	0	0	1.08983	0.0572619	0	0	0.708203	0.278126	0
ARAF	ENSG00000078061	protein_coding	0	0	0.0914725	0.841577	0	0	-0.195943	0.607552	0	0	-0.0720484	0.90118	0
MCCC1	ENSG00000078070	protein_coding	0	0	-0.00833186	0.992218	0	0	0.138816	0.82851	0	0	0.720455	0.287236	0
LAMP3	ENSG00000078081	protein_coding	0	0	0.860652	NA	0	0	1.24124	NA	0	0	-0.0732483	NA	0
FAP	ENSG00000078098	protein_coding	0	0	-1.71461	NA	0	0	NA	NA	0	0	NA	NA	0
NEBL	ENSG00000078114	protein_coding	0	0	0.0830898	0.848476	0	0	1.25508	0.000761663	1	0	1.08447	0.0118223	1
ACER3	ENSG00000078124	protein_coding	0	0	0.372477	0.268145	0	0	0.316701	0.391634	0	0	0.186501	0.742717	0
UBE2K	ENSG00000078140	protein_coding	1	0	0.420717	0.00147867	1	0	1.06647	1.55513e-14	1	0	0.967061	5.85208e-05	1
PIK3C3	ENSG00000078142	protein_coding	0	0	-0.344073	0.28978	0	0	0.552858	0.166513	0	0	0.397636	0.45038	0
N4BP2	ENSG00000078177	protein_coding	1	0	0.446818	0.0257183	1	0	1.23812	2.74737e-08	1	0	1.25207	9.29707e-06	1
TIGAR	ENSG00000078237	protein_coding	0	0	0.636615	0.0694957	0	0	0.720678	0.0523945	0	0	0.558909	0.240088	0
TULP3	ENSG00000078246	protein_coding	0	0	0.113217	0.826895	0	0	0.24584	0.632192	0	0	0.324489	0.578754	0
SYNJ2	ENSG00000078269	protein_coding	0	0	-0.356375	0.284274	0	0	0.366803	0.370584	0	0	0.363368	0.476341	0
ADCY2	ENSG00000078295	protein_coding	0	0	-0.988283	NA	0	0	-1.78394	NA	0	0	0.444333	NA	0
PPP2R5C	ENSG00000078304	protein_coding	0	0	0.0585202	0.800909	0	0	0.60166	0.000168287	1	0	0.634601	0.00955053	1
PMS2P1	ENSG00000078319	unprocessed_pseudogene	0	0	-0.156604	0.904188	0	0	-0.365294	0.748636	0	0	0.137926	0.937184	0
RBFOX1	ENSG00000078328	protein_coding	0	0	NA	NA	0	0	NA	NA	0	0	NA	NA	0
GNB1	ENSG00000078369	protein_coding	0	0	-0.169281	0.311601	0	0	-0.415994	0.00102311	0	1	-0.121227	0.711148	0
HOXA9	ENSG00000078399	protein_coding	0	0	0.546049	0.114985	0	0	0.801925	0.0288742	1	0	0.55885	0.223229	0
EDN1	ENSG00000078401	protein_coding	0	0	NA	NA	0	0	NA	NA	0	0	-2.13227	NA	0
MLLT10	ENSG00000078403	protein_coding	0	0	-0.287542	0.276692	0	0	0.514634	0.0626472	0	0	0.22195	0.606463	0
ZCWPW1	ENSG00000078487	protein_coding	0	0	-0.697528	0.606183	0	0	0.145555	NA	0	0	-1.1051	0.415831	0
ADCYAP1R1	ENSG00000078549	protein_coding	0	0	0.387272	0.303557	0	0	0.424865	0.308189	0	0	0.197133	0.738459	0
FGF20	ENSG00000078579	protein_coding	0	0	0.485005	NA	0	0	0.71582	NA	0	0	0.876362	NA	0
P2RY10	ENSG00000078589	protein_coding	0	0	NA	NA	0	0	NA	NA	0	0	NA	NA	0
ITM2A	ENSG00000078596	protein_coding	0	0	NA	NA	0	0	NA	NA	0	0	NA	NA	0
NRDC	ENSG00000078618	protein_coding	0	0	-0.188814	0.31688	0	0	0.273184	0.132155	0	0	0.624116	0.0181872	1
VDAC3	ENSG00000078668	protein_coding	0	0	0.0826394	0.739477	0	0	0.29172	0.128558	0	0	0.631941	0.0164374	1
PCM1	ENSG00000078674	protein_coding	0	0	0.0881403	0.698543	0	0	0.840872	1.26191e-08	1	0	0.976767	1.57647e-05	1
TNRC6C	ENSG00000078687	protein_coding	0	0	-0.102526	0.814184	0	0	-0.312092	0.372646	0	0	-0.216333	0.683207	0
CBFA2T2	ENSG00000078699	protein_coding	0	0	-0.372412	0.286989	0	0	0.0905523	0.858163	0	0	-0.108254	0.866487	0
BRINP1	ENSG00000078725	protein_coding	0	0	NA	NA	0	0	NA	NA	0	0	NA	NA	0
ITCH.1	ENSG00000078747	protein_coding	0	0	-0.0766074	0.826023	0	0	0.744465	0.00801887	1	0	1.01843	0.00333623	1
PKD2L2	ENSG00000078795	protein_coding	0	0	-0.234602	0.862638	0	0	0.00781156	0.996098	0	0	-1.07921	0.318932	0
TP53INP2	ENSG00000078804	protein_coding	0	0	-0.0944296	0.93314	0	0	-0.811482	0.239071	0	0	-1.12648	0.109911	0
SDF4	ENSG00000078808	protein_coding	0	0	0.162203	0.564065	0	0	-0.14455	0.602329	0	0	0.451712	0.282059	0
MYH7B	ENSG00000078814	protein_coding	0	0	-0.802821	0.482627	0	0	-1.43868	0.139612	0	0	-2.03971	0.0193378	0
BPIFB2	ENSG00000078898	protein_coding	0	0	NA	NA	0	0	NA	NA	0	0	NA	NA	0
TP73	ENSG00000078900	protein_coding	0	0	-0.112965	0.891385	0	0	-0.580954	0.353818	0	0	-0.556421	0.448258	0
TOLLIP	ENSG00000078902	protein_coding	0	0	0.370848	0.356944	0	0	-0.27741	0.48552	0	0	-0.152631	0.799214	0
UBE2D4	ENSG00000078967	protein_coding	0	0	0.183154	0.81696	0	0	-0.120151	0.880719	0	0	0.110621	0.920339	0
CLUL1	ENSG00000079101	protein_coding	0	0	0.807953	NA	0	0	-0.21179	NA	0	0	0.385833	NA	0
RUNX1T1	ENSG00000079102	protein_coding	0	0	-0.128017	0.745025	0	0	0.00925046	0.985636	0	0	-0.135335	0.805957	0
CDH17	ENSG00000079112	protein_coding	0	0	-1.71461	NA	0	0	-2.25388	NA	0	0	-2.13227	NA	0
THOC1	ENSG00000079134	protein_coding	0	0	0.308573	0.389885	0	0	0.534235	0.148838	0	0	0.601587	0.180166	0
FKBP7	ENSG00000079150	protein_coding	0	0	0.397544	0.575354	0	0	0.13614	0.846697	0	0	0.348341	0.669534	0
OSBPL6	ENSG00000079156	protein_coding	0	0	0.12085	0.723851	0	0	0.576181	0.0515851	0	0	0.351382	0.392958	0
SLC1A3	ENSG00000079215	protein_coding	0	0	0.247689	0.387205	0	0	0.945002	0.000824333	1	0	0.750173	0.0369242	1
XRCC5	ENSG00000079246	protein_coding	1	0	0.314413	0.00870577	1	0	0.81649	1.98409e-24	1	0	0.965858	6.19162e-08	1
LXN	ENSG00000079257	protein_coding	0	0	0.481187	0.721741	0	0	0.812615	0.55234	0	0	0.598956	0.715218	0
SP140	ENSG00000079263	protein_coding	0	0	-1.71461	NA	0	0	NA	NA	0	0	NA	NA	0
MKNK1	ENSG00000079277	protein_coding	0	0	0.138609	0.828901	0	0	-0.365983	0.462264	0	0	-0.172786	0.812444	0
TNS1	ENSG00000079308	protein_coding	0	0	0.380778	0.766482	0	0	0.0127239	0.992745	0	0	-0.1049	0.947841	0
REXO1	ENSG00000079313	protein_coding	0	0	0.270684	0.473488	0	0	-0.258727	0.476814	0	0	-0.16978	0.775892	0
SAR1A	ENSG00000079332	protein_coding	1	0	0.697442	2.12096e-07	1	0	0.716358	4.55929e-08	1	0	0.687307	0.00518675	1
CDC14A	ENSG00000079335	protein_coding	0	0	0.121904	0.852473	0	0	1.14245	0.0633137	0	0	0.917757	0.185181	0
RAPGEF3	ENSG00000079337	protein_coding	0	0	-0.682912	NA	0	0	-1.394	0.264604	0	0	-0.376051	NA	0
CEACAM1	ENSG00000079385	protein_coding	0	0	-1.95803	NA	0	0	-1.39278	NA	0	0	-1.7842	NA	0
SENP1	ENSG00000079387	protein_coding	0	0	0.426932	0.0736738	0	0	0.583424	0.0218208	1	0	0.129224	0.795785	0
DUSP13	ENSG00000079393	protein_coding	0	0	NA	NA	0	0	NA	NA	0	0	-4.09644	NA	0
CIC	ENSG00000079432	protein_coding	0	0	-0.117375	0.757154	0	0	-0.665781	0.00494644	0	1	-0.425441	0.336439	0
LIPE	ENSG00000079435	protein_coding	0	0	-1.10121	0.164481	0	0	-1.4818	0.0617412	0	0	-1.80719	0.020092	0
FDFT1	ENSG00000079459	protein_coding	0	0	0.0112187	0.974817	0	0	0.178331	0.484452	0	0	0.24583	0.512024	0
PAFAH1B3	ENSG00000079462	protein_coding	0	0	-0.0700659	0.932458	0	0	-0.647148	0.262637	0	0	-0.289811	0.748398	0
OPHN1	ENSG00000079482	protein_coding	0	0	-0.0584	0.924084	0	0	0.502664	0.302053	0	0	0.760216	0.19285	0
AFM	ENSG00000079557	protein_coding	0	0	NA	NA	0	0	NA	NA	0	0	-2.13227	NA	0
KIF22	ENSG00000079616	protein_coding	0	0	0.136535	0.625902	0	0	0.191554	0.452319	0	0	0.51138	0.104977	0
SCGN	ENSG00000079689	protein_coding	0	0	-1.71461	NA	0	0	-2.16632	NA	0	0	-1.99497	NA	0
CARMIL1	ENSG00000079691	protein_coding	0	0	0.132773	0.755804	0	0	0.76441	0.0476166	1	0	0.650739	0.167858	0
PGM1	ENSG00000079739	protein_coding	0	0	0.0303999	0.929016	0	0	-0.0497813	0.861092	0	0	0.229674	0.540286	0
DDX1	ENSG00000079785	protein_coding	0	0	-0.00170127	0.995145	0	0	0.562375	7.09442e-05	1	0	0.738126	0.00210902	1
DNM2	ENSG00000079805	protein_coding	0	0	-0.0855052	0.776194	0	0	-0.33062	0.0565353	0	0	-0.0438848	0.918684	0
EPB41L2	ENSG00000079819	protein_coding	0	0	-0.0291382	0.914518	0	0	0.0714658	0.72484	0	0	0.367833	0.185295	0
RIMS1	ENSG00000079841	protein_coding	0	0	-1.25672	NA	0	0	0.364566	NA	0	0	-0.1472	NA	0
MOXD1	ENSG00000079931	protein_coding	0	0	0.0891373	0.842069	0	0	0.547002	0.160516	0	0	0.291996	0.598128	0
STX7	ENSG00000079950	protein_coding	0	0	0.0789366	0.816332	0	0	0.856084	0.00124393	1	0	0.647559	0.0667376	0
RABL2B	ENSG00000079974	protein_coding	0	0	0.213873	0.727545	0	0	0.566453	0.304017	0	0	-0.0721207	0.931971	0
KEAP1	ENSG00000079999	protein_coding	0	0	0.238671	0.494349	0	0	-0.0386483	0.912797	0	0	0.592981	0.158745	0
DDX43	ENSG00000080007	protein_coding	0	0	1.40445	NA	0	0	1.66649	NA	0	0	-0.508547	NA	0
PTPRH	ENSG00000080031	protein_coding	0	0	0.0423423	NA	0	0	-0.560481	NA	0	0	-1.2633	NA	0
DCT	ENSG00000080166	protein_coding	0	0	-0.659354	NA	0	0	1.19739	NA	0	0	0.1458	NA	0
SLC35C2	ENSG00000080189	protein_coding	0	0	-0.253197	0.518156	0	0	-0.537313	0.133897	0	0	-0.858157	0.0407881	0
CRYBG3	ENSG00000080200	protein_coding	0	0	-0.247156	0.307775	0	0	0.554865	0.0337114	1	0	0.598265	0.0866688	0
EPHA6	ENSG00000080224	protein_coding	0	0	-0.346692	0.488762	0	0	0.536756	0.391757	0	0	0.139448	0.874037	0
SCTR	ENSG00000080293	protein_coding	0	0	-0.28913	NA	0	0	3.2607	NA	0	0	3.41606	NA	0
RFX3	ENSG00000080298	protein_coding	0	0	-0.299868	0.606709	0	0	1.29503	0.059904	0	0	1.07983	0.169165	0
RIF1	ENSG00000080345	protein_coding	0	0	0.2509	0.0242837	0	0	0.980575	6.71502e-28	1	0	1.00784	8.36557e-07	1
RAB21	ENSG00000080371	protein_coding	0	0	0.402032	0.0184408	1	0	0.752808	3.87257e-05	1	0	0.528278	0.0919626	0
SLC4A4	ENSG00000080493	protein_coding	0	0	0.200598	0.78028	0	0	0.524949	0.467557	0	0	0.546941	0.510092	0
SMARCA2	ENSG00000080503	protein_coding	0	0	-0.309726	0.251119	0	0	0.0295696	0.944145	0	0	-0.0306533	0.957193	0
RDH8	ENSG00000080511	protein_coding	0	0	NA	NA	0	0	NA	NA	0	0	NA	NA	0
SESN1	ENSG00000080546	protein_coding	0	0	0.17699	0.686891	0	0	0.971891	0.00855941	1	0	1.03707	0.0163086	1
MID2	ENSG00000080561	protein_coding	0	0	-0.0572224	0.899613	0	0	0.232741	0.56208	0	0	0.181258	0.738931	0
PIH1D3	ENSG00000080572	protein_coding	0	0	NA	NA	0	0	NA	NA	0	0	NA	NA	0
COL5A3	ENSG00000080573	protein_coding	0	0	NA	NA	0	0	NA	NA	0	0	-1.99497	NA	0
SRCAP	ENSG00000080603	protein_coding	0	0	-0.778474	0.0973646	0	0	-0.804126	0.147365	0	0	-1.05712	0.068525	0
PUM3	ENSG00000080608	protein_coding	0	0	-0.238106	0.5288	0	0	0.0545014	0.909775	0	0	0.280357	0.599418	0
CPB2	ENSG00000080618	protein_coding	0	0	-1.56009	NA	0	0	-0.156599	NA	0	0	-2.10862	NA	0
CHRNA3	ENSG00000080644	protein_coding	0	0	-0.256277	0.739284	0	0	0.0760697	0.936282	0	0	-0.387621	0.675476	0
KCNN2	ENSG00000080709	protein_coding	0	0	-2.13827	NA	0	0	1.28477	NA	0	0	-1.16702	NA	0
CNOT4	ENSG00000080802	protein_coding	0	0	-0.440542	0.122308	0	0	-0.0581116	0.876349	0	0	-0.115873	0.816332	0
PSEN1	ENSG00000080815	protein_coding	0	0	-0.0202186	0.959976	0	0	0.380797	0.183761	0	0	0.195077	0.654407	0
CPOX	ENSG00000080819	protein_coding	0	0	0.185659	0.500394	0	0	0.83465	0.000119162	1	0	0.994043	0.000496363	1
CLDND1	ENSG00000080822	protein_coding	0	0	0.19306	0.629855	0	0	0.717945	0.0387708	1	0	0.62386	0.176392	0
MOK	ENSG00000080823	protein_coding	0	0	-0.169748	0.859255	0	0	-0.37084	0.668692	0	0	-0.73222	0.39948	0
HSP90AA1	ENSG00000080824	protein_coding	0	0	-0.0853679	0.690889	0	0	0.634559	7.98322e-27	1	0	0.907503	1.36581e-07	1
RBL1	ENSG00000080839	protein_coding	0	0	0.232216	0.415557	0	0	0.639398	0.0166203	1	0	0.621098	0.110529	0
DLGAP4	ENSG00000080845	protein_coding	0	0	-0.397291	0.379813	0	0	-0.792811	0.0534951	0	0	-0.631268	0.227069	0
IGSF9B	ENSG00000080854	protein_coding	0	0	-0.419882	0.619797	0	0	-1.09646	0.0942903	0	0	-1.12776	0.129508	0
CFHR2	ENSG00000080910	protein_coding	0	0	NA	NA	0	0	NA	NA	0	0	NA	NA	0
CROCCP3	ENSG00000080947	transcribed_unprocessed_pseudogene	0	0	-1.09613	0.0974929	0	0	-0.263895	0.82464	0	0	-0.724282	0.5177	0
NDC80	ENSG00000080986	protein_coding	0	0	0.17077	0.653881	0	0	0.888507	0.00768836	1	0	1.17747	0.00463871	1
AP4E1	ENSG00000081014	protein_coding	0	0	0.388381	0.217748	0	0	0.775468	0.0106829	1	0	0.913808	0.0142012	1
RSBN1	ENSG00000081019	protein_coding	0	0	0.101632	0.724158	0	0	1.15584	1.49972e-06	1	0	1.12598	0.000248571	1
MAGI3	ENSG00000081026	protein_coding	0	0	-0.168992	0.516264	0	0	0.560697	0.0178793	1	0	0.836359	0.00764251	1
CXCL2	ENSG00000081041	protein_coding	0	0	1.01026	NA	0	0	3.27005	NA	0	0	0.365393	NA	0
AFP	ENSG00000081051	protein_coding	0	0	NA	NA	0	0	NA	NA	0	0	-2.13227	NA	0
COL4A4	ENSG00000081052	protein_coding	0	0	-0.201192	0.888833	0	0	0.406084	0.77825	0	0	-0.559061	0.679023	0
TCF7	ENSG00000081059	protein_coding	0	0	-0.162286	0.807894	0	0	-0.824102	0.0496384	0	1	-0.77613	0.129107	0
OSTM1	ENSG00000081087	protein_coding	0	0	0.625951	0.0721986	0	0	0.717257	0.0735707	0	0	0.877568	0.063572	0
CDH7	ENSG00000081138	protein_coding	0	0	-1.85624	NA	0	0	-1.52297	NA	0	0	-0.919122	NA	0
IMPG2	ENSG00000081148	protein_coding	0	0	-5.00465	NA	0	0	-3.11498	NA	0	0	-4.66227	NA	0
PCNP	ENSG00000081154	protein_coding	0	0	-0.125634	0.548302	0	0	0.822482	3.14055e-07	1	0	1.01382	1.84943e-05	1
EXD2	ENSG00000081177	protein_coding	0	0	0.114801	0.756778	0	0	0.648447	0.0350144	1	0	0.574912	0.152004	0
ARG2	ENSG00000081181	protein_coding	0	0	0.193471	0.787671	0	0	0.233537	0.741426	0	0	0.375216	0.650249	0
MEF2C	ENSG00000081189	protein_coding	0	0	0.0512653	0.923641	0	0	0.639095	0.12724	0	0	0.890776	0.0692048	0
PTPRC	ENSG00000081237	protein_coding	0	0	-1.71461	NA	0	0	NA	NA	0	0	NA	NA	0
CACNA1S	ENSG00000081248	protein_coding	0	0	-0.327581	NA	0	0	-0.77102	NA	0	0	-2.65267	NA	0
PKP1	ENSG00000081277	protein_coding	0	0	NA	NA	0	0	NA	NA	0	0	NA	NA	0
UBA5	ENSG00000081307	protein_coding	0	0	0.240128	0.4201	0	0	1.00888	0.00018586	1	0	0.839986	0.014778	1
STK17B	ENSG00000081320	protein_coding	0	0	0.423526	0.137405	0	0	1.16107	3.85168e-05	1	0	1.06887	0.00575163	1
CDC14B	ENSG00000081377	protein_coding	0	0	0.266353	0.286155	0	0	0.821722	0.000369079	1	0	0.690948	0.0355044	1
ZNF510	ENSG00000081386	protein_coding	0	0	-0.266809	0.674318	0	0	-0.0341204	0.965293	0	0	0.167605	0.857698	0
LRP2	ENSG00000081479	protein_coding	0	0	0.188238	0.545127	0	0	0.515003	0.0635365	0	0	0.561561	0.115483	0
ZNF506	ENSG00000081665	protein_coding	0	0	-0.322822	NA	0	0	-0.297624	NA	0	0	-1.10876	0.376251	0
JMJD4	ENSG00000081692	protein_coding	0	0	0.0749155	0.93182	0	0	-0.395047	0.545649	0	0	0.155294	0.878277	0
DUSP12	ENSG00000081721	protein_coding	0	0	0.470477	0.401578	0	0	0.421552	0.480921	0	0	0.360468	0.61448	0
AACS	ENSG00000081760	protein_coding	0	0	-0.0710439	0.907318	0	0	-0.59535	0.124982	0	0	-0.346458	0.540286	0
KIAA0141	ENSG00000081791	protein_coding	0	0	-0.185579	0.689308	0	0	-0.536055	0.16455	0	0	-0.396734	0.456162	0
SLC13A1	ENSG00000081800	protein_coding	0	0	1.49452	NA	0	0	1.72167	NA	0	0	1.88296	NA	0
CADPS2	ENSG00000081803	protein_coding	0	0	-0.5138	0.134079	0	0	0.73338	0.133429	0	0	0.623852	0.287236	0
PCDHB4	ENSG00000081818	protein_coding	0	0	0.485005	NA	0	0	0.71582	NA	0	0	0.876362	NA	0
PCDHA6	ENSG00000081842	protein_coding	0	0	NA	NA	0	0	NA	NA	0	0	NA	NA	0
PCDHGA2	ENSG00000081853	protein_coding	0	0	0.434999	NA	0	0	0.685204	NA	0	0	-0.562807	NA	0
HSPB11	ENSG00000081870	protein_coding	0	0	0.242135	0.704288	0	0	-0.291773	0.602548	0	0	0.112183	0.899378	0
PHLPP1	ENSG00000081913	protein_coding	0	0	-0.281357	0.440561	0	0	-0.209782	0.601596	0	0	0.0917865	0.880542	0
ATP8B1	ENSG00000081923	protein_coding	0	0	-0.489238	0.563657	0	0	-0.416668	0.661825	0	0	-0.92427	0.306047	0
IL12RB2	ENSG00000081985	protein_coding	0	0	0.108638	0.916789	0	0	-0.554862	0.39968	0	0	-0.724962	0.304931	0
SMARCD3	ENSG00000082014	protein_coding	0	0	0.0674205	0.919463	0	0	-0.342861	0.453882	0	0	-0.0135974	0.986644	0
WDR70	ENSG00000082068	protein_coding	0	0	-0.0665474	0.889218	0	0	0.121646	0.785072	0	0	0.254975	0.651731	0
FYB	ENSG00000082074	protein_coding	0	0	0.485005	NA	0	0	0.71582	NA	0	0	0.876362	NA	0
MPP4	ENSG00000082126	protein_coding	0	0	-0.71802	NA	0	0	-1.45004	NA	0	0	-1.3059	NA	0
STRADB	ENSG00000082146	protein_coding	0	0	0.223206	0.551959	0	0	0.284286	0.411783	0	0	0.199733	0.693533	0
BZW1	ENSG00000082153	protein_coding	1	0	0.42678	0.00362916	1	0	1.00703	5.67039e-19	1	0	1.17592	1.48615e-07	1
PGR	ENSG00000082175	protein_coding	0	0	0.317646	NA	0	0	0.054386	NA	0	0	2.16482	NA	0
C1QTNF3	ENSG00000082196	protein_coding	0	0	-1.5311	NA	0	0	-1.264	NA	0	0	0.444333	NA	0
ME2	ENSG00000082212	protein_coding	0	0	0.201076	0.445229	0	0	0.812338	0.000407563	1	0	0.942984	0.00217202	1
C5orf22	ENSG00000082213	protein_coding	0	0	0.35227	0.184419	0	0	0.756575	0.00470607	1	0	0.45482	0.302175	0
CCNT2	ENSG00000082258	protein_coding	0	0	-0.851642	3.93624e-06	0	1	0.652948	0.0367266	1	0	0.639271	0.134848	0
FAM135A	ENSG00000082269	protein_coding	0	0	0.290828	0.238349	0	0	1.13006	1.45845e-06	1	0	1.03087	0.000756587	1
COL19A1	ENSG00000082293	protein_coding	0	0	-0.26007	NA	0	0	0.0453837	NA	0	0	-0.0561327	0.97997	0
EPB41L3	ENSG00000082397	protein_coding	0	0	-0.188911	0.498913	0	0	0.0811734	0.805401	0	0	0.357343	0.406779	0
COBLL1	ENSG00000082438	protein_coding	0	0	-0.466461	0.225171	0	0	0.637624	0.227074	0	0	0.520368	0.446111	0
DLG3	ENSG00000082458	protein_coding	0	0	-0.18788	0.600368	0	0	0.123096	0.770494	0	0	0.243895	0.641446	0
KCNK2	ENSG00000082482	protein_coding	0	0	-1.70868	NA	0	0	2.30706	NA	0	0	0.0191669	NA	0
SERTAD4	ENSG00000082497	protein_coding	0	0	0.0447328	NA	0	0	3.69433	NA	0	0	0.406771	NA	0
TRAF5	ENSG00000082512	protein_coding	0	0	0.220074	0.693743	0	0	0.528007	0.318238	0	0	0.450848	0.481075	0
MRPL22	ENSG00000082515	protein_coding	0	0	0.284771	0.538297	0	0	-0.000830147	0.998569	0	0	0.281522	0.630264	0
GEMIN5	ENSG00000082516	protein_coding	1	0	0.609432	0.00329427	1	0	0.96387	2.61469e-09	1	0	1.04513	9.72196e-06	1
OPRK1	ENSG00000082556	protein_coding	0	0	0.485005	NA	0	0	0.71582	NA	0	0	0.876362	NA	0
NFE2L1	ENSG00000082641	protein_coding	0	0	0.145173	0.564798	0	0	0.266056	0.177735	0	0	0.535887	0.0480596	1
SEMA5B	ENSG00000082684	protein_coding	0	0	-0.917944	NA	0	0	-1.52636	NA	0	0	-1.65251	NA	0
GSK3B	ENSG00000082701	protein_coding	0	0	0.0936345	0.705737	0	0	0.606232	0.000620127	1	0	0.574395	0.0361019	1
ITGB5	ENSG00000082781	protein_coding	0	0	0.107471	0.848904	0	0	-0.485789	0.245404	0	0	-0.223613	0.730114	0
ERC1	ENSG00000082805	protein_coding	0	0	0.0339032	0.930918	0	0	-0.118931	0.667568	0	0	0.144424	0.728366	0
XPO1	ENSG00000082898	protein_coding	0	0	-0.0760692	0.657655	0	0	1.28223	1.60997e-46	1	0	1.08816	1.06006e-06	1
LINC01587	ENSG00000082929	processed_transcript	0	0	NA	NA	0	0	NA	NA	0	0	NA	NA	0
RNF13	ENSG00000082996	protein_coding	0	0	-0.0897699	0.836719	0	0	0.339495	0.431724	0	0	0.881014	0.0454752	1
TRPM3	ENSG00000083067	protein_coding	0	0	0.475592	NA	0	0	0.835896	NA	0	0	0.992519	NA	0
PALB2	ENSG00000083093	protein_coding	0	0	0.208869	0.598266	0	0	0.584728	0.108676	0	0	0.460563	0.327114	0
DOPEY1	ENSG00000083097	protein_coding	0	0	-0.144935	0.654628	0	0	1.06361	0.00018575	1	0	0.78287	0.0219547	1
LYRM2	ENSG00000083099	protein_coding	0	0	0.382634	0.108347	0	0	0.882139	0.000309113	1	0	0.613871	0.0800387	0
BCKDHB	ENSG00000083123	protein_coding	0	0	0.131335	0.775018	0	0	0.815871	0.0377961	1	0	0.546833	0.277482	0
KAT6A	ENSG00000083168	protein_coding	0	0	0.269686	0.102376	0	0	0.346073	0.0234721	1	0	0.590295	0.013209	1
ZCCHC6	ENSG00000083223	protein_coding	0	0	0.0645282	0.86671	0	0	0.531272	0.0684709	0	0	0.722165	0.05133	0
ULK2	ENSG00000083290	protein_coding	0	0	0.326711	0.365512	0	0	0.777977	0.0409481	1	0	0.484871	0.331056	0
GRHL2	ENSG00000083307	protein_coding	0	0	0.434999	NA	0	0	-0.81331	NA	0	0	-0.562807	NA	0
TNPO1	ENSG00000083312	protein_coding	1	0	0.609591	2.14645e-09	1	0	1.32104	3.34198e-53	1	0	1.33633	1.11837e-10	1
PLOD1	ENSG00000083444	protein_coding	0	1	-0.562216	0.0435509	0	1	-0.651982	0.049556	0	1	-0.517976	0.248628	0
P2RX5	ENSG00000083454	protein_coding	0	0	1.38105	NA	0	0	-1.72862	NA	0	0	-1.61553	NA	0
ITGAE	ENSG00000083457	protein_coding	0	0	0.028952	0.969207	0	0	-0.3725	0.476247	0	0	-0.21965	0.766508	0
DIS3	ENSG00000083520	protein_coding	1	0	0.576123	2.06267e-08	1	0	1.0257	3.51079e-24	1	0	1.12027	1.31591e-08	1
PIBF1	ENSG00000083535	protein_coding	0	0	-0.449832	0.0363631	0	1	0.525046	0.0692936	0	0	0.59384	0.111105	0
TDRD3	ENSG00000083544	protein_coding	0	0	0.167978	0.723251	0	0	0.250944	0.597883	0	0	0.755031	0.155241	0
AC000111.6	ENSG00000083622	antisense	0	0	NA	NA	0	0	NA	NA	0	0	NA	NA	0
NUFIP1	ENSG00000083635	protein_coding	0	0	0.632649	0.090071	0	0	0.522304	0.20108	0	0	0.891676	0.0545899	0
PDS5B	ENSG00000083642	protein_coding	0	0	0.327053	0.0513158	0	0	1.3349	6.43444e-15	1	0	1.29933	5.0615e-08	1
OXCT1	ENSG00000083720	protein_coding	1	0	0.591255	0.00958121	1	0	1.0582	8.38899e-05	1	0	0.964784	0.00402901	1
RRAGB	ENSG00000083750	protein_coding	0	0	0.366697	0.624012	0	0	-0.0396076	0.961751	0	0	-0.0073372	0.993776	0
EPYC	ENSG00000083782	protein_coding	0	0	NA	NA	0	0	NA	NA	0	0	NA	NA	0
CYLD	ENSG00000083799	protein_coding	1	0	0.575826	0.0363832	1	0	0.867967	0.0013838	1	0	1.11571	0.000850615	1
SLC27A5	ENSG00000083807	protein_coding	0	0	-0.806908	0.492708	0	0	-1.71887	0.0688815	0	0	-1.91171	0.0535521	0
ZNF324	ENSG00000083812	protein_coding	0	0	0.457738	0.238012	0	0	0.41374	0.338298	0	0	0.501305	0.361994	0
ZNF671	ENSG00000083814	protein_coding	0	0	-1.32008	NA	0	0	-1.96893	NA	0	0	-1.60242	NA	0
ZNF416	ENSG00000083817	protein_coding	0	0	0.144613	0.901653	0	0	0.280661	0.796282	0	0	0.504253	0.6934	0
ZNF586	ENSG00000083828	protein_coding	0	0	-0.367402	0.684009	0	0	0.489149	0.661825	0	0	0.113774	0.940442	0
ZNF446	ENSG00000083838	protein_coding	0	0	-0.320988	0.768995	0	0	-0.493743	0.654085	0	0	-0.49868	0.688845	0
ZNF264	ENSG00000083844	protein_coding	0	0	0.745021	0.00399155	1	0	1.06233	0.000454278	1	0	0.283401	0.576369	0
RPS5	ENSG00000083845	protein_coding	0	0	-0.290961	0.140073	0	0	-1.22809	5.67825e-24	0	1	-0.614168	0.0516916	0
FAT1	ENSG00000083857	protein_coding	1	0	0.302446	0.0125221	1	0	0.82349	1.69598e-13	1	0	1.1302	4.94503e-08	1
YTHDC1	ENSG00000083896	protein_coding	0	0	-0.168736	0.884518	0	0	0.762444	0.401952	0	0	0.277886	0.8126	0
CHMP2B	ENSG00000083937	protein_coding	0	0	0.241029	0.290945	0	0	1.04779	1.05639e-06	1	0	1.19029	4.42735e-05	1
SMAP2	ENSG00000084070	protein_coding	0	0	0.0101783	0.98494	0	0	-0.420231	0.21847	0	0	-0.462754	0.277482	0
PPIE	ENSG00000084072	protein_coding	0	0	-0.0135587	0.978758	0	0	-0.0429916	0.930126	0	0	0.261912	0.660271	0
ZMPSTE24	ENSG00000084073	protein_coding	0	0	0.685075	3.51916e-06	1	0	1.19563	5.30404e-13	1	0	0.524617	0.0985576	0
STARD7	ENSG00000084090	protein_coding	1	0	0.562266	1.02754e-06	1	0	0.845148	5.63959e-20	1	0	0.77126	0.00030281	1
NOA1	ENSG00000084092	protein_coding	0	0	-0.349147	0.184058	0	0	0.297603	0.377818	0	0	0.314796	0.479529	0
REST	ENSG00000084093	protein_coding	1	0	0.375745	0.0106236	1	0	1.06852	5.15134e-12	1	0	1.18722	2.58384e-07	1
HAL	ENSG00000084110	protein_coding	0	0	-0.0746541	NA	0	0	-1.43566	0.202084	0	0	-1.66264	0.168195	0
SSH1	ENSG00000084112	protein_coding	0	0	-0.112795	0.721482	0	0	0.169793	0.596394	0	0	-0.107164	0.815626	0
GSTP1	ENSG00000084207	protein_coding	0	1	-0.618376	0.000101989	0	1	-1.22263	5.33654e-18	0	1	-0.531478	0.0967028	0
APLP2	ENSG00000084234	protein_coding	1	0	0.458627	5.10231e-05	1	0	0.70563	1.6845e-15	1	0	0.830304	8.64276e-06	1
FAM234B	ENSG00000084444	protein_coding	0	0	0.28848	0.382889	0	0	0.291349	0.407549	0	0	0.0296822	0.96014	0
SLCO1A2	ENSG00000084453	protein_coding	0	0	0.728608	NA	0	0	1.6943	NA	0	0	1.85211	NA	0
WBP11	ENSG00000084463	protein_coding	0	0	0.0632963	0.848476	0	0	-0.0398349	0.872658	0	0	0.325674	0.333004	0
EIF3I	ENSG00000084623	protein_coding	0	0	0.126943	0.551614	0	0	0.445938	6.09179e-05	1	0	0.490754	0.0245875	1
NKAIN1	ENSG00000084628	protein_coding	0	0	-0.205351	0.873888	0	0	-0.810069	0.405016	0	0	-0.613414	0.620854	0
COL16A1	ENSG00000084636	protein_coding	0	0	-0.625499	NA	0	0	-1.05841	NA	0	0	-1.75232	NA	0
TXLNA	ENSG00000084652	protein_coding	0	0	0.877921	6.93529e-11	1	0	0.00657539	0.971561	0	0	0.156901	0.580617	0
APOB	ENSG00000084674	protein_coding	0	0	NA	NA	0	0	NA	NA	0	0	NA	NA	0
NCOA1	ENSG00000084676	protein_coding	0	0	-0.0458687	0.91657	0	0	0.0706201	0.858163	0	0	0.347173	0.44309	0
AGBL5	ENSG00000084693	protein_coding	0	0	-0.278313	0.31049	0	0	-0.470201	0.0538856	0	0	-0.138155	0.762358	0
EFR3B	ENSG00000084710	protein_coding	0	0	0.162475	0.796182	0	0	0.25809	0.668851	0	0	0.465033	0.518043	0
KIF3C	ENSG00000084731	protein_coding	0	0	-0.509771	0.190398	0	0	-0.244379	0.653115	0	0	-0.456041	0.432842	0
RAB10	ENSG00000084733	protein_coding	0	0	0.229179	0.135438	0	0	0.804666	1.35009e-08	1	0	0.470295	0.134838	0
GCKR	ENSG00000084734	protein_coding	0	0	-1.71461	NA	0	0	-4.52983	NA	0	0	NA	NA	0
HADHA	ENSG00000084754	protein_coding	0	0	0.00268361	0.992915	0	0	0.406358	0.00494948	1	0	0.669382	0.00361793	1
MAPRE3	ENSG00000084764	protein_coding	0	0	0.409509	0.648117	0	0	-0.0429578	0.96634	0	0	-0.299881	0.775892	0
CAD	ENSG00000084774	protein_coding	0	1	-0.881318	1.26482e-12	0	1	-1.03219	5.48446e-17	0	1	-0.781553	0.000619788	0
CD59	ENSG00000085063	protein_coding	0	0	0.166405	0.635676	0	0	0.438654	0.167305	0	0	0.447254	0.276564	0
CD82	ENSG00000085117	protein_coding	0	0	-0.246858	NA	0	0	-0.145202	NA	0	0	-0.160838	0.94079	0
BCORL1	ENSG00000085185	protein_coding	0	0	-0.24431	0.480932	0	0	-0.468398	0.0314365	0	1	-0.430367	0.180399	0
ATRX	ENSG00000085224	protein_coding	0	0	-0.0764094	0.686941	0	0	0.492111	0.000263829	1	0	0.694113	0.00181816	1
AK6	ENSG00000085231	protein_coding	0	0	NA	NA	0	0	NA	NA	0	0	NA	NA	0
FCN1	ENSG00000085265	protein_coding	0	0	0.485005	NA	0	0	0.71582	NA	0	0	0.876362	NA	0
MYNN	ENSG00000085274	protein_coding	0	0	0.182098	0.720941	0	0	0.54922	0.234	0	0	0.422981	0.484841	0
MECOM	ENSG00000085276	protein_coding	0	0	-0.155815	0.597907	0	0	0.640273	0.0279746	1	0	0.827928	0.0200894	1
SCAMP1	ENSG00000085365	protein_coding	0	0	0.137811	0.531698	0	0	1.23106	3.43942e-11	1	0	1.23552	1.11344e-06	1
PREP	ENSG00000085377	protein_coding	0	0	0.248605	0.377273	0	0	0.623462	0.0113917	1	0	1.04955	0.00153035	1
HACE1	ENSG00000085382	protein_coding	0	0	0.473368	0.0541602	0	0	1.53609	2.30938e-07	1	0	1.04738	0.00177013	1
SEH1L	ENSG00000085415	protein_coding	1	0	0.421831	0.0190807	1	0	1.21537	5.52605e-11	1	0	1.05597	8.67198e-05	1
WDR47	ENSG00000085433	protein_coding	0	0	0.193263	0.629782	0	0	0.492312	0.193595	0	0	0.999648	0.0244761	1
WDFY1	ENSG00000085449	protein_coding	0	0	0.343605	0.129927	0	0	0.594761	0.011349	1	0	0.705733	0.0197667	1
OVGP1	ENSG00000085465	protein_coding	0	0	0.0200058	0.98873	0	0	-0.812502	0.335097	0	0	-1.18316	0.164315	0
SLC25A24	ENSG00000085491	protein_coding	0	0	0.381107	0.0610449	0	0	1.43713	7.26271e-11	1	0	1.40566	1.88829e-06	1
MAP3K4	ENSG00000085511	protein_coding	0	0	0.262794	0.247862	0	0	0.710806	0.000897805	1	0	0.883734	0.00184265	1
PILRA	ENSG00000085514	protein_coding	0	0	-1.28859	NA	0	0	-2.46082	NA	0	0	-2.692	0.0495745	0
IGSF9	ENSG00000085552	protein_coding	0	0	0.0060847	NA	0	0	-1.16887	NA	0	0	-0.332776	NA	0
ABCB1	ENSG00000085563	protein_coding	0	0	0.0826462	0.923671	0	0	1.06667	0.135306	0	0	0.846715	0.295195	0
ZNF213	ENSG00000085644	protein_coding	0	0	-0.346402	0.553211	0	0	-0.439404	0.446753	0	0	-0.178456	0.833635	0
AKR1B1	ENSG00000085662	protein_coding	0	1	-0.477083	0.00711386	0	1	-0.767647	7.71491e-06	0	1	-0.459256	0.13328	0
CPNE3	ENSG00000085719	protein_coding	0	0	0.253653	0.0880503	0	0	1.31129	2.01223e-26	1	0	1.02668	5.34271e-05	1
RRN3	ENSG00000085721	protein_coding	0	0	0.753494	0.391172	0	0	0.747817	0.400081	0	0	0.900344	0.370657	0
CTTN	ENSG00000085733	protein_coding	0	0	0.100679	0.663646	0	0	-0.0795697	0.708957	0	0	0.412045	0.188667	0
WNT11	ENSG00000085741	protein_coding	0	0	0.540201	NA	0	0	-0.733107	0.502893	0	0	0.242256	0.893506	0
MTIF2	ENSG00000085760	protein_coding	0	0	0.145215	0.598718	0	0	0.797082	0.000385369	1	0	0.90043	0.00152104	1
DDHD2	ENSG00000085788	protein_coding	1	0	0.349455	0.0364931	1	0	1.04953	6.48486e-10	1	0	0.931813	0.000148772	1
TTC39A	ENSG00000085831	protein_coding	0	0	-0.0664604	0.935266	0	0	-0.210999	0.764547	0	0	-0.308221	0.714392	0
EPS15	ENSG00000085832	protein_coding	0	0	0.0457487	0.870455	0	0	0.87559	8.63413e-06	1	0	1.00302	0.000195064	1
ORC1	ENSG00000085840	protein_coding	0	0	-0.0661261	0.830174	0	0	0.413815	0.107613	0	0	0.784087	0.0150393	1
MGST2	ENSG00000085871	protein_coding	0	0	-0.290367	0.797192	0	0	-0.479884	0.613281	0	0	-0.753885	0.440185	0
CHERP	ENSG00000085872	protein_coding	0	0	-0.0887582	0.787671	0	0	-0.449647	0.0571484	0	0	0.0239254	0.962831	0
ATG16L1	ENSG00000085978	protein_coding	0	0	NA	NA	0	0	NA	NA	0	0	NA	NA	0
USP40	ENSG00000085982	protein_coding	0	0	0.122377	0.769916	0	0	0.369614	0.340322	0	0	0.331825	0.485243	0
POMGNT1	ENSG00000085998	protein_coding	0	0	-0.726314	0.0227137	0	1	-0.751946	0.0580059	0	0	-0.547199	0.29904	0
RAD54L	ENSG00000085999	protein_coding	0	0	-0.736269	0.0176869	0	1	-0.299759	0.54729	0	0	-0.647151	0.183065	0
MAST2	ENSG00000086015	protein_coding	0	0	-0.484814	0.059463	0	0	-0.440564	0.161636	0	0	-0.223085	0.681666	0
DNAJA1	ENSG00000086061	protein_coding	1	0	0.459396	0.00133226	1	0	0.621445	5.7808e-08	1	0	0.84263	3.20266e-05	1
B4GALT1	ENSG00000086062	protein_coding	0	0	0.195599	0.551614	0	0	0.162853	0.634766	0	0	-0.14825	0.767107	0
CHMP5	ENSG00000086065	protein_coding	0	0	0.199952	0.475277	0	0	0.459979	0.0727321	0	0	0.69463	0.0372971	1
NFX1	ENSG00000086102	protein_coding	0	0	-0.207732	0.456178	0	0	0.0189144	0.958886	0	0	0.135038	0.768001	0
AQP6	ENSG00000086159	protein_coding	0	0	-0.341103	NA	0	0	-1.97192	NA	0	0	-3.11548	0.00599544	0
DIMT1	ENSG00000086189	protein_coding	0	0	0.30255	0.177309	0	0	0.906965	5.28075e-05	1	0	0.97596	0.00159686	1
IPO11	ENSG00000086200	protein_coding	0	0	0.351049	0.140511	0	0	1.11231	5.97598e-09	1	0	1.02858	0.000202309	1
FOLH1	ENSG00000086205	protein_coding	0	0	4.14704	NA	0	0	0.0967528	NA	0	0	0.801962	NA	0
EIF2AK1	ENSG00000086232	protein_coding	0	0	0.249618	0.119278	0	0	0.648467	9.50053e-07	1	0	0.592976	0.00932155	1
NME8	ENSG00000086288	protein_coding	0	0	NA	NA	0	0	NA	NA	0	0	NA	NA	0
EPDR1	ENSG00000086289	protein_coding	0	0	0.313476	0.621027	0	0	0.306803	0.650907	0	0	0.842238	0.263223	0
SNX10	ENSG00000086300	protein_coding	0	0	0.170461	0.776184	0	0	0.893671	0.115997	0	0	1.12421	0.0763502	0
SEPHS1	ENSG00000086475	protein_coding	1	0	0.452116	0.0255017	1	0	0.676573	9.06778e-05	1	0	1.03377	4.54559e-05	1
MRPL28	ENSG00000086504	protein_coding	0	0	-0.512481	0.0917375	0	0	-1.09558	6.12179e-05	0	1	-0.472791	0.317321	0
HBQ1	ENSG00000086506	protein_coding	0	0	-0.602081	NA	0	0	-1.31611	NA	0	0	-1.1447	0.512331	0
ITPKC	ENSG00000086544	protein_coding	0	0	-0.232	0.78028	0	0	-0.0235632	0.981233	0	0	0.458577	0.658736	0
CEACAM6	ENSG00000086548	protein_coding	0	0	NA	NA	0	0	NA	NA	0	0	NA	NA	0
FAT2	ENSG00000086570	protein_coding	0	0	-1.33937	NA	0	0	-1.03548	NA	0	0	-1.41977	0.338272	0
RBM22	ENSG00000086589	protein_coding	0	0	0.279736	0.368523	0	0	-0.123342	0.706601	0	0	-0.157289	0.728384	0
TMED2	ENSG00000086598	protein_coding	1	0	0.45376	0.000277412	1	0	1.07968	1.29219e-16	1	0	0.832194	0.00135929	1
ERO1B	ENSG00000086619	protein_coding	0	0	0.0711672	0.863475	0	0	1.3095	2.94193e-05	1	0	0.895044	0.0174481	1
ZFAND6	ENSG00000086666	protein_coding	0	0	0.218845	0.475323	0	0	0.924866	0.00103566	1	0	1.12492	0.0017695	1
HSD17B2	ENSG00000086696	protein_coding	0	0	0.844256	NA	0	0	-1.60791	NA	0	0	-2.177	0.129391	0
TXLNG	ENSG00000086712	protein_coding	0	0	0.128729	0.550603	0	0	0.76673	1.44029e-05	1	0	0.776518	0.00219014	1
PPEF1	ENSG00000086717	protein_coding	0	0	2.2765	NA	0	0	1.52256	NA	0	0	4.17407	NA	0
LAT2	ENSG00000086730	protein_coding	0	0	-0.659697	0.619207	0	0	-1.21106	0.215825	0	0	-1.74803	0.0548	0
HUWE1	ENSG00000086758	protein_coding	0	0	-0.103675	0.426541	0	0	-0.0239184	0.807402	0	0	0.230921	0.290685	0
ZW10	ENSG00000086827	protein_coding	0	0	-0.382758	0.157611	0	0	-0.0631905	0.873347	0	0	0.0538864	0.927062	0
ALG9	ENSG00000086848	protein_coding	0	0	-0.00452623	0.996117	0	0	0.118234	0.880871	0	0	0.182304	0.853204	0
MYBPC2	ENSG00000086967	protein_coding	0	0	0.440671	NA	0	0	-0.986014	NA	0	0	-0.611743	NA	0
NOX4	ENSG00000086991	protein_coding	0	0	-1.71461	NA	0	0	NA	NA	0	0	-3.15461	NA	0
ACOX3	ENSG00000087008	protein_coding	0	0	-0.0909034	0.902711	0	0	-0.625442	0.196859	0	0	-0.506579	0.420463	0
MTMR2	ENSG00000087053	protein_coding	0	0	0.315237	0.143537	0	0	0.834256	3.57989e-06	1	0	0.92521	0.00101675	1
PPP1R15A	ENSG00000087074	protein_coding	0	0	0.30395	0.486402	0	0	0.385029	0.387805	0	0	0.810468	0.122782	0
HSD17B14	ENSG00000087076	protein_coding	0	0	-1.15262	NA	0	0	-1.52741	NA	0	0	-1.60858	NA	0
TRIP6	ENSG00000087077	protein_coding	0	0	-0.300128	0.332094	0	0	-0.610971	0.0347266	0	1	-0.235645	0.672455	0
ACHE	ENSG00000087085	protein_coding	0	0	0.166948	0.919463	0	0	-0.457575	0.702935	0	0	-0.544164	0.692165	0
FTL	ENSG00000087086	protein_coding	0	0	-0.561413	0.467932	0	0	-1.35238	9.43817e-15	0	1	-0.970315	0.000482777	0
SRRT	ENSG00000087087	protein_coding	0	0	-0.128057	0.582517	0	0	-0.625325	4.28742e-05	0	1	-0.0901771	0.861949	0
BAX	ENSG00000087088	protein_coding	0	0	-0.26345	0.561896	0	0	-1.21552	1.10666e-05	0	1	-1.12128	0.0012884	0
NLK	ENSG00000087095	protein_coding	0	0	-0.0383154	0.949088	0	0	0.492859	0.269267	0	0	0.285003	0.630264	0
PIGS	ENSG00000087111	protein_coding	0	0	0.26483	0.218222	0	0	0.188089	0.405024	0	0	-0.147283	0.733528	0
ADAMTS2	ENSG00000087116	protein_coding	0	0	0.302214	0.636117	0	0	-0.39425	0.471331	0	0	0.367233	0.641443	0
TMPRSS11E	ENSG00000087128	protein_coding	0	0	NA	NA	0	0	NA	NA	0	0	NA	NA	0
ATXN7L3	ENSG00000087152	protein_coding	0	0	0.340366	0.104191	0	0	0.123098	0.628094	0	0	0.429634	0.163965	0
PGS1	ENSG00000087157	protein_coding	0	0	-0.122924	0.832025	0	0	-0.402437	0.418972	0	0	-0.720969	0.158385	0
PSMC5	ENSG00000087191	protein_coding	0	0	-0.271273	0.38155	0	0	-0.575679	0.0276074	0	1	-0.0259404	0.969741	0
UIMC1	ENSG00000087206	protein_coding	0	0	-0.10791	0.74034	0	0	0.384959	0.202069	0	0	0.575969	0.141794	0
CETP	ENSG00000087237	protein_coding	0	0	-0.983821	NA	0	0	-2.39257	NA	0	0	-2.88196	NA	0
MMP2	ENSG00000087245	protein_coding	0	0	0.399995	0.755689	0	0	0.0796066	0.953943	0	0	-0.370688	0.77514	0
MT3	ENSG00000087250	protein_coding	0	0	NA	NA	0	0	NA	NA	0	0	-1.99497	NA	0
LPCAT2	ENSG00000087253	protein_coding	0	0	0.250172	0.495081	0	0	1.06378	0.00881639	1	0	0.646806	0.143151	0
GNAO1	ENSG00000087258	protein_coding	0	0	-1.14819	0.0116562	0	1	-0.905262	0.156431	0	0	-0.722159	0.372481	0
OGFOD1	ENSG00000087263	protein_coding	0	0	0.227321	0.438016	0	0	0.510994	0.0709026	0	0	0.275347	0.49574	0
SH3BP2	ENSG00000087266	protein_coding	0	0	0.258203	0.594498	0	0	-0.11978	0.798303	0	0	-0.208062	0.710928	0
NOP14	ENSG00000087269	protein_coding	0	0	-0.0477604	0.877763	0	0	-0.126225	0.605336	0	0	0.143147	0.724263	0
ADD1	ENSG00000087274	protein_coding	1	0	0.421651	0.00605702	1	0	0.633233	1.58653e-05	1	0	0.740978	0.00133883	1
L2HGDH	ENSG00000087299	protein_coding	0	0	0.265743	0.39197	0	0	0.907863	0.00398867	1	0	0.685652	0.0980798	0
TXNDC16	ENSG00000087301	protein_coding	0	0	-0.114	0.755986	0	0	0.764794	0.0191509	1	0	0.909711	0.0217312	1
C14orf166	ENSG00000087302	protein_coding	0	0	0.200725	0.395647	0	0	0.199662	0.395918	0	0	0.642873	0.0292524	1
NID2	ENSG00000087303	protein_coding	0	0	-0.0463438	0.932699	0	0	-0.399538	0.284078	0	0	-0.434672	0.344701	0
GMCL1	ENSG00000087338	protein_coding	0	0	0.068252	0.839443	0	0	0.621245	0.0208721	1	0	0.779192	0.0233502	1
SF3B2	ENSG00000087365	protein_coding	0	0	0.244874	0.0798302	0	0	0.126229	0.347359	0	0	0.650613	0.0316358	1
KLHL42	ENSG00000087448	protein_coding	0	0	0.5801	0.0444756	1	0	0.720542	0.0308957	1	0	0.338958	0.473337	0
GNAS	ENSG00000087460	protein_coding	0	1	-0.515885	1.03119e-06	0	1	-0.821087	7.44561e-23	0	1	-0.3521	0.219068	0
DNM1L	ENSG00000087470	protein_coding	0	0	0.253081	0.22474	0	0	0.786226	1.39312e-06	1	0	0.784958	0.00127432	1
PTHLH	ENSG00000087494	protein_coding	0	0	-4.26717	NA	0	0	NA	NA	0	0	-3.03822	NA	0
PHACTR3	ENSG00000087495	protein_coding	0	0	0.520425	0.656184	0	0	0.396966	0.750635	0	0	0.458732	0.770641	0
ERGIC2	ENSG00000087502	protein_coding	1	0	0.602632	0.00474227	1	0	0.97704	6.57797e-05	1	0	1.09386	0.000331686	1
TFAP2C	ENSG00000087510	protein_coding	0	0	0.530029	0.488025	0	0	0.420581	0.608514	0	0	0.434546	0.660985	0
AURKA	ENSG00000087586	protein_coding	0	0	0.459192	0.0289993	1	0	0.303311	0.164169	0	0	0.753045	0.0160966	1
CASS4	ENSG00000087589	protein_coding	0	0	0.394012	NA	0	0	-1.26023	NA	0	0	-1.5238	NA	0
PIR	ENSG00000087842	protein_coding	0	0	-0.150498	0.839443	0	0	0.0854608	0.919391	0	0	0.11637	0.914368	0
AAMDC	ENSG00000087884	protein_coding	0	0	-1.56567	0.135118	0	0	-1.43558	NA	0	0	-1.70462	0.199917	0
RFX2	ENSG00000087903	protein_coding	0	0	-0.661301	0.209576	0	0	-0.419679	0.553565	0	0	-0.282679	0.762774	0
METTL2A	ENSG00000087995	protein_coding	0	0	0.561906	0.0274853	1	0	0.731687	0.011151	1	0	0.303065	0.50305	0
SULT2B1	ENSG00000088002	protein_coding	0	0	0.114827	NA	0	0	-0.927124	NA	0	0	-1.0637	NA	0
ALG6	ENSG00000088035	protein_coding	0	0	0.422372	0.0963891	0	0	0.558633	0.0490791	1	0	0.331841	0.48868	0
CNOT3	ENSG00000088038	protein_coding	0	0	-0.18882	0.841877	0	0	-1.0597	0.0646579	0	0	-0.149391	0.908387	0
GP6	ENSG00000088053	protein_coding	0	0	NA	NA	0	0	NA	NA	0	0	NA	NA	0
PTPN4	ENSG00000088179	protein_coding	0	0	-0.1862	0.559553	0	0	0.602948	0.0621022	0	0	0.565977	0.152004	0
DDX18	ENSG00000088205	protein_coding	1	0	0.682112	8.06365e-09	1	0	1.21064	1.27328e-25	1	0	1.22399	4.32568e-09	1
KHSRP	ENSG00000088247	protein_coding	0	0	-0.212335	0.0798302	0	0	-0.556409	2.66184e-12	0	1	-0.548167	0.0038838	0
GNA11	ENSG00000088256	protein_coding	0	0	0.412155	0.123142	0	0	-0.419463	0.0923186	0	0	-0.14457	0.748398	0
ASAP3	ENSG00000088280	protein_coding	0	0	NA	NA	0	0	NA	NA	0	0	NA	NA	0
EDEM2	ENSG00000088298	protein_coding	0	0	-0.643435	0.260611	0	0	-0.481998	0.4882	0	0	-0.285417	0.761941	0
DNMT3B	ENSG00000088305	protein_coding	0	0	-0.198152	0.521987	0	0	-0.0211115	0.958886	0	0	-0.168694	0.715013	0
REM1	ENSG00000088320	protein_coding	0	0	0.434999	NA	0	0	0.685204	NA	0	0	0.841819	NA	0
TPX2	ENSG00000088325	protein_coding	0	0	0.123654	0.540006	0	0	0.222461	0.110564	0	0	0.635797	0.00598699	1
FER1L4	ENSG00000088340	transcribed_unitary_pseudogene	0	0	-0.463528	0.699389	0	0	-0.66148	0.577975	0	0	-1.35315	0.170914	0
PDRG1	ENSG00000088356	protein_coding	0	0	0.207873	0.696845	0	0	0.041963	0.947466	0	0	0.27515	0.690252	0
EPB41L1	ENSG00000088367	protein_coding	0	0	0.0739592	0.875081	0	0	-0.179569	0.632828	0	0	0.101391	0.857393	0
SLC15A1	ENSG00000088386	protein_coding	0	0	1.75008	NA	0	0	2.70805	NA	0	0	1.45608	NA	0
DOCK9	ENSG00000088387	protein_coding	0	0	0.0405802	0.936319	0	0	0.472072	0.224539	0	0	0.12998	0.827025	0
ANKRD10	ENSG00000088448	protein_coding	0	0	0.354789	0.378958	0	0	0.509652	0.233816	0	0	0.439607	0.401512	0
TGDS	ENSG00000088451	protein_coding	0	0	0.40614	0.234589	0	0	0.995282	0.00271075	1	0	1.04448	0.00749601	1
DOCK3	ENSG00000088538	protein_coding	0	0	-0.484875	0.117474	0	0	-0.124574	0.790332	0	0	-0.298962	0.571635	0
C3orf18	ENSG00000088543	protein_coding	0	0	0.860494	0.368523	0	0	0.96497	0.350219	0	0	0.512343	0.687181	0
COQ9	ENSG00000088682	protein_coding	0	0	-0.0236748	0.969207	0	0	0.328059	0.455942	0	0	1.15653	0.0306357	1
TMEM40	ENSG00000088726	protein_coding	0	0	NA	NA	0	0	NA	NA	0	0	-2.91218	NA	0
KIF9	ENSG00000088727	protein_coding	0	0	-0.197316	0.869831	0	0	-0.328634	0.771079	0	0	-0.504961	0.677561	0
ARHGAP28	ENSG00000088756	protein_coding	0	0	0.189709	0.81679	0	0	0.454229	0.567503	0	0	0.944114	0.282321	0
CRLS1	ENSG00000088766	protein_coding	0	0	0.367304	0.231403	0	0	0.709663	0.00804628	1	0	0.767702	0.0246165	1
DEFB127	ENSG00000088782	protein_coding	0	0	NA	NA	0	0	NA	NA	0	0	NA	NA	0
PPP1R13B	ENSG00000088808	protein_coding	0	0	-0.536635	0.190321	0	0	-0.147857	0.794445	0	0	-0.115086	0.880542	0
ATRN	ENSG00000088812	protein_coding	0	0	-0.118839	0.632544	0	0	0.521503	0.0154939	1	0	0.586616	0.0479069	1
SMOX	ENSG00000088826	protein_coding	0	0	-0.044043	0.971535	0	0	-0.429934	0.651855	0	0	-0.487574	0.646798	0
SIGLEC1	ENSG00000088827	protein_coding	0	0	-3.30384	NA	0	0	-1.66028	NA	0	0	-2.20182	NA	0
FKBP1A	ENSG00000088832	protein_coding	0	0	-0.1315	0.580942	0	0	-0.222416	0.265616	0	0	-0.524334	0.091138	0
NSFL1C	ENSG00000088833	protein_coding	0	0	-0.154039	0.673391	0	0	-0.354441	0.232244	0	0	0.108179	0.846168	0
SLC4A11	ENSG00000088836	protein_coding	0	0	-0.523211	0.436485	0	0	-0.969673	0.120535	0	0	-1.00476	0.151243	0
C20orf194	ENSG00000088854	protein_coding	0	0	-0.134306	0.819448	0	0	0.275402	0.619714	0	0	-0.0171116	0.983539	0
ZNF343	ENSG00000088876	protein_coding	0	0	-0.0183682	0.981989	0	0	0.108411	0.874308	0	0	0.156018	0.853449	0
EBF4	ENSG00000088881	protein_coding	0	0	-0.352765	0.651238	0	0	-0.538033	0.476451	0	0	-0.677621	0.403558	0
CPXM1	ENSG00000088882	protein_coding	0	0	-2.87478	NA	0	0	-3.09244	NA	0	0	-0.691712	NA	0
MAVS	ENSG00000088888	protein_coding	0	0	0.0863313	0.723654	0	0	0.0728787	0.748636	0	0	-0.00139013	0.997651	0
LZTS3	ENSG00000088899	protein_coding	0	0	0.152518	0.78028	0	0	-0.0467221	0.935406	0	0	-0.100383	0.884153	0
F11	ENSG00000088926	protein_coding	0	0	NA	NA	0	0	NA	NA	0	0	-1.99497	NA	0
XRN2	ENSG00000088930	protein_coding	0	0	0.0885721	0.702769	0	0	0.857792	3.47843e-09	1	0	1.12363	3.68923e-07	1
KIZ	ENSG00000088970	protein_coding	0	0	0.0471526	0.942964	0	0	0.526035	0.336068	0	0	0.579378	0.380323	0
DYNLL1	ENSG00000088986	protein_coding	0	0	0.284861	0.226743	0	0	-0.378089	0.079933	0	0	0.0221439	0.962831	0
TESC	ENSG00000088992	protein_coding	0	0	-0.617009	0.575354	0	0	-1.35337	0.137096	0	0	-1.06128	0.36756	0
SNX5	ENSG00000089006	protein_coding	0	0	-0.380983	0.00980306	0	1	0.122847	0.537192	0	0	0.205449	0.519205	0
RPL6	ENSG00000089009	protein_coding	0	0	0.0149819	0.949157	0	0	-0.275374	0.00024434	0	0	0.25388	0.37581	0
SIRPG	ENSG00000089012	protein_coding	0	0	NA	NA	0	0	NA	NA	0	0	NA	NA	0
MAPKAPK5	ENSG00000089022	protein_coding	0	0	0.331892	0.17901	0	0	0.659679	0.00751992	1	0	0.499474	0.144532	0
P2RX7	ENSG00000089041	protein_coding	0	0	1.06127	NA	0	0	0.835896	NA	0	0	3.4371	NA	0
ESF1	ENSG00000089048	protein_coding	0	0	0.125572	0.69802	0	0	0.562147	0.0220504	1	0	0.689509	0.036432	1
RBBP9	ENSG00000089050	protein_coding	0	0	0.178749	0.624453	0	0	0.557818	0.0951095	0	0	0.501125	0.280889	0
ANAPC5	ENSG00000089053	protein_coding	0	0	-0.0357469	0.889336	0	0	0.0499696	0.803185	0	0	0.168277	0.596023	0
SLC23A2	ENSG00000089057	protein_coding	0	0	0.432867	0.0290938	1	0	0.155293	0.551408	0	0	0.0606729	0.908387	0
SLC8B1	ENSG00000089060	protein_coding	0	0	-0.5672	0.37699	0	0	-0.190535	0.835139	0	0	-0.565413	0.521922	0
TMEM230	ENSG00000089063	protein_coding	0	0	-0.199122	0.550607	0	0	-0.269189	0.355597	0	0	-0.0678697	0.905048	0
DZANK1	ENSG00000089091	protein_coding	0	0	-0.107818	0.940318	0	0	1.19377	0.343103	0	0	0.472553	0.756092	0
KDM2B	ENSG00000089094	protein_coding	0	0	0.00380659	0.993173	0	0	-0.058028	0.8627	0	0	0.126514	0.797792	0
CFAP61	ENSG00000089101	protein_coding	0	0	-0.660069	NA	0	0	-1.25977	NA	0	0	-1.65697	NA	0
LHX5	ENSG00000089116	protein_coding	0	0	-2.35973	NA	0	0	-2.25388	NA	0	0	NA	NA	0
TASP1	ENSG00000089123	protein_coding	0	0	-0.442268	0.308248	0	0	-0.00641131	0.992745	0	0	-0.0243378	0.979082	0
OAS1	ENSG00000089127	protein_coding	0	0	NA	NA	0	0	NA	NA	0	0	NA	NA	0
GCN1	ENSG00000089154	protein_coding	0	1	-0.561314	7.56748e-06	0	1	-0.607988	4.21429e-08	0	1	-0.327909	0.198459	0
RPLP0	ENSG00000089157	protein_coding	0	1	-0.641844	3.7825e-12	0	1	-1.1463	5.60609e-60	0	1	-0.692143	0.001421	0
PXN	ENSG00000089159	protein_coding	0	0	-0.135285	0.79592	0	0	-0.682772	0.0620703	0	0	-0.681433	0.137522	0
SIRT4	ENSG00000089163	protein_coding	0	0	-0.0239739	NA	0	0	2.85129	NA	0	0	-0.167398	NA	0
RPH3A	ENSG00000089169	protein_coding	0	0	0.485005	NA	0	0	-1.80396	NA	0	0	0.876362	NA	0
KIF16B	ENSG00000089177	protein_coding	0	0	-0.313721	0.403276	0	0	-0.16641	0.726978	0	0	0.0224968	0.976311	0
TRMT6	ENSG00000089195	protein_coding	0	0	0.32279	0.332923	0	0	0.231053	0.524296	0	0	0.241845	0.621236	0
CHGB	ENSG00000089199	protein_coding	0	0	-0.172583	NA	0	0	-0.187924	NA	0	0	-1.97412	NA	0
PEBP1	ENSG00000089220	protein_coding	0	0	-0.027541	0.935266	0	0	-0.265967	0.135053	0	0	0.120699	0.747891	0
TBX5	ENSG00000089225	protein_coding	0	0	NA	NA	0	0	NA	NA	0	0	NA	NA	0
BRAP	ENSG00000089234	protein_coding	0	0	-0.00452671	0.993343	0	0	0.693511	0.0461544	1	0	0.580292	0.184915	0
ERP29	ENSG00000089248	protein_coding	0	1	-0.669702	0.00162913	0	1	-0.629328	0.0138004	0	1	-0.110059	0.835803	0
NOS1	ENSG00000089250	protein_coding	0	0	NA	NA	0	0	NA	NA	0	0	-2.13227	NA	0
FUS	ENSG00000089280	protein_coding	0	0	-0.0596368	0.79415	0	0	-0.599474	4.84691e-08	0	1	-0.239519	0.508458	0
IGBP1	ENSG00000089289	protein_coding	0	0	0.119196	0.784881	0	0	0.225318	0.593191	0	0	0.512635	0.314989	0
FXYD5	ENSG00000089327	protein_coding	0	0	-0.406063	0.664305	0	0	-1.13637	0.0635205	0	0	-0.639694	0.478301	0
ZNF302	ENSG00000089335	protein_coding	0	0	0.119389	0.80895	0	0	0.273981	0.550973	0	0	0.829651	0.110871	0
GRAMD1A	ENSG00000089351	protein_coding	0	0	-1.16484	1.27863e-07	0	1	-0.444549	0.262164	0	0	-0.378259	0.48868	0
FXYD3	ENSG00000089356	protein_coding	0	0	-0.238821	NA	0	0	-2.34575	NA	0	0	-1.45691	NA	0
HEPH	ENSG00000089472	protein_coding	0	0	NA	NA	0	0	NA	NA	0	0	NA	NA	0
CDIP1	ENSG00000089486	protein_coding	0	0	-0.649393	NA	0	0	-1.54107	0.174618	0	0	-0.941084	0.565303	0
CMTM1	ENSG00000089505	protein_coding	0	0	-0.817547	NA	0	0	-0.939254	NA	0	0	-0.69716	NA	0
KCNH4	ENSG00000089558	protein_coding	0	0	-1.08295	NA	0	0	-0.369907	NA	0	0	-0.415134	NA	0
GANAB	ENSG00000089597	protein_coding	0	0	-0.197676	0.196084	0	0	-0.198733	0.0837062	0	0	-0.169283	0.522275	0
GMIP	ENSG00000089639	protein_coding	0	0	-0.775105	0.236778	0	0	-1.50354	0.00984847	0	1	-0.949134	0.323437	0
RBM41	ENSG00000089682	protein_coding	0	0	-0.808052	0.00606549	0	1	-0.0695087	0.902393	0	0	-0.172978	0.79458	0
BIRC5	ENSG00000089685	protein_coding	0	0	0.260309	0.132372	0	0	0.128275	0.435243	0	0	0.148737	0.625742	0
LAG3	ENSG00000089692	protein_coding	0	0	-0.59393	NA	0	0	-0.105709	NA	0	0	-2.18292	NA	0
MLF2	ENSG00000089693	protein_coding	0	0	-0.215256	0.418176	0	0	-0.842128	1.72268e-07	0	1	-0.759088	0.00288495	0
OTUB2	ENSG00000089723	protein_coding	0	0	-0.0034356	NA	0	0	1.66649	NA	0	0	-1.73273	NA	0
DDX24	ENSG00000089737	protein_coding	0	0	-1.41101	0.0321057	0	1	0.685044	0.629128	0	0	0.613345	0.715218	0
ZBTB25	ENSG00000089775	protein_coding	0	0	-0.100846	0.849547	0	0	0.767984	0.106652	0	0	-0.0159197	0.983656	0
NECAP1	ENSG00000089818	protein_coding	0	0	0.0248945	0.963409	0	0	0.0665051	0.895249	0	0	-0.0399485	0.952847	0
ARHGAP4	ENSG00000089820	protein_coding	0	0	-0.0970937	NA	0	0	-1.47684	0.107046	0	0	-2.01601	0.0137653	0
ANKRD24	ENSG00000089847	protein_coding	0	0	-0.528381	NA	0	0	-0.486741	NA	0	0	-1.25222	NA	0
DHX32	ENSG00000089876	protein_coding	0	0	0.184312	0.628176	0	0	1.08424	0.000550813	1	0	0.92403	0.0159563	1
RCOR1	ENSG00000089902	protein_coding	0	0	0.405689	0.077525	0	0	0.597098	0.0179686	1	0	0.492168	0.168725	0
GPATCH2L	ENSG00000089916	protein_coding	0	0	-0.0832701	0.769305	0	0	0.33634	0.135968	0	0	0.309614	0.359258	0
LTBP4	ENSG00000090006	protein_coding	0	0	-0.434186	0.234991	0	0	-0.677216	0.00782866	0	1	-0.495465	0.238062	0
BLVRB	ENSG00000090013	protein_coding	0	0	-0.5838	0.429654	0	0	-0.993189	0.1137	0	0	-0.958194	0.188269	0
SLC9A1	ENSG00000090020	protein_coding	0	0	-0.796688	0.108775	0	0	-1.50861	0.000180537	0	1	-1.81711	1.36466e-05	0
SPTLC1	ENSG00000090054	protein_coding	0	0	0.139736	0.67936	0	0	0.885366	0.000243622	1	0	0.86608	0.00478868	1
PAPOLA	ENSG00000090060	protein_coding	0	0	0.282099	0.0311165	0	0	0.666313	3.69403e-10	1	0	0.64457	0.00158474	1
CCNK	ENSG00000090061	protein_coding	0	0	-0.110185	0.880876	0	0	-0.191128	0.7828	0	0	-0.152684	0.861161	0
PCBP4	ENSG00000090097	protein_coding	0	0	0.139672	0.891993	0	0	-0.406029	0.621404	0	0	-0.550264	0.541442	0
RGS1	ENSG00000090104	protein_coding	0	0	NA	NA	0	0	-2.16632	NA	0	0	NA	NA	0
YPEL3	ENSG00000090238	protein_coding	0	0	-0.479205	0.652554	0	0	-1.03686	0.219595	0	0	-0.748597	0.520796	0
MRPS33	ENSG00000090263	protein_coding	0	0	-0.0252575	0.964516	0	0	-0.0870608	0.855544	0	0	0.0326277	0.962831	0
NDUFB2	ENSG00000090266	protein_coding	0	0	-0.260782	0.659057	0	0	-0.574809	0.271594	0	0	-0.773032	0.169032	0
NUDC	ENSG00000090273	protein_coding	0	0	-0.159212	0.546314	0	0	-0.461241	0.0146863	0	1	0.0738994	0.882686	0
MAEA	ENSG00000090316	protein_coding	0	0	0.218037	0.455514	0	0	0.388915	0.122985	0	0	0.362182	0.313323	0
ICAM1	ENSG00000090339	protein_coding	0	0	0.0834428	NA	0	0	0.640489	NA	0	0	0.0172719	NA	0
STRN4	ENSG00000090372	protein_coding	0	0	0.105826	0.684352	0	0	-0.0313713	0.90665	0	0	0.0318486	0.94189	0
IRAK3	ENSG00000090376	protein_coding	0	0	1.51258	NA	0	0	2.25528	NA	0	0	0.496522	NA	0
LYZ	ENSG00000090382	protein_coding	0	0	NA	NA	0	0	NA	NA	0	0	-2.13227	NA	0
SI	ENSG00000090402	protein_coding	0	0	NA	NA	0	0	NA	NA	0	0	NA	NA	0
MUL1	ENSG00000090432	protein_coding	0	0	0.469281	0.168965	0	0	0.206624	0.62355	0	0	0.15342	0.795156	0
TFAP4	ENSG00000090447	protein_coding	0	0	-0.517859	0.0986646	0	0	-0.690372	0.0378097	0	1	-0.673541	0.106693	0
PDCD7	ENSG00000090470	protein_coding	0	0	0.133264	0.770647	0	0	0.210573	0.632146	0	0	0.321233	0.552471	0
SPG21	ENSG00000090487	protein_coding	0	0	-0.190237	0.535441	0	0	0.200305	0.553962	0	0	-0.155634	0.758662	0
FETUB	ENSG00000090512	protein_coding	0	0	-0.874399	NA	0	0	1.66649	NA	0	0	0.415881	NA	0
DNAJB11	ENSG00000090520	protein_coding	0	0	0.200693	0.696884	0	0	0.0878559	0.873347	0	0	0.12765	0.866781	0
P3H2	ENSG00000090530	protein_coding	0	0	-0.440652	NA	0	0	0.15813	NA	0	0	-0.33722	NA	0
THPO	ENSG00000090534	protein_coding	0	0	-1.68974	NA	0	0	-0.962316	NA	0	0	-2.19913	NA	0
[truncated: 56,107 more rows]

## Sheet: C-unstressed
unstressed					G3BP1 vs. untargeted				post- vs. pre- enrichment				label vs. omit probe
[truncated: 57,993 more rows]

[truncated: 3 more sheets: D-1 hr post-stress, E-3 hr post-stress, F-notes and column definition]
